# Supplementary material for: Dynamic tissue-specific H2Bub1 is required for human and mouse cardiogenesis
Source: Research Square preprint supplement (doi:10.21203/rs.3.rs-1498907/v1), 2022-04-01
Supplement: Supplementary file 1 [file 2ee14cae6c3621709ad4c076.xlsx]

## Sheet: iPSC, WT v RNF20 Het1, WT up
Chromosome	Start	End	Mean Concentration of Reads in WT	Mean Concentration of Reads in RNF20 Het1	Fold	p-value	FDR	Gene Start	Gene End	SYMBOL
chr21	10429048	10432902	7.28	-0.26	7.54	1.18e-09	1.13e-05	10413532	10491615	BAGE2
chr2	89772856	89787766	7.79	-0.26	8.05	2.05e-09	1.34e-05	89622213	89640635	LOC101927050
chr1	143237082	143242099	8.16	-0.26	8.43	2.06e-09	1.34e-05	143419625	143420207	LSP1P5
chr20	28803678	28810417	7.19	-0.26	7.45	3.68e-09	1.91e-05	28564916	28602843	FRG1CP
chr21	7926150	7929180	7.01	-0.26	7.28	5.14e-09	2.19e-05	7816675	7829926	KCNE1B
chr16	46394219	46395205	11.39	-0.26	11.65	5.47e-09	2.22e-05	46474122	46478439	ANKRD26P1
chr16	34592582	34593647	10.41	-0.26	10.67	2.05e-08	4.11e-05	34353616	34381110	CCNYL3
chr21	10794578	10799618	6.68	-0.26	6.94	2.17e-08	4.11e-05	10521575	10605716	TPTE
chr21	7965545	7969969	6.99	-0.26	7.26	3.12e-08	4.65e-05	7816675	7829926	KCNE1B
chr16	34571559	34574482	9.39	-0.26	9.66	5.86e-08	6.32e-05	34353616	34381110	CCNYL3
chr13	16245708	16248337	6.27	-0.26	6.53	7.01e-08	6.82e-05	18195297	18232024	FAM230C
chr19	24373814	24378941	6.41	0.22	6.19	7.22e-08	6.82e-05	24162370	24163425	HAVCR1P1
chr21	10810237	10814452	6.33	-0.26	6.59	8.89e-08	7.63e-05	10521575	10605716	TPTE
chr21	10805190	10808116	6.38	-0.26	6.64	1.25e-07	9.52e-05	10521575	10605716	TPTE
chr19	27338035	27340397	6.28	-0.26	6.55	1.39e-07	0.000103	27681072	27793138	LINC00662
chr21	5241961	5245207	6.24	-0.26	6.5	1.56e-07	0.000112	5130871	5154658	LOC102724159
chr21	10750815	10756092	7.37	-0.26	7.64	1.82e-07	0.000121	10521575	10605716	TPTE
chr1	143261951	143264790	8.78	-0.26	9.05	1.98e-07	0.000129	143419625	143420207	LSP1P5
chr1	125166930	125168722	6.15	-0.26	6.41	2.54e-07	0.000151	121519345	121568791	EMBP1
chr21	7961921	7964061	6.02	-0.26	6.29	3.08e-07	0.000173	7816675	7829926	KCNE1B
chr1	123156873	123160702	5.87	-0.26	6.13	4.13e-07	0.000203	121519345	121568791	EMBP1
chrUn_GL000219v1	61129	63817	6.22	-0.26	6.49	4.74e-07	0.000221	54224	83311	LOC283788
chr7	62401287	62406467	6.15	-0.26	6.42	4.99e-07	0.000228	63291518	63303988	ZNF733P
chr1	124098504	124100474	6.5	0.11	6.4	1.05e-06	0.000377	121519345	121568791	EMBP1
chr21	10389614	10394320	6.72	1.5	5.22	1.23e-06	0.000418	10413477	10452529	BAGE2
chr21	10658195	10661265	6.4	0.58	5.81	1.39e-06	0.00045	10521575	10605716	TPTE
chr19	27356901	27359770	5.88	-0.26	6.14	1.42e-06	0.000451	27681072	27793138	LINC00662
chr20	28819304	28825705	7.02	-0.26	7.28	2.25e-06	0.000586	28564916	28602843	FRG1CP
chr21	9006228	9007273	5.61	-0.26	5.87	2.26e-06	0.000587	8986999	8987178	MIR3648-1
chr9	63817738	63820087	5.5	-0.26	5.76	2.38e-06	0.00061	63819574	63819654	MIR4477B
chr13	16156553	16164774	6.75	-0.26	7.01	2.86e-06	0.000694	18195297	18232024	FAM230C
chr17	26860624	26863711	5.76	-0.26	6.02	3.09e-06	0.000728	27293910	27293996	MIR4522
chr15	20238879	20240906	5.75	-0.26	6.01	3.43e-06	0.000784	20282744	20291558	CHEK2P2
chr19	27365229	27367191	5.32	-0.26	5.59	3.85e-06	0.000849	27681072	27793138	LINC00662
chr1	143248177	143249016	6.53	-0.26	6.79	4.36e-06	0.000928	143419625	143420207	LSP1P5
chr21	10666434	10667415	5.33	-0.26	5.59	5.1e-06	0.00101	10521575	10605716	TPTE
chr7	58064120	58065350	5.32	-0.26	5.58	5.37e-06	0.00104	57450177	57473559	ZNF716
chr22	12357077	12360687	5.38	0.4	4.98	5.84e-06	0.00111	11827523	11910358	LOC102723769
chr18	79618492	79620713	5.51	0.75	4.76	5.87e-06	0.00112	79578063	79589010	LOC284240
chr22	16455955	16457608	5.26	-0.26	5.53	6.84e-06	0.00122	16590751	16592810	CCT8L2
chr21	10005909	10007272	5.4	0.58	4.81	7.15e-06	0.00125	9781910	9816833	LINC01667
chr21	5297389	5298303	5.31	-0.26	5.57	8.29e-06	0.00137	5130871	5154658	LOC102724159
chr16	34588041	34588919	9.87	3.06	6.8	9.58e-06	0.00153	34353616	34381110	CCNYL3
chr10	38580095	38581918	5.3	0.11	5.2	1.15e-05	0.00171	38696424	38697902	ACTR3BP5
chr19	24363525	24367590	5.86	1.12	4.75	1.15e-05	0.00171	24162370	24163425	HAVCR1P1
chr1	125079797	125082054	5.06	-0.26	5.33	1.28e-05	0.00185	121519345	121568791	EMBP1
chrUn_GL000220v1	134867	151768	6.44	-0.26	6.7	1.32e-05	0.00189	155997	156149	RNA5-8SN4
chr20	29694722	29695901	5.09	-0.26	5.35	1.39e-05	0.00197	29548661	29559705	FAM242B
chr22_KI270733v1_random	118501	126068	6.05	-0.26	6.31	1.48e-05	0.00204	128877	129029	RNA5-8SN4
chr22	10716999	10719717	6.49	1.61	4.89	1.49e-05	0.00204	10939388	10961338	FRG1FP
chr22	15680810	15685239	5.04	-0.26	5.3	1.85e-05	0.00233	15690026	15721631	POTEH
chr22	12488892	12492801	4.95	-0.26	5.21	2.02e-05	0.00248	11827523	11910358	LOC102723769
chr14	106347494	106349256	5.23	0.43	4.8	2.03e-05	0.00248	106287674	106288828	LINC00226
chr10	42104153	42104944	5.56	1.12	4.45	2.5e-05	0.00289	42336101	42353011	LOC441666
chr1	143245448	143246001	5.38	-0.26	5.65	2.58e-05	0.00294	143419625	143420207	LSP1P5
chr13	17387855	17390430	5.27	-0.26	5.53	2.93e-05	0.00319	18195297	18232024	FAM230C
chr20	29943091	29944301	4.9	-0.26	5.17	3.18e-05	0.00339	30278906	30289205	LINC01597
chr16	36334649	36337466	5.69	-0.26	5.96	3.3e-05	0.00349	35748357	35755796	LINC02167
chr13	16016348	16018521	6.02	0.4	5.62	3.34e-05	0.00352	18195297	18232024	FAM230C
chr1	124376308	124377701	5.29	-0.26	5.56	3.65e-05	0.00374	121519345	121568791	EMBP1
chr9	89770928	89771636	4.84	-0.26	5.1	4.69e-05	0.00436	89825964	90015741	LOC101927847
chr1	124405121	124407882	4.79	-0.26	5.05	4.99e-05	0.0045	121519345	121568791	EMBP1
chr21	10808702	10810230	5.55	-0.26	5.81	5.49e-05	0.00482	10521575	10605716	TPTE
chr13	16121683	16124849	5.63	0.11	5.52	5.7e-05	0.00492	18195297	18232024	FAM230C
chr21	5311822	5314253	4.73	-0.26	4.99	5.96e-05	0.00503	5130871	5154658	LOC102724159
chr19	27383735	27385340	5.55	1.32	4.23	5.97e-05	0.00503	27681072	27793138	LINC00662
chr19	35604986	35605998	5.02	0.4	4.62	5.98e-05	0.00503	35612735	35625355	HAUS5
chrUn_GL000218v1	54350	55867	4.84	-0.26	5.11	6.46e-05	0.00529	51867	54893	LOC389834
chr16	22690538	22692805	4.8	-0.26	5.06	6.69e-05	0.00542	22814162	22916338	HS3ST2
chrY	11113593	11116304	5.38	-0.26	5.64	6.88e-05	0.00553	9910798	9911962	TTTY23
chrX	49589555	49591598	5.44	1.21	4.23	7.23e-05	0.00575	49589529	49596827	GAGE2C
chr10	42090606	42092915	5.44	-0.26	5.7	7.47e-05	0.00587	42336101	42353011	LOC441666
chr2	161278609	161278950	4.72	-0.26	4.99	7.71e-05	0.00596	161246431	161266090	LOC101929512
chr1	122790547	122794103	4.57	-0.26	4.84	9.67e-05	0.00686	121519345	121568791	EMBP1
chr6	170113495	170114168	4.74	-0.26	5	0.00011	0.00742	170160606	170163021	LOC102724511
chr19	27394851	27396036	4.54	-0.26	4.81	0.000111	0.00748	27681072	27793138	LINC00662
chr1	124770919	124773978	5.21	-0.26	5.47	0.000112	0.00749	121519345	121568791	EMBP1
chr16	46406825	46408403	4.8	-0.26	5.07	0.000112	0.00749	46474122	46478439	ANKRD26P1
chr2	91411247	91418071	6.37	1.9	4.47	0.000112	0.00749	91636688	91655378	LSP1P4
chr1	125084413	125085451	5.26	-0.26	5.52	0.000114	0.00756	121519345	121568791	EMBP1
chr20	29861509	29862798	4.64	-0.26	4.9	0.000117	0.00769	29548661	29559705	FAM242B
chr18	15406577	15408153	5.69	1.4	4.29	0.000122	0.00794	15307663	15330282	LOC644669
chr7	62444676	62446644	4.53	-0.26	4.79	0.000126	0.00807	63291518	63303988	ZNF733P
chr22	15835178	15836100	5.05	0.22	4.83	0.000126	0.00812	15805812	15820884	BMS1P22
chr1	124166130	124169905	5.32	0.22	5.1	0.000127	0.00812	121519345	121568791	EMBP1
chr22	11574220	11576580	5.6	1.25	4.35	0.000127	0.00814	11827523	11910358	LOC102723769
chr9	39036003	39037797	5.34	-0.26	5.6	0.000134	0.00838	39078818	39086148	CNTNAP3
chr20	30935650	30937480	4.65	-0.26	4.91	0.000136	0.00848	31257664	31259632	DEFB115
chrUn_GL000219v1	76450	77146	4.65	-0.26	4.91	0.000136	0.00848	54224	83311	LOC283788
chr21	10769316	10771129	4.91	-0.26	5.17	0.000139	0.0086	10521575	10605716	TPTE
chrUn_GL000218v1	116076	118424	5.01	0.85	4.16	0.000142	0.00874	51867	54893	LOC389834
chr22	10720249	10724796	7.36	2.68	4.68	0.000147	0.00893	10939388	10961338	FRG1FP
chr7	62344550	62346623	4.55	-0.26	4.81	0.000161	0.00946	63291518	63303988	ZNF733P
chr13	16745592	16752981	4.67	-0.26	4.94	0.000173	0.00993	18195297	18232024	FAM230C
chr20	28731849	28732963	4.69	-0.26	4.95	0.000173	0.00993	28564916	28602843	FRG1CP
chrUn_GL000219v1	125738	126754	4.78	-0.26	5.04	0.000177	0.0101	54224	83311	LOC283788
chr19	27386510	27388979	5.33	-0.26	5.59	0.000181	0.0102	27681072	27793138	LINC00662
chr1	124452799	124455508	4.8	0.64	4.16	0.000185	0.0104	121519345	121568791	EMBP1
chr9	42387406	42389263	5.04	-0.26	5.3	0.000189	0.0105	42566993	42569310	LOC103908605
chr1	125181566	125183792	9.29	3.58	5.7	0.000194	0.0107	121519345	121568791	EMBP1
chr21	7941015	7941946	6.05	2.37	3.68	0.000194	0.0107	7816675	7829926	KCNE1B
chr1	124305848	124308216	4.99	-0.26	5.25	0.000211	0.0113	121519345	121568791	EMBP1
chr13	17824794	17832207	4.62	-0.26	4.88	0.000218	0.0115	18195297	18232024	FAM230C
chr21	9736613	9738769	6.07	2	4.08	0.000219	0.0116	9806875	9809723	LINC01667
chr20	28548726	28550217	5.03	-0.26	5.29	0.000222	0.0117	28580709	28602664	FRG1CP
chr1	124119194	124120579	5.44	0.4	5.04	0.000225	0.0117	121519345	121568791	EMBP1
chr13	17350652	17353334	4.87	-0.26	5.14	0.000228	0.0118	18195297	18232024	FAM230C
chr1	123028272	123029753	4.75	-0.26	5.02	0.000237	0.0122	121519345	121568791	EMBP1
chr21	10656216	10656846	5.42	1.32	4.1	0.000239	0.0122	10521575	10605716	TPTE
chr20	28781585	28783432	6.07	2	4.08	0.000248	0.0126	28564916	28602843	FRG1CP
chr20	29459849	29460673	4.33	-0.26	4.6	0.000258	0.0128	29480147	29497179	FRG1EP
chr2	89797908	89802089	6.21	2	4.21	0.000259	0.0129	89622213	89640635	LOC101927050
chr1	124203951	124207392	5	-0.26	5.27	0.00026	0.0129	121519345	121568791	EMBP1
chr22	10782121	10784558	6.94	2.58	4.36	0.000267	0.0132	10939388	10961338	FRG1FP
chr11	119777411	119777993	4.41	-0.26	4.68	0.000271	0.0133	119729583	119739623	LOC102724301
chr20	28923651	28924524	4.65	-0.26	4.91	0.000284	0.0137	29080390	29102761	FRG1DP
chr1	124562041	124564336	4.81	-0.26	5.07	0.000288	0.0138	121519345	121568791	EMBP1
chr1	123445658	123452923	4.87	-0.26	5.13	0.000292	0.0139	121519345	121568791	EMBP1
chr9	63828204	63829287	4.9	0.87	4.02	0.000293	0.014	63819574	63819654	MIR4477B
chr9	61591537	61592812	5.14	0.12	5.01	0.000325	0.015	61854148	61924750	FAM27C
chr17	21881173	21882237	4.9	-0.26	5.16	0.000337	0.0154	21692523	21704612	KCNJ18
chr21	12985686	12986696	4.65	0.12	4.52	0.000348	0.0158	13038160	13052118	ANKRD30BP2
chr10	38489723	38491824	4.43	-0.26	4.7	0.000357	0.016	38403189	38452153	LINC00999
chr1	143226817	143228045	4.49	-0.26	4.76	0.000359	0.0161	143419625	143420207	LSP1P5
chr19	12504461	12505310	4.54	-0.26	4.8	0.000359	0.0161	12465609	12513833	ZNF709
chr10	41571873	41572696	4.49	-0.26	4.76	0.000385	0.0168	42336101	42353011	LOC441666
chr7	61050301	61051761	4.84	-0.26	5.11	0.000398	0.0171	63291518	63303988	ZNF733P
chr21	5220123	5220799	4.45	-0.26	4.71	0.000398	0.0171	5130871	5154658	LOC102724159
chr5	17517621	17530421	6.32	2.27	4.05	0.000398	0.0171	17444010	17486829	LINC02218
chrY	56760298	56771447	9.33	3.14	6.18	0.000414	0.0176	56954332	56968979	SPRY3
chr16	34752601	34752751	4.3	-0.26	4.56	0.000418	0.0176	35040164	35084313	CCNYL3
chr13	17587415	17593209	4.25	-0.26	4.51	0.000425	0.0178	18195297	18232024	FAM230C
chr9	68313617	68316226	4.28	-0.26	4.54	0.00043	0.0179	68302867	68305084	FOXD4L3
chr2	89788850	89790361	4.84	-0.26	5.11	0.000435	0.0181	89622213	89640635	LOC101927050
chr2	91869704	91870331	4.98	1.19	3.78	0.000442	0.0182	91940668	91942040	ACTR3BP2
chr1	175556300	175557079	4.47	-0.26	4.73	0.000448	0.0184	175391428	175406364	TNR
chr12	5597152	5597844	4.19	-0.26	4.45	0.000453	0.0185	5608729	5615295	ANO2
chrY	56850134	56851594	6.11	1.49	4.62	0.00046	0.0187	56954332	56968979	SPRY3
chrUn_GL000218v1	130210	132006	4.76	-0.26	5.02	0.000461	0.0187	51867	54893	LOC389834
chr2	8658244	8658854	4.36	-0.26	4.62	0.000464	0.0188	8667863	8676625	ID2-AS1
chr21	10019932	10020746	4.38	-0.26	4.64	0.000466	0.0188	9781910	9816833	LINC01667
chr1	124568348	124570648	4.73	-0.26	4.99	0.000478	0.0191	121519345	121568791	EMBP1
chr21	5221372	5222224	4.81	0.64	4.17	0.000478	0.0191	5130871	5154658	LOC102724159
chr20	29113031	29115401	5.1	0.43	4.67	0.000485	0.0192	29080390	29102761	FRG1DP
chr22	17025384	17026042	4.19	-0.26	4.46	0.000488	0.0193	17036570	17058792	CECR7
chrX	155985207	155986204	4.2	-0.26	4.46	0.000524	0.0202	155997581	156010608	IL9R
chr10	42089148	42089533	4.8	-0.26	5.07	0.000559	0.021	42336101	42353011	LOC441666
chr21	9657353	9658134	4.79	-0.26	5.05	0.00056	0.021	9634244	9679906	LOC105379514
chr21	12983705	12985127	4.69	-0.26	4.95	0.00056	0.021	13038160	13052118	ANKRD30BP2
chr17	26864602	26865554	4.15	-0.26	4.41	0.000565	0.0211	27293910	27293996	MIR4522
chr10	102634616	102635283	4.64	-0.26	4.9	0.000574	0.0213	102642310	102660680	TRIM8
chr21	9792397	9792992	5.09	1.34	3.75	0.000579	0.0214	9806875	9809723	LINC01667
chr9	41244438	41246954	5.75	2.26	3.49	0.000586	0.0215	41233755	41233835	MIR4477A
chr21	10362973	10363671	4.43	-0.26	4.69	0.000586	0.0215	10413477	10452529	BAGE2
chr2	91877742	91878728	5	1.32	3.68	0.00059	0.0216	91940668	91942040	ACTR3BP2
chr22	15784091	15786576	4.8	-0.26	5.06	0.000591	0.0216	15784959	15827434	DUXAP8
chr8	12011855	12012516	4.1	-0.26	4.36	0.000599	0.0218	11993928	11996312	DEFB134
chr20	28941675	28942752	4.48	-0.26	4.74	0.000623	0.0224	29080390	29102761	FRG1DP
chr21	9907129	9908426	4.27	-0.26	4.53	0.00063	0.0226	9781910	9816833	LINC01667
chr21	10669071	10669714	4.63	-0.26	4.89	0.000631	0.0226	10521575	10605716	TPTE
chr12	37720784	37721844	4.83	-0.26	5.1	0.00064	0.0228	38316762	38323982	ALG10B
chr1	124601870	124604213	4.12	-0.26	4.38	0.000642	0.0229	121519345	121568791	EMBP1
chr20	28839002	28843197	7.87	3.02	4.85	0.000653	0.0231	28564916	28602843	FRG1CP
chrY	56865392	56866646	4.25	-0.26	4.51	0.000655	0.0232	56954332	56968979	SPRY3
chr13	17561014	17569499	4.32	-0.26	4.58	0.000659	0.0232	18195297	18232024	FAM230C
chr1	125169707	125170148	4.13	-0.26	4.39	0.000705	0.0242	121519345	121568791	EMBP1
chr7	102618610	102619519	4.35	-0.26	4.62	0.000705	0.0242	102579646	102616757	RASA4
chr17	21821427	21822344	4.41	0.58	3.82	0.00073	0.0247	21692523	21704612	KCNJ18
chr17	41217236	41217796	4.09	-0.26	4.36	0.000732	0.0247	41226648	41227652	KRTAP9-2
chr4	36935	38623	4.24	-0.26	4.5	0.000788	0.0258	53286	87523	ZNF595
chr21	10338115	10339225	4.57	-0.26	4.84	0.000793	0.0259	10413477	10452529	BAGE2
chr21	10354697	10355767	5.14	1.47	3.66	0.0008	0.0261	10413477	10452529	BAGE2
chr6	114094407	114095418	4.12	-0.26	4.38	0.000803	0.0262	114084569	114143918	HDAC2-AS2
chr20	28543093	28544957	4.36	0.22	4.13	0.000815	0.0264	28580709	28602664	FRG1CP
chr21	10447293	10448530	4.26	0.22	4.03	0.000818	0.0264	10454134	10516431	BAGE2
chr21	10783236	10784803	4.89	1.19	3.69	0.000821	0.0265	10521575	10605716	TPTE
chr1	124363811	124366335	4.57	-0.26	4.83	0.000877	0.0277	121519345	121568791	EMBP1
chr1	122900124	122900479	4.1	-0.26	4.36	0.000891	0.0279	121519345	121568791	EMBP1
chr21	9932550	9932827	4.02	-0.26	4.28	0.000922	0.0286	9781910	9816833	LINC01667
chr6	34460866	34462004	4.46	0.43	4.03	0.000924	0.0286	34466061	34535221	PACSIN1
chr16	34172591	34175785	4.08	-0.26	4.34	0.000936	0.0288	34353616	34381110	CCNYL3
chr20	28830184	28831554	5.71	1.7	4.01	0.00096	0.0293	28564916	28602843	FRG1CP
chr16	36121462	36122800	4.57	-0.26	4.84	0.000964	0.0293	35748357	35755796	LINC02167
chr16	89210271	89210882	4.46	-0.26	4.72	0.000968	0.0294	89217703	89229557	ZNF778
chrY	56881054	56881761	4.44	-0.26	4.7	0.000976	0.0294	56954332	56968979	SPRY3
chr22	15710053	15712496	4.82	0.22	4.59	0.000987	0.0296	15699361	15703403	POTEH-AS1
chr2	10218108	10218433	4.4	0.58	3.81	0.00102	0.0302	10192614	10192671	MIR4261
chr7	61048039	61049724	4.58	-0.26	4.84	0.00103	0.0305	63291518	63303988	ZNF733P
chr21	12993254	12994463	3.95	-0.26	4.21	0.00105	0.0308	13038160	13052118	ANKRD30BP2
chr21	7242596	7245503	5.58	1.9	3.68	0.00105	0.0308	7081004	7087229	LOC102723360
chr5	17591998	17597953	4.93	1.34	3.59	0.00106	0.031	17654870	17655847	H3Y1
chr21	10561534	10562253	4.78	1.19	3.59	0.00107	0.0312	10521575	10605716	TPTE
chr22	12436130	12437895	4.47	-0.26	4.73	0.00109	0.0315	11827523	11910358	LOC102723769
chr19	22301297	22301896	4.67	1.22	3.45	0.0011	0.0318	22286441	22317176	ZNF729
chr20	28870707	28873122	5.32	1.81	3.52	0.00112	0.032	29080390	29102761	FRG1DP
chr2	179186716	179188403	4.5	0.58	3.92	0.00112	0.0321	179162483	179191866	SESTD1
chr21	10551314	10552288	4.55	-0.26	4.81	0.00113	0.0321	10521575	10605716	TPTE
chr16	36124192	36125702	4.53	-0.26	4.79	0.00115	0.0326	35748357	35755796	LINC02167
chr1	123097731	123099884	4.43	-0.26	4.69	0.00118	0.0331	121519345	121568791	EMBP1
chr14	19915670	19918488	6.6	0.22	6.37	0.00123	0.034	19920582	19921659	OR4K5
chr1	125069216	125071395	4.45	-0.26	4.72	0.00124	0.0341	121519345	121568791	EMBP1
chr9	40935525	40936071	4.82	1.39	3.43	0.00125	0.0343	40929010	40929092	MIR1299
chr22	15632426	15633480	4.54	-0.26	4.8	0.00127	0.0345	15690026	15721631	POTEH
chr6	61399558	61399891	3.93	-0.26	4.19	0.00129	0.0348	61574328	61574402	MTRNR2L9
chr21	10442022	10443135	4.33	-0.26	4.59	0.00129	0.035	10454134	10516431	BAGE2
chr3	90797356	90798772	4.07	-0.26	4.34	0.0013	0.0351	89107676	89479659	EPHA3
chr21	10353041	10354180	4.24	-0.26	4.5	0.0013	0.0351	10413477	10452529	BAGE2
chr22	12378566	12380180	5.19	1.7	3.49	0.00132	0.0354	11827523	11910358	LOC102723769
chr7	44521902	44522660	4.21	-0.26	4.47	0.00133	0.0355	44512535	44541315	NPC1L1
chr13	17026302	17031114	4.38	-0.26	4.64	0.00134	0.0358	18195297	18232024	FAM230C
chr3	90615716	90617265	3.88	-0.26	4.15	0.00135	0.0359	89107676	89479659	EPHA3
chr9	41251010	41252725	5.7	2.38	3.32	0.00137	0.0362	41233755	41233835	MIR4477A
chr18	15527332	15530105	4.55	0.22	4.33	0.00137	0.0362	15307663	15330282	LOC644669
chr1	122777207	122780060	4.22	0.11	4.11	0.00142	0.037	121519345	121568791	EMBP1
chr20	28884522	28885321	4.13	-0.26	4.39	0.00145	0.0376	29080390	29102761	FRG1DP
chr8	8019898	8021039	4.82	0.64	4.18	0.00149	0.0381	7990415	7997521	DEFB109B
chr1	122818036	122819620	4.33	-0.26	4.59	0.00149	0.0382	121519345	121568791	EMBP1
chrUn_GL000219v1	163543	164584	4.31	-0.26	4.58	0.0015	0.0383	54224	83311	LOC283788
chrUn_GL000195v1	21517	22046	4.27	-0.26	4.53	0.00152	0.0385	42939	49164	LOC389831
chr1	143190004	143191249	6.16	2.51	3.66	0.00152	0.0386	143419625	143420207	LSP1P5
chr13	16638745	16643456	4.22	-0.26	4.49	0.00153	0.0388	18195297	18232024	FAM230C
chr21	10414565	10418594	7.63	3.52	4.1	0.00154	0.0388	10413532	10491615	BAGE2
chr10	41847446	41849202	4.31	-0.26	4.57	0.00156	0.0392	42336101	42353011	LOC441666
chr1	124127665	124129554	3.91	-0.26	4.18	0.00158	0.0394	121519345	121568791	EMBP1
chr20	7622142	7622602	4.15	0.22	3.93	0.00161	0.0399	7371608	7371692	MIR8062
chr21	10000986	10002375	4.29	-0.26	4.56	0.00162	0.04	9781910	9816833	LINC01667
chr19	24343048	24344854	4.32	-0.26	4.59	0.00165	0.0405	24162370	24163425	HAVCR1P1
chr22	15763508	15764584	4.05	-0.26	4.32	0.00165	0.0405	15765687	15778297	PSLNR
chr21	10452635	10453297	4.38	-0.26	4.64	0.00169	0.0411	10454134	10516431	BAGE2
chr2	94537348	94538367	4.28	-0.26	4.55	0.00173	0.0418	94582873	94585473	LOC100133920
chr20	29124563	29125224	4.65	0.68	3.97	0.00175	0.042	29080390	29102761	FRG1DP
chr20	30932349	30933670	4.61	0.4	4.21	0.00177	0.0424	31257664	31259632	DEFB115
chr15	24471036	24471672	4.19	-0.26	4.45	0.00181	0.043	24491458	24587777	PWRN1
chr10	41845267	41846624	4.27	-0.26	4.54	0.00184	0.0433	42336101	42353011	LOC441666
chr2	88773258	88774360	4.24	-0.26	4.51	0.00186	0.0436	88765943	88773568	ANKRD36BP2
chr2	87424020	87424826	4.13	-0.26	4.39	0.00187	0.0438	87454781	87630751	CYTOR
chr22	12349694	12350603	4.16	-0.26	4.43	0.00192	0.0445	11827523	11910358	LOC102723769
chr13	16256949	16257638	3.81	-0.26	4.08	0.00193	0.0446	18195297	18232024	FAM230C
chr7	54350005	54350291	3.88	-0.26	4.14	0.00194	0.0448	54347026	54349849	LINC01445
chr1	124782032	124785015	4.24	-0.26	4.51	0.00196	0.045	121519345	121568791	EMBP1
chr1	121885690	121887009	4.2	-0.26	4.46	0.00197	0.0451	121519345	121568791	EMBP1
chr21	7929871	7939757	8.45	4.42	4.03	0.00197	0.0452	7816675	7829926	KCNE1B
chrX	432463	432954	3.73	-0.26	4	0.002	0.0455	344896	386955	PPP2R3B
chr1	124704747	124708917	3.98	-0.26	4.24	0.002	0.0456	121519345	121568791	EMBP1
chr7	55892830	55893436	4.08	0.4	3.68	0.00204	0.046	55887537	55942530	ZNF713
chr1	124756715	124759293	4.14	-0.26	4.41	0.00204	0.0461	121519345	121568791	EMBP1
chr19	57117271	57118322	4.58	0.4	4.18	0.00205	0.0462	57119138	57128767	USP29
chr12	55391706	55392420	4.27	0.81	3.45	0.00206	0.0463	55400430	55401505	OR6C65
chr15	22277512	22278213	4.21	0.43	3.78	0.00208	0.0466	22278971	22282872	REREP3
chr20	48823010	48825007	4.69	1.53	3.16	0.00208	0.0466	48624252	48827999	PREX1
chr14	93718024	93718315	3.71	-0.26	3.97	0.0021	0.0469	93688993	93707343	UNC79
chr13	16235824	16238492	5.57	2.06	3.51	0.00211	0.047	18195297	18232024	FAM230C
chrUn_GL000218v1	72022	72631	4.35	-0.26	4.62	0.00211	0.047	51867	54893	LOC389834
chr15	77124708	77125828	4.18	-0.26	4.45	0.00212	0.0472	77046332	77083984	TSPAN3
chr22	11044697	11046753	4.2	-0.26	4.47	0.00214	0.0474	10939388	10961338	FRG1FP
chr19	58443085	58443739	4.73	0.68	4.05	0.00214	0.0474	58432814	58440153	ZNF132
chr3	123218536	123219781	4.15	-0.26	4.42	0.00216	0.0477	123208322	123274130	SEC22A
chr21	9941767	9942810	4.73	0.64	4.08	0.00218	0.0479	9781910	9816833	LINC01667
chr21	10351487	10352268	4.12	-0.26	4.38	0.00219	0.0479	10413477	10452529	BAGE2
chr1	124643236	124647574	3.7	-0.26	3.96	0.00221	0.0482	121519345	121568791	EMBP1
chr14	19926453	19928229	5.45	-0.26	5.71	0.00223	0.0484	19920582	19921659	OR4K5
chr21	10024387	10024889	4.15	-0.26	4.42	0.00223	0.0484	9781910	9816833	LINC01667
chr6	60239942	60241711	4.1	-0.26	4.36	0.00225	0.0487	61574328	61574402	MTRNR2L9
chr10	38807545	38808983	4.85	1.46	3.38	0.00226	0.0488	38696424	38697902	ACTR3BP5
chr1	143265499	143267944	7.95	3.4	4.55	0.00227	0.0489	143419625	143420207	LSP1P5
chr11	10509237	10509652	3.69	-0.26	3.95	0.00227	0.049	10507894	10509186	MTRNR2L8
chr15	75695956	75697279	4.75	1.52	3.23	0.00229	0.0493	75674322	75712848	CSPG4
chr17	80369163	80369765	4.47	1.18	3.29	0.00231	0.0496	80371651	80395253	RNF213

## Sheet: iPSC, WT v RNF20 Het1, WT down
Chromosome	Start	End	Mean Concentration of Reads in WT	Mean Concentration of Reads in RNF20 Het1	Fold	p-value	FDR	Gene Start	Gene End	SYMBOL
chr4	92449104	92459865	-0.25	7.88	-8.14	2.37e-10	1.13e-05	92304657	93772498	GRID2
chr4	61752280	61763601	-0.25	7.92	-8.17	3.83e-10	1.13e-05	61895741	62072437	ADGRL3
chr18	55554653	55564236	-0.25	7.72	-7.97	5.41e-10	1.13e-05	55222335	55553421	TCF4
chr15	57060831	57071540	-0.25	7.76	-8.01	6.38e-10	1.13e-05	57063748	57092023	TCF12
chr4	128271621	128279942	-0.25	7.42	-7.67	7.36e-10	1.13e-05	128269256	128273061	PGRMC2
chr12	14447696	14461137	-0.25	7.62	-7.88	1.02e-09	1.13e-05	14466110	14476154	ATF7IP
chr5	33461186	33467630	-0.25	7.35	-7.6	1.07e-09	1.13e-05	33466758	33468091	TARS1
chr5	25433799	25439695	-0.25	7.42	-7.67	1.19e-09	1.13e-05	25297734	25311370	LINC02211
chr8	123360269	123366734	-0.25	7.32	-7.57	1.67e-09	1.29e-05	123356100	123357621	ATAD2
chr21	25941499	25948524	-0.25	7.07	-7.33	3.4e-09	1.91e-05	25881514	25897983	APP
chr5	94252578	94259607	-0.25	6.92	-7.17	3.81e-09	1.91e-05	93621081	94111699	FAM172A
chr12	14437411	14443781	-0.25	6.92	-7.17	3.94e-09	1.91e-05	14423761	14498247	ATF7IP
chr3	143041616	143045921	-0.25	6.91	-7.17	4.04e-09	1.91e-05	143036879	143038206	U2SURP
chr1	8481168	8488850	-0.25	6.93	-7.19	5.1e-09	2.19e-05	8352406	8525939	RERE
chr1	32633987	32640480	-0.25	6.82	-7.07	5.8e-09	2.24e-05	32621830	32634061	ZBTB8OS
chr6	159750844	159755563	-0.25	6.82	-7.07	6.42e-09	2.37e-05	159684904	159745186	SOD2
chr8	131919978	131928153	-0.25	7	-7.25	7.63e-09	2.59e-05	131938225	132010895	EFR3A
chr9	71912208	71918159	-0.25	6.73	-6.99	7.99e-09	2.61e-05	71911802	71972843	C9orf85
chr11	93733341	93739503	0.69	7.06	-6.37	9.04e-09	2.85e-05	93733674	93733764	MIR1304
chr2	151435376	151441329	0.69	6.98	-6.29	9.5e-09	2.88e-05	151420225	151423760	RIF1
chr4	92485990	92494016	-0.25	7	-7.25	1e-08	2.94e-05	92304657	93772498	GRID2
chr2	174146317	174151172	-0.25	6.63	-6.88	1.13e-08	3.2e-05	174075409	174124315	OLA1
chr21	31694468	31701105	0.44	6.9	-6.46	1.24e-08	3.41e-05	31683995	31701823	SCAF4
chr2	99483717	99487133	-0.25	6.56	-6.81	1.46e-08	3.61e-05	99400475	99489973	REV1
chr13	20858600	20867969	1.09	7.55	-6.46	1.47e-08	3.61e-05	20868413	20902747	XPO4
chr14	92028224	92032695	-0.25	6.65	-6.9	1.49e-08	3.61e-05	92030541	92040017	TRIP11
chr1	211401046	211413704	0.94	7.11	-6.17	1.49e-08	3.61e-05	211399258	211432534	LINC00467
chr6	127303554	127311655	0.69	7.08	-6.39	1.58e-08	3.64e-05	127289780	127315860	ECHDC1
chr2	188409419	188414662	-0.25	6.56	-6.81	1.58e-08	3.64e-05	188139637	188384313	LINC01090
chr22	24328870	24333749	-0.25	6.5	-6.75	1.86e-08	3.93e-05	24304396	24321688	SPECC1L-ADORA2A
chr3	143016931	143022261	-0.25	6.48	-6.73	1.87e-08	3.93e-05	143016892	143027270	U2SURP
chr17	40388986	40397199	1.09	7.51	-6.41	1.9e-08	3.93e-05	40389562	40392101	TOP2A
chr2	231071940	231077583	-0.25	6.51	-6.76	2.13e-08	4.11e-05	231066904	231075566	PSMD1
chr5	146496726	146499997	0.13	6.42	-6.29	2.21e-08	4.11e-05	146499573	146503539	TCERG1
chr1	173483097	173488095	-0.25	6.44	-6.69	2.23e-08	4.11e-05	173417793	173489407	LOC101928673
chr11	76091050	76098412	-0.25	6.44	-6.69	2.35e-08	4.11e-05	76115900	76141660	UVRAG
chr11	103066275	103071370	-0.25	6.61	-6.86	2.4e-08	4.11e-05	103066459	103082839	DCUN1D5
chr7	105229483	105233879	-0.25	6.41	-6.67	2.43e-08	4.11e-05	105160301	105203732	SRPK2
chr8	15590891	15602592	0.44	6.56	-6.12	2.44e-08	4.11e-05	15623078	15651017	TUSC3
chr3	138749077	138754782	-0.25	6.48	-6.73	2.46e-08	4.11e-05	138652699	138759359	PIK3CB
chr7	2104991	2107944	0.13	6.4	-6.26	2.54e-08	4.15e-05	2014506	2107708	MAD1L1
chr2	188374421	188380551	-0.25	6.44	-6.69	2.64e-08	4.24e-05	188139637	188384313	LINC01090
chr11	77745682	77752691	0.44	6.58	-6.14	2.78e-08	4.38e-05	77702401	77764690	RSF1
chr15	89853825	89858724	0.13	6.42	-6.28	2.88e-08	4.45e-05	89837618	89852656	AP3S2
chr22	45746727	45750950	-0.25	6.39	-6.64	3.09e-08	4.65e-05	45740510	45744817	ATXN10
chr6	136255267	136260897	-0.25	6.45	-6.7	3.25e-08	4.76e-05	136248691	136250335	MTFR2
chr9	101389293	101397298	1.54	7.97	-6.43	3.3e-08	4.76e-05	101387633	101398618	MRPL50
chr10	21619463	21623566	-0.25	6.35	-6.6	3.39e-08	4.78e-05	21624667	21673486	MLLT10
chr1	180743506	180746455	-0.25	6.4	-6.65	3.43e-08	4.78e-05	180836652	180874055	XPR1
chr1	96793400	96799110	-0.25	6.4	-6.65	3.57e-08	4.79e-05	96806811	96812928	PTBP2
chr4	26432055	26436951	1.09	7.08	-5.99	3.59e-08	4.79e-05	26430146	26431174	RBPJ
chr5	33441877	33448627	0.94	6.99	-6.05	3.61e-08	4.79e-05	33441381	33448730	TARS1
chr7	122092488	122095293	-0.25	6.31	-6.57	3.78e-08	4.94e-05	122075647	122086153	AASS
chr2	207569757	207574370	-0.25	6.39	-6.65	4.18e-08	5.39e-05	207575286	207578065	CREB1
chr4	92559740	92563883	-0.25	6.29	-6.54	4.44e-08	5.64e-05	92304657	93772498	GRID2
chr5	25429459	25433030	-0.25	6.31	-6.56	4.73e-08	5.73e-05	25297734	25311370	LINC02211
chr6	125686176	125699130	1.58	7.96	-6.38	4.73e-08	5.73e-05	125701479	125720144	LINC02523
chr5	36945014	36953791	-0.25	6.47	-6.72	4.79e-08	5.73e-05	36954968	36975897	NIPBL
chr15	25369793	25377677	1.54	7.52	-5.98	4.95e-08	5.84e-05	25376243	25419459	SNHG14
chr10	63183909	63185668	-0.25	6.24	-6.49	5.02e-08	5.85e-05	63167221	63176555	JMJD1C
chr1	235225502	235229329	-0.25	6.29	-6.55	5.09e-08	5.85e-05	235180139	235234492	ARID4B
chr16	13353379	13357508	0.69	6.5	-5.81	5.4e-08	6.12e-05	13082380	13235293	SHISA9
chr19	20405684	20407891	0.9	6.72	-5.82	5.51e-08	6.17e-05	20397334	20409959	ZNF826P
chr17	67729058	67733090	0.44	6.5	-6.06	5.64e-08	6.23e-05	67736580	67737971	NOL11
chr8	117933405	117935869	-0.25	6.26	-6.51	6.19e-08	6.56e-05	117822465	118110414	EXT1
chr4	183508371	183512314	-0.25	6.19	-6.45	6.45e-08	6.58e-05	183506082	183510643	ING2
chr7	144195810	144205547	-0.25	6.35	-6.61	6.47e-08	6.58e-05	144195888	144232295	OR2A1-AS1
chr11	68745682	68748267	-0.25	6.37	-6.63	6.5e-08	6.58e-05	68744873	68747366	TESMIN
chr1	89859400	89863332	-0.25	6.23	-6.48	6.67e-08	6.67e-05	89846580	89933892	LRRC8D
chr6	156921867	156924676	-0.25	6.3	-6.56	7.01e-08	6.82e-05	156935471	157152404	ARID1B
chr11	19847985	19852054	0.94	6.75	-5.81	7.06e-08	6.82e-05	19813718	19832601	NAV2
chr9	92058418	92065530	0.44	6.47	-6.03	7.17e-08	6.82e-05	92000087	92080076	SPTLC1
chr4	152514804	152521097	-0.25	6.18	-6.43	7.54e-08	7e-05	152411160	152535191	FBXW7
chr12	45798222	45805182	-0.25	6.14	-6.39	7.57e-08	7e-05	45836761	45908040	ARID2
chr4	92587019	92591268	-0.25	6.32	-6.58	7.69e-08	7.03e-05	92822949	93112247	GRID2
chr9	71760798	71768216	-0.25	6.18	-6.43	7.91e-08	7.15e-05	71683985	71768386	CEMIP2
chr12	14471542	14476377	-0.25	6.17	-6.42	8.32e-08	7.4e-05	14478336	14481906	ATF7IP
chr4	48673502	48679542	-0.25	6.4	-6.65	8.36e-08	7.4e-05	48620657	48681171	FRYL
chr3	113724338	113727758	-0.25	6.26	-6.52	8.57e-08	7.5e-05	113721760	113724597	NAA50
chr10	86900864	86903537	-0.25	6.11	-6.37	8.76e-08	7.6e-05	86943871	86944571	MMRN2
chr1	174962958	174966654	-0.25	6.14	-6.39	9.06e-08	7.7e-05	174964768	174990485	RABGAP1L
chr7	26203814	26212609	2.04	8.03	-5.99	9.55e-08	7.91e-05	26206036	26208476	CBX3
chr6	149385342	149390178	-0.25	6.1	-6.35	9.58e-08	7.91e-05	149397692	149409617	TAB2
chr6	157027455	157032192	-0.25	6.09	-6.34	9.7e-08	7.92e-05	157030306	157141277	ARID1B
chr7	135446914	135453510	1.41	7.02	-5.61	1.02e-07	8.22e-05	135384290	135438331	CNOT4
chr4	39581670	39583741	-0.25	6.11	-6.36	1.08e-07	8.65e-05	39551610	39583958	SMIM14
chr2	219566286	219568990	-0.25	6.17	-6.42	1.12e-07	8.85e-05	219569162	219575053	INHA
chr1	147578064	147581699	0.72	6.46	-5.74	1.12e-07	8.85e-05	147600196	147611693	BCL9
chr20	25431618	25433803	-0.25	6.07	-6.33	1.22e-07	9.49e-05	25443024	25452628	GINS1
chr10	96524476	96526897	0.13	6.11	-5.98	1.23e-07	9.5e-05	96522277	96528173	TM9SF3
chr2	152663098	152668512	-0.25	6.15	-6.4	1.24e-07	9.51e-05	152663131	152663855	PRPF40A
chr10	11997718	12001278	-0.25	6.11	-6.36	1.35e-07	0.000101	11920022	12035897	UPF2
chr6	47563312	47574284	1.4	7.24	-5.84	1.35e-07	0.000101	47576513	47579906	CD2AP
chr1	223026461	223029700	-0.25	6.07	-6.32	1.41e-07	0.000103	222928441	222943550	DISP1
chr10	35468789	35470784	-0.25	6.01	-6.26	1.55e-07	0.000112	35434111	35501661	CCNY
chr4	94459605	94471684	0.46	6.17	-5.71	1.64e-07	0.000117	94455267	94549986	PDLIM5
chr5	14673628	14682314	0.94	6.45	-5.52	1.66e-07	0.000117	14678756	14690151	OTULIN
chr4	82891892	82900312	1.66	7.64	-5.98	1.68e-07	0.000117	82897793	82900502	THAP9-AS1
chr18	4332995	4337043	0.72	6.28	-5.56	1.69e-07	0.000117	4264633	4295405	DLGAP1-AS5
chr1	246908328	246910884	-0.25	6.03	-6.28	1.7e-07	0.000117	246839098	246899480	AHCTF1
chr2	60485024	60487348	-0.25	5.96	-6.22	1.73e-07	0.000118	60452649	60484465	BCL11A
chr7	141141682	141143700	0.13	5.97	-5.84	1.77e-07	0.00012	141074393	141212764	TMEM178B
chr1	170533125	170536019	-0.25	5.96	-6.21	1.81e-07	0.000121	170536275	170539659	GORAB
chr2	147964531	147969169	-0.25	6.13	-6.38	1.83e-07	0.000121	147951448	147972829	ORC4
chr6	24778176	24783018	-0.25	6.19	-6.44	1.87e-07	0.000123	24776866	24784119	GMNN
chr15	49019868	49021669	-0.25	5.93	-6.18	2.02e-07	0.00013	49016917	49019647	SECISBP2L
chr22	40598079	40601810	-0.25	5.97	-6.22	2.02e-07	0.00013	40519128	40636649	MRTFA
chr17	20875061	20877939	0.72	6.24	-5.52	2.07e-07	0.000133	20868547	20932818	CCDC144NL-AS1
chr4	119610127	119616668	0.9	6.38	-5.47	2.12e-07	0.000134	119498541	119627633	PDE5A
chr12	112365950	112367748	-0.25	5.95	-6.2	2.16e-07	0.000136	112160188	112382092	HECTD4
chr1	193205437	193209882	0.9	6.46	-5.56	2.35e-07	0.000147	193178730	193186613	B3GALT2
chr1	39129951	39132381	-0.25	5.91	-6.16	2.37e-07	0.000147	39105429	39254648	MACF1
chr1	193148687	193151980	-0.25	5.89	-6.14	2.41e-07	0.000147	193136503	193136583	MIR1278
chr1	223031524	223033836	-0.25	6	-6.25	2.41e-07	0.000147	223123488	223132579	TLR5
chr18	79086800	79092390	0.13	5.91	-5.78	2.51e-07	0.000151	79087307	79277268	ATP9B
chr1	111148897	111152425	-0.25	5.98	-6.23	2.51e-07	0.000151	111147677	111184988	CEPT1
chr5	106952665	106956811	-0.25	5.89	-6.14	2.52e-07	0.000151	106815205	106980869	LINC01950
chr1	35460804	35463456	-0.25	5.88	-6.13	2.55e-07	0.000151	35434105	35454707	KIAA0319L
chr3	15690597	15693411	0.21	5.91	-5.7	2.7e-07	0.000158	15689840	15696231	ANKRD28
chr2	63599843	63602421	-0.25	6.02	-6.27	2.84e-07	0.000165	63597548	63600052	MDH1
chr1	180395119	180398161	-0.25	5.96	-6.21	2.88e-07	0.000166	180286983	180413388	ACBD6
chr1	64524157	64528446	-0.25	5.96	-6.21	2.89e-07	0.000166	64505915	64693053	CACHD1
chr21	42703243	42705089	0.44	5.97	-5.53	2.94e-07	0.000168	42686197	42762139	PDE9A
chr7	130569782	130572244	-0.25	5.87	-6.12	3.05e-07	0.000173	130506524	130564511	COPG2
chr9	122297709	122299304	-0.25	5.84	-6.09	3.09e-07	0.000173	122270864	122323461	MRRF
chr2	119865879	119877059	1.26	6.94	-5.68	3.15e-07	0.000174	119877323	119934960	PTPN4
chr12	104310982	104313236	0.83	6.21	-5.37	3.16e-07	0.000174	104309851	104348483	TXNRD1
chr6	145807000	145809563	-0.25	5.95	-6.2	3.17e-07	0.000174	145793502	145814795	FBXO30
chr17	8560533	8564738	1.56	6.64	-5.08	3.29e-07	0.000179	8546626	8554289	MYH10
chr6	158287561	158290299	0.44	6.01	-5.57	3.31e-07	0.000179	158312465	158511828	TULP4
chr16	84730992	84733396	-0.25	5.95	-6.21	3.41e-07	0.000184	84733138	84744780	USP10
chr7	141555077	141556646	-0.25	5.82	-6.08	3.47e-07	0.000184	141555439	141615880	AGK
chr2	30507985	30510845	0.79	6.06	-5.27	3.48e-07	0.000184	30447403	30562193	LCLAT1
chr2	168479666	168483434	-0.25	6.15	-6.4	3.48e-07	0.000184	168456249	168775134	CERS6
chr1	100271976	100275119	-0.25	5.9	-6.16	3.57e-07	0.000187	100266289	100266929	RTCA
chr9	125775727	125778757	0.69	6.16	-5.47	3.63e-07	0.000189	125750474	125966412	PBX3
chr6	38035143	38039975	0.44	6	-5.56	3.7e-07	0.00019	38061611	38062660	ZFAND3
chr6	157003049	157007134	-0.25	5.81	-6.06	3.72e-07	0.00019	157022286	157208694	ARID1B
chr20	50855422	50858593	-0.25	5.85	-6.1	3.72e-07	0.00019	50888916	50905558	ADNP
chr4	159005	162379	-0.25	5.9	-6.15	3.74e-07	0.00019	124538	162701	ZNF718
chr20	21350795	21354887	-0.25	5.99	-6.24	3.75e-07	0.00019	21395365	21397526	NKX2-4
chr11	9586471	9589496	-0.25	5.87	-6.13	3.83e-07	0.000192	9586714	9593457	WEE1
chr10	92627034	92629781	-0.25	5.88	-6.13	3.96e-07	0.000198	92593130	92655395	KIF11
chr4	145863261	145869354	-0.25	5.89	-6.14	3.98e-07	0.000198	145760765	145862006	ZNF827
chr1	220020634	220024214	0.44	5.92	-5.48	4.01e-07	0.000198	219997176	220007365	EPRS1
chr8	75272576	75274668	-0.25	5.91	-6.16	4.17e-07	0.000203	75223404	75278461	CASC9
chr12	65169781	65171349	-0.25	5.78	-6.03	4.2e-07	0.000203	65169583	65248355	LEMD3
chr4	139383000	139385879	0.72	6.2	-5.48	4.21e-07	0.000203	139384836	139386547	NAA15
chr12	45782279	45790032	1.66	7.32	-5.66	4.33e-07	0.000208	45836761	45908040	ARID2
chr10	19822836	19826245	-0.25	6.05	-6.3	4.38e-07	0.000209	19816432	20289856	PLXDC2
chr1	117065241	117067294	-0.25	5.87	-6.13	4.4e-07	0.000209	117060362	117075444	TTF2
chr3	47850546	47852073	-0.25	5.82	-6.07	4.59e-07	0.000217	47849555	47849629	MIR1226
chr11	43376046	43379504	1.44	6.92	-5.48	4.68e-07	0.00022	43379258	43391788	TTC17
chr1	212888433	212903763	2.59	8.6	-6.01	4.78e-07	0.000222	212883409	212895394	FLVCR1
chr11	63645750	63647729	0.13	5.8	-5.67	4.81e-07	0.000222	63624087	63671376	ATL3
chr16	15123919	15126548	-0.25	5.81	-6.06	4.91e-07	0.000225	15110791	15125948	PKD1P6-NPIPP1
chr3	41200082	41202677	-0.25	5.72	-5.98	5.11e-07	0.000232	41200110	41239904	CTNNB1
chr17	21128136	21133766	1.54	7.08	-5.54	5.4e-07	0.000244	21126964	21191445	DHRS7B
chr2	206295044	206297324	-0.25	5.7	-5.95	5.52e-07	0.000248	206292063	206314424	ZDBF2
chr6	135036559	135040730	1.06	6.34	-5.28	5.64e-07	0.000251	134964629	135027196	HBS1L
chr18	62811814	62814231	-0.25	5.77	-6.03	5.64e-07	0.000251	62832160	62889665	PHLPP1
chr10	86917754	86921366	0.83	6.12	-5.29	5.72e-07	0.000253	86943871	86944571	MMRN2
chr12	12497896	12503372	1.54	6.97	-5.44	6.1e-07	0.000268	12477886	12506187	DUSP16
chr10	87910340	87913878	-0.25	5.74	-5.99	6.21e-07	0.000271	87925523	87933487	PTEN
chr8	81829961	81833029	0.69	6.25	-5.56	6.22e-07	0.000271	81814645	81823850	SNX16
chr15	59332496	59334154	-0.25	5.72	-5.97	6.5e-07	0.00028	59227483	59372527	MYO1E
chr17	5355083	5359399	0.9	6.14	-5.24	6.51e-07	0.00028	5354401	5361629	RABEP1
chr10	68062993	68064046	-0.25	5.69	-5.94	6.57e-07	0.00028	67922484	68073097	HERC4
chr5	140523305	140526022	0.99	6.12	-5.13	6.58e-07	0.00028	140524183	140539848	ANKHD1
chr1	108694541	108700652	1.27	6.7	-5.43	6.6e-07	0.00028	108697700	108699385	PRPF38B
chr4	137528910	137531155	-0.25	5.73	-5.98	6.67e-07	0.000282	137521507	137529576	PCDH18
chr20	5178631	5180079	-0.25	5.72	-5.97	6.83e-07	0.000287	5176102	5191354	CDS2
chr2	53889978	53892413	-0.25	5.81	-6.06	6.95e-07	0.00029	53887417	53888320	PSME4
chr5	72966001	72968279	-0.25	6	-6.25	6.98e-07	0.00029	72956071	73038123	FCHO2
chr4	39602950	39604554	-0.25	5.81	-6.06	6.99e-07	0.00029	39551610	39583958	SMIM14
chr1	66932562	66939924	0.83	6.15	-5.32	7.07e-07	0.000292	66932652	66959750	MIER1
chr2	62715103	62717968	1.03	6.2	-5.16	7.32e-07	0.000301	62707192	63045500	EHBP1
chr3	38187011	38188986	-0.25	5.64	-5.89	7.4e-07	0.000302	38165647	38230693	OXSR1
chr7	149132231	149134729	-0.25	5.67	-5.93	7.51e-07	0.000305	149126416	149182802	ZNF398
chr1	164596280	164598508	0.21	6.01	-5.8	7.52e-07	0.000305	164590350	164847101	PBX1
chr12	76049419	76052350	-0.25	5.64	-5.89	7.66e-07	0.000306	76047634	76049721	NAP1L1
chr3	58021934	58024135	-0.25	5.74	-5.99	7.73e-07	0.000306	58008400	58172251	FLNB
chr9	77945523	77949003	1.26	6.46	-5.2	7.73e-07	0.000306	77797528	78030604	GNAQ
chr10	95261565	95263588	-0.25	5.76	-6.01	7.74e-07	0.000306	95263876	95273406	PDLIM1
chr12	45810853	45815162	-0.25	5.66	-5.91	7.8e-07	0.000306	45836761	45908040	ARID2
chr4	173173778	173181005	1.09	6.33	-5.24	7.82e-07	0.000306	173131928	173169652	LOC101930370
chr5	50753235	50757178	-0.25	6.2	-6.45	7.83e-07	0.000306	50667893	50842342	PARP8
chr1	81854162	81857643	-0.25	5.65	-5.9	7.84e-07	0.000306	81800397	81992422	ADGRL2
chr3	196052154	196054058	-0.25	5.78	-6.03	8.39e-07	0.000325	196027183	196055214	TFRC
chr4	41997909	42001592	-0.25	6.11	-6.36	8.49e-07	0.000325	41990530	42090461	SLC30A9
chr5	14261125	14263845	-0.25	5.63	-5.88	8.52e-07	0.000325	14290977	14297513	TRIO
chr2	135965807	135969326	-0.25	5.67	-5.92	8.57e-07	0.000325	135943386	135980551	DARS1
chr2	55574809	55576894	-0.25	5.92	-6.17	8.57e-07	0.000325	55568029	55573718	PPP4R3B
chr1	39274460	39276968	-0.25	5.66	-5.91	8.57e-07	0.000325	39268527	39357775	MACF1
chr1	47296265	47297848	0.15	5.71	-5.57	8.74e-07	0.00033	47299777	47301725	STIL
chr11	73793891	73795515	-0.25	5.7	-5.95	8.82e-07	0.000332	73787957	73864607	MRPL48
chr12	125084073	125085181	-0.25	5.61	-5.86	9.26e-07	0.000347	125091013	125107154	AACS
chr13	20064422	20067701	-0.25	5.72	-5.97	9.39e-07	0.00035	20066578	20083757	ZMYM2
chr1	232147775	232149811	-0.25	5.78	-6.03	9.44e-07	0.00035	231925834	231945233	DISC1-IT1
chr11	14343495	14347879	1.09	6.3	-5.21	9.48e-07	0.00035	14279397	14342094	RRAS2
chr15	40978590	40980211	-0.25	5.59	-5.84	9.78e-07	0.00036	40979911	40983219	INO80
chr4	143195709	143197337	-0.25	5.62	-5.87	9.87e-07	0.000361	143185694	143223830	USP38
chr7	24365991	24368422	-0.25	5.86	-6.11	9.89e-07	0.000361	24285107	24291824	NPY
chr15	48166889	48171235	0.9	6.32	-5.42	1.01e-06	0.000366	48162695	48169910	MYEF2
chr1	155373094	155375597	-0.25	5.68	-5.93	1.03e-06	0.000373	155370147	155370868	ASH1L
chr6	107902932	107907972	1.66	7.25	-5.59	1.05e-06	0.000377	107893580	107902900	SEC63
chr15	63791343	63793606	-0.25	5.58	-5.83	1.05e-06	0.000377	63775564	63833885	HERC1
chr15	82367606	82372453	0.15	5.63	-5.48	1.07e-06	0.000381	82355142	82414738	UBE2Q2P2
chr3	98580620	98584334	0.9	5.99	-5.09	1.08e-06	0.000382	98521133	98585498	CLDND1
chr3	177047630	177050600	-0.25	5.6	-5.86	1.12e-06	0.000394	177020592	177051535	TBL1XR1
chr18	13023648	13025521	0.21	5.67	-5.47	1.12e-06	0.000394	13029787	13124995	CEP192
chr1	178248784	178251208	-0.25	5.65	-5.9	1.13e-06	0.000394	178341471	178484147	RASAL2
chr3	150428811	150430851	0.44	5.71	-5.27	1.13e-06	0.000394	150423039	150423451	TSC22D2
chr10	103106650	103111257	1.09	6.24	-5.15	1.15e-06	0.0004	103097972	103106650	NT5C2
chr8	117950378	117954924	1.4	6.58	-5.17	1.17e-06	0.000403	117822465	118110414	EXT1
chr1	8715282	8716539	-0.25	5.54	-5.79	1.18e-06	0.000406	8656193	8703219	RERE
chr17	32871123	32872982	-0.25	5.55	-5.8	1.19e-06	0.000409	32492522	32877124	MYO1D
chr2	53937393	53940436	-0.25	5.56	-5.81	1.26e-06	0.000427	53932056	53933169	PSME4
chr2	23885935	23887994	0.13	5.57	-5.44	1.27e-06	0.00043	23856009	23867887	ATAD2B
chr10	20085694	20089267	-0.25	5.6	-5.86	1.28e-06	0.000431	20043320	20280357	PLXDC2
chr11	94658549	94661173	-0.25	5.76	-6.01	1.29e-06	0.000432	94617789	94621113	PIWIL4
chr18	35476590	35479466	0.69	6.02	-5.33	1.3e-06	0.000435	35468711	35487470	INO80C
chr18	79092988	79096680	1.06	6.29	-5.22	1.32e-06	0.000441	79096513	79378141	ATP9B
chr17	43147139	43149886	0.9	5.99	-5.08	1.34e-06	0.000443	43148705	43160009	LOC101929767
chr5	32375545	32377156	-0.25	5.52	-5.77	1.35e-06	0.000443	32354351	32380424	ZFR
chr1	110399790	110402594	-0.25	5.54	-5.79	1.35e-06	0.000443	110401257	110406425	LAMTOR5
chr8	102255651	102258642	-0.25	5.79	-6.05	1.36e-06	0.000445	102253946	102261986	UBR5
chr1	156979445	156981804	0.72	5.91	-5.19	1.38e-06	0.000448	156967911	156971825	ARHGEF11
chr10	19878533	19880333	-0.25	5.55	-5.8	1.42e-06	0.000451	19816432	20289856	PLXDC2
chr1	165682168	165683486	0.13	5.54	-5.41	1.42e-06	0.000451	165668674	165680635	ALDH9A1
chr2	1152444	1154881	-0.25	5.6	-5.85	1.43e-06	0.000451	1163247	1220057	SNTG2
chr12	55827115	55829120	-0.25	5.52	-5.78	1.43e-06	0.000451	55757275	55827546	DNAJC14
chr2	169564834	169567135	0.69	5.99	-5.3	1.43e-06	0.000451	169560271	169563390	FASTKD1
chr12	45779567	45781833	-0.25	5.51	-5.76	1.43e-06	0.000451	45729916	45893918	ARID2
chr3	65893768	65901118	1.82	7.26	-5.44	1.43e-06	0.000451	65893816	65925297	MAGI1-AS1
chr17	47163011	47165030	0.46	5.77	-5.31	1.45e-06	0.000454	47142428	47169977	CDC27
chr4	91569169	91571111	0.44	5.84	-5.4	1.46e-06	0.000455	91085950	91601913	CCSER1
chr12	14372701	14374865	-0.25	5.6	-5.85	1.47e-06	0.000455	14367373	14424224	ATF7IP
chr8	97717417	97718695	-0.25	5.52	-5.77	1.47e-06	0.000455	97706412	97719087	MTDH
chr9	82866879	82868418	-0.25	5.73	-5.98	1.48e-06	0.000456	82979590	83063142	RASEF
chr5	159279366	159281666	0.44	5.65	-5.21	1.5e-06	0.000461	159274542	159286036	UBLCP1
chr5	109691786	109696878	0.69	5.9	-5.21	1.51e-06	0.000461	109689366	109867178	MAN2A1
chr3	61892095	61894304	-0.25	5.92	-6.17	1.53e-06	0.000465	62217583	62293551	PTPRG
chr16	75375547	75379473	1.52	6.22	-4.7	1.55e-06	0.00047	75293906	75363035	CFDP1
chr7	32538095	32540987	1.09	6.11	-5.02	1.56e-06	0.000473	32543255	32588711	AVL9
chr10	110291247	110293087	-0.25	5.65	-5.9	1.59e-06	0.000479	110298677	110304131	SMNDC1
chr17	5283523	5287470	-0.25	5.49	-5.75	1.61e-06	0.000483	5282487	5383223	RABEP1
chr1	86880207	86886398	1.66	6.85	-5.19	1.61e-06	0.000483	86863517	86903352	SELENOF
chr1	34169260	34170845	0.72	5.86	-5.14	1.62e-06	0.000484	34166883	34219131	C1orf94
chr2	188305204	188307041	-0.25	5.53	-5.78	1.64e-06	0.000484	188297492	188297588	MIR561
chr16	70247916	70251888	-0.25	5.86	-6.12	1.64e-06	0.000484	70246778	70251940	EXOSC6
chr11	123160950	123162172	-0.25	5.52	-5.78	1.64e-06	0.000484	123069872	123195248	CLMP
chr6	93811918	93816047	-0.25	5.63	-5.88	1.65e-06	0.000484	93720163	93745615	TSG1
chr8	70384781	70386491	-0.25	5.53	-5.78	1.66e-06	0.000484	70112070	70402079	NCOA2
chr8	9900874	9902210	0.21	5.55	-5.35	1.66e-06	0.000484	9900058	9901937	LINC00599
chr15	57481302	57483252	-0.25	5.63	-5.88	1.71e-06	0.000497	57376505	57550727	CGNL1
chr8	80116458	80119574	-0.25	5.46	-5.71	1.71e-06	0.000497	80034872	80080831	TPD52
chr8	94737555	94738749	-0.25	5.49	-5.74	1.72e-06	0.000497	94739520	94744983	DPY19L4
chr2	88571525	88578551	1.77	7.09	-5.32	1.73e-06	0.000497	88570920	88575408	EIF2AK3
chr17	60075718	60078185	-0.25	5.55	-5.8	1.77e-06	0.000507	60069809	60076185	HEATR6
chr6	57333123	57335557	-0.25	5.56	-5.81	1.8e-06	0.000515	57317630	57646850	PRIM2
chr1	32757471	32759066	-0.25	5.54	-5.79	1.82e-06	0.000518	32754021	32774970	KIAA1522
chr2	111830069	111833287	-0.25	5.47	-5.72	1.83e-06	0.000518	111802533	111821756	ANAPC1
chr4	119233740	119235531	-0.25	5.47	-5.72	1.83e-06	0.000518	119239216	119295517	USP53
chr12	111544866	111546176	-0.25	5.52	-5.77	1.88e-06	0.000531	111452463	111552306	ATXN2
chr19	1997942	1999653	0.15	5.54	-5.4	1.89e-06	0.000531	1987208	1997424	BTBD2
chr1	51509804	51512164	0.46	5.6	-5.14	1.93e-06	0.000542	51461123	51519227	EPS15
chr16	71759294	71763676	1.66	6.83	-5.17	1.96e-06	0.000548	71758402	71758487	SNORD71
chr12	32592918	32600412	1.98	7.43	-5.45	1.98e-06	0.000551	32582379	32644751	FGD4
chr14	35141777	35144886	-0.25	6.26	-6.51	1.99e-06	0.000553	35122759	35273485	PRORP
chr7	639188	641307	0.15	5.73	-5.59	2.03e-06	0.000561	603185	608482	LOC101926963
chr1	196554346	196557630	0.13	5.55	-5.41	2.03e-06	0.000561	196582413	196582481	MIR4735
chr2	36376326	36377637	-0.25	5.43	-5.68	2.05e-06	0.000563	36356471	36378903	CRIM1
chr1	150285186	150286805	0.13	5.65	-5.51	2.05e-06	0.000563	150283534	150286633	CIART
chr2	174215772	174218486	0.69	5.74	-5.05	2.08e-06	0.000569	174082010	174217946	OLA1
chr18	46224528	46227971	-0.25	5.65	-5.91	2.1e-06	0.000573	46174086	46232936	C18orf25
chr4	152465043	152468602	-0.25	5.51	-5.76	2.11e-06	0.000574	152489327	152489416	MIR3140
chr6	166975502	166977623	-0.25	5.5	-5.75	2.13e-06	0.000575	166933375	166957191	RNASET2
chr4	145879572	145884374	1.44	6.44	-5	2.14e-06	0.000575	145757664	145885769	ZNF827
chr5	157807177	157811785	-0.25	5.51	-5.76	2.16e-06	0.000575	157791620	157806012	CLINT1
chr13	91347771	91349325	-0.25	5.81	-6.06	2.16e-06	0.000575	91347820	91352402	MIR17HG
chr7	6046617	6048267	-0.25	5.55	-5.8	2.16e-06	0.000575	6040959	6046902	EIF2AK1
chr17	5384457	5385877	-0.25	5.44	-5.69	2.16e-06	0.000575	5386104	5387132	NUP88
chr1	180653080	180655601	-0.25	5.42	-5.68	2.17e-06	0.000575	180632032	180886126	XPR1
chr16	11884209	11885992	0.9	6.06	-5.16	2.18e-06	0.000575	11880225	11886904	GSPT1
chr5	147952725	147955136	-0.25	5.52	-5.77	2.19e-06	0.000577	147901308	147906538	C5orf46
chr11	86320335	86324096	1.09	6.06	-4.97	2.23e-06	0.000585	86306333	86345662	HIKESHI
chr5	14236832	14240568	-0.25	5.6	-5.85	2.24e-06	0.000586	14290977	14297513	TRIO
chr1	225778119	225783120	1.26	6.52	-5.26	2.25e-06	0.000586	225777935	225789524	SRP9
chr12	62778433	62779555	-0.25	5.53	-5.79	2.3e-06	0.000595	62689750	62788484	PPM1H
chr7	20080402	20082578	0.69	5.89	-5.2	2.31e-06	0.000596	19931071	20125162	LOC101927668
chr6	111765711	111767917	0.9	6.06	-5.16	2.36e-06	0.000607	111702878	111759925	FYN
chr1	35467686	35469550	-0.25	5.39	-5.64	2.4e-06	0.000613	35438542	35470906	KIAA0319L
chr2	127072223	127073973	-0.25	5.62	-5.87	2.48e-06	0.000631	127050382	127064928	BIN1
chr12	112325795	112327988	-0.25	5.46	-5.72	2.5e-06	0.000633	112249557	112273793	HECTD4
chr1	15826630	15828416	-0.25	5.45	-5.7	2.51e-06	0.000635	15807169	15809348	UQCRHL
chr12	7796081	7797881	0.69	5.71	-5.02	2.53e-06	0.000637	7789615	7795095	NANOG
chr2	224519997	224521783	-0.25	5.38	-5.63	2.58e-06	0.000649	224505749	224511411	CUL3
chr10	95240263	95242288	-0.25	5.51	-5.76	2.64e-06	0.000659	95237940	95238848	PDLIM1
chr11	77465222	77467453	-0.25	5.53	-5.78	2.64e-06	0.000659	77358841	77473495	PAK1
chr10	34535424	34538729	-0.25	5.43	-5.68	2.71e-06	0.000672	34312264	34426731	PARD3
chr17	27497322	27498825	0.69	5.65	-4.96	2.75e-06	0.000681	27472013	27582935	KSR1
chr12	19337263	19339183	-0.25	5.43	-5.69	2.77e-06	0.000683	19322518	19376397	PLEKHA5
chr1	90011756	90014146	-0.25	5.53	-5.78	2.78e-06	0.000683	89995137	90035531	ZNF326
chr3	138565043	138568663	1.21	5.86	-4.65	2.78e-06	0.000683	138536919	138591956	CEP70
chr6	100817759	100819786	0.69	5.77	-5.08	2.79e-06	0.000683	100848004	100881301	ASCC3
chr8	42400837	42402355	-0.25	5.39	-5.65	2.8e-06	0.000683	42403032	42405415	VDAC3
chr11	116965579	116968476	0.69	5.67	-4.98	2.82e-06	0.000687	116893845	116957064	SIK3
chr2	39415423	39416912	-0.25	5.45	-5.7	2.86e-06	0.000694	39436530	39601410	MAP4K3-DT
chr22	40302344	40304456	-0.25	5.54	-5.79	2.9e-06	0.0007	40300856	40301495	TNRC6B
chr12	19291914	19292676	-0.25	5.39	-5.65	2.93e-06	0.000705	19283637	19320585	PLEKHA5
chr9	111421390	111424320	1.09	5.97	-4.87	2.94e-06	0.000707	111361886	111371788	ECPAS
chr1	64787258	64788988	-0.25	5.35	-5.6	2.97e-06	0.000709	64778066	64816509	RAVER2
chr4	75728359	75729848	-0.25	5.34	-5.6	2.99e-06	0.000709	75724598	75814286	USO1
chr11	110272423	110276433	-0.25	5.58	-5.83	2.99e-06	0.000709	110258114	110264824	RDX
chr6	152984869	152987544	1.06	6.12	-5.06	3e-06	0.000709	152970529	152983579	FBXO5
chr4	91624147	91625660	1.06	6.03	-4.97	3e-06	0.000709	91085950	91601913	CCSER1
chr4	145095221	145097122	0.94	5.84	-4.91	3e-06	0.000709	145064572	145097382	ANAPC10
chr1	20751916	20756561	1.9	6.45	-4.54	3.12e-06	0.000731	20745592	20750251	HP1BP3
chr8	95026681	95029600	1.21	5.87	-4.65	3.12e-06	0.000731	95025068	95076168	NDUFAF6
chr1	214432360	214433889	-0.25	5.47	-5.72	3.16e-06	0.000737	214372246	214376406	PTPN14
chr6	107898116	107900628	1.29	6.14	-4.85	3.19e-06	0.000742	107893580	107902900	SEC63
chr7	112469609	112475351	1.77	7.02	-5.24	3.23e-06	0.00075	112468086	112481017	IFRD1
chr12	1118899	1120938	-0.25	5.35	-5.6	3.26e-06	0.000755	1115624	1141740	ERC1
chr3	149946875	149949433	-0.25	5.32	-5.57	3.31e-06	0.000764	149959957	149961374	RNF13
chr12	79575785	79579717	-0.25	5.58	-5.83	3.4e-06	0.000782	79584879	79596534	PAWR
chr15	63229244	63231732	-0.25	5.32	-5.57	3.4e-06	0.000782	63189606	63267776	RAB8B
chr22	39223093	39224144	-0.25	5.37	-5.63	3.43e-06	0.000784	39224935	39240909	PDGFB
chr7	151471767	151474681	-0.25	5.42	-5.67	3.44e-06	0.000784	151470299	151471803	RHEB
chr7	20024251	20025095	-0.25	5.34	-5.59	3.48e-06	0.000788	19918992	20002922	LOC101927668
chr1	220789147	220790600	0.44	5.48	-5.04	3.51e-06	0.000792	220790955	220791664	2021-03-01
chr21	25760104	25761683	-0.25	5.32	-5.58	3.51e-06	0.000792	25724480	25735673	ATP5PF
chr4	55530388	55537862	2.4	7.25	-4.85	3.53e-06	0.000794	55434823	55545932	CLOCK
chr12	116160601	116161517	-0.25	5.31	-5.56	3.58e-06	0.000802	116148560	116148654	MIR620
chr1	21120201	21121743	-0.25	5.41	-5.67	3.6e-06	0.000804	21064531	21111610	EIF4G3
chr19	20636722	20638417	0.44	5.49	-5.05	3.61e-06	0.000804	20621367	20661507	ZNF626
chr5	10246819	10248246	-0.25	5.37	-5.62	3.66e-06	0.000815	10227558	10249885	ATPSCKMT
chr9	97220899	97222592	-0.25	5.38	-5.64	3.8e-06	0.000844	97156570	97221235	ANKRD18CP
chr9	26886216	26892155	2.35	7.25	-4.91	3.85e-06	0.000849	26869926	26887478	CAAP1
chr6	93833514	93835334	0.44	5.55	-5.11	3.85e-06	0.000849	93720163	93745615	TSG1
chr3	169983558	169987461	1.44	6.45	-5.01	3.88e-06	0.000851	169985129	169992721	SEC62
chr4	92467482	92485184	2.52	8.35	-5.83	3.89e-06	0.000852	92304657	93772498	GRID2
chr2	167419441	167420792	0.5	5.43	-4.94	3.93e-06	0.000858	167248682	167259749	XIRP2
chr4	139119471	139121690	0.55	5.57	-5.01	4.03e-06	0.000878	139057717	139139476	ELF2
chr8	114289512	114291548	-0.25	5.52	-5.77	4.08e-06	0.000887	113018776	113436939	CSMD3
chr19	21407059	21408425	-0.25	5.44	-5.69	4.1e-06	0.000889	21405278	21422949	ZNF493
chr9	97158120	97159347	-0.25	5.35	-5.6	4.14e-06	0.000894	97195351	97197687	ANKRD18CP
chr10	90887789	90889905	1.49	5.98	-4.48	4.14e-06	0.000894	90894773	90905638	RPP30
chr1	243210923	243214533	-0.25	5.44	-5.69	4.25e-06	0.000914	243125164	243200814	CEP170
chr19	49839696	49841530	0.15	5.39	-5.24	4.28e-06	0.000917	49832884	49836979	MED25
chr11	73804253	73805418	0.15	5.39	-5.24	4.28e-06	0.000917	73808308	73845137	MRPL48
chr9	81688042	81689407	-0.25	5.3	-5.55	4.36e-06	0.000928	81620454	81688448	TLE1
chr7	109579437	109582472	0.69	5.57	-4.88	4.37e-06	0.000928	109959218	109960184	EIF3IP1
chr5	31532790	31536535	1.57	6.39	-4.81	4.47e-06	0.000945	31532316	31545714	C5orf22
chr3	172244826	172247085	-0.25	5.26	-5.51	4.49e-06	0.000945	172306936	172310927	FNDC3B
chr5	77707403	77712129	-0.25	5.92	-6.17	4.51e-06	0.000945	77691241	77708613	TBCA
chr19	7273759	7275320	0.69	5.63	-4.94	4.51e-06	0.000945	7151971	7293866	INSR
chr4	55538433	55540191	-0.25	5.27	-5.53	4.52e-06	0.000945	55434823	55545932	CLOCK
chr17	49333992	49335202	0.44	5.47	-5.03	4.53e-06	0.000945	49361150	49367596	LOC102724596
chr4	152526716	152535886	1.66	6.99	-5.33	4.55e-06	0.000947	152411160	152535191	FBXW7
chr5	147504645	147507891	-0.25	5.77	-6.02	4.59e-06	0.000952	147472632	147509535	DPYSL3
chr4	150942725	150946835	-0.25	5.29	-5.54	4.59e-06	0.000952	150264853	151015224	LRBA
chr4	128101910	128103157	-0.25	5.31	-5.56	4.61e-06	0.000953	128122117	128222926	LARP1B
chr6	157320048	157322346	1.26	6.12	-4.87	4.62e-06	0.000953	157289386	157323601	TMEM242
chr20	39007035	39008752	-0.25	5.36	-5.62	4.63e-06	0.000953	39021873	39038646	DHX35
chr16	19572100	19574142	0.92	5.61	-4.69	4.66e-06	0.000957	19575098	19582085	VPS35L
chr11	76139668	76142361	-0.25	5.42	-5.67	4.71e-06	0.000964	76115900	76141660	UVRAG
chr2	10655325	10657183	-0.25	5.33	-5.58	4.74e-06	0.000967	10622023	10671690	NOL10
chr2	69350628	69354344	-0.25	5.46	-5.71	4.75e-06	0.000967	69350098	69363592	GFPT1
chr7	7221719	7223575	-0.25	5.29	-5.54	4.8e-06	0.000976	7234258	7248651	C1GALT1
chr12	45805794	45807152	-0.25	5.25	-5.51	4.83e-06	0.000978	45836761	45908040	ARID2
chr2	99317717	99319516	-0.25	5.43	-5.68	4.84e-06	0.000978	99284257	99304742	LYG1
chr4	166814063	166817803	-0.25	5.44	-5.69	4.84e-06	0.000978	166734147	167102557	SPOCK3
chr11	73699244	73700540	-0.25	5.37	-5.62	4.91e-06	0.000989	73660309	73661734	PLEKHB1
chr1	52143999	52146312	1.96	6.15	-4.19	4.95e-06	0.000995	52142374	52346515	ZFYVE9
chr10	68671178	68672456	-0.25	5.34	-5.6	4.99e-06	0.001	68721012	68742408	CCAR1
chr12	65196008	65199029	-0.25	5.5	-5.76	5.01e-06	0.001	65169583	65248355	LEMD3
chr15	82413450	82414826	-0.25	5.33	-5.58	5.04e-06	0.00101	82418651	82434235	GOLGA6L9
chr9	131933896	131935884	0.94	5.7	-4.76	5.07e-06	0.00101	132031886	132079645	MED27
chr18	12859067	12862141	1.62	6.31	-4.69	5.1e-06	0.00101	12836824	12862473	PTPN2
chr4	2663083	2663900	-0.25	5.25	-5.5	5.15e-06	0.00102	2659888	2663203	FAM193A
chr10	74190123	74191542	0.15	5.29	-5.14	5.17e-06	0.00102	74176770	74708934	ADK
chr8	117868145	117869489	1.38	5.95	-4.57	5.22e-06	0.00103	117822465	118110414	EXT1
chr19	58398569	58399435	-0.25	5.23	-5.48	5.24e-06	0.00103	58400221	58400679	LINC02560
chr1	151016045	151017475	0.72	5.62	-4.9	5.26e-06	0.00103	151024742	151035711	PRUNE1
chr17	59053523	59055500	0.13	5.35	-5.22	5.29e-06	0.00103	59064152	59079807	TRIM37
chr19	20194396	20197041	1.26	6.08	-4.82	5.31e-06	0.00103	20167228	20188776	ZNF486
chr7	105091271	105096727	-0.25	5.43	-5.68	5.31e-06	0.00103	105101471	105102649	KMT2E
chr19	43985895	43991383	1.26	6.47	-5.21	5.33e-06	0.00103	43984221	43996203	ZNF155
chr2	201635443	201637698	-0.25	5.36	-5.61	5.41e-06	0.00104	201636170	201639031	TMEM237
chr6	78857190	78858427	0.9	5.71	-4.81	5.55e-06	0.00107	78867551	78903102	IRAK1BP1
chr16	71764219	71766030	-0.25	5.21	-5.47	5.58e-06	0.00107	71750210	71764675	AP1G1
chr6	34322083	34323465	-0.25	5.29	-5.54	5.64e-06	0.00108	34279679	34392669	NUDT3
chr9	77942413	77943912	-0.25	5.27	-5.52	5.74e-06	0.0011	77797528	78030604	GNAQ
chr10	94577413	94580511	1.88	6.58	-4.7	5.92e-06	0.00113	94569195	94574448	HELLS
chr2	61381113	61382561	-0.25	5.4	-5.66	5.93e-06	0.00113	61339575	61348028	USP34
chr7	74545917	74546783	-0.25	5.23	-5.49	6.05e-06	0.00114	74545762	74601106	GTF2IRD1
chr2	121508662	121511583	-0.25	5.31	-5.56	6.08e-06	0.00115	121462535	121513073	CLASP1
chr15	41265172	41266652	-0.25	5.31	-5.57	6.08e-06	0.00115	41256910	41272375	CHP1
chr8	118032509	118034462	-0.25	5.2	-5.45	6.14e-06	0.00115	117822465	118110414	EXT1
chr20	49127171	49128703	1.29	6.03	-4.74	6.2e-06	0.00116	49113341	49154068	STAU1
chr2	37138822	37140355	-0.25	5.4	-5.66	6.2e-06	0.00116	37136729	37146961	EIF2AK2
chr11	74594831	74596537	-0.25	5.32	-5.58	6.22e-06	0.00116	74592644	74618770	POLD3
chr13	19728135	19729589	0.13	5.29	-5.15	6.23e-06	0.00116	19675429	19730316	PSPC1
chr1	39315392	39318332	-0.25	5.35	-5.61	6.31e-06	0.00117	39331138	39486987	MACF1
chr20	37052088	37053407	-0.25	5.4	-5.65	6.32e-06	0.00117	37056160	37068055	RBL1
chr4	7832308	7833541	0.46	5.47	-5.01	6.32e-06	0.00117	7842688	7843837	AFAP1
chr11	76474724	76476774	0.69	5.64	-4.95	6.35e-06	0.00117	76446939	76553025	EMSY
chr12	27783240	27786134	0.44	5.59	-5.15	6.49e-06	0.00119	27787635	27791926	KLHL42
chr3	170123502	170125178	0.13	5.26	-5.12	6.5e-06	0.00119	170117123	170128807	PHC3
chr5	40795057	40796782	-0.25	5.88	-6.13	6.53e-06	0.0012	40764937	40798148	PRKAA1
chr16	31888413	31890862	-0.25	5.35	-5.6	6.54e-06	0.0012	31874066	31914620	ZNF267
chr3	65876473	65877519	-0.25	5.24	-5.49	6.56e-06	0.0012	65893816	65925297	MAGI1-AS1
chr4	78082889	78084828	0.94	5.65	-4.72	6.58e-06	0.0012	78057604	78072107	FRAS1
chr18	4321400	4322807	0.21	5.35	-5.14	6.62e-06	0.0012	4264633	4295405	DLGAP1-AS5
chr17	67901745	67903318	-0.25	5.23	-5.49	6.63e-06	0.0012	67893221	67894078	BPTF
chr4	84962083	84964502	0.69	5.49	-4.8	6.65e-06	0.0012	84965534	85008734	WDFY3-AS2
chr17	2975547	2976149	0.13	5.24	-5.11	6.69e-06	0.00121	2962248	2965895	LOC101927911
chr1	211268627	211271927	-0.25	5.4	-5.65	6.7e-06	0.00121	211279238	211313474	RCOR3
chr11	9575697	9578112	-0.25	5.18	-5.44	6.75e-06	0.00121	9577785	9586581	WEE1
chr2	167388785	167393888	-0.25	5.49	-5.74	6.76e-06	0.00121	167248682	167259749	XIRP2
chr2	71437931	71439953	1.09	5.79	-4.7	6.83e-06	0.00122	71431183	71433566	ZNF638
chr9	122924881	122927145	-0.25	5.26	-5.51	6.85e-06	0.00122	122918100	122931265	ZBTB26
chr21	36972380	36974502	-0.25	5.39	-5.65	6.88e-06	0.00122	36937185	36966639	HLCS
chr12	95179042	95180688	-0.25	5.2	-5.45	6.89e-06	0.00122	95189192	95208956	FGD6
chr10	92642970	92646389	1.44	6.14	-4.7	6.92e-06	0.00122	92689955	92692483	HHEX
chr1	236587828	236590838	-0.25	5.59	-5.85	6.93e-06	0.00122	236595772	236599620	HEATR1
chr9	98067158	98069637	0.21	5.34	-5.13	6.97e-06	0.00123	98074643	98083075	NANS
chr10	27124782	27125916	0.13	5.23	-5.09	7.08e-06	0.00125	27123547	27136337	YME1L1
chr4	56367895	56371166	-0.25	5.26	-5.51	7.15e-06	0.00125	56382424	56384299	AASDH
chr2	207585921	207587930	-0.25	5.22	-5.48	7.23e-06	0.00126	207597165	207599182	CREB1
chr17	5385912	5388159	1.26	5.91	-4.65	7.24e-06	0.00126	5386104	5387132	NUP88
chr11	18513645	18515338	-0.25	5.22	-5.47	7.27e-06	0.00127	18483936	18514850	TSG101
chr9	83662184	83667545	2.45	7.05	-4.6	7.29e-06	0.00127	83661911	83665393	UBQLN1
chr12	12125638	12128293	-0.25	5.35	-5.61	7.33e-06	0.00127	12121047	12131830	LRP6
chr2	110649658	110651303	0.13	5.33	-5.19	7.39e-06	0.00128	110648817	110650739	BUB1
chr1	93522608	93524398	-0.25	5.32	-5.57	7.45e-06	0.00129	93529710	93552579	FNBP1L
chr8	67068798	67070432	-0.25	5.28	-5.53	7.49e-06	0.00129	67043079	67064943	COPS5
chr19	36581070	36582493	-0.25	5.23	-5.49	7.51e-06	0.00129	36577228	36594708	ZNF529-AS1
chr12	813767	816397	0.72	5.47	-4.76	7.54e-06	0.00129	829925	861135	WNK1
chr17	36537247	36538848	-0.25	5.33	-5.58	7.58e-06	0.0013	36535555	36539310	PIGW
chr2	38573818	38578930	0.83	5.87	-5.04	7.59e-06	0.0013	38568079	38569836	HNRNPLL
chr14	95891169	95895520	2.42	7.01	-4.59	7.8e-06	0.00132	95876819	95923055	TUNAR
chr6	136484352	136486667	0.44	5.33	-4.89	7.81e-06	0.00132	136343782	136466875	MAP7
chr6	99544326	99550821	2.62	7.31	-4.69	7.82e-06	0.00132	99545205	99549647	CCNC
chr19	12772609	12773446	-0.25	5.21	-5.46	7.82e-06	0.00132	12763759	12772818	HOOK2
chr2	156440942	156442720	-0.25	5.2	-5.45	7.85e-06	0.00133	156436485	156583404	GPD2
chr8	102262824	102264990	-0.25	5.44	-5.69	7.87e-06	0.00133	102253946	102261986	UBR5
chr15	69442825	69444045	0.13	5.33	-5.19	7.9e-06	0.00133	69443605	69447884	KIF23
chr11	119065795	119067047	-0.25	5.29	-5.54	7.9e-06	0.00133	119067692	119081978	VPS11
chr21	37493049	37495573	-0.25	5.38	-5.63	7.94e-06	0.00133	37488785	37512559	DYRK1A
chr11	43382790	43385076	0.9	5.65	-4.75	7.97e-06	0.00133	43379258	43391788	TTC17
chr8	65624400	65625301	0.13	5.28	-5.15	8.01e-06	0.00134	65605433	65634162	ARMC1
chr1	20858210	20859789	-0.25	5.4	-5.66	8.02e-06	0.00134	20825104	20847945	EIF4G3
chr2	69875649	69878466	-0.25	5.42	-5.67	8.04e-06	0.00134	69869557	69878990	GMCL1
chr7	107489732	107491396	0.15	5.2	-5.05	8.09e-06	0.00134	107362068	107480942	COG5
chr11	76355917	76357375	0.15	5.33	-5.18	8.1e-06	0.00134	76349956	76359573	THAP12
chr2	182990556	182995112	1.09	5.99	-4.9	8.28e-06	0.00137	182957141	182964764	NCKAP1
chr6	149517931	149519669	-0.25	5.26	-5.51	8.32e-06	0.00137	149505275	149517864	PPIL4
chr1	193172913	193176473	-0.25	5.19	-5.44	8.46e-06	0.00139	193186491	193251191	CDC73
chr2	111868179	111870608	1.66	6.36	-4.7	8.52e-06	0.0014	111872690	111880825	ANAPC1
chr7	134790347	134795281	2.07	7.16	-5.1	8.73e-06	0.00143	134779715	134867975	CALD1
chr4	164893042	164898480	2.07	7.03	-4.96	8.9e-06	0.00145	164877242	164898965	APELA
chr5	122002536	122005679	-0.25	5.2	-5.46	8.92e-06	0.00145	122020530	122075570	SRFBP1
chr6	157874042	157886194	2.07	7.04	-4.97	8.94e-06	0.00145	157823246	157945077	SNX9
chr2	37206870	37211651	-0.25	5.36	-5.61	8.94e-06	0.00145	37201784	37212108	CEBPZ
chr6	38056777	38059629	-0.25	5.17	-5.42	9.01e-06	0.00146	38061611	38062660	ZFAND3
chr15	58782649	58784921	-0.25	5.32	-5.57	9.02e-06	0.00146	58796077	58831819	MINDY2
chr8	122919749	122921589	-0.25	5.12	-5.37	9.05e-06	0.00146	122863385	122952009	ZHX2
chr8	73052530	73056875	1.88	6.74	-4.86	9.14e-06	0.00147	73031613	73038804	TERF1
chr10	87778662	87783404	1.62	6.04	-4.43	9.2e-06	0.00148	87753117	87814882	ATAD1
chr9	106995450	106997163	0.46	5.41	-4.95	9.6e-06	0.00153	107009189	107011018	ZNF462
chr6	38049065	38051721	1.95	6.41	-4.46	9.6e-06	0.00153	38061611	38062660	ZFAND3
chr17	21158686	21161223	1	5.55	-4.54	9.93e-06	0.00158	21166154	21172443	DHRS7B
chr10	77800061	77801543	-0.25	5.09	-5.34	9.94e-06	0.00158	77806796	77807977	DLG5
chr8	86378828	86381207	-0.25	5.09	-5.34	1e-05	0.00159	86380817	86448497	WWP1
chr9	74093510	74096798	-0.25	5.4	-5.65	1.01e-05	0.00159	74371335	74373048	LOC101927358
chr7	20061944	20066453	1.77	6.58	-4.8	1.01e-05	0.00159	19931071	20125162	LOC101927668
chr3	139404007	139405788	0.15	5.45	-5.31	1.01e-05	0.00159	139419581	139579095	LOC100507291
chr1	85580881	85582941	1.77	6.52	-4.75	1.01e-05	0.00159	85581200	85582099	CCN1
chr9	98252871	98253812	-0.25	5.09	-5.35	1.02e-05	0.0016	98199029	98255580	TBC1D2
chr2	152674105	152675908	0.95	5.61	-4.67	1.02e-05	0.00161	152663131	152663855	PRPF40A
chr1	51769923	51770662	0.9	5.53	-4.63	1.03e-05	0.00161	51772076	51781668	OSBPL9
chr5	90492750	90494386	-0.25	5.33	-5.58	1.03e-05	0.00161	90474895	90490858	POLR3G
chr22	33362765	33364182	0.46	5.46	-5	1.04e-05	0.00162	33162226	33384227	LARGE1
chr5	142824215	142825311	0.13	5.26	-5.13	1.04e-05	0.00162	142859604	142868910	ARHGAP26-AS1
chr15	57088089	57092448	1.06	5.75	-4.69	1.05e-05	0.00163	57109258	57243553	TCF12
chr2	239240703	239242435	0.13	5.14	-5.01	1.05e-05	0.00163	239186488	239236669	HDAC4
chr6	87218627	87221279	-0.25	5.09	-5.34	1.06e-05	0.00163	87213738	87222867	ZNF292
chr16	72607739	72609315	-0.25	5.27	-5.52	1.06e-05	0.00164	72479751	72627686	LINC01572
chr6	89734112	89735071	-0.25	5.12	-5.37	1.06e-05	0.00164	89673469	89675783	LOC101929057
chr15	81839002	81841020	-0.25	5.23	-5.48	1.07e-05	0.00164	82041778	82046018	MEX3B
chr12	32164045	32165677	-0.25	5.07	-5.33	1.07e-05	0.00164	32107332	32338809	BICD1
chr14	39156226	39157803	0.69	5.8	-5.11	1.07e-05	0.00164	39149990	39170314	TRAPPC6B
chr2	44368884	44370262	-0.25	5.07	-5.33	1.07e-05	0.00164	44369711	44392000	CAMKMT
chr12	107752973	107755191	-0.25	5.19	-5.44	1.09e-05	0.00166	107742249	107751775	PRDM4
chr11	124785158	124789159	1.58	6.26	-4.68	1.09e-05	0.00166	124766616	124783290	MSANTD2
chr17	4224243	4226780	1.4	6.06	-4.66	1.09e-05	0.00166	4194461	4242450	ANKFY1
chr6	52561319	52562931	0.69	5.39	-4.7	1.11e-05	0.00169	52576787	52584001	TRAM2-AS1
chr21	33356172	33357946	0.72	5.44	-4.72	1.12e-05	0.00169	33325005	33343604	IFNAR1
chr7	152793902	152796264	0.69	5.4	-4.71	1.12e-05	0.00169	152800623	152816522	ACTR3B
chr12	133011847	133015783	2.03	6.48	-4.44	1.12e-05	0.0017	133004404	133012127	ZNF26
chr1	196594087	196598459	1.66	6.32	-4.66	1.13e-05	0.0017	196227859	196608359	KCNT2
chr7	128610017	128615573	2.26	6.63	-4.37	1.13e-05	0.0017	128672288	128678112	FAM71F2
chr2	232750335	232751520	1.09	5.66	-4.57	1.13e-05	0.0017	232764436	232791035	GIGYF2
chr17	67103082	67105146	-0.25	5.25	-5.51	1.13e-05	0.0017	67044554	67056797	CACNG1
chr10	103974949	103977609	0.97	5.48	-4.51	1.14e-05	0.0017	103967201	104029233	SLK
chr13	21581076	21584375	-0.25	5.21	-5.46	1.14e-05	0.0017	21510027	21603711	MICU2
chr15	28169980	28172533	0.15	5.17	-5.03	1.15e-05	0.00171	28152759	28174423	HERC2
chr10	87789337	87794569	1.82	6.53	-4.71	1.15e-05	0.00171	87753117	87814882	ATAD1
chr19	12661847	12662721	0.46	5.44	-4.98	1.15e-05	0.00171	12660897	12663418	MAN2B1
chr17	30607059	30608462	0.9	5.52	-4.61	1.18e-05	0.00175	30607566	30672789	SMURF2P1-LRRC37BP1
chr1	35814610	35816685	-0.25	5.14	-5.39	1.2e-05	0.00177	35808016	35857890	AGO4
chr1	246878057	246887509	2.2	7.22	-5.02	1.21e-05	0.00179	246849871	246877068	AHCTF1
chr17	68108691	68110629	0.13	5.3	-5.17	1.21e-05	0.00179	68102943	68115518	LINC00674
chr1	8728774	8730574	-0.25	5.1	-5.35	1.22e-05	0.00179	8464970	8753838	RERE
chr9	98058433	98060387	0.72	5.4	-4.68	1.24e-05	0.00182	98056770	98061259	NANS
chr5	179066370	179068377	-0.25	5.1	-5.35	1.24e-05	0.00182	179060373	179083977	ZNF354C
chr9	95258076	95259168	-0.25	5.21	-5.46	1.25e-05	0.00182	95185190	95254364	FANCC
chr2	39275050	39276886	-0.25	5.07	-5.33	1.25e-05	0.00183	39271911	39278419	MAP4K3
chr10	11512425	11514675	0.95	5.63	-4.68	1.26e-05	0.00183	11460510	11532275	USP6NL
chr2	99397081	99399510	0.9	5.52	-4.62	1.26e-05	0.00183	99397047	99399774	EIF5B
chr2	158473744	158476623	1.06	5.64	-4.58	1.26e-05	0.00184	158458193	158621396	PKP4
chr3	157147566	157160104	2.76	8.35	-5.59	1.28e-05	0.00185	157147795	157154666	CCNL1
chr15	58874632	58876655	-0.25	5.08	-5.34	1.28e-05	0.00185	58865175	59031216	RNF111
chr8	12207573	12218365	-0.25	5.08	-5.33	1.29e-05	0.00186	12194467	12196280	FAM85A
chr1	220578291	220580288	-0.25	5.1	-5.35	1.29e-05	0.00186	220528850	220579508	MARK1
chr3	134163346	134165024	-0.25	5.04	-5.29	1.31e-05	0.00188	134157134	134181672	RYK
chr3	194438595	194441459	0.97	5.52	-4.55	1.31e-05	0.00188	194430930	194432022	ATP13A3
chr6	63692702	63694287	-0.25	5.12	-5.37	1.31e-05	0.00188	63702293	63706154	PHF3
chr12	121628795	121629767	0.45	5.36	-4.91	1.31e-05	0.00188	121626816	121641533	ORAI1
chr1	167307487	167309643	-0.25	5.07	-5.32	1.33e-05	0.00189	167329044	167427345	POU2F1
chr6	154820703	154825817	2.96	7.06	-4.09	1.34e-05	0.0019	154832697	155257723	TIAM2
chr21	42912048	42915553	1.58	6.24	-4.66	1.35e-05	0.00191	42916803	42925646	ERVH48-1
chr3	119935495	119937515	0.72	5.56	-4.84	1.4e-05	0.00198	119826701	119876508	GSK3B
chr7	51104954	51105847	0.72	5.4	-4.68	1.4e-05	0.00198	51017280	51035955	COBL
chr4	164891690	164892380	-0.25	5.04	-5.29	1.41e-05	0.00199	164877242	164898965	APELA
chr4	53451879	53454423	-0.25	5.07	-5.32	1.43e-05	0.00201	53458551	53459402	FIP1L1
chr6	149702126	149707637	1.77	6.43	-4.65	1.43e-05	0.00201	149661094	149702354	LATS1
chr6	73436810	73437653	-0.25	5.08	-5.34	1.43e-05	0.00201	73439743	73445685	CGAS
chr18	62866038	62868135	0.9	5.61	-4.7	1.44e-05	0.00202	62832174	62895088	PHLPP1
chr10	98218661	98220700	-0.25	5.08	-5.33	1.44e-05	0.00202	98247690	98268194	LOXL4
chr4	153491778	153495056	1.27	5.9	-4.63	1.45e-05	0.00202	153466360	153636711	TMEM131L
chr1	52372881	52373859	-0.25	5.04	-5.29	1.45e-05	0.00202	52350593	52366193	CC2D1B
chr22	44754154	44754985	-0.25	5.01	-5.27	1.46e-05	0.00202	44752705	44814718	ARHGAP8
chr19	53806059	53808584	2.16	6.41	-4.25	1.46e-05	0.00202	53793743	53808705	NLRP12
chr7	24385996	24388962	2.27	6.72	-4.45	1.46e-05	0.00202	24285107	24291824	NPY
chr2	130124018	130127020	-0.25	5.05	-5.3	1.46e-05	0.00202	130073535	130129222	POTEF
chr5	84173967	84175883	-0.25	5.48	-5.73	1.46e-05	0.00202	84106660	84181242	EDIL3
chr19	20378694	20379511	-0.25	5.02	-5.27	1.47e-05	0.00203	20399272	20399354	MIR1270
chr6	30616012	30617190	0.72	5.52	-4.8	1.48e-05	0.00204	30600413	30617243	PPP1R10
chr4	57021726	57024205	1.27	5.78	-4.51	1.48e-05	0.00204	57023227	57023751	POLR2B
chr15	97328400	97331034	1.55	5.76	-4.21	1.49e-05	0.00204	97491204	97515387	LINC02254
chr3	197612065	197614649	-0.25	5.01	-5.27	1.51e-05	0.00205	197578213	197615660	LOC220729
chr3	57790999	57791532	-0.25	5.04	-5.29	1.51e-05	0.00205	57757558	57928948	SLMAP
chr18	55308812	55314821	-0.25	5.16	-5.41	1.51e-05	0.00205	55279566	55320881	TCF4
chr5	119468936	119471014	0.55	5.59	-5.04	1.52e-05	0.00207	119471661	119541994	HSD17B4
chr19	53406174	53407801	-0.25	5.09	-5.35	1.53e-05	0.00208	53395173	53430413	ZNF765
chr15	29735377	29737376	-0.25	5.25	-5.51	1.57e-05	0.00213	29732134	29732933	TJP1
chr4	86596707	86599971	1.09	5.59	-4.5	1.57e-05	0.00213	86595693	86689061	PTPN13
chr12	46271127	46272755	0.97	5.51	-4.54	1.58e-05	0.00213	46229232	46269951	SLC38A1
chr11	77699068	77701637	-0.25	5	-5.26	1.58e-05	0.00213	77690966	77700761	RSF1
chr4	78085146	78086698	-0.25	5.03	-5.28	1.58e-05	0.00213	78057604	78072107	FRAS1
chr9	120458281	120459314	0.91	5.41	-4.49	1.59e-05	0.00214	120439790	120458522	CDK5RAP2
chr1	180779449	180781979	-0.25	4.99	-5.24	1.6e-05	0.00215	180836652	180874055	XPR1
chr2	167325348	167326449	-0.25	5.01	-5.27	1.6e-05	0.00215	167248682	167259749	XIRP2
chr7	23683591	23685829	1.29	5.82	-4.52	1.61e-05	0.00215	23680199	23702650	FAM221A
chr16	1195946	1197146	-0.25	5.09	-5.34	1.61e-05	0.00216	1195029	1198934	CACNA1H
chr11	117031365	117036520	-0.25	4.99	-5.24	1.62e-05	0.00216	116845593	117098271	SIK3
chr21	39623113	39626600	2.35	6.68	-4.33	1.65e-05	0.00219	39612940	39662888	B3GALT5
chr3	57850761	57852850	0.15	5.13	-4.98	1.66e-05	0.0022	57860760	57929126	SLMAP
chr2	229907720	229910057	1.26	5.79	-4.53	1.66e-05	0.0022	229859226	229921358	TRIP12
chr21	25755263	25756011	-0.25	5.06	-5.31	1.67e-05	0.00221	25724480	25735673	ATP5PF
chr5	73502956	73505469	-0.25	5.69	-5.94	1.68e-05	0.00223	73502591	73505493	BTF3
chr3	44733290	44739025	2.07	6.84	-4.77	1.69e-05	0.00224	44729781	44732265	ZNF501
chr15	90032453	90034074	-0.25	5.17	-5.42	1.69e-05	0.00224	90006755	90006841	MIR3174
chr6	37286567	37288165	-0.25	5.08	-5.33	1.7e-05	0.00224	37217324	37258155	TMEM217
chr6	28134076	28135698	-0.25	5.14	-5.39	1.7e-05	0.00224	28015122	28136821	ZSCAN16-AS1
chr8	117964410	117965535	-0.25	5.08	-5.33	1.72e-05	0.00226	117822465	118110414	EXT1
chr2	88171335	88172279	-0.25	5.15	-5.4	1.72e-05	0.00226	88171460	88186626	THNSL2
chr13	50242499	50243937	0.13	5.3	-5.17	1.73e-05	0.00226	50224281	50401366	DLEU1
chr1	229661899	229662971	-0.25	4.97	-5.22	1.73e-05	0.00226	229650847	229659126	URB2
chr2	152679867	152688346	2.28	7.22	-4.94	1.73e-05	0.00226	152679129	152693111	PRPF40A
chr1	21088268	21089671	-0.25	5.32	-5.57	1.73e-05	0.00226	21064531	21111610	EIF4G3
chr2	202039703	202044418	2.16	6.62	-4.46	1.74e-05	0.00226	202034587	202038445	FZD7
chr14	99982865	99984240	-0.25	5.05	-5.3	1.75e-05	0.00228	99971449	100144236	EVL
chr4	153503480	153505210	-0.25	5.12	-5.37	1.76e-05	0.00228	153466360	153636711	TMEM131L
chr4	151297264	151298473	-0.25	5.07	-5.32	1.76e-05	0.00228	151277171	151291453	PRSS48
chr2	215931742	215934951	1.77	6.42	-4.65	1.76e-05	0.00228	215942584	216013551	MREG
chr17	67497896	67500021	0.46	5.21	-4.75	1.77e-05	0.00228	67471489	67471585	MIR548D2
chr8	67205448	67206800	0.13	5.14	-5	1.77e-05	0.00228	67199011	67207190	ARFGEF1
chr9	16831714	16834588	0.69	5.88	-5.19	1.78e-05	0.00229	16583060	16867692	BNC2
chrUn_GL000195v1	69266	71737	-0.25	5.02	-5.27	1.79e-05	0.0023	42939	49164	LOC389831
chr18	55256702	55257795	-0.25	5.01	-5.27	1.79e-05	0.0023	55228260	55257495	TCF4
chr9	85960128	85962541	1.56	5.84	-4.29	1.79e-05	0.0023	85941529	85987041	NAA35
chr1	16464205	16464876	-0.25	4.96	-5.21	1.8e-05	0.0023	16460948	16468481	LINC01772
chr12	70313479	70318814	-0.25	5.26	-5.51	1.8e-05	0.0023	70319024	70335833	CNOT2
chr10	52022998	52025075	-0.25	5.02	-5.27	1.8e-05	0.0023	52046748	52185074	PRKG1
chr8	91035549	91038071	1.55	5.78	-4.23	1.81e-05	0.00231	91024302	91040749	PIP4P2
chr2	32542828	32544079	-0.25	4.96	-5.22	1.82e-05	0.00232	32532153	32532246	MIR558
chr22	33472220	33474536	-0.25	5.02	-5.27	1.83e-05	0.00232	33436582	33436669	MIR4764
chr2	43976989	43978410	-0.25	5.28	-5.53	1.83e-05	0.00232	43948426	43963804	LRPPRC
chr4	118689588	118691251	0.46	5.19	-4.73	1.83e-05	0.00232	118691534	118697355	METTL14
chr3	100138745	100139864	-0.25	5.03	-5.28	1.84e-05	0.00232	100159818	100178355	CMSS1
chr10	12145823	12147183	1.67	5.89	-4.22	1.84e-05	0.00232	12149856	12164547	SEC61A2
chr1	213069071	213071416	-0.25	5.02	-5.27	1.88e-05	0.00237	213072938	213274773	RPS6KC1
chr8	103524721	103525590	-0.25	4.97	-5.23	1.92e-05	0.0024	103398658	103501895	SLC25A32
chr3	154258326	154261606	0.83	5.48	-4.65	1.92e-05	0.0024	154276029	154277835	DHX36
chr15	72767809	72769578	-0.25	5.23	-5.48	1.93e-05	0.00241	72760249	72775114	ADPGK
chr6	78988847	78990469	-0.25	5.2	-5.45	1.93e-05	0.00241	78940546	78982943	PHIP
chr1	227225447	227226656	-0.25	5.09	-5.35	1.94e-05	0.00242	227199557	227254155	CDC42BPA
chr3	197220616	197223834	1.66	6.2	-4.53	1.94e-05	0.00242	197042943	197223014	DLG1
chr8	140724849	140728978	0.9	5.45	-4.54	1.95e-05	0.00243	140700921	140721788	PTK2
chr12	71624084	71625730	-0.25	5	-5.26	1.96e-05	0.00244	71615071	71619965	ZFC3H1
chr11	63908124	63909363	0.69	5.3	-4.61	1.97e-05	0.00245	63911955	63912307	RCOR2
chr7	24633566	24636358	1.09	5.57	-4.47	1.98e-05	0.00245	24623668	24624070	MPP6
chr1	44880738	44881408	-0.25	4.97	-5.22	1.99e-05	0.00246	44863004	44875622	EIF2B3
chr1	225525411	225532504	2.38	7.4	-5.02	1.99e-05	0.00246	225495480	225515397	ENAH
chr6	144629814	144630604	-0.25	4.99	-5.24	2.01e-05	0.00248	144659844	144678552	UTRN
chr2	188468682	188475152	3.05	7.68	-4.64	2.02e-05	0.00248	188522738	188584309	GULP1
chr1	227309237	227312976	1.98	6.68	-4.7	2.05e-05	0.0025	227193651	227317047	CDC42BPA
chr2	71424391	71426058	-0.25	5.02	-5.27	2.05e-05	0.0025	71426846	71435058	ZNF638
chr20	18609573	18610894	-0.25	5.05	-5.31	2.06e-05	0.00252	18587964	18632684	DTD1
chr3	75767674	75769509	1.54	5.97	-4.44	2.07e-05	0.00252	75739292	75785058	ZNF717
chr1	33898024	33899908	0.13	5.02	-4.89	2.07e-05	0.00253	33875466	33885423	CSMD2-AS1
chr1	212991535	212992464	-0.25	5.1	-5.35	2.08e-05	0.00253	212997200	213000570	ANGEL2
chr1	6868559	6869944	-0.25	4.94	-5.19	2.08e-05	0.00253	6874056	6887842	CAMTA1
chr12	832099	836557	1.09	5.54	-4.45	2.09e-05	0.00253	829925	861135	WNK1
chr9	122863617	122864744	-0.25	4.98	-5.23	2.12e-05	0.00256	122853774	122855737	RC3H2
chr20	47355352	47356492	-0.25	5.02	-5.27	2.14e-05	0.00259	47209214	47355657	ZMYND8
chr11	1446424	1447826	0.46	5.45	-4.99	2.18e-05	0.00263	1450658	1462087	BRSK2
chr17	29521762	29524048	1.09	5.58	-4.49	2.19e-05	0.00263	29522288	29530738	TAOK1
chr1	84687754	84688889	-0.25	5.09	-5.34	2.19e-05	0.00264	84649630	84690289	SSX2IP
chr9	110063486	110066914	1.92	6.53	-4.6	2.21e-05	0.00266	110048698	110168633	PALM2AKAP2
chr1	193225143	193227435	1.26	5.67	-4.42	2.21e-05	0.00266	193233026	193251168	CDC73
chr4	139015910	139019971	2.02	6.68	-4.65	2.23e-05	0.00267	139015796	139045939	NOCT
chr22	40168699	40170050	0.83	5.46	-4.63	2.25e-05	0.00269	40177925	40246362	TNRC6B
chr11	83072354	83080758	2.65	7.41	-4.76	2.26e-05	0.0027	83072355	83073968	RAB30-DT
chr6	79040155	79041400	-0.25	5.06	-5.31	2.26e-05	0.0027	78934419	79078254	PHIP
chr2	182950916	182951635	0.13	4.99	-4.85	2.28e-05	0.00271	182928119	182947162	NCKAP1
chr3	87229747	87233029	1.55	5.84	-4.29	2.3e-05	0.00273	87227309	87255556	CHMP2B
chr14	96817882	96820931	1.88	6.42	-4.54	2.31e-05	0.00273	96797385	96853055	VRK1
chr5	31537816	31541776	1.66	6.13	-4.47	2.31e-05	0.00273	31538173	31545714	C5orf22
chr17	67740964	67741936	-0.25	4.97	-5.23	2.31e-05	0.00273	67740669	67740799	SNORA38B
chr3	32901088	32902962	-0.25	4.95	-5.2	2.31e-05	0.00273	32951644	32956349	CCR4
chr4	110052129	110053038	0.13	5.03	-4.9	2.32e-05	0.00273	110051694	110060039	ELOVL6
chr9	6842676	6844098	-0.25	4.94	-5.2	2.32e-05	0.00273	6805617	6819079	KDM4C
chr17	61968470	61970940	1.44	5.85	-4.41	2.33e-05	0.00274	61955311	61955763	MED13
chr6	57444176	57447648	0.44	5.09	-4.65	2.34e-05	0.00275	57390132	57390212	MIR548U
chr21	25977230	25980190	0.83	5.64	-4.81	2.36e-05	0.00277	25997188	26051018	APP
chr11	34941099	34942505	1	5.3	-4.3	2.37e-05	0.00278	34941837	34941920	MIR1343
chr9	37756791	37759144	0.13	5.03	-4.89	2.4e-05	0.00281	37753817	37778681	TRMT10B
chr6	105394589	105395438	-0.25	4.96	-5.21	2.41e-05	0.00281	105273220	105403084	PREP
chr16	15628200	15631663	-0.25	5.25	-5.5	2.41e-05	0.00281	15616785	15623150	MARF1
chr11	76114350	76115888	-0.25	5	-5.25	2.43e-05	0.00283	76115900	76141660	UVRAG
chr1	77994905	77995886	0.69	5.22	-4.53	2.44e-05	0.00284	78004935	78016299	DNAJB4
chr6	47241423	47242658	-0.25	4.96	-5.21	2.45e-05	0.00285	47231532	47309905	TNFRSF21
chr9	23805688	23806590	-0.25	4.94	-5.2	2.45e-05	0.00285	23690104	23821275	ELAVL2
chr7	121875862	121877779	-0.25	5.05	-5.3	2.46e-05	0.00285	121873481	122061979	PTPRZ1
chr6	76630800	76632638	1.69	6	-4.31	2.48e-05	0.00287	76521640	76593821	LINC02540
chr7	35642222	35642973	-0.25	5.13	-5.38	2.49e-05	0.00288	35634312	35668579	HERPUD2
chr7	24402788	24404693	-0.25	5.2	-5.45	2.51e-05	0.00289	24285107	24291824	NPY
chr6	149547181	149548070	-0.25	4.92	-5.18	2.51e-05	0.00289	149504495	149546043	PPIL4
chr10	95872823	95873962	-0.25	4.92	-5.18	2.52e-05	0.00289	95824094	95876661	ENTPD1-AS1
chr5	14372078	14373335	-0.25	4.94	-5.19	2.52e-05	0.00289	14387343	14387950	TRIO
chr13	20023456	20026550	1.27	5.8	-4.53	2.52e-05	0.00289	20024394	20086691	ZMYM2
chr7	131395511	131397634	-0.25	5.02	-5.28	2.53e-05	0.0029	131463276	131490539	MKLN1
chr14	92135798	92136693	0.15	5.14	-4.99	2.54e-05	0.0029	92121985	92135432	CPSF2
chr4	145144676	145145940	0.72	5.25	-4.53	2.54e-05	0.0029	145146094	145150895	OTUD4
chr19	15175734	15176712	-0.25	5	-5.25	2.55e-05	0.0029	15178390	15179220	NOTCH3
chr9	26923684	26925699	0.94	5.41	-4.47	2.59e-05	0.00294	26905883	26923233	PLAA
chr1	37871280	37872154	-0.25	4.89	-5.14	2.59e-05	0.00294	37866459	37873028	INPP5B
chr1	81879845	81882970	0.69	5.54	-4.85	2.59e-05	0.00294	81942969	81991368	ADGRL2
chr1	58661310	58668860	2.52	7.62	-5.09	2.61e-05	0.00295	58654751	58668483	MYSM1
chr10	119109758	119111488	-0.25	5.11	-5.36	2.63e-05	0.00298	119114105	119137984	DENND10
chr10	31874716	31877156	-0.25	5.16	-5.41	2.63e-05	0.00298	31820444	31854180	ARHGAP12
chr10	72187821	72189074	0.69	5.27	-4.58	2.64e-05	0.00298	72102404	72196989	ASCC1
chr11	129998242	130002131	1.87	6.37	-4.5	2.66e-05	0.003	129948056	130002785	PRDM10
chr5	115229682	115233668	-0.25	5.16	-5.41	2.67e-05	0.003	115216865	115231784	PGGT1B
chr15	57174840	57178624	1.26	5.75	-4.5	2.68e-05	0.00301	57214079	57243515	TCF12
chr1	63777584	63779310	-0.25	4.89	-5.14	2.7e-05	0.00303	63775290	64140364	ROR1
chr3	47659680	47665428	1.92	6.5	-4.58	2.7e-05	0.00303	47670350	47678365	SMARCC1
chr2	151825518	151827432	0.13	4.96	-4.83	2.71e-05	0.00303	151798797	151828421	ARL5A
chr6	87667490	87667836	-0.25	4.96	-5.21	2.71e-05	0.00303	87650930	87653214	ORC3
chr1	35836463	35837321	-0.25	4.98	-5.23	2.73e-05	0.00304	35841673	35851195	AGO4
chr8	35454479	35456338	-0.25	4.92	-5.17	2.73e-05	0.00304	35544392	35794662	UNC5D
chr19	46896840	46898671	-0.25	4.92	-5.18	2.74e-05	0.00305	46918676	47004307	ARHGAP35
chr2	195661410	195664042	-0.25	5.23	-5.48	2.75e-05	0.00305	195657449	195680433	SLC39A10
chr6	154796387	154798123	-0.25	4.95	-5.2	2.75e-05	0.00305	154832697	155257723	TIAM2
chr21	25593434	25595568	1.76	5.93	-4.17	2.75e-05	0.00305	25582770	25583326	LINC00515
chr3	46808104	46809634	0.71	5.17	-4.46	2.76e-05	0.00306	46809498	46811341	PRSS44P
chr6	110896055	110897519	-0.25	5.17	-5.42	2.76e-05	0.00306	110892825	110894061	AMD1
chr3	171373540	171374534	-0.25	4.96	-5.22	2.77e-05	0.00306	171063881	171460063	TNIK
chr12	50454412	50456490	-0.25	4.89	-5.14	2.8e-05	0.00308	50440479	50454962	LARP4
chr6	107910230	107911553	0.44	5.07	-4.63	2.8e-05	0.00308	107906465	107909159	SEC63
chr9	101534082	101535916	-0.25	5.19	-5.44	2.8e-05	0.00309	101533979	101540628	RNF20
chr17	60224261	60225450	-0.25	4.88	-5.14	2.81e-05	0.00309	60213581	60226063	USP32
chr4	15666278	15667902	-0.25	5.05	-5.31	2.81e-05	0.00309	15638539	15659867	FBXL5
chr4	145484400	145486078	-0.25	4.98	-5.23	2.85e-05	0.00312	145484513	145514703	SMAD1
chr14	75129498	75130556	-0.25	4.89	-5.14	2.88e-05	0.00315	75118887	75127344	NEK9
chr3	119828271	119829693	-0.25	5.02	-5.27	2.9e-05	0.00317	119826693	119843609	GSK3B
chr12	45228604	45229852	-0.25	4.99	-5.24	2.9e-05	0.00317	45216120	45313512	ANO6
chr15	73076354	73079264	1.92	6.12	-4.2	2.95e-05	0.00321	73052610	73302718	NEO1
chr16	23091387	23094452	-0.25	4.97	-5.22	2.97e-05	0.00324	23078979	23087130	USP31
chr14	89424681	89427149	1.54	6.03	-4.49	2.99e-05	0.00325	89417354	89419793	FOXN3-AS1
chr9	94547273	94548340	0.13	5	-4.87	3e-05	0.00326	94555054	94603990	PCAT7
chr11	134180960	134182106	-0.25	4.97	-5.22	3.04e-05	0.00329	134178483	134178914	NCAPD3
chr9	5638315	5640110	-0.25	4.97	-5.22	3.04e-05	0.00329	5629119	5776552	RIC1
chr5	37310884	37317337	2.66	7.08	-4.43	3.08e-05	0.00332	37291838	37310668	NUP155
chr4	52717529	52717971	-0.25	4.85	-5.1	3.08e-05	0.00332	52713639	52714882	DANCR
chr1	85382688	85384109	0.13	5.06	-4.93	3.09e-05	0.00333	85321452	85404528	DDAH1
chr4	26395069	26401355	2.46	7.38	-4.92	3.11e-05	0.00334	26420570	26424994	RBPJ
chr2	206810924	206812132	-0.25	4.93	-5.18	3.11e-05	0.00334	206786614	206790823	FASTKD2
chr2	188448636	188449892	-0.25	4.89	-5.14	3.11e-05	0.00334	188139637	188384313	LINC01090
chr1	38001960	38004446	1.98	6.19	-4.2	3.12e-05	0.00334	37996770	38005502	FHL3
chr6	132498687	132500579	0.72	5.26	-4.55	3.14e-05	0.00337	132475280	132513065	STX7
chr4	39855097	39857415	1.26	5.69	-4.43	3.15e-05	0.00337	39837012	39848561	PDS5A
chr6	78946712	78950915	-0.25	5.18	-5.43	3.16e-05	0.00337	78940546	78982943	PHIP
chr17	42252674	42254432	-0.25	4.9	-5.15	3.19e-05	0.0034	42199168	42276406	STAT5B
chr5	32395654	32396660	0.55	5.14	-4.58	3.2e-05	0.00341	32394378	32394475	MIR579
chr18	62919113	62920914	-0.25	4.9	-5.15	3.21e-05	0.00342	62906287	62941910	PHLPP1
chr11	6498073	6499061	-0.25	4.88	-5.13	3.22e-05	0.00342	6498216	6572022	DNHD1
chr1	108701246	108702292	-0.25	4.89	-5.14	3.23e-05	0.00343	108697700	108699385	PRPF38B
chr11	73566852	73568673	-0.25	4.88	-5.13	3.26e-05	0.00345	73412252	73598097	FAM168A
chr4	114479928	114484118	0.83	5.53	-4.7	3.31e-05	0.00349	114598770	114623305	UGT8
chr3	37393535	37394793	-0.25	4.86	-5.11	3.36e-05	0.00353	37399162	37435497	C3orf35
chr18	74592965	74597349	2.08	6.28	-4.2	3.36e-05	0.00353	74593201	74597569	LINC00909
chr2	37274015	37275642	0.69	5.18	-4.49	3.36e-05	0.00353	37260356	37274604	PRKD3
chr6	149390612	149398288	2.47	6.68	-4.21	3.39e-05	0.00355	149397692	149409617	TAB2
chr3	3145851	3147011	-0.25	4.91	-5.16	3.4e-05	0.00356	3140540	3149023	TRNT1
chr5	113222713	113233995	-0.25	4.97	-5.23	3.4e-05	0.00356	113026132	113234677	MCC
chr18	55492889	55497125	1.09	5.46	-4.37	3.43e-05	0.00358	55227689	55510772	TCF4
chr8	18852279	18858472	1.77	6.14	-4.37	3.44e-05	0.00359	18765449	18854374	PSD3
chr6	87245987	87247616	1.4	5.81	-4.41	3.45e-05	0.0036	87233524	87255049	ZNF292
chr9	125615343	125616192	-0.25	4.84	-5.09	3.45e-05	0.0036	125438655	125595646	MAPKAP1
chr7	77681463	77682883	0.79	5.16	-4.38	3.47e-05	0.00361	77684785	77696253	APTR
chr10	87864865	87866909	1.06	5.46	-4.4	3.47e-05	0.00361	87864468	87894326	PTEN
chr7	131367491	131370205	1.66	6.01	-4.35	3.49e-05	0.00362	131322716	131328312	MKLN1-AS
chr19	12759678	12760679	-0.25	4.96	-5.22	3.5e-05	0.00363	12763363	12763722	HOOK2
chr7	109585134	109587227	-0.25	4.91	-5.16	3.52e-05	0.00365	109959218	109960184	EIF3IP1
chr5	116481242	116482214	-0.25	5.16	-5.41	3.57e-05	0.00369	116447688	116480279	SEMA6A
chr19	17172482	17174205	-0.25	4.9	-5.16	3.58e-05	0.00369	17172813	17184002	MYO9B
chr10	114152532	114154116	-0.25	4.85	-5.1	3.6e-05	0.00371	114124929	114144602	CCDC186
chr13	47975860	47976654	-0.25	5.16	-5.41	3.6e-05	0.00371	47948940	47988548	SUCLA2
chr8	74848475	74849126	-0.25	4.82	-5.07	3.61e-05	0.00371	74824786	74849425	PI15
chr12	56558022	56558838	-0.25	4.98	-5.23	3.62e-05	0.00372	56562414	56569920	RBMS2
chr8	102261209	102261797	0.15	4.99	-4.84	3.63e-05	0.00372	102253946	102261986	UBR5
chr12	76026246	76028975	0.69	5.33	-4.63	3.7e-05	0.00378	76025447	76031604	PHLDA1
chr1	225489284	225491129	-0.25	5.32	-5.57	3.71e-05	0.00379	225497423	225501256	ENAH
chr18	21799330	21804021	1.06	5.64	-4.57	3.76e-05	0.00383	21803733	21819558	MIB1
chr2	222571895	222573434	0.69	5.15	-4.46	3.76e-05	0.00383	222566899	222656092	FARSB
chr9	32511019	32511792	-0.25	4.85	-5.1	3.8e-05	0.00387	32455302	32526196	DDX58
chr12	56301136	56302368	-0.25	4.92	-5.18	3.81e-05	0.00387	56286160	56300391	CS
chr10	77873327	77874255	0.44	5.03	-4.59	3.82e-05	0.00387	77790791	77869191	DLG5
chr3	183032779	183033575	-0.25	4.86	-5.12	3.82e-05	0.00387	183022469	183037355	MCCC1
chr11	73352382	73353014	-0.25	4.87	-5.12	3.82e-05	0.00387	73356477	73357092	ARHGEF17
chr7	38832386	38833594	-0.25	4.86	-5.12	3.83e-05	0.00388	38795492	38831346	VPS41
chr1	229543660	229544364	-0.25	4.83	-5.08	3.84e-05	0.00388	229526062	229531902	ABCB10
chr2	69334977	69336857	-0.25	4.91	-5.16	3.84e-05	0.00388	69350098	69363592	GFPT1
chr1	81245874	81248889	1.98	6.46	-4.48	3.85e-05	0.00388	81306160	81735330	ADGRL2
chr6	149513981	149515227	1.09	5.46	-4.37	3.85e-05	0.00388	149505275	149517864	PPIL4
chr21	46492480	46493326	-0.25	4.84	-5.09	3.86e-05	0.00388	46504313	46545205	DIP2A
chr12	11818116	11819065	-0.25	4.81	-5.06	3.88e-05	0.0039	11752501	11840868	ETV6
chr9	127626842	127627858	0.13	5.02	-4.88	3.89e-05	0.0039	127612361	127613751	STXBP1
chr2	85409941	85411519	0.13	5.06	-4.92	3.89e-05	0.0039	85394753	85410366	CAPG
chr7	74717164	74719104	-0.25	4.85	-5.1	3.94e-05	0.00394	74716612	74730289	GTF2I
chr5	10697979	10699459	-0.25	4.99	-5.24	3.94e-05	0.00394	10748083	10761101	DAP
chr2	187665867	187669115	1.56	5.96	-4.4	3.95e-05	0.00394	187496881	187565760	TFPI
chr7	84179962	84180685	-0.25	4.97	-5.22	3.95e-05	0.00394	83955777	84194789	SEMA3A
chr17	67926027	67928458	-0.25	4.89	-5.14	3.97e-05	0.00396	67920100	67940545	BPTF
chr17	67437701	67439087	-0.25	4.87	-5.12	3.98e-05	0.00396	67457538	67578256	PITPNC1
chr15	26696384	26698235	1.13	5.57	-4.44	3.98e-05	0.00396	26543546	26716765	GABRB3
chr16	71747800	71750434	1.67	6.2	-4.53	4.05e-05	0.00401	71731883	71747396	AP1G1
chr12	120505887	120507108	0.9	5.31	-4.41	4.05e-05	0.00401	120509851	120516684	COQ5
chr3	66376718	66377972	0.46	5.23	-4.77	4.05e-05	0.00401	66380225	66404410	LRIG1
chr6	26124538	26128477	2.54	6.73	-4.18	4.06e-05	0.00402	26123356	26123926	H2BC4
chr4	153784142	153785020	-0.25	4.83	-5.08	4.08e-05	0.00403	153780591	153789083	SFRP2
chr14	27632026	27633065	-0.25	5.2	-5.45	4.08e-05	0.00403	27633205	27633278	MIR3171
chr11	1448485	1449259	0.15	4.98	-4.83	4.1e-05	0.00403	1450658	1462087	BRSK2
chr10	127032644	127034265	1.53	5.6	-4.06	4.1e-05	0.00403	127110245	127128096	DOCK1
chr1	232125794	232140992	3.06	8.43	-5.37	4.1e-05	0.00403	231925834	231945233	DISC1-IT1
chr17	42320858	42322109	1.06	5.38	-4.32	4.11e-05	0.00403	42323035	42325061	STAT3
chr15	38286824	38288733	1.81	5.92	-4.11	4.11e-05	0.00403	38253181	38339771	SPRED1
chr17	82983716	82985026	0.46	5.17	-4.71	4.14e-05	0.00406	82942155	83006988	B3GNTL1
chr20	40217694	40218613	-0.25	4.93	-5.18	4.16e-05	0.00407	40005785	40008524	LINC01370
chr1	44900483	44901210	-0.25	4.84	-5.1	4.18e-05	0.00409	44863004	44875622	EIF2B3
chr8	65619782	65620374	-0.25	4.82	-5.07	4.19e-05	0.00409	65605433	65634162	ARMC1
chr10	63536536	63537748	0.44	4.98	-4.54	4.21e-05	0.0041	63219877	63521850	JMJD1C
chr1	235444345	235445541	-0.25	4.79	-5.04	4.21e-05	0.0041	235441870	235448963	TBCE
chr12	79090506	79091143	-0.25	4.83	-5.08	4.22e-05	0.0041	79046318	79296139	SYT1
chr4	92262299	92267041	-0.25	5.1	-5.35	4.22e-05	0.0041	92268767	92277075	LNCPRESS2
chr1	20765655	20768084	1.13	5.52	-4.39	4.24e-05	0.00412	20742682	20775005	HP1BP3
chr6	161059119	161061651	-0.25	4.79	-5.04	4.27e-05	0.00414	161073329	161086444	MAP3K4
chr7	128979613	128981729	-0.25	4.83	-5.09	4.28e-05	0.00414	128940838	128949388	IRF5
chr20	56641473	56641946	-0.25	4.78	-5.03	4.28e-05	0.00414	56630234	56631547	TFAP2C
chr19	3618409	3619129	-0.25	4.8	-5.05	4.29e-05	0.00414	3613507	3619166	CACTIN
chr6	151388453	151389270	-0.25	4.78	-5.03	4.29e-05	0.00414	151364115	151391559	ZBTB2
chr1	116412311	116413028	-0.25	4.79	-5.04	4.3e-05	0.00414	116405509	116418536	ATP1A1-AS1
chr4	122920525	122921618	-0.25	4.84	-5.09	4.3e-05	0.00414	122892650	122922442	NUDT6
chr11	2651514	2652325	-0.25	4.78	-5.04	4.3e-05	0.00414	2608328	2699994	KCNQ1OT1
chr19	23918469	23920596	-0.25	4.96	-5.22	4.31e-05	0.00414	23914919	23944713	ZNF726
chr2	209305424	209307551	-0.25	4.97	-5.22	4.32e-05	0.00415	209424058	209730518	MAP2
chr10	14907986	14909770	0.72	5.23	-4.51	4.35e-05	0.00417	14909170	14911322	DCLRE1C
chr10	73577872	73579261	-0.25	4.91	-5.16	4.44e-05	0.00424	73518722	73576337	USP54
chr6	156988320	156991589	1.66	5.96	-4.3	4.44e-05	0.00424	157022286	157208694	ARID1B
chr8	118610187	118611479	-0.25	4.94	-5.19	4.46e-05	0.00424	118620498	118906091	SAMD12-AS1
chr4	150826860	150828369	1.16	5.34	-4.18	4.46e-05	0.00424	150840540	150848887	LRBA
chr6	90533045	90534457	1.12	5.29	-4.17	4.46e-05	0.00424	90515634	90537218	MAP3K7
chr10	5701013	5704256	0.69	5.37	-4.68	4.46e-05	0.00424	5699493	5714207	TASOR2
chr12	50534238	50536684	1.26	5.59	-4.34	4.47e-05	0.00424	50504985	50748657	DIP2B
chr1	243171837	243173461	-0.25	4.85	-5.1	4.47e-05	0.00424	243165989	243175188	CEP170
chr1	45956483	45958479	0.69	5.23	-4.54	4.48e-05	0.00424	45959386	46011109	MAST2
chr5	127526676	127532687	1.98	6.23	-4.25	4.49e-05	0.00426	127517946	127524108	PRRC1
chr2	189461304	189463642	0.44	5.37	-4.94	4.51e-05	0.00427	189462484	189464211	WDR75
chr22	38358799	38361888	0.44	5.02	-4.58	4.52e-05	0.00427	38336337	38344434	TPTEP2-CSNK1E
chr12	106813248	106814207	-0.25	4.77	-5.02	4.52e-05	0.00427	106822258	106887282	RIC8B
chr11	20039369	20042130	2.18	6.12	-3.94	4.52e-05	0.00427	20043846	20049303	NAV2-AS2
chr1	109100947	109104680	2.59	7.01	-4.42	4.53e-05	0.00427	109100193	109100619	SCARNA2
chr18	9137738	9140115	-0.25	4.87	-5.12	4.54e-05	0.00427	9137563	9283759	ANKRD12
chr1	161793075	161794878	-0.25	4.81	-5.06	4.55e-05	0.00427	161766320	161964070	ATF6
chr6	56785016	56786110	0.72	5.13	-4.41	4.55e-05	0.00427	56670675	56785879	DST
chr16	53483278	53484848	0.9	5.23	-4.33	4.55e-05	0.00427	53479546	53480755	RBL2
chr4	185261810	185263182	0.55	5.06	-4.51	4.56e-05	0.00428	185295827	185363510	SNX25
chr18	191525	197552	2.86	6.97	-4.11	4.62e-05	0.00432	196539	211268	USP14
chr9	136072277	136074147	0.94	5.27	-4.34	4.63e-05	0.00433	136006537	136095289	NACC2
chr12	15899960	15900957	-0.25	4.92	-5.17	4.63e-05	0.00433	15900899	15903478	STRAP
chr3	98296617	98297800	1.72	5.67	-3.95	4.67e-05	0.00436	98282903	98283832	OR5H2
chr1	224413992	224415278	-0.25	4.86	-5.11	4.68e-05	0.00436	224385666	224411484	WDR26
chr11	123080405	123081687	-0.25	4.85	-5.1	4.69e-05	0.00436	123073485	123083736	CLMP
chr19	21817861	21819310	-0.25	4.88	-5.13	4.7e-05	0.00436	21809479	21836187	ZNF43
chr6	21600619	21603240	0.44	6.25	-5.81	4.7e-05	0.00436	21593751	21598619	SOX4
chr12	56534775	56535539	0.9	5.25	-4.34	4.7e-05	0.00436	56521999	56589595	RBMS2
chr2	160345395	160346439	-0.25	5.13	-5.38	4.72e-05	0.00436	160272152	160367526	RBMS1
chr5	146131303	146142951	4.03	8.36	-4.33	4.72e-05	0.00436	146113911	146132626	LARS1
chr4	75741209	75742322	0.72	5.16	-4.44	4.73e-05	0.00436	75724598	75814286	USO1
chr1	246983720	246984512	0.46	5.03	-4.57	4.73e-05	0.00436	246945549	247007999	ZNF695
chr3	51666787	51667475	0.69	5.11	-4.42	4.74e-05	0.00436	51671175	51704018	TEX264
chrX	119832206	119832982	-0.25	4.82	-5.07	4.74e-05	0.00436	119805311	119837932	UPF3B
chr7	106275496	106282556	2.24	6.77	-4.53	4.75e-05	0.00437	106269155	106284632	NAMPT
chr7	77853957	77856547	1.54	5.85	-4.31	4.76e-05	0.00437	77840180	77957222	PHTF2
chr1	232149853	232153169	-0.25	5.01	-5.26	4.79e-05	0.00439	231925834	231945233	DISC1-IT1
chr1	150647582	150648741	-0.25	4.87	-5.12	4.79e-05	0.00439	150621251	150629596	ENSA
chr19	45469649	45470954	-0.25	4.96	-5.21	4.79e-05	0.00439	45469876	45474597	FOSB
chr7	101298809	101302413	0.9	6.54	-5.64	4.8e-05	0.00439	101299578	101301346	LNCPRESS1
chr18	51057582	51059340	1.21	5.31	-4.1	4.8e-05	0.00439	51058353	51079143	SMAD4
chr17	64507156	64514050	2.87	7.3	-4.43	4.85e-05	0.00442	64504755	64507530	DDX5
chr9	125613776	125614500	-0.25	4.76	-5.02	4.85e-05	0.00442	125438655	125595646	MAPKAP1
chr4	37995468	37996529	0.15	4.87	-4.72	4.88e-05	0.00445	37977310	38090065	TBC1D1
chr11	59803018	59803964	-0.25	4.85	-5.1	4.91e-05	0.00447	59807236	59810022	MRPL16
chr9	32394073	32396680	1.58	6.09	-4.51	4.92e-05	0.00447	32384643	32454769	ACO1
chr2	135506949	135508339	1.27	5.38	-4.1	4.93e-05	0.00447	135353321	135530576	ZRANB3
chr12	98547022	98547830	0.44	4.96	-4.52	4.93e-05	0.00447	98544639	98547787	TMPO
chr10	114147057	114148110	-0.25	4.85	-5.11	4.94e-05	0.00447	114124929	114144602	CCDC186
chr13	100325387	100326745	-0.25	5.2	-5.45	4.97e-05	0.00449	100305776	100340259	PCCA
chr17	34132473	34133964	0.69	5.08	-4.39	5.01e-05	0.00452	33013087	34157294	ASIC2
chr1	26411116	26412173	-0.25	4.91	-5.16	5.02e-05	0.00452	26410817	26429728	LIN28A
chr5	16792525	16796093	-0.25	4.95	-5.21	5.04e-05	0.00453	16704579	16758226	MYO10
chr3	52548569	52550148	0.9	5.24	-4.34	5.04e-05	0.00453	52536605	52579237	SMIM4
chr2	48325164	48328154	1.54	5.79	-4.25	5.09e-05	0.00457	48314682	48379295	FOXN2
chr4	70960681	70962219	-0.25	4.83	-5.08	5.1e-05	0.00457	70993563	71030914	DCK
chr4	70972468	70973661	0.69	5.19	-4.5	5.11e-05	0.00457	70993563	71030914	DCK
chr1	233263034	233265731	2.34	6.46	-4.12	5.12e-05	0.00458	233135013	233258152	PCNX2
chr1	161022508	161023814	0.44	4.93	-4.5	5.12e-05	0.00458	160995211	161021343	F11R
chr8	68002863	68004278	-0.25	4.81	-5.07	5.16e-05	0.00461	67952489	68111089	PREX2
chr22	45182406	45187004	1.88	6.21	-4.33	5.2e-05	0.00464	45177699	45185624	NUP50
chr1	20999792	21002061	0.13	5.37	-5.23	5.24e-05	0.00467	20988314	20988432	MIR1256
chr20	3393229	3394232	1.43	5.4	-3.97	5.26e-05	0.00468	3249305	3407625	C20orf194
chr2	203494670	203497171	-0.25	4.87	-5.12	5.26e-05	0.00468	203439437	203495353	RAPH1
chr2	47472645	47473719	0.13	5	-4.87	5.29e-05	0.0047	47476509	47513063	MSH2
chr4	53440291	53442520	0.21	4.9	-4.69	5.3e-05	0.0047	53442253	53453131	FIP1L1
chr22	32613566	32614436	0.21	4.86	-4.65	5.31e-05	0.00471	32527672	32541716	SYN3
chr7	92731937	92733317	-0.25	4.95	-5.2	5.33e-05	0.00472	92671235	92725710	CDK6
chr17	2394782	2396387	0.15	5.19	-5.04	5.36e-05	0.00474	2395330	2396853	MNT
chr8	55891122	55893203	1.27	5.7	-4.44	5.37e-05	0.00475	55902723	55902855	SNORA1B
chr6	108612375	108613965	0.21	4.84	-4.64	5.39e-05	0.00476	108656346	108680751	FOXO3
chr12	68836475	68839573	1.43	5.53	-4.1	5.42e-05	0.00477	68824203	68824758	MDM2
chr2	11292749	11296137	-0.25	5.1	-5.35	5.44e-05	0.00479	11221327	11287737	ROCK2
chr5	160049582	160050411	-0.25	4.84	-5.09	5.46e-05	0.00481	160043133	160065487	TTC1
chr5	116466118	116469069	2.62	6.89	-4.27	5.48e-05	0.00481	116446134	116469544	SEMA6A
chr19	1983605	1984544	0.21	4.93	-4.72	5.53e-05	0.00485	1985438	1988569	BTBD2
chr7	23197671	23198574	-0.25	4.79	-5.04	5.54e-05	0.00485	23199424	23200824	NUP42
chr20	35118646	35120174	1.13	5.37	-4.24	5.54e-05	0.00485	35002404	35092807	TRPC4AP
chr1	180020100	180023074	-0.25	4.84	-5.09	5.55e-05	0.00485	180041203	180053834	CEP350
chr3	143122201	143123141	0.69	5.05	-4.36	5.55e-05	0.00485	143119771	143124014	CHST2
chr8	103438982	103440588	-0.25	4.96	-5.21	5.58e-05	0.00487	103415412	103443450	DCAF13
chr17	63442737	63443451	-0.25	4.71	-4.97	5.58e-05	0.00487	63434403	63442852	CYB561
chr2	17570271	17571227	-0.25	4.75	-5	5.63e-05	0.0049	17541160	17657018	VSNL1
chr16	24920284	24921190	-0.25	4.79	-5.04	5.64e-05	0.0049	24919414	24931023	ARHGAP17
chr4	92906562	92907899	-0.25	4.88	-5.13	5.64e-05	0.0049	92822949	93166161	GRID2
chr19	18767723	18768128	-0.25	4.72	-4.97	5.65e-05	0.0049	18786118	18787035	COMP
chr2	32438346	32439041	-0.25	4.75	-5	5.67e-05	0.00491	32436075	32442380	BIRC6
chr5	176256789	176257455	-0.25	4.71	-4.97	5.68e-05	0.00491	176270230	176290209	SIMC1
chr22	40923365	40924755	0.9	5.18	-4.28	5.68e-05	0.00491	40951347	40964411	RBX1
chr7	77612324	77614747	1.4	5.67	-4.26	5.7e-05	0.00492	77606928	77611046	PTPN12
chr9	115431703	115432814	-0.25	4.74	-4.99	5.7e-05	0.00492	115400346	115401315	2021-12-01
chr3	69048486	69049360	0.83	5.2	-4.37	5.73e-05	0.00493	69048958	69049035	MIR3136
chr5	157821527	157824776	0.69	5.37	-4.68	5.79e-05	0.00498	157791620	157806012	CLINT1
chr1	38847137	38848211	-0.25	4.79	-5.04	5.79e-05	0.00498	38839349	38848074	RRAGC
chr11	27684849	27686885	1.12	5.29	-4.17	5.82e-05	0.00499	27675726	27696422	BDNF-AS
chr20	34861304	34862202	0.44	4.94	-4.5	5.83e-05	0.005	34845013	34852481	GGT7
chr9	27570430	27571718	-0.25	4.79	-5.04	5.84e-05	0.005	27546555	27573448	C9orf72
chr7	131370800	131371723	-0.25	4.87	-5.12	5.85e-05	0.005	131322716	131328312	MKLN1-AS
chr1	196575411	196575974	-0.25	4.88	-5.13	5.85e-05	0.005	196582413	196582481	MIR4735
chr10	27515606	27518101	1.94	5.65	-3.7	5.86e-05	0.005	27504619	27537966	RAB18
chr4	39858236	39859858	0.13	4.87	-4.73	5.87e-05	0.005	39837012	39848561	PDS5A
chr11	45934182	45935725	0.15	4.95	-4.81	5.87e-05	0.005	45933831	45936507	PHF21A
chr5	146283172	146284279	-0.25	4.86	-5.11	5.89e-05	0.00501	146261383	146263519	RBM27
chr3	150581618	150582922	0.9	5.23	-4.32	5.9e-05	0.00501	150572496	150583903	EIF2A
chr6	76592466	76597730	1.87	6.29	-4.42	5.9e-05	0.00501	76521640	76593821	LINC02540
chr7	74403836	74404912	0.46	4.92	-4.46	5.91e-05	0.00501	74400482	74404326	CLIP2
chr6	163547209	163555009	3.01	7.52	-4.52	5.93e-05	0.00502	163566458	163571452	QKI
chr4	40888112	40889436	1.68	5.67	-3.99	5.93e-05	0.00502	40821983	40890425	APBB2
chr18	58391574	58392411	0.72	5.13	-4.41	5.96e-05	0.00503	58390064	58398157	NEDD4L
chr19	48965715	48966926	-0.25	4.75	-5	5.97e-05	0.00503	48965309	48966879	FTL
chr10	96933451	96938279	2.34	6.26	-3.92	5.98e-05	0.00503	96949223	96958515	LCOR
chr9	69719921	69721171	0.9	5.22	-4.31	6e-05	0.00503	69718021	69723571	PTAR1
chr2	121366081	121368363	1.7	5.97	-4.26	6e-05	0.00503	121364119	121388076	CLASP1
chr3	54683350	54684443	-0.25	4.85	-5.1	6.03e-05	0.00505	54632122	54639857	ESRG
chr1	235217069	235219069	-0.25	5.53	-5.79	6.09e-05	0.0051	235177787	235213916	ARID4B
chr6	56713146	56715411	-0.25	4.86	-5.11	6.1e-05	0.0051	56638936	56693303	DST
chr5	134785826	134789167	-0.25	5.53	-5.78	6.11e-05	0.0051	134790153	134829932	DDX46
chr9	123017912	123018632	-0.25	4.71	-4.97	6.14e-05	0.00512	123033509	123074310	RABGAP1
chr16	30587124	30588024	0.13	4.99	-4.86	6.14e-05	0.00512	30578361	30585769	ZNF785
chr12	55967823	55970101	1.91	5.82	-3.91	6.16e-05	0.00513	55967462	55971087	CDK2
chr20	6019299	6021374	1.26	5.53	-4.28	6.18e-05	0.00514	6028271	6034555	CRLS1
chr6	104972071	104972957	0.44	4.92	-4.48	6.2e-05	0.00515	104957107	105083332	LIN28B
chr14	102343498	102344306	-0.25	4.77	-5.02	6.21e-05	0.00516	102336917	102342367	ZNF839
chr5	141663088	141663847	0.7	4.96	-4.26	6.23e-05	0.00517	141653408	141666744	ARAP3
chr10	19849445	19850233	-0.25	4.83	-5.08	6.25e-05	0.00518	19816432	20289856	PLXDC2
chr18	55484990	55487251	2.27	6.12	-3.85	6.26e-05	0.00518	55479221	55479298	MIR4529
chr8	94531919	94537463	2.79	6.85	-4.06	6.33e-05	0.00523	94488520	94526302	VIRMA
chr9	37928891	37930112	0.9	5.18	-4.28	6.35e-05	0.00524	37879400	37904353	SLC25A51
chr5	112747730	112749277	-0.25	4.84	-5.09	6.38e-05	0.00526	112738332	112839508	APC
chr6	122456848	122459480	1.26	5.51	-4.25	6.38e-05	0.00526	122443351	122471807	SERINC1
chr6	25403340	25404716	0.72	5.27	-4.55	6.4e-05	0.00526	25081109	25452184	CMAHP
chr15	79894109	79895555	-0.25	4.96	-5.22	6.4e-05	0.00526	79889092	79896997	MTHFS
chr7	149484998	149487078	2.17	6.01	-3.84	6.41e-05	0.00527	149475378	149477872	ZNF746
chr6	15652267	15653938	-0.25	5.12	-5.37	6.41e-05	0.00527	15523985	15662920	DTNBP1
chr9	111398871	111400077	1.4	5.85	-4.45	6.45e-05	0.00529	111361886	111371788	ECPAS
chr11	8682341	8687867	2.76	7.73	-4.96	6.5e-05	0.00532	8682788	8683779	RPL27A
chr2	182982444	182984027	-0.25	4.88	-5.13	6.53e-05	0.00534	182957141	182964764	NCKAP1
chr18	62766282	62769574	2.17	6.01	-3.83	6.55e-05	0.00535	62779399	62860513	PHLPP1
chr3	121536655	121539654	2.07	6.42	-4.35	6.58e-05	0.00537	121521571	121533210	POLQ
chr7	131432519	131435515	1.26	5.72	-4.47	6.59e-05	0.00537	131463276	131490539	MKLN1
chr16	71662314	71663268	0.9	5.18	-4.28	6.6e-05	0.00538	71637836	71663971	PHLPP2
chr10	110968697	110971524	-0.25	4.71	-4.97	6.62e-05	0.00539	110965032	110985922	SHOC2
chr21	39277590	39278620	1.23	5.29	-4.06	6.64e-05	0.0054	39278497	39280207	BRWD1
chr11	74608709	74610956	-0.25	4.72	-4.97	6.66e-05	0.00541	74604563	74618675	POLD3
chr2	165885536	165886115	-0.25	4.72	-4.97	6.67e-05	0.00541	165879634	165883955	TTC21B
chr3	62221885	62222312	-0.25	4.69	-4.95	6.68e-05	0.00542	62217583	62293551	PTPRG
chr16	4717821	4718717	0.45	4.92	-4.47	6.7e-05	0.00543	4705210	4725122	ANKS3
chr6	144424119	144425520	-0.25	4.68	-4.93	6.71e-05	0.00543	144344101	144426328	UTRN
chr9	121196637	121201605	2.07	6.4	-4.33	6.81e-05	0.0055	121178133	121201869	RAB14
chr9	129054253	129055597	0.94	5.25	-4.31	6.82e-05	0.0055	129060482	129068311	MIGA2
chr3	36998863	37000855	1.13	5.31	-4.18	6.83e-05	0.0055	36994227	37011836	MLH1
chr16	89496495	89498243	1.8	5.81	-4.01	6.86e-05	0.00553	89490917	89557748	SPG7
chr20	45795308	45796859	1.26	5.52	-4.27	6.93e-05	0.00557	45793965	45811427	DNTTIP1
chr12	56418913	56419716	-0.25	4.73	-4.99	6.94e-05	0.00557	56418290	56421090	TIMELESS
chr2	55393370	55394575	-0.25	4.74	-4.99	6.95e-05	0.00558	55335049	55394645	CCDC88A
chr5	55974518	55975720	-0.25	5.25	-5.5	6.98e-05	0.00559	55941082	55976278	IL6ST
chr1	53024594	53025744	0.13	4.83	-4.69	6.99e-05	0.0056	53014974	53051610	SCP2
chr19	17513648	17514411	0.44	4.96	-4.52	6.99e-05	0.0056	17515742	17521030	PGLS
chr4	87966634	87967663	0.13	4.75	-4.61	7.02e-05	0.00561	87975650	87983410	SPP1
chr1	152033194	152033945	0.69	5	-4.31	7.06e-05	0.00564	152032506	152037004	S100A11
chr21	39265808	39266919	-0.25	4.7	-4.96	7.08e-05	0.00565	39187246	39264941	BRWD1
chr14	30720148	30721718	0.21	5.56	-5.35	7.18e-05	0.00572	30721702	30735662	SCFD1
chr11	46098781	46102252	0.69	5.27	-4.58	7.18e-05	0.00572	45971348	46092205	PHF21A
chr1	31348751	31350126	0.15	4.87	-4.72	7.2e-05	0.00573	31365713	31369590	FABP3
chr8	26400999	26402766	0.72	5.11	-4.39	7.29e-05	0.00579	26395617	26410519	BNIP3L
chr22	28826971	28827767	-0.25	4.72	-4.97	7.3e-05	0.00579	28794555	28800597	XBP1
chr7	157254034	157255177	0.15	4.76	-4.61	7.3e-05	0.00579	157256687	157267676	UBE3C
chr1	209963178	209964729	-0.25	4.77	-5.03	7.31e-05	0.00579	209952724	210164291	SYT14
chr12	71783667	71785985	0.44	5.09	-4.65	7.33e-05	0.0058	71782414	71785689	RAB21
chr11	75907654	75909297	-0.25	4.67	-4.92	7.38e-05	0.00583	75911979	75916784	UVRAG
chr21	26072739	26078061	2.46	7.14	-4.68	7.38e-05	0.00583	26051160	26068338	APP
chr6	106310073	106315058	2.77	6.46	-3.69	7.41e-05	0.00585	106186540	106316208	ATG5
chr1	160289750	160290996	1.29	5.46	-4.17	7.44e-05	0.00586	160282071	160286348	PEX19
chr6	45261945	45262664	-0.25	4.66	-4.91	7.45e-05	0.00587	45197674	45197770	MIR586
chr12	19297332	19299680	0.69	5.09	-4.4	7.47e-05	0.00587	19283637	19320585	PLEKHA5
chr12	76482301	76484082	1.06	5.23	-4.16	7.49e-05	0.00588	76397856	76486108	OSBPL8
chr10	98188222	98189434	-0.25	4.66	-4.91	7.49e-05	0.00588	98163287	98244894	R3HCC1L
chr11	10264085	10265066	-0.25	4.68	-4.93	7.51e-05	0.00589	9778667	10294207	SBF2
chr16	67534616	67536687	1.4	5.68	-4.28	7.56e-05	0.00591	67537454	67546788	RIPOR1
chr6	114432835	114435007	-0.25	4.96	-5.21	7.56e-05	0.00591	114055586	114343045	HS3ST5
chr10	68939408	68940801	-0.25	4.89	-5.15	7.56e-05	0.00591	68956170	68985068	DDX21
chr3	72016630	72018034	1.06	5.36	-4.3	7.57e-05	0.00591	72035756	72037530	LINC00877
chr9	110059576	110062824	1.77	5.95	-4.17	7.58e-05	0.00591	110048698	110168633	PALM2AKAP2
chr5	75444018	75444855	-0.25	4.95	-5.2	7.64e-05	0.00595	75417011	75426438	CERT1
chr8	103692371	103692909	-0.25	4.65	-4.9	7.65e-05	0.00595	103766227	103768501	RIMS2
chr2	207577350	207581041	2.25	6.18	-3.93	7.66e-05	0.00595	207576636	207597458	CREB1
chr9	132289015	132290631	0.9	5.2	-4.3	7.66e-05	0.00595	132282770	132286497	SETX
chr5	7430682	7433205	2.69	6.29	-3.6	7.67e-05	0.00595	7414664	7658206	ADCY2
chr13	50647234	50647744	-0.25	4.82	-5.07	7.67e-05	0.00595	50678157	50906856	DLEU7-AS1
chr2	45531731	45532468	-0.25	4.81	-5.06	7.67e-05	0.00595	45418455	45549072	SRBD1
chr18	3455703	3459750	2.57	7.19	-4.62	7.69e-05	0.00595	3455414	3458411	TGIF1
chr9	614854	616276	-0.25	4.69	-4.94	7.69e-05	0.00595	547318	549531	KANK1
chr4	78785269	78789985	-0.25	4.73	-4.98	7.74e-05	0.00597	78776378	78912185	BMP2K
chr18	51172950	51174466	0.69	5.05	-4.36	7.74e-05	0.00597	51174552	51197320	MEX3C
chr1	180497375	180500526	-0.25	4.83	-5.08	7.74e-05	0.00597	180288230	180502577	ACBD6
chr1	39001876	39006620	2.15	6.64	-4.48	7.86e-05	0.00605	38991496	39004381	AKIRIN1
chr2	69034006	69034694	-0.25	4.69	-4.94	7.87e-05	0.00605	69013397	69172558	ANTXR1
chr6	138603040	138605454	-0.25	4.91	-5.16	7.88e-05	0.00605	138422043	138572540	NHSL1
chr19	54991174	54991845	-0.25	4.66	-4.91	7.9e-05	0.00606	54993218	55001138	NLRP2
chr4	437674	438859	0.21	4.82	-4.61	7.93e-05	0.00608	425815	474051	ABCA11P
chr17	29508943	29510423	0.21	4.79	-4.59	7.93e-05	0.00608	29522288	29530738	TAOK1
chr16	75149582	75151728	1.4	5.56	-4.15	7.95e-05	0.00609	75149051	75169326	ZFP1
chr4	183222895	183223966	0.13	4.94	-4.81	7.97e-05	0.0061	183208979	183318303	WWC2
chr3	58498174	58499952	1.88	6.06	-4.18	7.98e-05	0.0061	58498428	58501092	KCTD6
chr1	24359593	24360889	-0.25	4.68	-4.93	7.98e-05	0.0061	24342160	24343275	GRHL3
chr19	33480720	33481936	-0.25	4.63	-4.88	8e-05	0.0061	33387959	33487080	PEPD
chr2	85407863	85408558	-0.25	4.67	-4.92	8.02e-05	0.00611	85398690	85408815	CAPG
chr15	42218579	42219886	0.13	4.8	-4.66	8.04e-05	0.00612	42211139	42218006	TMEM87A
chr1	62196527	62197825	0.9	5.29	-4.39	8.05e-05	0.00612	62194849	62212328	L1TD1
chr6	99527299	99528094	-0.25	4.65	-4.9	8.05e-05	0.00612	99508726	99521728	USP45
chr15	66341978	66343012	-0.25	4.74	-4.99	8.08e-05	0.00614	66347207	66347342	SCARNA14
chr8	27832823	27834105	-0.25	4.69	-4.94	8.11e-05	0.00615	27810294	27837783	PBK
chr9	82830898	82833660	-0.25	5.44	-5.7	8.13e-05	0.00616	82979590	83063142	RASEF
chr6	89714256	89717166	2.15	6.57	-4.42	8.14e-05	0.00616	89673469	89675783	LOC101929057
chr5	98888480	98890397	-0.25	4.69	-4.94	8.18e-05	0.00619	98881247	98888186	CHD1
chr3	56559808	56561203	1.26	5.47	-4.21	8.18e-05	0.00619	56558855	56561222	CCDC66
chr12	70370087	70371674	-0.25	5.01	-5.26	8.2e-05	0.00619	70366290	70434292	KCNMB4
chr2	69361591	69365343	1.92	6.13	-4.21	8.22e-05	0.0062	69350098	69363592	GFPT1
chr2	196693548	196696347	2.21	6.03	-3.82	8.23e-05	0.0062	196695043	196729528	CCDC150
chr2	108624007	108625536	-0.25	4.73	-4.98	8.24e-05	0.0062	108621273	108673953	LIMS1
chr6	99431513	99432215	0.13	4.83	-4.7	8.25e-05	0.0062	99399964	99425331	PNISR
chr6	154805851	154807737	0.83	5.07	-4.23	8.33e-05	0.00626	154832697	155257723	TIAM2
chr6	76565980	76569110	2.24	6.61	-4.38	8.34e-05	0.00626	76522451	76593623	LINC02540
chr12	51678285	51679189	-0.25	4.68	-4.94	8.35e-05	0.00626	51686423	51745948	SCN8A
chr9	100491459	100493577	-0.25	4.74	-4.99	8.37e-05	0.00627	100473149	100577636	TMEFF1
chr2	135868748	135869456	0.55	5.06	-4.51	8.39e-05	0.00628	135844608	135865051	MCM6
chr8	35271890	35272876	0.44	5.33	-4.89	8.43e-05	0.0063	35235775	35791208	UNC5D
chr2	165763799	165766122	0.9	5.48	-4.58	8.44e-05	0.00631	165757068	165764959	GALNT3
chr12	32327491	32328894	1.2	5.19	-3.99	8.45e-05	0.00631	32328402	32333065	BICD1
chr10	45548250	45550693	1.43	5.34	-3.91	8.46e-05	0.00631	45457506	45535371	MARCHF8
chr6	97774818	97775585	0.13	4.73	-4.59	8.47e-05	0.00632	97627071	97708917	LOC101927314
chr4	145039516	145040715	-0.25	4.63	-4.89	8.48e-05	0.00632	145064572	145097382	ANAPC10
chr3	183361903	183362779	-0.25	4.72	-4.98	8.59e-05	0.00639	183298427	183400493	MCF2L2
chr2	24510013	24510831	0.69	5.05	-4.36	8.61e-05	0.0064	24492058	24770702	NCOA1
chr5	147637720	147642394	0.83	5.82	-4.99	8.62e-05	0.0064	147632679	147644199	JAKMIP2
chr12	6338539	6340740	1.7	5.94	-4.23	8.67e-05	0.00644	6331240	6341848	TNFRSF1A
chr1	31342697	31343454	0.44	4.87	-4.43	8.68e-05	0.00644	31365713	31369590	FABP3
chr9	82850011	82852620	2.87	6.42	-3.55	8.71e-05	0.00645	82979590	83063142	RASEF
chr7	24916584	24918914	-0.25	4.68	-4.93	8.75e-05	0.00648	24870775	24918093	OSBPL3
chr1	90927813	90931121	1.7	5.9	-4.19	8.8e-05	0.00651	90916490	90935528	ZNF644
chr10	20425165	20427845	1.82	5.95	-4.14	8.83e-05	0.00652	20551970	20552046	MIR4675
chr8	73679283	73679810	0.46	4.83	-4.37	8.84e-05	0.00653	73420369	73738327	STAU2
chr3	195406669	195408582	1.26	5.4	-4.15	8.87e-05	0.00654	195342606	195442276	ACAP2
chr6	135024205	135025640	0.15	4.75	-4.6	8.87e-05	0.00654	134987654	135027156	HBS1L
chr15	42518165	42519928	1.88	6.03	-4.15	8.87e-05	0.00654	42515237	42545356	SNAP23
chr3	123010670	123012196	0.94	5.18	-4.24	8.91e-05	0.00656	122943437	123027578	SEMA5B
chr4	16036871	16038708	1.09	5.3	-4.21	8.92e-05	0.00656	16018301	16038014	PROM1
chr2	106147053	106148012	-0.25	4.62	-4.87	8.97e-05	0.00658	106093604	106138881	UXS1
chr12	837128	841279	1.92	6.08	-4.16	8.97e-05	0.00658	829925	861135	WNK1
chr15	24993646	24995308	-0.25	4.65	-4.9	9e-05	0.00659	25000305	25020825	SNHG14
chr3	188380682	188381389	-0.25	4.73	-4.99	9.03e-05	0.00661	188341663	188609279	LPP
chr9	125802390	125803350	0.94	5.15	-4.21	9.04e-05	0.00661	125843713	125965940	PBX3
chr3	197060319	197060974	-0.25	4.63	-4.88	9.07e-05	0.00662	197065709	197069482	DLG1
chr22	35813740	35814700	-0.25	4.61	-4.86	9.11e-05	0.00664	35743958	35810004	RBFOX2
chr9	85711471	85715636	2.24	6.55	-4.31	9.15e-05	0.00667	85657438	85692792	AGTPBP1
chr17	16100423	16101727	1.06	5.19	-4.13	9.16e-05	0.00667	16086399	16091918	NCOR1
chr19	36719312	36720234	0.72	5.04	-4.32	9.16e-05	0.00667	36712482	36727701	ZNF567
chr8	118618341	118619178	-0.25	4.76	-5.01	9.22e-05	0.0067	118620498	118906091	SAMD12-AS1
chr17	16258118	16258723	-0.25	4.61	-4.86	9.24e-05	0.00671	16282014	16282088	MIR1288
chr16	19880457	19881743	1.93	5.67	-3.74	9.27e-05	0.00672	19872313	19882360	GPRC5B
chr20	36331019	36331574	-0.25	4.62	-4.88	9.27e-05	0.00672	36306381	36528633	DLGAP4
chr16	72639849	72640538	-0.25	4.74	-4.99	9.3e-05	0.00673	72518418	72627732	LINC01572
chr6	169702400	169705991	2.07	6.29	-4.22	9.3e-05	0.00673	169702190	169704856	C6orf120
chr11	74825357	74826239	0.13	4.83	-4.69	9.34e-05	0.00674	74848125	74852064	XRRA1
chr11	108193675	108196673	1.82	6	-4.18	9.34e-05	0.00674	108158793	108170201	NPAT
chr1	222636650	222638458	0.69	4.94	-4.25	9.35e-05	0.00674	222644303	222665823	MIA3
chr7	107916394	107918161	0.44	4.85	-4.41	9.36e-05	0.00674	107904668	107906369	DLD
chr13	110693423	110694277	-0.25	5.03	-5.28	9.37e-05	0.00674	110641443	110683139	CARS2
chr7	66497058	66499018	1.27	5.44	-4.18	9.37e-05	0.00674	66493786	66495472	GS1-124K5.4
chr14	103519024	103522717	2.24	6.55	-4.32	9.38e-05	0.00674	103519668	103521322	CKB
chr2	171404228	171409924	0.69	5.38	-4.69	9.38e-05	0.00674	171325891	171392185	METTL8
chr1	246973918	246975002	-0.25	4.75	-5	9.39e-05	0.00675	246945549	247007999	ZNF695
chr7	24347926	24349807	1.88	5.91	-4.03	9.44e-05	0.00678	24285107	24291824	NPY
chr7	150407563	150409043	1.8	5.55	-3.76	9.48e-05	0.0068	150405774	150410599	LOC728743
chr16	22030461	22033997	2.32	6.32	-4	9.5e-05	0.00681	22008311	22080797	MOSMO
chr4	77907738	77909000	0.9	5.11	-4.21	9.53e-05	0.00682	77908325	77952783	MRPL1
chr2	72712883	72715866	-0.25	4.67	-4.92	9.55e-05	0.00683	72496454	72826005	EXOC6B
chr14	81421270	81422494	0.13	4.87	-4.73	9.56e-05	0.00683	81394950	81418253	STON2
chr21	33779434	33781231	-0.25	5.08	-5.33	9.57e-05	0.00683	33774363	33775079	ITSN1
chr12	79592574	79594102	1.4	5.5	-4.1	9.59e-05	0.00684	79584879	79596534	PAWR
chr18	8752074	8756262	2.15	6.45	-4.3	9.59e-05	0.00684	8782088	8810002	MTCL1
chr9	107327985	107330006	0.69	5.08	-4.39	9.61e-05	0.00684	107306542	107332189	RAD23B
chr7	93667412	93669294	-0.25	4.68	-4.94	9.62e-05	0.00685	93716928	93717005	MIR4652
chr9	36336631	36338274	-0.25	4.6	-4.85	9.63e-05	0.00685	36214441	36277056	GNE
chr5	98876330	98879000	-0.25	5.38	-5.63	9.65e-05	0.00685	98855204	98872557	CHD1
chr22	40519036	40520729	0.72	5.29	-4.57	9.67e-05	0.00686	40521800	40526707	MRTFA-AS1
chr6	63574449	63578565	2.07	6.35	-4.28	9.68e-05	0.00686	63576488	63581462	PTP4A1
chr14	75059212	75061909	-0.25	5.05	-5.3	9.75e-05	0.0069	75059848	75064007	ACYP1
chr4	169220499	169221427	-0.25	4.61	-4.87	9.77e-05	0.00692	169116269	169269093	SH3RF1
chr4	56162219	56163256	-0.25	4.79	-5.04	9.81e-05	0.00692	56170195	56328625	CRACD
chr9	112706149	112707542	0.44	5.01	-4.57	9.81e-05	0.00692	112687132	112718086	INIP
chr2	45429622	45430585	-0.25	4.71	-4.96	9.84e-05	0.00694	45388776	45448095	SRBD1
chr15	40997455	40998514	-0.25	4.82	-5.07	9.87e-05	0.00695	40984344	40997710	INO80
chr8	53820450	53823834	-0.25	5.35	-5.6	9.88e-05	0.00696	53795750	53817503	ATP6V1H
chr20	41085787	41087337	0.15	4.74	-4.59	9.91e-05	0.00697	41136960	41175721	PLCG1
chr15	92897062	92899559	1.06	5.27	-4.2	9.93e-05	0.00698	92900189	93022162	CHD2
chr12	25239331	25241072	1.7	5.81	-4.11	9.94e-05	0.00698	25205246	25250929	KRAS
chr4	86932042	86932590	-0.25	4.63	-4.88	9.95e-05	0.00698	86933165	86934542	AFF1-AS1
chr18	21781594	21786249	1.99	6.28	-4.29	0.000101	0.00706	21798084	21819558	MIB1
chr1	25434782	25436529	-0.25	4.58	-4.83	0.000101	0.00706	25430960	25499230	MACO1
chr22	32870922	32872502	0.69	5.05	-4.36	0.000101	0.00706	32629606	32869100	SYN3
chr4	119465413	119466120	-0.25	4.66	-4.91	0.000102	0.00711	119460437	119461910	LOC645513
chr19	12398046	12398644	0.15	4.68	-4.53	0.000102	0.00713	12390016	12400980	ZNF799
chr4	183237591	183239862	1.98	6.16	-4.18	0.000102	0.00713	183233628	183240634	WWC2-AS1
chr20	58889812	58890493	-0.25	4.85	-5.1	0.000102	0.00713	58889881	58903585	GNAS
chr2	39412957	39414951	1.6	5.77	-4.17	0.000102	0.00713	39436530	39601410	MAP4K3-DT
chr6	113860843	113863141	-0.25	4.77	-5.02	0.000102	0.00714	113857345	113863475	MARCKS
chr18	57574112	57575401	-0.25	4.6	-4.86	0.000103	0.00714	57549569	57586391	FECH
chr1	21746898	21747889	-0.25	4.72	-4.97	0.000103	0.00715	21728612	21748191	USP48
chr3	183449895	183452640	1.69	5.9	-4.21	0.000103	0.00717	183451741	183455335	LINC00888
chr1	100116848	100117652	-0.25	4.6	-4.85	0.000103	0.00717	100083570	100132930	SASS6
chr19	14107299	14108384	0.46	4.89	-4.43	0.000103	0.00717	14097248	14107404	PRKACA
chr2	175122308	175124782	-0.25	4.62	-4.88	0.000104	0.00718	175074392	175130205	ATF2
chr12	107008170	107009433	-0.25	4.66	-4.91	0.000104	0.00718	106999789	107001851	CRY1
chr3	43365309	43366071	-0.25	4.68	-4.93	0.000104	0.00721	43346923	43352152	SNRK-AS1
chr2	174160658	174169412	2.84	6.99	-4.15	0.000104	0.00721	174075409	174124315	OLA1
chr4	55509574	55511055	-0.25	4.6	-4.85	0.000104	0.00721	55427903	55510027	CLOCK
chr4	92440471	92444284	1.91	5.67	-3.76	0.000105	0.00721	92304657	93772498	GRID2
chr2	138504744	138506810	1.92	5.81	-3.89	0.000105	0.00721	138501932	138552582	SPOPL
chr8	73699622	73702208	1.09	5.34	-4.25	0.000105	0.00721	73420369	73738327	STAU2
chr22	17834360	17835578	0.44	4.86	-4.42	0.000105	0.00723	17819022	17832000	MICAL3
chr5	90565060	90569272	-0.25	4.71	-4.96	0.000105	0.00723	90558837	90627945	ADGRV1
chr4	173332109	173332897	0.44	4.85	-4.41	0.000106	0.00725	173331701	173333672	HMGB2
chr6	143681077	143684809	2.31	6.68	-4.37	0.000106	0.00726	143678173	143712336	PHACTR2
chr15	42758501	42760129	0.72	5	-4.28	0.000106	0.00727	42723544	42737128	CDAN1
chr9	15470063	15474129	-0.25	5.41	-5.66	0.000106	0.00727	15470990	15472750	PSIP1
chr2	169695452	169696526	-0.25	4.64	-4.89	0.000106	0.00727	169695214	169698300	PHOSPHO2
chr7	129844854	129845843	0.21	4.91	-4.7	0.000106	0.00727	129834978	129839741	UBE2H
chr9	34452963	34455008	1.42	5.29	-3.88	0.000106	0.00727	34457414	34488537	DNAI1
chr8	42905391	42907594	1.4	5.53	-4.12	0.000106	0.00727	42887728	42897290	RNF170
chr9	137088322	137088814	-0.25	4.61	-4.86	0.000106	0.00727	137089181	137109181	MAN1B1
chr2	68216434	68218099	-0.25	4.71	-4.96	0.000107	0.00728	68180947	68251148	PPP3R1
chr21	33571580	33573162	-0.25	4.63	-4.88	0.000107	0.00728	33571735	33576447	SON
chr16	89258690	89259313	-0.25	4.69	-4.94	0.000107	0.00729	89274735	89275118	ANKRD11
chr2	147972910	147976678	0.44	4.96	-4.52	0.000107	0.0073	147951448	147972829	ORC4
chr3	170298687	170299524	1.4	5.48	-4.08	0.000108	0.00734	170293347	170297328	PRKCI
chr11	107853951	107854741	0.13	4.72	-4.58	0.000108	0.00734	107792615	107858561	SLC35F2
chr2	63553898	63556131	-0.25	4.73	-4.98	0.000108	0.00735	63437457	63588266	WDPCP
chr14	88575234	88576156	-0.25	4.67	-4.92	0.000108	0.00735	88574813	88586735	ZC3H14
chr15	20665824	20666651	-0.25	4.7	-4.96	0.000109	0.00737	20664725	20671271	NBEAP1
chr4	150948925	150950252	-0.25	4.57	-4.82	0.000109	0.00737	150264853	151015224	LRBA
chr5	44814899	44816953	1.06	5.27	-4.21	0.000109	0.00738	44811985	44813629	MRPS30
chr4	75700522	75701807	-0.25	4.67	-4.92	0.000109	0.0074	75658843	75724375	G3BP2
chr5	56930409	56931171	-0.25	4.73	-4.98	0.000109	0.0074	56935744	56938971	MIER3
chr19	13389068	13390518	1.09	5.34	-4.25	0.00011	0.0074	13307347	13365459	CACNA1A
chr8	103430520	103432677	-0.25	4.56	-4.81	0.00011	0.00745	103415412	103443450	DCAF13
chr4	39512427	39513456	-0.25	4.61	-4.86	0.000111	0.00746	39498788	39526557	UGDH
chr14	39182352	39182999	-0.25	4.85	-5.1	0.000111	0.00748	39179090	39182750	PNN
chr3	176296181	176297073	-0.25	4.62	-4.88	0.000111	0.00748	176515103	176515151	MIR7977
chr6	57143619	57145807	0.21	4.69	-4.48	0.000111	0.00748	57152157	57154160	ZNF451
chr5	50744360	50746873	1.29	5.43	-4.14	0.000112	0.00749	50667893	50842342	PARP8
chr11	63755362	63757627	1.79	5.69	-3.91	0.000112	0.00749	63764182	63765952	C11orf95
chr1	90902208	90903707	0.21	4.73	-4.53	0.000112	0.00751	90916791	90918391	ZNF644
chr18	9824051	9825118	0.44	4.88	-4.44	0.000112	0.00752	9814721	9845679	RAB31
chr10	122862887	122864010	0.13	4.65	-4.52	0.000113	0.00755	122832167	122855773	FAM24B-CUZD1
chr3	15727967	15729361	1.29	5.45	-4.16	0.000113	0.00756	15709668	15721122	ANKRD28
chr1	36388066	36389628	-0.25	4.7	-4.96	0.000114	0.00756	36339624	36385896	STK40
chr6	27141587	27143259	1.7	5.82	-4.11	0.000114	0.00756	27138588	27139881	H4C9
chr1	121235427	121237877	1.26	5.39	-4.13	0.000114	0.00756	121187102	121387966	SRGAP2C
chr5	36880583	36882823	1.44	5.48	-4.04	0.000114	0.00757	36876841	37065394	NIPBL
chr5	62575045	62576842	-0.25	4.78	-5.03	0.000114	0.00758	62578819	62581446	LRRC70
chr2	181010945	181015165	2.39	6.54	-4.15	0.000115	0.0076	180984006	181062920	UBE2E3
chr17	32792643	32793829	-0.25	4.64	-4.89	0.000115	0.0076	32727587	32760396	MYO1D
chr10	96959904	96961625	-0.25	4.7	-4.95	0.000115	0.0076	96949223	96958515	LCOR
chr5	94180148	94182570	-0.25	4.74	-4.99	0.000115	0.00761	93621081	94111699	FAM172A
chr7	80211524	80212051	-0.25	4.64	-4.89	0.000115	0.00761	80210112	80217812	GNAI1
chr3	53096039	53096897	1.13	5.21	-4.09	0.000115	0.00761	52969119	53099453	SFMBT1
chr3	139355044	139356824	1.44	5.5	-4.05	0.000116	0.00763	139357823	139358743	COPB2
chr1	51465267	51465933	-0.25	4.9	-5.16	0.000116	0.00763	51458396	51465326	EPS15
chr11	62781214	62784532	2.24	6.51	-4.28	0.000116	0.00764	62781726	62782333	TAF6L
chr4	151538373	151539974	1.27	5.24	-3.97	0.000116	0.00765	151533012	151663628	FAM160A1
chr11	73575581	73575978	-0.25	4.59	-4.84	0.000116	0.00765	73412252	73598097	FAM168A
chr5	69425812	69427716	0.9	5.29	-4.38	0.000117	0.00768	69419386	69442061	MARVELD2
chr6	116273804	116274516	0.92	4.96	-4.04	0.000117	0.00768	116279143	116401272	DSE
chr2	46742226	46750819	3.2	7.32	-4.12	0.000117	0.00768	46699295	46763129	SOCS5
chr3	172212850	172213277	-0.25	4.54	-4.79	0.000118	0.00771	172126974	172251456	FNDC3B
chr4	84957391	84959535	0.44	4.89	-4.45	0.000118	0.00773	84965534	85008734	WDFY3-AS2
chr1	86707351	86709157	-0.25	4.71	-4.96	0.000118	0.00775	86704895	86743268	SH3GLB1
chr9	82874089	82881427	3.71	8.37	-4.66	0.000119	0.00776	82979590	83063142	RASEF
chr19	23752568	23753849	1.26	5.33	-4.07	0.000119	0.00777	23744964	23758837	ZNF681
chr12	45225010	45225857	-0.25	4.75	-5	0.000119	0.00777	45216120	45313512	ANO6
chr1	34135950	34137655	2.08	5.86	-3.78	0.00012	0.0078	33513999	34165274	CSMD2
chr11	65194349	65195953	1.44	5.47	-4.03	0.00012	0.00781	65188245	65188689	CAPN1
chr1	61864558	61865401	-0.25	4.58	-4.83	0.00012	0.00784	61864431	61865611	PATJ
chr18	34520730	34521745	-0.25	4.69	-4.94	0.000121	0.00787	34493903	34794247	DTNA
chr11	9869410	9870923	-0.25	4.54	-4.79	0.000121	0.00787	9808912	9839603	SBF2
chr11	87044546	87045258	-0.25	4.55	-4.8	0.000122	0.0079	87037985	87277448	TMEM135
chr19	11134642	11135620	0.15	4.8	-4.65	0.000122	0.00792	11147134	11155761	SPC24
chr11	9487080	9497324	1.66	6.07	-4.41	0.000123	0.00794	9512497	9525479	ZNF143
chr4	114490055	114491878	0.46	4.97	-4.51	0.000123	0.00794	114598770	114623305	UGT8
chr1	72866105	72867030	-0.25	4.59	-4.84	0.000123	0.00795	73305609	73307576	LINC01360
chr19	499689	500448	0.15	4.71	-4.57	0.000124	0.008	497817	498727	MADCAM1
chr7	92315914	92317620	0.13	4.81	-4.67	0.000124	0.00801	92319422	92319966	ANKIB1
chr16	69698071	69700129	-0.25	4.57	-4.82	0.000124	0.00801	69690544	69692053	NFAT5
chr10	45879934	45882271	-0.25	4.82	-5.07	0.000125	0.00806	45854093	45892483	PARGP1-AGAP4
chr9	131632896	131633925	-0.25	4.61	-4.86	0.000125	0.00807	131602114	131625948	RAPGEF1
chr14	49644754	49645948	0.55	5.31	-4.76	0.000125	0.00807	49643564	49647360	POLE2
chr5	113571897	113573198	-0.25	4.73	-4.98	0.000126	0.00812	113565719	113579666	YTHDC2
chr3	176349682	176352161	1.82	5.76	-3.94	0.000126	0.00812	176515103	176515151	MIR7977
chr3	57884542	57885451	1.09	5.28	-4.19	0.000127	0.00814	57889991	57912518	SLMAP
chr19	41907839	41908628	1.09	5.2	-4.11	0.000127	0.00814	41906576	41907452	ARHGEF1
chr5	75489342	75490850	-0.25	4.66	-4.91	0.000127	0.00814	75371121	75506004	CERT1
chr8	71699748	71704027	2.67	6.61	-3.94	0.000127	0.00814	71530872	71592025	EYA1
chr1	40460346	40461900	1.26	5.31	-4.05	0.000128	0.00815	40450476	40463715	ZFP69B
chr9	69733297	69734663	0.46	4.81	-4.35	0.000128	0.00815	69731932	69734258	PTAR1
chr3	129725882	129726670	-0.25	4.61	-4.86	0.000128	0.00815	129647792	129688732	TMCC1
chr16	4903556	4904062	-0.25	4.64	-4.89	0.000128	0.00815	4892755	4893821	PPL
chr4	7843124	7844017	-0.25	4.54	-4.79	0.000128	0.00816	7842688	7843837	AFAP1
chr20	37873814	37874368	0.13	4.68	-4.55	0.000128	0.00817	37847858	37872129	CTNNBL1
chr21	15751975	15752634	-0.25	4.66	-4.91	0.000129	0.00817	15773256	15818729	USP25
chr21	42981047	42982274	1.68	5.42	-3.74	0.000129	0.00819	42974662	43018051	PKNOX1
chr9	111390353	111391783	1.8	5.56	-3.76	0.000129	0.00821	111361886	111371788	ECPAS
chr2	206279028	206280162	-0.25	4.55	-4.8	0.000129	0.00821	206279560	206313196	ZDBF2
chr10	11128078	11128700	-0.25	4.61	-4.86	0.00013	0.00821	11097282	11105773	CELF2-AS2
chr15	42895340	42896607	-0.25	4.58	-4.84	0.00013	0.00823	42829941	42908275	TTBK2
chr8	127792132	127793832	-0.25	5.11	-5.36	0.00013	0.00823	127794526	128101256	PVT1
chr4	92755004	92755591	-0.25	4.55	-4.8	0.00013	0.00823	92822949	93112247	GRID2
chr6	107367588	107369006	0.69	4.96	-4.27	0.00013	0.00824	107152562	107459564	PDSS2
chr16	71741331	71741787	-0.25	4.62	-4.87	0.000131	0.00826	71731883	71747396	AP1G1
chr1	227161794	227165195	-0.25	4.59	-4.85	0.000131	0.00826	227111984	227112799	CDC42BPA
chr16	67038781	67040239	-0.25	4.57	-4.82	0.000131	0.00826	67036427	67066962	CBFB
chr2	62731985	62734014	0.9	5.02	-4.11	0.000132	0.0083	62707192	63045500	EHBP1
chr5	55351307	55352161	-0.25	5.13	-5.38	0.000132	0.0083	55327530	55343372	MTREX
chr10	15856618	15858194	0.15	4.89	-4.74	0.000132	0.0083	15778170	15860498	MINDY3
chr1	223791305	223792802	-0.25	4.59	-4.85	0.000132	0.0083	223780645	223800726	TP53BP2
chr8	79975968	79976668	-0.25	4.56	-4.81	0.000132	0.0083	79957803	80003148	MRPS28
chr6	105008756	105013700	2.15	6.34	-4.18	0.000133	0.00835	104957107	105083332	LIN28B
chr1	108186358	108187230	1.37	5.21	-3.84	0.000133	0.00835	108134823	108192818	SLC25A24
chr11	108190767	108192025	-0.25	4.75	-5	0.000133	0.00835	108158793	108170201	NPAT
chr7	80166794	80171512	2.15	6.31	-4.15	0.000134	0.00836	80184104	80217988	GNAI1
chr18	26262990	26264483	1.26	5.35	-4.1	0.000134	0.00838	26226883	26391683	TAF4B
chr2	149574483	149575432	-0.25	4.54	-4.79	0.000134	0.00838	149587196	149848233	MMADHC-DT
chr19	57432862	57434014	0.55	5.01	-4.46	0.000135	0.00841	57435325	57447101	ZNF749
chr8	91013090	91014840	-0.25	4.7	-4.95	0.000136	0.0085	91024302	91040749	PIP4P2
chr7	105477156	105478403	0.13	4.69	-4.56	0.000137	0.00852	105470286	105472188	PUS7
chr8	103600296	103601356	-0.25	4.68	-4.93	0.000137	0.00853	103398658	103501895	SLC25A32
chr1	150649134	150651186	1.54	5.64	-4.1	0.000137	0.00853	150621251	150629596	ENSA
chr15	58788284	58790820	1.88	5.95	-4.07	0.000137	0.00853	58796077	58831819	MINDY2
chr15	57291409	57292335	1.64	5.39	-3.75	0.000137	0.00853	57300365	57301502	LINC00926
chr9	26884536	26885652	-0.25	4.52	-4.78	0.000138	0.00855	26869926	26887478	CAAP1
chr14	102380057	102381522	1.13	5.16	-4.04	0.000138	0.00856	102363079	102465671	TECPR2
chr2	187944253	187946376	-0.25	5.21	-5.46	0.000138	0.00858	188227820	188287634	LINC01090
chr14	102133853	102136596	2.33	6.13	-3.79	0.000139	0.00858	102085919	102139465	HSP90AA1
chr11	118487867	118490388	-0.25	4.7	-4.95	0.000139	0.00859	118495191	118505185	KMT2A
chr4	86632058	86637819	2.46	6.63	-4.17	0.000139	0.0086	86635252	86815149	PTPN13
chr19	39529547	39530278	-0.25	4.56	-4.81	0.00014	0.00863	39530987	39532852	EID2B
chr19	40685433	40686082	-0.25	4.53	-4.78	0.00014	0.00864	40680998	40684955	NUMBL
chr2	222592095	222592435	-0.25	4.52	-4.77	0.00014	0.00864	222566899	222656092	FARSB
chr17	67526002	67528555	1.88	5.92	-4.04	0.000141	0.00866	67532905	67632421	PITPNC1
chr1	227279659	227282914	2.39	6.64	-4.25	0.000141	0.00866	227199557	227254155	CDC42BPA
chr6	167939481	167940906	1.11	5.07	-3.96	0.000142	0.00873	167932602	167947909	AFDN
chr3	65673517	65676184	-0.25	4.75	-5.01	0.000142	0.00873	65354231	65622090	MAGI1
chr2	203512813	203515028	1.55	5.44	-3.89	0.000142	0.00874	203444850	203495353	RAPH1
chr22	47010523	47011251	-0.25	4.53	-4.78	0.000143	0.00875	46914092	46916042	TBC1D22A-AS1
chr1	150441274	150443319	0.69	4.89	-4.2	0.000143	0.00876	150487364	150507609	TARS2
chr4	150861997	150863238	0.46	4.75	-4.29	0.000144	0.00884	150264689	150871425	LRBA
chr17	30513486	30517767	2.07	6.15	-4.08	0.000145	0.00885	30519699	30522609	GOSR1
chr20	64256320	64257843	1.71	5.48	-3.77	0.000145	0.00885	64256586	64260059	PCMTD2
chr2	207078171	207078889	-0.25	4.66	-4.91	0.000145	0.00887	207109987	207110073	MIR2355
chr17	47133723	47134067	-0.25	4.52	-4.77	0.000146	0.00888	47120810	47137244	CDC27
chr7	30643527	30645670	2.73	6.47	-3.74	0.000146	0.00888	30631965	30634033	GARS1
chr12	101816480	101817929	0.72	4.87	-4.16	0.000146	0.00888	101795871	101830663	GNPTAB
chr9	87542081	87543323	1.09	5.38	-4.29	0.000146	0.00888	87553454	87554459	DAPK1-IT1
chr11	116942665	116943453	0.55	4.77	-4.22	0.000147	0.00893	116868792	116957044	SIK3
chr2	23830059	23830727	-0.25	4.53	-4.78	0.000147	0.00893	23751803	23832602	ATAD2B
chr18	26265545	26266802	1.09	5.12	-4.03	0.000147	0.00894	26226883	26391683	TAF4B
chr10	120853827	120860950	3.13	7.28	-4.14	0.000147	0.00894	120852616	120909520	WDR11
chr8	18986525	18989362	-0.25	4.63	-4.88	0.000148	0.00896	18527303	19013686	PSD3
chr15	64896874	64897752	1.27	5.22	-3.95	0.000148	0.00896	64911902	64931967	ANKDD1A
chr2	108736798	108740037	3.07	6.7	-3.64	0.000148	0.00896	108730817	108731898	RANBP2
chr13	100166054	100166923	-0.25	4.74	-4.99	0.000148	0.00896	100149201	100161625	PCCA
chr4	40985886	40987023	-0.25	4.6	-4.86	0.000148	0.00896	40815313	41014385	APBB2
chr1	83037384	83038413	-0.25	4.5	-4.75	0.000148	0.00896	82973929	82986208	LINC01361
chr8	63206903	63210678	1.4	5.39	-3.98	0.000149	0.00898	63187530	63189042	YTHDF3
chr4	182508162	182509851	1.09	5.35	-4.26	0.000149	0.009	182448999	182628875	TENM3
chr10	74272763	74273743	0.46	4.72	-4.26	0.00015	0.00903	74314733	74708549	ADK
chr1	59314085	59314958	-0.25	4.6	-4.85	0.00015	0.00903	59310087	59762728	FGGY
chr8	117967211	117968301	-0.25	4.89	-5.14	0.000151	0.00908	117822465	118110414	EXT1
chr10	110988777	110990778	-0.25	4.73	-4.99	0.000151	0.00908	110988926	110989013	MIR548E
chr12	19268688	19269478	-0.25	4.56	-4.81	0.000151	0.0091	19257474	19307560	PLEKHA5
chr12	3109854	3111078	-0.25	4.61	-4.86	0.000152	0.00915	3077428	3084210	TSPAN9
chr6	131908893	131909781	0.51	4.79	-4.29	0.000153	0.00917	131868037	131880287	ENPP1
chr1	116982031	116983273	0.15	4.91	-4.76	0.000153	0.00917	116967060	116974497	PTGFRN
chr5	149499968	149501549	1.26	5.25	-3.99	0.000153	0.00918	149499163	149513120	CSNK1A1
chr17	74445382	74447330	2.27	5.75	-3.47	0.000153	0.00918	74443085	74450580	GPRC5C
chr4	42047185	42049124	0.9	5.06	-4.16	0.000154	0.00919	42063034	42078851	SLC30A9
chr3	43333682	43334912	0.94	5.05	-4.11	0.000154	0.00919	43332166	43340681	SNRK
chr2	71396758	71397758	0.21	4.67	-4.47	0.000154	0.00919	71395719	71435058	ZNF638
chr5	180266466	180269132	0.13	6.15	-6.02	0.000154	0.00919	180253507	180264842	MAPK9
chr4	98277379	98278226	0.69	4.88	-4.19	0.000154	0.00919	98261518	98442334	RAP1GDS1
chr2	25254103	25255204	-0.25	4.54	-4.79	0.000154	0.00919	25234197	25252311	DNMT3A
chr6	167910651	167911556	-0.25	4.53	-4.78	0.000154	0.0092	167913541	167965029	AFDN
chrX	44995498	44995964	-0.25	4.54	-4.8	0.000154	0.0092	45059282	45063676	KDM6A
chr21	15021757	15023140	0.72	5.01	-4.29	0.000155	0.00921	14818843	15014430	LINC02246
chr6	37128509	37135807	3.14	7.98	-4.84	0.000155	0.00922	37170152	37175428	PIM1
chr15	77457166	77458205	-0.25	4.48	-4.73	0.000155	0.00922	77458217	77470946	HMG20A
chr1	225841743	225844794	2.49	6.18	-3.69	0.000156	0.00926	225846576	225847465	TMEM63A
chr18	12862800	12871108	2.93	7.38	-4.45	0.000156	0.00926	12859164	12864194	PTPN2
chr3	47079565	47085631	3.08	7.15	-4.07	0.000156	0.00928	47062160	47083946	SETD2
chr16	15094725	15095842	-0.25	4.74	-5	0.000157	0.00928	15094411	15109197	LOC100505915
chr2	68180804	68181919	0.69	4.91	-4.21	0.000157	0.00928	68173107	68174964	PNO1
chr1	53772927	53774699	1.6	5.56	-3.96	0.000157	0.00931	53506242	53738106	GLIS1
chr3	138075398	138076674	-0.25	4.51	-4.77	0.000158	0.00932	138080349	138081829	DZIP1L
chr9	5637136	5638192	0.46	4.73	-4.27	0.000158	0.00935	5629119	5776552	RIC1
chr1	224278394	224280486	0.69	5.02	-4.33	0.000158	0.00936	224231266	224269915	NVL
chr18	26083607	26084736	0.13	4.58	-4.44	0.000159	0.00939	26068260	26078386	SS18
chr8	102295040	102297846	1.4	5.39	-3.99	0.000159	0.0094	102287505	102293709	UBR5
chr14	77537969	77538868	-0.25	4.58	-4.83	0.00016	0.0094	77512341	77552192	SPTLC2
chr22	22505223	22506215	0.69	4.87	-4.18	0.00016	0.0094	22484858	22508733	ZNF280B
chr13	100451114	100453372	-0.25	4.87	-5.13	0.00016	0.0094	100464440	100480285	PCCA-AS1
chr3	65417711	65419174	1.88	5.89	-4.01	0.00016	0.00942	65379344	65401704	MAGI1
chr6	111498146	111504006	2.14	5.95	-3.8	0.000161	0.00946	111484652	111576590	TRAF3IP2-AS1
chr11	35681902	35683734	0.44	4.7	-4.26	0.000161	0.00948	35662775	35818007	TRIM44
chr17	59023101	59023733	-0.25	4.51	-4.77	0.000162	0.0095	58982638	59015617	TRIM37
chr1	220216137	220221878	2.28	6.48	-4.2	0.000162	0.0095	220202276	220211377	RAB3GAP2
chr19	11184789	11185748	-0.25	4.49	-4.74	0.000162	0.0095	11169676	11194511	KANK2
chr5	121974378	121975493	0.46	4.83	-4.37	0.000162	0.0095	121961975	122028633	SRFBP1
chr1	15500309	15501091	0.15	4.67	-4.52	0.000162	0.0095	15492798	15507052	CASP9
chr3	128181920	128182846	-0.25	4.62	-4.87	0.000163	0.00952	128064785	128153914	RUVBL1
chr3	31840002	31841564	1.62	5.38	-3.75	0.000164	0.00955	31732587	31830180	OSBPL10
chr2	64094129	64095769	0.15	4.74	-4.59	0.000164	0.00955	64143239	64229605	LOC100507006
chr9	92858928	92864850	3.03	6.91	-3.88	0.000164	0.00958	92846069	92878022	ZNF484
chr10	91844576	91846764	-0.25	4.59	-4.85	0.000164	0.00958	91798426	91865475	TNKS2
chr3	139351919	139352537	0.21	4.69	-4.48	0.000164	0.00958	139350870	139357046	MRPS22
chr12	69265013	69266511	-0.25	5.16	-5.41	0.000165	0.00961	69273157	69273218	MIR1279
chr17	2280918	2282107	1.58	5.61	-4.03	0.000165	0.00961	2059850	2266199	SMG6
chr9	95956442	95956978	-0.25	4.69	-4.94	0.000165	0.00961	95972902	96014563	ERCC6L2
chr2	188463310	188467316	2.7	7.18	-4.48	0.000166	0.00963	188522738	188584309	GULP1
chr2	70270210	70271065	-0.25	4.62	-4.87	0.000166	0.00964	70274758	70276787	PCYOX1
chr10	21225218	21225833	-0.25	4.48	-4.73	0.000166	0.00964	21174354	21174923	NEBL-AS1
chr17	59201431	59202389	-0.25	4.49	-4.74	0.000166	0.00964	59197566	59215226	SMG8
chr3	78883059	78884086	0.15	4.66	-4.51	0.000166	0.00964	78598811	79018544	ROBO1
chr19	36814054	36817139	2.07	6.12	-4.05	0.000167	0.00964	36801209	36828115	ZNF790-AS1
chr3	120774041	120777053	2.39	5.97	-3.57	0.000167	0.00964	120688597	120742993	RABL3
chr7	93706253	93708600	-0.25	4.68	-4.93	0.000167	0.00966	93716928	93717005	MIR4652
chr8	67244876	67246441	0.83	5.01	-4.18	0.000168	0.00968	67199929	67238754	ARFGEF1
chr4	92687116	92691867	0.69	5.17	-4.48	0.000168	0.00972	92822949	93112247	GRID2
chr3	136658973	136677745	2.96	7.63	-4.66	0.000169	0.00978	136499766	136604473	STAG1
chr9	82827495	82829550	2.02	6.06	-4.03	0.00017	0.00978	82979590	83063142	RASEF
chr10	94585423	94589301	2.36	6.65	-4.29	0.00017	0.0098	94590699	94613905	HELLS
chr7	8257785	8259067	1.4	5.41	-4	0.00017	0.00981	8113309	8262052	ICA1
chr6	105028382	105029396	0.9	4.96	-4.05	0.000171	0.00983	104957107	105083332	LIN28B
chr8	9622337	9624890	2.17	5.79	-3.62	0.000172	0.00987	9615290	9707008	TNKS
chr16	88723506	88724498	0.21	5.11	-4.91	0.000172	0.0099	88722523	88723934	PIEZO1
chr2	171047504	171049306	-0.25	4.52	-4.77	0.000172	0.0099	171045231	171055129	TLK1
chr11	74832543	74833516	0.44	4.73	-4.29	0.000173	0.0099	74848125	74852064	XRRA1
chr1	186363580	186366377	2.18	5.79	-3.61	0.000173	0.00991	186351423	186356538	TPR
chr13	93260461	93266960	-0.25	5.65	-5.91	0.000173	0.00993	93226807	94408020	GPC6
chr4	139358191	139360716	2.2	5.82	-3.62	0.000174	0.00993	139351535	139359857	NAA15
chr18	63333535	63333965	-0.25	4.5	-4.75	0.000174	0.00994	63331404	63336023	KDSR
chr2	190299705	190300872	0.9	4.99	-4.09	0.000174	0.00994	190244902	190290485	HIBCH
chr11	83280297	83281152	0.13	4.6	-4.46	0.000174	0.00994	83261730	83278830	CCDC90B
chr1	193061170	193061965	0.15	4.62	-4.47	0.000174	0.00994	193051792	193060080	UCHL5
chr5	171021784	171023155	2.36	5.73	-3.37	0.000174	0.00994	170968256	171029200	RANBP17
chr7	131373616	131376796	1.87	5.86	-3.99	0.000175	0.00996	131322716	131328312	MKLN1-AS
chr10	127383681	127384786	-0.25	4.5	-4.75	0.000176	0.01	127248068	127272196	DOCK1
chr2	36931643	36932589	-0.25	4.58	-4.83	0.000176	0.01	36869703	36902928	STRN
chr7	66704018	66704461	0.13	4.61	-4.48	0.000177	0.01	66682164	66809662	RABGEF1
chr5	180306232	180307475	1.26	5.74	-4.48	0.000177	0.01	180233594	180292099	MAPK9
chr1	68490283	68492694	1.54	5.69	-4.15	0.000177	0.0101	68476897	68494531	DEPDC1
chr8	39014953	39018030	-0.25	4.82	-5.07	0.000178	0.0101	39017036	39021713	ADAM9
chr1	151688501	151689641	0.44	4.73	-4.29	0.000178	0.0101	151675856	151694485	SNX27
chr1	235247540	235252838	3.16	7.2	-4.04	0.000179	0.0101	235180139	235234492	ARID4B
chr12	28208786	28209725	-0.25	4.47	-4.72	0.00018	0.0102	28191245	28306749	CCDC91
chr7	105779694	105781463	1.18	5.08	-3.89	0.000181	0.0102	105613733	105691637	ATXN7L1
chr9	78013025	78016692	1.77	5.75	-3.98	0.000181	0.0102	77797528	78030604	GNAQ
chr12	45281422	45283783	2.72	6.54	-3.82	0.000181	0.0102	45292683	45432351	ANO6
chr2	64099805	64102751	0.9	4.95	-4.05	0.000181	0.0102	64143239	64229605	LOC100507006
chr17	38359871	38361242	0.55	4.8	-4.25	0.000181	0.0102	38352943	38377738	SOCS7
chr7	134308040	134308905	0.69	4.8	-4.11	0.000182	0.0102	134299309	134316897	SLC35B4
chr2	135969727	135978129	2.59	6.94	-4.35	0.000182	0.0102	135943386	135980551	DARS1
chr7	16762953	16763799	0.55	4.72	-4.17	0.000183	0.0103	16753755	16784536	TSPAN13
chr13	112737112	112738371	-0.25	4.86	-5.11	0.000183	0.0103	112745449	112754693	ATP11A-AS1
chr4	84861766	84863381	-0.25	4.65	-4.91	0.000184	0.0103	84849673	84860563	WDFY3
chr8	67993387	67994838	0.9	4.97	-4.06	0.000184	0.0103	67952489	68111089	PREX2
chr1	31335573	31336832	-0.25	4.69	-4.94	0.000184	0.0103	31365713	31369590	FABP3
chr12	133008692	133009974	1.4	5.34	-3.94	0.000185	0.0104	133004404	133012127	ZNF26
chr3	58804393	58805616	0.7	5.02	-4.32	0.000186	0.0104	58824437	59017637	C3orf67-AS1
chrX	41126754	41128063	-0.25	4.64	-4.89	0.000186	0.0104	41167145	41168242	USP9X
chr4	7875229	7875462	-0.25	4.45	-4.71	0.000186	0.0104	7758714	7872313	AFAP1
chr1	10132858	10133694	-0.25	4.43	-4.68	0.000187	0.0104	10128339	10145599	UBE4B
chr2	73734015	73735992	2.02	6.03	-4	0.000187	0.0104	73729104	73737335	TPRKB
chr15	43068653	43069576	-0.25	4.75	-5	0.000187	0.0104	43043214	43059804	UBR1
chr3	133067515	133069176	-0.25	5.15	-5.4	0.000187	0.0104	133041786	133380157	TMEM108
chr6	30264650	30265279	0.44	4.68	-4.24	0.000188	0.0105	30259625	30261703	HLA-L
chr20	3502480	3503127	0.44	4.8	-4.36	0.000188	0.0105	3471108	3615947	ATRN
chr19	21294998	21297130	2.18	5.81	-3.63	0.000188	0.0105	21294396	21329336	ZNF708
chr16	21623750	21626228	1.44	5.47	-4.02	0.000188	0.0105	21617898	21625233	METTL9
chr9	86268173	86270389	2.25	5.89	-3.65	0.000189	0.0105	86220265	86259657	C9orf153
chr14	45109006	45110816	0.72	5.19	-4.47	0.000189	0.0105	45109732	45115596	PRPF39
chr5	55338818	55341448	-0.25	4.72	-4.97	0.000189	0.0105	55327530	55343372	MTREX
chr17	16064786	16067287	-0.25	4.77	-5.02	0.00019	0.0105	16061867	16065885	NCOR1
chr2	63558174	63559119	0.15	4.54	-4.39	0.00019	0.0105	63437457	63588266	WDPCP
chr3	88063680	88064425	-0.25	4.58	-4.83	0.00019	0.0105	88059274	88135498	ZNF654
chr12	112157049	112158246	0.72	4.91	-4.19	0.000191	0.0105	112163258	112163321	MIR6861
chr4	47879601	47880482	-0.25	4.43	-4.68	0.000191	0.0106	47847240	47878704	NFXL1
chr12	97496582	97498200	1.27	5.04	-3.77	0.000192	0.0106	97494654	97560994	RMST
chr13	21403809	21405127	0.21	4.56	-4.35	0.000192	0.0106	21376515	21390254	ZDHHC20
chr15	89269627	89270238	-0.25	4.42	-4.67	0.000193	0.0106	89263437	89316444	FANCI
chr11	11852400	11855336	1.66	5.63	-3.97	0.000193	0.0107	11842066	11959323	USP47
chr7	157201190	157201541	-0.25	4.43	-4.68	0.000193	0.0107	157207513	157217245	UBE3C
chr15	41061951	41067683	3.07	7.05	-3.99	0.000194	0.0107	40983798	41069659	INO80
chr14	27617373	27619265	-0.25	5.5	-5.76	0.000194	0.0107	27613319	27639534	LINC00645
chr2	43973519	43974283	0.69	4.84	-4.15	0.000194	0.0107	43948426	43963804	LRPPRC
chr7	7224307	7230093	2.93	6.84	-3.91	0.000194	0.0107	7234258	7248651	C1GALT1
chr10	63282677	63286036	1.88	5.88	-4	0.000194	0.0107	63215438	63269253	JMJD1C
chr3	33680546	33681943	1.54	5.48	-3.94	0.000195	0.0107	33682979	33688368	CLASP2
chr10	32289345	32291269	-0.25	4.64	-4.9	0.000195	0.0107	32271554	32272249	EPC1
chr12	25229740	25230616	0.9	4.95	-4.05	0.000196	0.0107	25205246	25250929	KRAS
chr1	200466078	200467316	-0.25	4.86	-5.11	0.000197	0.0108	200404940	200410056	ZNF281
chr3	179157631	179158968	-0.25	4.56	-4.81	0.000197	0.0108	179149527	179199179	PIK3CA
chr11	134103540	134104488	-0.25	4.43	-4.68	0.000197	0.0108	134126339	134144996	JAM3
chr18	55329081	55331910	-0.25	4.54	-4.79	0.000197	0.0108	55234606	55322345	TCF4
chr8	28923237	28924904	0.94	5.04	-4.1	0.000198	0.0108	28891316	29051898	HMBOX1
chr9	23708229	23709403	-0.25	4.89	-5.14	0.000199	0.0108	23701415	23735565	ELAVL2
chr6	156784776	156791379	2.33	6.2	-3.87	0.000199	0.0108	156779678	156779731	MIR4466
chr2	159475475	159479209	-0.25	5.08	-5.34	0.000199	0.0108	159398843	159453661	BAZ2B
chr10	63182404	63183255	-0.25	4.47	-4.72	0.000199	0.0108	63167221	63176555	JMJD1C
chr9	122240214	122242920	-0.25	4.41	-4.66	0.0002	0.0109	122241670	122247546	RBM18
chr17	28050915	28051787	0.9	5.06	-4.15	0.000201	0.0109	28043030	28196381	NLK
chr9	19375155	19380174	2.81	7.28	-4.47	0.000201	0.0109	19376255	19376839	RPS6
chr12	65190979	65193111	-0.25	5.09	-5.34	0.000201	0.0109	65169583	65248355	LEMD3
chr5	138903977	138904752	-0.25	4.41	-4.66	0.000202	0.0109	138904399	138930509	CTNNA1
chr19	4180559	4182225	1.81	5.57	-3.76	0.000203	0.011	4174141	4182279	SIRT6
chr9	23693643	23694321	-0.25	4.44	-4.69	0.000203	0.011	23671788	23672399	LOC101929563
chr6	100802114	100805546	-0.25	4.51	-4.76	0.000203	0.011	100848004	100881301	ASCC3
chr6	69754783	69757121	0.15	4.6	-4.45	0.000203	0.011	69675974	69749408	LMBRD1
chr7	39576237	39577955	1.85	5.61	-3.76	0.000203	0.011	39570254	39572572	YAE1
chr2	167421285	167425246	2.62	6.24	-3.63	0.000204	0.011	167248682	167259749	XIRP2
chr2	47820374	47821820	-0.25	4.59	-4.85	0.000204	0.011	47809230	47814298	FBXO11
chr19	36678684	36679359	-0.25	4.52	-4.77	0.000205	0.011	36682636	36687434	LINC01534
chr14	77729070	77730324	0.46	4.95	-4.49	0.000205	0.011	77730856	77737007	SNW1
chr9	120417888	120419288	1.58	5.51	-3.93	0.000205	0.011	120389199	120403662	CDK5RAP2
chr9	20722276	20724181	1.93	5.57	-3.64	0.000205	0.0111	20726286	20770112	FOCAD
chr6	111263959	111264456	0.15	4.56	-4.41	0.000206	0.0111	111259624	111278732	MFSD4B
chr15	24969086	24970610	-0.25	4.47	-4.73	0.000207	0.0111	24978583	24991753	SNHG14
chr19	12025114	12027486	1.98	5.93	-3.96	0.000207	0.0112	12016548	12018677	ZNF433
chr12	47658636	47660163	-0.25	4.41	-4.67	0.000208	0.0112	47663290	47664843	RPAP3
chr9	87428395	87428891	-0.25	4.49	-4.74	0.00021	0.0113	87497228	87708631	DAPK1
chr13	48983388	48990755	2.24	7.15	-4.92	0.00021	0.0113	48976673	49209607	FNDC3A
chr12	32847795	32848524	0.13	4.52	-4.38	0.00021	0.0113	32821467	32824405	PKP2
chr3	9113005	9113789	-0.25	4.43	-4.68	0.000211	0.0113	9006979	9124977	SRGAP3
chr5	98904245	98905087	0.9	5.04	-4.13	0.000211	0.0113	98881247	98888186	CHD1
chr9	113885474	113886197	-0.25	4.43	-4.68	0.000212	0.0114	113876382	114030882	ZNF618
chr3	185815382	185818745	-0.25	5.07	-5.32	0.000212	0.0114	185814055	185821103	IGF2BP2
chr20	23386369	23387178	-0.25	4.4	-4.65	0.000213	0.0114	23368871	23370421	GZF1
chr17	50984259	50985482	-0.25	4.4	-4.65	0.000213	0.0114	50976600	50982672	SPAG9
chr10	902065	903024	0.13	4.6	-4.46	0.000213	0.0114	864241	903515	LARP4B
chr5	142838	144375	1.4	5.36	-3.96	0.000213	0.0114	140566	157110	PLEKHG4B
chr5	41864100	41865119	0.83	5	-4.17	0.000213	0.0114	41869927	41872219	OXCT1-AS1
chr1	212310886	212312368	-0.25	4.48	-4.73	0.000214	0.0114	212301863	212342280	PPP2R5A
chr13	21415085	21421170	3.02	6.98	-3.96	0.000215	0.0114	21376519	21421107	ZDHHC20
chr2	32155597	32156463	-0.25	4.42	-4.67	0.000215	0.0114	32165841	32224112	SLC30A6
chr12	32856924	32857463	0.7	4.77	-4.07	0.000215	0.0114	32821467	32824405	PKP2
chr2	76597696	76598331	-0.25	4.41	-4.66	0.000216	0.0115	76985965	77009791	LRRTM4-AS1
chr8	28500012	28501801	0.9	4.95	-4.04	0.000216	0.0115	28505116	28505182	MIR4288
chr22	33521214	33526068	3.08	6.85	-3.77	0.000216	0.0115	33562913	33565019	LARGE1
chr2	167313115	167318160	1.98	5.94	-3.96	0.000217	0.0115	167248682	167259749	XIRP2
chrX	2264233	2266389	1.98	5.94	-3.97	0.000217	0.0115	2261394	2266937	DHRSX
chr1	149437395	149446090	1.77	5.68	-3.9	0.000217	0.0115	149475338	149556361	NBPF19
chr4	84910201	84911147	0.71	4.79	-4.08	0.000218	0.0115	84808866	84896941	WDFY3
chr7	130586311	130587208	-0.25	4.64	-4.89	0.000218	0.0115	130506524	130564511	COPG2
chr1	109590378	109591517	0.83	4.86	-4.03	0.000219	0.0115	109598893	109598967	MIR197
chr3	88071297	88072389	1.49	5.2	-3.71	0.000219	0.0115	88059274	88135498	ZNF654
chr16	2063934	2064886	0.15	4.75	-4.6	0.000219	0.0116	2064071	2065583	TSC2
chr12	96394085	96394695	-0.25	4.47	-4.72	0.00022	0.0116	96323966	96399364	CDK17
chr10	86910854	86911762	0.44	4.7	-4.26	0.000221	0.0116	86943871	86944571	MMRN2
chr4	173241981	173244418	0.44	4.88	-4.44	0.000221	0.0116	173268160	173268233	MIR548T
chr1	6881350	6881743	-0.25	4.44	-4.7	0.000222	0.0117	6874056	6887842	CAMTA1
chr17	80824629	80826894	1.82	5.74	-3.92	0.000223	0.0117	80801640	80805632	LOC101928855
chr2	54520795	54522222	0.72	4.82	-4.1	0.000223	0.0117	54515744	54528715	SPTBN1
chr15	78044505	78045044	-0.25	4.39	-4.64	0.000223	0.0117	78044997	78054001	TBC1D2B
chr6	142189430	142190081	-0.25	4.44	-4.69	0.000223	0.0117	142170346	142198781	VTA1
chr2	188497607	188498356	0.15	4.57	-4.42	0.000224	0.0117	188522738	188584309	GULP1
chr4	84629322	84632315	-0.25	4.55	-4.81	0.000224	0.0117	84583269	84619511	CDS1
chr7	8232315	8233614	0.13	4.55	-4.42	0.000224	0.0117	8113923	8235926	ICA1
chr2	65336905	65337606	-0.25	4.44	-4.7	0.000224	0.0117	65313703	65334773	SPRED2
chr2	239197999	239198672	-0.25	4.45	-4.7	0.000225	0.0117	239163833	239191056	HDAC4
chr15	65880836	65884290	2.36	6.47	-4.11	0.000225	0.0117	65870013	65887791	RAB11A
chr3	50282813	50284079	0.13	4.66	-4.53	0.000226	0.0118	50279087	50288114	LSMEM2
chr2	121656393	121657896	1.97	5.67	-3.7	0.000226	0.0118	121650151	121706442	NIFK-AS1
chr10	50569868	50570758	0.21	4.59	-4.39	0.000226	0.0118	50305600	50623956	SGMS1
chr14	60917417	60918150	-0.25	4.39	-4.64	0.000227	0.0118	60879714	60982585	MNAT1
chr9	127897762	127898368	-0.25	4.45	-4.7	0.000227	0.0118	127885321	127897981	ST6GALNAC6
chr4	112722526	112723522	1.29	5.25	-3.96	0.000227	0.0118	112655363	112657592	LARP7
chr6	26132577	26133342	1.29	5.16	-3.87	0.000227	0.0118	26123356	26123926	H2BC4
chr4	114628976	114631574	0.46	4.67	-4.21	0.000231	0.012	114622367	114676596	UGT8
chr1	179885770	179886092	0.13	4.54	-4.4	0.000231	0.012	179883985	179908625	TOR1AIP1
chr10	5706612	5709663	1.4	5.53	-4.13	0.000232	0.012	5709626	5714574	TASOR2
chr4	61732812	61735411	1.8	5.45	-3.66	0.000232	0.012	61587368	61677392	ADGRL3
chr1	178105739	178106913	0.46	4.64	-4.18	0.000233	0.012	178094141	178473422	RASAL2
chr16	22061312	22062085	0.21	4.66	-4.46	0.000233	0.0121	22092538	22110912	VWA3A
chr15	57041202	57043526	-0.25	4.51	-4.76	0.000234	0.0121	57063748	57092023	TCF12
chr6	149369893	149371974	1.82	5.79	-3.97	0.000235	0.0121	149397692	149409617	TAB2
chr2	43935774	43936127	0.13	4.63	-4.5	0.000235	0.0121	43948426	43963804	LRPPRC
chr19	32415984	32416591	-0.25	4.52	-4.78	0.000235	0.0121	32406189	32436495	DPY19L3
chr17	40631233	40636032	2.5	6.71	-4.21	0.000235	0.0121	40627744	40632962	SMARCE1
chr3	65558746	65561470	1.66	5.68	-4.02	0.000235	0.0121	65470283	65549500	MAGI1
chr17	54934666	54935991	1.78	5.42	-3.64	0.000236	0.0122	54936413	54937484	TOM1L1
chr12	4682205	4683016	-0.25	4.42	-4.67	0.000237	0.0122	4684980	4687233	NDUFA9
chr1	27540680	27541377	0.15	4.49	-4.34	0.000237	0.0122	27552773	27553545	AHDC1
chr16	67075734	67076322	-0.25	4.38	-4.63	0.000237	0.0122	67079560	67101045	CBFB
chr6	128350453	128352779	-0.25	4.48	-4.73	0.000238	0.0122	128184432	128322181	PTPRK
chr2	60775402	60776059	0.5	4.67	-4.18	0.000238	0.0122	60779554	60783193	PAPOLG
chr7	141287407	141288258	-0.25	4.42	-4.68	0.000238	0.0122	141074393	141212764	TMEM178B
chr2	119792702	119793415	-0.25	5.08	-5.33	0.000239	0.0122	119760275	119882579	PTPN4
chr9	97189901	97190701	-0.25	4.7	-4.95	0.000239	0.0122	97195351	97197687	ANKRD18CP
chr1	40285162	40286168	-0.25	4.55	-4.8	0.00024	0.0123	40290645	40292621	ZMPSTE24
chr8	47807279	47807946	-0.25	4.37	-4.62	0.00024	0.0123	47782414	47784139	PRKDC
chr3	179619333	179621153	-0.25	4.51	-4.76	0.000241	0.0123	179618227	179624100	NDUFB5
chr10	42824926	42830489	2.52	6.72	-4.2	0.000241	0.0123	42871521	42874060	LINC02623
chr6	104965262	104967071	2.11	5.66	-3.55	0.000242	0.0123	104957107	105083332	LIN28B
chr1	77631930	77634037	2	5.64	-3.64	0.000242	0.0123	77564506	77632876	ZZZ3
chr2	171688219	171691727	1.7	5.61	-3.9	0.000243	0.0124	171688303	171725650	DYNC1I2
chr2	42307271	42308125	-0.25	4.36	-4.61	0.000243	0.0124	42317474	42319998	EML4
chr22	27894244	27895605	-0.25	4.41	-4.66	0.000243	0.0124	27894161	27896702	PITPNB
chr12	124857754	124858504	-0.25	4.43	-4.68	0.000243	0.0124	124778499	124863783	SCARB1
chr14	103450526	103452243	1.12	4.95	-3.84	0.000244	0.0124	103465714	103503281	MARK3
chr10	20127950	20129608	-0.25	4.37	-4.62	0.000244	0.0124	20043320	20280357	PLXDC2
chr16	70734257	70735053	0.72	4.81	-4.09	0.000244	0.0124	70688043	70744580	VAC14
chr4	39878401	39879153	-0.25	4.54	-4.79	0.000245	0.0124	39862986	39874408	PDS5A
chr16	136138	136714	-0.25	4.54	-4.79	0.000245	0.0124	112660	138335	NPRL3
chr14	92118390	92119658	1.67	5.4	-3.73	0.000245	0.0124	92116126	92118726	NDUFB1
chr21	15749206	15751026	1.54	5.42	-3.89	0.000246	0.0125	15730025	15880069	USP25
chr10	91979318	91979883	-0.25	4.44	-4.7	0.000247	0.0125	91980520	91982415	BTAF1
chr15	40702160	40702916	0.15	4.52	-4.37	0.000247	0.0125	40701131	40718827	RAD51
chr11	44155336	44158206	1.44	5.37	-3.92	0.000248	0.0125	44130043	44198120	EXT2
chr12	67307237	67309417	-0.25	4.41	-4.66	0.000248	0.0126	67298972	67314608	CAND1
chr1	179147663	179151439	3.35	6.57	-3.22	0.000249	0.0126	179104048	179143089	ABL2
chr22	31504948	31506872	2	5.59	-3.59	0.000249	0.0126	31508255	31613453	SFI1
chr9	106892049	106892391	-0.25	4.48	-4.73	0.00025	0.0126	106863166	107013634	ZNF462
chr15	50468069	50468784	-0.25	4.37	-4.63	0.000251	0.0126	50458503	50471735	USP8
chr14	53109239	53111784	0.21	5.48	-5.28	0.000251	0.0126	53091911	53093851	DDHD1
chr19	36544936	36545544	1.03	4.94	-3.92	0.000252	0.0127	36510687	36528271	ZNF260
chr1	90942071	90948834	2.69	7.06	-4.37	0.000252	0.0127	90937883	90940120	ZNF644
chr5	75470121	75475101	1.74	6.23	-4.49	0.000252	0.0127	75371121	75506004	CERT1
chr2	25622249	25623191	-0.25	4.36	-4.61	0.000252	0.0127	25594889	25607293	DTNB
chr6	33205664	33206934	0.94	4.94	-4	0.000253	0.0127	33207835	33207944	MIR219A1
chr5	94667261	94668683	0.55	4.83	-4.28	0.000253	0.0127	94678399	94695871	SLF1
chr12	78874273	78875541	-0.25	4.55	-4.8	0.000253	0.0127	78868772	79217517	SYT1
chr11	3696439	3697810	1.46	5.2	-3.74	0.000253	0.0127	3695471	3697260	NUP98
chr21	26044174	26048428	2.65	6.95	-4.3	0.000254	0.0127	25997188	26051018	APP
chr14	63921721	63922228	0.21	5.08	-4.87	0.000255	0.0128	63909098	64225564	SYNE2
chr18	31915354	31916635	1.09	5.11	-4.02	0.000255	0.0128	31913502	31939462	TRAPPC8
chrX	136874208	136874838	0.21	4.52	-4.32	0.000256	0.0128	136869192	136873982	RBMX
chr1	149960990	149961674	0.94	5.04	-4.1	0.000256	0.0128	149960927	149971261	OTUD7B
chr10	101391512	101393499	2.35	5.95	-3.6	0.000256	0.0128	101354534	101526083	BTRC
chr4	98883048	98887867	3.25	7.11	-3.87	0.000256	0.0128	98881010	98890898	EIF4E
chr4	26408070	26410321	-0.25	4.65	-4.9	0.000257	0.0128	26420570	26424994	RBPJ
chr1	201993875	201995067	0.15	4.63	-4.48	0.000258	0.0129	201996172	202001722	RNPEP
chr14	93297358	93298553	-0.25	4.52	-4.77	0.000259	0.0129	93287672	93296158	BTBD7
chr2	32128748	32129522	-0.25	4.35	-4.6	0.00026	0.0129	32126637	32130604	SPAST
chr17	35740098	35740606	0.13	4.52	-4.39	0.000261	0.013	35735337	35737072	RASL10B
chr19	48499991	48501334	-0.25	4.7	-4.96	0.000261	0.013	48485271	48501837	LMTK3
chr1	229657270	229658819	0.91	4.96	-4.05	0.000261	0.013	229650847	229659126	URB2
chr18	68705097	68706322	-0.25	4.36	-4.61	0.000261	0.013	68697376	68700423	TMX3
chr4	120898326	120900118	1.8	5.64	-3.84	0.000262	0.013	120695111	120922681	PRDM5
chr12	1760805	1762832	-0.25	4.39	-4.64	0.000262	0.013	1760729	1777915	ADIPOR2
chr5	72832494	72834194	0.21	4.75	-4.55	0.000263	0.013	72848170	72861915	TNPO1
chr19	15337414	15338519	1.64	5.26	-3.61	0.000263	0.013	15252992	15332545	BRD4
chr13	100120616	100121948	0.15	4.63	-4.48	0.000264	0.0131	100102899	100530437	PCCA
chr11	76117145	76117813	-0.25	4.37	-4.62	0.000264	0.0131	76115900	76141660	UVRAG
chr22	40766877	40768512	-0.25	4.41	-4.66	0.000266	0.0131	40770088	40780194	SLC25A17
chr5	133956165	133958442	-0.25	4.46	-4.71	0.000266	0.0132	133955510	133968625	C5orf15
chr2	160328805	160330244	0.46	4.95	-4.49	0.000268	0.0132	160302504	160318203	RBMS1
chr3	126955176	126956198	1.13	5.07	-3.95	0.000268	0.0132	126957010	126960406	CHCHD6
chr12	107050129	107050938	-0.25	4.41	-4.66	0.000269	0.0132	106991367	107050359	CRY1
chr1	196526463	196527180	1.54	5.4	-3.87	0.000269	0.0133	196582413	196582481	MIR4735
chr4	92528106	92529793	0.9	5.06	-4.15	0.00027	0.0133	92304657	93772498	GRID2
chr11	108162484	108165663	2.66	6.37	-3.71	0.000271	0.0133	108161184	108162165	NPAT
chr1	90919131	90923542	-0.25	4.9	-5.15	0.000271	0.0133	90916791	90918391	ZNF644
chr1	224420409	224426249	3.01	7.52	-4.5	0.000271	0.0133	224419549	224433838	WDR26
chr4	123087194	123088577	1.4	5.39	-3.98	0.000272	0.0133	122923101	123102293	SPATA5
chr3	121715491	121718025	0.94	5.17	-4.23	0.000273	0.0134	121697027	121729950	GOLGB1
chr17	42263166	42263925	-0.25	4.47	-4.72	0.000274	0.0134	42199168	42276406	STAT5B
chr8	94690792	94691395	-0.25	4.37	-4.63	0.000274	0.0134	94665157	94668365	ESRP1
chr16	29553608	29554745	0.44	4.67	-4.23	0.000274	0.0134	29527568	29594966	SMG1P2
chr8	119806389	119810138	2.2	6.15	-3.95	0.000274	0.0134	119788354	119797830	TAF2
chr2	32074826	32075535	-0.25	4.51	-4.76	0.000274	0.0134	32066002	32154720	SPAST
chr2	108756553	108759530	2.94	6.61	-3.66	0.000274	0.0134	108751551	108753097	RANBP2
chr11	59639611	59643306	2.41	6.15	-3.74	0.000274	0.0134	59642674	59647886	PATL1
chr3	138661458	138662564	0.21	4.52	-4.31	0.000275	0.0134	138657283	138663933	PIK3CB
chr5	94624058	94628485	0.69	5.47	-4.78	0.000275	0.0134	94628882	94665926	SLF1
chr12	62469112	62469315	0.15	4.47	-4.32	0.000275	0.0134	62467062	62493936	MON2
chr19	38553581	38554170	-0.25	4.55	-4.81	0.000275	0.0134	38566927	38572244	RYR1
chr5	88250188	88252265	-0.25	5.36	-5.61	0.000276	0.0134	88228441	88251037	TMEM161B
chr10	69134893	69138625	2.39	5.9	-3.52	0.000276	0.0134	69132898	69171359	VPS26A
chr20	2848312	2849040	0.46	4.65	-4.19	0.000276	0.0134	2838232	2841190	PCED1A
chr1	3863894	3864558	1.09	4.99	-3.9	0.000277	0.0135	3867663	3872545	DFFB
chr6	56565418	56566213	1.26	5.07	-3.81	0.000278	0.0135	56554746	56560704	DST
chr3	49171859	49172826	0.15	4.9	-4.75	0.00028	0.0136	49172713	49174966	KLHDC8B
chr20	18539575	18540247	0.46	4.6	-4.14	0.00028	0.0136	18542368	18560833	SEC23B
chr1	246619102	246621509	2.15	5.82	-3.67	0.000281	0.0136	246566514	246633957	CNST
chr8	35413356	35414361	1.09	5.04	-3.95	0.000281	0.0136	35544392	35794662	UNC5D
chr4	78315782	78317391	1.09	5.04	-3.94	0.000282	0.0136	78255246	78338037	FRAS1
chr17	1482899	1484430	1.7	5.64	-3.94	0.000282	0.0136	1482533	1484657	MYO1C
chr3	50801151	50802561	0.44	4.69	-4.25	0.000282	0.0136	50675080	50675163	MIR4787
chr15	34430426	34431155	0.69	4.83	-4.13	0.000282	0.0137	34406677	34428925	GOLGA8A
chr15	56989328	56994876	3.12	6.92	-3.8	0.000283	0.0137	57063748	57092023	TCF12
chr3	54671376	54672919	1.99	5.89	-3.9	0.000283	0.0137	54632122	54639857	ESRG
chr11	43386248	43390595	2.65	6.85	-4.2	0.000283	0.0137	43396136	43446544	TTC17
chr2	39341309	39342500	-0.25	4.4	-4.65	0.000284	0.0137	39293243	39325933	MAP4K3
chr7	116243595	116245143	2	5.61	-3.6	0.000284	0.0137	116250435	116252738	TES
chr20	2925145	2926039	0.46	4.7	-4.24	0.000284	0.0137	2923207	3038668	PTPRA
chr1	61781101	61787682	2.65	6.85	-4.21	0.000285	0.0137	61805510	62163504	PATJ
chr5	129469780	129473344	-0.25	5	-5.25	0.000285	0.0137	129461676	129528543	ADAMTS19
chr6	131820376	131821819	1.9	5.76	-3.86	0.000286	0.0137	131808123	131850081	ENPP1
chr3	15030273	15033164	2.78	6.34	-3.56	0.000286	0.0137	15032427	15053600	NR2C2
chr2	180994394	180995306	-0.25	4.64	-4.9	0.000286	0.0138	180984006	181062920	UBE2E3
chr1	213112091	213117764	-0.25	4.4	-4.66	0.000287	0.0138	213129527	213176704	RPS6KC1
chrUn_GL000195v1	65478	68789	-0.25	4.88	-5.13	0.000288	0.0138	42939	49164	LOC389831
chr1	212793963	212794765	0.72	4.72	-4	0.000289	0.0138	212794683	212804651	TATDN3
chr3	44572493	44574309	1.44	5.29	-3.85	0.000289	0.0139	44578223	44594311	ZNF660
chr5	172225928	172226817	1.13	5.04	-3.91	0.000289	0.0139	172194172	172203454	EFCAB9
chr10	91826143	91828446	-0.25	4.41	-4.66	0.00029	0.0139	91798426	91865475	TNKS2
chr6	135004125	135005085	-0.25	4.33	-4.58	0.00029	0.0139	134982293	134987745	HBS1L
chr19	19178238	19178728	-0.25	4.37	-4.62	0.000291	0.0139	19146868	19182347	BORCS8-MEF2B
chr8	47911457	47915074	2.16	6.03	-3.86	0.000292	0.0139	47926833	47929169	PRKDC
chr12	123659089	123660163	0.69	4.73	-4.04	0.000292	0.0139	123659363	123660628	GTF2H3
chr10	72181152	72182790	1.4	5.33	-3.93	0.000292	0.0139	72096520	72176854	ASCC1
chr10	19912871	19913685	-0.25	4.34	-4.59	0.000293	0.014	19816432	20289856	PLXDC2
chr11	76531372	76532233	-0.25	4.33	-4.58	0.000294	0.014	76526479	76544868	EMSY
chr2	159764585	159766039	-0.25	4.39	-4.65	0.000294	0.014	159759292	159767850	MARCHF7
chr2	105068578	105069469	-0.25	4.5	-4.75	0.000294	0.014	105089018	105097288	MRPS9
chr7	6231104	6232923	2.54	6.09	-3.54	0.000295	0.014	6161779	6272624	CYTH3
chr3	140976088	140977164	-0.25	4.53	-4.78	0.000296	0.0141	140973666	140976463	SLC25A36
chr4	92252081	92254626	-0.25	4.49	-4.74	0.000297	0.0141	92268767	92277075	LNCPRESS2
chr1	50754384	50755926	2.33	5.83	-3.49	0.000298	0.0141	50441276	50706051	FAF1
chr7	123543252	123544301	-0.25	4.38	-4.64	0.000299	0.0142	123541837	123545825	NDUFA5
chr2	11627389	11627788	-0.25	4.34	-4.59	0.000299	0.0142	11612343	11618300	GREB1
chr10	30319867	30325875	3.43	7.33	-3.9	0.0003	0.0142	30326564	30348977	MTPAP
chr3	107544608	107544922	-0.25	4.38	-4.63	0.000303	0.0143	107525402	107773066	BBX
chr14	50318981	50320969	0.13	5.59	-5.46	0.000303	0.0143	50319234	50335558	DMAC2L
chr12	133100593	133102742	2.63	6.17	-3.55	0.000304	0.0143	133081585	133105713	ZNF140
chr1	180484429	180486107	0.44	4.62	-4.18	0.000305	0.0144	180288230	180502577	ACBD6
chr5	60642285	60643401	-0.25	4.43	-4.69	0.000306	0.0145	60645516	60648147	DEPDC1B
chr18	50927428	50928209	-0.25	4.56	-4.82	0.000307	0.0145	50939117	50947838	ME2
chr1	81904425	81907317	-0.25	4.92	-5.17	0.000308	0.0145	81942969	81991368	ADGRL2
chr2	200420535	200421543	1.69	5.33	-3.64	0.000308	0.0145	200440649	200461337	SPATS2L
chr3	126738616	126739800	0.46	4.62	-4.16	0.000308	0.0145	126730564	126960391	CHCHD6
chr6	70459771	70462251	1.09	4.99	-3.9	0.000309	0.0145	70482133	70504960	FAM135A
chr12	121770971	121772090	-0.25	4.78	-5.03	0.000309	0.0145	121752129	121776158	TMEM120B
chr11	100832279	100834332	-0.25	4.58	-4.83	0.000309	0.0145	100839404	100859629	ARHGAP42
chr3	107626385	107627188	-0.25	4.31	-4.56	0.00031	0.0146	107645836	107728806	BBX
chr3	188227508	188229194	1.4	5.22	-3.81	0.000311	0.0146	188225405	188890671	LPP
chr5	50747795	50749564	-0.25	4.42	-4.67	0.000312	0.0146	50667893	50842342	PARP8
chr6	35883917	35885487	1.4	5.22	-3.81	0.000312	0.0146	35874240	35895719	SRPK1
chr2	17568280	17568732	-0.25	4.34	-4.59	0.000312	0.0146	17541160	17657018	VSNL1
chr4	93103814	93105664	-0.25	4.52	-4.77	0.000313	0.0147	93084986	93774553	GRID2
chr6	128513364	128514677	-0.25	4.73	-4.98	0.000314	0.0147	127969896	128520358	PTPRK
chr1	61709627	61710372	-0.25	4.3	-4.55	0.000314	0.0147	61683272	61709418	TM2D1
chr8	38102907	38104931	2.26	5.72	-3.46	0.000314	0.0147	38105493	38140080	ASH2L
chr12	111104619	111105766	-0.25	4.38	-4.63	0.000315	0.0147	111099446	111295346	CUX2
chr6	13676261	13683332	-0.25	6.14	-6.39	0.000315	0.0147	13621498	13711835	RANBP9
chr1	39480196	39482376	1.88	5.81	-3.93	0.000316	0.0147	39491636	39529869	BMP8A
chr1	169117426	169118378	1.53	5.23	-3.7	0.000316	0.0147	169107907	169127399	ATP1B1
chr8	39036630	39040839	2.39	6.39	-4.01	0.000316	0.0148	39018615	39018683	SNORD38D
chr12	62301369	62302572	-0.25	4.32	-4.57	0.000316	0.0148	62305595	62325933	USP15
chr3	31585189	31588738	-0.25	4.53	-4.78	0.000317	0.0148	31596806	31620296	STT3B
chr4	39772750	39775135	1.49	5.2	-3.71	0.000318	0.0148	39837012	39848561	PDS5A
chr12	50473997	50474661	0.44	4.59	-4.15	0.000318	0.0148	50504985	50680282	DIP2B
chr16	87380350	87380782	-0.25	4.34	-4.6	0.000319	0.0148	87343686	87383748	FBXO31
chr1	114421331	114422541	-0.25	4.92	-5.17	0.00032	0.0149	114404326	114406967	TRIM33
chr13	100122305	100123916	1.27	5.15	-3.88	0.00032	0.0149	100102899	100530437	PCCA
chr7	140817682	140818532	-0.25	4.47	-4.72	0.00032	0.0149	140725145	140824398	BRAF
chr3	32790594	32791729	-0.25	4.38	-4.63	0.00032	0.0149	32769665	32773512	CNOT10
chr17	49330491	49331015	0.13	4.53	-4.39	0.000321	0.0149	49361150	49367596	LOC102724596
chr6	38054250	38055993	0.46	5.21	-4.75	0.000321	0.0149	38061611	38062660	ZFAND3
chr17	43100932	43101657	0.44	4.66	-4.22	0.000321	0.0149	43094170	43104891	BRCA1
chr2	241365946	241369199	1.54	5.38	-3.84	0.000321	0.0149	241372560	241395644	FARP2
chr15	34097688	34101619	2.66	6.31	-3.65	0.000321	0.0149	34084330	34101807	EMC7
chr3	138951111	138953283	1.54	5.61	-4.07	0.000322	0.0149	138947234	138950879	FOXL2NB
chr2	61306256	61308089	1.4	5.21	-3.81	0.000323	0.0149	61214600	61301032	USP34
chr18	55577545	55578232	-0.25	4.37	-4.62	0.000324	0.015	55269914	55585481	TCF4
chr2	207154616	207159452	3.2	6.94	-3.74	0.000324	0.015	207081016	207165571	KLF7
chr1	10764254	10765061	-0.25	4.88	-5.13	0.000324	0.015	10636604	10796646	CASZ1
chr1	178307345	178307912	-0.25	4.31	-4.56	0.000325	0.015	178341471	178484147	RASAL2
chr1	220012506	220013064	-0.25	4.39	-4.65	0.000326	0.015	219997176	220007365	EPRS1
chr12	51703442	51704880	1.58	5.42	-3.84	0.000328	0.0151	51686423	51745948	SCN8A
chr2	17555479	17556700	0.69	4.74	-4.05	0.000328	0.0151	17541160	17657018	VSNL1
chr17	67892182	67892949	0.15	4.48	-4.33	0.000331	0.0152	67893221	67894078	BPTF
chr9	136040073	136041124	0.69	4.78	-4.09	0.000331	0.0152	136006537	136050580	NACC2
chr2	171031935	171035868	2.46	6.48	-4.02	0.000332	0.0153	171045231	171055129	TLK1
chr8	8863337	8867069	2.39	6.38	-3.99	0.000332	0.0153	8785759	8860031	MFHAS1
chr5	55471311	55472549	-0.25	4.52	-4.77	0.000334	0.0153	55441880	55468290	PLPP1
chr1	164762524	164764189	-0.25	4.3	-4.55	0.000336	0.0154	164772912	164807571	PBX1
chr14	31172313	31172601	-0.25	4.74	-5	0.000337	0.0154	31172954	31174974	HECTD1
chr16	85576413	85577353	1.44	5.4	-3.96	0.000338	0.0155	85555967	85654346	GSE1
chr1	112823555	112824039	-0.25	4.43	-4.68	0.000338	0.0155	112820178	112826268	LINC01356
chr12	95267540	95269908	2.18	5.46	-3.28	0.000339	0.0155	95269824	95282531	VEZT
chr1	169477079	169480150	2.02	5.88	-3.86	0.00034	0.0155	169463929	169485931	SLC19A2
chr3	154298594	154301118	0.71	4.7	-3.99	0.00034	0.0155	154284653	154295327	DHX36
chr12	49666639	49668611	2.1	6.03	-3.93	0.00034	0.0155	49661735	49668554	FMNL3
chr11	66537218	66537974	0.15	4.46	-4.32	0.00034	0.0155	66542484	66546006	ZDHHC24
chr14	48215250	48216077	-0.25	4.51	-4.77	0.00034	0.0155	47764954	47795302	LINC00648
chr10	73129677	73130899	1.09	5.26	-4.17	0.000341	0.0156	73126080	73126207	SNORA11F
chr4	56944318	56944931	-0.25	4.3	-4.55	0.000341	0.0156	56963350	56977606	NOA1
chr3	155690665	155691439	-0.25	4.36	-4.62	0.000341	0.0156	155479882	155704208	PLCH1
chr14	102806181	102807841	1.69	5.44	-3.75	0.000342	0.0156	102830354	102906255	TRAF3
chr7	23685909	23689971	2.59	6.7	-4.12	0.000342	0.0156	23680199	23702650	FAM221A
chr20	33365768	33366173	0.13	4.44	-4.3	0.000344	0.0157	33358841	33373359	CDK5RAP1
chr12	76449476	76450220	0.13	4.43	-4.3	0.000344	0.0157	76369718	76423266	OSBPL8
chr7	617292	618016	-0.25	4.4	-4.65	0.000345	0.0157	603185	608482	LOC101926963
chr7	112462049	112466535	2.2	6.07	-3.87	0.000345	0.0157	112461332	112472244	IFRD1
chr2	178447538	178450287	2.74	6.29	-3.55	0.000348	0.0158	178443289	178450484	PRKRA
chr10	74081710	74085466	2.55	6.65	-4.1	0.00035	0.0159	74104928	74108975	VCL
chr13	79524904	79526210	-0.25	4.6	-4.85	0.00035	0.0159	79518992	79520975	NDFIP2
chrY	13430255	13432769	2.4	5.92	-3.52	0.00035	0.0159	13393152	13479504	UTY
chr4	76122199	76123886	-0.25	4.33	-4.58	0.00035	0.0159	76115438	76118437	NUP54
chr1	180751643	180754011	-0.25	4.27	-4.52	0.000351	0.0159	180836652	180874055	XPR1
chr4	76176536	76177406	-0.25	4.94	-5.19	0.000351	0.0159	76173552	76177133	SCARB2
chr12	22652159	22654279	-0.25	4.3	-4.55	0.000351	0.0159	22646019	22685712	ETNK1
chr2	223899318	223900159	0.15	4.43	-4.28	0.000352	0.0159	223894235	223899276	WDFY1
chr4	25386322	25386858	0.46	4.58	-4.12	0.000352	0.0159	25393861	25395420	ANAPC4
chr22	19855290	19856524	1.29	5.11	-3.82	0.000352	0.0159	19788418	19854939	GNB1L
chr2	43838307	43838710	-0.25	4.37	-4.62	0.000353	0.0159	43812560	43838750	ABCG5
chr21	29336454	29340875	2.39	6.33	-3.94	0.000353	0.0159	29327276	29630751	GRIK1-AS2
chr2	11306742	11313281	2.96	7.3	-4.33	0.000353	0.0159	11221327	11287737	ROCK2
chr9	87417460	87422605	3.58	7.45	-3.88	0.000354	0.016	87497228	87708631	DAPK1
chr9	2031717	2034420	2.26	5.78	-3.52	0.000356	0.016	2032520	2039857	SMARCA2
chr2	68143999	68145278	0.44	4.57	-4.13	0.000356	0.016	68131760	68138785	WDR92
chr7	157267061	157268239	0.72	4.77	-4.05	0.000356	0.016	157256687	157267676	UBE3C
chr9	23818030	23818747	0.9	4.86	-3.95	0.000358	0.0161	23690104	23821275	ELAVL2
chr17	80111877	80112592	1.54	5.22	-3.67	0.000358	0.0161	80112384	80113271	GAA
chr21	31410922	31412585	-0.25	4.54	-4.79	0.000359	0.0161	31266296	31344279	TIAM1
chr16	84655179	84656083	1.13	5.2	-4.08	0.00036	0.0161	84657903	84662309	KLHL36
chr21	5144791	5147161	0.13	4.45	-4.31	0.00036	0.0161	5143222	5145445	LOC102724159
chr2	223820800	223821750	0.9	4.83	-3.92	0.00036	0.0161	223765177	223837484	AP1S3
chr1	27288769	27289686	-0.25	4.33	-4.59	0.000361	0.0161	27287709	27308619	WDTC1
chr11	111742130	111747653	3.17	6.95	-3.78	0.000362	0.0162	111741548	111747994	PPP2R1B
chr15	44516770	44519026	0.9	4.8	-3.9	0.000363	0.0162	44519224	44524436	CTDSPL2
chr12	12555151	12556031	-0.25	4.31	-4.56	0.000363	0.0162	12521327	12560886	DUSP16
chr18	2574772	2575824	-0.25	4.51	-4.76	0.000364	0.0162	2577849	2582879	NDC80
chr19	4648719	4650225	1.66	5.57	-3.91	0.000364	0.0163	4640017	4655568	TNFAIP8L1
chr15	85593642	85596894	1.4	5.21	-3.81	0.000365	0.0163	85582910	85645917	AKAP13
chr5	39045676	39046966	0.69	5.26	-4.57	0.000365	0.0163	38940015	39074389	RICTOR
chr10	112451124	112452559	2.18	5.65	-3.47	0.000365	0.0163	112447359	112527405	VTI1A
chr16	184347	186027	2.24	5.98	-3.74	0.000365	0.0163	180459	181179	HBQ1
chr19	53814355	53819324	2.76	6.96	-4.2	0.000366	0.0163	53793742	53824317	NLRP12
chr1	178432693	178434441	0.46	4.59	-4.13	0.000366	0.0163	178452437	178473522	RASAL2
chr22	40478422	40479070	0.44	4.57	-4.13	0.000366	0.0163	40410289	40463440	MRTFA
chr2	187758463	187760097	2.11	5.97	-3.85	0.000366	0.0163	187496881	187565760	TFPI
chr9	77898562	77899440	0.13	4.48	-4.34	0.000367	0.0163	77797528	78030604	GNAQ
chr1	100224939	100226896	2.33	5.87	-3.54	0.000367	0.0163	100210543	100249820	DBT
chr8	35323479	35324122	-0.25	4.29	-4.54	0.000368	0.0163	35235775	35791208	UNC5D
chr1	164572033	164572339	-0.25	4.26	-4.52	0.000368	0.0163	164576784	164847101	PBX1
chr20	17596601	17599825	2.6	6.13	-3.53	0.000368	0.0163	17613678	17619817	RRBP1
chr3	111084364	111084994	-0.25	4.27	-4.52	0.00037	0.0164	111074204	111118703	NECTIN3
chr19	13839877	13842555	2.59	6.63	-4.05	0.000371	0.0164	13823880	13842928	LOC284454
chr7	135964444	135968421	2.31	6.23	-3.92	0.000371	0.0164	135929459	135977353	MTPN
chr2	188437275	188438321	1.26	5.1	-3.85	0.000372	0.0164	188139637	188384313	LINC01090
chr11	92451591	92453176	-0.25	4.37	-4.62	0.000372	0.0164	92355186	92524949	FAT3
chr5	175926590	175931497	0.46	4.86	-4.4	0.000372	0.0164	175926559	175961117	THOC3
chr9	100136712	100137403	-0.25	4.29	-4.54	0.000372	0.0164	100104539	100240126	INVS
chr3	158677385	158678108	1.4	5.2	-3.8	0.000373	0.0165	158681988	158690586	GFM1
chr14	60270835	60276946	-0.25	5.56	-5.81	0.000373	0.0165	60256762	60283147	PPM1A
chr1	88742838	88743557	0.69	4.65	-3.96	0.000373	0.0165	88771455	88804894	PKN2
chr1	35023802	35025288	0.44	4.81	-4.37	0.000374	0.0165	35014866	35031632	ZMYM6
chr12	12117541	12119664	0.44	4.76	-4.32	0.000374	0.0165	12111952	12112036	MIR1244-1
chr2	1134179	1135143	0.15	4.52	-4.37	0.000375	0.0165	1163247	1220057	SNTG2
chr7	24389576	24391079	-0.25	4.98	-5.23	0.000376	0.0166	24285107	24291824	NPY
chr2	36948288	36948694	-0.25	4.34	-4.6	0.000377	0.0166	36849406	36966471	STRN
chr14	34797401	34798364	0.15	4.77	-4.62	0.000378	0.0166	34783896	34786601	BAZ1A
chr15	65358223	65359226	-0.25	4.27	-4.53	0.000378	0.0166	65329579	65356372	IGDCC3
chr1	244441091	244445185	2.65	6.72	-4.08	0.000378	0.0166	244408494	244451909	ADSS2
chr22	30382588	30383394	-0.25	4.4	-4.66	0.000379	0.0166	30379590	30384834	RNF215
chr4	89050183	89051219	0.46	4.63	-4.17	0.000379	0.0166	88855367	89057150	FAM13A
chr1	222819559	222822155	2.11	5.99	-3.88	0.000379	0.0166	222815129	222837380	DISP1
chr15	89877106	89878275	-0.25	4.38	-4.63	0.00038	0.0166	89883931	89884030	MIR5009
chr1	158003895	158006371	2.17	5.78	-3.61	0.00038	0.0166	157993645	158100262	KIRREL1
chr21	33815171	33816239	-0.25	4.49	-4.75	0.000382	0.0167	33818026	33829029	ITSN1
chr5	80145900	80146786	0.72	4.73	-4.01	0.000382	0.0167	80156994	80167180	SERINC5
chr4	123400507	123405700	2.92	7.19	-4.27	0.000382	0.0167	123399968	123401696	SPRY1
chr3	176347437	176348339	1.4	5.37	-3.96	0.000383	0.0167	176515103	176515151	MIR7977
chr1	20772118	20773133	-0.25	4.25	-4.5	0.000383	0.0167	20742682	20775005	HP1BP3
chr1	224390971	224399091	3.41	7.2	-3.79	0.000383	0.0167	224398227	224398311	MIR4742
chr22	25676984	25678455	0.46	4.52	-4.06	0.000383	0.0167	25742144	26027766	MYO18B
chr3	66251030	66252204	0.15	4.42	-4.27	0.000384	0.0167	66243203	66378927	SLC25A26
chr4	48245785	48246435	-0.25	4.39	-4.65	0.000384	0.0167	48136804	48228659	TEC
chr5	37303984	37307358	2.31	6.23	-3.92	0.000384	0.0168	37301014	37303416	NUP155
chr3	176303861	176316030	3.84	8	-4.15	0.000385	0.0168	176515103	176515151	MIR7977
chr11	33306740	33307718	1.32	5.11	-3.79	0.000386	0.0168	33328600	33338842	HIPK3
chr12	95650171	95650872	-0.25	4.36	-4.61	0.000386	0.0168	95649255	95673999	PGAM1P5
chr2	210162771	210163557	-0.25	4.37	-4.62	0.000387	0.0168	210154183	210170594	KANSL1L
chr22	25286121	25286714	-0.25	4.44	-4.7	0.000387	0.0168	25282613	25320086	IGLL3P
chr8	140704946	140705914	0.13	4.46	-4.33	0.000387	0.0168	140700770	140706168	PTK2
chr19	37771604	37773022	1.28	5	-3.72	0.000388	0.0168	37739906	37773745	ZNF573
chr16	16091648	16093013	2.08	5.61	-3.53	0.000388	0.0168	16097992	16106868	ABCC1
chr2	159422225	159423169	-0.25	4.42	-4.67	0.000389	0.0169	159400599	159419867	BAZ2B
chr16	27474968	27476765	2.35	5.69	-3.34	0.000389	0.0169	27470109	27476528	GTF3C1
chr5	172945881	172946730	1.44	5.23	-3.79	0.000389	0.0169	172958729	172969716	RPL26L1
chr2	101864061	101865387	-0.25	4.5	-4.75	0.00039	0.0169	101866493	101867730	MAP4K4
chr6	157131141	157132729	1.57	5.24	-3.67	0.00039	0.0169	157148624	157208688	ARID1B
chr21	31464477	31465204	-0.25	4.57	-4.82	0.000391	0.0169	31118416	31558977	TIAM1
chr6	30730284	30730914	0.46	4.62	-4.16	0.000393	0.017	30721699	30725426	TUBB
chr17	44519828	44520662	-0.25	4.29	-4.55	0.000394	0.017	44473290	44503430	GPATCH8
chr3	12513740	12513978	-0.25	4.3	-4.56	0.000396	0.0171	12503446	12505574	TSEN2
chr2	119367847	119370210	1.54	5.33	-3.79	0.000396	0.0171	119370217	119372500	DBI
chr1	147593117	147593471	-0.25	4.24	-4.49	0.000396	0.0171	147600196	147611693	BCL9
chr17	37297764	37298744	-0.25	4.33	-4.58	0.000396	0.0171	37084994	37299767	ACACA
chr3	31535520	31536186	-0.25	4.3	-4.55	0.000396	0.0171	31533625	31617005	STT3B
chr1	226967580	226968587	-0.25	4.59	-4.84	0.000398	0.0171	226974855	226977487	COQ8A
chr19	795720	796730	1.24	5.01	-3.78	0.000399	0.0171	797075	812327	PTBP1
chr3	176322097	176323255	-0.25	4.26	-4.51	0.000399	0.0171	176515103	176515151	MIR7977
chr2	48343084	48344709	1.4	5.23	-3.82	0.000399	0.0171	48346217	48375565	FOXN2
chr2	201913555	201914164	-0.25	4.35	-4.6	0.000399	0.0171	201854790	201893383	CDK15
chr11	118482797	118485035	2.68	6.12	-3.44	0.0004	0.0172	118482423	118483204	KMT2A
chr10	74197942	74199500	0.21	4.59	-4.39	0.000401	0.0172	74176770	74708934	ADK
chr19	23360760	23362025	-0.25	4.24	-4.49	0.000402	0.0172	23362125	23395418	ZNF91
chr18	62889516	62893368	2.89	6.37	-3.48	0.000404	0.0173	62903150	62958726	PHLPP1
chr1	121318376	121322146	1.4	5.21	-3.81	0.000404	0.0173	121360156	121397905	SRGAP2-AS1
chr5	60825481	60826772	0.72	4.92	-4.2	0.000406	0.0174	60764230	60843538	ELOVL7
chr6	138457873	138459137	2	5.47	-3.47	0.000407	0.0174	138435213	138435294	MIR3145
chr4	150941116	150942275	1.26	5	-3.74	0.000407	0.0174	150264689	150871425	LRBA
chr1	204853592	204854972	1.29	5.3	-4.01	0.000408	0.0174	204870604	204945032	NFASC
chr22	33398248	33401572	2.24	6.07	-3.84	0.000408	0.0174	33166734	33384227	LARGE1
chr10	72622439	72624986	2.24	6.07	-3.83	0.000408	0.0174	72562711	72626074	MICU1
chr18	62801202	62802352	1.74	5.49	-3.75	0.000409	0.0174	62779399	62860513	PHLPP1
chr6	111504647	111510450	2.31	6.42	-4.11	0.00041	0.0175	111484652	111576590	TRAF3IP2-AS1
chr9	123019347	123020671	1.4	5.27	-3.86	0.00041	0.0175	123033509	123074310	RABGAP1
chr6	42784790	42786762	1.98	5.79	-3.82	0.000411	0.0175	42782027	42868560	BICRAL
chr16	31733674	31734902	0.13	4.6	-4.46	0.000411	0.0175	31713306	31754484	ZNF720
chr11	106094531	106095775	0.69	4.65	-3.96	0.000412	0.0175	106091467	106098699	AASDHPPT
chr9	69721668	69723794	1.66	5.48	-3.81	0.000412	0.0175	69718021	69723571	PTAR1
chr11	6953889	6954819	1.09	4.91	-3.82	0.000413	0.0176	6943190	6956533	ZNF215
chr2	188530983	188531500	0.9	4.79	-3.88	0.000414	0.0176	188529172	188588701	GULP1
chr11	10080998	10082128	-0.25	4.32	-4.58	0.000414	0.0176	9993012	10044606	SBF2
chr19	48115603	48116201	-0.25	4.23	-4.48	0.000415	0.0176	48115446	48116174	LIG1
chr6	89662493	89664119	1.54	5.35	-3.81	0.000415	0.0176	89670918	89672574	MDN1
chr7	128318021	128319065	0.44	4.62	-4.18	0.000415	0.0176	128310397	128321425	RBM28
chr1	246608478	246610575	0.55	4.87	-4.32	0.000415	0.0176	246566514	246633957	CNST
chr9	96844947	96845939	-0.25	4.28	-4.54	0.000415	0.0176	96816991	96853072	ZNF782
chr5	65781481	65783613	1.4	5.9	-4.5	0.000415	0.0176	65781416	65823328	NLN
chr2	226965177	226965676	0.69	4.69	-4	0.000415	0.0176	226935199	226995675	RHBDD1
chr10	86796670	86797791	-0.25	4.81	-5.06	0.000416	0.0176	86756650	86932838	BMPR1A
chr6	28356725	28360557	3.09	6.73	-3.64	0.000416	0.0176	28324740	28356271	ZSCAN31
chr17	30490005	30492461	1.54	5.27	-3.73	0.000417	0.0176	30477442	30522558	GOSR1
chr8	9016784	9019895	2.02	5.81	-3.79	0.000417	0.0176	9016332	9116746	ERI1
chr21	46260789	46261703	2.02	5.4	-3.38	0.000417	0.0176	46235133	46259265	MCM3AP
chr7	143440229	143440998	-0.25	4.23	-4.48	0.000417	0.0176	143443453	143444409	TAS2R60
chr1	21300076	21300907	-0.25	4.53	-4.79	0.000418	0.0176	21272746	21298999	ECE1
chr6	57128445	57130547	0.72	4.85	-4.13	0.000419	0.0176	57152157	57154160	ZNF451
chr2	229847043	229848790	1.16	4.93	-3.77	0.000419	0.0177	229836863	229859282	TRIP12
chr5	134789727	134792241	-0.25	4.56	-4.81	0.00042	0.0177	134790153	134829932	DDX46
chr7	24613532	24620103	2.96	7.22	-4.26	0.00042	0.0177	24623668	24624070	MPP6
chr18	32052358	32054535	2.15	5.95	-3.8	0.000421	0.0177	32042079	32068428	RNF125
chr11	10856886	10857394	-0.25	4.36	-4.61	0.000421	0.0177	10854737	10857637	ZBED5
chr16	22057377	22058693	1.79	5.35	-3.56	0.000422	0.0177	22092538	22110912	VWA3A
chr5	75482104	75483470	1.4	5.22	-3.82	0.000423	0.0178	75371121	75506004	CERT1
chr17	21744876	21747041	-0.25	4.33	-4.59	0.000423	0.0178	21692523	21704612	KCNJ18
chr7	127824364	127826184	1.66	5.47	-3.81	0.000423	0.0178	127887912	128084850	SND1
chr22	46733770	46735058	1.26	5.01	-3.76	0.000424	0.0178	46735159	46738090	CERK
chr6	28362851	28364387	2.27	5.85	-3.57	0.000425	0.0178	28324740	28356271	ZSCAN31
chr12	108663051	108665971	-0.25	4.38	-4.63	0.000427	0.0179	108648963	108658832	CORO1C
chr10	48479030	48479862	1.11	4.82	-3.71	0.000427	0.0179	48453301	48479206	ARHGAP22
chr2	189661783	189662697	0.44	4.55	-4.11	0.000428	0.0179	189661521	189666401	ASDURF
chr3	141965963	141967615	1.54	5.28	-3.74	0.00043	0.0179	141952829	141963835	TFDP2
chr2	207769129	207769499	-0.25	4.27	-4.52	0.00043	0.0179	207762598	207769906	FZD5
chr15	25364002	25365737	2.09	5.5	-3.41	0.00043	0.0179	25354407	25357575	UBE3A
chr1	233379171	233380058	-0.25	4.34	-4.59	0.00043	0.0179	233375783	233385147	MAP3K21
chr7	24353911	24355496	2.07	5.89	-3.82	0.000432	0.018	24285107	24291824	NPY
chr10	97271729	97278858	2.31	6.22	-3.91	0.000432	0.018	97225309	97270664	ARHGAP19
chr11	93536841	93540750	2.38	6.48	-4.1	0.000433	0.018	93478941	93537915	SMCO4
chr1	86742648	86743292	-0.25	4.31	-4.56	0.000433	0.018	86734244	86738695	SH3GLB1
chr4	41069018	41069797	-0.25	4.22	-4.47	0.000435	0.0181	40890309	41014385	APBB2
chr2	169632448	169633154	0.15	4.58	-4.44	0.000435	0.0181	169631437	169636241	PPIG
chr7	135420985	135423452	-0.25	4.73	-4.98	0.000435	0.0181	135361798	135415214	CNOT4
chr3	43310309	43311711	0.21	4.78	-4.57	0.000437	0.0181	43303112	43333390	SNRK
chr9	101558580	101561355	1.88	5.65	-3.77	0.000437	0.0181	101560681	101561452	RNF20
chr22	31229693	31230382	0.46	4.5	-4.04	0.000437	0.0181	31212298	31280080	LIMK2
chr8	11854920	11856741	2.27	5.87	-3.6	0.000438	0.0181	11853358	11854925	CTSB
chr3	155734665	155735552	1.09	4.9	-3.81	0.000438	0.0181	155479881	155745067	PLCH1
chr5	18636510	18637417	-0.25	4.24	-4.5	0.000439	0.0182	17926819	17930441	LINC02223
chr12	106869305	106869820	0.13	4.45	-4.31	0.00044	0.0182	106870823	106886360	RIC8B
chr15	38265863	38267042	1.26	5.19	-3.93	0.00044	0.0182	38253181	38339771	SPRED1
chr2	66263686	66264275	-0.25	4.29	-4.54	0.00044	0.0182	66358249	66358328	MIR4778
chr1	227191097	227191954	-0.25	4.34	-4.6	0.000441	0.0182	227199557	227254155	CDC42BPA
chr1	150073927	150074676	0.69	4.73	-4.04	0.000442	0.0183	150077189	150145304	VPS45
chr4	164881800	164883816	-0.25	4.42	-4.67	0.000442	0.0183	164877242	164898965	APELA
chr22	45848669	45849249	-0.25	4.3	-4.55	0.000444	0.0183	45793596	45843797	ATXN10
chr6	35881988	35883272	1.44	5.19	-3.75	0.000446	0.0184	35869589	35870990	SRPK1
chr1	225551258	225553931	1.88	5.7	-3.82	0.000447	0.0184	225519044	225567270	ENAH
chr18	21807551	21808809	-0.25	4.21	-4.46	0.000447	0.0184	21803733	21819558	MIB1
chr2	36479445	36480301	-0.25	4.29	-4.54	0.000447	0.0184	36479543	36499412	CRIM1
chr6	15534158	15535662	-0.25	5.57	-5.82	0.000447	0.0184	15524112	15533547	DTNBP1
chr5	151749423	151750028	-0.25	4.51	-4.76	0.000448	0.0184	151742822	151752118	ATOX1
chr1	11820447	11821108	-0.25	4.21	-4.46	0.000448	0.0184	11829849	11834308	CLCN6
chr2	11297505	11300845	2.96	6.35	-3.38	0.000448	0.0184	11221327	11287737	ROCK2
chr2	30238844	30240714	1.4	5.17	-3.77	0.000448	0.0184	30234266	30257700	LBH
chr4	98881877	98882386	1.16	4.82	-3.66	0.000449	0.0184	98881010	98890898	EIF4E
chr3	10009368	10010327	1.24	4.94	-3.7	0.000449	0.0184	10006445	10009131	EMC3
chr1	179985116	179986253	1.4	5.13	-3.73	0.00045	0.0184	179986182	179992221	CEP350
chr1	205252837	205254798	2.67	6.1	-3.43	0.000452	0.0185	205256201	205272252	TMCC2
chr1	178355804	178356441	0.9	4.84	-3.93	0.000452	0.0185	178341471	178484147	RASAL2
chr17	31096337	31099911	-0.25	4.7	-4.95	0.000452	0.0185	31095208	31374287	NF1
chr3	195864699	195865923	1.57	5.2	-3.63	0.000452	0.0185	195863365	195869690	TNK2
chr4	1953501	1955393	1.29	5.03	-3.74	0.000453	0.0185	1955579	1958018	NSD2
chr14	54632416	54633423	0.83	4.85	-4.02	0.000453	0.0185	54652683	54702396	SAMD4A
chr8	86370060	86371252	0.9	4.78	-3.87	0.000456	0.0186	86374041	86467476	WWP1
chr15	81845307	81847218	2.09	5.73	-3.64	0.000457	0.0186	82041778	82046018	MEX3B
chr3	160522160	160525157	1.98	5.66	-3.67	0.000457	0.0186	160504958	160521796	KPNA4
chr2	96014772	96016568	-0.25	4.2	-4.45	0.000457	0.0186	96013730	96021608	FAHD2CP
chr9	126492381	126492725	-0.25	4.31	-4.57	0.000457	0.0186	126480813	126507041	MVB12B
chr2	206766122	206771364	2.92	7.12	-4.21	0.000459	0.0187	206765647	206791946	FASTKD2
chr7	139411525	139415841	2.96	6.53	-3.56	0.000459	0.0187	139416125	139423156	LUC7L2
chr4	151020818	151022533	2.2	6	-3.8	0.00046	0.0187	151012829	151015727	LRBA
chr4	182657516	182658012	0.15	4.35	-4.2	0.00046	0.0187	182680324	182755353	TENM3
chr11	36500066	36501097	-0.25	4.38	-4.63	0.000461	0.0187	36490377	36496510	TRAF6
chr15	84632207	84632696	-0.25	4.28	-4.53	0.000462	0.0188	84631963	84642066	SCAND2P
chr8	70346837	70349202	1.29	5.08	-3.78	0.000463	0.0188	70112070	70402079	NCOA2
chr2	222922533	222922742	-0.25	4.19	-4.44	0.000464	0.0188	222920954	222927053	ACSL3
chr6	89636263	89638310	1.66	5.38	-3.72	0.000464	0.0188	89634807	89638401	LYRM2
chr11	107424915	107425667	0.44	4.49	-4.05	0.000465	0.0188	107326360	107443031	CWF19L2
chr12	76030121	76032078	1.98	5.72	-3.74	0.000465	0.0188	76025447	76031604	PHLDA1
chr8	920777	921859	1.13	4.96	-3.84	0.000465	0.0188	883328	1105066	DLGAP2
chr4	75647345	75651745	2.76	6.88	-4.12	0.000465	0.0188	75647024	75649102	G3BP2
chr21	9347540	9348042	-0.25	4.31	-4.56	0.000466	0.0188	9529934	9559268	LOC105379511
chr20	58693832	58695317	1.44	5.16	-3.72	0.000466	0.0188	58694421	58713580	STX16-NPEPL1
chr1	11208088	11208846	-0.25	4.35	-4.61	0.000467	0.0188	11193627	11195178	ANGPTL7
chr17	49834226	49835139	0.72	4.75	-4.03	0.000468	0.0189	49826002	49827130	KAT7
chr6	57372143	57376382	2.26	5.68	-3.43	0.000468	0.0189	57379947	57435192	PRIM2
chr1	220543121	220544834	-0.25	4.59	-4.84	0.000468	0.0189	220528850	220579508	MARK1
chr8	115628016	115629040	-0.25	4.27	-4.52	0.00047	0.0189	115413814	115620070	TRPS1
chr4	73060009	73060870	0.21	4.5	-4.29	0.00047	0.0189	73058076	73069692	COX18
chr8	42514162	42515236	0.15	4.4	-4.25	0.00047	0.0189	42472249	42502628	SLC20A2
chr2	3302092	3302881	1.35	4.94	-3.59	0.000472	0.019	3188925	3320544	EIPR1
chr4	39587161	39588356	1.89	5.53	-3.65	0.000472	0.019	39551610	39583958	SMIM14
chr2	188424892	188431371	3.48	7.34	-3.86	0.000472	0.019	188139637	188384313	LINC01090
chr1	226941113	226941741	0.46	4.51	-4.04	0.000473	0.019	226940379	226977523	COQ8A
chr18	9720659	9722712	1.88	5.6	-3.72	0.000474	0.019	9708323	9758151	RAB31
chr10	112952026	112952703	-0.25	4.43	-4.69	0.000474	0.019	112950916	113141316	TCF7L2
chr2	203501082	203501749	-0.25	4.25	-4.5	0.000475	0.0191	203444850	203495353	RAPH1
chr17	6088355	6089834	0.94	4.77	-3.83	0.000476	0.0191	6081882	6090361	WSCD1
chr11	9166653	9168969	1.66	5.4	-3.74	0.000477	0.0191	9139504	9172245	DENND5A
chr16	8817021	8819299	0.69	4.69	-3.99	0.000477	0.0191	8807564	8849325	PMM2
chr5	137954341	137958488	3.13	6.77	-3.63	0.000477	0.0191	137953346	137954624	FAM13B
chr11	93683965	93687192	2.27	5.73	-3.47	0.000477	0.0191	93691681	93695620	CEP295
chr15	59092676	59093567	-0.25	4.21	-4.46	0.000477	0.0191	59093402	59095511	RNF111
chr1	212967020	212967761	-0.25	4.78	-5.03	0.000478	0.0191	212966957	212972918	VASH2
chr12	132106059	132107708	-0.25	4.22	-4.47	0.000478	0.0191	132104021	132127177	EP400P1
chr2	26227338	26229056	1.7	5.42	-3.72	0.000478	0.0191	26232202	26235304	HADHA
chr20	44557188	44557869	0.91	4.68	-3.77	0.000479	0.0191	44564201	44614768	PKIG
chr9	78271854	78273077	1.44	5.3	-3.86	0.00048	0.0191	78264050	78271883	CEP78
chr2	224511827	224519496	2.87	7.05	-4.18	0.00048	0.0191	224505749	224511411	CUL3
chr8	38116962	38120124	2.89	6.39	-3.5	0.000481	0.0191	38119095	38128378	ASH2L
chr8	137409397	137410182	-0.25	4.29	-4.54	0.000481	0.0192	137811485	137837849	LOC401478
chr1	220025816	220027430	1.66	5.44	-3.78	0.000481	0.0192	219997176	220007365	EPRS1
chr19	19093188	19093649	-0.25	4.29	-4.54	0.000481	0.0192	19095943	19106934	SLC25A42
chr20	50553942	50554408	0.13	4.38	-4.25	0.000482	0.0192	50585786	50585879	MIR645
chr6	73446930	73447640	-0.25	4.28	-4.53	0.000483	0.0192	73439743	73445685	CGAS
chr17	16453902	16455623	2.31	6.16	-3.85	0.000483	0.0192	16441577	16448294	LRRC75A
chr15	38345823	38346349	0.15	4.42	-4.27	0.000483	0.0192	38253181	38339771	SPRED1
chr12	27030981	27031832	1.13	4.89	-3.76	0.000483	0.0192	27022577	27066240	MED21
chr3	40534569	40537063	2.75	6.32	-3.58	0.000483	0.0192	40529288	40532861	ZNF621
chr22	35901837	35902853	1.4	5.26	-3.86	0.000485	0.0192	35743983	35938897	RBFOX2
chr3	54832714	54833166	-0.25	4.28	-4.53	0.000485	0.0192	54874605	54901255	CACNA2D3-AS1
chr11	95914345	95917321	1.96	5.41	-3.44	0.000485	0.0192	95835336	95913077	MTMR2
chr11	3928388	3930099	0.94	5.01	-4.07	0.000486	0.0192	3947343	4055565	STIM1
chr20	62362855	62366872	3.4	7.09	-3.68	0.000486	0.0192	62345414	62367270	LAMA5
chr6	33133005	33134915	1.92	5.76	-3.83	0.000486	0.0192	33144783	33147767	HCG24
chr4	52615243	52616703	1.78	5.35	-3.57	0.000486	0.0192	52626093	52628366	USP46
chr2	195624302	195627333	-0.25	4.79	-5.04	0.000487	0.0192	195656747	195737702	SLC39A10
chr12	79637106	79638069	0.55	4.66	-4.11	0.000488	0.0193	79574979	79597982	PAWR
chr2	85298639	85299911	0.69	4.81	-4.12	0.000488	0.0193	85303393	85304364	TCF7L1
chr3	126888399	126889114	1.73	5.18	-3.45	0.000488	0.0193	126854864	126949879	CHCHD6
chr12	62867941	62868243	0.72	4.62	-3.9	0.000489	0.0193	62801941	62840228	PPM1H
chr20	43612472	43613518	-0.25	4.51	-4.77	0.00049	0.0193	43613850	43624122	IFT52
chr8	38345308	38345906	-0.25	4.24	-4.49	0.000491	0.0193	38319755	38326835	NSD3
chr3	45430305	45431261	2.34	5.67	-3.34	0.000491	0.0193	45388836	45548599	LARS2
chr1	26478638	26479125	-0.25	4.42	-4.68	0.000491	0.0193	26473429	26475360	HMGN2
chr7	143306449	143307873	1.77	5.56	-3.79	0.000492	0.0193	143316111	143352083	CLCN1
chr7	133018803	133019083	-0.25	4.21	-4.47	0.000492	0.0193	133034860	133034915	MIR3654
chr16	29858676	29861260	2.49	6.02	-3.52	0.000492	0.0193	29858358	29859469	CDIPT
chr19	23121302	23122471	1.29	5.04	-3.74	0.000493	0.0193	23117025	23147221	ZNF730
chr1	229335065	229337564	1.66	5.39	-3.73	0.000493	0.0193	229321515	229340633	CCSAP
chr6	157011852	157019869	3.06	7.32	-4.26	0.000494	0.0194	157022286	157208694	ARID1B
chr1	171586624	171588432	1.29	5.04	-3.75	0.000495	0.0194	171587073	171592223	PRRC2C
chr10	27135235	27136624	1.54	5.25	-3.71	0.000496	0.0194	27123547	27136337	YME1L1
chr1	19647615	19648535	0.69	4.76	-4.06	0.000496	0.0194	19647610	19658456	NBL1
chr1	32560163	32560924	0.21	4.55	-4.35	0.000497	0.0194	32539429	32600990	ZBTB8A
chr2	65225874	65226620	0.15	4.49	-4.34	0.000497	0.0194	65227753	65271253	ACTR2
chr2	36515862	36516814	0.95	4.96	-4.01	0.000497	0.0194	36513690	36529512	CRIM1
chr9	137791726	137793872	2.83	6.42	-3.59	0.000497	0.0194	137790888	137813444	EHMT1
chr1	219975201	219975796	1.21	4.87	-3.65	0.000498	0.0195	219968689	219969247	EPRS1
chr16	13099998	13100791	0.51	4.5	-3.99	0.0005	0.0195	13082380	13235293	SHISA9
chr4	183676220	183677047	1.4	5.18	-3.78	0.000501	0.0196	183683849	183712869	TRAPPC11
chr8	25440637	25442009	-0.25	4.2	-4.45	0.000504	0.0197	25446150	25450611	KCTD9
chr16	89721721	89724349	2.11	5.95	-3.84	0.000506	0.0197	89722869	89738589	ZNF276
chr17	6907688	6908096	0.46	4.57	-4.11	0.000506	0.0197	6898910	6900345	ALOX12P2
chr10	62257587	62257927	0.21	4.36	-4.16	0.000507	0.0198	62238157	62268707	RTKN2
chr1	92747733	92749902	0.72	4.82	-4.1	0.000508	0.0198	92736560	92784966	EVI5
chr12	45853506	45856461	2.46	6.34	-3.88	0.000508	0.0198	45852295	45908040	ARID2
chr1	161798099	161799369	1.54	5.26	-3.73	0.000509	0.0198	161766320	161964070	ATF6
chr17	2087211	2088456	1.09	5.03	-3.93	0.000509	0.0198	2059846	2088761	SMG6
chr2	174096936	174097691	-0.25	4.2	-4.45	0.000509	0.0198	174075190	174079351	OLA1
[truncated: 1,656 more rows]

## Sheet: iPSC, WT v RNF20 Het2, WT up
Chromosome	Start	End	Mean Concentration of Reads in WT	Mean Concentration of Reads in RNF20 Het2	Fold	p-value	FDR	Gene Start	Gene End	SYMBOL
chr21	10538605	10541230	6.57	-0.28	6.85	3.45e-09	2.81e-06	10521575	10605716	TPTE
chr18	15409217	15410769	6.61	-0.28	6.89	3.69e-09	2.86e-06	15307663	15330282	LOC644669
chr21	10805190	10808116	6.47	-0.28	6.75	3.44e-08	1.16e-05	10521575	10605716	TPTE
chr21	10802321	10803610	6.01	-0.28	6.29	6.03e-08	1.65e-05	10521575	10605716	TPTE
chr1	125166930	125168722	6.24	-0.28	6.52	7.43e-08	1.88e-05	121519345	121568791	EMBP1
chr17	22977390	22978588	6.24	-0.28	6.52	7.89e-08	1.95e-05	22523111	22524663	MTRNR2L1
chr21	7961921	7964061	6.11	-0.28	6.4	8.97e-08	2.13e-05	7816675	7829926	KCNE1B
chr7	62401287	62406467	6.25	-0.28	6.53	1.59e-07	3.15e-05	63291518	63303988	ZNF733P
chr22	10782121	10784558	7.03	1.47	5.57	2.96e-07	5e-05	10939388	10961338	FRG1FP
chr22	10726406	10730807	7.3	1.59	5.71	3.19e-07	5.32e-05	10939388	10961338	FRG1FP
chr1	143190004	143191249	6.25	0.93	5.33	5.39e-07	7.55e-05	143419625	143420207	LSP1P5
chr17	21764022	21765991	5.86	0.75	5.11	7.32e-07	9.42e-05	21692523	21704612	KCNJ18
chr21	9006228	9007273	5.7	-0.28	5.98	7.72e-07	9.77e-05	8986999	8987178	MIR3648-1
chr14	19729323	19730302	5.66	-0.28	5.94	8.22e-07	0.000102	19719015	19827513	OR4N2
chr20	28870707	28873122	5.41	-0.28	5.7	1.23e-06	0.000139	29080390	29102761	FRG1DP
chr14	106339965	106341424	5.48	-0.28	5.77	1.29e-06	0.000144	106287674	106288828	LINC00226
chr19	27365229	27367191	5.41	-0.28	5.7	1.3e-06	0.000144	27681072	27793138	LINC00662
chr10	42085037	42086754	6.82	-0.28	7.1	1.58e-06	0.000167	42336101	42353011	LOC441666
chr15	23046935	23050061	6.44	0.74	5.7	1.64e-06	0.000171	23000284	23039572	TUBGCP5
chr21	7242596	7245503	5.67	0.33	5.35	1.66e-06	0.000173	7081004	7087229	LOC102723360
chr21	10424579	10428277	7.04	2.3	4.74	1.72e-06	0.000176	10413532	10491615	BAGE2
chr17	26846659	26849358	5.38	-0.28	5.66	1.87e-06	0.000188	27293910	27293996	MIR4522
chr22	16455955	16457608	5.36	-0.28	5.64	2.46e-06	0.000229	16590751	16592810	CCT8L2
chr19	27391584	27393985	5.81	-0.28	6.09	2.59e-06	0.000237	27681072	27793138	LINC00662
chr14	19433641	19437889	5.57	-0.28	5.85	3.5e-06	0.000296	19402486	19434341	POTEG
chr14	19926453	19928229	5.54	-0.28	5.82	4.68e-06	0.000365	19920582	19921659	OR4K5
chr20	29694722	29695901	5.18	-0.28	5.46	5.21e-06	0.000396	29548661	29559705	FAM242B
chr22_KI270733v1_random	118501	126068	6.14	-0.28	6.42	6.51e-06	0.000461	128877	129029	RNA5-8SN4
chr20	29205677	29206839	5.16	-0.28	5.44	7.56e-06	0.000512	29080390	29102761	FRG1DP
chr22	12378566	12380180	5.29	0.54	4.75	7.76e-06	0.000521	11827523	11910358	LOC102723769
chr14	18655131	18659274	7	1.28	5.72	1.06e-05	0.000654	18630318	18633634	LINC02297
chr7	57486103	57488937	5.58	-0.28	5.86	1.1e-05	0.000674	57450177	57473559	ZNF716
chr1	143245448	143246001	5.48	-0.28	5.76	1.12e-05	0.000683	143419625	143420207	LSP1P5
chr20	29943091	29944301	5	-0.28	5.28	1.27e-05	0.000745	30278906	30289205	LINC01597
chr20	29286550	29288466	5.19	0.55	4.63	1.5e-05	0.000838	29415264	29416911	FRG2EP
chr14	106327098	106328237	4.95	-0.28	5.23	1.55e-05	0.000854	106287674	106288828	LINC00226
chr10	38941608	38943881	5.94	1.08	4.85	1.65e-05	0.000897	38696424	38697902	ACTR3BP5
chr21	5311822	5314253	4.82	-0.28	5.1	2.46e-05	0.0012	5130871	5154658	LOC102724159
chrY	56857508	56859125	5.65	-0.28	5.93	2.73e-05	0.00131	56954332	56968979	SPRY3
chr15	22246308	22248379	5.47	-0.28	5.75	3.26e-05	0.00148	22225278	22225329	MIR1268A
chr20	29395625	29396465	4.86	-0.28	5.14	3.38e-05	0.00152	29415264	29416911	FRG2EP
chr14	18664164	18670211	7.39	2.36	5.03	3.54e-05	0.00156	18630318	18633634	LINC02297
chr9	63891851	63894041	4.92	-0.28	5.2	3.71e-05	0.00161	63832127	63859641	FRG1JP
chr9	113428168	113429323	5.14	0.99	4.15	4.41e-05	0.00183	113444731	113597738	RGS3
chr14	19833915	19835205	5.8	2.04	3.76	4.43e-05	0.00183	19821935	19830253	OR4N2
chr4	190020656	190022770	5.55	0.05	5.5	4.64e-05	0.0019	190024351	190027254	FRG2
chr10	42099103	42100104	5.19	-0.28	5.47	5.43e-05	0.00212	42336101	42353011	LOC441666
chr19	27372742	27375229	4.84	-0.28	5.13	5.62e-05	0.00217	27681072	27793138	LINC00662
chr9	61668341	61668594	5.35	-0.28	5.63	5.73e-05	0.00221	61854148	61924750	FAM27C
chr9	61670073	61671181	4.9	-0.28	5.18	6e-05	0.00227	61854148	61924750	FAM27C
chr10	42093846	42095478	5.35	-0.28	5.63	6.26e-05	0.00235	42336101	42353011	LOC441666
chr22	10768962	10769723	4.68	0.05	4.63	6.87e-05	0.00251	10939388	10961338	FRG1FP
chr15	20416363	20418733	5.33	1.08	4.25	6.99e-05	0.00254	20439270	20440670	HERC2P3
chr7	62344550	62346623	4.64	-0.28	4.92	7.32e-05	0.00262	63291518	63303988	ZNF733P
chr21	10648884	10650179	5.18	-0.28	5.46	7.68e-05	0.00269	10521575	10605716	TPTE
chr10	38498398	38499184	4.54	-0.28	4.82	7.73e-05	0.0027	38403189	38452153	LINC00999
chr10	38485085	38485688	4.68	-0.28	4.96	7.86e-05	0.00273	38403189	38452153	LINC00999
chr19	24392020	24393258	5.04	0.33	4.71	8.88e-05	0.003	24162370	24163425	HAVCR1P1
chr9	40930107	40931544	5.36	0.18	5.17	9.23e-05	0.00309	40929010	40929092	MIR1299
chr8	43386956	43387549	4.62	-0.28	4.91	9.45e-05	0.00315	43292483	43363518	POTEA
chr22	11043168	11044586	4.83	-0.28	5.11	9.45e-05	0.00315	10939388	10961338	FRG1FP
chr5	50056575	50059558	5.1	-0.28	5.38	9.82e-05	0.00324	50398027	50411998	EMB
chr21	10387864	10388905	4.87	0.54	4.33	0.000105	0.0034	10413477	10452529	BAGE2
chr21	10788400	10789366	4.97	0.75	4.22	0.000108	0.00347	10521575	10605716	TPTE
chr14_GL000194v1_random	134343	136419	5.07	-0.28	5.35	0.00011	0.00352	53594	115055	MAFIP
chr1	143249667	143250558	4.93	0.54	4.39	0.000118	0.00369	143419625	143420207	LSP1P5
chr17	21685894	21687549	4.52	-0.28	4.8	0.00012	0.00374	21692523	21704612	KCNJ18
chrUn_GL000218v1	73274	75116	4.87	0.75	4.12	0.000121	0.00376	51867	54893	LOC389834
chr21	9757514	9759281	5.62	1.57	4.04	0.00013	0.00397	9806875	9809723	LINC01667
chr13	17995165	17998728	4.56	-0.28	4.84	0.000135	0.00406	18195297	18232024	FAM230C
chr1	124098504	124100474	6.59	2.15	4.45	0.000137	0.00408	121519345	121568791	EMBP1
chr7	62430790	62431390	4.51	-0.28	4.79	0.00014	0.00414	63291518	63303988	ZNF733P
chr21	5230370	5233323	6.86	2.94	3.92	0.00014	0.00416	5130871	5154658	LOC102724159
chr4	49208186	49210150	4.45	-0.28	4.74	0.000142	0.00419	49028692	49031276	CWH43
chr14	19851837	19852852	5.52	1.06	4.46	0.000147	0.00429	19868197	19869143	OR4K3
chr1	123445658	123452923	4.96	-0.28	5.24	0.00015	0.00435	121519345	121568791	EMBP1
chr21	10017015	10017345	4.39	-0.28	4.67	0.000151	0.00439	9781910	9816833	LINC01667
chr8	6656362	6656830	4.37	-0.28	4.65	0.000154	0.00445	6618475	6648807	MCPH1-AS1
chr14	19675567	19681576	7.38	2.73	4.65	0.000157	0.00449	19719015	19827513	OR4N2
chrX	49589555	49591598	5.53	1.47	4.06	0.00016	0.00456	49589529	49596827	GAGE2C
chr17	21815578	21817517	5.15	-0.28	5.43	0.000163	0.00461	21692523	21704612	KCNJ18
chr7	20668191	20669286	4.38	-0.28	4.66	0.000171	0.00477	20647422	20755624	ABCB5
chr17	55216230	55217028	4.79	-0.28	5.07	0.000172	0.00481	55264960	55325187	HLF
chrUn_GL000219v1	46448	47423	5.03	-0.28	5.31	0.000179	0.00496	54224	83311	LOC283788
chr14	18954998	18956599	4.93	-0.28	5.21	0.000195	0.00526	18967434	18998903	POTEM
chr1	125181566	125183792	9.38	3.8	5.57	0.000197	0.0053	121519345	121568791	EMBP1
chr21	9588018	9588527	4.7	-0.28	4.99	0.000202	0.00539	9634244	9679906	LOC105379514
chr13	17587415	17593209	4.34	-0.28	4.62	0.000206	0.00545	18195297	18232024	FAM230C
chr20	28803678	28810417	7.28	3.4	3.88	0.000215	0.00558	28564916	28602843	FRG1CP
chr20	28781585	28783432	6.16	2.16	4	0.00022	0.00568	28564916	28602843	FRG1CP
chr9	63807430	63808151	4.3	-0.28	4.58	0.000225	0.00578	63819574	63819654	MIR4477B
chr10	71434380	71434927	4.33	-0.28	4.62	0.000234	0.00591	71439832	71717907	CDH23
chr6	150776759	150777684	4.31	-0.28	4.59	0.000234	0.00591	150768686	150842056	PLEKHG1
chr21	10019932	10020746	4.47	-0.28	4.75	0.000236	0.00595	9781910	9816833	LINC01667
chr1	143226817	143228045	4.58	0.05	4.53	0.000268	0.00651	143419625	143420207	LSP1P5
chr19	24352623	24354461	4.65	0.05	4.6	0.000269	0.00653	24162370	24163425	HAVCR1P1
chr1	124349588	124353493	4.81	0.77	4.04	0.000276	0.00664	121519345	121568791	EMBP1
chr7	62396200	62397259	4.84	1.13	3.71	0.000277	0.00666	63291518	63303988	ZNF733P
chr10	38509227	38510256	4.29	-0.28	4.58	0.000287	0.00683	38403189	38452153	LINC00999
chr10	42305595	42306730	4.47	-0.28	4.75	0.000291	0.00688	42336101	42353011	LOC441666
chr6	42922976	42923434	4.47	-0.28	4.75	0.000293	0.00691	42929192	42938170	CNPY3
chr2	94539970	94541671	4.87	0.55	4.32	0.000301	0.00703	94582873	94585473	LOC100133920
chr20	29864022	29864729	4.24	-0.28	4.52	0.000308	0.00715	29548661	29559705	FAM242B
chr21	10362973	10363671	4.52	-0.28	4.8	0.000309	0.00718	10413477	10452529	BAGE2
chr1	43722904	43723964	4.44	-0.28	4.72	0.000312	0.00723	43709392	43727343	LOC101929592
chrUn_GL000219v1	125738	126754	4.87	0.54	4.33	0.000315	0.00726	54224	83311	LOC283788
chr1	124601870	124604213	4.21	-0.28	4.49	0.000321	0.00734	121519345	121568791	EMBP1
chr14	105672450	105673203	4.4	0.18	4.22	0.000323	0.00738	105640168	105640232	MIR8071-1
chr14	19900070	19902683	6.34	2.52	3.82	0.000325	0.00741	19920582	19921659	OR4K5
chr22	15784091	15786576	4.89	-0.28	5.17	0.000326	0.00742	15784959	15827434	DUXAP8
chr13	17561014	17569499	4.41	-0.28	4.69	0.000345	0.00772	18195297	18232024	FAM230C
chr22	15680810	15685239	5.13	1.37	3.76	0.000361	0.00796	15690026	15721631	POTEH
chr2	92072883	92073786	5.11	1.22	3.89	0.000364	0.00801	91940668	91942040	ACTR3BP2
chr17	41217236	41217796	4.19	-0.28	4.47	0.000371	0.00812	41226648	41227652	KRTAP9-2
chr2	161278609	161278950	4.81	0.93	3.89	0.000373	0.00814	161246431	161266090	LOC101929512
chr1	124166130	124169905	5.42	1	4.42	0.000382	0.00829	121519345	121568791	EMBP1
chr15	52891170	52891400	4.58	0.77	3.81	0.000386	0.00834	52757315	52791078	ONECUT1
chr1	68859787	68860211	4.43	0.18	4.25	0.000387	0.00835	69055838	69229597	LINC01707
chr13	17653973	17657762	4.22	0.05	4.16	0.00042	0.0088	18195297	18232024	FAM230C
chr22	12351163	12354132	4.87	0.75	4.12	0.000424	0.00885	11827523	11910358	LOC102723769
chr14	105686536	105687125	4.16	-0.28	4.44	0.000429	0.00892	105640168	105640232	MIR8071-1
chr3	90513110	90513518	4.1	-0.28	4.38	0.000438	0.00907	89107676	89479659	EPHA3
chr20	28812697	28813343	4.6	-0.28	4.89	0.000464	0.00947	28564916	28602843	FRG1CP
chr5	14027083	14027801	4.62	0.75	3.86	0.000467	0.0095	13690331	13944543	DNAH5
chr1	122790547	122794103	4.66	0.93	3.74	0.000469	0.00954	121519345	121568791	EMBP1
chr14	19704131	19706660	4.84	-0.28	5.12	0.000471	0.00957	19719015	19827513	OR4N2
chr21	9932550	9932827	4.11	-0.28	4.39	0.000476	0.00963	9781910	9816833	LINC01667
chr14	19213215	19215329	5.39	1.74	3.65	0.00048	0.00968	19301704	19316800	BMS1P22
chr14	19261255	19268557	5.81	1.57	4.24	0.00048	0.00969	19301704	19316800	BMS1P22
chr21	5241961	5245207	6.33	2.87	3.46	0.000495	0.00989	5130871	5154658	LOC102724159
chr16	34752601	34752751	4.39	0.33	4.06	0.000499	0.00996	35040164	35084313	CCNYL3
chr22	11347318	11349922	4.76	0.18	4.57	0.000511	0.0101	10939388	10961338	FRG1FP
chr18	15404795	15406118	4.77	-0.28	5.05	0.000522	0.0103	15307663	15330282	LOC644669
chr13	17339845	17340936	4.47	-0.28	4.76	0.000532	0.0104	18195297	18232024	FAM230C
chr21	9968313	9968770	4.28	-0.28	4.57	0.000552	0.0107	9781910	9816833	LINC01667
chr20	28523287	28526328	4.48	0.49	3.98	0.000563	0.0108	28580709	28602664	FRG1CP
chr20	29333947	29334433	4.6	-0.28	4.88	0.000579	0.0111	29415264	29416911	FRG2EP
chr12	123934008	123934469	4.31	0.18	4.13	0.000583	0.0111	123931791	123933439	DNAH10
chr13	16121683	16124849	5.72	1.35	4.37	0.000587	0.0112	18195297	18232024	FAM230C
chr21	7271826	7273783	5.26	1.26	4	0.000608	0.0115	7430659	7467182	LOC102724951
chr2	91869704	91870331	5.07	1.52	3.55	0.000615	0.0116	91940668	91942040	ACTR3BP2
chr1	143237082	143242099	8.25	3.59	4.66	0.000627	0.0117	143419625	143420207	LSP1P5
chr5	49756213	49759266	4.56	-0.28	4.84	0.000627	0.0117	50398027	50411998	EMB
chr21	10607009	10608626	4.52	-0.28	4.8	0.000629	0.0118	10521575	10605716	TPTE
chr13	17255034	17261185	5.02	1.44	3.59	0.000635	0.0118	18195297	18232024	FAM230C
chr1	217968451	217968767	4.02	-0.28	4.31	0.000638	0.0119	218043505	218059140	LINC01653
chr15	20191713	20192367	4	-0.28	4.28	0.000652	0.012	20282744	20291558	CHEK2P2
chr11	34460726	34461507	4.16	-0.28	4.44	0.000653	0.012	34460733	34464199	CAT
chr8	1300362	1301350	4.5	0.77	3.74	0.000664	0.0122	1296034	1302607	LOC286083
chr15	68404027	68404551	4.15	0.18	3.97	0.000681	0.0124	68296533	68432162	ITGA11
chr6	61399558	61399891	4.02	-0.28	4.3	0.000685	0.0124	61574328	61574402	MTRNR2L9
chr16	36096020	36097563	4.48	-0.28	4.76	0.000688	0.0125	35748357	35755796	LINC02167
chr14	19194553	19195395	4.28	-0.28	4.57	0.000713	0.0128	19301704	19316800	BMS1P22
chr20	30822719	30822976	3.99	-0.28	4.27	0.000723	0.0129	30403123	30403384	MLLT10P1
chr10	21426923	21427897	4.03	-0.28	4.32	0.00073	0.013	21340233	21372950	LINC02643
chr3	90523209	90524078	4.48	-0.28	4.76	0.000741	0.0131	89107676	89479659	EPHA3
chr21	9902460	9904298	5.85	2.3	3.55	0.000741	0.0131	9781910	9816833	LINC01667
chr14	19283862	19285810	4.6	-0.28	4.89	0.000747	0.0132	19301704	19316800	BMS1P22
chr13	17712974	17713352	3.98	-0.28	4.26	0.000749	0.0132	18195297	18232024	FAM230C
chr20	30924150	30925009	4.63	0.93	3.71	0.000755	0.0133	31257664	31259632	DEFB115
chr1	143192146	143195746	9.93	4.27	5.67	0.000757	0.0133	143419625	143420207	LSP1P5
chr21	9570557	9571938	5.12	1.59	3.52	0.000758	0.0133	9529934	9559268	LOC105379511
chr12	35199598	35200555	3.94	-0.28	4.22	0.000767	0.0134	34022496	34028302	ALG10
chr17	26787916	26788845	4.43	-0.28	4.71	0.000775	0.0135	27293910	27293996	MIR4522
chr14	19862228	19862863	4.74	-0.28	5.02	0.00078	0.0136	19868197	19869143	OR4K3
chr1	123511870	123513778	6	2.16	3.84	0.000783	0.0136	121519345	121568791	EMBP1
chr11	96472869	96473428	4.09	-0.28	4.37	0.00079	0.0137	96447132	96506826	JRKL-AS1
chr4	190114499	190115536	4.71	1.08	3.63	0.000797	0.0138	190065233	190065914	DBET
chr20	28884522	28885321	4.22	-0.28	4.5	0.000816	0.014	29080390	29102761	FRG1DP
chr13	17387855	17390430	5.36	1.67	3.7	0.000831	0.0142	18195297	18232024	FAM230C
chr19	1528309	1529366	5.17	1.73	3.44	0.000835	0.0143	1528337	1529048	PLK5
chr2	91586912	91587554	4.16	-0.28	4.45	0.000837	0.0143	91636688	91655378	LSP1P4
chr22	12372838	12374905	4.65	1.06	3.6	0.000843	0.0143	11827523	11910358	LOC102723769
chr21	10554952	10555421	4.6	0.93	3.67	0.000846	0.0144	10521575	10605716	TPTE
chr14	19343369	19351483	6.23	2.02	4.21	0.000857	0.0145	19331866	19337730	DUXAP10
chr7	149868472	149868884	4.15	-0.28	4.44	0.000859	0.0145	149872968	149880649	ATP6V0E2
chr1	124127665	124129554	4	-0.28	4.29	0.000864	0.0146	121519345	121568791	EMBP1
chr16	34747481	34749118	4.4	-0.28	4.68	0.000867	0.0146	35040164	35084313	CCNYL3
chr16	46406825	46408403	4.89	1.08	3.81	0.000877	0.0147	46474122	46478439	ANKRD26P1
chr10	41847446	41849202	4.4	-0.28	4.68	0.000896	0.015	42336101	42353011	LOC441666
chr13	17541280	17551308	4.07	0.05	4.01	0.000909	0.0151	18195297	18232024	FAM230C
chr21	9648386	9649163	4.4	-0.28	4.68	0.000913	0.0152	9634244	9679906	LOC105379514
chr21	10683180	10687381	6.93	3.26	3.66	0.000922	0.0153	10521575	10605716	TPTE
chr6	2400362	2400969	4.32	-0.28	4.6	0.000945	0.0155	2396572	2399866	GMDS-DT
chr21	9790095	9791117	3.88	-0.28	4.17	0.000964	0.0157	9806875	9809723	LINC01667
chr14	19365081	19367975	4.84	1.06	3.79	0.000964	0.0157	19331866	19337730	DUXAP10
chr6	52792491	52793402	5.03	1.44	3.6	0.000986	0.016	52791664	52799297	GSTA1
chr4	9213026	9213866	4	0.05	3.94	0.000987	0.016	9215405	9216997	USP17L11
chr17	26827499	26828648	4.39	-0.28	4.68	0.001	0.0162	27293910	27293996	MIR4522
chr1	143248177	143249016	6.62	1.06	5.56	0.00102	0.0164	143419625	143420207	LSP1P5
chr21	5319239	5320773	4.28	-0.28	4.56	0.00105	0.0167	5130871	5154658	LOC102724159
chr1	143184166	143188022	8.1	3.64	4.46	0.00106	0.0169	143419625	143420207	LSP1P5
chr17	32733242	32733658	4.62	1.08	3.54	0.00107	0.017	32658979	32721135	MYO1D
chr10	41845267	41846624	4.37	-0.28	4.65	0.00107	0.017	42336101	42353011	LOC441666
chr15	30372812	30373278	3.88	-0.28	4.16	0.00109	0.0172	30380353	30386987	CHRFAM7A
chr19	38855469	38856153	3.85	-0.28	4.13	0.00115	0.0178	38836395	38852347	HNRNPL
chr5	47114568	47115936	4.74	1.26	3.48	0.00116	0.0179	45641701	45696498	HCN1
chr9	39009098	39010158	4.6	1.13	3.46	0.00119	0.0182	39078818	39086148	CNTNAP3
chr1	143274784	143275862	4.29	-0.28	4.58	0.00119	0.0182	143419625	143420207	LSP1P5
chr20	28839002	28843197	7.96	4.18	3.78	0.00119	0.0182	28564916	28602843	FRG1CP
chr3	17248094	17249735	4.16	-0.28	4.44	0.0012	0.0183	17337389	17372134	TBC1D5
chr20	29039246	29040145	4.68	1.27	3.41	0.00121	0.0184	29080390	29102761	FRG1DP
chr15	42678457	42678637	3.78	-0.28	4.06	0.00123	0.0186	42675496	42682213	STARD9
chr18	37556584	37557417	4.27	-0.28	4.55	0.00124	0.0187	37528967	37565608	CELF4
chr19	24355321	24356992	4.64	0.33	4.32	0.00125	0.0188	24162370	24163425	HAVCR1P1
chr20	28552150	28554539	3.83	-0.28	4.11	0.00128	0.0191	28580709	28602664	FRG1CP
chr21	10024387	10024889	4.24	-0.28	4.53	0.00131	0.0194	9781910	9816833	LINC01667
chr3	43149939	43150584	3.83	-0.28	4.11	0.00132	0.0195	43079234	43106079	POMGNT2
chr22	15637132	15640460	5.13	2.05	3.08	0.00134	0.0197	15690026	15721631	POTEH
chr13	16023704	16024233	3.9	-0.28	4.19	0.0014	0.0204	18195297	18232024	FAM230C
chr16	16635107	16636265	4.72	1.39	3.33	0.00141	0.0205	16390834	16393808	NPIPA7
chr1	220439201	220439903	4.44	0.75	3.68	0.00144	0.0208	220528183	220664456	MARK1
chr13	53015556	53015926	4.39	0.49	3.89	0.00148	0.0212	53028813	53052057	OLFM4
chr3	38560591	38560794	3.84	-0.28	4.12	0.00149	0.0213	38552981	38554549	SCN5A
chr19	6312849	6313772	4.54	0.33	4.21	0.00149	0.0213	6306142	6333612	ACER1
chr7	63757648	63762473	4.21	0.16	4.05	0.00153	0.0217	63621090	63621169	MIR4283-1
chr16	36114263	36114619	3.88	-0.28	4.16	0.00153	0.0217	35748357	35755796	LINC02167
chr15	29585524	29585678	3.94	-0.28	4.22	0.00154	0.0217	29120254	29570723	FAM189A1
chr11	111796579	111796797	3.92	0.18	3.73	0.00154	0.0218	111786286	111809690	ALG9
chr10	69618731	69619153	4.24	0.77	3.47	0.0016	0.0224	69630247	69633596	FAM241B
chr22	12307420	12308158	3.93	-0.28	4.22	0.00161	0.0225	11827523	11910358	LOC102723769
chr6	27429897	27430296	3.97	0.05	3.91	0.00163	0.0226	27388992	27400769	ZNF391
chr20	32502325	32502889	4.56	0.49	4.06	0.00164	0.0227	32509959	32520285	LOC101929698
chr15	21069010	21070331	4.1	-0.28	4.38	0.00164	0.0227	21019388	21020851	FAM30C
chr13	16113384	16114887	5.37	1.35	4.02	0.00166	0.0229	18195297	18232024	FAM230C
chr19	54332282	54332591	3.81	-0.28	4.1	0.00166	0.0229	54308915	54337168	LILRA4
chr14	99734187	99734864	3.88	-0.28	4.16	0.00168	0.0231	99737693	99909416	EML1
chr1	124925123	124926168	4.09	0.54	3.56	0.00175	0.0238	121519345	121568791	EMBP1
chr10	39546016	39546430	4.08	-0.28	4.36	0.00176	0.0238	38696424	38697902	ACTR3BP5
chr21	13010668	13010984	4.13	0.49	3.63	0.00177	0.0239	13038160	13052118	ANKRD30BP2
chr15	22286382	22287188	4.52	0.49	4.03	0.0018	0.0242	22278971	22282872	REREP3
chr15	75797236	75798082	3.68	-0.28	3.96	0.00181	0.0243	75759501	75762405	MIR4313
chr5	26040875	26041400	3.88	-0.28	4.16	0.00181	0.0243	25297734	25311370	LINC02211
chr10	38486401	38489217	5.16	0.93	4.23	0.00181	0.0243	38403189	38452153	LINC00999
chr22	11589122	11589439	3.91	0.16	3.75	0.00183	0.0245	11827523	11910358	LOC102723769
chr2	17465607	17466839	3.67	-0.28	3.96	0.00184	0.0245	17510584	17518439	RAD51AP2
chr2	37963940	37964141	4.12	0.05	4.07	0.00185	0.0246	37974691	37989610	RMDN2
chr7	60047038	60047767	3.68	-0.28	3.97	0.00187	0.0248	57450177	57473559	ZNF716
chr7	143518467	143518739	3.88	0.05	3.83	0.00187	0.0248	143477873	143478796	TAS2R41
chr9	60519170	60520154	5.08	1.47	3.61	0.00187	0.0248	60914374	60920650	SPATA31A7
chrY	56821621	56824175	4.2	-0.28	4.48	0.00188	0.0248	56954332	56968979	SPRY3
chr10	41557582	41559972	3.72	-0.28	4	0.00188	0.0249	42336101	42353011	LOC441666
chr21	9862113	9863213	4.94	1.92	3.02	0.00189	0.0249	9781910	9816833	LINC01667
chr18	79618492	79620713	5.6	2.3	3.3	0.00195	0.0254	79578063	79589010	LOC284240
chr21	8209642	8215489	4.06	-0.28	4.34	0.00196	0.0255	8212572	8212724	RNA5-8SN4
chr4	49560373	49562083	4.06	-0.28	4.34	0.00196	0.0255	49028692	49031276	CWH43
chr1	123584553	123586850	4.03	-0.28	4.31	0.00197	0.0256	121519345	121568791	EMBP1
chr12	2726519	2727276	4.03	-0.28	4.31	0.00197	0.0256	2689863	2691200	CACNA1C-AS1
chr1	124777448	124779294	4.12	-0.28	4.4	0.00201	0.0259	121519345	121568791	EMBP1
chr10	40277120	40278282	3.81	0.05	3.75	0.00207	0.0265	38696424	38697902	ACTR3BP5
chr22	15664994	15667525	5.19	2.05	3.14	0.0021	0.0267	15690026	15721631	POTEH
chr3	112112610	112113092	4.12	-0.28	4.41	0.0021	0.0267	112112801	112112898	MIR567
chr13	93762204	93765114	3.99	0.49	3.49	0.00211	0.0268	93818424	93836144	GPC6-AS2
chrUn_GL000219v1	91791	93301	5.22	1.47	3.75	0.00212	0.0269	54224	83311	LOC283788
chr19	15642104	15642825	5.03	1.74	3.3	0.00214	0.027	15641309	15659771	CYP4F3
chr3	33613359	33613820	3.83	-0.28	4.12	0.00214	0.027	33573170	33584798	CLASP2
chrUn_GL000218v1	37435	38401	3.83	-0.28	4.12	0.00214	0.027	51867	54893	LOC389834
chr7	65799385	65800252	3.88	-0.28	4.16	0.00214	0.027	65647010	65770810	LOC441242
chr20	30414858	30416127	4.04	-0.28	4.32	0.00214	0.027	30403123	30403384	MLLT10P1
chr1	40251623	40252077	4.06	-0.28	4.34	0.00214	0.0271	40247937	40251684	TMCO2
chr10	97948849	97949821	4.63	1.21	3.42	0.00216	0.0272	97865000	97936278	CRTAC1
chr21	9792397	9792992	5.18	2.22	2.96	0.00216	0.0272	9806875	9809723	LINC01667
chr12	35965175	35966574	4.66	0.93	3.74	0.00219	0.0274	34022496	34028302	ALG10
chr2	216308291	216308629	3.74	-0.28	4.02	0.00219	0.0274	216257865	216372483	MARCHF4
chr12	40581480	40582000	3.98	-0.28	4.26	0.0022	0.0275	40569625	40570832	MUC19
chr1	124761650	124762074	4.18	-0.28	4.47	0.00222	0.0277	121519345	121568791	EMBP1
chr20	28909945	28910697	3.98	-0.28	4.26	0.00223	0.0278	29080390	29102761	FRG1DP
chr16	22694783	22695867	4.18	0.05	4.12	0.00225	0.028	22814162	22916338	HS3ST2
chr1	59718836	59719137	3.87	-0.28	4.15	0.00226	0.028	59733227	59733296	MIR4711
chr8	10486838	10487066	3.71	-0.28	4	0.00227	0.0281	10479536	10480992	LINCR-0001
chr21	10423632	10423942	4.49	0.55	3.93	0.00234	0.0287	10413532	10491615	BAGE2
chr22	15632426	15633480	4.63	0.49	4.13	0.00234	0.0287	15690026	15721631	POTEH
chr5	113047291	113047572	3.95	-0.28	4.23	0.00235	0.0288	113048563	113064040	MCC
chr20	29095226	29096222	4.04	-0.28	4.32	0.00236	0.0289	29080390	29102761	FRG1DP
chr9	36116298	36116799	4.01	-0.28	4.3	0.00237	0.0289	36136536	36163913	GLIPR2
chr10	38800509	38801889	4.72	1.35	3.37	0.00238	0.029	38696424	38697902	ACTR3BP5
chr3	93778287	93778490	3.6	-0.28	3.88	0.00238	0.029	93877003	93886413	PROS1
chr2	112366729	112367977	3.72	0.05	3.66	0.00238	0.029	112400095	112401560	RGPD5
chr14	19159379	19165261	7.56	3.82	3.74	0.00242	0.0293	19062406	19093914	DUXAP9
chr21	10665263	10665799	4.67	0.55	4.11	0.00244	0.0295	10521575	10605716	TPTE
chr1	2683696	2684904	6.59	3.19	3.41	0.00244	0.0295	2590639	2633016	MMEL1
chr2	187555863	187557254	3.97	-0.28	4.25	0.00245	0.0295	187496972	187554492	TFPI
chr9	64014250	64015612	4.4	1.08	3.32	0.00246	0.0296	63832127	63859641	FRG1JP
chr14	19330764	19335266	4.04	-0.28	4.32	0.00247	0.0296	19324359	19331502	DUXAP9
chr18	67910	68391	3.97	-0.28	4.25	0.0025	0.0299	47390	49557	TUBB8B
chr1	122969684	122970546	3.93	-0.28	4.21	0.00251	0.03	121519345	121568791	EMBP1
chr20	29221690	29222156	3.93	-0.28	4.21	0.00251	0.03	29080390	29102761	FRG1DP
chrY	9502692	9504922	3.99	-0.28	4.27	0.00252	0.0301	9499341	9504941	FAM197Y3
chr5	133841916	133842346	4.11	0.77	3.35	0.00253	0.0302	133913677	133917269	WSPAR
chr2	54770395	54771497	4.33	1.06	3.28	0.00253	0.0302	54724542	54972018	EML6
chr20	36638616	36639100	3.93	-0.28	4.21	0.00255	0.0303	36612519	36645881	SLA2
chr18	15387045	15387378	3.76	-0.28	4.05	0.00256	0.0304	15307663	15330282	LOC644669
chr5	110242109	110242651	3.6	-0.28	3.88	0.00256	0.0304	110289233	110430101	TMEM232
chr20	31453512	31454086	4.06	-0.28	4.34	0.00257	0.0305	31440632	31450257	DEFB123
chr7	72158286	72158519	4.18	0.18	4	0.00259	0.0307	71779491	72336995	CALN1
chr20	29812381	29813748	4.52	1.06	3.47	0.0026	0.0307	29548661	29559705	FAM242B
chr22	15572276	15573699	3.76	-0.28	4.04	0.00261	0.0307	15528192	15529139	OR11H1
chr8	1248312	1249323	4.14	0.05	4.08	0.00264	0.031	1250373	1262580	DLGAP2
chr22	10964839	10965984	3.73	-0.28	4.02	0.00266	0.0312	10939388	10961338	FRG1FP
chr17	21858494	21859484	4.69	1.56	3.13	0.00267	0.0312	21692523	21704612	KCNJ18
chr10	41583220	41584570	5.45	2.48	2.97	0.00268	0.0313	42336101	42353011	LOC441666
chr16	30046451	30046797	3.62	-0.28	3.9	0.00268	0.0313	30035423	30052923	TLCD3B
chr21	5290776	5291713	4.09	0.49	3.6	0.00273	0.0317	5130871	5154658	LOC102724159
chr17	25483610	25483870	3.69	-0.28	3.97	0.00276	0.0319	27293910	27293996	MIR4522
chr14	19733859	19735284	5.69	1.94	3.75	0.00276	0.0319	19747428	19748369	OR4Q3
chr10	38898268	38898795	3.73	-0.28	4.01	0.00278	0.032	38696424	38697902	ACTR3BP5
chr21	5292349	5293188	4.02	-0.28	4.3	0.00279	0.0321	5130871	5154658	LOC102724159
chr19	38889915	38890275	4.09	0.05	4.03	0.00279	0.0321	38878557	38894108	SIRT2
chr21	10004418	10004753	4.06	0.55	3.5	0.0028	0.0322	9781910	9816833	LINC01667
chr21	10473064	10473684	4.57	1.22	3.35	0.00281	0.0322	10482738	10605716	TPTE
chr18	20577885	20578749	3.88	-0.28	4.16	0.00283	0.0324	20953290	20954870	ROCK1
chr3	90797356	90798772	4.16	0.55	3.61	0.00289	0.0328	89107676	89479659	EPHA3
chr2	89795638	89797781	4.39	-0.28	4.67	0.00289	0.0328	89622213	89640635	LOC101927050
chr9	66162344	66162731	3.67	-0.28	3.95	0.00293	0.0331	66159954	66164904	LOC642929
chr14	19796022	19804410	7.86	4.28	3.58	0.00296	0.0333	19803770	19830253	OR4N2
chr17	27008247	27009757	5.6	2.64	2.96	0.00296	0.0333	27293910	27293996	MIR4522
chr11	88263103	88263423	3.98	0.54	3.45	0.00298	0.0334	88293788	88299755	CTSC
chr21	10414565	10418594	7.72	3.93	3.79	0.003	0.0336	10413532	10491615	BAGE2
chr13	112476290	112476583	3.77	0.16	3.61	0.003	0.0336	112485844	112489823	TUBGCP3
chr10	41524872	41526176	4.37	-0.28	4.65	0.00301	0.0337	42336101	42353011	LOC441666
chr1	124592901	124593941	4.01	-0.28	4.29	0.00301	0.0337	121519345	121568791	EMBP1
chr6	143475489	143475835	3.85	-0.28	4.13	0.00305	0.034	143484979	143507327	PEX3
chrX	955063	955251	3.69	0.18	3.5	0.00305	0.034	1190897	1212634	CRLF2
chr14	19426432	19428033	3.93	-0.28	4.21	0.00305	0.034	19420975	19425017	LOC101929572
chrUn_GL000218v1	116076	118424	5.1	1.94	3.16	0.00308	0.0342	51867	54893	LOC389834
chr15	20411741	20414893	5.31	1.57	3.74	0.0031	0.0343	20439270	20440670	HERC2P3
chr11	57405662	57406235	4.21	0.33	3.88	0.00311	0.0343	57389155	57407879	PRG2
chr9	63828204	63829287	4.99	1.77	3.22	0.00313	0.0345	63819574	63819654	MIR4477B
chr18	50302767	50303161	3.95	0.55	3.39	0.00314	0.0346	50282343	50288304	CXXC1
chr19	27348383	27349679	4.09	-0.28	4.37	0.00315	0.0346	27681072	27793138	LINC00662
chr5	49743282	49745862	3.6	-0.28	3.88	0.00315	0.0346	50398027	50411998	EMB
chr22	15835178	15836100	5.14	1.67	3.47	0.00318	0.0349	15805812	15820884	BMS1P22
chr16	22543685	22544961	3.85	-0.28	4.14	0.00319	0.0349	22545698	22576865	OTOAP1
chr21	7994801	7996731	3.73	-0.28	4.02	0.00321	0.0351	7816675	7829926	KCNE1B
chrY	10671752	10672239	3.81	-0.28	4.09	0.00321	0.0351	9910798	9911962	TTTY23
chr1	123200417	123200995	5.53	2.62	2.91	0.00322	0.0351	121519345	121568791	EMBP1
chr13	16774394	16780735	4.53	0.33	4.2	0.00326	0.0354	18195297	18232024	FAM230C
chr1	123691946	123692437	5.63	1.98	3.65	0.00328	0.0355	121519345	121568791	EMBP1
chr17	26830097	26831873	5.03	2.22	2.81	0.00328	0.0355	27293910	27293996	MIR4522
chr7	153531103	153531632	3.79	-0.28	4.07	0.00329	0.0356	153399919	153413985	LINC01287
chr1	125073325	125074508	3.86	-0.28	4.14	0.0033	0.0356	121519345	121568791	EMBP1
chr21	9893757	9894211	4.4	0.55	3.85	0.00331	0.0357	9781910	9816833	LINC01667
chr19	27375342	27377016	6.02	2.92	3.1	0.00332	0.0357	27681072	27793138	LINC00662
chr10	42089148	42089533	4.89	1.06	3.84	0.00332	0.0357	42336101	42353011	LOC441666
chr2	55462331	55463116	4.44	0.55	3.89	0.00332	0.0357	55302730	55419895	CCDC88A
chr5	79591872	79592133	3.92	0.49	3.43	0.00335	0.0359	79612120	79623648	TENT2
chr2	204129231	204129716	3.5	-0.28	3.78	0.00336	0.036	203936780	203961577	ICOS
chr9	105444681	105445444	4.29	0.55	3.74	0.00336	0.036	105447796	105530963	FSD1L
chr7	83341454	83342418	5.08	1.77	3.31	0.00337	0.0361	83407140	83462160	SEMA3E
chr15_KI270727v1_random	50406	50942	3.96	0.55	3.41	0.00341	0.0364	136160	167567	POTEB3
chr13	72345937	72346125	3.67	-0.28	3.95	0.00344	0.0365	72708367	72727629	MZT1
chr17	59407590	59408841	4.3	0.54	3.76	0.00344	0.0365	59388840	59397149	YPEL2
chr6	3181634	3182119	3.55	-0.28	3.83	0.00345	0.0366	3182626	3195784	LINC02525
chr22	16061986	16062981	4.53	1.22	3.31	0.00348	0.0368	15805812	15820884	BMS1P22
chr12	117760935	117761489	3.6	-0.28	3.88	0.00348	0.0368	117517706	117677251	KSR2
chr7	61043985	61044921	4.22	0.55	3.66	0.00353	0.0372	63291518	63303988	ZNF733P
chr5	7844040	7844239	3.79	-0.28	4.08	0.00354	0.0373	7830378	7851133	C5orf49
chr7	63014917	63016084	4.33	1	3.33	0.00356	0.0374	63291518	63303988	ZNF733P
chr1	123028272	123029753	4.85	1.37	3.48	0.00358	0.0376	121519345	121568791	EMBP1
chr9	45082486	45082874	3.67	-0.28	3.95	0.00359	0.0376	43128968	43131569	LOC102724904
chr2	20432367	20432688	3.8	-0.28	4.08	0.00362	0.0378	20447074	20449440	RHOB
chr12	6643515	6643998	4.04	0.75	3.28	0.00362	0.0378	6638510	6643668	ACRBP
chr3	195754381	195754569	4.07	0.75	3.32	0.00362	0.0378	195747173	195753994	MUC4
chr2	94767750	94768006	3.46	-0.28	3.74	0.00364	0.038	94811046	94817801	ANKRD20A8P
chr14_GL000194v1_random	56125	56661	3.99	0.05	3.94	0.00369	0.0383	53590	115018	MAFIP
chr20	29121913	29123675	6.17	3.28	2.89	0.0037	0.0383	29080390	29102761	FRG1DP
chr10	38960278	38961724	3.92	-0.28	4.21	0.00371	0.0384	38696424	38697902	ACTR3BP5
chr3	90686394	90686600	3.83	-0.28	4.11	0.00373	0.0385	89107676	89479659	EPHA3
chr18	15167395	15168232	3.61	-0.28	3.89	0.00373	0.0385	15316485	15325919	LOC644669
chr1	124080221	124080824	4.15	-0.28	4.43	0.00375	0.0387	121519345	121568791	EMBP1
chr20	28943470	28944060	3.83	-0.28	4.11	0.00376	0.0387	29080390	29102761	FRG1DP
chr20	49337503	49338196	3.75	-0.28	4.03	0.00377	0.0388	49374800	49387005	KCNB1
chr2	46396986	46397668	3.64	-0.28	3.92	0.00379	0.0389	46392294	46394228	LINC01820
chr15	25173090	25173808	4.27	0.49	3.77	0.00379	0.039	25172979	25182051	SNHG14
chr1	123245488	123249227	3.39	-0.28	3.68	0.00385	0.0393	121519345	121568791	EMBP1
chr8	22283080	22284395	3.98	0.05	3.93	0.00385	0.0393	22279362	22355530	PIWIL2
chr17	27668017	27668856	3.73	-0.28	4.01	0.00387	0.0395	27644126	27649555	LGALS9
chr2	151603322	151604239	4.12	0.41	3.71	0.00388	0.0396	151615879	151617485	NEB
chr10	38901522	38903507	3.83	-0.28	4.11	0.0039	0.0397	38696424	38697902	ACTR3BP5
chr14	19277937	19281375	3.85	-0.28	4.13	0.00392	0.0398	19301704	19316800	BMS1P22
chr20	29458039	29458738	3.59	-0.28	3.87	0.00396	0.0401	29480147	29497179	FRG1EP
chr17	22890772	22892567	3.88	-0.28	4.16	0.00399	0.0403	22523111	22524663	MTRNR2L1
chr21	13004548	13005079	3.72	-0.28	4	0.00406	0.0408	13038160	13052118	ANKRD30BP2
chr5	139919442	139920089	3.98	0.18	3.8	0.00407	0.0408	139847917	139904397	NRG2
chr12	36598265	36599182	3.56	-0.28	3.85	0.00407	0.0408	38316762	38323982	ALG10B
chr15	96264575	96265030	3.72	-0.28	4	0.00412	0.0412	96266529	96275996	NR2F2-AS1
chr2	236275875	236276350	4.4	1.21	3.19	0.00414	0.0413	236214754	236264409	ASB18
chr21	10047054	10048781	3.63	0.18	3.45	0.00416	0.0414	9781910	9816833	LINC01667
chr14	19905687	19906645	4.93	1.38	3.54	0.00419	0.0416	19920582	19921659	OR4K5
chr16	34581067	34583879	11.79	6.4	5.39	0.0042	0.0417	34353616	34381110	CCNYL3
chr1	124562041	124564336	4.9	1.35	3.55	0.00421	0.0417	121519345	121568791	EMBP1
chr10	38577680	38577847	3.36	-0.28	3.64	0.00423	0.0418	38696424	38697902	ACTR3BP5
chr3	45818297	45818614	3.7	-0.28	3.98	0.00424	0.0419	45827128	45828573	LZTFL1
chr15	62819491	62819798	3.43	-0.28	3.71	0.00425	0.0419	62823957	62824041	MIR190A
chr2	89788850	89790361	4.93	1.22	3.71	0.00425	0.0419	89622213	89640635	LOC101927050
chr17	57149453	57150899	5.08	1.47	3.62	0.00425	0.0419	57116133	57121342	AKAP1
chr4	190046448	190047535	4.22	0.54	3.68	0.00425	0.0419	190064502	190067864	DBET
chr14	19872909	19874605	5.67	2.65	3.01	0.00426	0.042	19876232	19877309	OR4K2
chr9	100285561	100286016	4.11	1.12	2.99	0.00427	0.042	100302086	100307869	TEX10
chr22	47991319	47991977	4.01	0.55	3.45	0.00428	0.0421	48274364	48274415	MIR3201
chr18	54157570	54158148	4.21	0.54	3.67	0.00433	0.0425	54155254	54160113	MBD2
chr10	86139554	86140840	4.61	1.19	3.42	0.00434	0.0425	86264694	86264788	MIR346
chr21	9028358	9030635	6.07	3.17	2.9	0.00434	0.0425	8986999	8987178	MIR3648-1
chrY	10688825	10689559	3.35	-0.28	3.63	0.00435	0.0425	9910798	9911962	TTTY23
chr15	88429665	88430383	3.7	-0.28	3.99	0.00435	0.0426	88459478	88464813	MRPL46
chr15	46006842	46007246	3.73	-0.28	4.01	0.00439	0.0428	45879637	45928936	LOC105370802
chr15	22302987	22303595	3.97	0.18	3.78	0.0044	0.0428	22278971	22282872	REREP3
chr22	11620806	11621927	4.42	0.75	3.67	0.00446	0.0432	11827523	11910358	LOC102723769
chr22	12357077	12360687	5.47	2.42	3.05	0.00446	0.0432	11827523	11910358	LOC102723769
chr14	19955743	19956222	3.98	-0.28	4.26	0.00446	0.0433	19975444	19976659	OR4K15
chr11	57006096	57006582	3.77	-0.28	4.06	0.00451	0.0436	56988872	56989867	OR5AK2
chr4	51407934	51408980	3.35	-0.28	3.63	0.00454	0.0438	51843000	51914294	DCUN1D4
chrY	56864314	56864847	4.15	0.33	3.83	0.00456	0.0439	56954332	56968979	SPRY3
chr17	17895207	17895935	3.67	-0.28	3.95	0.00457	0.0439	17846825	17872064	TOM1L2
chr3	180671969	180672339	3.67	-0.28	3.95	0.00457	0.0439	180618368	180679459	CCDC39
chr14	19186428	19187663	4.14	0.93	3.22	0.00458	0.044	19301704	19316800	BMS1P22
chr15	92570388	92570691	4.05	0.33	3.72	0.00462	0.0443	92567820	92571697	LINC00930
chr17	44771376	44771757	3.68	-0.28	3.97	0.00467	0.0446	44769986	44780610	ADAM11
chr16	72087931	72088288	3.94	0.16	3.78	0.00467	0.0446	72086715	72093552	TXNL4B
chr19	54069443	54070132	3.67	-0.28	3.96	0.00471	0.0449	54048366	54063953	VSTM1
chr2	61806077	61806282	3.38	-0.28	3.66	0.00473	0.045	61827104	61836484	FAM161A
chr1	152658702	152658966	4.34	1.22	3.12	0.00473	0.045	152663380	152664659	LCE2D
chr13	17303810	17305613	4.94	1.22	3.72	0.00476	0.0452	18195297	18232024	FAM230C
chr17	35864454	35864749	3.59	-0.28	3.87	0.00476	0.0452	35855002	35868827	HEATR9
chr10	92952801	92953234	3.82	-0.28	4.1	0.00477	0.0452	92928374	93058524	EXOC6
chr2	94250404	94251380	4.7	1.59	3.1	0.00479	0.0453	94195806	94208379	BMS1P14
chr14	19814672	19815321	4.34	1.06	3.28	0.00485	0.0457	19821935	19830253	OR4N2
chr13	18335881	18336725	3.92	0.77	3.15	0.00487	0.0458	18211959	18230481	FAM230C
chr1	124096843	124097267	3.55	0.18	3.36	0.00489	0.0459	121519345	121568791	EMBP1
chr20	28543093	28544957	4.45	1.26	3.19	0.00491	0.046	28580709	28602664	FRG1CP
chr14	100180386	100181376	4.32	1.08	3.24	0.00491	0.046	100143957	100159645	DEGS2
chr22_KI270733v1_random	172137	173480	4.1	-0.28	4.39	0.00494	0.0462	173956	174108	RNA5-8SN4
chrUn_GL000218v1	150395	150915	3.81	-0.28	4.09	0.00496	0.0463	51867	54893	LOC389834
chr15	20031701	20032603	4.15	0.54	3.61	0.00497	0.0463	20282744	20291558	CHEK2P2
chr14	19352095	19353725	4.13	-0.28	4.42	0.00497	0.0463	19331866	19337730	DUXAP10
chr14	19508452	19509239	4.03	0.77	3.26	0.00501	0.0465	19402873	19434341	POTEG
chr3	37379603	37379894	3.36	-0.28	3.64	0.00502	0.0466	37381062	37412988	C3orf35
chr10	6387949	6389139	5.32	2.47	2.85	0.00502	0.0466	6350316	6352762	LINC02656
chr22_KI270733v1_random	170901	171747	3.68	-0.28	3.96	0.00503	0.0467	173956	174108	RNA5-8SN4
chr5	49781732	49784189	3.68	-0.28	3.96	0.00503	0.0467	50398027	50411998	EMB
chr16	46394219	46395205	11.48	5.77	5.71	0.00506	0.0468	46474122	46478439	ANKRD26P1
chr13	17878929	17880959	3.95	0.55	3.39	0.00506	0.0468	18195297	18232024	FAM230C
chr2	120240962	120241244	3.6	-0.28	3.88	0.00509	0.047	120240064	120289705	RALB
chr14_GL000194v1_random	9622	11146	5.11	2.02	3.09	0.0051	0.047	53590	115018	MAFIP
chr21	12978798	12981020	5.28	2.29	2.99	0.0051	0.0471	13038160	13052118	ANKRD30BP2
chr15	20422357	20422714	3.6	-0.28	3.88	0.00512	0.0471	20439270	20440670	HERC2P3
chr14_GL000194v1_random	7365	8601	4	0.33	3.67	0.00518	0.0475	53590	115018	MAFIP
chr1	49800560	49801408	3.31	-0.28	3.59	0.0052	0.0476	49527228	49851518	AGBL4
chr16	22611029	22611619	3.31	-0.28	3.59	0.0052	0.0476	22546964	22576682	OTOAP1
chr18	885163	885584	3.48	-0.28	3.77	0.00525	0.0479	904871	912172	ADCYAP1
chr4	120885526	120886160	4.15	1.2	2.95	0.00526	0.0479	120695111	120922681	PRDM5
chr16	75539348	75540332	3.95	-0.28	4.23	0.00531	0.0482	75538350	75542044	TMEM231
chr22	15810410	15812161	3.92	-0.28	4.2	0.00543	0.049	15805263	15815897	BMS1P18
chr6	114040436	114041029	3.32	-0.28	3.6	0.00545	0.0491	114055586	114062877	HS3ST5
chr1	5670201	5672880	5.23	2.34	2.89	0.00548	0.0493	5862672	5862741	MIR4689
chr20	7622142	7622602	4.24	1.06	3.18	0.00551	0.0494	7371608	7371692	MIR8062
chr2	32886548	32886886	3.28	-0.28	3.57	0.00551	0.0495	32882801	32926522	LINC00486
chr1	30701685	30702099	3.65	-0.28	3.93	0.00552	0.0495	30713767	30716135	MATN1
chr9	41694739	41695443	3.57	-0.28	3.85	0.00555	0.0497	41657708	41698910	FAM242F
chr2	93770731	93771562	3.61	-0.28	3.89	0.00557	0.0497	94196057	94203287	BMS1P14
chr1	123655731	123656398	4.06	0.54	3.52	0.00558	0.0498	121519345	121568791	EMBP1
chr14	19458960	19460281	3.35	-0.28	3.64	0.00558	0.0498	19402873	19434341	POTEG
chr11	116210791	116211954	3.3	-0.28	3.58	0.0056	0.0499	116639422	116658252	LINC02702

## Sheet: iPSC, WT v RNF20 Het2, WT down
Chromosome	Start	End	Mean Concentration of Reads in WT	Mean Concentration of Reads in RNF20 Het2	Fold	p-value	FDR	Gene Start	Gene End	SYMBOL
chr4	61752280	61763601	-0.16	8.84	-9.01	4.63e-12	2.93e-07	61895741	62072437	ADGRL3
chr4	92449104	92459865	-0.16	8.78	-8.94	6.74e-12	2.93e-07	92304657	93772498	GRID2
chr18	55554653	55564236	-0.16	8.41	-8.58	1.46e-11	3.71e-07	55222335	55553421	TCF4
chr4	92485990	92494016	-0.16	8.38	-8.55	1.92e-11	3.71e-07	92304657	93772498	GRID2
chr15	57060831	57071540	-0.16	8.29	-8.45	2.25e-11	3.71e-07	57063748	57092023	TCF12
chr13	60100808	60109743	-0.16	8.18	-8.34	2.56e-11	3.71e-07	60144648	60153678	DIAPH3-AS2
chr8	15590891	15602592	0.53	8.21	-7.68	3.46e-11	3.74e-07	15623078	15651017	TUSC3
chr4	128271621	128279942	-0.16	8.11	-8.27	3.77e-11	3.74e-07	128269256	128273061	PGRMC2
chr5	33461186	33467630	-0.16	8.06	-8.22	3.93e-11	3.74e-07	33466758	33468091	TARS1
chr11	76091050	76098412	-0.16	8.01	-8.17	4.3e-11	3.74e-07	76115900	76141660	UVRAG
chr8	123360269	123366734	-0.16	8.02	-8.18	5.06e-11	3.79e-07	123356100	123357621	ATAD2
chr21	31694468	31701105	0.53	7.92	-7.39	5.24e-11	3.79e-07	31683995	31701823	SCAF4
chr2	188374421	188380551	-0.16	7.86	-8.02	6.82e-11	4.45e-07	188139637	188384313	LINC01090
chr12	45798222	45805182	-0.16	7.96	-8.12	7.42e-11	4.45e-07	45836761	45908040	ARID2
chr12	14437411	14443781	-0.16	7.9	-8.06	7.68e-11	4.45e-07	14423761	14498247	ATF7IP
chr8	131919978	131928153	-0.16	7.8	-7.96	8.96e-11	4.81e-07	131938225	132010895	EFR3A
chr21	25941499	25948524	-0.16	7.8	-7.96	9.4e-11	4.81e-07	25881514	25897983	APP
chr12	14447696	14461137	-0.16	8.43	-8.59	1.12e-10	4.82e-07	14466110	14476154	ATF7IP
chr5	94252578	94259607	-0.16	7.83	-7.99	1.13e-10	4.82e-07	93621081	94111699	FAM172A
chr5	25433799	25439695	-0.16	7.87	-8.03	1.14e-10	4.82e-07	25297734	25311370	LINC02211
chr5	36945014	36953791	-0.16	8.05	-8.22	1.16e-10	4.82e-07	36954968	36975897	NIPBL
chr4	48673502	48679542	-0.16	7.62	-7.78	1.27e-10	5e-07	48620657	48681171	FRYL
chr1	8481168	8488850	-0.16	7.72	-7.89	1.32e-10	5e-07	8352406	8525939	RERE
chr3	143016931	143022261	-0.16	7.63	-7.79	1.47e-10	5.31e-07	143016892	143027270	U2SURP
chr6	136255267	136260897	-0.16	7.66	-7.82	1.63e-10	5.66e-07	136248691	136250335	MTFR2
chr13	20858600	20867969	1.18	8.44	-7.26	2.03e-10	6.48e-07	20868413	20902747	XPO4
chr18	79086800	79092390	0.23	7.47	-7.24	2.12e-10	6.48e-07	79087307	79277268	ATP9B
chr11	103066275	103071370	-0.16	7.51	-7.67	2.16e-10	6.48e-07	103066459	103082839	DCUN1D5
chr4	92262299	92267041	-0.16	7.57	-7.73	2.74e-10	7.93e-07	92268767	92277075	LNCPRESS2
chr9	71912208	71918159	-0.16	7.5	-7.66	2.9e-10	8.09e-07	71911802	71972843	C9orf85
chr11	93733341	93739503	0.78	7.8	-7.02	3.06e-10	8.09e-07	93733674	93733764	MIR1304
chr2	37206870	37211651	-0.16	7.35	-7.51	3.07e-10	8.09e-07	37201784	37212108	CEBPZ
chr17	20875061	20877939	0.81	7.61	-6.8	3.26e-10	8.32e-07	20868547	20932818	CCDC144NL-AS1
chr3	143041616	143045921	-0.16	7.39	-7.55	3.49e-10	8.48e-07	143036879	143038206	U2SURP
chr2	167388785	167393888	-0.16	7.4	-7.56	3.54e-10	8.48e-07	167248682	167259749	XIRP2
chr4	173173778	173181005	1.18	8.23	-7.05	3.61e-10	8.48e-07	173131928	173169652	LOC101930370
chr5	78255591	78262598	-0.16	7.34	-7.5	4.56e-10	1.03e-06	78002326	78294692	AP3B1
chr6	159750844	159755563	-0.16	7.28	-7.44	4.73e-10	1.03e-06	159684904	159745186	SOD2
chr9	15470063	15474129	-0.16	7.25	-7.41	4.75e-10	1.03e-06	15470990	15472750	PSIP1
chr2	207569757	207574370	-0.16	7.24	-7.4	5.33e-10	1.11e-06	207575286	207578065	CREB1
chr5	78279592	78286554	-0.16	7.23	-7.39	5.38e-10	1.11e-06	78002326	78294692	AP3B1
chr7	105229483	105233879	-0.16	7.19	-7.35	5.51e-10	1.11e-06	105160301	105203732	SRPK2
chr10	21619463	21623566	-0.16	7.34	-7.5	5.87e-10	1.12e-06	21624667	21673486	MLLT10
chr6	157027455	157032192	-0.16	7.26	-7.42	5.94e-10	1.12e-06	157030306	157141277	ARID1B
chr1	64524157	64528446	-0.16	7.31	-7.48	5.99e-10	1.12e-06	64505915	64693053	CACHD1
chr4	150942725	150946835	-0.16	7.24	-7.4	6.17e-10	1.12e-06	150264853	151015224	LRBA
chr1	173483097	173488095	-0.16	7.2	-7.37	6.36e-10	1.12e-06	173417793	173489407	LOC101928673
chr1	32633987	32640480	-0.16	7.28	-7.44	6.38e-10	1.12e-06	32621830	32634061	ZBTB8OS
chr4	92687116	92691867	0.78	7.37	-6.59	6.45e-10	1.12e-06	92822949	93112247	GRID2
chr6	127303554	127311655	0.78	7.54	-6.76	7.03e-10	1.2e-06	127289780	127315860	ECHDC1
chr4	92587019	92591268	-0.16	7.2	-7.36	7.27e-10	1.21e-06	92822949	93112247	GRID2
chr2	151435376	151441329	0.78	7.65	-6.87	7.47e-10	1.23e-06	151420225	151423760	RIF1
chr1	211401046	211413704	1.03	7.69	-6.67	7.71e-10	1.24e-06	211399258	211432534	LINC00467
chr4	152514804	152521097	-0.16	7.33	-7.49	8.24e-10	1.29e-06	152411160	152535191	FBXW7
chr5	157807177	157811785	-0.16	7.08	-7.24	8.35e-10	1.29e-06	157791620	157806012	CLINT1
chr2	168479666	168483434	-0.16	7.25	-7.41	8.43e-10	1.29e-06	168456249	168775134	CERS6
chr2	152663098	152668512	-0.16	7.23	-7.39	8.89e-10	1.33e-06	152663131	152663855	PRPF40A
chr6	149385342	149390178	-0.16	7.22	-7.38	9.55e-10	1.41e-06	149397692	149409617	TAB2
chr5	71502518	71507206	-0.16	7.14	-7.3	9.71e-10	1.41e-06	71494465	71511350	BDP1
chr9	71760798	71768216	-0.16	7.18	-7.34	1.02e-09	1.45e-06	71683985	71768386	CEMIP2
chr1	96793400	96799110	-0.16	7.36	-7.52	1.06e-09	1.47e-06	96806811	96812928	PTBP2
chr6	156921867	156924676	-0.16	7.03	-7.19	1.06e-09	1.47e-06	156935471	157152404	ARID1B
chr2	119865879	119877059	1.35	8.5	-7.15	1.1e-09	1.47e-06	119877323	119934960	PTPN4
chr6	157003049	157007134	-0.16	7.15	-7.31	1.1e-09	1.47e-06	157022286	157208694	ARID1B
chr1	193148687	193151980	-0.16	7.06	-7.23	1.2e-09	1.56e-06	193136503	193136583	MIR1278
chr2	188409419	188414662	-0.16	7.32	-7.48	1.22e-09	1.56e-06	188139637	188384313	LINC01090
chr6	24778176	24783018	-0.16	7.18	-7.34	1.23e-09	1.56e-06	24776866	24784119	GMNN
chr16	84730992	84733396	-0.16	6.99	-7.15	1.24e-09	1.56e-06	84733138	84744780	USP10
chr6	47563312	47574284	1.49	8.54	-7.05	1.26e-09	1.56e-06	47576513	47579906	CD2AP
chr14	70980271	70983699	-0.16	6.99	-7.16	1.29e-09	1.58e-06	70978378	71009868	PCNX1
chr2	231071940	231077583	-0.16	7.17	-7.33	1.34e-09	1.62e-06	231066904	231075566	PSMD1
chr1	174962958	174966654	-0.16	7.14	-7.3	1.36e-09	1.62e-06	174964768	174990485	RABGAP1L
chr10	19822836	19826245	-0.16	6.95	-7.11	1.47e-09	1.7e-06	19816432	20289856	PLXDC2
chr1	90919131	90923542	-0.16	7.15	-7.31	1.53e-09	1.72e-06	90916791	90918391	ZNF644
chr1	89859400	89863332	-0.16	7.03	-7.19	1.54e-09	1.72e-06	89846580	89933892	LRRC8D
chr12	45810853	45815162	-0.16	7.06	-7.22	1.57e-09	1.72e-06	45836761	45908040	ARID2
chr11	117031365	117036520	-0.16	6.94	-7.1	1.6e-09	1.72e-06	116845593	117098271	SIK3
chr4	92559740	92563883	-0.16	7.14	-7.3	1.6e-09	1.72e-06	92304657	93772498	GRID2
chr1	111148897	111152425	-0.16	6.92	-7.09	1.6e-09	1.72e-06	111147677	111184988	CEPT1
chr22	40598079	40601810	-0.16	6.92	-7.08	1.62e-09	1.72e-06	40519128	40636649	MRTFA
chr10	34535424	34538729	-0.16	6.96	-7.12	1.72e-09	1.79e-06	34312264	34426731	PARD3
chr15	25369793	25377677	1.63	8.17	-6.53	1.73e-09	1.79e-06	25376243	25419459	SNHG14
chr7	135446914	135453510	1.5	7.88	-6.37	1.76e-09	1.8e-06	135384290	135438331	CNOT4
chr2	174146317	174151172	-0.16	7.13	-7.29	1.78e-09	1.8e-06	174075409	174124315	OLA1
chr13	45232442	45236567	-0.16	6.94	-7.1	1.94e-09	1.93e-06	45219353	45267363	GTF2F2
chr3	185815382	185818745	-0.16	6.91	-7.07	1.96e-09	1.93e-06	185814055	185821103	IGF2BP2
chr6	13676261	13683332	-0.16	7.17	-7.33	1.99e-09	1.94e-06	13621498	13711835	RANBP9
chr6	125686176	125699130	1.67	8.87	-7.2	2.09e-09	2.02e-06	125701479	125720144	LINC02523
chr9	92058418	92065530	0.53	7.18	-6.65	2.16e-09	2.06e-06	92000087	92080076	SPTLC1
chr14	60270835	60276946	-0.16	6.95	-7.11	2.22e-09	2.1e-06	60256762	60283147	PPM1A
chr5	90565060	90569272	-0.16	6.93	-7.09	2.31e-09	2.16e-06	90558837	90627945	ADGRV1
chr13	79336406	79340288	-0.16	6.98	-7.14	2.34e-09	2.16e-06	79311824	79341212	RBM26
chr5	33441877	33448627	1.03	7.36	-6.34	2.5e-09	2.29e-06	33441381	33448730	TARS1
chr2	30507985	30510845	0.88	6.94	-6.06	2.64e-09	2.37e-06	30447403	30562193	LCLAT1
chr5	175926590	175931497	0.55	6.93	-6.38	2.64e-09	2.37e-06	175926559	175961117	THOC3
chr7	105091271	105096727	-0.16	6.93	-7.09	2.69e-09	2.39e-06	105101471	105102649	KMT2E
chr2	994326	999979	1.16	7.62	-6.46	2.72e-09	2.39e-06	950939	1367613	SNTG2
chr1	193172913	193176473	-0.16	6.81	-6.97	2.76e-09	2.4e-06	193186491	193251191	CDC73
chr22	45746727	45750950	-0.16	7.02	-7.18	2.81e-09	2.42e-06	45740510	45744817	ATXN10
chr16	13353379	13357508	0.78	6.97	-6.19	3.13e-09	2.67e-06	13082380	13235293	SHISA9
chr15	48166889	48171235	1	7.3	-6.3	3.18e-09	2.69e-06	48162695	48169910	MYEF2
chr11	9586471	9589496	-0.16	6.75	-6.92	3.3e-09	2.75e-06	9586714	9593457	WEE1
chr1	196554346	196557630	0.23	6.93	-6.71	3.32e-09	2.75e-06	196582413	196582481	MIR4735
chr5	113222713	113233995	-0.16	6.76	-6.93	3.41e-09	2.79e-06	113026132	113234677	MCC
chr11	77745682	77752691	0.53	7.55	-7.02	3.57e-09	2.84e-06	77702401	77764690	RSF1
chr6	38035143	38039975	0.53	7.05	-6.52	3.58e-09	2.84e-06	38061611	38062660	ZFAND3
chr6	21840572	21847110	1.65	7.58	-5.93	3.6e-09	2.84e-06	21885656	21999239	CASC15
chr4	145863261	145869354	-0.16	6.91	-7.07	3.67e-09	2.86e-06	145760765	145862006	ZNF827
chr1	81854162	81857643	-0.16	6.81	-6.97	4.08e-09	3.11e-06	81800397	81992422	ADGRL2
chr3	138749077	138754782	-0.16	6.78	-6.95	4.32e-09	3.27e-06	138652699	138759359	PIK3CB
chr6	21600619	21603240	0.53	6.74	-6.21	4.37e-09	3.27e-06	21593751	21598619	SOX4
chr12	45782279	45790032	1.75	8.59	-6.84	4.7e-09	3.49e-06	45836761	45908040	ARID2
chr5	157821527	157824776	0.78	6.88	-6.1	4.89e-09	3.58e-06	157791620	157806012	CLINT1
chr1	108694541	108700652	1.36	7.75	-6.39	4.9e-09	3.58e-06	108697700	108699385	PRPF38B
chr5	141174574	141179819	-0.16	7.28	-7.44	4.99e-09	3.6e-06	141177790	141180539	PCDHB8
chr17	67729058	67733090	0.53	6.89	-6.36	5.08e-09	3.6e-06	67736580	67737971	NOL11
chr6	135036559	135040730	1.16	7.32	-6.17	5.11e-09	3.6e-06	134964629	135027196	HBS1L
chr14	30594379	30599519	-0.16	7.02	-7.18	5.12e-09	3.6e-06	30598558	30615515	G2E3
chr4	41997909	42001592	-0.16	6.65	-6.81	5.13e-09	3.6e-06	41990530	42090461	SLC30A9
chr12	79575785	79579717	-0.16	6.7	-6.87	5.23e-09	3.64e-06	79584879	79596534	PAWR
chr6	47575084	47578901	-0.16	6.83	-6.99	5.35e-09	3.69e-06	47576513	47579906	CD2AP
chr9	107327985	107330006	0.78	6.88	-6.09	5.6e-09	3.8e-06	107306542	107332189	RAD23B
chr3	31585189	31588738	-0.16	6.8	-6.97	5.6e-09	3.8e-06	31596806	31620296	STT3B
chr5	50753235	50757178	-0.16	6.77	-6.93	6.24e-09	4.2e-06	50667893	50842342	PARP8
chr14	92028224	92032695	-0.16	6.82	-6.98	6.32e-09	4.2e-06	92030541	92040017	TRIP11
chr11	19847985	19852054	1.03	7.05	-6.02	6.32e-09	4.2e-06	19813718	19832601	NAV2
chr17	40388986	40397199	1.18	8.09	-6.91	6.7e-09	4.36e-06	40389562	40392101	TOP2A
chr7	101298809	101302413	1	6.96	-5.97	6.73e-09	4.36e-06	101299578	101301346	LNCPRESS1
chr4	26432055	26436951	1.18	7.26	-6.08	6.74e-09	4.36e-06	26430146	26431174	RBPJ
chr9	16831714	16834588	0.78	6.93	-6.15	6.77e-09	4.36e-06	16583060	16867692	BNC2
chr2	159475475	159479209	-0.16	6.58	-6.75	6.83e-09	4.36e-06	159398843	159453661	BAZ2B
chr5	50698844	50701778	-0.16	6.65	-6.81	7.24e-09	4.59e-06	50667893	50842342	PARP8
chr15	57088089	57092448	1.16	7.15	-5.99	7.29e-09	4.59e-06	57109258	57243553	TCF12
chr4	164881800	164883816	-0.16	6.55	-6.71	7.51e-09	4.7e-06	164877242	164898965	APELA
chr14	55042467	55045658	-0.16	6.75	-6.91	7.59e-09	4.71e-06	55051647	55063025	MAPK1IP1L
chr19	20405684	20407891	1	7.03	-6.03	7.75e-09	4.71e-06	20397334	20409959	ZNF826P
chr1	180395119	180398161	-0.16	6.88	-7.04	7.86e-09	4.71e-06	180286983	180413388	ACBD6
chr9	101389293	101397298	1.63	8.31	-6.69	7.86e-09	4.71e-06	101387633	101398618	MRPL50
chr5	109691786	109696878	0.78	6.92	-6.14	7.89e-09	4.71e-06	109689366	109867178	MAN2A1
chr6	78946712	78950915	-0.16	6.77	-6.93	7.9e-09	4.71e-06	78940546	78982943	PHIP
chr2	1152444	1154881	-0.16	6.62	-6.78	7.91e-09	4.71e-06	1163247	1220057	SNTG2
chr15	28169980	28172533	0.24	6.51	-6.27	8.02e-09	4.72e-06	28152759	28174423	HERC2
chr2	99483717	99487133	-0.16	6.79	-6.95	8.03e-09	4.72e-06	99400475	99489973	REV1
chr22	38358799	38361888	0.53	6.66	-6.13	8.16e-09	4.76e-06	38336337	38344434	TPTEP2-CSNK1E
chr7	26203814	26212609	2.13	8.46	-6.32	8.25e-09	4.78e-06	26206036	26208476	CBX3
chr8	140724849	140728978	1	6.94	-5.94	9e-09	5.15e-06	140700921	140721788	PTK2
chr2	60485024	60487348	-0.16	6.53	-6.69	9.05e-09	5.15e-06	60452649	60484465	BCL11A
chr14	55593744	55599813	1.64	7.5	-5.86	9.07e-09	5.15e-06	55601792	55684579	KTN1
chr18	46224528	46227971	-0.16	6.73	-6.89	9.2e-09	5.18e-06	46174086	46232936	C18orf25
chr18	13023648	13025521	0.3	6.65	-6.35	9.24e-09	5.18e-06	13029787	13124995	CEP192
chr5	25429459	25433030	-0.16	6.86	-7.02	9.43e-09	5.22e-06	25297734	25311370	LINC02211
chr5	146496726	146499997	0.23	6.85	-6.62	9.43e-09	5.22e-06	146499573	146503539	TCERG1
chr4	92461185	92466365	-0.16	6.89	-7.06	9.58e-09	5.27e-06	92304657	93772498	GRID2
chr10	20085694	20089267	-0.16	6.7	-6.87	9.63e-09	5.27e-06	20043320	20280357	PLXDC2
chr2	219566286	219568990	-0.16	6.5	-6.66	9.83e-09	5.34e-06	219569162	219575053	INHA
chr7	2104991	2107944	0.23	6.51	-6.28	9.93e-09	5.34e-06	2014506	2107708	MAD1L1
chr4	15637732	15640345	-0.16	6.54	-6.7	1e-08	5.34e-06	15605006	15644649	FBXL5
chr8	81829961	81833029	0.78	6.68	-5.9	1e-08	5.34e-06	81814645	81823850	SNX16
chr12	14471542	14476377	-0.16	6.99	-7.15	1.01e-08	5.34e-06	14478336	14481906	ATF7IP
chr22	24328870	24333749	-0.16	6.66	-6.82	1.04e-08	5.44e-06	24304396	24321688	SPECC1L-ADORA2A
chr10	86917754	86921366	0.92	6.86	-5.94	1.04e-08	5.44e-06	86943871	86944571	MMRN2
chr13	28441155	28444517	-0.16	6.68	-6.84	1.05e-08	5.44e-06	28385548	28495079	FLT1
chr10	86900864	86903537	-0.16	6.51	-6.67	1.08e-08	5.57e-06	86943871	86944571	MMRN2
chr1	180743506	180746455	-0.16	6.64	-6.8	1.08e-08	5.57e-06	180836652	180874055	XPR1
chr5	115229682	115233668	-0.16	6.49	-6.65	1.1e-08	5.64e-06	115216865	115231784	PGGT1B
chr2	38573818	38578930	0.92	7.02	-6.09	1.11e-08	5.64e-06	38568079	38569836	HNRNPLL
chr4	82891892	82900312	1.75	8.34	-6.59	1.14e-08	5.74e-06	82897793	82900502	THAP9-AS1
chr1	39274460	39276968	-0.16	6.67	-6.83	1.15e-08	5.79e-06	39268527	39357775	MACF1
chr11	14343495	14347879	1.18	7.19	-6.01	1.18e-08	5.89e-06	14279397	14342094	RRAS2
chr8	102255651	102258642	-0.16	6.5	-6.66	1.19e-08	5.91e-06	102253946	102261986	UBR5
chr1	235225502	235229329	-0.16	6.71	-6.87	1.24e-08	6.1e-06	235180139	235234492	ARID4B
chr15	25360501	25363552	0.81	6.7	-5.89	1.25e-08	6.13e-06	25354407	25357575	UBE3A
chr20	21350795	21354887	-0.16	6.62	-6.78	1.26e-08	6.13e-06	21395365	21397526	NKX2-4
chr10	98194645	98198811	-0.16	6.47	-6.63	1.26e-08	6.14e-06	98163287	98244894	R3HCC1L
chr16	70247916	70251888	-0.16	6.44	-6.6	1.3e-08	6.23e-06	70246778	70251940	EXOSC6
chr6	154805851	154807737	0.92	6.75	-5.83	1.31e-08	6.26e-06	154832697	155257723	TIAM2
chr12	813767	816397	0.81	6.67	-5.86	1.34e-08	6.34e-06	829925	861135	WNK1
chr19	43985895	43991383	1.35	7.26	-5.92	1.36e-08	6.36e-06	43984221	43996203	ZNF155
chr16	15123919	15126548	-0.16	6.42	-6.58	1.36e-08	6.36e-06	15110791	15125948	PKD1P6-NPIPP1
chr2	147964531	147969169	-0.16	6.8	-6.96	1.36e-08	6.36e-06	147951448	147972829	ORC4
chr4	114479928	114484118	0.92	6.83	-5.91	1.39e-08	6.47e-06	114598770	114623305	UGT8
chr1	81879845	81882970	0.78	6.8	-6.02	1.4e-08	6.48e-06	81942969	81991368	ADGRL2
chr6	21837607	21839851	0.24	6.38	-6.15	1.42e-08	6.52e-06	21885656	21999239	CASC15
chr11	46098781	46102252	0.78	6.64	-5.86	1.43e-08	6.52e-06	45971348	46092205	PHF21A
chr1	180653080	180655601	-0.16	6.47	-6.64	1.46e-08	6.65e-06	180632032	180886126	XPR1
chr4	84962083	84964502	0.78	6.69	-5.9	1.49e-08	6.73e-06	84965534	85008734	WDFY3-AS2
chr3	143013552	143016461	0.3	6.46	-6.17	1.52e-08	6.83e-06	143016892	143027270	U2SURP
chr5	16792525	16796093	-0.16	6.41	-6.58	1.55e-08	6.94e-06	16704579	16758226	MYO10
chr4	26408070	26410321	-0.16	6.45	-6.61	1.58e-08	7.03e-06	26420570	26424994	RBPJ
chr4	183508371	183512314	-0.16	6.48	-6.64	1.59e-08	7.03e-06	183506082	183510643	ING2
chr12	45779567	45781833	-0.16	6.4	-6.57	1.59e-08	7.03e-06	45729916	45893918	ARID2
chr14	70952931	70956219	-0.16	6.43	-6.59	1.61e-08	7.09e-06	70946882	70969271	PCNX1
chr10	63183909	63185668	-0.16	6.44	-6.61	1.63e-08	7.11e-06	63167221	63176555	JMJD1C
chr15	89853825	89858724	0.23	6.59	-6.37	1.63e-08	7.11e-06	89837618	89852656	AP3S2
chr12	12497896	12503372	1.63	7.79	-6.16	1.67e-08	7.21e-06	12477886	12506187	DUSP16
chr1	193205437	193209882	1	7.11	-6.11	1.68e-08	7.23e-06	193178730	193186613	B3GALT2
chr4	92252081	92254626	-0.16	6.39	-6.55	1.69e-08	7.23e-06	92268767	92277075	LNCPRESS2
chr1	227161794	227165195	-0.16	6.5	-6.67	1.71e-08	7.29e-06	227111984	227112799	CDC42BPA
chr4	139383000	139385879	0.81	6.74	-5.93	1.79e-08	7.59e-06	139384836	139386547	NAA15
chr12	14372701	14374865	-0.16	6.5	-6.66	1.8e-08	7.6e-06	14367373	14424224	ATF7IP
chr1	147578064	147581699	0.81	6.61	-5.8	1.86e-08	7.76e-06	147600196	147611693	BCL9
chr17	8560533	8564738	1.65	7.22	-5.57	1.86e-08	7.76e-06	8546626	8554289	MYH10
chr10	87778662	87783404	1.71	7.31	-5.61	1.91e-08	7.89e-06	87753117	87814882	ATAD1
chr3	149946875	149949433	-0.16	6.34	-6.51	1.91e-08	7.89e-06	149959957	149961374	RNF13
chr6	100802114	100805546	-0.16	6.38	-6.55	1.92e-08	7.89e-06	100848004	100881301	ASCC3
chr11	116965579	116968476	0.78	6.55	-5.76	1.94e-08	7.95e-06	116893845	116957064	SIK3
chr4	53440291	53442520	0.3	6.37	-6.08	1.95e-08	7.95e-06	53442253	53453131	FIP1L1
chr17	5283523	5287470	-0.16	6.35	-6.51	1.98e-08	8.03e-06	5282487	5383223	RABEP1
chr10	52022998	52025075	-0.16	6.39	-6.55	2.02e-08	8.17e-06	52046748	52185074	PRKG1
chr20	38493012	38494936	-0.16	6.36	-6.52	2.05e-08	8.26e-06	38497438	38500003	RALGAPB
chr9	111421390	111424320	1.18	6.99	-5.81	2.12e-08	8.43e-06	111361886	111371788	ECPAS
chr1	164596280	164598508	0.3	6.35	-6.06	2.12e-08	8.43e-06	164590350	164847101	PBX1
chr7	149132231	149134729	-0.16	6.36	-6.52	2.13e-08	8.43e-06	149126416	149182802	ZNF398
chr14	55633747	55636131	-0.16	6.36	-6.53	2.14e-08	8.43e-06	55641749	55661586	KTN1
chr12	832099	836557	1.18	7.08	-5.9	2.15e-08	8.43e-06	829925	861135	WNK1
chr9	74093510	74096798	-0.16	6.49	-6.65	2.15e-08	8.43e-06	74371335	74373048	LOC101927358
chr6	145807000	145809563	-0.16	6.37	-6.53	2.18e-08	8.48e-06	145793502	145814795	FBXO30
chr3	194438595	194441459	1.06	6.67	-5.61	2.19e-08	8.48e-06	194430930	194432022	ATP13A3
chr2	231986366	231994236	1.66	7.15	-5.49	2.19e-08	8.48e-06	232014928	232336630	DIS3L2
chr5	14673628	14682314	1.03	6.86	-5.83	2.22e-08	8.54e-06	14678756	14690151	OTULIN
chr2	69875649	69878466	-0.16	6.4	-6.56	2.29e-08	8.75e-06	69869557	69878990	GMCL1
chr2	209305424	209307551	-0.16	6.38	-6.55	2.31e-08	8.79e-06	209424058	209730518	MAP2
chr13	20064422	20067701	-0.16	6.6	-6.76	2.32e-08	8.81e-06	20066578	20083757	ZMYM2
chr2	175122308	175124782	-0.16	6.3	-6.46	2.38e-08	8.99e-06	175074392	175130205	ATF2
chr6	87218627	87221279	-0.16	6.56	-6.72	2.41e-08	9.05e-06	87213738	87222867	ZNF292
chr2	182990556	182995112	1.18	7.06	-5.87	2.45e-08	9.2e-06	182957141	182964764	NCKAP1
chr1	220020634	220024214	0.53	6.76	-6.23	2.48e-08	9.22e-06	219997176	220007365	EPRS1
chr5	77707403	77712129	-0.16	6.62	-6.78	2.48e-08	9.22e-06	77691241	77708613	TBCA
chr13	93260461	93266960	-0.16	6.3	-6.47	2.61e-08	9.64e-06	93226807	94408020	GPC6
chr1	167307487	167309643	-0.16	6.42	-6.58	2.64e-08	9.71e-06	167329044	167427345	POU2F1
chr6	38056777	38059629	-0.16	6.49	-6.65	2.68e-08	9.82e-06	38061611	38062660	ZFAND3
chr14	35141777	35144886	-0.16	6.42	-6.58	2.7e-08	9.82e-06	35122759	35273485	PRORP
chr8	118032509	118034462	-0.16	6.28	-6.44	2.7e-08	9.82e-06	117822465	118110414	EXT1
chr4	119610127	119616668	1	6.9	-5.9	2.81e-08	1.02e-05	119498541	119627633	PDE5A
chr16	15628200	15631663	-0.16	6.34	-6.5	2.82e-08	1.02e-05	15616785	15623150	MARF1
chr1	236587828	236590838	-0.16	6.26	-6.42	2.85e-08	1.02e-05	236595772	236599620	HEATR1
chr8	53820450	53823834	-0.16	6.34	-6.5	2.87e-08	1.03e-05	53795750	53817503	ATP6V1H
chr10	87910340	87913878	-0.16	6.67	-6.83	2.88e-08	1.03e-05	87925523	87933487	PTEN
chr8	117950378	117954924	1.49	7.28	-5.78	2.92e-08	1.03e-05	117822465	118110414	EXT1
chr22	29915397	29919038	-0.16	6.26	-6.42	3.08e-08	1.09e-05	29883269	29991669	MTMR3
chr6	136484352	136486667	0.53	6.36	-5.83	3.11e-08	1.09e-05	136343782	136466875	MAP7
chr1	39315392	39318332	-0.16	6.52	-6.69	3.13e-08	1.1e-05	39331138	39486987	MACF1
chr17	37548112	37550053	-0.16	6.29	-6.45	3.21e-08	1.12e-05	37536086	37542386	SYNRG
chr2	72712883	72715866	-0.16	6.27	-6.43	3.22e-08	1.12e-05	72496454	72826005	EXOC6B
chr17	67926027	67928458	-0.16	6.3	-6.46	3.28e-08	1.14e-05	67920100	67940545	BPTF
chr1	51509804	51512164	0.55	6.48	-5.93	3.31e-08	1.14e-05	51461123	51519227	EPS15
chr6	7394120	7396141	0.55	6.3	-5.75	3.35e-08	1.15e-05	7396752	7418037	RIOK1
chr15	29735377	29737376	-0.16	6.22	-6.38	3.35e-08	1.15e-05	29732134	29732933	TJP1
chr12	65196008	65199029	-0.16	6.36	-6.52	3.42e-08	1.16e-05	65169583	65248355	LEMD3
chr1	66932562	66939924	0.92	7.16	-6.24	3.44e-08	1.16e-05	66932652	66959750	MIER1
chr1	170533125	170536019	-0.16	6.41	-6.57	3.46e-08	1.17e-05	170536275	170539659	GORAB
chr11	43376046	43379504	1.53	7.3	-5.77	3.53e-08	1.18e-05	43379258	43391788	TTC17
chr17	5355083	5359399	1	6.74	-5.74	3.54e-08	1.18e-05	5354401	5361629	RABEP1
chr8	129892689	129895321	0.78	6.55	-5.77	3.56e-08	1.19e-05	129849292	129903351	FAM49B
chr6	122456848	122459480	1.35	7.01	-5.66	3.62e-08	1.2e-05	122443351	122471807	SERINC1
chr18	62811814	62814231	-0.16	6.46	-6.62	3.66e-08	1.21e-05	62832160	62889665	PHLPP1
chr20	25431618	25433803	-0.16	6.43	-6.59	3.66e-08	1.21e-05	25443024	25452628	GINS1
chr10	59849442	59851178	-0.16	6.21	-6.38	3.7e-08	1.21e-05	59806444	59812728	CCDC6
chr17	47163011	47165030	0.55	6.28	-5.73	3.74e-08	1.22e-05	47142428	47169977	CDC27
chr17	14144904	14148752	-0.16	6.32	-6.48	3.74e-08	1.22e-05	14069604	14207585	COX10
chr6	57444176	57447648	0.53	6.32	-5.79	3.78e-08	1.23e-05	57390132	57390212	MIR548U
chr4	78785269	78789985	-0.16	6.2	-6.36	3.8e-08	1.23e-05	78776378	78912185	BMP2K
chr5	147952725	147955136	-0.16	6.23	-6.4	3.83e-08	1.23e-05	147901308	147906538	C5orf46
chr3	61892095	61894304	-0.16	6.34	-6.5	3.87e-08	1.24e-05	62217583	62293551	PTPRG
chr1	33898024	33899908	0.23	6.24	-6.02	3.87e-08	1.24e-05	33875466	33885423	CSMD2-AS1
chr5	147504645	147507891	-0.16	6.56	-6.72	3.9e-08	1.24e-05	147472632	147509535	DPYSL3
chr5	159279366	159281666	0.53	6.25	-5.72	3.96e-08	1.26e-05	159274542	159286036	UBLCP1
chr2	229907720	229910057	1.35	7.04	-5.69	4.01e-08	1.27e-05	229859226	229921358	TRIP12
chr4	159005	162379	-0.16	6.72	-6.89	4.08e-08	1.28e-05	124538	162701	ZNF718
chr7	144195810	144205547	-0.16	6.19	-6.35	4.11e-08	1.29e-05	144195888	144232295	OR2A1-AS1
chr7	122092488	122095293	-0.16	6.35	-6.51	4.16e-08	1.3e-05	122075647	122086153	AASS
chr14	32134784	32139063	1.35	6.96	-5.62	4.22e-08	1.31e-05	32094038	32154827	ARHGAP5
chr2	135965807	135969326	-0.16	6.31	-6.47	4.22e-08	1.31e-05	135943386	135980551	DARS1
chr12	12125638	12128293	-0.16	6.3	-6.46	4.26e-08	1.32e-05	12121047	12131830	LRP6
chr15	63791343	63793606	-0.16	6.25	-6.41	4.28e-08	1.32e-05	63775564	63833885	HERC1
chr4	114628976	114631574	0.55	6.25	-5.7	4.29e-08	1.32e-05	114622367	114676596	UGT8
chr21	37493049	37495573	-0.16	6.32	-6.48	4.45e-08	1.36e-05	37488785	37512559	DYRK1A
chr2	71424391	71426058	-0.16	6.2	-6.36	4.47e-08	1.36e-05	71426846	71435058	ZNF638
chr5	147637720	147642394	0.92	6.61	-5.69	4.57e-08	1.38e-05	147632679	147644199	JAKMIP2
chr8	67247131	67248828	-0.16	6.25	-6.41	4.57e-08	1.38e-05	67199929	67238754	ARFGEF1
chr1	246908328	246910884	-0.16	6.46	-6.63	4.63e-08	1.39e-05	246839098	246899480	AHCTF1
chr8	95026681	95029600	1.3	6.66	-5.35	4.66e-08	1.39e-05	95025068	95076168	NDUFAF6
chr10	91986425	91988862	-0.16	6.18	-6.34	4.67e-08	1.39e-05	91980520	91982415	BTAF1
chr11	74608709	74610956	-0.16	6.15	-6.31	4.68e-08	1.39e-05	74604563	74618675	POLD3
chr7	109579437	109582472	0.78	6.59	-5.81	4.71e-08	1.4e-05	109959218	109960184	EIF3IP1
chr10	110930953	110932864	0.64	6.29	-5.65	4.85e-08	1.43e-05	110936622	110937233	RPL13AP6
chr15	39882204	39884776	-0.16	6.4	-6.56	4.97e-08	1.46e-05	39801824	39894527	GPR176
chr10	91828879	91831004	0.53	6.2	-5.67	5.01e-08	1.47e-05	91798426	91865475	TNKS2
chr10	103106650	103111257	1.18	7.04	-5.86	5.02e-08	1.47e-05	103097972	103106650	NT5C2
chr16	75375547	75379473	1.61	6.8	-5.19	5.03e-08	1.47e-05	75293906	75363035	CFDP1
chr18	12859067	12862141	1.71	6.94	-5.23	5.17e-08	1.5e-05	12836824	12862473	PTPN2
chr12	70313479	70318814	-0.16	6.96	-7.12	5.26e-08	1.52e-05	70319024	70335833	CNOT2
chr2	174215772	174218486	0.78	6.32	-5.54	5.31e-08	1.53e-05	174082010	174217946	OLA1
chr9	125775727	125778757	0.78	6.55	-5.77	5.33e-08	1.53e-05	125750474	125966412	PBX3
chr2	195661410	195664042	-0.16	6.13	-6.29	5.33e-08	1.53e-05	195657449	195680433	SLC39A10
chr7	130569782	130572244	-0.16	6.19	-6.35	5.4e-08	1.54e-05	130506524	130564511	COPG2
chr6	114432835	114435007	-0.16	6.19	-6.35	5.45e-08	1.55e-05	114055586	114343045	HS3ST5
chr8	86378828	86381207	-0.16	6.12	-6.28	5.58e-08	1.58e-05	86380817	86448497	WWP1
chr15	49019868	49021669	-0.16	6.12	-6.28	5.63e-08	1.59e-05	49016917	49019647	SECISBP2L
chr1	180779449	180781979	-0.16	6.25	-6.41	5.67e-08	1.6e-05	180836652	180874055	XPR1
chr10	5701013	5704256	0.78	6.31	-5.53	5.7e-08	1.6e-05	5699493	5714207	TASOR2
chr2	207585921	207587930	-0.16	6.12	-6.28	5.73e-08	1.61e-05	207597165	207599182	CREB1
chr7	639188	641307	0.24	6.12	-5.88	5.75e-08	1.61e-05	603185	608482	LOC101926963
chr1	184459230	184462067	0.78	6.59	-5.81	5.78e-08	1.61e-05	184387271	184621974	C1orf21
chr13	19728135	19729589	0.23	6.21	-5.99	5.78e-08	1.61e-05	19675429	19730316	PSPC1
chr5	75486861	75488212	-0.16	6.2	-6.36	5.82e-08	1.61e-05	75371121	75506004	CERT1
chr2	99317717	99319516	-0.16	6.11	-6.27	5.94e-08	1.64e-05	99284257	99304742	LYG1
chr4	94459605	94471684	0.55	6.75	-6.2	5.96e-08	1.64e-05	94455267	94549986	PDLIM5
chr18	55308812	55314821	-0.16	6.19	-6.35	6.03e-08	1.65e-05	55279566	55320881	TCF4
chr5	50747795	50749564	-0.16	6.14	-6.3	6.15e-08	1.68e-05	50667893	50842342	PARP8
chr2	209316256	209318729	-0.16	6.21	-6.37	6.24e-08	1.7e-05	209424058	209730518	MAP2
chr4	53451879	53454423	-0.16	6.15	-6.31	6.47e-08	1.75e-05	53458551	53459402	FIP1L1
chr14	68881781	68884454	1.18	6.71	-5.53	6.57e-08	1.75e-05	68874786	68882567	ACTN1
chr5	88250188	88252265	-0.16	6.2	-6.36	6.59e-08	1.75e-05	88228441	88251037	TMEM161B
chr3	150428811	150430851	0.53	6.23	-5.7	6.62e-08	1.75e-05	150423039	150423451	TSC22D2
chr17	16064786	16067287	-0.16	6.19	-6.35	6.62e-08	1.75e-05	16061867	16065885	NCOR1
chr7	112469609	112475351	1.86	7.87	-6.01	6.62e-08	1.75e-05	112468086	112481017	IFRD1
chr3	172244826	172247085	-0.16	6.17	-6.33	6.62e-08	1.75e-05	172306936	172310927	FNDC3B
chr12	1118899	1120938	-0.16	6.21	-6.37	6.63e-08	1.75e-05	1115624	1141740	ERC1
chr14	53109239	53111784	0.3	6.11	-5.81	6.64e-08	1.75e-05	53091911	53093851	DDHD1
chr2	53937393	53940436	-0.16	6.41	-6.57	6.66e-08	1.75e-05	53932056	53933169	PSME4
chr1	39129951	39132381	-0.16	6.14	-6.3	6.76e-08	1.77e-05	39105429	39254648	MACF1
chr8	117933405	117935869	-0.16	6.08	-6.24	6.78e-08	1.77e-05	117822465	118110414	EXT1
chr22	40302344	40304456	-0.16	6.13	-6.29	6.8e-08	1.77e-05	40300856	40301495	TNRC6B
chr1	63777584	63779310	-0.16	6.22	-6.38	6.91e-08	1.8e-05	63775290	64140364	ROR1
chr6	154796387	154798123	-0.16	6.11	-6.27	6.96e-08	1.8e-05	154832697	155257723	TIAM2
chr2	11314499	11317209	-0.16	6.11	-6.27	6.96e-08	1.8e-05	11221327	11287737	ROCK2
chr10	63517454	63519923	0.53	6.21	-5.68	6.97e-08	1.8e-05	63521401	63625128	REEP3
chr3	154258326	154261606	0.92	6.55	-5.62	7.04e-08	1.81e-05	154276029	154277835	DHX36
chr15	57174840	57178624	1.35	6.94	-5.6	7.23e-08	1.85e-05	57214079	57243515	TCF12
chr1	212888433	212903763	2.68	9.01	-6.33	7.31e-08	1.87e-05	212883409	212895394	FLVCR1
chr13	28194675	28197762	0.24	6.4	-6.16	7.32e-08	1.87e-05	28239557	28256539	PAN3
chr8	80116458	80119574	-0.16	6.07	-6.23	7.37e-08	1.87e-05	80034872	80080831	TPD52
chr5	129469780	129473344	-0.16	6.24	-6.41	7.43e-08	1.88e-05	129461676	129528543	ADAMTS19
chr10	96532636	96534899	0.64	6.24	-5.6	7.5e-08	1.89e-05	96522277	96528173	TM9SF3
chr10	96524476	96526897	0.23	6.35	-6.12	7.59e-08	1.91e-05	96522277	96528173	TM9SF3
chr5	14261125	14263845	-0.16	6.25	-6.41	7.62e-08	1.91e-05	14290977	14297513	TRIO
chr15	81839002	81841020	-0.16	6.05	-6.21	7.79e-08	1.94e-05	82041778	82046018	MEX3B
chr3	154298594	154301118	0.8	6.25	-5.45	7.81e-08	1.95e-05	154284653	154295327	DHX36
chr7	7242348	7244053	-0.16	6.18	-6.34	7.87e-08	1.95e-05	7234320	7238964	C1GALT1
chr2	224519997	224521783	-0.16	6.06	-6.23	7.89e-08	1.95e-05	224505749	224511411	CUL3
chr4	145879572	145884374	1.53	7.08	-5.55	8.08e-08	1.99e-05	145757664	145885769	ZNF827
chr1	235217069	235219069	-0.16	6.1	-6.26	8.23e-08	2.02e-05	235177787	235213916	ARID4B
chr3	65893768	65901118	1.91	7.83	-5.92	8.34e-08	2.04e-05	65893816	65925297	MAGI1-AS1
chr17	31096337	31099911	-0.16	6.03	-6.2	8.45e-08	2.06e-05	31095208	31374287	NF1
chr4	84957391	84959535	0.53	6.23	-5.7	8.46e-08	2.06e-05	84965534	85008734	WDFY3-AS2
chr10	91826143	91828446	-0.16	6.1	-6.26	8.54e-08	2.07e-05	91798426	91865475	TNKS2
chr1	90916191	90918388	-0.16	6.02	-6.19	8.54e-08	2.07e-05	90916791	90918391	ZNF644
chr3	133202816	133204752	0.53	6.11	-5.58	8.68e-08	2.1e-05	133192775	133380171	TMEM108
chr1	172551194	172553395	-0.16	6.06	-6.22	8.71e-08	2.1e-05	172553330	172570796	SUCO
chr2	69350628	69354344	-0.16	6.22	-6.38	8.76e-08	2.1e-05	69350098	69363592	GFPT1
chr18	4321400	4322807	0.3	6.04	-5.75	8.76e-08	2.1e-05	4264633	4295405	DLGAP1-AS5
chr3	177047630	177050600	-0.16	6.29	-6.45	8.92e-08	2.12e-05	177020592	177051535	TBL1XR1
chr2	201635443	201637698	-0.16	6.08	-6.24	8.94e-08	2.12e-05	201636170	201639031	TMEM237
chr1	70191870	70194082	-0.16	6.04	-6.2	9.06e-08	2.14e-05	70144805	70205579	LRRC40
chr4	86596707	86599971	1.18	6.64	-5.45	9.15e-08	2.16e-05	86595693	86689061	PTPN13
chr18	79092988	79096680	1.16	6.61	-5.46	9.23e-08	2.17e-05	79096513	79378141	ATP9B
chr4	151118770	151121814	-0.16	6.08	-6.24	9.35e-08	2.19e-05	151103827	151103891	SNORD73A
chr11	74750893	74753265	-0.16	6.15	-6.31	9.55e-08	2.23e-05	74748849	74842413	RNF169
chr13	29807747	29809847	-0.16	6.05	-6.22	9.58e-08	2.23e-05	29764371	29850617	UBL3
chr11	86320335	86324096	1.18	6.62	-5.43	9.77e-08	2.26e-05	86306333	86345662	HIKESHI
chr14	50824367	50830066	1.38	6.83	-5.45	9.77e-08	2.26e-05	50725827	50830479	NIN
chr5	133956165	133958442	-0.16	6.04	-6.2	9.86e-08	2.26e-05	133955510	133968625	C5orf15
chr13	44970112	44973533	1.03	6.4	-5.37	9.88e-08	2.26e-05	44939249	44989471	NUFIP1
chr12	45805794	45807152	-0.16	6.09	-6.26	9.88e-08	2.26e-05	45836761	45908040	ARID2
chr17	21158686	21161223	1.09	6.25	-5.16	9.88e-08	2.26e-05	21166154	21172443	DHRS7B
chr19	46896840	46898671	-0.16	6.08	-6.24	9.91e-08	2.26e-05	46918676	47004307	ARHGAP35
chr14	54573106	54574635	-0.16	6.01	-6.17	9.91e-08	2.26e-05	54567632	54703867	SAMD4A
chr6	156784776	156791379	2.42	7.86	-5.43	9.98e-08	2.27e-05	156779678	156779731	MIR4466
chr5	122002536	122005679	-0.16	6.03	-6.19	9.99e-08	2.27e-05	122020530	122075570	SRFBP1
chr8	122919749	122921589	-0.16	6.03	-6.19	1e-07	2.27e-05	122863385	122952009	ZHX2
chr5	14236832	14240568	-0.16	6.09	-6.26	1.01e-07	2.28e-05	14290977	14297513	TRIO
chr4	92467482	92485184	2.61	9.63	-7.01	1.03e-07	2.31e-05	92304657	93772498	GRID2
chr6	12072536	12074329	0.53	6.08	-5.55	1.03e-07	2.31e-05	12125746	12164575	HIVEP1
chr15	79894109	79895555	-0.16	6.05	-6.22	1.04e-07	2.32e-05	79889092	79896997	MTHFS
chr4	152526716	152535886	1.75	7.71	-5.95	1.05e-07	2.35e-05	152411160	152535191	FBXW7
chr7	24402788	24404693	-0.16	6.05	-6.21	1.07e-07	2.39e-05	24285107	24291824	NPY
chr7	129645071	129649002	1.35	6.81	-5.46	1.08e-07	2.4e-05	129630078	129757080	NRF1
chr11	94658549	94661173	-0.16	6.12	-6.28	1.08e-07	2.4e-05	94617789	94621113	PIWIL4
chr5	77695015	77698873	-0.16	6.46	-6.62	1.09e-07	2.4e-05	77691259	77694277	TBCA
chr1	232149853	232153169	-0.16	6.22	-6.39	1.12e-07	2.48e-05	231925834	231945233	DISC1-IT1
chr11	110272423	110276433	-0.16	6.66	-6.82	1.13e-07	2.48e-05	110258114	110264824	RDX
chr1	100271976	100275119	-0.16	6.26	-6.42	1.13e-07	2.48e-05	100266289	100266929	RTCA
chr15	57041202	57043526	-0.16	6.03	-6.19	1.14e-07	2.5e-05	57063748	57092023	TCF12
chr11	76355917	76357375	0.24	5.97	-5.73	1.16e-07	2.53e-05	76349956	76359573	THAP12
chr22	33472220	33474536	-0.16	6.02	-6.18	1.16e-07	2.53e-05	33436582	33436669	MIR4764
chr2	43976989	43978410	-0.16	6.1	-6.26	1.16e-07	2.53e-05	43948426	43963804	LRPPRC
chr12	21636867	21639641	0.78	6.49	-5.71	1.17e-07	2.54e-05	21635342	21637374	LDHB
chr13	93391360	93396601	-0.16	6.08	-6.24	1.18e-07	2.55e-05	93226807	94408020	GPC6
chr11	77465222	77467453	-0.16	6	-6.16	1.2e-07	2.59e-05	77358841	77473495	PAK1
chr18	4332995	4337043	0.81	6.31	-5.5	1.2e-07	2.59e-05	4264633	4295405	DLGAP1-AS5
chr12	71783667	71785985	0.53	6.07	-5.54	1.21e-07	2.61e-05	71782414	71785689	RAB21
chr2	63553898	63556131	-0.16	6.05	-6.21	1.22e-07	2.61e-05	63437457	63588266	WDPCP
chr6	93833514	93835334	0.53	6.03	-5.5	1.23e-07	2.62e-05	93720163	93745615	TSG1
chr5	106952665	106956811	-0.16	6.43	-6.59	1.23e-07	2.63e-05	106815205	106980869	LINC01950
chr7	135420985	135423452	-0.16	6.03	-6.19	1.24e-07	2.64e-05	135361798	135415214	CNOT4
chr4	55509574	55511055	-0.16	6.01	-6.17	1.25e-07	2.64e-05	55427903	55510027	CLOCK
chr12	27783240	27786134	0.53	6.09	-5.56	1.26e-07	2.66e-05	27787635	27791926	KLHL42
chr6	158287561	158290299	0.53	6.1	-5.57	1.26e-07	2.66e-05	158312465	158511828	TULP4
chr2	111830069	111833287	-0.16	6.39	-6.55	1.27e-07	2.68e-05	111802533	111821756	ANAPC1
chr16	31888413	31890862	-0.16	5.98	-6.14	1.3e-07	2.73e-05	31874066	31914620	ZNF267
chr10	11997718	12001278	-0.16	6.25	-6.41	1.31e-07	2.74e-05	11920022	12035897	UPF2
chr4	152465043	152468602	-0.16	6.03	-6.19	1.31e-07	2.74e-05	152489327	152489416	MIR3140
chr12	112365950	112367748	-0.16	5.93	-6.09	1.34e-07	2.79e-05	112160188	112382092	HECTD4
chr2	53889978	53892413	-0.16	6.01	-6.17	1.36e-07	2.83e-05	53887417	53888320	PSME4
chr6	156988320	156991589	1.75	7.32	-5.57	1.37e-07	2.85e-05	157022286	157208694	ARID1B
chr15	24993646	24995308	-0.16	6.08	-6.24	1.38e-07	2.85e-05	25000305	25020825	SNHG14
chr2	169736546	169738406	0.81	6.16	-5.35	1.42e-07	2.91e-05	169735552	169773385	KLHL23
chr13	36327747	36333176	1.75	7.3	-5.55	1.42e-07	2.91e-05	36304457	36326623	SPART
chr5	83062937	83077214	2.4	8.98	-6.58	1.42e-07	2.91e-05	83064204	83064337	SCARNA18
chr1	90011756	90014146	-0.16	6.07	-6.23	1.42e-07	2.91e-05	89995137	90035531	ZNF326
chr10	35468789	35470784	-0.16	5.96	-6.12	1.43e-07	2.93e-05	35434111	35501661	CCNY
chr7	74717164	74719104	-0.16	6.12	-6.28	1.44e-07	2.93e-05	74716612	74730289	GTF2I
chr11	10537699	10539396	-0.16	5.95	-6.12	1.45e-07	2.95e-05	10519034	10540906	RNF141
chr12	32592918	32600412	2.07	7.99	-5.92	1.46e-07	2.95e-05	32582379	32644751	FGD4
chr7	128979613	128981729	-0.16	6.06	-6.22	1.46e-07	2.95e-05	128940838	128949388	IRF5
chr12	76049419	76052350	-0.16	6.12	-6.28	1.47e-07	2.98e-05	76047634	76049721	NAP1L1
chr1	81904425	81907317	-0.16	6.04	-6.2	1.48e-07	2.99e-05	81942969	81991368	ADGRL2
chr11	77699068	77701637	-0.16	6.03	-6.19	1.49e-07	2.99e-05	77690966	77700761	RSF1
chr13	27160951	27162442	0.78	6.11	-5.33	1.53e-07	3.08e-05	27162855	27169135	USP12-AS1
chr7	121875862	121877779	-0.16	5.91	-6.07	1.54e-07	3.08e-05	121873481	122061979	PTPRZ1
chr7	7221719	7223575	-0.16	5.93	-6.09	1.54e-07	3.08e-05	7234258	7248651	C1GALT1
chr2	189456080	189459434	1.49	6.84	-5.34	1.56e-07	3.11e-05	189462484	189464211	WDR75
chr3	41200082	41202677	-0.16	6.11	-6.27	1.56e-07	3.11e-05	41200110	41239904	CTNNB1
chr4	75728359	75729848	-0.16	5.93	-6.09	1.58e-07	3.14e-05	75724598	75814286	USO1
chr13	100451114	100453372	-0.16	6.08	-6.24	1.6e-07	3.16e-05	100464440	100480285	PCCA-AS1
chr14	69218497	69221826	-0.16	6.07	-6.23	1.62e-07	3.19e-05	69224130	69230585	EXD2
chr18	74497557	74499197	0.79	6.03	-5.24	1.62e-07	3.19e-05	74499342	74508920	CNDP2
chr1	233667571	233669098	0.24	5.91	-5.67	1.63e-07	3.19e-05	233655695	233666686	KCNK1
chr14	27642385	27645525	-0.16	6.25	-6.41	1.63e-07	3.19e-05	27634125	27636669	LINC00645
chr11	68745682	68748267	-0.16	5.94	-6.1	1.64e-07	3.19e-05	68744873	68747366	TESMIN
chr7	92570543	92573309	1.18	6.52	-5.34	1.64e-07	3.19e-05	92566050	92575854	FAM133B
chr1	193225143	193227435	1.35	6.81	-5.46	1.64e-07	3.19e-05	193233026	193251168	CDC73
chr4	55530388	55537862	2.49	7.97	-5.48	1.65e-07	3.19e-05	55434823	55545932	CLOCK
chr11	43382790	43385076	1	6.42	-5.43	1.65e-07	3.19e-05	43379258	43391788	TTC17
chr1	90975153	90976787	-0.16	6.08	-6.24	1.67e-07	3.22e-05	90972744	90982370	ZNF644
chr5	75489342	75490850	-0.16	5.92	-6.08	1.73e-07	3.34e-05	75371121	75506004	CERT1
chr9	100491459	100493577	-0.16	5.91	-6.07	1.78e-07	3.43e-05	100473149	100577636	TMEFF1
chr5	147972330	147975794	-0.16	5.95	-6.11	1.79e-07	3.43e-05	148025683	148072201	SPINK5
chr3	65673517	65676184	-0.16	5.97	-6.13	1.79e-07	3.43e-05	65354231	65622090	MAGI1
chr14	71042144	71045835	1.49	6.89	-5.4	1.8e-07	3.43e-05	71047960	71073759	PCNX1
chr1	90019260	90021359	-0.16	5.93	-6.09	1.8e-07	3.44e-05	89995137	90035531	ZNF326
chr2	229926917	229928625	-0.16	5.9	-6.06	1.81e-07	3.44e-05	229859211	229923239	TRIP12
chr9	98067158	98069637	0.3	6.02	-5.72	1.82e-07	3.46e-05	98074643	98083075	NANS
chr10	98188222	98189434	-0.16	5.88	-6.04	1.86e-07	3.52e-05	98163287	98244894	R3HCC1L
chr1	178248784	178251208	-0.16	5.95	-6.11	1.9e-07	3.58e-05	178341471	178484147	RASAL2
chr1	155373094	155375597	-0.16	5.91	-6.07	1.9e-07	3.58e-05	155370147	155370868	ASH1L
chr15	58782649	58784921	-0.16	5.91	-6.07	1.91e-07	3.58e-05	58796077	58831819	MINDY2
chr2	241385421	241387680	-0.16	5.88	-6.04	1.91e-07	3.58e-05	241386743	241405403	FARP2
chr11	76139668	76142361	-0.16	5.94	-6.1	1.91e-07	3.58e-05	76115900	76141660	UVRAG
chr12	65169781	65171349	-0.16	5.89	-6.05	1.92e-07	3.58e-05	65169583	65248355	LEMD3
chr9	614854	616276	-0.16	5.92	-6.08	1.94e-07	3.62e-05	547318	549531	KANK1
chr15	59332496	59334154	-0.16	5.89	-6.06	1.96e-07	3.64e-05	59227483	59372527	MYO1E
chr10	96933451	96938279	2.43	7.52	-5.09	2e-07	3.71e-05	96949223	96958515	LCOR
chr5	134789727	134792241	-0.16	5.94	-6.1	2e-07	3.71e-05	134790153	134829932	DDX46
chr14	70972327	70974725	-0.16	6.25	-6.41	2.04e-07	3.77e-05	70978378	71009868	PCNX1
chr5	32375545	32377156	-0.16	5.89	-6.05	2.1e-07	3.87e-05	32354351	32380424	ZFR
chr1	223026461	223029700	-0.16	5.84	-6	2.1e-07	3.87e-05	222928441	222943550	DISP1
chr2	171398402	171403464	-0.16	5.91	-6.07	2.12e-07	3.89e-05	171325891	171392185	METTL8
chr7	141555077	141556646	-0.16	5.85	-6.01	2.14e-07	3.93e-05	141555439	141615880	AGK
chr12	30711588	30714459	-0.16	6.15	-6.31	2.15e-07	3.94e-05	30716290	30728778	CAPRIN2
chr17	2394782	2396387	0.24	5.85	-5.61	2.16e-07	3.94e-05	2395330	2396853	MNT
chr2	171404228	171409924	0.78	6.33	-5.55	2.16e-07	3.94e-05	171325891	171392185	METTL8
chr6	143507345	143510209	1.53	6.84	-5.31	2.18e-07	3.97e-05	143501945	143511690	FUCA2
chr13	21581076	21584375	-0.16	6.04	-6.2	2.19e-07	3.98e-05	21510027	21603711	MICU2
chr18	55329081	55331910	-0.16	5.97	-6.13	2.2e-07	3.98e-05	55234606	55322345	TCF4
chr1	20765655	20768084	1.22	6.54	-5.32	2.22e-07	4.01e-05	20742682	20775005	HP1BP3
chr3	111091180	111092387	-0.16	5.99	-6.15	2.23e-07	4.02e-05	111074204	111118703	NECTIN3
chr7	38857763	38860481	-0.16	5.85	-6.01	2.25e-07	4.05e-05	38795492	38831346	VPS41
chr2	99397081	99399510	1	6.24	-5.25	2.26e-07	4.06e-05	99397047	99399774	EIF5B
chr10	19878533	19880333	-0.16	5.92	-6.08	2.29e-07	4.1e-05	19816432	20289856	PLXDC2
chr1	156979445	156981804	0.81	6.12	-5.31	2.32e-07	4.15e-05	156967911	156971825	ARHGEF11
chr1	165682168	165683486	0.23	5.83	-5.61	2.33e-07	4.16e-05	165668674	165680635	ALDH9A1
chr4	1965253	1966711	0.64	6.04	-5.39	2.35e-07	4.19e-05	1974636	1974760	SCARNA22
chr4	164893042	164898480	2.16	8.13	-5.97	2.37e-07	4.22e-05	164877242	164898965	APELA
chr4	92958322	92960576	-0.16	5.82	-5.98	2.38e-07	4.22e-05	93084986	93774553	GRID2
chr1	110399790	110402594	-0.16	5.93	-6.09	2.42e-07	4.29e-05	110401257	110406425	LAMTOR5
chr13	91347771	91349325	-0.16	5.92	-6.08	2.44e-07	4.31e-05	91347820	91352402	MIR17HG
chr5	127526676	127532687	2.07	7.46	-5.39	2.44e-07	4.31e-05	127517946	127524108	PRRC1
chr7	20080402	20082578	0.78	6.08	-5.3	2.45e-07	4.31e-05	19931071	20125162	LOC101927668
chr21	25760104	25761683	-0.16	5.86	-6.02	2.48e-07	4.35e-05	25724480	25735673	ATP5PF
chr9	26886216	26892155	2.44	7.84	-5.4	2.52e-07	4.4e-05	26869926	26887478	CAAP1
chr6	56713146	56715411	-0.16	5.89	-6.05	2.52e-07	4.4e-05	56638936	56693303	DST
chr9	123045207	123047098	1.2	6.18	-4.98	2.52e-07	4.4e-05	123033685	123034684	GPR21
chr6	34322083	34323465	-0.16	5.8	-5.96	2.61e-07	4.54e-05	34279679	34392669	NUDT3
chr20	50855422	50858593	-0.16	5.81	-5.97	2.61e-07	4.54e-05	50888916	50905558	ADNP
chr12	112325795	112327988	-0.16	5.98	-6.14	2.62e-07	4.55e-05	112249557	112273793	HECTD4
chr15	44516770	44519026	1	6.2	-5.21	2.63e-07	4.55e-05	44519224	44524436	CTDSPL2
chr8	39014953	39018030	-0.16	5.93	-6.1	2.66e-07	4.6e-05	39017036	39021713	ADAM9
chr12	76456407	76458679	-0.16	5.91	-6.07	2.67e-07	4.61e-05	76397856	76486108	OSBPL8
chr11	123130003	123132448	-0.16	6.09	-6.25	2.69e-07	4.64e-05	123083082	123097966	CLMP
chr8	103430520	103432677	-0.16	5.82	-5.98	2.72e-07	4.67e-05	103415412	103443450	DCAF13
chr2	42435760	42437724	-0.16	5.95	-6.11	2.72e-07	4.67e-05	42350941	42388507	COX7A2L
chr3	197177487	197182021	1.75	7.29	-5.53	2.78e-07	4.75e-05	197116038	197183634	DLG1
chr3	169983558	169987461	1.53	6.96	-5.42	2.78e-07	4.75e-05	169985129	169992721	SEC62
chr1	117065241	117067294	-0.16	5.91	-6.07	2.85e-07	4.85e-05	117060362	117075444	TTF2
chr5	112747730	112749277	-0.16	5.83	-5.99	2.87e-07	4.88e-05	112738332	112839508	APC
chr2	63599843	63602421	-0.16	6.03	-6.19	2.87e-07	4.88e-05	63597548	63600052	MDH1
chr2	239240703	239242435	0.23	5.91	-5.68	2.89e-07	4.9e-05	239186488	239236669	HDAC4
chr5	40795057	40796782	-0.16	5.94	-6.1	2.9e-07	4.91e-05	40764937	40798148	PRKAA1
chr1	86880207	86886398	1.75	7.23	-5.48	3.1e-07	5.22e-05	86863517	86903352	SELENOF
chr17	67497896	67500021	0.55	6.1	-5.55	3.11e-07	5.23e-05	67471489	67471585	MIR548D2
chr7	93667412	93669294	-0.16	5.95	-6.11	3.13e-07	5.24e-05	93716928	93717005	MIR4652
chr18	51057582	51059340	1.3	6.37	-5.06	3.15e-07	5.27e-05	51058353	51079143	SMAD4
chrX	41126754	41128063	-0.16	5.77	-5.93	3.17e-07	5.28e-05	41167145	41168242	USP9X
chr1	246878057	246887509	2.29	8.32	-6.03	3.24e-07	5.38e-05	246849871	246877068	AHCTF1
chr5	98876330	98879000	-0.16	5.8	-5.96	3.25e-07	5.39e-05	98855204	98872557	CHD1
chr4	143195709	143197337	-0.16	5.84	-6	3.25e-07	5.39e-05	143185694	143223830	USP38
chr11	9487080	9497324	1.75	7.17	-5.42	3.26e-07	5.39e-05	9512497	9525479	ZNF143
chr8	70384781	70386491	-0.16	5.76	-5.92	3.29e-07	5.42e-05	70112070	70402079	NCOA2
chr10	95261565	95263588	-0.16	5.76	-5.92	3.31e-07	5.44e-05	95263876	95273406	PDLIM1
chr6	166975502	166977623	-0.16	5.82	-5.98	3.34e-07	5.48e-05	166933375	166957191	RNASET2
chr14	50318981	50320969	0.23	5.79	-5.57	3.35e-07	5.48e-05	50319234	50335558	DMAC2L
chr6	135007776	135010199	1	6.16	-5.16	3.35e-07	5.48e-05	134987654	135027156	HBS1L
chr9	122297709	122299304	-0.16	5.79	-5.95	3.36e-07	5.48e-05	122270864	122323461	MRRF
chr10	73577872	73579261	-0.16	5.85	-6.01	3.39e-07	5.53e-05	73518722	73576337	USP54
chr5	134785826	134789167	-0.16	5.96	-6.12	3.44e-07	5.59e-05	134790153	134829932	DDX46
chr4	48645195	48648756	1.49	6.79	-5.29	3.44e-07	5.59e-05	48617604	48653917	FRYL
chr12	1760805	1762832	-0.16	5.83	-5.99	3.47e-07	5.63e-05	1760729	1777915	ADIPOR2
chr17	60224261	60225450	-0.16	5.74	-5.9	3.48e-07	5.64e-05	60213581	60226063	USP32
chr6	107902932	107907972	1.75	7.08	-5.32	3.51e-07	5.66e-05	107893580	107902900	SEC63
chr7	156731515	156733547	-0.16	5.74	-5.9	3.52e-07	5.68e-05	156688114	156726103	LMBR1
chr6	157874042	157886194	2.16	7.96	-5.8	3.55e-07	5.71e-05	157823246	157945077	SNX9
chr6	113860843	113863141	-0.16	6.21	-6.37	3.58e-07	5.75e-05	113857345	113863475	MARCKS
chr2	177438159	177440377	-0.16	5.8	-5.96	3.61e-07	5.78e-05	177436984	177441469	AGPS
chr9	77945523	77949003	1.35	6.78	-5.44	3.62e-07	5.79e-05	77797528	78030604	GNAQ
chr7	32538095	32540987	1.18	6.47	-5.29	3.62e-07	5.79e-05	32543255	32588711	AVL9
chr7	24633566	24636358	1.18	6.32	-5.14	3.63e-07	5.79e-05	24623668	24624070	MPP6
chr6	63692702	63694287	-0.16	5.92	-6.09	3.66e-07	5.82e-05	63702293	63706154	PHF3
chr10	11512425	11514675	1.04	6.08	-5.04	3.66e-07	5.82e-05	11460510	11532275	USP6NL
chr1	223031524	223033836	-0.16	5.88	-6.04	3.67e-07	5.82e-05	223123488	223132579	TLR5
chr18	9180794	9182588	-0.16	5.8	-5.96	3.68e-07	5.82e-05	9182382	9211621	ANKRD12
chr3	119935495	119937515	0.81	6.01	-5.2	3.71e-07	5.87e-05	119826701	119876508	GSK3B
chr1	8728774	8730574	-0.16	5.79	-5.96	3.72e-07	5.87e-05	8464970	8753838	RERE
chr5	115291867	115295743	1.18	6.32	-5.14	3.72e-07	5.87e-05	115267355	115296065	CCDC112
chr4	48660905	48662830	0.64	5.91	-5.27	3.73e-07	5.87e-05	48617604	48653917	FRYL
chr14	73164987	73166790	-0.16	5.79	-5.96	3.75e-07	5.88e-05	73167829	73220401	PSEN1
chr2	147972910	147976678	0.53	6.16	-5.63	3.76e-07	5.89e-05	147951448	147972829	ORC4
chrUn_GL000195v1	69266	71737	-0.16	6.44	-6.6	3.83e-07	5.99e-05	42939	49164	LOC389831
chr11	100832279	100834332	-0.16	5.75	-5.92	3.84e-07	6e-05	100839404	100859629	ARHGAP42
chr7	64505470	64506514	-0.16	5.73	-5.89	3.93e-07	6.12e-05	64522450	64544219	ZNF680
chr2	152679867	152688346	2.37	8.39	-6.02	3.95e-07	6.14e-05	152679129	152693111	PRPF40A
chr8	17956785	17958242	-0.16	5.78	-5.94	3.99e-07	6.18e-05	17957658	17962213	PCM1
chr15	82970038	82971607	0.23	5.87	-5.65	3.99e-07	6.18e-05	82864213	82986120	HOMER2
chr8	102295040	102297846	1.49	6.69	-5.2	4e-07	6.18e-05	102287505	102293709	UBR5
chr17	21128136	21133766	1.63	7	-5.37	4.01e-07	6.19e-05	21126964	21191445	DHRS7B
chr4	114490055	114491878	0.55	5.88	-5.33	4.02e-07	6.19e-05	114598770	114623305	UGT8
chr11	76474724	76476774	0.78	5.98	-5.2	4.09e-07	6.3e-05	76446939	76553025	EMSY
chr3	176360619	176362593	0.24	5.87	-5.64	4.12e-07	6.33e-05	176515103	176515151	MIR7977
chr14	27632026	27633065	-0.16	5.78	-5.94	4.14e-07	6.35e-05	27633205	27633278	MIR3171
chr4	56118689	56119983	-0.16	5.8	-5.97	4.15e-07	6.35e-05	56170195	56328625	CRACD
chr4	92670263	92671820	-0.16	5.8	-5.97	4.23e-07	6.46e-05	92822949	93112247	GRID2
chr3	15690597	15693411	0.3	5.74	-5.44	4.28e-07	6.52e-05	15689840	15696231	ANKRD28
chr10	87789337	87794569	1.91	7.32	-5.41	4.28e-07	6.52e-05	87753117	87814882	ATAD1
chr3	197612065	197614649	-0.16	6.05	-6.21	4.31e-07	6.55e-05	197578213	197615660	LOC220729
chr1	64787258	64788988	-0.16	5.77	-5.93	4.36e-07	6.62e-05	64778066	64816509	RAVER2
chr4	173241981	173244418	0.53	5.97	-5.44	4.37e-07	6.62e-05	173268160	173268233	MIR548T
chr15	57232671	57234942	-0.16	5.97	-6.13	4.41e-07	6.67e-05	57248016	57263224	TCF12
chr6	57333123	57335557	-0.16	5.75	-5.91	4.42e-07	6.67e-05	57317630	57646850	PRIM2
chr4	153491778	153495056	1.36	6.43	-5.08	4.45e-07	6.7e-05	153466360	153636711	TMEM131L
chr3	87229747	87233029	1.64	6.47	-4.83	4.46e-07	6.7e-05	87227309	87255556	CHMP2B
chr17	60075718	60078185	-0.16	5.83	-6	4.46e-07	6.7e-05	60069809	60076185	HEATR6
chr1	52143999	52146312	2.05	6.44	-4.39	4.48e-07	6.72e-05	52142374	52346515	ZFYVE9
chr1	93522608	93524398	-0.16	5.73	-5.89	4.49e-07	6.72e-05	93529710	93552579	FNBP1L
chr17	43147139	43149886	1	6.11	-5.12	4.5e-07	6.72e-05	43148705	43160009	LOC101929767
chr5	179066370	179068377	-0.16	5.7	-5.86	4.52e-07	6.74e-05	179060373	179083977	ZNF354C
chr7	6046617	6048267	-0.16	5.77	-5.93	4.54e-07	6.75e-05	6040959	6046902	EIF2AK1
chr4	56367895	56371166	-0.16	5.87	-6.03	4.54e-07	6.75e-05	56382424	56384299	AASDH
chr13	93619186	93624705	-0.16	5.82	-5.99	4.56e-07	6.77e-05	93818424	93836144	GPC6-AS2
chr9	34452963	34455008	1.51	6.27	-4.76	4.58e-07	6.79e-05	34457414	34488537	DNAI1
chr3	58804393	58805616	0.79	5.85	-5.05	4.62e-07	6.83e-05	58824437	59017637	C3orf67-AS1
chr11	32973677	32976062	-0.16	5.89	-6.05	4.64e-07	6.84e-05	32957806	32969068	QSER1
chr15	69442825	69444045	0.23	5.76	-5.54	4.65e-07	6.84e-05	69443605	69447884	KIF23
chr6	108639676	108641449	-0.16	5.94	-6.1	4.67e-07	6.86e-05	108656346	108680751	FOXO3
chr6	149390612	149398288	2.56	8.09	-5.53	4.68e-07	6.87e-05	149397692	149409617	TAB2
chr2	188448636	188449892	-0.16	5.69	-5.85	4.73e-07	6.93e-05	188139637	188384313	LINC01090
chr3	47659680	47665428	2.01	7.58	-5.56	4.74e-07	6.93e-05	47670350	47678365	SMARCC1
chr7	128610017	128615573	2.36	7.4	-5.04	4.79e-07	6.99e-05	128672288	128678112	FAM71F2
chr20	39007035	39008752	-0.16	5.78	-5.94	4.8e-07	6.99e-05	39021873	39038646	DHX35
chr15	42865494	42868358	-0.16	5.78	-5.94	4.8e-07	6.99e-05	42829941	42908275	TTBK2
chr1	227207734	227212517	0.78	6.09	-5.31	4.85e-07	7.05e-05	227199557	227254155	CDC42BPA
chr1	56562936	56564241	-0.16	5.85	-6.01	4.85e-07	7.05e-05	56494761	56579563	PLPP3
chr2	88571525	88578551	1.86	7.29	-5.43	4.87e-07	7.05e-05	88570920	88575408	EIF2AK3
chr2	203494670	203497171	-0.16	5.68	-5.84	4.89e-07	7.07e-05	203439437	203495353	RAPH1
chr6	76592466	76597730	1.96	7.52	-5.56	4.89e-07	7.07e-05	76521640	76593821	LINC02540
chr1	222636650	222638458	0.78	5.94	-5.16	4.93e-07	7.11e-05	222644303	222665823	MIA3
chr5	180266466	180269132	0.23	5.79	-5.57	4.94e-07	7.11e-05	180253507	180264842	MAPK9
chr8	42905391	42907594	1.49	6.66	-5.16	4.97e-07	7.14e-05	42887728	42897290	RNF170
chr4	48632882	48635892	1.18	6.34	-5.15	4.99e-07	7.15e-05	48497361	48634410	FRYL
chr10	5706612	5709663	1.49	6.59	-5.09	4.99e-07	7.15e-05	5709626	5714574	TASOR2
chr3	44733290	44739025	2.16	7.73	-5.57	5.04e-07	7.2e-05	44729781	44732265	ZNF501
chr2	47820374	47821820	-0.16	5.76	-5.92	5.06e-07	7.23e-05	47809230	47814298	FBXO11
chr14	22976069	22977476	-0.16	5.86	-6.02	5.08e-07	7.23e-05	22971815	22977223	AJUBA
chr1	211268627	211271927	-0.16	5.78	-5.94	5.09e-07	7.24e-05	211279238	211313474	RCOR3
chr18	35476590	35479466	0.78	6.27	-5.49	5.1e-07	7.25e-05	35468711	35487470	INO80C
chr1	196594087	196598459	1.75	7.05	-5.3	5.19e-07	7.36e-05	196227859	196608359	KCNT2
chr7	141141682	141143700	0.23	5.98	-5.76	5.22e-07	7.39e-05	141074393	141212764	TMEM178B
chr14	51996805	51998429	-0.16	5.68	-5.84	5.23e-07	7.39e-05	51997925	51999873	RTRAF
chr1	20999792	21002061	0.23	5.69	-5.46	5.25e-07	7.4e-05	20988314	20988432	MIR1256
chr1	93119912	93121184	-0.16	5.66	-5.82	5.26e-07	7.4e-05	93120793	93136852	MTF2
chr18	62866038	62868135	1	6.03	-5.04	5.35e-07	7.52e-05	62832174	62895088	PHLPP1
chr1	225778119	225783120	1.35	6.67	-5.33	5.36e-07	7.52e-05	225777935	225789524	SRP9
chr11	11852400	11855336	1.75	6.93	-5.18	5.36e-07	7.52e-05	11842066	11959323	USP47
chr5	119468936	119471014	0.64	6	-5.36	5.42e-07	7.58e-05	119471661	119541994	HSD17B4
chr1	85702193	85704363	-0.16	5.75	-5.91	5.45e-07	7.61e-05	85649417	85708433	ZNHIT6
chr8	75272576	75274668	-0.16	5.91	-6.07	5.51e-07	7.68e-05	75223404	75278461	CASC9
chr11	14273888	14275295	1.52	6.23	-4.71	5.52e-07	7.68e-05	14262447	14265999	SPON1
chr3	197220616	197223834	1.75	7	-5.25	5.54e-07	7.7e-05	197042943	197223014	DLG1
chr9	83662184	83667545	2.54	7.55	-5.01	5.57e-07	7.72e-05	83661911	83665393	UBQLN1
chr3	32901088	32902962	-0.16	5.73	-5.89	5.59e-07	7.73e-05	32951644	32956349	CCR4
chr15	40978590	40980211	-0.16	5.64	-5.8	5.63e-07	7.78e-05	40979911	40983219	INO80
chr18	55484990	55487251	2.36	6.89	-4.53	5.69e-07	7.84e-05	55479221	55479298	MIR4529
chr2	68216434	68218099	-0.16	5.7	-5.86	5.69e-07	7.84e-05	68180947	68251148	PPP3R1
chr16	69698071	69700129	-0.16	5.7	-5.86	5.7e-07	7.84e-05	69690544	69692053	NFAT5
chr17	4224243	4226780	1.49	6.55	-5.06	5.73e-07	7.86e-05	4194461	4242450	ANKFY1
chr13	47975860	47976654	-0.16	5.68	-5.84	5.74e-07	7.87e-05	47948940	47988548	SUCLA2
chr12	12117541	12119664	0.53	5.85	-5.32	5.76e-07	7.88e-05	12111952	12112036	MIR1244-1
chr18	55492889	55497125	1.18	6.71	-5.53	5.81e-07	7.94e-05	55227689	55510772	TCF4
chr7	77612324	77614747	1.49	6.6	-5.1	5.9e-07	8.05e-05	77606928	77611046	PTPN12
chr6	57143619	57145807	0.3	6.14	-5.84	5.96e-07	8.12e-05	57152157	57154160	ZNF451
chr4	150948925	150950252	-0.16	5.7	-5.86	6.01e-07	8.18e-05	150264853	151015224	LRBA
chr1	180367718	180370019	0.24	5.82	-5.58	6.04e-07	8.2e-05	180286983	180413388	ACBD6
chr2	159762824	159764340	-0.16	5.65	-5.81	6.08e-07	8.24e-05	159759292	159767850	MARCHF7
chr2	161352519	161355097	1.41	6.15	-4.74	6.21e-07	8.37e-05	161381360	161411715	PSMD14
chr13	21403809	21405127	0.3	5.69	-5.4	6.21e-07	8.37e-05	21376515	21390254	ZDHHC20
chr3	157147566	157160104	2.85	9.37	-6.52	6.21e-07	8.37e-05	157147795	157154666	CCNL1
chr18	9137738	9140115	-0.16	5.72	-5.88	6.22e-07	8.37e-05	9137563	9283759	ANKRD12
chr2	121508662	121511583	-0.16	5.89	-6.05	6.22e-07	8.37e-05	121462535	121513073	CLASP1
chr5	94624058	94628485	0.78	6.07	-5.29	6.23e-07	8.37e-05	94628882	94665926	SLF1
chr12	101816480	101817929	0.81	5.93	-5.13	6.24e-07	8.37e-05	101795871	101830663	GNPTAB
chr13	41914674	41918381	-0.16	5.71	-5.87	6.29e-07	8.42e-05	41955808	41980977	VWA8-AS1
chr6	30616012	30617190	0.81	5.89	-5.08	6.35e-07	8.5e-05	30600413	30617243	PPP1R10
chr2	165763799	165766122	1	6.22	-5.22	6.39e-07	8.53e-05	165757068	165764959	GALNT3
chr22	35292840	35293944	-0.16	5.69	-5.85	6.42e-07	8.55e-05	35299275	35323630	TOM1
chr2	39415423	39416912	-0.16	5.7	-5.87	6.46e-07	8.6e-05	39436530	39601410	MAP4K3-DT
chr6	70686911	70689510	-0.16	5.79	-5.96	6.51e-07	8.65e-05	70668530	70862011	SMAP1
chr10	95240263	95242288	-0.16	5.71	-5.87	6.52e-07	8.65e-05	95237940	95238848	PDLIM1
chr6	99544326	99550821	2.71	7.92	-5.21	6.54e-07	8.66e-05	99545205	99549647	CCNC
chr1	90927813	90931121	1.79	7.06	-5.26	6.55e-07	8.67e-05	90916490	90935528	ZNF644
chr21	25977230	25980190	0.92	6.1	-5.18	6.58e-07	8.69e-05	25997188	26051018	APP
chr6	69754783	69757121	0.24	6.11	-5.87	6.61e-07	8.71e-05	69675974	69749408	LMBRD1
chr6	100817759	100819786	0.78	5.97	-5.19	6.63e-07	8.73e-05	100848004	100881301	ASCC3
chr6	79040155	79041400	-0.16	5.78	-5.94	6.65e-07	8.74e-05	78934419	79078254	PHIP
chr12	32314783	32316450	0.23	5.66	-5.43	6.69e-07	8.79e-05	32328402	32333065	BICD1
chr20	18658349	18660436	-0.16	5.63	-5.79	6.74e-07	8.83e-05	18674395	18698709	DTD1-AS1
chr6	149517931	149519669	-0.16	5.77	-5.93	6.75e-07	8.83e-05	149505275	149517864	PPIL4
chr10	21269212	21273133	-0.16	6.34	-6.51	6.75e-07	8.83e-05	21174354	21174923	NEBL-AS1
chr1	35460804	35463456	-0.16	5.85	-6.01	6.85e-07	8.94e-05	35434105	35454707	KIAA0319L
chr7	24385996	24388962	2.36	7.17	-4.81	6.89e-07	8.98e-05	24285107	24291824	NPY
chr6	149702126	149707637	1.86	7.1	-5.24	7.01e-07	9.12e-05	149661094	149702354	LATS1
chr1	232147775	232149811	-0.16	5.72	-5.89	7.1e-07	9.22e-05	231925834	231945233	DISC1-IT1
chr21	42912048	42915553	1.67	6.77	-5.1	7.12e-07	9.24e-05	42916803	42925646	ERVH48-1
chr19	49839696	49841530	0.24	5.63	-5.39	7.16e-07	9.27e-05	49832884	49836979	MED25
chr12	104310982	104313236	0.92	6.2	-5.28	7.17e-07	9.28e-05	104309851	104348483	TXNRD1
chr21	42703243	42705089	0.53	5.78	-5.25	7.23e-07	9.34e-05	42686197	42762139	PDE9A
chr12	70370087	70371674	-0.16	5.86	-6.02	7.28e-07	9.39e-05	70366290	70434292	KCNMB4
chr2	169564834	169567135	0.78	5.88	-5.1	7.34e-07	9.44e-05	169560271	169563390	FASTKD1
chr16	15094725	15095842	-0.16	5.59	-5.75	7.35e-07	9.44e-05	15094411	15109197	LOC100505915
chr1	70422088	70423653	-0.16	5.69	-5.85	7.4e-07	9.49e-05	70411383	70439204	CTH
chr1	227225447	227226656	-0.16	5.62	-5.78	7.44e-07	9.52e-05	227199557	227254155	CDC42BPA
chr8	42400837	42402355	-0.16	5.7	-5.86	7.5e-07	9.58e-05	42403032	42405415	VDAC3
chr3	45725912	45728356	0.64	6.18	-5.54	7.57e-07	9.65e-05	45730603	45738835	SACM1L
chr17	35635488	35636919	0.24	5.62	-5.38	7.57e-07	9.65e-05	35624582	35657615	AP2B1
chr2	108454898	108456695	0.53	5.78	-5.25	7.61e-07	9.69e-05	108449884	108472899	GCC2
chr21	39623113	39626600	2.44	7.24	-4.8	7.63e-07	9.7e-05	39612940	39662888	B3GALT5
chr13	51185980	51187839	-0.16	6.16	-6.33	7.65e-07	9.71e-05	51083209	51200252	C13orf42
chr2	55015556	55016899	-0.16	5.61	-5.77	7.69e-07	9.75e-05	54972187	55010449	RTN4
chr6	37286567	37288165	-0.16	5.62	-5.78	7.85e-07	9.91e-05	37217324	37258155	TMEM217
chr3	15787256	15789276	-0.16	5.72	-5.88	7.96e-07	0.0001	15677536	15796506	ANKRD28
chr10	31874716	31877156	-0.16	5.84	-6	7.99e-07	0.000101	31820444	31854180	ARHGAP12
chr4	42047185	42049124	1	5.95	-4.95	8.02e-07	0.000101	42063034	42078851	SLC30A9
chr4	118702069	118703249	0.23	5.66	-5.43	8.04e-07	0.000101	118697211	118710601	METTL14
chr15	72767809	72769578	-0.16	5.63	-5.79	8.07e-07	0.000101	72760249	72775114	ADPGK
chr19	21817861	21819310	-0.16	5.6	-5.76	8.09e-07	0.000101	21809479	21836187	ZNF43
chr5	50744360	50746873	1.38	6.38	-4.99	8.16e-07	0.000102	50667893	50842342	PARP8
chr11	17147258	17148782	-0.16	5.75	-5.91	8.19e-07	0.000102	17086572	17169741	PIK3C2A
chr8	70346837	70349202	1.38	6.46	-5.08	8.2e-07	0.000102	70112070	70402079	NCOA2
chr1	20751916	20756561	1.99	7.23	-5.24	8.22e-07	0.000102	20745592	20750251	HP1BP3
chr8	129896417	129898065	-0.16	5.58	-5.75	8.23e-07	0.000102	129849292	129903351	FAM49B
chr15	82413450	82414826	-0.16	5.57	-5.73	8.3e-07	0.000103	82418651	82434235	GOLGA6L9
chr4	91624147	91625660	1.16	6.06	-4.9	8.41e-07	0.000104	91085950	91601913	CCSER1
chr12	50454412	50456490	-0.16	5.83	-5.99	8.41e-07	0.000104	50440479	50454962	LARP4
chr11	35681902	35683734	0.53	5.68	-5.15	8.43e-07	0.000104	35662775	35818007	TRIM44
chr22	38368226	38370099	-0.16	5.66	-5.82	8.49e-07	0.000105	38361381	38384096	TPTEP2
chr13	79385499	79391782	2.99	7.73	-4.74	8.5e-07	0.000105	79319954	79405788	RBM26
chr9	131933896	131935884	1.03	6.04	-5.01	8.54e-07	0.000105	132031886	132079645	MED27
chr8	73052530	73056875	1.97	7.21	-5.24	8.54e-07	0.000105	73031613	73038804	TERF1
chr10	98218661	98220700	-0.16	5.58	-5.74	8.58e-07	0.000105	98247690	98268194	LOXL4
chr6	132498687	132500579	0.81	5.83	-5.02	8.6e-07	0.000105	132475280	132513065	STX7
chr2	195624302	195627333	-0.16	6.13	-6.29	8.6e-07	0.000105	195656747	195737702	SLC39A10
chr3	139371675	139374543	1.65	6.25	-4.6	8.72e-07	0.000106	139357832	139371796	COPB2
chr6	25403340	25404716	0.81	5.82	-5.01	8.72e-07	0.000106	25081109	25452184	CMAHP
chr16	71759294	71763676	1.75	6.86	-5.11	8.74e-07	0.000106	71758402	71758487	SNORD71
chr1	180020100	180023074	-0.16	5.74	-5.9	8.78e-07	0.000107	180041203	180053834	CEP350
chr6	79007966	79009623	1.18	6.11	-4.93	8.94e-07	0.000109	78940546	78982943	PHIP
chr17	29508943	29510423	0.3	5.69	-5.39	8.97e-07	0.000109	29522288	29530738	TAOK1
chr1	178432693	178434441	0.55	5.83	-5.27	9.08e-07	0.00011	178452437	178473522	RASAL2
chr19	36581070	36582493	-0.16	5.64	-5.81	9.08e-07	0.00011	36577228	36594708	ZNF529-AS1
chr5	123540126	123541671	-0.16	5.83	-5.99	9.1e-07	0.00011	123545415	123615455	CSNK1G3
chr10	113872782	113873851	-0.16	5.75	-5.91	9.17e-07	0.000111	113854824	113858852	NHLRC2
chr18	9605254	9606452	-0.16	5.64	-5.8	9.3e-07	0.000112	9588152	9599741	PPP4R1
chr22	45182406	45187004	1.97	7.16	-5.19	9.47e-07	0.000114	45177699	45185624	NUP50
chr6	161004345	161005966	-0.16	5.63	-5.8	9.5e-07	0.000114	160991844	161117308	MAP3K4
chr17	67901745	67903318	-0.16	5.63	-5.79	9.62e-07	0.000115	67893221	67894078	BPTF
chr12	45225010	45225857	-0.16	5.55	-5.71	9.82e-07	0.000118	45216120	45313512	ANO6
chr9	122924881	122927145	-0.16	5.81	-5.97	9.87e-07	0.000118	122918100	122931265	ZBTB26
chr22	40766877	40768512	-0.16	5.56	-5.72	9.99e-07	0.000119	40770088	40780194	SLC25A17
chr2	165768008	165769746	1.95	6.53	-4.57	1.01e-06	0.000121	165770666	165771691	GALNT3
chr2	69334977	69336857	-0.16	5.63	-5.8	1.02e-06	0.000122	69350098	69363592	GFPT1
chr2	232059568	232060561	-0.16	5.53	-5.69	1.03e-06	0.000122	232015852	232130875	DIS3L2
chr10	73554717	73555824	0.23	5.67	-5.44	1.03e-06	0.000123	73498295	73553340	USP54
chr20	47355352	47356492	-0.16	5.55	-5.71	1.04e-06	0.000123	47209214	47355657	ZMYND8
chr2	147870508	147875956	2.36	7.36	-4.99	1.04e-06	0.000123	147845029	147930822	ACVR2A
chr2	64099805	64102751	1	6.25	-5.25	1.04e-06	0.000123	64143239	64229605	LOC100507006
chr3	138565043	138568663	1.3	6.52	-5.22	1.04e-06	0.000123	138536919	138591956	CEP70
chr8	79944133	79945409	0.53	5.66	-5.13	1.04e-06	0.000123	79957803	80003148	MRPS28
chr21	15021757	15023140	0.81	5.8	-4.99	1.05e-06	0.000123	14818843	15014430	LINC02246
chr7	107489732	107491396	0.24	5.57	-5.33	1.05e-06	0.000123	107362068	107480942	COG5
chr18	62766282	62769574	2.27	6.89	-4.62	1.06e-06	0.000124	62779399	62860513	PHLPP1
chr10	14907986	14909770	0.81	5.82	-5.01	1.06e-06	0.000124	14909170	14911322	DCLRE1C
chr7	93706253	93708600	-0.16	5.66	-5.83	1.07e-06	0.000125	93716928	93717005	MIR4652
chr2	159764585	159766039	-0.16	5.52	-5.68	1.07e-06	0.000125	159759292	159767850	MARCHF7
chr1	6868559	6869944	-0.16	5.69	-5.85	1.07e-06	0.000125	6874056	6887842	CAMTA1
chr2	202039703	202044418	2.25	7.05	-4.8	1.08e-06	0.000126	202034587	202038445	FZD7
chr13	77012401	77016548	2.6	6.93	-4.33	1.08e-06	0.000126	76992598	77015581	FBXL3
chr2	44368884	44370262	-0.16	5.66	-5.82	1.09e-06	0.000126	44369711	44392000	CAMKMT
chr6	30285515	30287427	-0.16	5.53	-5.69	1.09e-06	0.000127	30292245	30296237	HCG18
chr7	23683591	23685829	1.38	6.3	-4.92	1.1e-06	0.000127	23680199	23702650	FAM221A
chr2	110649658	110651303	0.23	5.55	-5.32	1.1e-06	0.000127	110648817	110650739	BUB1
chr1	227309237	227312976	2.07	7.3	-5.23	1.1e-06	0.000127	227193651	227317047	CDC42BPA
chr8	18986525	18989362	-0.16	5.57	-5.73	1.12e-06	0.000129	18527303	19013686	PSD3
chr6	154820703	154825817	3.05	7.6	-4.54	1.12e-06	0.00013	154832697	155257723	TIAM2
chr1	150441274	150443319	0.78	6.01	-5.23	1.12e-06	0.00013	150487364	150507609	TARS2
chr2	36376326	36377637	-0.16	5.5	-5.67	1.13e-06	0.000131	36356471	36378903	CRIM1
chr3	176296181	176297073	-0.16	5.52	-5.68	1.15e-06	0.000132	176515103	176515151	MIR7977
chr15	63229244	63231732	-0.16	6.1	-6.26	1.15e-06	0.000132	63189606	63267776	RAB8B
chr9	6860453	6862225	-0.16	5.55	-5.71	1.15e-06	0.000132	6893123	6948214	KDM4C
chr5	36880583	36882823	1.53	6.4	-4.87	1.16e-06	0.000132	36876841	37065394	NIPBL
chr17	67892182	67892949	0.24	5.53	-5.29	1.16e-06	0.000132	67893221	67894078	BPTF
chr3	183449895	183452640	1.78	6.59	-4.81	1.17e-06	0.000133	183451741	183455335	LINC00888
chr4	84629322	84632315	-0.16	5.74	-5.91	1.17e-06	0.000134	84583269	84619511	CDS1
chr5	31532790	31536535	1.66	6.43	-4.77	1.19e-06	0.000136	31532316	31545714	C5orf22
chr11	121302144	121304460	-0.16	5.81	-5.97	1.2e-06	0.000137	121304385	121307265	SC5D
chr9	115439209	115441062	0.24	5.6	-5.36	1.21e-06	0.000137	115400346	115401315	2021-12-01
chr10	74895770	74897275	0.23	5.54	-5.31	1.22e-06	0.000139	74842883	74970271	KAT6B
chr17	30175168	30176850	0.92	5.94	-5.02	1.23e-06	0.000139	30198476	30203682	SLC6A4
chr4	153503480	153505210	-0.16	5.64	-5.8	1.25e-06	0.000141	153466360	153636711	TMEM131L
chr12	50534238	50536684	1.35	6.18	-4.83	1.25e-06	0.000141	50504985	50748657	DIP2B
chr15	99646862	99648910	-0.16	5.48	-5.64	1.26e-06	0.000142	99706595	99715962	MEF2A
chr12	65190979	65193111	-0.16	5.58	-5.74	1.27e-06	0.000143	65169583	65248355	LEMD3
chr9	16835046	16836204	-0.16	5.49	-5.65	1.27e-06	0.000143	16583060	16867692	BNC2
chr7	51052117	51054012	1.19	6.07	-4.89	1.28e-06	0.000143	51017280	51035955	COBL
chr9	110063486	110066914	2.01	7.17	-5.16	1.29e-06	0.000144	110048698	110168633	PALM2AKAP2
chr12	11150033	11153620	1.65	6.2	-4.55	1.29e-06	0.000144	11132958	11134644	TAS2R30
chr9	5638315	5640110	-0.16	5.54	-5.7	1.29e-06	0.000144	5629119	5776552	RIC1
chr3	71281110	71282750	1.35	6.19	-4.85	1.29e-06	0.000144	71197886	71288369	FOXP1
chr3	58021934	58024135	-0.16	5.57	-5.73	1.3e-06	0.000144	58008400	58172251	FLNB
chr6	152984869	152987544	1.16	6.3	-5.15	1.3e-06	0.000144	152970529	152983579	FBXO5
chr9	37756791	37759144	0.23	5.52	-5.3	1.31e-06	0.000146	37753817	37778681	TRMT10B
chr2	10655325	10657183	-0.16	5.53	-5.69	1.32e-06	0.000146	10622023	10671690	NOL10
chr3	23328663	23330100	0.81	5.78	-4.97	1.33e-06	0.000147	23208700	23270989	UBE2E2
chr10	74836066	74836907	-0.16	5.53	-5.69	1.34e-06	0.000148	74842620	74908597	KAT6B
chr5	31537816	31541776	1.75	6.68	-4.93	1.34e-06	0.000148	31538173	31545714	C5orf22
chr5	50678639	50680303	0.23	5.63	-5.41	1.35e-06	0.000149	50667893	50842342	PARP8
chr5	50722313	50723635	0.78	5.82	-5.04	1.36e-06	0.000149	50667893	50842342	PARP8
chr3	38187011	38188986	-0.16	5.62	-5.78	1.36e-06	0.000149	38165647	38230693	OXSR1
chr11	34941099	34942505	1.09	5.77	-4.68	1.37e-06	0.00015	34941837	34941920	MIR1343
chr6	76630800	76632638	1.78	6.43	-4.65	1.38e-06	0.000151	76521640	76593821	LINC02540
chr1	161022508	161023814	0.53	5.71	-5.18	1.38e-06	0.000151	160995211	161021343	F11R
chr20	13729218	13730693	-0.16	5.62	-5.78	1.38e-06	0.000151	13728399	13782597	ESF1
chr15	73076354	73079264	2.01	6.7	-4.7	1.39e-06	0.000151	73052610	73302718	NEO1
chr6	154826623	154828850	1.18	6.22	-5.04	1.39e-06	0.000151	154832697	155257723	TIAM2
chr14	103450526	103452243	1.21	5.92	-4.71	1.4e-06	0.000153	103465714	103503281	MARK3
chr5	75470121	75475101	1.83	6.98	-5.15	1.42e-06	0.000155	75371121	75506004	CERT1
chr1	200400809	200403205	-0.16	5.83	-5.99	1.42e-06	0.000155	200366591	200400705	LINC00862
chr8	12207573	12218365	-0.16	5.79	-5.95	1.43e-06	0.000155	12194467	12196280	FAM85A
chr14	49830491	49831895	0.55	5.62	-5.06	1.43e-06	0.000155	49783828	49832253	NEMF
chr9	106995450	106997163	0.55	5.75	-5.19	1.43e-06	0.000155	107009189	107011018	ZNF462
chr2	1134179	1135143	0.24	5.64	-5.4	1.44e-06	0.000156	1163247	1220057	SNTG2
chr14	63392822	63394175	-0.16	5.46	-5.63	1.45e-06	0.000156	63384531	63453776	PPP2R5E
chr1	35467686	35469550	-0.16	5.54	-5.7	1.45e-06	0.000156	35438542	35470906	KIAA0319L
chr5	10246819	10248246	-0.16	5.5	-5.66	1.45e-06	0.000156	10227558	10249885	ATPSCKMT
chr9	36336631	36338274	-0.16	5.82	-5.98	1.45e-06	0.000156	36214441	36277056	GNE
chr3	150581618	150582922	1	5.96	-4.96	1.47e-06	0.000157	150572496	150583903	EIF2A
chr2	222909386	222915023	2.07	7.23	-5.16	1.47e-06	0.000157	222909616	222921353	ACSL3
chr3	125329391	125330907	-0.16	5.53	-5.69	1.48e-06	0.000158	125313415	125357280	ZNF148
chr13	51411021	51412064	-0.16	5.49	-5.65	1.48e-06	0.000159	51365228	51421374	INTS6
chr12	46411538	46414492	-0.16	5.94	-6.1	1.49e-06	0.00016	46412150	46485060	LOC100288798
chr3	98580620	98584334	1	6.15	-5.15	1.51e-06	0.000161	98521133	98585498	CLDND1
chr7	152335837	152336651	-0.16	5.45	-5.61	1.51e-06	0.000162	152309934	152312296	KMT2C
chr9	95893471	95895063	0.53	5.6	-5.07	1.52e-06	0.000162	95876143	95967160	ERCC6L2
chr6	128350453	128352779	-0.16	5.56	-5.72	1.53e-06	0.000163	128184432	128322181	PTPRK
chr1	235241028	235244359	1.75	6.76	-5.01	1.54e-06	0.000164	235180139	235234492	ARID4B
chr1	114421331	114422541	-0.16	5.49	-5.65	1.55e-06	0.000164	114404326	114406967	TRIM33
chr13	48983388	48990755	2.33	7.82	-5.49	1.56e-06	0.000165	48976673	49209607	FNDC3A
chr11	9869410	9870923	-0.16	5.48	-5.64	1.56e-06	0.000165	9808912	9839603	SBF2
chr8	103438982	103440588	-0.16	5.54	-5.7	1.56e-06	0.000165	103415412	103443450	DCAF13
chr12	111544866	111546176	-0.16	5.47	-5.63	1.58e-06	0.000167	111452463	111552306	ATXN2
chr4	185261810	185263182	0.64	5.61	-4.96	1.59e-06	0.000167	185295827	185363510	SNX25
chr13	28246096	28252186	1.67	6.74	-5.07	1.59e-06	0.000167	28239557	28256539	PAN3
chr19	23360760	23362025	-0.16	5.44	-5.6	1.59e-06	0.000168	23362125	23395418	ZNF91
chr6	38049065	38051721	2.04	6.83	-4.8	1.6e-06	0.000168	38061611	38062660	ZFAND3
chr17	36537247	36538848	-0.16	5.51	-5.67	1.6e-06	0.000168	36535555	36539310	PIGW
chr8	67068798	67070432	-0.16	5.65	-5.81	1.6e-06	0.000168	67043079	67064943	COPS5
chr5	37310884	37317337	2.75	7.76	-5.02	1.61e-06	0.000168	37291838	37310668	NUP155
chr4	119233740	119235531	-0.16	5.45	-5.61	1.62e-06	0.000169	119239216	119295517	USP53
chr2	203512813	203515028	1.64	6.22	-4.58	1.62e-06	0.000169	203444850	203495353	RAPH1
chr6	154833790	154837103	1.36	6.54	-5.18	1.63e-06	0.00017	154832697	155257723	TIAM2
chr10	77873327	77874255	0.53	5.6	-5.07	1.64e-06	0.00017	77790791	77869191	DLG5
chr6	128513364	128514677	-0.16	5.61	-5.77	1.65e-06	0.000171	127969896	128520358	PTPRK
chr9	74070099	74071940	-0.16	5.55	-5.72	1.66e-06	0.000172	74371335	74373048	LOC101927358
chr1	246608478	246610575	0.64	5.64	-4.99	1.67e-06	0.000173	246566514	246633957	CNST
chr6	111765711	111767917	1	5.99	-4.99	1.67e-06	0.000173	111702878	111759925	FYN
chr6	135004125	135005085	-0.16	5.53	-5.69	1.69e-06	0.000174	134982293	134987745	HBS1L
chr15	58874632	58876655	-0.16	5.45	-5.62	1.69e-06	0.000174	58865175	59031216	RNF111
chr3	61888180	61889665	0.64	5.67	-5.03	1.7e-06	0.000175	61561911	62293329	PTPRG
chr4	55538433	55540191	-0.16	5.6	-5.76	1.71e-06	0.000176	55434823	55545932	CLOCK
chr5	36955209	36960007	2.07	7.19	-5.12	1.71e-06	0.000176	36954968	36975897	NIPBL
chr10	17679968	17682078	-0.16	5.51	-5.67	1.72e-06	0.000177	17684785	17688157	STAM
chr12	31525482	31527471	-0.16	5.6	-5.76	1.73e-06	0.000177	31451702	31495902	DENND5B
chr4	92528106	92529793	1	5.91	-4.91	1.74e-06	0.000178	92304657	93772498	GRID2
chr5	179966672	179967495	-0.16	5.42	-5.58	1.75e-06	0.000179	179955480	179963943	RNF130
chr6	15652267	15653938	-0.16	5.55	-5.71	1.76e-06	0.00018	15523985	15662920	DTNBP1
chr10	68671178	68672456	-0.16	5.42	-5.58	1.76e-06	0.00018	68721012	68742408	CCAR1
chr17	68532749	68534064	-0.16	5.44	-5.6	1.76e-06	0.00018	68527584	68530319	PRKAR1A
chr22	32870922	32872502	0.78	5.8	-5.02	1.77e-06	0.00018	32629606	32869100	SYN3
chr9	81688042	81689407	-0.16	5.42	-5.58	1.77e-06	0.00018	81620454	81688448	TLE1
chr21	33571580	33573162	-0.16	5.49	-5.65	1.77e-06	0.00018	33571735	33576447	SON
chr10	91844576	91846764	-0.16	5.5	-5.66	1.8e-06	0.000182	91798426	91865475	TNKS2
chr2	182982444	182984027	-0.16	5.42	-5.58	1.8e-06	0.000182	182957141	182964764	NCKAP1
chr2	55574809	55576894	-0.16	5.42	-5.58	1.82e-06	0.000184	55568029	55573718	PPP4R3B
chr6	75643591	75646001	1.63	6.43	-4.8	1.83e-06	0.000185	75646511	75663257	SENP6
chr15	76232617	76233611	0.24	5.46	-5.22	1.83e-06	0.000185	76216321	76231398	ETFA
chr3	50801151	50802561	0.53	5.6	-5.07	1.84e-06	0.000186	50675080	50675163	MIR4787
chr1	229657270	229658819	1	5.74	-4.74	1.85e-06	0.000186	229650847	229659126	URB2
chr2	152530950	152533371	-0.16	5.63	-5.8	1.85e-06	0.000186	152578621	152607653	FMNL2
chr8	114289512	114291548	-0.16	5.51	-5.67	1.86e-06	0.000187	113018776	113436939	CSMD3
chr7	20061944	20066453	1.86	7.02	-5.16	1.87e-06	0.000188	19931071	20125162	LOC101927668
chr4	3136767	3138059	0.59	5.56	-4.98	1.91e-06	0.000191	3140510	3142886	HTT
chr9	101534082	101535916	-0.16	5.4	-5.56	1.91e-06	0.000191	101533979	101540628	RNF20
chr3	123921189	123923512	-0.16	5.8	-5.96	1.93e-06	0.000193	123930772	123931459	CCDC14
chr15	42895340	42896607	-0.16	5.47	-5.63	1.93e-06	0.000193	42829941	42908275	TTBK2
chr4	92744181	92746146	-0.16	5.62	-5.78	1.94e-06	0.000193	92822949	93112247	GRID2
chr16	8817021	8819299	0.78	5.8	-5.02	1.95e-06	0.000194	8807564	8849325	PMM2
chr7	71676991	71678171	-0.16	5.4	-5.56	1.96e-06	0.000195	71779492	71810495	CALN1
chr11	73793891	73795515	-0.16	5.39	-5.55	1.99e-06	0.000198	73787957	73864607	MRPL48
chr1	223791305	223792802	-0.16	5.41	-5.57	2e-06	0.000198	223780645	223800726	TP53BP2
chr7	8232315	8233614	0.23	5.59	-5.37	2e-06	0.000198	8113923	8235926	ICA1
chr10	63282677	63286036	1.97	6.93	-4.96	2.03e-06	0.000201	63215438	63269253	JMJD1C
chr4	169002903	169004041	0.53	5.55	-5.02	2.05e-06	0.000202	168863793	169006788	CBR4
chr6	136391115	136393187	1.41	6.06	-4.65	2.06e-06	0.000203	136343782	136466875	MAP7
chr5	175932055	175933951	-0.16	5.44	-5.6	2.06e-06	0.000203	175926559	175961117	THOC3
chr3	23245746	23247062	-0.16	5.45	-5.62	2.07e-06	0.000204	23208700	23270989	UBE2E2
chr2	42307271	42308125	-0.16	5.44	-5.61	2.09e-06	0.000205	42317474	42319998	EML4
chr18	36026394	36027699	0.92	5.77	-4.85	2.09e-06	0.000205	36025599	36028190	RPRD1A
chr8	117967211	117968301	-0.16	5.37	-5.54	2.12e-06	0.000208	117822465	118110414	EXT1
chr12	12528000	12529747	1.38	6.11	-4.72	2.12e-06	0.000208	12477886	12506187	DUSP16
chr7	105665798	105667352	0.79	5.66	-4.87	2.13e-06	0.000208	105613474	105678018	ATXN7L1
chr19	20636722	20638417	0.53	5.63	-5.1	2.14e-06	0.000209	20621367	20661507	ZNF626
chr6	107898116	107900628	1.38	6.32	-4.94	2.16e-06	0.00021	107893580	107902900	SEC63
chr2	77099632	77101400	-0.16	5.66	-5.82	2.17e-06	0.000212	76985965	77009791	LRRTM4-AS1
chr12	1083193	1085675	-0.16	5.5	-5.66	2.2e-06	0.000215	1083484	1116201	ERC1
chr16	72607739	72609315	-0.16	5.55	-5.71	2.21e-06	0.000215	72479751	72627686	LINC01572
chr12	55827115	55829120	-0.16	5.48	-5.64	2.21e-06	0.000215	55757275	55827546	DNAJC14
chr1	225525411	225532504	2.48	8	-5.53	2.23e-06	0.000216	225495480	225515397	ENAH
chr2	223935630	223937516	-0.16	5.45	-5.61	2.23e-06	0.000216	223757258	223945299	AP1S3
chr2	167421285	167425246	2.71	7.31	-4.61	2.24e-06	0.000217	167248682	167259749	XIRP2
chr13	45163826	45166432	1.78	6.31	-4.53	2.24e-06	0.000217	45206355	45267333	GTF2F2
chr13	51699000	51702198	1.75	6.74	-4.98	2.24e-06	0.000217	51739148	51753123	WDFY2
chr6	63574449	63578565	2.16	7.36	-5.2	2.25e-06	0.000217	63576488	63581462	PTP4A1
chr3	134502308	134503682	-0.16	5.49	-5.65	2.25e-06	0.000217	134495294	134565028	CEP63
chr2	70209894	70211788	-0.16	5.55	-5.71	2.26e-06	0.000217	70212676	70215322	TIA1
chr15	82367606	82372453	0.24	5.73	-5.49	2.26e-06	0.000218	82355142	82414738	UBE2Q2P2
chr13	40736276	40738344	-0.16	5.4	-5.56	2.27e-06	0.000218	40727828	40727875	MIR320D1
chr6	157827982	157829837	-0.16	5.69	-5.86	2.27e-06	0.000218	157823246	157945077	SNX9
chr4	84857469	84859674	0.53	5.57	-5.04	2.28e-06	0.000218	84849673	84860563	WDFY3
chr9	110059576	110062824	1.86	6.82	-4.95	2.29e-06	0.000219	110048698	110168633	PALM2AKAP2
chr2	167419441	167420792	0.59	5.62	-5.03	2.29e-06	0.000219	167248682	167259749	XIRP2
chr12	95179042	95180688	-0.16	5.4	-5.56	2.29e-06	0.000219	95189192	95208956	FGD6
chr7	139409848	139410826	-0.16	5.46	-5.62	2.3e-06	0.000219	139416125	139423156	LUC7L2
chr5	129481022	129482392	0.55	5.52	-4.97	2.3e-06	0.000219	129461676	129528543	ADAMTS19
chr8	94531919	94537463	2.88	7.74	-4.85	2.32e-06	0.00022	94488520	94526302	VIRMA
chr3	31840002	31841564	1.71	6.18	-4.46	2.32e-06	0.000221	31732587	31830180	OSBPL10
chr11	83072354	83080758	2.74	8.05	-5.31	2.33e-06	0.000221	83072355	83073968	RAB30-DT
chr12	116084654	116086601	-0.16	5.44	-5.6	2.34e-06	0.000222	115959364	116096911	MED13L
chr4	152462106	152464224	-0.16	5.4	-5.56	2.36e-06	0.000224	152489327	152489416	MIR3140
chr8	28920577	28922373	1.03	5.8	-4.77	2.36e-06	0.000224	28891316	29051898	HMBOX1
chr1	213112091	213117764	-0.16	5.66	-5.82	2.37e-06	0.000224	213129527	213176704	RPS6KC1
chr4	118689588	118691251	0.55	5.54	-4.99	2.38e-06	0.000225	118691534	118697355	METTL14
chr6	108612375	108613965	0.3	5.46	-5.17	2.39e-06	0.000225	108656346	108680751	FOXO3
chr21	15806972	15808942	-0.16	5.49	-5.65	2.39e-06	0.000225	15799534	15805655	USP25
chr4	92906562	92907899	-0.16	5.54	-5.7	2.39e-06	0.000225	92822949	93166161	GRID2
chr11	124785158	124789159	1.67	6.58	-4.91	2.4e-06	0.000226	124766616	124783290	MSANTD2
chr1	225551258	225553931	1.97	6.91	-4.94	2.41e-06	0.000226	225519044	225567270	ENAH
chr1	186363580	186366377	2.27	6.7	-4.43	2.42e-06	0.000227	186351423	186356538	TPR
chr1	45956483	45958479	0.78	5.61	-4.83	2.43e-06	0.000227	45959386	46011109	MAST2
chr16	71764219	71766030	-0.16	5.64	-5.8	2.43e-06	0.000227	71750210	71764675	AP1G1
chr12	32327491	32328894	1.29	5.86	-4.57	2.43e-06	0.000227	32328402	32333065	BICD1
chr10	94582208	94584056	-0.16	5.36	-5.52	2.43e-06	0.000227	94590699	94613905	HELLS
chr10	94577413	94580511	1.97	6.81	-4.84	2.44e-06	0.000228	94569195	94574448	HELLS
chr5	83521081	83522825	1.35	6.13	-4.78	2.45e-06	0.000229	83512102	83537247	VCAN
chr15	97328400	97331034	1.64	6.15	-4.51	2.46e-06	0.000229	97491204	97515387	LINC02254
chr4	92777759	92778953	1.03	5.87	-4.84	2.46e-06	0.000229	92822949	93112247	GRID2
chr2	62731985	62734014	1	5.88	-4.89	2.46e-06	0.000229	62707192	63045500	EHBP1
chr2	227491541	227492652	-0.16	5.5	-5.67	2.5e-06	0.000232	227508272	227533681	AGFG1
chr14	70389525	70393978	1.67	6.42	-4.75	2.51e-06	0.000232	70326350	70416984	SYNJ2BP-COX16
chr12	68836475	68839573	1.52	6.15	-4.63	2.51e-06	0.000233	68824203	68824758	MDM2
chr21	8222211	8248716	-0.16	6.76	-6.92	2.52e-06	0.000233	8249505	8249596	MIR6724-1
chr15	85593642	85596894	1.49	6.21	-4.72	2.53e-06	0.000233	85582910	85645917	AKAP13
chr6	158320813	158322178	-0.16	5.46	-5.62	2.53e-06	0.000233	158313445	158481538	TULP4
chr4	1953501	1955393	1.38	6.12	-4.74	2.55e-06	0.000235	1955579	1958018	NSD2
chr14	27617373	27619265	-0.16	5.36	-5.52	2.55e-06	0.000235	27613319	27639534	LINC00645
chr12	76482301	76484082	1.16	5.89	-4.74	2.55e-06	0.000235	76397856	76486108	OSBPL8
chr3	37326814	37328316	-0.16	5.35	-5.51	2.58e-06	0.000237	37327765	37329339	GOLGA4
chr10	92642970	92646389	1.53	6.49	-4.96	2.58e-06	0.000237	92689955	92692483	HHEX
chr3	57850761	57852850	0.24	5.57	-5.33	2.59e-06	0.000238	57860760	57929126	SLMAP
chr8	60804637	60807363	2.16	6.64	-4.47	2.61e-06	0.000239	60850737	60852639	CHD7
chr7	24365991	24368422	-0.16	5.52	-5.68	2.61e-06	0.000239	24285107	24291824	NPY
chr10	96959904	96961625	-0.16	5.5	-5.66	2.62e-06	0.000239	96949223	96958515	LCOR
chr12	21640630	21644314	1.79	6.83	-5.04	2.63e-06	0.000239	21635342	21638538	LDHB
chr2	188468682	188475152	3.14	8.19	-5.05	2.63e-06	0.000239	188522738	188584309	GULP1
chr13	112737112	112738371	-0.16	5.58	-5.74	2.64e-06	0.00024	112745449	112754693	ATP11A-AS1
chr8	35518700	35520834	-0.16	5.66	-5.82	2.65e-06	0.000241	35544392	35794662	UNC5D
chr16	67038781	67040239	-0.16	5.33	-5.49	2.66e-06	0.000241	67036427	67066962	CBFB
chr5	119112427	119114090	0.55	5.56	-5.01	2.66e-06	0.000242	119105223	119129332	DMXL1
chr15	90032453	90034074	-0.16	5.4	-5.56	2.67e-06	0.000242	90006755	90006841	MIR3174
chr6	76583531	76588475	-0.16	6.63	-6.79	2.69e-06	0.000243	76522451	76593623	LINC02540
chr2	148736110	148737906	0.23	5.56	-5.34	2.69e-06	0.000244	148753895	148762215	EPC2
chr3	196052154	196054058	-0.16	5.41	-5.57	2.7e-06	0.000244	196027183	196055214	TFRC
chr3	120774041	120777053	2.49	6.8	-4.32	2.7e-06	0.000244	120688597	120742993	RABL3
chr1	180497375	180500526	-0.16	6.14	-6.3	2.7e-06	0.000244	180288230	180502577	ACBD6
chr10	27515606	27518101	2.03	6.15	-4.12	2.72e-06	0.000245	27504619	27537966	RAB18
chr21	39268017	39269396	-0.16	5.39	-5.55	2.73e-06	0.000245	39187246	39264941	BRWD1
chr8	97717417	97718695	-0.16	5.38	-5.54	2.73e-06	0.000246	97706412	97719087	MTDH
chr19	34226555	34230185	1.75	6.55	-4.8	2.74e-06	0.000246	34221350	34227617	LSM14A
chr5	64769308	64775512	2.25	7.36	-5.11	2.74e-06	0.000246	64773852	64789020	CWC27
chr8	42514162	42515236	0.24	5.42	-5.18	2.76e-06	0.000247	42472249	42502628	SLC20A2
chr7	131432519	131435515	1.35	6.21	-4.86	2.76e-06	0.000247	131463276	131490539	MKLN1
chr2	32439389	32443311	2.26	6.81	-4.55	2.76e-06	0.000247	32443426	32449185	BIRC6
chr9	121196637	121201605	2.16	7.18	-5.02	2.79e-06	0.000249	121178133	121201869	RAB14
chr2	152674105	152675908	1.04	5.65	-4.61	2.79e-06	0.000249	152663131	152663855	PRPF40A
chr9	27570430	27571718	-0.16	5.41	-5.58	2.8e-06	0.00025	27546555	27573448	C9orf72
chr5	16839724	16841059	-0.16	5.36	-5.53	2.82e-06	0.000251	16702977	16916527	MYO10
chr2	23885935	23887994	0.23	5.63	-5.4	2.82e-06	0.000251	23856009	23867887	ATAD2B
chr4	92525613	92526884	0.78	5.67	-4.89	2.85e-06	0.000253	92304657	93772498	GRID2
chr8	73059311	73061958	2.28	6.83	-4.55	2.86e-06	0.000254	73031613	73038804	TERF1
chr5	168563801	168565720	1.69	6.4	-4.71	2.87e-06	0.000254	168557611	168566064	PANK3
chr7	92731937	92733317	-0.16	5.37	-5.53	2.87e-06	0.000254	92671235	92725710	CDK6
chr5	72303738	72306522	-0.16	5.33	-5.49	2.87e-06	0.000254	72238025	72307962	MRPS27
chr8	42445082	42445851	-0.16	5.36	-5.52	2.88e-06	0.000254	42439467	42460168	SLC20A2
chr16	75149582	75151728	1.49	6.19	-4.7	2.93e-06	0.000259	75149051	75169326	ZFP1
chr3	179619333	179621153	-0.16	5.5	-5.66	2.94e-06	0.000259	179618227	179624100	NDUFB5
chr11	75907654	75909297	-0.16	5.63	-5.79	2.95e-06	0.00026	75911979	75916784	UVRAG
chr1	150647582	150648741	-0.16	5.31	-5.47	2.95e-06	0.00026	150621251	150629596	ENSA
chr3	44613996	44615428	-0.16	5.36	-5.52	2.96e-06	0.00026	44617128	44624797	ZNF197-AS1
chr10	15856618	15858194	0.24	5.44	-5.2	2.97e-06	0.000261	15778170	15860498	MINDY3
chr16	19572100	19574142	1.01	5.81	-4.8	2.98e-06	0.000261	19575098	19582085	VPS35L
chr7	86945827	86946725	-0.16	5.49	-5.65	2.98e-06	0.000262	86880016	86945046	KIAA1324L
chr5	179728693	179730498	1.49	6.15	-4.66	3.01e-06	0.000264	179726705	179729649	CANX
chr2	54520795	54522222	0.81	5.79	-4.98	3.04e-06	0.000266	54515744	54528715	SPTBN1
chr7	105779694	105781463	1.27	5.89	-4.61	3.06e-06	0.000267	105613733	105691637	ATXN7L1
chr1	220578291	220580288	-0.16	5.38	-5.54	3.06e-06	0.000268	220528850	220579508	MARK1
chr4	137528910	137531155	-0.16	5.31	-5.48	3.07e-06	0.000268	137521507	137529576	PCDH18
chr6	105008756	105013700	2.25	7.3	-5.05	3.11e-06	0.000271	104957107	105083332	LIN28B
chr6	87226744	87231826	2.4	7.66	-5.26	3.12e-06	0.000272	87233524	87255049	ZNF292
chr12	133011847	133015783	2.12	6.54	-4.42	3.12e-06	0.000272	133004404	133012127	ZNF26
chr9	97178611	97180710	0.55	5.52	-4.97	3.13e-06	0.000272	97195351	97197687	ANKRD18CP
chr6	93811918	93816047	-0.16	6.61	-6.77	3.14e-06	0.000272	93720163	93745615	TSG1
chr6	111498146	111504006	2.23	6.74	-4.5	3.14e-06	0.000272	111484652	111576590	TRAF3IP2-AS1
chr4	26395069	26401355	2.55	7.96	-5.41	3.15e-06	0.000273	26420570	26424994	RBPJ
chr7	38832386	38833594	-0.16	5.36	-5.52	3.16e-06	0.000273	38795492	38831346	VPS41
chr14	89424681	89427149	1.63	6.36	-4.73	3.17e-06	0.000274	89417354	89419793	FOXN3-AS1
chr19	48194730	48196599	1.18	5.93	-4.75	3.2e-06	0.000276	48203146	48218953	CARD8
chr2	180992560	180993939	1.37	5.79	-4.42	3.22e-06	0.000278	180984006	181062920	UBE2E3
chr4	143525132	143526072	-0.16	5.31	-5.47	3.24e-06	0.000279	143513472	143514635	SMARCA5-AS1
chr10	74190123	74191542	0.24	5.38	-5.14	3.24e-06	0.000279	74176770	74708934	ADK
chr10	96926998	96931699	3.28	7.72	-4.44	3.27e-06	0.000281	96949223	96958515	LCOR
chr12	116236922	116237797	0.78	5.57	-4.79	3.28e-06	0.000282	116009008	116237687	MED13L
chr7	105075264	105077000	-0.16	5.47	-5.64	3.31e-06	0.000284	105077116	105077808	KMT2E
chr1	35023802	35025288	0.53	5.54	-5.01	3.32e-06	0.000284	35014866	35031632	ZMYM6
chr2	159541369	159542664	1.49	6.15	-4.66	3.32e-06	0.000284	159437395	159555864	BAZ2B
chr4	153234868	153235817	0.64	5.47	-4.83	3.32e-06	0.000284	153222945	153276268	TRIM2
chr3	125499201	125500776	-0.16	5.29	-5.46	3.33e-06	0.000284	125476695	125504744	SNX4
chr20	5178631	5180079	-0.16	5.51	-5.67	3.33e-06	0.000285	5176102	5191354	CDS2
chr4	92440471	92444284	2	6.34	-4.34	3.34e-06	0.000285	92304657	93772498	GRID2
chr6	142196133	142199164	1.86	6.63	-4.76	3.34e-06	0.000285	142170346	142198781	VTA1
chr7	617292	618016	-0.16	5.32	-5.48	3.34e-06	0.000285	603185	608482	LOC101926963
chr21	37486697	37488039	1	5.71	-4.72	3.35e-06	0.000285	37486640	37505475	DYRK1A
chr1	39001876	39006620	2.25	7.42	-5.17	3.36e-06	0.000286	38991496	39004381	AKIRIN1
chr12	821304	822439	-0.16	5.38	-5.54	3.4e-06	0.000288	829925	861135	WNK1
chr18	55324425	55326242	1	5.74	-4.74	3.4e-06	0.000288	55234606	55322345	TCF4
chr4	76122199	76123886	-0.16	5.63	-5.79	3.43e-06	0.000291	76115438	76118437	NUP54
chr5	114367705	114369802	1.49	6.23	-4.74	3.46e-06	0.000293	114363107	114495946	KCNN2
chr10	20097229	20099345	-0.16	5.56	-5.72	3.47e-06	0.000293	20043320	20280357	PLXDC2
chr11	46103570	46105691	1.38	6.02	-4.64	3.47e-06	0.000293	45971348	46092205	PHF21A
chr15	26696384	26698235	1.22	6.11	-4.89	3.51e-06	0.000296	26543546	26716765	GABRB3
chr12	42356000	42358718	1.02	5.98	-4.96	3.53e-06	0.000297	42350203	42387522	PPHLN1
chr5	140538346	140539402	-0.16	5.33	-5.49	3.54e-06	0.000298	140537389	140539342	ANKHD1
chr15	77457166	77458205	-0.16	5.3	-5.46	3.55e-06	0.000299	77458217	77470946	HMG20A
chr5	94282643	94284995	1.92	6.44	-4.52	3.58e-06	0.000301	93621081	94111699	FAM172A
chr3	107626385	107627188	-0.16	5.34	-5.5	3.6e-06	0.000302	107645836	107728806	BBX
chr5	10416726	10417614	1.03	5.71	-4.68	3.61e-06	0.000303	10415599	10417451	MARCHF6
chr9	125116950	125118218	-0.16	5.44	-5.6	3.62e-06	0.000303	124952788	125143487	SCAI
chr14	69127712	69129310	-0.16	5.31	-5.47	3.63e-06	0.000304	69055210	69118194	DCAF5
chr10	110988777	110990778	-0.16	5.37	-5.53	3.63e-06	0.000304	110988926	110989013	MIR548E
chr7	138584677	138586097	0.78	5.59	-4.81	3.64e-06	0.000304	138554770	138573642	TRIM24
chr17	30513486	30517767	2.16	7.13	-4.97	3.65e-06	0.000305	30519699	30522609	GOSR1
chr3	139404007	139405788	0.24	5.42	-5.18	3.66e-06	0.000305	139419581	139579095	LOC100507291
chr3	108601302	108602586	-0.16	5.29	-5.45	3.67e-06	0.000305	108602833	108611284	DZIP3
chr3	133067515	133069176	-0.16	5.3	-5.46	3.67e-06	0.000305	133041786	133380157	TMEM108
chr2	38298047	38300111	-0.16	5.55	-5.71	3.68e-06	0.000305	38297931	38300318	ATL2
chr8	88290300	88291584	1.18	5.84	-4.66	3.68e-06	0.000305	88069233	88327206	MMP16
chr13	93251980	93259664	-0.16	5.51	-5.67	3.7e-06	0.000307	93226807	94408020	GPC6
chr15	48340259	48341106	-0.16	5.28	-5.44	3.72e-06	0.000308	48341136	48342062	DUT
chr13	28183344	28186106	1.16	5.85	-4.69	3.72e-06	0.000308	28139033	28295335	PAN3
chr10	70216075	70218861	-0.16	5.28	-5.44	3.72e-06	0.000308	70203589	70210250	PPA1
chr14	21495946	21497119	-0.16	5.31	-5.47	3.73e-06	0.000308	21492097	21492812	TOX4
chr2	55009866	55011136	-0.16	5.35	-5.51	3.73e-06	0.000308	54972187	55010449	RTN4
chr4	13397714	13399540	0.92	5.72	-4.8	3.74e-06	0.000308	13368501	13381594	RAB28
chr9	16694842	16696557	-0.16	5.5	-5.66	3.74e-06	0.000308	16579837	16705082	BNC2
chr3	32790594	32791729	-0.16	5.34	-5.5	3.75e-06	0.000309	32769665	32773512	CNOT10
chr15	24990510	24991486	1	5.67	-4.67	3.76e-06	0.000309	24986925	24986995	PWAR5
chr8	9900874	9902210	0.3	5.49	-5.2	3.78e-06	0.00031	9900058	9901937	LINC00599
chr6	57128445	57130547	0.81	5.87	-5.06	3.78e-06	0.00031	57152157	57154160	ZNF451
chr5	55471311	55472549	-0.16	5.28	-5.44	3.79e-06	0.00031	55441880	55468290	PLPP1
chr12	62301369	62302572	-0.16	5.34	-5.5	3.8e-06	0.000311	62305595	62325933	USP15
chr3	113724338	113727758	-0.16	6.47	-6.63	3.8e-06	0.000311	113721760	113724597	NAA50
chr11	106094531	106095775	0.78	5.65	-4.87	3.81e-06	0.000312	106091467	106098699	AASDHPPT
chr9	97220899	97222592	-0.16	5.41	-5.57	3.83e-06	0.000313	97156570	97221235	ANKRD18CP
chr1	81960612	81961951	-0.16	5.42	-5.59	3.86e-06	0.000315	81955767	81966435	ADGRL2
chr15	77054950	77057779	1.63	6.27	-4.64	3.87e-06	0.000315	77046030	77055934	TSPAN3
chr4	57021726	57024205	1.36	6.11	-4.75	3.9e-06	0.000318	57023227	57023751	POLR2B
chr8	120745905	120748128	2.1	6.47	-4.37	3.92e-06	0.000319	120761253	120776832	LOC101927543
chr2	130124018	130127020	-0.16	5.58	-5.74	3.94e-06	0.000321	130073535	130129222	POTEF
chr5	55338818	55341448	-0.16	5.32	-5.48	3.95e-06	0.000321	55327530	55343372	MTREX
chr3	139355044	139356824	1.53	6.16	-4.63	3.97e-06	0.000322	139357823	139358743	COPB2
chr2	48325164	48328154	1.63	6.39	-4.76	3.98e-06	0.000323	48314682	48379295	FOXN2
chr2	169632448	169633154	0.24	5.32	-5.09	3.99e-06	0.000324	169631437	169636241	PPIG
chr8	28923237	28924904	1.03	5.7	-4.67	4e-06	0.000324	28891316	29051898	HMBOX1
chr4	39772750	39775135	1.58	6.37	-4.79	4.01e-06	0.000324	39837012	39848561	PDS5A
chr6	4058621	4060281	0.53	5.68	-5.15	4.02e-06	0.000325	4060982	4062069	PRPF4B
chr17	68108691	68110629	0.23	5.3	-5.08	4.12e-06	0.000332	68102943	68115518	LINC00674
chr7	77853957	77856547	1.63	6.41	-4.78	4.13e-06	0.000332	77840180	77957222	PHTF2
chr12	45733173	45734780	-0.16	5.59	-5.75	4.13e-06	0.000332	45729916	45893918	ARID2
chr1	45977147	45978693	-0.16	5.32	-5.48	4.15e-06	0.000334	45959386	46011109	MAST2
chr6	62208079	62211143	-0.16	5.59	-5.75	4.17e-06	0.000335	61679961	62286225	KHDRBS2
chr2	171047504	171049306	-0.16	5.3	-5.47	4.2e-06	0.000337	171045231	171055129	TLK1
chr10	127383681	127384786	-0.16	5.25	-5.42	4.22e-06	0.000338	127248068	127272196	DOCK1
chr9	23708229	23709403	-0.16	5.37	-5.53	4.23e-06	0.000339	23701415	23735565	ELAVL2
chr5	65824140	65825305	-0.16	5.3	-5.46	4.24e-06	0.000339	65818721	65823237	NLN
chr2	88603726	88604969	-0.16	5.27	-5.43	4.25e-06	0.00034	88557854	88595857	EIF2AK3
chr8	102262824	102264990	-0.16	5.24	-5.4	4.25e-06	0.00034	102253946	102261986	UBR5
chr1	179147663	179151439	3.44	7.56	-4.12	4.28e-06	0.000341	179104048	179143089	ABL2
chr3	188227508	188229194	1.49	6.08	-4.59	4.3e-06	0.000343	188225405	188890671	LPP
chr4	163126233	163127890	-0.16	5.31	-5.47	4.3e-06	0.000343	163129120	163133642	NAF1
chr9	87542081	87543323	1.18	5.85	-4.67	4.3e-06	0.000343	87553454	87554459	DAPK1-IT1
chr6	15534158	15535662	-0.16	5.25	-5.41	4.31e-06	0.000343	15524112	15533547	DTNBP1
chr3	197099986	197100858	-0.16	5.27	-5.43	4.32e-06	0.000343	197080990	197085658	DLG1
chr3	131007437	131008581	-0.16	5.23	-5.39	4.34e-06	0.000345	130994070	131001342	ATP2C1
chr8	9646659	9647984	-0.16	5.34	-5.51	4.36e-06	0.000346	9670119	9681156	TNKS
chr1	149437395	149446090	1.86	6.57	-4.7	4.36e-06	0.000346	149475338	149556361	NBPF19
chr2	46742226	46750819	3.29	8.32	-5.03	4.38e-06	0.000347	46699295	46763129	SOCS5
chr1	232125794	232140992	3.15	9.21	-6.06	4.38e-06	0.000347	231925834	231945233	DISC1-IT1
chr8	67205448	67206800	0.23	5.27	-5.04	4.45e-06	0.000352	67199011	67207190	ARFGEF1
chr7	134790347	134795281	2.16	7.15	-4.99	4.47e-06	0.000353	134779715	134867975	CALD1
chr6	78976690	78977966	-0.16	5.24	-5.41	4.48e-06	0.000353	78940546	78982943	PHIP
chr7	141287407	141288258	-0.16	5.32	-5.48	4.5e-06	0.000354	141074393	141212764	TMEM178B
chr6	45261945	45262664	-0.16	5.23	-5.39	4.5e-06	0.000355	45197674	45197770	MIR586
chr5	116481242	116482214	-0.16	5.23	-5.39	4.52e-06	0.000356	116447688	116480279	SEMA6A
chr12	69265013	69266511	-0.16	5.38	-5.54	4.56e-06	0.000358	69273157	69273218	MIR1279
chr11	34936111	34937208	0.55	5.38	-4.83	4.56e-06	0.000358	34941837	34941920	MIR1343
chr12	27273177	27274691	-0.16	5.28	-5.45	4.57e-06	0.000359	27293628	27309197	STK38L
chr7	135586866	135587675	-0.16	5.26	-5.42	4.58e-06	0.000359	135597239	135601450	NUP205
chr15	73246704	73247655	-0.16	5.23	-5.39	4.67e-06	0.000365	73254717	73259111	NEO1
chr15	77399259	77400106	-0.16	5.41	-5.57	4.67e-06	0.000365	77252499	77420094	PEAK1
chr12	76427881	76429091	-0.16	5.46	-5.62	4.67e-06	0.000365	76369718	76423266	OSBPL8
chr12	45228604	45229852	-0.16	5.43	-5.6	4.68e-06	0.000365	45216120	45313512	ANO6
chr18	51172950	51174466	0.78	5.57	-4.79	4.68e-06	0.000365	51174552	51197320	MEX3C
chr12	62778433	62779555	-0.16	5.23	-5.39	4.69e-06	0.000365	62689750	62788484	PPM1H
chr5	146257285	146258227	-0.16	5.35	-5.52	4.73e-06	0.000368	146261383	146263519	RBM27
chr6	169702400	169705991	2.16	7.02	-4.86	4.75e-06	0.000369	169702190	169704856	C6orf120
chr12	112276654	112277417	0.23	5.26	-5.04	4.76e-06	0.00037	112249557	112273793	HECTD4
chr16	71747800	71750434	1.76	6.1	-4.34	4.78e-06	0.000371	71731883	71747396	AP1G1
chr8	119241330	119243565	1.49	6.13	-4.63	4.81e-06	0.000372	119221094	119246815	MAL2-AS1
chr8	117868145	117869489	1.47	5.81	-4.33	4.81e-06	0.000372	117822465	118110414	EXT1
chr16	1195946	1197146	-0.16	5.35	-5.51	4.82e-06	0.000373	1195029	1198934	CACNA1H
chr1	112690234	112691906	1.22	5.8	-4.59	4.85e-06	0.000375	112693905	112694584	MOV10
chr5	14372078	14373335	-0.16	5.25	-5.42	4.85e-06	0.000375	14387343	14387950	TRIO
chr15	42758501	42760129	0.81	5.83	-5.02	4.87e-06	0.000376	42723544	42737128	CDAN1
chr6	106310073	106315058	2.86	7	-4.14	4.9e-06	0.000378	106186540	106316208	ATG5
chr6	26648741	26649287	-0.16	5.27	-5.43	4.91e-06	0.000378	26636291	26651496	ZNF322
chr4	39855097	39857415	1.35	5.9	-4.55	4.91e-06	0.000378	39837012	39848561	PDS5A
chr10	114152532	114154116	-0.16	5.25	-5.42	4.92e-06	0.000378	114124929	114144602	CCDC186
chr13	110365191	110367294	1	5.63	-4.63	4.92e-06	0.000378	110340958	110341029	MIR8073
chr2	188305204	188307041	-0.16	5.35	-5.51	4.95e-06	0.00038	188297492	188297588	MIR561
chr12	79592574	79594102	1.49	6.1	-4.6	4.95e-06	0.00038	79584879	79596534	PAWR
chr13	52718834	52719781	-0.16	5.22	-5.38	4.95e-06	0.00038	52712716	52739352	CNMD
chr13	79524904	79526210	-0.16	5.26	-5.42	4.99e-06	0.000382	79518992	79520975	NDFIP2
chr19	1983605	1984544	0.3	5.36	-5.06	5.01e-06	0.000383	1985438	1988569	BTBD2
chr15	57481302	57483252	-0.16	5.42	-5.59	5.02e-06	0.000384	57376505	57550727	CGNL1
chr12	67307237	67309417	-0.16	6.35	-6.51	5.07e-06	0.000387	67298972	67314608	CAND1
chr15	43037055	43038561	1.22	5.78	-4.56	5.08e-06	0.000388	43021085	43037829	UBR1
chr17	36519019	36521203	1.85	6.2	-4.35	5.14e-06	0.000392	36511207	36514487	MYO19
chr10	31880277	31881453	-0.16	5.21	-5.37	5.18e-06	0.000395	31820444	31854180	ARHGAP12
chr6	143738559	143739748	-0.16	5.19	-5.35	5.18e-06	0.000395	143748928	143765665	PHACTR2
chr1	220543121	220544834	-0.16	5.5	-5.66	5.2e-06	0.000396	220528850	220579508	MARK1
chr13	49006689	49011255	1.53	6.32	-4.78	5.21e-06	0.000396	48976673	49209607	FNDC3A
chr9	69733297	69734663	0.55	5.54	-4.99	5.22e-06	0.000396	69731932	69734258	PTAR1
chr21	39265808	39266919	-0.16	5.2	-5.37	5.23e-06	0.000396	39187246	39264941	BRWD1
chr3	47079565	47085631	3.17	7.96	-4.79	5.26e-06	0.000398	47062160	47083946	SETD2
chr2	174160658	174169412	2.93	7.68	-4.75	5.26e-06	0.000398	174075409	174124315	OLA1
chr2	71437931	71439953	1.18	5.94	-4.76	5.3e-06	0.000401	71431183	71433566	ZNF638
chr10	86796670	86797791	-0.16	5.2	-5.36	5.3e-06	0.000401	86756650	86932838	BMPR1A
chr7	106275496	106282556	2.33	7.52	-5.2	5.32e-06	0.000402	106269155	106284632	NAMPT
chr11	10264085	10265066	-0.16	5.19	-5.35	5.36e-06	0.000404	9778667	10294207	SBF2
chr4	145095221	145097122	1.03	5.83	-4.81	5.37e-06	0.000405	145064572	145097382	ANAPC10
chr22	40519036	40520729	0.81	5.53	-4.72	5.39e-06	0.000405	40521800	40526707	MRTFA-AS1
chr3	176291498	176293752	1.53	6.25	-4.71	5.42e-06	0.000407	176515103	176515151	MIR7977
chr9	93361387	93363487	1.35	5.97	-4.63	5.43e-06	0.000408	93318199	93346414	C9orf129
chr3	170123502	170125178	0.23	5.37	-5.14	5.46e-06	0.000409	170117123	170128807	PHC3
chr3	43333682	43334912	1.03	5.65	-4.62	5.46e-06	0.000409	43332166	43340681	SNRK
chr17	30490005	30492461	1.63	6.37	-4.74	5.48e-06	0.000411	30477442	30522558	GOSR1
chr7	107916394	107918161	0.53	5.33	-4.8	5.5e-06	0.000412	107904668	107906369	DLD
chr3	52746250	52747427	-0.16	5.21	-5.37	5.51e-06	0.000412	52743228	52746114	NEK4
chr3	66251030	66252204	0.24	5.31	-5.07	5.52e-06	0.000412	66243203	66378927	SLC25A26
chr14	63536101	63536998	1.37	5.71	-4.34	5.52e-06	0.000412	63375761	63543298	PPP2R5E
chr5	134935887	134936931	-0.16	5.19	-5.35	5.52e-06	0.000412	134908830	134959095	PCBD2
chr11	92336280	92337751	0.92	5.54	-4.61	5.52e-06	0.000412	92352096	92896452	FAT3
chr7	152261873	152262695	-0.16	5.2	-5.36	5.52e-06	0.000412	152224122	152248019	KMT2C
chr6	107910230	107911553	0.53	5.33	-4.8	5.55e-06	0.000413	107906465	107909159	SEC63
chr3	65558746	65561470	1.75	6.33	-4.58	5.58e-06	0.000415	65470283	65549500	MAGI1
chr1	220235539	220237337	0.92	5.67	-4.75	5.6e-06	0.000416	220202276	220211377	RAB3GAP2
chr5	69425812	69427716	1	5.59	-4.59	5.61e-06	0.000416	69419386	69442061	MARVELD2
chr6	138603040	138605454	-0.16	5.41	-5.57	5.61e-06	0.000416	138422043	138572540	NHSL1
chr7	127824364	127826184	1.75	6.34	-4.59	5.63e-06	0.000417	127887912	128084850	SND1
chr3	149820597	149822596	1.78	6.13	-4.34	5.63e-06	0.000417	149817242	149902152	RNF13
chr6	161059119	161061651	-0.16	5.56	-5.72	5.65e-06	0.000417	161073329	161086444	MAP3K4
chr5	34219368	34222043	-0.16	5.27	-5.43	5.65e-06	0.000417	34175822	34218343	C1QTNF3
chr18	9179429	9180109	0.64	5.39	-4.75	5.66e-06	0.000418	9182382	9211621	ANKRD12
chr18	191525	197552	2.95	7.56	-4.61	5.72e-06	0.000422	196539	211268	USP14
chr3	31600759	31602694	-0.16	5.67	-5.83	5.73e-06	0.000422	31596806	31620296	STT3B
chr4	151519957	151523472	1.79	6.4	-4.61	5.74e-06	0.000423	151533012	151663628	FAM160A1
chr13	55547977	55554104	3.12	7.94	-4.81	5.74e-06	0.000423	55174454	55174548	MIR5007
chr21	36972380	36974502	-0.16	5.32	-5.49	5.77e-06	0.000424	36937185	36966639	HLCS
chr5	180329238	180330233	0.3	5.25	-4.96	5.79e-06	0.000425	180318844	180330934	GFPT2
chr2	175102460	175104097	-0.16	5.28	-5.44	5.79e-06	0.000425	175080263	175093254	ATF2
chr11	10080998	10082128	-0.16	5.2	-5.36	5.8e-06	0.000425	9993012	10044606	SBF2
chr2	187665867	187669115	1.65	6.29	-4.64	5.8e-06	0.000425	187496881	187565760	TFPI
chr7	131373616	131376796	1.96	6.76	-4.8	5.82e-06	0.000426	131322716	131328312	MKLN1-AS
chr17	2109364	2110047	-0.16	5.21	-5.37	5.84e-06	0.000428	2081916	2095112	SMG6
chr7	130586311	130587208	-0.16	5.32	-5.48	5.85e-06	0.000428	130506524	130564511	COPG2
chr4	40985886	40987023	-0.16	5.24	-5.4	5.86e-06	0.000428	40815313	41014385	APBB2
chr3	136658973	136677745	3.06	8.84	-5.79	5.87e-06	0.000428	136499766	136604473	STAG1
chr11	27495057	27497783	1.69	6.37	-4.68	5.88e-06	0.000428	27494418	27506769	LIN7C
chr3	107624531	107625580	-0.16	5.26	-5.42	5.88e-06	0.000428	107645836	107728806	BBX
chr6	163547209	163555009	3.1	8.17	-5.08	5.88e-06	0.000428	163566458	163571452	QKI
chr2	149574483	149575432	-0.16	5.27	-5.44	5.88e-06	0.000428	149587196	149848233	MMADHC-DT
chr8	71699748	71704027	2.76	7.16	-4.4	5.9e-06	0.000428	71530872	71592025	EYA1
chr13	49144727	49154427	3.36	7.64	-4.29	5.9e-06	0.000428	49110313	49209593	FNDC3A
chr4	40103730	40106403	3.19	6.96	-3.77	5.9e-06	0.000428	40102907	40155397	N4BP2
chr1	184462636	184465824	2.25	7.09	-4.84	5.92e-06	0.000429	184539993	184592248	C1orf21
chr5	64779145	64780184	-0.16	5.23	-5.4	5.95e-06	0.000431	64773852	64789020	CWC27
chr11	45934182	45935725	0.24	5.29	-5.05	5.95e-06	0.000431	45933831	45936507	PHF21A
chr11	74832543	74833516	0.53	5.32	-4.8	6e-06	0.000434	74848125	74852064	XRRA1
chr5	14366824	14368129	1.22	5.77	-4.55	6.09e-06	0.00044	14387343	14387950	TRIO
chr4	112878457	112880694	1.49	6.09	-4.59	6.1e-06	0.00044	112861065	113384221	ANK2
chr1	164612166	164615034	2.34	6.68	-4.34	6.11e-06	0.00044	164605193	164847071	PBX1
chr19	37643951	37645451	1.12	5.64	-4.52	6.11e-06	0.00044	37613749	37654729	ZFP30
chr2	25622249	25623191	-0.16	5.28	-5.44	6.12e-06	0.000441	25594889	25607293	DTNB
chr3	31756906	31757598	-0.16	5.19	-5.35	6.13e-06	0.000441	31716991	31721577	OSBPL10-AS1
chr11	117862108	117863403	-0.16	5.17	-5.33	6.14e-06	0.000441	117837851	117869190	FXYD6
chr10	12214930	12215991	-0.16	5.3	-5.46	6.14e-06	0.000441	12217414	12250529	CDC123
chr7	35851927	35855492	2.29	7.22	-4.93	6.15e-06	0.000442	35846845	35882559	SEPTIN7
chr4	93250143	93253236	1.86	6.72	-4.86	6.17e-06	0.000443	93238371	93306322	GRID2
chr12	116160601	116161517	-0.16	5.19	-5.35	6.18e-06	0.000443	116148560	116148654	MIR620
chr12	7796081	7797881	0.78	5.51	-4.73	6.18e-06	0.000443	7789615	7795095	NANOG
chr7	90416029	90417052	-0.16	5.27	-5.43	6.19e-06	0.000443	90405581	90513402	LOC102723899
chr2	119367847	119370210	1.63	6.24	-4.61	6.21e-06	0.000444	119370217	119372500	DBI
chr1	38847137	38848211	-0.16	5.36	-5.52	6.21e-06	0.000444	38839349	38848074	RRAGC
chr19	15175734	15176712	-0.16	5.22	-5.38	6.29e-06	0.000449	15178390	15179220	NOTCH3
chr1	58661310	58668860	2.61	7.93	-5.32	6.31e-06	0.00045	58654751	58668483	MYSM1
chr18	46257183	46258846	1.18	5.72	-4.54	6.31e-06	0.00045	46326809	46450349	RNF165
chr5	79251297	79252995	1.18	5.74	-4.56	6.4e-06	0.000455	79236131	79327211	JMY
chr11	123080405	123081687	-0.16	5.26	-5.42	6.4e-06	0.000455	123073485	123083736	CLMP
chr12	116080041	116080900	0.64	5.4	-4.76	6.4e-06	0.000455	115959364	116096911	MED13L
chr2	188371822	188372830	1.18	5.8	-4.62	6.42e-06	0.000456	188139637	188384313	LINC01090
chr17	37297764	37298744	-0.16	5.19	-5.35	6.43e-06	0.000456	37084994	37299767	ACACA
chr7	5903648	5905592	1.89	6.08	-4.19	6.44e-06	0.000457	5902596	5910236	CCZ1
chr10	15253023	15254476	-0.16	5.21	-5.38	6.51e-06	0.000461	15214171	15248707	FAM171A1
chr17	78046088	78046979	-0.16	5.16	-5.32	6.51e-06	0.000461	78051067	78077779	TNRC6C
chr8	63206903	63210678	1.49	6.17	-4.67	6.53e-06	0.000462	63187530	63189042	YTHDF3
chr11	36500066	36501097	-0.16	5.15	-5.32	6.55e-06	0.000462	36490377	36496510	TRAF6
chr13	45224132	45227097	-0.16	5.28	-5.44	6.58e-06	0.000464	45219353	45267363	GTF2F2
chr1	213057748	213058402	-0.16	5.2	-5.36	6.59e-06	0.000464	213051255	213274773	RPS6KC1
chr2	72601291	72602188	-0.16	5.31	-5.47	6.6e-06	0.000465	72499928	72515754	EXOC6B
chr5	50757639	50758614	-0.16	5.19	-5.35	6.6e-06	0.000465	50667893	50842342	PARP8
chr12	32644576	32645640	-0.16	5.21	-5.37	6.61e-06	0.000465	32679200	32745552	DNM1L
chr4	86632058	86637819	2.55	7.36	-4.81	6.7e-06	0.000471	86635252	86815149	PTPN13
chr2	167339758	167340735	-0.16	5.19	-5.35	6.73e-06	0.000472	167248682	167259749	XIRP2
chr11	46502303	46503055	-0.16	5.2	-5.36	6.73e-06	0.000472	46490998	46495511	AMBRA1
chr1	90942071	90948834	2.79	8.26	-5.48	6.75e-06	0.000473	90937883	90940120	ZNF644
chr9	77942413	77943912	-0.16	5.32	-5.48	6.76e-06	0.000474	77797528	78030604	GNAQ
chr18	79921661	79922994	-0.16	5.15	-5.31	6.77e-06	0.000474	79903894	79915961	SLC66A2
chr4	93103814	93105664	-0.16	5.23	-5.39	6.82e-06	0.000477	93084986	93774553	GRID2
chr5	94180148	94182570	-0.16	5.94	-6.1	6.86e-06	0.000479	93621081	94111699	FAM172A
chr5	36989522	36991592	-0.16	5.18	-5.34	6.86e-06	0.000479	36995150	37000506	NIPBL
chr4	153310517	153314147	1.79	6.37	-4.57	6.89e-06	0.00048	153307792	153308717	ANXA2P1
chr10	63405267	63406451	0.78	5.56	-4.78	6.89e-06	0.00048	63372957	63373048	MIR1296
chr14	31149616	31154835	2.16	6.94	-4.78	6.9e-06	0.000481	31135542	31136838	HECTD1
chr13	40649836	40651440	2.14	6.58	-4.43	6.91e-06	0.000481	40560767	40665877	FOXO1
chr6	56837582	56839055	0.23	5.54	-5.31	6.92e-06	0.000481	56670488	56843146	DST
chr2	99443824	99444851	-0.16	5.21	-5.37	6.93e-06	0.000482	99431801	99438817	REV1
chr12	78874273	78875541	-0.16	5.35	-5.51	6.95e-06	0.000482	78868772	79217517	SYT1
chr13	112811716	112815969	2.33	7.18	-4.85	6.98e-06	0.000484	112836243	112855928	ATP11A
chr1	164762524	164764189	-0.16	5.5	-5.66	6.99e-06	0.000485	164772912	164807571	PBX1
chr2	55284589	55286930	-0.16	5.6	-5.76	7e-06	0.000485	55282319	55284472	PRORSD1P
chr1	212740335	212742604	1.75	6.32	-4.57	7.01e-06	0.000485	212686417	212699840	BATF3
chr7	92792721	92794151	-0.16	5.15	-5.32	7.01e-06	0.000485	92604921	92833917	CDK6
chr8	115628016	115629040	-0.16	5.16	-5.33	7.01e-06	0.000485	115413814	115620070	TRPS1
chr10	72574382	72575250	0.23	5.2	-4.98	7.05e-06	0.000487	72367340	72551198	MICU1
chr16	69797311	69798081	-0.16	5.2	-5.36	7.07e-06	0.000487	69798865	69940178	WWP2
chr6	4009324	4010866	-0.16	5.14	-5.3	7.07e-06	0.000487	4021267	4064982	PRPF4B
chr12	103983679	103984546	-0.16	5.15	-5.31	7.08e-06	0.000487	103979955	103987244	TDG
chr9	111390353	111391783	1.89	6.06	-4.17	7.09e-06	0.000488	111361886	111371788	ECPAS
chr3	36998863	37000855	1.22	5.82	-4.6	7.11e-06	0.000489	36994227	37011836	MLH1
chr3	138247505	138248746	0.53	5.41	-4.88	7.12e-06	0.000489	138238020	138246472	ARMC8
chr15	38286824	38288733	1.9	6.34	-4.44	7.12e-06	0.000489	38253181	38339771	SPRED1
chr7	23197671	23198574	-0.16	5.18	-5.34	7.14e-06	0.000489	23199424	23200824	NUP42
chr7	7248847	7250471	1.18	5.88	-4.7	7.14e-06	0.000489	7255154	7278071	LOC101927354
chr16	13113582	13114415	-0.16	5.18	-5.34	7.14e-06	0.000489	13082380	13235293	SHISA9
chr2	206295044	206297324	-0.16	5.63	-5.79	7.15e-06	0.00049	206292063	206314424	ZDBF2
chr2	111868179	111870608	1.75	6.42	-4.66	7.16e-06	0.00049	111872690	111880825	ANAPC1
chr7	23498692	23499541	0.23	5.18	-4.96	7.2e-06	0.000492	23505316	23505885	TRA2A
chr2	117962656	117963767	0.55	5.31	-4.76	7.21e-06	0.000492	117948033	117952412	CCDC93
chr19	53406174	53407801	-0.16	5.34	-5.5	7.24e-06	0.000494	53395173	53430413	ZNF765
chr4	164891690	164892380	-0.16	5.37	-5.53	7.32e-06	0.000499	164877242	164898965	APELA
chr3	52548569	52550148	1	5.59	-4.6	7.32e-06	0.000499	52536605	52579237	SMIM4
chr3	172220398	172221748	1.35	5.84	-4.5	7.37e-06	0.000502	172306936	172310927	FNDC3B
chr3	140976088	140977164	-0.16	5.13	-5.29	7.43e-06	0.000505	140973666	140976463	SLC25A36
chr1	77636335	77640702	2.16	6.99	-4.83	7.5e-06	0.00051	77564506	77632876	ZZZ3
chrX	133343057	133343960	-0.16	5.15	-5.31	7.51e-06	0.00051	133300103	133415489	GPC4
chr1	150669750	150671472	1.18	5.72	-4.54	7.52e-06	0.00051	150694512	150697108	GOLPH3L
chr12	51668007	51669156	-0.16	5.31	-5.47	7.52e-06	0.00051	51662818	51807429	SCN8A
chr2	62715103	62717968	1.12	6.28	-5.15	7.55e-06	0.000511	62707192	63045500	EHBP1
chr1	42813493	42814685	0.24	5.19	-4.95	7.56e-06	0.000512	42807052	42816804	SVBP
chr3	176300771	176303399	1.03	5.74	-4.72	7.57e-06	0.000512	176515103	176515151	MIR7977
chr3	3145851	3147011	-0.16	5.22	-5.38	7.63e-06	0.000515	3140540	3149023	TRNT1
chr10	63508248	63510328	-0.16	5.38	-5.54	7.65e-06	0.000516	63521401	63625128	REEP3
chr15	41010943	41012577	1.53	6.02	-4.48	7.65e-06	0.000516	40985349	41005357	INO80
chr9	37928891	37930112	1	5.6	-4.6	7.66e-06	0.000516	37879400	37904353	SLC25A51
chr8	103045417	103046559	0.3	5.21	-4.92	7.68e-06	0.000517	103051117	103063270	ATP6V1C1
chr1	184541656	184543594	1.76	6.14	-4.37	7.68e-06	0.000517	184539993	184592248	C1orf21
chr3	161240291	161241113	-0.16	5.22	-5.38	7.7e-06	0.000518	161224930	161235331	NMD3
chr13	44562097	44563809	1.22	5.83	-4.61	7.71e-06	0.000518	44538326	44573345	TSC22D1
chr11	92451591	92453176	-0.16	5.35	-5.51	7.8e-06	0.000523	92355186	92524949	FAT3
chr7	131367491	131370205	1.75	6.27	-4.52	7.81e-06	0.000523	131322716	131328312	MKLN1-AS
chr17	67602947	67605763	2.31	6.51	-4.2	7.83e-06	0.000524	67553186	67693367	PITPNC1
chr5	75482104	75483470	1.49	5.96	-4.46	7.84e-06	0.000525	75371121	75506004	CERT1
chr5	113571897	113573198	-0.16	5.24	-5.4	7.85e-06	0.000525	113565719	113579666	YTHDC2
chr4	92676228	92677865	1.18	5.82	-4.64	7.97e-06	0.000533	92822949	93112247	GRID2
chr4	112863590	112865161	1.04	5.64	-4.6	7.98e-06	0.000533	112861065	113384221	ANK2
chr8	39036630	39040839	2.48	7.43	-4.96	7.99e-06	0.000533	39018615	39018683	SNORD38D
chr9	123003609	123004872	-0.16	5.26	-5.43	8e-06	0.000533	122990163	122996320	RABGAP1
chr7	74740481	74749966	-0.16	5.11	-5.27	8.07e-06	0.000537	74744344	74749452	GTF2I
chr1	220216137	220221878	2.37	7.48	-5.11	8.1e-06	0.000539	220202276	220211377	RAB3GAP2
chr11	76108117	76109890	1.98	6.15	-4.17	8.14e-06	0.00054	76115900	76141660	UVRAG
chr20	6019299	6021374	1.35	5.91	-4.57	8.14e-06	0.00054	6028271	6034555	CRLS1
chr9	26923684	26925699	1.03	5.57	-4.54	8.14e-06	0.00054	26905883	26923233	PLAA
chr1	85382688	85384109	0.23	5.23	-5.01	8.14e-06	0.00054	85321452	85404528	DDAH1
chr18	3455703	3459750	2.66	7.83	-5.17	8.16e-06	0.000541	3455414	3458411	TGIF1
chr3	47850546	47852073	-0.16	5.51	-5.67	8.2e-06	0.000543	47849555	47849629	MIR1226
chr6	47241423	47242658	-0.16	5.2	-5.36	8.23e-06	0.000545	47231532	47309905	TNFRSF21
chr7	150407563	150409043	1.89	6.03	-4.14	8.27e-06	0.000547	150405774	150410599	LOC728743
chr2	168611898	168614541	1.86	6.43	-4.57	8.28e-06	0.000547	168582943	168583018	MIR4774
chr1	35970703	35972662	1.35	5.81	-4.46	8.28e-06	0.000547	35966955	35973592	AGO3
chr13	100120616	100121948	0.24	5.17	-4.93	8.29e-06	0.000547	100102899	100530437	PCCA
chr8	73699622	73702208	1.18	5.65	-4.47	8.3e-06	0.000548	73420369	73738327	STAU2
chr3	126738616	126739800	0.55	5.33	-4.78	8.31e-06	0.000548	126730564	126960391	CHCHD6
chr1	28960208	28962078	0.64	5.34	-4.7	8.32e-06	0.000548	28987498	29072224	EPB41
chr12	45959819	45960703	-0.16	5.12	-5.28	8.32e-06	0.000548	45945084	45948530	SCAF11
chr7	128318021	128319065	0.53	5.29	-4.76	8.36e-06	0.00055	128310397	128321425	RBM28
chr1	243210923	243214533	-0.16	5.68	-5.84	8.46e-06	0.000556	243125164	243200814	CEP170
chr11	10141247	10142706	-0.16	5.31	-5.47	8.51e-06	0.000559	9838039	10193957	SBF2
chr12	125084073	125085181	-0.16	5.11	-5.28	8.52e-06	0.000559	125091013	125107154	AACS
chr2	160345395	160346439	-0.16	5.13	-5.29	8.55e-06	0.00056	160272152	160367526	RBMS1
chr17	32488004	32490554	1.22	5.98	-4.76	8.6e-06	0.000563	32486993	32491253	CDK5R1
chr12	97496582	97498200	1.37	5.69	-4.32	8.6e-06	0.000563	97494654	97560994	RMST
chr12	14394575	14395362	-0.16	5.11	-5.27	8.62e-06	0.000564	14394863	14424092	ATF7IP
chr1	193158693	193159975	-0.16	5.14	-5.3	8.64e-06	0.000565	193136503	193136583	MIR1278
chr1	155455568	155456810	-0.16	5.15	-5.31	8.65e-06	0.000565	155433178	155434262	POU5F1P4
chr18	12862800	12871108	3.02	8.3	-5.29	8.66e-06	0.000565	12859164	12864194	PTPN2
chr6	151242728	151245412	1.75	6.49	-4.73	8.68e-06	0.000566	151240374	151356773	AKAP12
chr3	179157631	179158968	-0.16	5.15	-5.31	8.7e-06	0.000567	179149527	179199179	PIK3CA
chr1	91009926	91010808	-0.16	5.2	-5.36	8.76e-06	0.00057	90915304	91021457	ZNF644
chr11	108190767	108192025	-0.16	5.11	-5.27	8.84e-06	0.000575	108158793	108170201	NPAT
chr4	78085146	78086698	-0.16	5.28	-5.45	8.86e-06	0.000576	78057604	78072107	FRAS1
chr14	45139412	45140773	0.53	5.25	-4.72	8.87e-06	0.000576	45136514	45137959	FANCM
chr20	32440620	32444215	0.81	5.4	-4.59	8.88e-06	0.000577	32432359	32434636	ASXL1
chr2	26227338	26229056	1.79	6.35	-4.55	8.91e-06	0.000577	26232202	26235304	HADHA
chr6	143681077	143684809	2.4	7.29	-4.88	8.91e-06	0.000577	143678173	143712336	PHACTR2
chr14	100433227	100433978	-0.16	5.2	-5.36	8.92e-06	0.000578	100476474	100530007	WDR25
chr1	21746898	21747889	-0.16	5.19	-5.36	8.94e-06	0.000579	21728612	21748191	USP48
chr5	39045676	39046966	0.78	5.38	-4.6	8.96e-06	0.00058	38940015	39074389	RICTOR
chr9	122240214	122242920	-0.16	5.5	-5.66	9.01e-06	0.000582	122241670	122247546	RBM18
chr9	96761356	96762838	-0.16	5.12	-5.29	9.03e-06	0.000583	96762947	96763693	ZNF510
chr13	51226231	51230176	2.64	7	-4.36	9.05e-06	0.000584	51222377	51227429	FAM124A
chr6	47606214	47607369	0.55	5.42	-4.87	9.07e-06	0.000585	47607872	47609513	CD2AP
chr17	16258118	16258723	-0.16	5.12	-5.28	9.09e-06	0.000586	16282014	16282088	MIR1288
chr8	65748226	65749255	-0.16	5.16	-5.32	9.1e-06	0.000586	65726910	65765672	PDE7A
chr14	55663939	55666021	-0.16	5.6	-5.76	9.11e-06	0.000586	55663343	55684576	KTN1
chr4	166814063	166817803	-0.16	6.11	-6.27	9.12e-06	0.000587	166734147	167102557	SPOCK3
chr16	30587124	30588024	0.23	5.22	-4.99	9.13e-06	0.000587	30578361	30585769	ZNF785
chr5	60969743	60972648	2	6.23	-4.23	9.15e-06	0.000588	60945335	61153026	NDUFAF2
chr12	837128	841279	2.01	6.91	-4.9	9.16e-06	0.000588	829925	861135	WNK1
chr8	40809289	40810536	-0.16	5.18	-5.34	9.19e-06	0.000589	40696996	40786782	ZMAT4
chr6	35671888	35673375	-0.16	5.11	-5.27	9.2e-06	0.000589	35664717	35664789	MIR5690
chr5	36940986	36944419	1.96	6.51	-4.55	9.21e-06	0.000589	36954968	36975897	NIPBL
chr14	73710142	73711996	1.35	5.88	-4.54	9.27e-06	0.000593	73711783	73714384	PNMA1
chr19	36814054	36817139	2.16	6.94	-4.78	9.28e-06	0.000593	36801209	36828115	ZNF790-AS1
chr14	93297358	93298553	-0.16	5.25	-5.41	9.32e-06	0.000595	93287672	93296158	BTBD7
chr1	89571085	89572665	1.75	6.22	-4.47	9.34e-06	0.000596	89568471	89584462	LRRC8B
chr5	140523305	140526022	1.08	5.86	-4.79	9.34e-06	0.000596	140524183	140539848	ANKHD1
chr14	102806181	102807841	1.78	5.89	-4.11	9.38e-06	0.000598	102830354	102906255	TRAF3
chr5	36986810	36988712	0.81	5.45	-4.64	9.44e-06	0.000601	36995150	37000506	NIPBL
chr9	69205752	69208352	1.67	6.21	-4.54	9.48e-06	0.000603	69205190	69221015	TJP2
chr17	67740964	67741936	-0.16	5.1	-5.26	9.53e-06	0.000606	67740669	67740799	SNORA38B
chr1	235247540	235252838	3.25	8.09	-4.84	9.55e-06	0.000606	235180139	235234492	ARID4B
chr9	6842676	6844098	-0.16	5.22	-5.38	9.55e-06	0.000606	6805617	6819079	KDM4C
chr12	4682205	4683016	-0.16	5.11	-5.27	9.56e-06	0.000606	4684980	4687233	NDUFA9
chr14	70576559	70581486	2.92	7.34	-4.42	9.59e-06	0.000608	70584665	70591814	MED6
chr12	32164045	32165677	-0.16	5.22	-5.38	9.59e-06	0.000608	32107332	32338809	BICD1
chr3	15727967	15729361	1.38	5.84	-4.46	9.63e-06	0.00061	15709668	15721122	ANKRD28
chr5	146131303	146142951	4.12	8.74	-4.62	9.68e-06	0.000612	146113911	146132626	LARS1
chr5	71519960	71522387	-0.16	5.15	-5.31	9.68e-06	0.000612	71522793	71567820	BDP1
chr18	8752074	8756262	2.25	7.05	-4.81	9.7e-06	0.000612	8782088	8810002	MTCL1
chr15	34977771	34979133	1.36	5.76	-4.4	9.7e-06	0.000612	34851782	34969742	AQR
chr7	86959504	86960624	0.92	5.52	-4.6	9.72e-06	0.000613	86942081	86965882	KIAA1324L
chr14	100026017	100026917	0.81	5.43	-4.62	9.78e-06	0.000616	100019576	100102347	EVL
chr2	71420531	71424256	2.2	6.77	-4.57	9.79e-06	0.000616	71418222	71435052	ZNF638
chr5	94310895	94312645	1.49	5.92	-4.42	9.79e-06	0.000616	94412974	94477184	KIAA0825
chr9	108927976	108929491	-0.16	5.28	-5.44	9.79e-06	0.000616	108868641	108933953	ELP1
chr2	207577350	207581041	2.34	6.49	-4.14	9.84e-06	0.000618	207576636	207597458	CREB1
chr6	167939481	167940906	1.2	5.53	-4.33	9.84e-06	0.000618	167932602	167947909	AFDN
chr21	31410922	31412585	-0.16	5.56	-5.72	9.88e-06	0.00062	31266296	31344279	TIAM1
chr9	112706149	112707542	0.53	5.33	-4.8	9.91e-06	0.000622	112687132	112718086	INIP
chr18	3891317	3893098	1.22	5.71	-4.49	9.93e-06	0.000622	3891932	3896658	DLGAP1-AS3
chr2	181010945	181015165	2.48	7.12	-4.64	9.95e-06	0.000623	180984006	181062920	UBE2E3
chr9	131921855	131923326	0.55	5.3	-4.74	9.96e-06	0.000623	132031886	132079645	MED27
chr5	7891966	7894832	1.86	6.58	-4.71	1e-05	0.000627	7891369	7893175	MTRR
chr1	196603659	196606235	2.55	6.93	-4.37	1.01e-05	0.000631	196227859	196608359	KCNT2
chr4	39581670	39583741	-0.16	5.27	-5.44	1.01e-05	0.000632	39551610	39583958	SMIM14
chr6	85610827	85612340	0.24	5.19	-4.95	1.02e-05	0.000633	85557978	85615234	SNX14
chr7	112280473	112282311	1.97	6.58	-4.61	1.02e-05	0.000633	112337728	112343023	ZNF277
chr3	196232247	196233458	-0.16	5.16	-5.32	1.02e-05	0.000634	196232404	196233423	SLC51A
chr8	92061018	92062724	-0.16	5.11	-5.28	1.02e-05	0.000636	91958924	92062963	RUNX1T1
chr6	97785832	97787168	-0.16	5.1	-5.26	1.02e-05	0.000636	97627071	97708917	LOC101927314
chr10	90887789	90889905	1.58	5.94	-4.36	1.04e-05	0.000644	90894773	90905638	RPP30
chr2	71368801	71369838	1	5.43	-4.43	1.04e-05	0.000644	71365429	71375335	ZNF638
chr2	159551969	159553571	0.92	5.48	-4.56	1.05e-05	0.000649	159437395	159555864	BAZ2B
chr10	20133565	20135377	1.93	6.28	-4.35	1.05e-05	0.00065	20043320	20280357	PLXDC2
chr1	19647615	19648535	0.78	5.4	-4.62	1.05e-05	0.000652	19647610	19658456	NBL1
chr18	57574112	57575401	-0.16	5.05	-5.21	1.05e-05	0.000652	57549569	57586391	FECH
chr2	10671801	10672870	-0.16	5.11	-5.27	1.05e-05	0.000652	10622023	10671690	NOL10
chr10	7329636	7331108	1.03	5.58	-4.55	1.05e-05	0.000652	7348142	7408745	SFMBT2
chr1	77994905	77995886	0.78	5.34	-4.56	1.05e-05	0.000652	78004935	78016299	DNAJB4
chr2	58234544	58237203	1.75	6.3	-4.55	1.06e-05	0.000652	58213505	58241259	FANCL
chr3	44572493	44574309	1.53	5.95	-4.41	1.06e-05	0.000652	44578223	44594311	ZNF660
chr4	92494541	92496460	1.16	5.77	-4.61	1.06e-05	0.000653	92304657	93772498	GRID2
chr17	5384457	5385877	-0.16	5.1	-5.26	1.06e-05	0.000653	5386104	5387132	NUP88
chr12	108663051	108665971	-0.16	5.87	-6.03	1.06e-05	0.000654	108648963	108658832	CORO1C
chr17	54934666	54935991	1.87	5.98	-4.11	1.07e-05	0.000658	54936413	54937484	TOM1L1
chr3	180962322	180963099	-0.16	5.06	-5.22	1.07e-05	0.000658	180957869	180970661	FXR1
chr4	39512427	39513456	-0.16	5.16	-5.33	1.08e-05	0.000661	39498788	39526557	UGDH
chr8	47911457	47915074	2.25	6.56	-4.31	1.09e-05	0.00067	47926833	47929169	PRKDC
chr15	64325077	64326011	-0.16	5.07	-5.23	1.09e-05	0.000672	64216591	64317007	CSNK1G1
chr7	22971366	22972190	-0.16	5.26	-5.42	1.1e-05	0.000673	22945983	22961316	FAM126A
chr4	145144676	145145940	0.81	5.38	-4.57	1.1e-05	0.000676	145146094	145150895	OTUD4
chr3	176349682	176352161	1.91	6.16	-4.25	1.11e-05	0.000677	176515103	176515151	MIR7977
chr7	4984880	4985693	0.64	5.29	-4.65	1.11e-05	0.000678	4984908	4989368	RNF216P1
chr3	50867536	50868551	0.53	5.41	-4.88	1.11e-05	0.000678	50675080	50675163	MIR4787
chr2	196918959	196920118	-0.16	5.12	-5.28	1.12e-05	0.000683	196835184	196926655	PGAP1
chr11	44155336	44158206	1.53	5.94	-4.4	1.12e-05	0.000684	44130043	44198120	EXT2
chr3	125579797	125581283	-0.16	5.33	-5.49	1.12e-05	0.000685	125528858	125595497	OSBPL11
chr2	32542828	32544079	-0.16	5.05	-5.21	1.13e-05	0.000685	32532153	32532246	MIR558
chr2	222571895	222573434	0.78	5.36	-4.58	1.13e-05	0.000686	222566899	222656092	FARSB
chr3	54683350	54684443	-0.16	5.04	-5.2	1.13e-05	0.000686	54632122	54639857	ESRG
chr2	108557106	108558315	0.92	5.49	-4.57	1.13e-05	0.000688	108534456	108673029	LIMS1
chr2	229847043	229848790	1.25	5.48	-4.22	1.13e-05	0.000688	229836863	229859282	TRIP12
chr12	95267540	95269908	2.27	6.07	-3.8	1.15e-05	0.000696	95269824	95282531	VEZT
chr10	122126328	122128592	2.07	6.7	-4.63	1.15e-05	0.000698	122126714	122254544	TACC2
chr9	113567641	113568371	-0.16	5.16	-5.32	1.15e-05	0.000698	113565076	113591794	RGS3
chr3	71204187	71206233	1.53	5.94	-4.4	1.16e-05	0.0007	71197882	71210869	FOXP1
chr3	23405644	23407772	1.53	5.9	-4.37	1.16e-05	0.0007	23499606	23532700	UBE2E2
chr9	94750788	94751547	0.24	5.1	-4.86	1.16e-05	0.000701	94759649	95087218	AOPEP
chr6	78988847	78990469	-0.16	5.34	-5.5	1.16e-05	0.000701	78940546	78982943	PHIP
chr6	76565980	76569110	2.33	7.02	-4.7	1.16e-05	0.000702	76522451	76593623	LINC02540
chr8	18852279	18858472	1.86	6.5	-4.64	1.16e-05	0.000702	18765449	18854374	PSD3
chr6	157131141	157132729	1.66	5.87	-4.21	1.16e-05	0.000702	157148624	157208688	ARID1B
chr2	26385056	26386500	-0.16	5.06	-5.22	1.17e-05	0.000702	26401920	26456711	DRC1
chr14	45130526	45131612	-0.16	5.36	-5.52	1.17e-05	0.000702	45121588	45131261	FKBP3
chr7	131370800	131371723	-0.16	5.08	-5.24	1.17e-05	0.000703	131322716	131328312	MKLN1-AS
chr12	71645350	71647437	1.49	5.94	-4.44	1.17e-05	0.000706	71632223	71633091	ZFC3H1
chr15	59092676	59093567	-0.16	5.03	-5.2	1.18e-05	0.000707	59093402	59095511	RNF111
chr11	76531372	76532233	-0.16	5.09	-5.25	1.18e-05	0.000708	76526479	76544868	EMSY
chr7	92300856	92302075	0.23	5.23	-5.01	1.18e-05	0.00071	92307359	92343117	ANKIB1
chr2	46719239	46724156	2.83	7.29	-4.45	1.19e-05	0.000712	46699295	46763129	SOCS5
chr6	35881988	35883272	1.53	5.76	-4.23	1.19e-05	0.000713	35869589	35870990	SRPK1
chr4	150861997	150863238	0.55	5.31	-4.75	1.19e-05	0.000714	150264689	150871425	LRBA
chr6	8036440	8037931	-0.16	5.11	-5.27	1.19e-05	0.000714	8015657	8041908	BLOC1S5
chr6	24407440	24425048	3.43	9.4	-5.97	1.2e-05	0.000715	24403192	24418561	MRS2
chr12	95250474	95254139	2.65	7	-4.36	1.2e-05	0.000715	95251945	95301172	VEZT
chr3	176303861	176316030	3.93	9.2	-5.27	1.2e-05	0.000716	176515103	176515151	MIR7977
chr6	13379499	13380980	0.55	5.23	-4.68	1.21e-05	0.000721	13357830	13408137	GFOD1
chr21	26072739	26078061	2.55	7.61	-5.07	1.21e-05	0.000722	26051160	26068338	APP
chr11	27684849	27686885	1.21	5.71	-4.5	1.21e-05	0.000723	27675726	27696422	BDNF-AS
chr1	200790299	200791193	-0.16	5.17	-5.34	1.21e-05	0.000723	200832108	200832834	CAMSAP2
chr16	69689143	69690545	1.58	5.68	-4.1	1.22e-05	0.000725	69690544	69692053	NFAT5
chr1	28512515	28513844	1.36	5.83	-4.47	1.22e-05	0.000726	28510077	28536026	RCC1
chr19	37561288	37563354	1.65	5.95	-4.3	1.22e-05	0.000727	37566678	37587316	ZNF571-AS1
chr7	39671422	39673202	1.16	5.66	-4.5	1.23e-05	0.000729	39686687	39706308	RALA
chr6	97774818	97775585	0.23	5.07	-4.85	1.23e-05	0.00073	97627071	97708917	LOC101927314
chr11	75914500	75915221	0.78	5.38	-4.6	1.23e-05	0.000731	75911979	75916784	UVRAG
chr3	50898070	50899976	1.69	5.95	-4.26	1.23e-05	0.000731	50675080	50675163	MIR4787
chr10	27120435	27122294	1.53	6	-4.47	1.24e-05	0.000734	27123547	27136337	YME1L1
chr7	105224455	105225544	-0.16	5.16	-5.32	1.24e-05	0.000735	105160301	105203732	SRPK2
chr3	65876473	65877519	-0.16	5.05	-5.21	1.25e-05	0.000736	65893816	65925297	MAGI1-AS1
chr16	11884209	11885992	1	5.61	-4.62	1.25e-05	0.000737	11880225	11886904	GSPT1
chr4	122920525	122921618	-0.16	5.31	-5.48	1.25e-05	0.000737	122892650	122922442	NUDT6
chr2	151825518	151827432	0.23	5.54	-5.32	1.25e-05	0.000737	151798797	151828421	ARL5A
chr1	227279659	227282914	2.48	7.31	-4.83	1.25e-05	0.000738	227199557	227254155	CDC42BPA
chr17	46246593	46247738	-0.16	5.24	-5.4	1.25e-05	0.000739	46029916	46225389	KANSL1
chr13	21415085	21421170	3.11	7.84	-4.73	1.26e-05	0.00074	21376519	21421107	ZDHHC20
chr3	17886840	17889042	1.96	6.41	-4.45	1.26e-05	0.00074	18013226	18041603	LOC339862
chr8	94737555	94738749	-0.16	5.06	-5.22	1.26e-05	0.000743	94739520	94744983	DPY19L4
chr20	3502480	3503127	0.53	5.21	-4.68	1.27e-05	0.000747	3471108	3615947	ATRN
chr15	41061951	41067683	3.16	7.81	-4.65	1.29e-05	0.000755	40983798	41069659	INO80
chr8	73738821	73740099	-0.16	5.03	-5.19	1.29e-05	0.000756	73549692	73738344	STAU2
chr5	72966001	72968279	-0.16	5.98	-6.15	1.29e-05	0.000757	72956071	73038123	FCHO2
chr4	48688900	48692694	1.86	6.51	-4.64	1.29e-05	0.000757	48620657	48681171	FRYL
chr10	87864865	87866909	1.16	5.59	-4.44	1.3e-05	0.000758	87864468	87894326	PTEN
chr11	78479301	78480147	-0.16	5.03	-5.19	1.3e-05	0.000758	78436189	78443759	NARS2
chr12	45291079	45292090	0.24	5.09	-4.85	1.3e-05	0.000759	45292683	45432351	ANO6
chr18	21781594	21786249	2.08	6.62	-4.54	1.3e-05	0.000759	21798084	21819558	MIB1
chr1	108701246	108702292	-0.16	5.09	-5.25	1.3e-05	0.00076	108697700	108699385	PRPF38B
chr15	39875571	39881971	3.66	8.52	-4.85	1.31e-05	0.000764	39801824	39894527	GPR176
chr5	90814105	90815586	1.44	5.71	-4.27	1.31e-05	0.000765	90822055	90848684	ADGRV1
chr8	9622337	9624890	2.26	6.3	-4.04	1.31e-05	0.000765	9615290	9707008	TNKS
chr4	39632330	39634016	-0.16	5.21	-5.37	1.32e-05	0.000769	39551785	39638230	SMIM14
chr8	127792132	127793832	-0.16	5.14	-5.3	1.32e-05	0.000769	127794526	128101256	PVT1
chr10	79284512	79285320	-0.16	5.08	-5.24	1.32e-05	0.000769	79285453	79316528	ZMIZ1
chr5	94318490	94324536	2.79	7.95	-5.16	1.32e-05	0.000769	94412974	94477184	KIAA0825
chrX	136874208	136874838	0.3	5.08	-4.79	1.33e-05	0.000769	136869192	136873982	RBMX
chr4	75700522	75701807	-0.16	5.25	-5.41	1.33e-05	0.000769	75658843	75724375	G3BP2
chr7	141698893	141700136	-0.16	5.32	-5.48	1.33e-05	0.00077	141661930	141701615	DENND11
chr20	37052088	37053407	-0.16	5.13	-5.29	1.33e-05	0.00077	37056160	37068055	RBL1
chr3	49171859	49172826	0.24	5.16	-4.92	1.33e-05	0.00077	49172713	49174966	KLHDC8B
chr9	23693643	23694321	-0.16	5.02	-5.18	1.34e-05	0.000773	23671788	23672399	LOC101929563
chr10	74865347	74866101	0.23	5.42	-5.2	1.34e-05	0.000773	74842883	74970271	KAT6B
chr14	60253806	60265884	2.96	8.3	-5.34	1.34e-05	0.000775	60256762	60283147	PPM1A
chr16	24920284	24921190	-0.16	5.05	-5.21	1.34e-05	0.000775	24919414	24931023	ARHGAP17
chr4	139354153	139357390	2.01	6.67	-4.65	1.35e-05	0.000777	139351535	139359857	NAA15
chr9	78013025	78016692	1.86	6.44	-4.58	1.35e-05	0.000779	77797528	78030604	GNAQ
chr7	105114809	105115937	-0.16	5.04	-5.2	1.35e-05	0.000779	105109040	105110867	KMT2E
chr17	62574230	62574854	-0.16	5.04	-5.2	1.35e-05	0.000779	62572847	62576728	TLK2
chr4	82423628	82424851	-0.16	5.35	-5.52	1.36e-05	0.00078	82424625	82429397	HNRNPDL
chr17	35621261	35626550	2.21	7.15	-4.94	1.36e-05	0.000781	35621275	35670898	AP2B1
chr3	16677025	16678469	-0.16	5.16	-5.33	1.36e-05	0.000782	16596750	16670306	DAZL
chr11	119065795	119067047	-0.16	5.08	-5.24	1.36e-05	0.000782	119067692	119081978	VPS11
chr6	70459771	70462251	1.18	5.92	-4.74	1.36e-05	0.000782	70482133	70504960	FAM135A
chr17	38320422	38321269	0.81	5.3	-4.49	1.37e-05	0.000784	38325610	38343810	GPR179
chr7	130201851	130203226	0.3	5.09	-4.79	1.37e-05	0.000786	130166078	130205348	TMEM209
chr19	15118621	15119943	-0.16	5.18	-5.34	1.37e-05	0.000786	15115885	15118015	ILVBL
chr3	23232923	23233558	-0.16	5.01	-5.17	1.37e-05	0.000786	23208700	23270989	UBE2E2
chr3	66376718	66377972	0.55	5.33	-4.78	1.38e-05	0.000791	66380225	66404410	LRIG1
chr12	14480529	14481603	-0.16	5.02	-5.18	1.39e-05	0.000792	14478336	14481906	ATF7IP
chr7	71598854	71601066	1.63	6.01	-4.38	1.39e-05	0.000795	71779492	71810495	CALN1
chr12	27293099	27293912	-0.16	5.18	-5.34	1.4e-05	0.000796	27293628	27309197	STK38L
chr3	56656211	56657306	1.01	5.37	-4.36	1.4e-05	0.000798	56620545	56664331	TASOR
chr5	60825481	60826772	0.81	5.31	-4.5	1.4e-05	0.000799	60764230	60843538	ELOVL7
chr7	122097431	122098575	-0.16	5.16	-5.32	1.4e-05	0.000799	122075647	122086153	AASS
chr10	51143348	51144420	-0.16	5.17	-5.33	1.41e-05	0.000802	51074570	52062856	PRKG1
chr14	95891169	95895520	2.51	6.62	-4.11	1.41e-05	0.000804	95876819	95923055	TUNAR
chrY	14562925	14563786	1.65	5.79	-4.14	1.41e-05	0.000804	14524574	14843647	NLGN4Y
chr1	45834731	45836242	1.36	5.83	-4.47	1.42e-05	0.000806	45803612	46036122	MAST2
chr1	214432360	214433889	-0.16	5.11	-5.27	1.42e-05	0.000806	214372246	214376406	PTPN14
chr6	87244387	87245532	-0.16	5.22	-5.38	1.42e-05	0.000808	87233524	87255049	ZNF292
chr5	94143741	94145544	-0.16	5.19	-5.35	1.42e-05	0.000808	93621081	94111699	FAM172A
chr1	21120201	21121743	-0.16	5.13	-5.3	1.43e-05	0.000808	21064531	21111610	EIF4G3
chr3	109359863	109360663	-0.16	5.07	-5.24	1.43e-05	0.000811	109326141	109337572	DPPA4
chr9	96844947	96845939	-0.16	5.01	-5.17	1.44e-05	0.000812	96816991	96853072	ZNF782
chr18	74592965	74597349	2.17	6.53	-4.36	1.44e-05	0.000812	74593201	74597569	LINC00909
chr2	32074826	32075535	-0.16	5	-5.16	1.44e-05	0.000812	32066002	32154720	SPAST
chr11	86261528	86262648	0.92	5.4	-4.48	1.45e-05	0.000816	86263945	86268530	EED
chr17	50984259	50985482	-0.16	5.06	-5.22	1.45e-05	0.000819	50976600	50982672	SPAG9
chr6	114325849	114326546	-0.16	5.04	-5.2	1.45e-05	0.00082	114055586	114343045	HS3ST5
chr8	55891122	55893203	1.36	5.75	-4.39	1.45e-05	0.00082	55902723	55902855	SNORA1B
chr14	102786648	102787124	-0.16	5.04	-5.2	1.46e-05	0.000821	102777618	102871953	TRAF3
chr22	31229693	31230382	0.55	5.17	-4.61	1.46e-05	0.000821	31212298	31280080	LIMK2
chr13	21397910	21399078	-0.16	5.23	-5.39	1.46e-05	0.000824	21376515	21390254	ZDHHC20
chr1	167364144	167365397	-0.16	5.02	-5.19	1.47e-05	0.000824	167371980	167427342	POU2F1
chrY	13430255	13432769	2.49	6.74	-4.25	1.47e-05	0.000825	13393152	13479504	UTY
chr21	15751975	15752634	-0.16	5.08	-5.24	1.48e-05	0.000832	15773256	15818729	USP25
chr2	167313115	167318160	2.07	6.83	-4.77	1.48e-05	0.000832	167248682	167259749	XIRP2
chr5	65781481	65783613	1.49	5.94	-4.44	1.49e-05	0.000835	65781416	65823328	NLN
chr3	143979498	143989947	2.8	7.9	-5.11	1.49e-05	0.000835	143973608	143992367	DIPK2A
chr8	28500012	28501801	1	5.75	-4.76	1.5e-05	0.000837	28505116	28505182	MIR4288
chr21	33356172	33357946	0.81	5.32	-4.51	1.5e-05	0.000837	33325005	33343604	IFNAR1
chr1	161793075	161794878	-0.16	5.22	-5.38	1.5e-05	0.000837	161766320	161964070	ATF6
chr12	71624084	71625730	-0.16	5.13	-5.3	1.5e-05	0.000837	71615071	71619965	ZFC3H1
chr2	159422225	159423169	-0.16	5.04	-5.2	1.5e-05	0.000838	159400599	159419867	BAZ2B
chr18	21772531	21774307	-0.16	5.39	-5.55	1.5e-05	0.00084	21798084	21819558	MIB1
chr15	25364002	25365737	2.18	6.18	-4	1.51e-05	0.00084	25354407	25357575	UBE3A
chr1	201747903	201749047	-0.16	5.18	-5.34	1.51e-05	0.000841	201739868	201826969	NAV1
chr5	115523620	115529657	2.74	7.74	-5.01	1.51e-05	0.000843	115520908	115544775	FEM1C
chr12	5162966	5164469	1.49	5.82	-4.33	1.51e-05	0.000843	5234418	5240105	LINC02443
chr12	51678285	51679189	-0.16	4.99	-5.15	1.52e-05	0.000843	51686423	51745948	SCN8A
chr3	107611682	107613365	2.27	6.25	-3.98	1.52e-05	0.000844	107599313	107805858	BBX
chr3	44809857	44811673	1	5.75	-4.75	1.52e-05	0.000844	44814971	44853254	KIF15
chr15	90738165	90740191	1.86	6.31	-4.44	1.52e-05	0.000844	90747390	90749960	BLM
chr2	156194502	156195284	-0.16	5.14	-5.3	1.52e-05	0.000844	156022686	156254905	LINC01876
chr17	32792643	32793829	-0.16	5.05	-5.21	1.53e-05	0.000848	32727587	32760396	MYO1D
chr10	120853827	120860950	3.22	7.73	-4.51	1.53e-05	0.000848	120852616	120909520	WDR11
chr1	32757471	32759066	-0.16	5.08	-5.24	1.53e-05	0.000849	32754021	32774970	KIAA1522
chr3	188354755	188357092	-0.16	5.41	-5.57	1.54e-05	0.000851	188341663	188609279	LPP
chr11	95914345	95917321	2.05	6.36	-4.3	1.54e-05	0.000851	95835336	95913077	MTMR2
chr1	34169260	34170845	0.81	5.28	-4.47	1.56e-05	0.000859	34166883	34219131	C1orf94
chr13	49706743	49710739	1.67	6.51	-4.84	1.56e-05	0.000863	49701210	49705752	KPNA3
chr15	56989328	56994876	3.21	7.81	-4.61	1.57e-05	0.000866	57063748	57092023	TCF12
chr12	21634390	21635999	-0.16	5.73	-5.89	1.57e-05	0.000866	21556914	21635644	GYS2
chr1	229661899	229662971	-0.16	4.97	-5.13	1.57e-05	0.000866	229650847	229659126	URB2
chr2	45531731	45532468	-0.16	5.02	-5.18	1.57e-05	0.000866	45418455	45549072	SRBD1
chr6	35883917	35885487	1.49	5.82	-4.33	1.57e-05	0.000866	35874240	35895719	SRPK1
chr18	56621187	56623514	2.34	6.47	-4.13	1.58e-05	0.000868	56602898	56614491	TXNL1
chr14	73011673	73012616	0.24	5.19	-4.95	1.58e-05	0.00087	72969451	73027106	ZFYVE1
chr17	27497322	27498825	0.78	5.43	-4.65	1.59e-05	0.000873	27472013	27582935	KSR1
chr3	121536655	121539654	2.16	6.88	-4.72	1.61e-05	0.000882	121521571	121533210	POLQ
chr10	101667888	101669396	-0.16	5.18	-5.34	1.61e-05	0.000882	101673565	101676714	FBXW4
chr6	154504446	154505982	0.8	5.22	-4.42	1.61e-05	0.000883	154159828	154510114	CNKSR3
chr13	40970416	40972707	-0.16	5.04	-5.2	1.61e-05	0.000884	40933352	40982225	ELF1
chr1	85685529	85686233	-0.16	5.03	-5.19	1.62e-05	0.000887	85649417	85708433	ZNHIT6
chr19	12025114	12027486	2.07	6.51	-4.44	1.62e-05	0.000887	12016548	12018677	ZNF433
chr15	66519430	66520484	-0.16	5.1	-5.26	1.63e-05	0.000888	66520508	66528933	ZWILCH
chr10	86910854	86911762	0.53	5.42	-4.89	1.63e-05	0.000889	86943871	86944571	MMRN2
chr4	84637452	84638537	0.92	5.33	-4.41	1.63e-05	0.000891	84672291	84682948	WDFY3
chr5	84173967	84175883	-0.16	5.19	-5.35	1.64e-05	0.000892	84106660	84181242	EDIL3
chr8	70343102	70344110	-0.16	5.04	-5.2	1.64e-05	0.000896	70112070	70402079	NCOA2
chr9	77926529	77928495	1.38	5.97	-4.59	1.65e-05	0.000896	77797528	78030604	GNAQ
chr11	3696439	3697810	1.55	5.7	-4.15	1.65e-05	0.000897	3695471	3697260	NUP98
chr7	65931201	65933497	1	5.39	-4.39	1.65e-05	0.000897	65964146	65967908	GUSB
chr3	107617894	107619170	-0.16	4.97	-5.13	1.66e-05	0.000899	107599313	107805858	BBX
chr6	149369893	149371974	1.91	6.28	-4.37	1.66e-05	0.0009	149397692	149409617	TAB2
chr14	61779746	61780896	0.81	5.35	-4.54	1.66e-05	0.0009	61762420	61796428	SNAPC1
chr18	62919113	62920914	-0.16	5.64	-5.8	1.66e-05	0.000901	62906287	62941910	PHLPP1
chr10	22697226	22698037	1.47	5.63	-4.16	1.66e-05	0.000902	22537015	22714108	PIP4K2A
chr2	152460353	152461160	-0.16	4.98	-5.15	1.67e-05	0.000904	152578621	152607653	FMNL2
chr15	24969086	24970610	-0.16	5.45	-5.61	1.67e-05	0.000904	24978583	24991753	SNHG14
chr20	45795308	45796859	1.35	5.7	-4.35	1.68e-05	0.000911	45793965	45811427	DNTTIP1
chr4	78082889	78084828	1.03	5.72	-4.69	1.68e-05	0.000911	78057604	78072107	FRAS1
chr3	150542598	150543368	-0.16	4.97	-5.13	1.69e-05	0.000911	150541998	150546496	SERP1
chr8	130294677	130296404	1.35	5.54	-4.19	1.69e-05	0.000912	130152764	130340937	ASAP1
chr4	183237591	183239862	2.07	6.53	-4.47	1.69e-05	0.000913	183233628	183240634	WWC2-AS1
chr6	87245987	87247616	1.49	5.9	-4.41	1.69e-05	0.000914	87233524	87255049	ZNF292
chr9	92858928	92864850	3.12	7.6	-4.48	1.7e-05	0.000914	92846069	92878022	ZNF484
chr10	5423702	5425766	1.03	5.42	-4.39	1.7e-05	0.000914	5412557	5459056	NET1
chr1	40460346	40461900	1.35	5.65	-4.3	1.7e-05	0.000918	40450476	40463715	ZFP69B
chr14	73396694	73397264	-0.16	4.98	-5.14	1.71e-05	0.00092	73284251	73410071	NUMB
chr10	132641248	132642755	1.99	6.19	-4.19	1.71e-05	0.00092	132607926	132777782	INPP5A
chr12	14478441	14479704	-0.16	5.04	-5.2	1.71e-05	0.000921	14478336	14481906	ATF7IP
chr13	114252852	114253961	-0.16	5.16	-5.32	1.72e-05	0.000924	114245743	114247237	CDC16
chr2	68143999	68145278	0.53	5.14	-4.61	1.73e-05	0.000926	68131760	68138785	WDR92
chr9	26884536	26885652	-0.16	5.29	-5.45	1.74e-05	0.000932	26869926	26887478	CAAP1
chr7	91870704	91871974	1.5	5.67	-4.17	1.74e-05	0.000932	91876895	91880439	MTERF1
chr14	31173156	31175856	2.01	6.48	-4.47	1.74e-05	0.000933	31172954	31174974	HECTD1
chr9	16788864	16792839	2.8	7.13	-4.33	1.77e-05	0.000947	16552600	16728214	BNC2
chr10	35050889	35052939	1.75	6.12	-4.37	1.78e-05	0.000953	35008551	35071339	CUL2
chr11	75862587	75863108	-0.16	4.94	-5.1	1.78e-05	0.000953	75878404	75961549	UVRAG
chr4	166734309	166736031	0.3	5.26	-4.96	1.78e-05	0.000954	166734147	167102557	SPOCK3
chr15	28187751	28188715	1.03	5.42	-4.39	1.79e-05	0.000954	28111079	28192122	HERC2
chr8	68002863	68004278	-0.16	5.27	-5.43	1.79e-05	0.000956	67952489	68111089	PREX2
chr10	74284216	74284807	-0.16	5.01	-5.17	1.81e-05	0.000963	74314733	74708549	ADK
chr2	135969727	135978129	2.68	7.54	-4.86	1.82e-05	0.00097	135943386	135980551	DARS1
chr6	144424119	144425520	-0.16	5.06	-5.22	1.82e-05	0.00097	144344101	144426328	UTRN
chr1	171586624	171588432	1.38	5.71	-4.32	1.82e-05	0.00097	171587073	171592223	PRRC2C
chr11	76114350	76115888	-0.16	5.09	-5.25	1.83e-05	0.000972	76115900	76141660	UVRAG
chr13	47981575	47982530	-0.16	5	-5.16	1.83e-05	0.000972	47948940	47988548	SUCLA2
chr5	98888480	98890397	-0.16	5.58	-5.74	1.83e-05	0.000972	98881247	98888186	CHD1
chr1	77594997	77598961	1.97	6.39	-4.42	1.84e-05	0.000979	77581818	77585059	ZZZ3
chr1	37871280	37872154	-0.16	4.97	-5.13	1.85e-05	0.000984	37866459	37873028	INPP5B
chr2	238068884	238071164	1.97	6.36	-4.39	1.86e-05	0.000986	238069457	238083246	SCLY
chr7	131447418	131448974	1.35	5.7	-4.36	1.86e-05	0.000986	131463276	131490539	MKLN1
chr21	39223659	39225475	1.67	5.98	-4.31	1.86e-05	0.000986	39202366	39229392	BRWD1
chr2	71396758	71397758	0.3	5.03	-4.74	1.86e-05	0.000986	71395719	71435058	ZNF638
chr2	197714222	197715124	-0.16	5.06	-5.22	1.87e-05	0.000989	197705369	197708395	MARS2
chr7	132841360	132842061	-0.16	5.14	-5.3	1.87e-05	0.000989	132758992	132760616	LOC100506937
chr11	118487867	118490388	-0.16	5.9	-6.06	1.87e-05	0.000989	118495191	118505185	KMT2A
chr3	15707577	15708242	0.55	5.12	-4.57	1.88e-05	0.000992	15697298	15697371	MIR3134
chr8	122827561	122830437	2.88	6.96	-4.09	1.88e-05	0.000992	122863385	122952009	ZHX2
chr13	98016533	98018051	1.79	6.11	-4.31	1.88e-05	0.000992	98018586	98019941	IPO5
chr4	16853343	16859772	-0.16	5.84	-6	1.89e-05	0.000996	16588710	16826560	LDB2
chr9	97158120	97159347	-0.16	5.02	-5.18	1.89e-05	0.000996	97195351	97197687	ANKRD18CP
chr4	173262553	173263471	-0.16	5.1	-5.26	1.89e-05	0.000997	173268160	173268233	MIR548T
chr16	81304283	81305917	1.94	6.01	-4.07	1.9e-05	0.000997	81314966	81379910	GAN
chr5	134807003	134808347	1.18	5.5	-4.32	1.9e-05	0.000999	134818916	134855133	DDX46
chr12	116079249	116080007	-0.16	4.99	-5.16	1.9e-05	0.001	115959364	116096911	MED13L
chr1	90902208	90903707	0.3	5.65	-5.36	1.91e-05	0.001	90916791	90918391	ZNF644
chr9	125802390	125803350	1.03	5.47	-4.45	1.91e-05	0.001	125843713	125965940	PBX3
chr10	110291247	110293087	-0.16	5.18	-5.35	1.92e-05	0.00101	110298677	110304131	SMNDC1
chr17	64507156	64514050	2.97	7.49	-4.52	1.93e-05	0.00101	64504755	64507530	DDX5
chr3	128181920	128182846	-0.16	5.01	-5.17	1.94e-05	0.00102	128064785	128153914	RUVBL1
chr1	45891994	45894234	-0.16	5.06	-5.22	1.96e-05	0.00102	45913588	46030759	MAST2
chr6	154793519	154795765	2.76	6.83	-4.07	1.97e-05	0.00103	154832697	155257723	TIAM2
chr10	119109758	119111488	-0.16	4.93	-5.09	1.98e-05	0.00103	119114105	119137984	DENND10
chr2	120106554	120108023	-0.16	5.27	-5.43	1.98e-05	0.00104	120100710	120108473	EPB41L5
chr2	148690191	148692533	2.07	6.48	-4.42	1.98e-05	0.00104	148690214	148692248	EPC2
chr21	25593434	25595568	1.85	5.95	-4.1	1.99e-05	0.00104	25582770	25583326	LINC00515
chr2	203501082	203501749	-0.16	4.96	-5.12	1.99e-05	0.00104	203444850	203495353	RAPH1
chr3	15030273	15033164	2.87	6.97	-4.1	1.99e-05	0.00104	15032427	15053600	NR2C2
chr22	47010523	47011251	-0.16	4.95	-5.11	1.99e-05	0.00104	46914092	46916042	TBC1D22A-AS1
chr2	96014772	96016568	-0.16	4.93	-5.09	2e-05	0.00104	96013730	96021608	FAHD2CP
chr13	41956949	41957601	-0.16	5.09	-5.25	2e-05	0.00104	41955808	41980977	VWA8-AS1
chr6	12027274	12029411	1.63	6.01	-4.38	2e-05	0.00104	12015587	12039245	HIVEP1
chr21	15749206	15751026	1.63	6.14	-4.52	2.01e-05	0.00104	15730025	15880069	USP25
chr10	68062993	68064046	-0.16	4.92	-5.08	2.01e-05	0.00104	67922484	68073097	HERC4
chr3	100267640	100270287	1.96	6.3	-4.34	2.01e-05	0.00105	100267192	100290656	TBC1D23
chr6	111441245	111442516	-0.16	4.94	-5.11	2.02e-05	0.00105	111405427	111411556	REV3L
chr1	225489284	225491129	-0.16	5.01	-5.17	2.02e-05	0.00105	225497423	225501256	ENAH
chr8	67244876	67246441	0.92	5.41	-4.49	2.03e-05	0.00105	67199929	67238754	ARFGEF1
chr10	95254635	95255839	-0.16	5.17	-5.33	2.03e-05	0.00105	95238634	95247620	PDLIM1
chr6	125683611	125684279	-0.16	4.96	-5.12	2.03e-05	0.00105	125674353	125720218	LINC02523
chr16	89496495	89498243	1.9	5.87	-3.98	2.04e-05	0.00105	89490917	89557748	SPG7
chr2	222607809	222610190	1.49	5.9	-4.41	2.04e-05	0.00105	222566899	222656092	FARSB
chr11	19996264	19997296	0.55	5.26	-4.71	2.04e-05	0.00106	20022556	20118603	NAV2
chr10	34415659	34416817	0.55	5.14	-4.59	2.05e-05	0.00106	34312264	34426731	PARD3
chr4	182508162	182509851	1.18	5.6	-4.42	2.05e-05	0.00106	182448999	182628875	TENM3
chr9	16793487	16794517	0.78	5.25	-4.47	2.05e-05	0.00106	16552600	16728214	BNC2
chr6	136454033	136460632	2.74	7.67	-4.93	2.06e-05	0.00106	136343782	136466875	MAP7
chr12	55967823	55970101	2	5.99	-4	2.06e-05	0.00106	55967462	55971087	CDK2
chr1	87027290	87028355	1.76	5.74	-3.98	2.06e-05	0.00106	86993009	87169204	LINC01140
chr19	52404283	52405363	0.53	5.22	-4.69	2.07e-05	0.00106	52405984	52415344	ZNF528
chr3	43294959	43296126	1.35	5.56	-4.2	2.07e-05	0.00106	43303112	43333390	SNRK
chr10	21679600	21681170	2.36	6.28	-3.92	2.07e-05	0.00106	21673578	21713922	MLLT10
chr1	116982031	116983273	0.24	5.23	-4.99	2.07e-05	0.00106	116967060	116974497	PTGFRN
chr5	147478009	147480155	1.83	6.2	-4.37	2.07e-05	0.00106	147418483	147454266	DPYSL3
chr5	116466118	116469069	2.71	6.84	-4.13	2.09e-05	0.00107	116446134	116469544	SEMA6A
chr10	68939408	68940801	-0.16	5.33	-5.49	2.09e-05	0.00107	68956170	68985068	DDX21
chr1	53019907	53021370	0.53	5.09	-4.56	2.1e-05	0.00107	53014974	53051610	SCP2
chr10	94585423	94589301	2.45	7.22	-4.77	2.1e-05	0.00107	94590699	94613905	HELLS
chr3	119434713	119436932	1.75	6.2	-4.45	2.1e-05	0.00107	119429500	119436816	TMEM39A
chr18	62947716	62948609	-0.16	5.11	-5.27	2.11e-05	0.00108	62906287	62941910	PHLPP1
chr4	56098709	56100275	1.9	5.92	-4.02	2.12e-05	0.00108	56049847	56314663	CRACD
chr12	132106059	132107708	-0.16	4.93	-5.09	2.13e-05	0.00108	132104021	132127177	EP400P1
chr9	115411241	115412263	-0.16	4.95	-5.11	2.13e-05	0.00109	115400346	115401315	2021-12-01
chr9	85960128	85962541	1.65	6.05	-4.4	2.14e-05	0.00109	85941529	85987041	NAA35
chr7	129321503	129322971	1.53	5.79	-4.25	2.14e-05	0.00109	129351503	129397269	AHCYL2
chr12	122872829	122873596	-0.16	5	-5.17	2.15e-05	0.00109	122870075	122871681	VPS37B
chr14	103519024	103522717	2.33	6.86	-4.54	2.15e-05	0.00109	103519668	103521322	CKB
chr10	19898479	19899583	-0.16	5.13	-5.29	2.16e-05	0.0011	19816432	20289856	PLXDC2
chr5	56930409	56931171	-0.16	4.97	-5.14	2.16e-05	0.0011	56935744	56938971	MIER3
chr4	84933066	84934590	0.78	5.36	-4.58	2.16e-05	0.0011	84965534	85008734	WDFY3-AS2
chr11	1446424	1447826	0.55	5.3	-4.74	2.16e-05	0.0011	1450658	1462087	BRSK2
chr1	62679875	62681298	-0.16	4.91	-5.07	2.18e-05	0.0011	62454726	62688264	DOCK7
chr4	154546417	154547631	-0.16	5.09	-5.25	2.18e-05	0.00111	154541958	154545954	PLRG1
chr11	125663635	125665671	2.42	6.44	-4.01	2.19e-05	0.00111	125672343	125680831	ACRV1
chr10	45879934	45882271	-0.16	4.9	-5.06	2.19e-05	0.00111	45854093	45892483	PARGP1-AGAP4
chr10	50612964	50614218	1	5.33	-4.33	2.19e-05	0.00111	50305600	50623956	SGMS1
chr11	8682341	8687867	2.85	7.84	-4.98	2.19e-05	0.00111	8682788	8683779	RPL27A
chr6	110959694	110960899	1.63	5.91	-4.28	2.2e-05	0.00111	110958928	110967890	GTF3C6
chr6	57149426	57150243	-0.16	4.94	-5.1	2.2e-05	0.00111	57152157	57154160	ZNF451
chr21	29336454	29340875	2.48	7.2	-4.72	2.21e-05	0.00112	29327276	29630751	GRIK1-AS2
chr7	118187338	118188347	1.18	5.51	-4.33	2.21e-05	0.00112	118184167	118188405	LSM8
chr18	55362856	55363721	-0.16	4.98	-5.14	2.21e-05	0.00112	55222334	55352023	TCF4
chr6	99501809	99503576	1.9	6.03	-4.13	2.22e-05	0.00112	99464636	99503773	USP45
chr1	223999823	224001880	-0.16	4.91	-5.07	2.22e-05	0.00112	224001907	224010116	LOC100287497
chr5	44810566	44814227	1.75	6.42	-4.67	2.22e-05	0.00112	44811985	44813629	MRPS30
chr1	151166719	151168165	1.18	5.56	-4.38	2.23e-05	0.00112	151167868	151169133	TNFAIP8L2-SCNM1
chr16	14138584	14142842	3.07	7.4	-4.33	2.23e-05	0.00112	14140625	14170470	MRTFB
chr16	70775063	70776459	1.18	5.63	-4.45	2.23e-05	0.00112	70780798	70786427	VAC14
chr1	20858210	20859789	-0.16	5.07	-5.23	2.23e-05	0.00112	20825104	20847945	EIF4G3
chr2	167465351	167466580	2	5.94	-3.94	2.24e-05	0.00112	167248682	167259749	XIRP2
chr17	54927377	54929353	2.36	6.29	-3.93	2.24e-05	0.00112	54936413	54937484	TOM1L1
chr19	53806059	53808584	2.25	6.37	-4.12	2.25e-05	0.00113	53793743	53808705	NLRP12
chr4	151538373	151539974	1.37	5.45	-4.09	2.25e-05	0.00113	151533012	151663628	FAM160A1
chr3	37131840	37136225	1.91	6.4	-4.49	2.25e-05	0.00113	37083645	37111915	LRRFIP2
chr15	43068653	43069576	-0.16	5.03	-5.19	2.25e-05	0.00113	43043214	43059804	UBR1
chr11	76075533	76076707	1.76	5.78	-4.02	2.26e-05	0.00113	76115900	76141660	UVRAG
chr5	78247880	78250418	2.07	6.58	-4.51	2.26e-05	0.00113	78002326	78294692	AP3B1
chr3	176322097	176323255	-0.16	4.92	-5.08	2.27e-05	0.00114	176515103	176515151	MIR7977
chr7	75532577	75534467	1.79	5.9	-4.11	2.28e-05	0.00114	75512589	75528148	PMS2P3
chr4	112647113	112648075	-0.16	4.97	-5.14	2.29e-05	0.00114	112648004	112648071	MIR302D
chr12	32183227	32186252	2.41	6.44	-4.03	2.29e-05	0.00114	32107332	32338809	BICD1
chr5	121980359	121981417	-0.16	4.91	-5.08	2.3e-05	0.00115	121961975	122028633	SRFBP1
chr3	188384984	188385864	-0.16	4.9	-5.06	2.3e-05	0.00115	188341663	188609279	LPP
chr4	141124020	141124598	-0.16	4.9	-5.06	2.31e-05	0.00115	140865576	141132637	RNF150
chr16	31726183	31727331	1.03	5.37	-4.35	2.31e-05	0.00115	31713306	31754484	ZNF720
chr10	63354703	63355884	1.49	5.75	-4.26	2.31e-05	0.00115	63372957	63373048	MIR1296
chr2	72662176	72663115	-0.16	4.95	-5.11	2.32e-05	0.00116	72499928	72515754	EXOC6B
chr4	92662307	92664022	-0.16	5.2	-5.36	2.33e-05	0.00116	92822949	93112247	GRID2
chr7	107754806	107755679	-0.16	4.97	-5.13	2.33e-05	0.00116	107742962	107744581	LOC101927974
chr2	85407863	85408558	-0.16	4.93	-5.09	2.34e-05	0.00116	85398690	85408815	CAPG
chr1	156070168	156072045	1.88	5.84	-3.96	2.35e-05	0.00116	156068212	156070365	RAB25
chr10	92627034	92629781	-0.16	5.76	-5.92	2.35e-05	0.00116	92593130	92655395	KIF11
chr14	48215250	48216077	-0.16	4.92	-5.09	2.36e-05	0.00117	47764954	47795302	LINC00648
chr7	87184275	87189319	2.9	7.51	-4.61	2.36e-05	0.00117	87185996	87193301	DMTF1
chr17	29521762	29524048	1.18	5.65	-4.47	2.36e-05	0.00117	29522288	29530738	TAOK1
chr7	39576237	39577955	1.94	5.99	-4.04	2.36e-05	0.00117	39570254	39572572	YAE1
chr15	57142663	57144758	-0.16	5.79	-5.95	2.36e-05	0.00117	57134316	57231252	TCF12
chr14	39156226	39157803	0.78	5.43	-4.65	2.36e-05	0.00117	39149990	39170314	TRAPPC6B
chr15	34097688	34101619	2.75	6.95	-4.2	2.37e-05	0.00117	34084330	34101807	EMC7
chr22	35813740	35814700	-0.16	4.92	-5.08	2.38e-05	0.00117	35743958	35810004	RBFOX2
chr14	75129498	75130556	-0.16	4.93	-5.09	2.4e-05	0.00118	75118887	75127344	NEK9
chr12	45853506	45856461	2.55	7.18	-4.63	2.4e-05	0.00118	45852295	45908040	ARID2
chr3	111104090	111105571	1.18	5.54	-4.36	2.41e-05	0.00119	111074204	111118703	NECTIN3
chr16	14206646	14209223	2.57	6.61	-4.04	2.41e-05	0.00119	14200330	14241468	MRTFB
chr3	134163346	134165024	-0.16	5.61	-5.77	2.41e-05	0.00119	134157134	134181672	RYK
chr17	20869776	20874819	2.8	7.69	-4.89	2.41e-05	0.00119	20868547	20932818	CCDC144NL-AS1
chr19	44143166	44144559	-0.16	5.05	-5.21	2.43e-05	0.00119	44141910	44148811	ZNF234
chr5	36992493	36994172	1.75	6.02	-4.27	2.43e-05	0.00119	36995150	37000506	NIPBL
chr17	59053523	59055500	0.23	5.14	-4.92	2.43e-05	0.00119	59064152	59079807	TRIM37
chr18	34520730	34521745	-0.16	5.01	-5.17	2.44e-05	0.0012	34493903	34794247	DTNA
chr21	39211089	39211666	-0.16	4.9	-5.07	2.44e-05	0.0012	39209786	39218660	BRWD1
chr11	9499346	9501638	1.01	5.22	-4.21	2.45e-05	0.0012	9512497	9525479	ZNF143
chr19	34225370	34226231	-0.16	4.87	-5.03	2.45e-05	0.0012	34221350	34227617	LSM14A
chr12	32798869	32801523	2.4	6.23	-3.83	2.46e-05	0.0012	32791943	32792875	PKP2
chr19	36723564	36724569	-0.16	4.96	-5.12	2.46e-05	0.0012	36712482	36727701	ZNF567
chr16	31733674	31734902	0.23	5.04	-4.82	2.47e-05	0.0012	31713306	31754484	ZNF720
chr13	113257316	113259025	0.53	5.25	-4.72	2.51e-05	0.00123	113262920	113262999	MIR8075
chr20	41085787	41087337	0.24	4.97	-4.73	2.52e-05	0.00123	41136960	41175721	PLCG1
chr7	104188612	104189370	-0.16	4.94	-5.1	2.53e-05	0.00123	104184220	104197767	ORC5
chr11	123160950	123162172	-0.16	4.9	-5.07	2.53e-05	0.00123	123069872	123195248	CLMP
chr2	167463305	167464701	-0.16	4.88	-5.04	2.55e-05	0.00124	167248682	167259749	XIRP2
chr7	7224307	7230093	3.02	7.55	-4.54	2.55e-05	0.00124	7234258	7248651	C1GALT1
chr10	5711484	5712608	-0.16	4.87	-5.04	2.56e-05	0.00125	5709626	5714574	TASOR2
chr6	38054250	38055993	0.55	5.54	-4.99	2.57e-05	0.00125	38061611	38062660	ZFAND3
chr15	89877106	89878275	-0.16	4.87	-5.03	2.57e-05	0.00125	89883931	89884030	MIR5009
chr3	49701731	49702678	-0.16	4.97	-5.13	2.57e-05	0.00125	49700500	49702110	RNF123
chr4	78315782	78317391	1.18	5.49	-4.31	2.58e-05	0.00125	78255246	78338037	FRAS1
chr14	60896211	60896780	-0.16	4.9	-5.06	2.58e-05	0.00125	60879714	60982585	MNAT1
chr11	134103540	134104488	-0.16	4.91	-5.07	2.58e-05	0.00125	134126339	134144996	JAM3
chr3	100264692	100265469	0.53	5.04	-4.51	2.59e-05	0.00126	100267192	100290656	TBC1D23
chr14	37154729	37155453	-0.16	4.95	-5.11	2.6e-05	0.00126	37171888	37173811	SLC25A21-AS1
chr21	33815171	33816239	-0.16	5.01	-5.17	2.6e-05	0.00126	33818026	33829029	ITSN1
chr8	94720918	94722286	1.52	5.52	-4	2.61e-05	0.00126	94719900	94793836	DPY19L4
chr10	21225218	21225833	-0.16	4.96	-5.12	2.61e-05	0.00126	21174354	21174923	NEBL-AS1
chr2	227327405	227328723	1.22	5.56	-4.34	2.61e-05	0.00126	227328678	227357836	MFF
chr11	10078266	10080277	2.26	6.19	-3.93	2.61e-05	0.00126	9993012	10044606	SBF2
chr5	141461244	141462628	1	5.37	-4.38	2.61e-05	0.00126	141475947	141478795	PCDHGC3
chr7	24613532	24620103	3.06	8.2	-5.14	2.62e-05	0.00126	24623668	24624070	MPP6
chr15	65569694	65571422	0.92	5.3	-4.38	2.62e-05	0.00126	65574265	65576499	HACD3
chr2	215931742	215934951	1.86	6.26	-4.39	2.62e-05	0.00126	215942584	216013551	MREG
chr16	53306842	53308017	1.83	5.81	-3.97	2.65e-05	0.00128	53314506	53321563	CHD9
chr18	2969990	2970652	1.35	5.57	-4.22	2.65e-05	0.00128	2954516	2982873	LPIN2
chr3	171346214	171346791	-0.16	4.88	-5.04	2.65e-05	0.00128	171063881	171460063	TNIK
chr2	1054981	1055982	1.3	5.42	-4.11	2.66e-05	0.00128	1102546	1209230	SNTG2
chr2	167425458	167427266	2.03	6.01	-3.98	2.67e-05	0.00128	167248682	167259749	XIRP2
chr7	66993654	66994714	-0.16	4.88	-5.04	2.68e-05	0.00129	66991137	66994366	SBDS
chr11	46972966	46974274	1.01	5.22	-4.21	2.69e-05	0.00129	46936780	47161816	C11orf49
chr18	62922345	62923240	1.19	5.34	-4.15	2.7e-05	0.00129	62906287	62941910	PHLPP1
chr11	19806583	19807798	0.81	5.24	-4.44	2.7e-05	0.00129	19813718	19832601	NAV2
chr17	16013937	16015051	-0.16	4.95	-5.11	2.7e-05	0.00129	16023673	16028786	TTC19
chr18	56609815	56610375	-0.16	4.89	-5.05	2.71e-05	0.0013	56602898	56614491	TXNL1
chr1	213066814	213068285	1	5.33	-4.34	2.71e-05	0.0013	213072938	213274773	RPS6KC1
chr6	15566332	15567764	-0.16	5.36	-5.52	2.72e-05	0.0013	15523055	15548362	DTNBP1
chr3	107588389	107589046	-0.16	4.87	-5.03	2.72e-05	0.0013	107599313	107805858	BBX
chr9	106947100	106947998	0.64	5.15	-4.51	2.72e-05	0.0013	106938977	106974970	ZNF462
chr8	41496187	41497210	1.51	5.49	-3.98	2.72e-05	0.0013	41502569	41510139	GOLGA7
chr3	63990399	63991113	1.01	5.21	-4.2	2.74e-05	0.00131	63990510	63995877	ATXN7
chr3	33688686	33692761	2.33	6.79	-4.47	2.74e-05	0.00131	33682979	33688368	CLASP2
chr6	126002928	126005123	1.69	6.09	-4.4	2.74e-05	0.00131	126006842	126038753	TRMT11
chr12	5129292	5130497	-0.16	4.99	-5.15	2.75e-05	0.00131	5043879	5046788	KCNA5
chr20	30378304	30380605	-0.16	4.91	-5.07	2.75e-05	0.00131	30377372	30399257	FRG1BP
chr3	160522160	160525157	2.07	6.32	-4.25	2.76e-05	0.00131	160504958	160521796	KPNA4
chr4	84851418	84856120	2.51	6.6	-4.09	2.77e-05	0.00132	84841192	84850015	WDFY3
chr9	97175850	97177785	1.69	6.02	-4.33	2.77e-05	0.00132	97195351	97197687	ANKRD18CP
chr8	122969466	122970827	2.17	6.12	-3.95	2.77e-05	0.00132	123015442	123025650	DERL1
chr1	24359593	24360889	-0.16	4.92	-5.09	2.78e-05	0.00132	24342160	24343275	GRHL3
chr8	103546698	103547568	0.81	5.22	-4.42	2.78e-05	0.00132	103398658	103501895	SLC25A32
chr1	52372881	52373859	-0.16	5	-5.17	2.78e-05	0.00132	52350593	52366193	CC2D1B
chr11	111742130	111747653	3.26	7.49	-4.23	2.78e-05	0.00132	111741548	111747994	PPP2R1B
chr13	51667367	51668739	0.81	5.32	-4.51	2.79e-05	0.00132	51739148	51753123	WDFY2
chr13	48080901	48081764	-0.16	4.89	-5.06	2.79e-05	0.00132	48053323	48079975	MED4
chr5	69396900	69398201	-0.16	4.95	-5.11	2.8e-05	0.00132	69391968	69414255	RAD17
chr5	15841761	15842742	0.3	5.27	-4.97	2.8e-05	0.00132	15927888	15939795	FBXL7
chr4	120898326	120900118	1.89	5.99	-4.11	2.81e-05	0.00133	120695111	120922681	PRDM5
chr10	32289345	32291269	-0.16	5.38	-5.54	2.81e-05	0.00133	32271554	32272249	EPC1
chr12	51803744	51804708	-0.16	4.87	-5.04	2.83e-05	0.00134	51786765	51788547	SCN8A
chr19	4180559	4182225	1.9	5.86	-3.96	2.83e-05	0.00134	4174141	4182279	SIRT6
chr8	56187756	56189257	1.53	5.81	-4.27	2.83e-05	0.00134	56166034	56171424	PLAG1
chr6	41077485	41079394	1.69	5.79	-4.1	2.83e-05	0.00134	41072983	41097950	NFYA
chr17	73225513	73226411	-0.16	4.96	-5.12	2.86e-05	0.00135	73209575	73227700	FAM104A
chr1	222694526	222699146	2.52	7.12	-4.59	2.87e-05	0.00135	222670190	222712263	AIDA
chr2	119890836	119894355	2.48	7.02	-4.54	2.87e-05	0.00135	119882503	119977461	PTPN4
chr18	9764396	9765184	1.03	5.34	-4.31	2.87e-05	0.00135	9775287	9859592	RAB31
chr5	114381487	114383390	1.91	6.15	-4.24	2.87e-05	0.00135	114363107	114495946	KCNN2
chr5	148401582	148402220	-0.16	4.84	-5.01	2.89e-05	0.00136	148404684	148410868	FBXO38
chr1	169477079	169480150	2.11	6.65	-4.54	2.89e-05	0.00136	169463929	169485931	SLC19A2
chr12	123659089	123660163	0.78	5.41	-4.63	2.91e-05	0.00136	123659363	123660628	GTF2H3
chr4	93112125	93115466	2.4	6.55	-4.15	2.91e-05	0.00136	93084986	93774553	GRID2
chr5	32398862	32399814	0.23	4.93	-4.71	2.91e-05	0.00136	32394378	32394475	MIR579
chr17	12092697	12093293	0.53	5.12	-4.59	2.93e-05	0.00137	12095602	12110809	MAP2K4
chr13	46023162	46024093	0.78	5.25	-4.47	2.94e-05	0.00138	46010150	46020487	ZC3H13
chr2	73525206	73526174	-0.16	4.89	-5.05	2.95e-05	0.00138	73519956	73609700	ALMS1
chr12	94454040	94456164	2.01	6.36	-4.35	2.95e-05	0.00138	94309993	94459678	CEP83
chr2	178447538	178450287	2.83	6.91	-4.08	2.95e-05	0.00138	178443289	178450484	PRKRA
chr11	66901149	66904316	2.01	6.06	-4.05	2.96e-05	0.00138	66848513	66907901	PC
chr17	38359871	38361242	0.64	5.37	-4.72	2.97e-05	0.00139	38352943	38377738	SOCS7
chr7	143306449	143307873	1.86	6.11	-4.24	2.97e-05	0.00139	143316111	143352083	CLCN1
chr6	169718325	169719677	0.53	5.03	-4.5	2.98e-05	0.00139	169717742	169719298	PHF10
chr9	101558580	101561355	1.97	6.29	-4.32	2.98e-05	0.00139	101560681	101561452	RNF20
chr3	160414527	160416029	1.89	5.88	-3.99	2.98e-05	0.00139	160414438	160416627	SMC4
chr12	22652159	22654279	-0.16	4.95	-5.12	2.98e-05	0.00139	22646019	22685712	ETNK1
chr16	57209367	57210029	0.23	5.01	-4.78	2.98e-05	0.00139	57208050	57220824	RSPRY1
chr3	136288365	136289446	1.3	5.37	-4.07	2.99e-05	0.00139	136260150	136330169	PCCB
chr14	96817882	96820931	1.97	6.39	-4.42	2.99e-05	0.00139	96797385	96853055	VRK1
chr5	60642285	60643401	-0.16	4.89	-5.05	3e-05	0.00139	60645516	60648147	DEPDC1B
chr10	112451124	112452559	2.27	6.1	-3.83	3e-05	0.00139	112447359	112527405	VTI1A
chr4	84910201	84911147	0.8	5.19	-4.39	3e-05	0.0014	84808866	84896941	WDFY3
chr7	24389576	24391079	-0.16	5.16	-5.32	3.01e-05	0.0014	24285107	24291824	NPY
chr13	98365895	98367554	0.92	5.47	-4.55	3.01e-05	0.0014	98377821	98389693	FARP1
chr10	63182404	63183255	-0.16	4.96	-5.12	3.01e-05	0.0014	63167221	63176555	JMJD1C
chr1	21088268	21089671	-0.16	5.66	-5.83	3.02e-05	0.0014	21064531	21111610	EIF4G3
chr14	64497777	64500145	1.75	5.95	-4.2	3.02e-05	0.0014	64503725	64521970	ZBTB1
chr2	11297505	11300845	3.05	6.94	-3.89	3.03e-05	0.0014	11221327	11287737	ROCK2
chr2	231142982	231145969	2.25	6.61	-4.37	3.03e-05	0.0014	231153469	231163710	PSMD1
chr7	152339959	152340468	-0.16	4.93	-5.1	3.03e-05	0.0014	152309934	152312296	KMT2C
chr6	79049565	79050585	-0.16	5.15	-5.31	3.04e-05	0.00141	78934419	79078254	PHIP
chr4	16036871	16038708	1.18	5.42	-4.24	3.05e-05	0.00141	16018301	16038014	PROM1
chr14	50498997	50501212	1.86	6.12	-4.26	3.05e-05	0.00141	50485929	50505128	MAP4K5
chr2	206774940	206777759	2.55	6.89	-4.34	3.06e-05	0.00141	206783234	206783308	MIR3130-2
chr19	9770587	9771478	0.23	4.93	-4.71	3.08e-05	0.00142	9752140	9768734	ZNF846
chr6	37935792	37936644	1.18	5.42	-4.23	3.08e-05	0.00142	37929959	38142331	ZFAND3
chr12	116118634	116120595	2.34	6.13	-3.8	3.08e-05	0.00142	115959364	116096911	MED13L
chr20	16548362	16549341	-0.16	4.83	-4.99	3.11e-05	0.00143	16272104	16573433	KIF16B
chr8	60608799	60610638	2.18	6.04	-3.86	3.11e-05	0.00143	60591690	60620938	RAB2A
chr22	35830916	35833894	1.97	6.41	-4.44	3.12e-05	0.00144	35743602	35840218	RBFOX2
chr6	126005673	126007497	1.63	5.93	-4.3	3.12e-05	0.00144	126006842	126038753	TRMT11
chr1	16898872	16900059	-0.16	5.06	-5.22	3.13e-05	0.00144	16895980	16896143	RNVU1-18
chr2	11292749	11296137	-0.16	5.66	-5.82	3.13e-05	0.00144	11221327	11287737	ROCK2
chr1	81917669	81919105	-0.16	5.22	-5.38	3.14e-05	0.00144	81942969	81991368	ADGRL2
chr10	113858132	113858897	0.23	4.98	-4.75	3.15e-05	0.00144	113854824	113858852	NHLRC2
chr2	127381870	127383982	1.38	5.68	-4.3	3.15e-05	0.00145	127337759	127387932	MAP3K2
chr4	75647345	75651745	2.85	7.72	-4.87	3.16e-05	0.00145	75647024	75649102	G3BP2
chr19	32415984	32416591	-0.16	4.87	-5.03	3.17e-05	0.00145	32406189	32436495	DPY19L3
chr22	33362765	33364182	0.55	5.02	-4.47	3.18e-05	0.00146	33162226	33384227	LARGE1
chr19	20392711	20394153	2.11	6.15	-4.05	3.18e-05	0.00146	20399272	20399354	MIR1270
chr2	25932941	25935065	1.03	5.3	-4.27	3.19e-05	0.00146	25929419	25951919	KIF3C
chr2	39412957	39414951	1.69	5.85	-4.16	3.19e-05	0.00146	39436530	39601410	MAP4K3-DT
chr13	55563255	55565064	1.53	5.74	-4.2	3.2e-05	0.00146	55174454	55174548	MIR5007
chr4	139137573	139138464	-0.16	4.84	-5.01	3.21e-05	0.00146	139057717	139139476	ELF2
chr7	37652659	37653868	1.19	5.42	-4.23	3.21e-05	0.00146	37683796	37833788	GPR141
chr17	49616462	49617289	-0.16	5.14	-5.31	3.21e-05	0.00146	49607250	49619304	SPOP
chr6	75634740	75635860	-0.16	4.9	-5.06	3.21e-05	0.00146	75633704	75679867	SENP6
chr7	140820711	140821834	1.22	5.41	-4.2	3.21e-05	0.00146	140725145	140824398	BRAF
chr10	92012569	92013907	-0.16	4.97	-5.13	3.22e-05	0.00146	91980520	91982415	BTAF1
chr14	45224877	45225338	-0.16	4.9	-5.06	3.22e-05	0.00147	45210463	45224124	MIS18BP1
chr7	64322442	64323781	-0.16	4.84	-5	3.24e-05	0.00147	64314014	64337362	ZNF736
chr22	44754154	44754985	-0.16	4.81	-4.97	3.26e-05	0.00148	44752705	44814718	ARHGAP8
chr22	40118477	40120428	2.5	6.35	-3.86	3.26e-05	0.00148	40177925	40246362	TNRC6B
chr4	92580940	92582002	0.23	4.93	-4.7	3.27e-05	0.00148	92822949	93112247	GRID2
chr11	27668087	27669130	-0.16	4.83	-4.99	3.27e-05	0.00149	27675726	27696422	BDNF-AS
chr14	77729070	77730324	0.55	5.21	-4.66	3.28e-05	0.00149	77730856	77737007	SNW1
chr1	229335065	229337564	1.75	6.02	-4.27	3.28e-05	0.00149	229321515	229340633	CCSAP
chr3	171373540	171374534	-0.16	4.92	-5.08	3.29e-05	0.00149	171063881	171460063	TNIK
chr10	63492886	63494009	-0.16	4.99	-5.15	3.3e-05	0.0015	63167225	63465977	JMJD1C
chr1	229543660	229544364	-0.16	4.84	-5	3.3e-05	0.0015	229526062	229531902	ABCB10
chr6	157011852	157019869	3.15	8.3	-5.16	3.31e-05	0.0015	157022286	157208694	ARID1B
chr14	54706251	54707902	1.71	5.59	-3.88	3.32e-05	0.0015	54688020	54735137	SAMD4A
chr9	127626842	127627858	0.23	4.91	-4.69	3.32e-05	0.0015	127612361	127613751	STXBP1
chr4	150919011	150920521	-0.16	5.11	-5.27	3.34e-05	0.00151	150264689	150871425	LRBA
chr15	56715478	56717738	2.07	5.93	-3.86	3.35e-05	0.00151	56652490	56707318	ZNF280D
chr1	224278394	224280486	0.78	5.32	-4.54	3.36e-05	0.00151	224231266	224269915	NVL
chr11	9575697	9578112	-0.16	5.62	-5.78	3.36e-05	0.00151	9577785	9586581	WEE1
chr6	157320048	157322346	1.35	5.53	-4.19	3.36e-05	0.00151	157289386	157323601	TMEM242
chr12	12145611	12147953	1.97	6.19	-4.22	3.36e-05	0.00151	12125362	12135228	LRP6
chr9	33937721	33939112	1.35	5.65	-4.31	3.36e-05	0.00151	33927027	33941711	UBAP2
chr7	105266897	105267656	-0.16	4.81	-4.97	3.37e-05	0.00151	105116377	105269015	SRPK2
chr2	42438855	42441684	2.11	6.5	-4.39	3.37e-05	0.00151	42350941	42388507	COX7A2L
chr17	37257603	37258238	-0.16	4.88	-5.04	3.37e-05	0.00151	37247902	37248676	ACACA
chr2	70042434	70042838	-0.16	4.83	-4.99	3.38e-05	0.00152	70032210	70046664	PCBP1-AS1
chr4	39858236	39859858	0.23	5.02	-4.8	3.38e-05	0.00152	39837012	39848561	PDS5A
chr2	239197999	239198672	-0.16	5.15	-5.31	3.38e-05	0.00152	239163833	239191056	HDAC4
chr9	628477	629071	0.64	5.03	-4.39	3.39e-05	0.00152	706889	746103	KANK1
chr1	85580881	85582941	1.86	6.09	-4.23	3.4e-05	0.00152	85581200	85582099	CCN1
chr1	224390971	224399091	3.5	8.06	-4.56	3.4e-05	0.00152	224398227	224398311	MIR4742
chr3	121442357	121443853	-0.16	4.93	-5.09	3.42e-05	0.00153	121440084	121481596	POLQ
chr4	99029129	99036738	3.27	7.96	-4.68	3.43e-05	0.00153	99039203	99045278	METAP1
chr10	35481641	35482870	0.81	5.27	-4.46	3.43e-05	0.00153	35525961	35566128	CCNY
chr2	108736798	108740037	3.16	6.95	-3.79	3.43e-05	0.00153	108730817	108731898	RANBP2
chr12	43801241	43802433	-0.16	4.92	-5.08	3.44e-05	0.00153	43795556	43797851	TWF1
chr2	26368058	26369071	0.24	5.12	-4.88	3.44e-05	0.00153	26308512	26346817	ADGRF3
chr20	13756255	13758098	-0.16	4.98	-5.14	3.44e-05	0.00153	13728399	13782597	ESF1
chr17	50862968	50864001	1.35	5.57	-4.23	3.44e-05	0.00153	50862223	50866354	TOB1
chr12	84683099	84684077	-0.16	4.93	-5.09	3.44e-05	0.00153	84861603	84867833	SLC6A15
chr9	69721668	69723794	1.75	5.91	-4.16	3.46e-05	0.00154	69718021	69723571	PTAR1
chr3	133620764	133621802	-0.16	5.01	-5.17	3.48e-05	0.00155	133616821	133617526	TOPBP1
chr3	47098564	47099362	0.53	5.05	-4.52	3.48e-05	0.00155	47088184	47098451	SETD2
chr5	83491662	83493730	2.16	6.11	-3.95	3.49e-05	0.00155	83512102	83537247	VCAN
chr6	73436810	73437653	-0.16	4.82	-4.98	3.49e-05	0.00155	73439743	73445685	CGAS
chr6	34855218	34857003	1.78	5.8	-4.02	3.49e-05	0.00155	34877462	34888027	TAF11
chr11	18513645	18515338	-0.16	5	-5.16	3.5e-05	0.00155	18483936	18514850	TSG101
chr6	2177899	2178999	1.35	5.55	-4.2	3.5e-05	0.00155	1623806	2175991	GMDS
chr10	27135235	27136624	1.63	5.84	-4.21	3.5e-05	0.00155	27123547	27136337	YME1L1
chr13	28179153	28180226	-0.16	4.9	-5.06	3.51e-05	0.00156	28139033	28295335	PAN3
chr11	73804253	73805418	0.24	4.98	-4.74	3.51e-05	0.00156	73808308	73845137	MRPL48
chr2	195699768	195703026	2.4	6.89	-4.49	3.52e-05	0.00156	195680477	195717383	SLC39A10
chr3	107530891	107532576	2.47	6.47	-4.01	3.52e-05	0.00156	107525402	107773066	BBX
chr5	62575045	62576842	-0.16	5.35	-5.51	3.53e-05	0.00156	62578819	62581446	LRRC70
chr5	66146019	66155161	3.01	7.98	-4.98	3.53e-05	0.00156	66144835	66179114	SREK1
chr12	56301136	56302368	-0.16	4.98	-5.14	3.53e-05	0.00156	56286160	56300391	CS
chr2	161318194	161319085	-0.16	4.85	-5.01	3.54e-05	0.00156	161308600	161370119	PSMD14
chr2	188350843	188352585	2.58	6.37	-3.79	3.54e-05	0.00156	188139637	188384313	LINC01090
chr2	188529455	188530564	-0.16	4.82	-4.98	3.54e-05	0.00156	188529172	188588701	GULP1
chr1	36388066	36389628	-0.16	4.89	-5.05	3.55e-05	0.00156	36339624	36385896	STK40
chr8	35454479	35456338	-0.16	5.39	-5.55	3.55e-05	0.00156	35544392	35794662	UNC5D
chr16	4823186	4824056	-0.16	4.86	-5.02	3.55e-05	0.00156	4817664	4821664	GLYR1
chr14	54481307	54488788	3.62	8.18	-4.56	3.58e-05	0.00157	54477922	54483768	GMFB
chr17	5339641	5341349	-0.16	4.94	-5.1	3.58e-05	0.00157	5332055	5336689	RABEP1
chr19	23219340	23219761	-0.16	4.86	-5.02	3.58e-05	0.00157	23221599	23250360	ZNF724
chr15	90438748	90439359	-0.16	4.87	-5.03	3.58e-05	0.00157	90426152	90429849	IQGAP1
chr8	70375743	70377012	1.35	5.52	-4.17	3.6e-05	0.00158	70112070	70402079	NCOA2
chr5	75478111	75479975	1.91	6.17	-4.27	3.6e-05	0.00158	75371121	75506004	CERT1
chr10	30319867	30325875	3.52	7.93	-4.41	3.6e-05	0.00158	30326564	30348977	MTPAP
chr4	77950329	77951864	-0.16	4.86	-5.02	3.6e-05	0.00158	77908325	77952783	MRPL1
chr13	46594743	46598701	2.55	6.69	-4.14	3.61e-05	0.00158	46553200	46743595	LRCH1
chr2	188463310	188467316	2.8	7.57	-4.78	3.61e-05	0.00158	188522738	188584309	GULP1
chr17	45470337	45470953	-0.16	4.93	-5.09	3.62e-05	0.00158	45475363	45475435	MIR4315-1
chr10	73563262	73563700	0.24	4.87	-4.63	3.62e-05	0.00158	73498295	73553340	USP54
chr3	138168650	138170447	0.78	5.12	-4.34	3.62e-05	0.00158	138163349	138174859	DBR1
chr14	50634150	50634707	-0.16	4.86	-5.02	3.62e-05	0.00158	50628166	50632320	ATL1
chr7	112462049	112466535	2.29	6.88	-4.59	3.63e-05	0.00159	112461332	112472244	IFRD1
chr1	42178224	42180904	2.36	6.39	-4.03	3.63e-05	0.00159	42176539	42189809	FOXJ3
chr10	98156329	98159324	1.63	5.84	-4.22	3.63e-05	0.00159	98162883	98244349	R3HCC1L
chr4	185291480	185293236	1.22	5.63	-4.42	3.64e-05	0.00159	185295827	185363510	SNX25
chr2	42639533	42641940	2.52	6.57	-4.05	3.64e-05	0.00159	42659520	42682706	MTA3
chr2	241365946	241369199	1.63	5.95	-4.32	3.65e-05	0.00159	241372560	241395644	FARP2
chr8	28960900	28962379	2.19	6.04	-3.85	3.65e-05	0.00159	28963863	29051549	HMBOX1
chr17	42252674	42254432	-0.16	5.59	-5.75	3.65e-05	0.00159	42199168	42276406	STAT5B
chr3	149135285	149136435	1.27	5.3	-4.03	3.66e-05	0.00159	149129691	149154109	HPS3
chr9	132289015	132290631	1	5.36	-4.37	3.66e-05	0.00159	132282770	132286497	SETX
chr9	73986462	73990690	2.66	7.26	-4.6	3.67e-05	0.00159	74371335	74373048	LOC101927358
chr18	2574772	2575824	-0.16	4.97	-5.13	3.67e-05	0.00159	2577849	2582879	NDC80
chr15	68108024	68113846	2.74	7.5	-4.76	3.69e-05	0.0016	68146662	68153961	PIAS1
chr7	24650931	24652798	0.92	5.41	-4.48	3.69e-05	0.0016	24663474	24666046	MPP6
chr10	69134893	69138625	2.48	6.67	-4.2	3.7e-05	0.00161	69132898	69171359	VPS26A
chr4	92256012	92257462	1.16	5.51	-4.35	3.7e-05	0.00161	92268767	92277075	LNCPRESS2
chr6	114410663	114411712	-0.16	4.86	-5.03	3.72e-05	0.00161	114055586	114343045	HS3ST5
chr8	51871434	51872466	1.27	5.2	-3.93	3.73e-05	0.00162	51844809	51860884	PCMTD1
chr5	44814899	44816953	1.16	5.49	-4.34	3.74e-05	0.00162	44811985	44813629	MRPS30
chr1	222819559	222822155	2.21	6.58	-4.37	3.74e-05	0.00162	222815129	222837380	DISP1
chr10	74076066	74076780	-0.16	4.8	-4.96	3.75e-05	0.00162	74104928	74108975	VCL
chr9	77800445	77802097	1.49	5.66	-4.16	3.76e-05	0.00163	77423079	77648322	GNA14
chr2	148727133	148734252	3.32	7.86	-4.54	3.79e-05	0.00164	148753895	148762215	EPC2
chr3	43310309	43311711	0.3	5.23	-4.94	3.79e-05	0.00164	43303112	43333390	SNRK
chr4	98883048	98887867	3.34	7.64	-4.3	3.8e-05	0.00164	98881010	98890898	EIF4E
chr5	32265168	32268147	2.01	6.23	-4.22	3.8e-05	0.00164	32243521	32255937	MTMR12
chr8	67327294	67328073	-0.16	4.83	-4.99	3.82e-05	0.00164	67299314	67343677	ARFGEF1
chr2	160357596	160358473	0.24	4.99	-4.75	3.82e-05	0.00164	160272152	160367526	RBMS1
chr1	150285186	150286805	0.23	4.97	-4.74	3.82e-05	0.00164	150283534	150286633	CIART
chr10	20011154	20011971	0.81	5.16	-4.35	3.82e-05	0.00164	20043320	20280357	PLXDC2
chr10	96538884	96542301	2.45	6.98	-4.53	3.82e-05	0.00164	96543601	96552943	TM9SF3
chr5	57252058	57265500	3.77	8.68	-4.91	3.83e-05	0.00165	57248862	57261238	GPBP1
chr3	37033695	37034686	0.23	4.87	-4.65	3.83e-05	0.00165	37025976	37050537	MLH1
chr4	93073602	93075177	-0.16	5.24	-5.4	3.84e-05	0.00165	93084986	93774553	GRID2
chr5	79309524	79312031	1.67	5.88	-4.21	3.84e-05	0.00165	79300243	79325197	JMY
chr20	21343928	21345883	1.75	5.97	-4.22	3.85e-05	0.00165	21303331	21389825	XRN2
chr19	57634235	57635294	1.38	5.65	-4.26	3.87e-05	0.00166	57633225	57634079	ZNF211
chr14	23479218	23480039	-0.16	4.84	-5	3.87e-05	0.00166	23477213	23509862	NGDN
chr13	27167818	27170006	2.5	6.39	-3.89	3.88e-05	0.00166	27170091	27171701	USP12
chr16	88723506	88724498	0.3	4.91	-4.61	3.88e-05	0.00166	88722523	88723934	PIEZO1
chr5	142838	144375	1.49	5.63	-4.14	3.88e-05	0.00166	140566	157110	PLEKHG4B
chr2	60544436	60547830	3.09	7.15	-4.06	3.88e-05	0.00166	60451890	60546201	BCL11A
chr17	67526002	67528555	1.97	6.16	-4.19	3.89e-05	0.00166	67532905	67632421	PITPNC1
chr3	23239388	23240135	0.78	5.16	-4.38	3.9e-05	0.00167	23208700	23270989	UBE2E2
chr13	55666832	55667750	-0.16	4.98	-5.14	3.9e-05	0.00167	55174454	55174548	MIR5007
chr22	40923365	40924755	1	5.28	-4.29	3.97e-05	0.0017	40951347	40964411	RBX1
chr8	8353614	8354017	-0.16	4.77	-4.93	3.98e-05	0.0017	8317736	8381747	PRAG1
chr4	153784142	153785020	-0.16	4.81	-4.97	3.98e-05	0.0017	153780591	153789083	SFRP2
chr5	34908363	34909036	-0.16	4.77	-4.93	3.98e-05	0.0017	34913871	34914801	RAD1
chr1	220012506	220013064	-0.16	4.89	-5.05	3.98e-05	0.0017	219997176	220007365	EPRS1
chr4	128281906	128286370	2.68	7.25	-4.58	3.99e-05	0.0017	128270871	128286787	PGRMC2
chr3	47091088	47092217	1.49	5.62	-4.12	3.99e-05	0.0017	47088184	47098451	SETD2
chr5	119467235	119468474	1.36	5.5	-4.15	3.99e-05	0.0017	119471661	119541994	HSD17B4
chr2	167641595	167642222	-0.16	4.83	-5	4e-05	0.0017	167815053	167941144	B3GALT1-AS1
chr2	68218182	68221568	2.8	7.47	-4.68	4e-05	0.0017	68180947	68251148	PPP3R1
chr3	107606288	107608492	2.63	6.49	-3.86	4e-05	0.0017	107599313	107805858	BBX
chr21	33646536	33646989	0.23	4.84	-4.62	4e-05	0.0017	33631493	33643926	CRYZL1
chr8	140704946	140705914	0.23	4.89	-4.67	4.01e-05	0.0017	140700770	140706168	PTK2
chr2	206279028	206280162	-0.16	4.84	-5	4.02e-05	0.00171	206279560	206313196	ZDBF2
chr9	6613809	6615989	2.55	6.42	-3.87	4.02e-05	0.00171	6605276	6623002	GLDC
chr22	29020282	29021971	2.16	6.32	-4.16	4.02e-05	0.00171	29024999	29031476	ZNRF3-AS1
chr6	89714256	89717166	2.25	6.53	-4.28	4.03e-05	0.00171	89673469	89675783	LOC101929057
chr8	102261209	102261797	0.24	4.88	-4.64	4.05e-05	0.00171	102253946	102261986	UBR5
chr6	159717077	159717540	-0.16	4.77	-4.93	4.05e-05	0.00171	159725585	159756319	WTAP
chr2	121366081	121368363	1.79	5.97	-4.18	4.06e-05	0.00172	121364119	121388076	CLASP1
chr1	28017577	28019376	1.03	5.35	-4.33	4.08e-05	0.00173	27988473	28011086	EYA3
chr2	119950618	119951826	-0.16	4.82	-4.99	4.1e-05	0.00173	119960792	119967872	PTPN4
chr5	37303984	37307358	2.4	6.77	-4.37	4.11e-05	0.00174	37301014	37303416	NUP155
chr5	141376753	141377595	-0.16	4.91	-5.07	4.11e-05	0.00174	141373993	141379642	PCDHGA6
chr6	167941726	167942283	-0.16	4.78	-4.94	4.12e-05	0.00174	167948029	167951421	AFDN
chr9	125827371	125828083	-0.16	4.76	-4.92	4.12e-05	0.00174	125843713	125965940	PBX3
[truncated: 7,208 more rows]

## Sheet: Cluster Identities
Chromosome	Start	End	Name	Cluster
chr22	40346499	40369367	NM_000026	Cluster1
chr15	90717345	90816166	NM_000057	Cluster1
chr9	129812941	129824136	NM_000113	Cluster1
chr2	127257289	127294144	NM_000122	Cluster1
chr16	89737548	89816647	NM_000135	Cluster1
chr6	121435645	121449727	NM_000165	Cluster1
chr19	34365195	34402413	NM_000175	Cluster1
chr2	47783144	47806953	NM_000179	Cluster1
chr7	65960685	65982213	NM_000181	Cluster1
chr2	74834126	74893358	NM_000189	Cluster1
chr19	48115444	48170344	NM_000234	Cluster1
chr6	31403594	31415315	NM_000247	Cluster1
chr2	47403155	47483223	NM_000251	Cluster1
chr17	51153558	51162089	NM_000269	Cluster1
chr13	100089092	100530434	NM_000282	Cluster1
chr19	33386949	33521791	NM_000285	Cluster1
chr16	8797838	8849325	NM_000303	Cluster1
chr5	150357696	150400293	NM_000356	Cluster1
chr9	132891348	132944616	NM_000368	Cluster1
chr3	124730451	124749272	NM_000373	Cluster1
chr17	19648750	19677596	NM_000382	Cluster1
chr6	36678713	36687332	NM_000389	Cluster1
chr22	42617839	42649392	NM_000398	Cluster1
chr3	32996616	33097146	NM_000404	Cluster1
chr6	137197484	137219385	NM_000416	Cluster1
chr17	2593653	2685615	NM_000430	Cluster1
chr19	1205777	1228431	NM_000455	Cluster1
chr15	25337233	25439056	NM_000462	Cluster1
chr15	72340923	72376014	NM_000520	Cluster1
chr19	11089462	11133820	NM_000527	Cluster1
chr3	136250339	136330169	NM_000532	Cluster1
chr3	10141777	10153666	NM_000551	Cluster1
chr8	31033809	31176137	NM_000553	Cluster1
chr8	30678065	30727846	NM_000637	Cluster1
chr20	34280267	34303355	NM_000687	Cluster1
chr12	111766932	111817531	NM_000690	Cluster1
chr1	116373243	116404774	NM_000701	Cluster1
chr19	41397817	41425002	NM_000709	Cluster1
chr20	1368977	1393054	NM_000801	Cluster1
chr21	33503932	33542117	NM_000819	Cluster1
chr2	85544719	85561493	NM_000821	Cluster1
chr1	228140278	228148984	NM_000858	Cluster1
chr15	98648538	98964530	NM_000875	Cluster1
chr6	159969098	160111502	NM_000876	Cluster1
chr17	81843165	81860535	NM_000918	Cluster1
chr17	7484365	7514614	NM_000937	Cluster1
chr4	56978895	57031158	NM_000938	Cluster1
chr7	75915154	75986855	NM_000941	Cluster1
chr2	68178856	68252532	NM_000945	Cluster1
chr1	92832039	92841924	NM_000969	Cluster1
chr1	6185019	6199595	NM_000983	Cluster1
chr3	12834485	12841565	NM_000994	Cluster1
chr4	108620557	108630483	NM_000995	Cluster1
chr10	100273277	100286364	NM_001001342	Cluster1
chr5	136132844	136182733	NM_001001419	Cluster1
chr5	136132844	136182734	NM_001001420	Cluster1
chr8	73786218	73878862	NM_001001481	Cluster1
chr21	42893308	42913299	NM_001001503	Cluster1
chr7	50590067	50732353	NM_001001549	Cluster1
chr7	50590067	50793453	NM_001001555	Cluster1
chr22	37608473	37633564	NM_001001560	Cluster1
chr19	39480837	39493779	NM_001001563	Cluster1
chr21	42653751	42775508	NM_001001567	Cluster1
chr21	42653751	42775508	NM_001001568	Cluster1
chr21	42653751	42775508	NM_001001569	Cluster1
chr21	42653751	42775508	NM_001001570	Cluster1
chr21	42653751	42775508	NM_001001571	Cluster1
chr21	42653751	42775508	NM_001001572	Cluster1
chr21	42653751	42775508	NM_001001573	Cluster1
chr21	42653751	42775508	NM_001001574	Cluster1
chr21	42653751	42775508	NM_001001575	Cluster1
chr21	42653751	42775508	NM_001001576	Cluster1
chr21	42653751	42775508	NM_001001577	Cluster1
chr21	42653751	42775508	NM_001001578	Cluster1
chr21	42653751	42775508	NM_001001579	Cluster1
chr21	42653751	42775508	NM_001001580	Cluster1
chr21	42653751	42775508	NM_001001581	Cluster1
chr21	42653751	42775508	NM_001001582	Cluster1
chr21	42653751	42775508	NM_001001583	Cluster1
chr21	42653751	42775508	NM_001001584	Cluster1
chr21	42653751	42775508	NM_001001585	Cluster1
chr18	46080247	46098296	NM_001001935	Cluster1
chr10	7788176	7807799	NM_001001973	Cluster1
chr1	11066618	11099869	NM_001001998	Cluster1
chr2	18562870	18589569	NM_001002006	Cluster1
chr7	33014112	33062776	NM_001002009	Cluster1
chr12	53665169	53676330	NM_001002031	Cluster1
chr17	75135248	75154512	NM_001002032	Cluster1
chr17	81891712	81900533	NM_001002244	Cluster1
chr17	81891712	81900533	NM_001002245	Cluster1
chr17	81891712	81900533	NM_001002246	Cluster1
chr17	81891712	81900533	NM_001002247	Cluster1
chr17	81891712	81900533	NM_001002248	Cluster1
chr10	97738476	97760907	NM_001002261	Cluster1
chr10	97737127	97760895	NM_001002262	Cluster1
chr10	72332834	72354919	NM_001002762	Cluster1
chr19	56087365	56121295	NM_001002836	Cluster1
chr16	69118008	69132588	NM_001002847	Cluster1
chr14	93237549	93333036	NM_001002860	Cluster1
chr22	29505878	29553757	NM_001002877	Cluster1
chr22	29508166	29553655	NM_001002878	Cluster1
chr22	29508166	29553655	NM_001002879	Cluster1
chr17	44395280	44503406	NM_001002909	Cluster1
chr3	9731734	9748015	NM_001003694	Cluster1
chr21	25724479	25735654	NM_001003696	Cluster1
chr21	25724479	25735654	NM_001003697	Cluster1
chr21	25724479	25735654	NM_001003701	Cluster1
chr7	144186082	144195833	NM_001003702	Cluster1
chr21	25724479	25735654	NM_001003703	Cluster1
chr7	99458157	99466167	NM_001003713	Cluster1
chr7	99458157	99466167	NM_001003714	Cluster1
chr22	41673932	41688867	NM_001003796	Cluster1
chr9	92711362	92764833	NM_001003800	Cluster1
chr4	82353313	82373996	NM_001003810	Cluster1
chr22	20507609	20587619	NM_001003891	Cluster1
chr20	37289654	37317260	NM_001003897	Cluster1
chr7	44606626	44676578	NM_001003941	Cluster1
chr5	177426675	177441353	NM_001004105	Cluster1
chr13	52012397	52033600	NM_001004127	Cluster1
chr19	53467732	53496255	NM_001004301	Cluster1
chr2	105745062	105894274	NM_001004722	Cluster1
chr11	75399517	75406906	NM_001005	Cluster1
chr11	5131691	5132642	NM_001005160	Cluster1
chr11	4367262	4368386	NM_001005161	Cluster1
chr11	5580876	5581884	NM_001005162	Cluster1
chr11	5488684	5489748	NM_001005163	Cluster1
chr11	5058649	5059627	NM_001005164	Cluster1
chr11	5884292	5885231	NM_001005165	Cluster1
chr11	5900764	5901760	NM_001005166	Cluster1
chr11	5840927	5841897	NM_001005167	Cluster1
chr11	5856748	5857702	NM_001005168	Cluster1
chr11	4594038	4595013	NM_001005169	Cluster1
chr11	4586790	4587905	NM_001005170	Cluster1
chr11	4488878	4489908	NM_001005171	Cluster1
chr11	4449294	4450361	NM_001005172	Cluster1
chr11	5985891	5986985	NM_001005173	Cluster1
chr11	5820335	5821301	NM_001005174	Cluster1
chr11	5754692	5755729	NM_001005175	Cluster1
chr2	230225735	230239076	NM_001005176	Cluster1
chr11	4803432	4804380	NM_001005177	Cluster1
chr11	6199223	6200186	NM_001005178	Cluster1
chr11	6001850	6003192	NM_001005179	Cluster1
chr11	5736447	5738523	NM_001005180	Cluster1
chr11	6107683	6108835	NM_001005181	Cluster1
chr12	55320599	55321538	NM_001005182	Cluster1
chr12	55426253	55427192	NM_001005183	Cluster1
chr1	158754815	158755847	NM_001005184	Cluster1
chr1	158765743	158766682	NM_001005185	Cluster1
chr11	58030952	58031906	NM_001005186	Cluster1
chr11	123942866	123943838	NM_001005187	Cluster1
[truncated: 98,796 more rows]

## Sheet: M, WT v RNF20 Het1, WT up
Chromosome	Start	End	Mean Concentration of Reads in WT	Mean Concentration of Reads in RNF20 Het1	Fold	p-value	FDR	Gene Start	Gene End	SYMBOL
[truncated: 84 more rows]

[truncated: 3 more sheets: M, WT v RNF20 Het1, WT down, M, WT v RNF20 Het2, WT up, M, WT v RNF20 Het2, WT down]
