# Supplementary material for: Dynamic tissue-specific H2Bub1 is required for human and mouse cardiogenesis
Source: Research Square preprint supplement (doi:10.21203/rs.3.rs-1498907/v1), 2022-04-01
Supplement: Supplementary file 2 [file 4b7f3cf8e87f818301bac45a.xlsx]

## Sheet: iPSC, WT v RNF20 Het1, WT up
ext_gene	target_id	pval	qval	b	se_b	mean_obs	var_obs	tech_var	sigma_sq	smooth_sigma_sq	final_sigma_sq
AL512646.1	ENST00000269395.6	6.02328e-67	3.985e-62	-4.15754	0.240518	5.27256	4.50458	0.0213229	0.0654506	0.0258022	0.0654506
FOS	ENST00000303562.9	3.3823e-27	2.79716e-23	-1.8538	0.171623	5.11183	1.19617	0.0157511	0.0134273	0.0284304	0.0284304
B2M	ENST00000561424.5	3.18312e-24	1.75496e-20	-2.28628	0.225162	6.23875	1.17663	0.00378118	0.0722659	0.0151493	0.0722659
B2M	ENST00000631728.1	3.18312e-24	1.75496e-20	-2.28628	0.225162	6.23875	1.17663	0.00378118	0.0722659	0.0151493	0.0722659
RPL21	ENST00000493317.1	4.89534e-24	2.3134e-20	-2.01359	0.199132	6.95747	0.874594	0.0477337	-0.000381735	0.0117465	0.0117465
PABPC1	ENST00000519596.5	6.55531e-23	2.71062e-19	-0.896916	0.0910161	8.02381	0.169728	0.0025895	0.00665803	0.00983639	0.00983639
KMT2A	ENST00000534358.6	3.45592e-18	1.14322e-14	-0.855274	0.0983593	7.51299	0.190091	0.00418303	0.00371303	0.0103288	0.0103288
MSH6	ENST00000538136.1	6.91683e-18	2.17913e-14	-0.988425	0.114716	8.19716	0.259866	0.00428669	0.015453	0.00982927	0.015453
B2M	ENST00000544417.5	3.21371e-17	9.2443e-14	-1.4114	0.167257	6.20656	0.488532	0.0266104	0.00594567	0.0153521	0.0153521
BRWD1	ENST00000342449.7	1.22721e-16	3.2477e-13	-0.781349	0.0943608	7.03182	0.116989	0.00185953	0.00144837	0.0114964	0.0114964
VASH2	ENST00000366968.8	1.30232e-16	3.31391e-13	-0.741794	0.0896606	7.72912	0.124652	0.00202573	0.006051	0.0100328	0.0100328
SON	ENST00000436227.5	1.54316e-16	3.78132e-13	-0.785283	0.0951499	7.67149	0.122949	0.00348142	0.00448539	0.0100988	0.0100988
NFE2L3	ENST00000606261.1	9.07033e-16	2.00031e-12	-0.796555	0.0990885	7.17299	0.218092	0.00356163	0.0111662	0.0110757	0.0111662
ROCK1	ENST00000635540.1	1.04105e-15	2.22181e-12	-0.678252	0.0845499	7.74675	0.0924979	0.000708595	0.00265656	0.0100144	0.0100144
NCL	ENST00000494618.1	4.10175e-15	8.22338e-12	-1.11933	0.142557	7.79177	0.31997	0.00191207	0.0285716	0.00997138	0.0285716
NMNAT3	ENST00000645507.1	4.41792e-15	8.59675e-12	-0.666991	0.0850487	7.60359	0.0925561	0.000661325	0.00501178	0.0101886	0.0101886
SOD2	ENST00000538183.7	1.30505e-14	2.33357e-11	-0.661043	0.0857903	7.64715	0.0878773	0.000910443	0.00392959	0.0101295	0.0101295
NAP1L1	ENST00000547773.5	1.52271e-14	2.65111e-11	-0.828754	0.107832	7.42128	0.147214	0.00453193	0.0129097	0.0104952	0.0129097
DCP2	ENST00000389063.3	8.0087e-14	1.20422e-10	-0.660484	0.0884161	7.96442	0.0914746	0.00186891	0.00977456	0.00985721	0.00985721
BEX3	ENST00000372634.1	9.67366e-14	1.37796e-10	-1.14335	0.153567	6.58547	0.261854	0.0220725	-0.00474789	0.0133015	0.0133015
DEK	ENST00000651992.1	1.05422e-13	1.45307e-10	-1.29183	0.173774	7.25408	0.395705	0.0344318	-0.0220471	0.0108645	0.0108645
ST13	ENST00000620312.4	1.3669e-13	1.8456e-10	-0.807099	0.109075	6.81517	0.141683	0.00556267	0.0056766	0.0122833	0.0122833
PPIG	ENST00000448752.6	1.7973e-13	2.33156e-10	-0.657133	0.0892471	7.55235	0.0970559	0.00168259	0.00607629	0.010265	0.010265
SMG1	ENST00000569764.1	2.05682e-13	2.61691e-10	-1.19494	0.162687	4.95698	0.299951	0.00824767	0.0290732	0.031453	0.031453
TMEM132B	ENST00000299308.7	2.90682e-13	3.5614e-10	-1.09495	0.150021	5.25786	0.249545	0.00773219	0.0135321	0.0260272	0.0260272
SET	ENST00000372686.5	4.98714e-13	5.68878e-10	-0.904965	0.125243	8.30812	0.257572	0.00425354	0.0192753	0.00986677	0.0192753
WNK3	ENST00000375169.7	9.02388e-13	9.32843e-10	-0.719038	0.10064	6.69966	0.107598	0.00241421	0.00567933	0.0127785	0.0127785
H3-3B	ENST00000593254.1	1.2716e-12	1.29429e-09	-0.638092	0.0899055	7.52036	0.0997872	0.00180798	0.00500072	0.0103165	0.0103165
CALM2	ENST00000272298.12	1.39272e-12	1.3961e-09	-0.593705	0.0838002	8.6929	0.0717742	0.000274914	0.00700886	0.0102588	0.0102588
CHD1	ENST00000284049.7	2.44339e-12	2.27682e-09	-0.623997	0.0890597	7.42623	0.0884247	0.00141186	0.0101617	0.0104856	0.0104856
PCSK5	ENST00000376767.7	2.54965e-12	2.31075e-09	-0.7208	0.102963	6.50534	0.11042	0.00221564	0.0037463	0.0136865	0.0136865
B2M	ENST00000559220.1	2.6619e-12	2.34815e-09	-6.9883	0.999112	4.07249	10.2898	1.20607	0.29127	0.0751112	0.29127
YBX1	ENST00000467957.1	3.74113e-12	3.17325e-09	-0.59405	0.0855162	7.91477	0.0723993	0.00108771	0.00712578	0.00988183	0.00988183
QSER1	ENST00000399302.7	4.95713e-12	4.04893e-09	-0.785377	0.113711	8.14041	0.162677	0.00286962	0.0165255	0.00982281	0.0165255
AC124312.1	ENST00000551312.6	6.05905e-12	4.77223e-09	-0.930905	0.13534	6.66603	0.188684	0.00266321	0.0248123	0.0129301	0.0248123
DEK	ENST00000652576.1	7.44629e-12	5.7151e-09	-0.697491	0.101841	7.54525	0.113845	0.00353917	0.0120182	0.0102762	0.0120182
MIPOL1	ENST00000555870.5	9.82627e-12	7.38757e-09	-0.72805	0.106924	6.29193	0.108566	0.00232053	0.00637883	0.0148287	0.0148287
B2M	ENST00000349264.10	1.16839e-11	8.49456e-09	-1.74095	0.256623	6.5141	0.686079	0.00871103	0.0900722	0.0136435	0.0900722
CTSC	ENST00000527018.5	1.83954e-11	1.22933e-08	-1.22675	0.182601	6.11805	0.323767	0.0239391	0.0260756	0.0159481	0.0260756
TNRC6B	ENST00000335727.13	2.1521e-11	1.42383e-08	-0.729982	0.109029	7.67066	0.137695	0.00773104	0.00818753	0.0100999	0.0100999
OR7E12P	ENST00000344740.4	2.19625e-11	1.42455e-08	-1.17236	0.175179	5.0846	0.299683	0.0067466	0.0392852	0.0289202	0.0392852
ZNF558	ENST00000301475.1	2.75301e-11	1.68118e-08	-2.64519	0.397223	4.23772	2.0719	0.175016	0.0516768	0.0616638	0.0616638
BPTF	ENST00000424123.7	3.29432e-11	1.98138e-08	-0.772621	0.116485	8.18309	0.13034	0.0027683	0.0175849	0.00982687	0.0175849
NA	ENST00000540828.6	4.50789e-11	2.59341e-08	-0.748914	0.113707	6.83705	0.13161	0.00449648	0.0148975	0.0121956	0.0148975
SON	ENST00000492229.1	4.93082e-11	2.78823e-08	-1.59714	0.242984	4.55325	0.522661	0.0447802	-0.00920769	0.0437817	0.0437817
NME2	ENST00000513177.5	5.2362e-11	2.91115e-08	-0.687762	0.104777	7.66863	0.106144	0.00636492	0.00889925	0.0101024	0.0101024
KDM5B	ENST00000649542.1	9.07075e-11	4.68845e-08	-0.65929	0.101716	8.3224	0.0918474	0.00564519	0.00709027	0.009874	0.009874
ATP11C	ENST00000327569.7	1.01763e-10	5.06215e-08	-0.601583	0.0930622	7.29598	0.0761405	0.00222714	0.00801921	0.0107637	0.0107637
USP9X	ENST00000324545.8	1.07711e-10	5.31805e-08	-1.00359	0.155458	7.8722	0.294307	0.0164453	0.0198056	0.0099082	0.0198056
CAPRIN1	ENST00000533657.5	1.49427e-10	7.26917e-08	-0.678617	0.105935	7.42565	0.126934	0.00248277	0.0143506	0.0104867	0.0143506
MSANTD3-TMEFF1	ENST00000502978.1	1.96704e-10	9.29565e-08	-1.53126	0.240618	6.4842	0.505606	0.021381	0.0654642	0.0137914	0.0654642
DIAPH2	ENST00000324765.13	2.09058e-10	9.80943e-08	-0.597426	0.0940158	7.36486	0.0820528	0.000764633	0.0124938	0.0106101	0.0124938
PDS5B	ENST00000450460.5	2.44744e-10	1.09407e-07	-0.693822	0.109604	6.60992	0.104688	0.00483222	0.0121174	0.0131874	0.0131874
RPL23	ENST00000245857.9	4.02356e-10	1.73986e-07	-0.619629	0.0990913	8.15284	0.0856716	0.000979205	0.0137494	0.00982349	0.0137494
KLRK1	ENST00000240618.11	4.26193e-10	1.81916e-07	-2.92615	0.468626	3.25476	1.98544	0.125168	-0.0163063	0.204247	0.204247
RIF1	ENST00000243326.9	4.63885e-10	1.95482e-07	-0.604556	0.0970261	7.619	0.0799369	0.00101908	0.013102	0.0101671	0.013102
ATAD5	ENST00000321990.5	4.79175e-10	2.00647e-07	-0.607791	0.0976249	6.81822	0.077358	0.002025	0.00744984	0.0122709	0.0122709
PAWR	ENST00000547699.1	5.04215e-10	2.08493e-07	-1.33099	0.214061	4.73128	0.374886	0.0314425	-0.0155133	0.0372906	0.0372906
SAMD12	ENST00000445741.6	5.18894e-10	2.11914e-07	-0.783021	0.126024	5.7848	0.130389	0.00494425	0.00175152	0.0188788	0.0188788
RIF1	ENST00000428287.6	5.38349e-10	2.16641e-07	-0.856939	0.138049	7.25797	0.159481	0.0146449	0.0139413	0.0108549	0.0139413
CCNG1	ENST00000511683.6	5.40293e-10	2.16641e-07	-0.726872	0.117107	6.86021	0.112616	0.00846607	0.00577925	0.0121048	0.0121048
SUB1	ENST00000502897.5	5.67134e-10	2.26034e-07	-0.678383	0.109429	7.14023	0.113215	0.00155665	0.0164054	0.0111672	0.0164054
RAPGEF6	ENST00000509018.5	5.77216e-10	2.27313e-07	-0.690733	0.111471	6.36865	0.0962869	0.00424436	0.00485244	0.0143943	0.0143943
ADAM32	ENST00000518259.1	5.74841e-10	2.27313e-07	-0.960067	0.15492	5.2926	0.197607	0.0105012	0.021305	0.0254992	0.0254992
DAZAP1	ENST00000592453.2	8.67457e-10	3.24243e-07	-0.940892	0.153438	6.52049	0.226884	0.0217025	-0.00549532	0.0136124	0.0136124
ASTN2	ENST00000358637.4	1.04239e-09	3.81019e-07	-0.705706	0.115637	5.97324	0.101013	0.00298924	0.00643911	0.0170686	0.0170686
HNRNPDL	ENST00000602300.5	1.10483e-09	4.01624e-07	-1.12544	0.184695	8.07242	0.277833	0.00121354	0.049955	0.00982634	0.049955
CCAR1	ENST00000540210.5	1.18539e-09	4.28554e-07	-0.942213	0.154913	6.48135	0.190534	0.0221915	0.00115462	0.0138056	0.0138056
HSPH1	ENST00000630972.2	1.4363e-09	5.13652e-07	-0.931698	0.153965	7.09629	0.277862	0.00649989	0.029058	0.0112957	0.029058
HSP90AA1	ENST00000554401.1	1.99813e-09	6.71047e-07	-1.89107	0.315285	4.67776	0.799209	0.110079	-0.0439343	0.039028	0.039028
ETNK1	ENST00000266517.8	2.02782e-09	6.7758e-07	-0.766901	0.127911	6.75213	0.130651	0.00144033	0.0231017	0.0125469	0.0231017
FRK	ENST00000606080.2	2.25291e-09	7.45264e-07	-0.70021	0.117123	5.90059	0.104093	0.00286351	0.0129067	0.0177131	0.0177131
RPL32	ENST00000457131.1	2.44714e-09	7.97551e-07	-0.606876	0.10174	7.98973	0.0781833	0.00567948	0.000415465	0.00984719	0.00984719
PPP2CA	ENST00000522385.1	2.47576e-09	7.98252e-07	-0.709731	0.119021	6.09571	0.118173	0.00514086	0.0141166	0.0161083	0.0161083
RAB11A	ENST00000569896.1	2.64611e-09	8.3764e-07	-0.898582	0.150967	5.73131	0.173116	0.0147032	0.00122386	0.0194835	0.0194835
RBFOX2	ENST00000405409.6	2.69074e-09	8.47712e-07	-0.805808	0.135443	7.28477	0.142279	0.016727	0.0106344	0.0107901	0.0107901
PDK1	ENST00000410055.5	3.01448e-09	9.45204e-07	-0.753196	0.126997	5.97	0.199461	0.00627795	0.0179145	0.017096	0.0179145
RFX3	ENST00000617270.4	3.24467e-09	9.93832e-07	-0.728343	0.123058	6.09001	0.140016	0.00656492	0.0065538	0.0161499	0.0161499
AC010615.1	ENST00000594254.1	3.68597e-09	1.09849e-06	-0.901316	0.152825	5.60268	0.192559	0.00394238	0.0310908	0.0211365	0.0310908
RBBP4	ENST00000373493.10	3.9476e-09	1.16077e-06	-0.690132	0.117242	7.75002	0.107399	0.000535452	0.0200832	0.0100111	0.0200832
HNRNPU	ENST00000649899.1	4.15177e-09	1.19427e-06	-0.938794	0.159712	6.12821	0.197114	0.00888072	0.0293813	0.0158766	0.0293813
PABPC4	ENST00000470443.5	4.79934e-09	1.36276e-06	-1.1218	0.19163	5.54701	0.352102	0.0331845	0.0112446	0.0218986	0.0218986
LMNB1	ENST00000504788.5	5.92252e-09	1.65331e-06	-0.627361	0.107814	7.78873	0.145231	0.00201393	0.0154218	0.00997411	0.0154218
AGO3	ENST00000373191.9	7.17752e-09	1.90995e-06	-0.725364	0.12535	5.86456	0.116391	0.00363031	0.0199386	0.0180564	0.0199386
UNC5D	ENST00000287272.6	7.39926e-09	1.95034e-06	-1.16338	0.201221	6.97267	0.302258	0.0182743	0.0424606	0.0116937	0.0424606
PAN3	ENST00000399613.1	7.50511e-09	1.97039e-06	-0.862748	0.149285	6.38297	0.170414	0.018072	0.0153568	0.0143165	0.0153568
C1QBP	ENST00000574444.5	7.59977e-09	1.98114e-06	-0.642811	0.111269	8.13971	0.122742	0.00154349	0.0170276	0.00982278	0.0170276
KTN1	ENST00000438792.6	8.24135e-09	2.11651e-06	-0.835212	0.144915	7.28274	0.161984	0.0138936	0.017607	0.010795	0.017607
AP1S2	ENST00000450644.1	8.25364e-09	2.11651e-06	-1.09882	0.190661	4.95039	0.296445	0.0229313	0.0140398	0.031596	0.031596
OR5AS1	ENST00000641320.1	1.05121e-08	2.58544e-06	-0.801696	0.140102	5.37429	0.13189	0.00513957	0.00882815	0.0243031	0.0243031
EIF1AXP1	ENST00000419267.1	1.12895e-08	2.74602e-06	-0.812634	0.142315	5.6123	0.171332	0.00937547	0.0202883	0.0210047	0.0210047
ZBED1	ENST00000381222.8	1.14789e-08	2.78186e-06	-5.64386	0.988885	4.81331	8.73631	1.42308	0.0437596	0.0349199	0.0437596
TARDBP	ENST00000639083.1	1.1656e-08	2.81446e-06	-0.700695	0.122828	7.61711	0.109844	0.00141803	0.0212121	0.0101697	0.0212121
HNRNPA1	ENST00000547276.5	1.18221e-08	2.82554e-06	-0.910191	0.159619	6.92515	0.207604	0.0116258	0.0265916	0.0118615	0.0265916
SPINK9	ENST00000511717.6	1.22948e-08	2.90437e-06	-0.816236	0.14331	5.27155	0.165683	0.00498923	0.0219579	0.0258175	0.0258175
FSIP2	ENST00000429412.1	1.29172e-08	3.03049e-06	-0.707739	0.124445	5.86864	0.110765	0.00521327	0.00311874	0.0180166	0.0180166
ZNF117	ENST00000620222.4	1.30633e-08	3.05395e-06	-0.788764	0.138739	5.55575	0.12694	0.00709376	0.00599645	0.021779	0.021779
NUP153	ENST00000262077.2	1.42751e-08	3.27931e-06	-0.642656	0.113342	7.95817	0.0945432	0.00185516	0.0174145	0.00985995	0.0174145
PAICS	ENST00000514888.5	1.48351e-08	3.37283e-06	-0.836395	0.147683	8.29944	0.18276	0.0196743	0.013041	0.00986264	0.013041
CCL5	ENST00000605140.6	1.51145e-08	3.42458e-06	-3.1333	0.55356	3.27069	2.62856	0.259485	-0.0785786	0.200159	0.200159
ZNF37A	ENST00000361085.9	1.5972e-08	3.54599e-06	-0.699514	0.123791	6.14799	0.109551	0.00724646	0.01362	0.0157397	0.0157397
TOPORS	ENST00000379858.1	1.89446e-08	4.08264e-06	-0.695416	0.123709	6.80022	0.130831	0.00718921	0.0157668	0.0123443	0.0157668
CD53	ENST00000271324.6	2.19053e-08	4.64504e-06	-5.48858	0.980762	1.82683	6.60907	0.5988	0.530961	0.84404	0.84404
ZNF66	ENST00000344519.9	2.24607e-08	4.73249e-06	-1.19115	0.213014	5.21702	0.317084	0.00676792	0.0612947	0.0266668	0.0612947
LPAR4	ENST00000607964.1	2.32875e-08	4.89112e-06	-1.04762	0.187557	5.67403	0.375029	0.0152079	0.0375585	0.0201838	0.0375585
CDV3	ENST00000420115.6	2.37697e-08	4.92978e-06	-0.718251	0.128671	7.25728	0.127242	0.00314585	0.0216887	0.0108566	0.0216887
TOP2B	ENST00000264331.8	2.43665e-08	5.03778e-06	-1.08286	0.19414	7.40937	0.281304	0.0309085	0.025627	0.0105186	0.025627
EEF1A1	ENST00000488500.1	2.51774e-08	5.15707e-06	-0.922871	0.165625	10.1508	0.194411	0.00036146	0.0407861	0.0166489	0.0407861
NPIPB5	ENST00000536620.1	2.53115e-08	5.16514e-06	-1.33202	0.239094	4.1593	0.394018	0.0180951	0.0533899	0.0676538	0.0676538
WWC3	ENST00000380861.8	2.77155e-08	5.59042e-06	-1.35194	0.243362	4.246	0.592932	0.0172958	0.0715416	0.0610714	0.0715416
NOL8	ENST00000360868.7	3.00068e-08	5.94387e-06	-4.99005	0.900504	2.27071	5.32591	0.637252	-0.420616	0.579108	0.579108
BX322639.1	ENST00000609841.1	3.10502e-08	6.09579e-06	-0.741038	0.133872	5.95221	0.112112	0.0096338	-0.000963886	0.0172489	0.0172489
SRSF11	ENST00000463859.5	3.97929e-08	7.52199e-06	-0.661857	0.120518	6.55663	0.10441	0.00435007	0.0174368	0.0134381	0.0174368
ZNF480	ENST00000595962.6	4.2836e-08	8.02841e-06	-0.705486	0.128768	6.94467	0.115166	0.00134975	0.023522	0.0117916	0.023522
ARHGAP26	ENST00000646213.1	4.39175e-08	8.18473e-06	-1.03726	0.189477	4.61228	0.268412	0.0124604	0.0212412	0.041392	0.041392
WAPL	ENST00000618527.4	4.56988e-08	8.38842e-06	-7.7562	1.41866	3.36896	14.3224	1.76398	1.25491	0.176721	1.25491
BRWD1	ENST00000333229.6	4.66376e-08	8.52359e-06	-0.609814	0.111612	6.42555	0.0818454	0.00459545	-0.00215285	0.0140906	0.0140906
SEPHS1	ENST00000378614.8	4.94792e-08	8.89549e-06	-1.10489	0.202614	5.52449	0.370558	0.0393715	0.016766	0.0222074	0.0222074
PSMD6	ENST00000482510.5	5.10333e-08	9.11491e-06	-1.85992	0.341415	6.06156	0.804978	0.158485	-0.0515753	0.0163617	0.0163617
EEA1	ENST00000322349.12	5.1425e-08	9.14591e-06	-0.631344	0.115921	6.51271	0.0901109	0.00203367	0.018123	0.0136504	0.018123
PAICS	ENST00000512576.2	5.65324e-08	9.86856e-06	-0.841958	0.155073	5.66861	0.163182	0.00680524	0.0292662	0.020253	0.0292662
STMN1	ENST00000357865.6	5.64732e-08	9.86856e-06	-7.40128	1.36313	2.84536	12.4206	0.780557	2.00663	0.332198	2.00663
CPSF6	ENST00000456847.7	5.79827e-08	1.00422e-05	-1.06514	0.196342	6.3317	0.265716	0.0432255	0.000536816	0.0145996	0.0145996
MAPK1IP1L	ENST00000395468.9	5.97927e-08	1.03018e-05	-0.718392	0.132559	6.81452	0.122377	0.00204596	0.0243118	0.0122859	0.0243118
SCOC	ENST00000394201.8	6.49233e-08	1.10137e-05	-0.585371	0.108308	6.48688	0.0793988	0.00381796	0.011578	0.013778	0.013778
ANP32A	ENST00000267918.9	6.59499e-08	1.11307e-05	-0.681778	0.126211	6.80514	0.105895	0.0053542	0.0185398	0.0123241	0.0185398
MRPL3	ENST00000511168.5	6.65291e-08	1.11432e-05	-1.36585	0.25292	6.66478	0.443827	0.0296971	0.0662561	0.0129358	0.0662561
CEP290	ENST00000552810.6	6.81669e-08	1.136e-05	-0.810604	0.150225	5.82267	0.152306	0.0108588	0.0229924	0.0184771	0.0229924
LAPTM5	ENST00000294507.4	6.95926e-08	1.15395e-05	-3.65145	0.67717	2.18506	7.21264	0.0632413	0.00729164	0.624598	0.624598
NA	ENST00000638879.2	6.95621e-08	1.15395e-05	-0.620762	0.11512	6.0044	0.0864916	0.00306877	0.011162	0.0168102	0.0168102
DBF4	ENST00000431138.5	7.46325e-08	1.23134e-05	-0.605241	0.112506	6.56302	0.113946	0.00557871	-0.00428792	0.0134076	0.0134076
ANKRD12	ENST00000400020.7	7.59381e-08	1.24977e-05	-0.683397	0.127108	6.99747	0.118933	0.00184764	0.0223868	0.0116094	0.0223868
MYEF2	ENST00000324324.12	7.70019e-08	1.26413e-05	-0.853138	0.158752	5.3739	0.221956	0.0134947	0.0218219	0.0243087	0.0243087
TUT7	ENST00000375963.8	7.87716e-08	1.2868e-05	-0.622828	0.115985	6.607	0.091438	0.00455596	0.0156227	0.0132009	0.0156227
CALN1	ENST00000405452.3	8.11115e-08	1.31528e-05	-6.61662	1.23338	3.09551	9.03109	2.03253	-1.58751	0.249303	0.249303
CD44	ENST00000263398.10	8.44971e-08	1.36018e-05	-1.01433	0.189337	4.76371	0.561841	0.017459	0.0329549	0.0363139	0.0363139
AC139769.1	ENST00000472297.2	9.3048e-08	1.46291e-05	-0.744061	0.139342	5.46874	0.296896	0.00512596	0.0239985	0.0229755	0.0239985
DHX36	ENST00000496811.6	9.30906e-08	1.46291e-05	-0.63451	0.118828	6.62325	0.0986794	0.00321661	0.0179637	0.0131257	0.0179637
ZNF148	ENST00000360647.8	1.00717e-07	1.56419e-05	-0.668204	0.125474	5.77653	0.104228	0.00464636	0.0179312	0.0189694	0.0189694
GCSH	ENST00000640150.1	1.06346e-07	1.64007e-05	-6.51648	1.22593	2.45678	9.67927	0.603798	1.65057	0.487658	1.65057
ARHGDIB	ENST00000228945.9	1.07601e-07	1.65439e-05	-3.9582	0.744947	3.07646	6.46547	0.577249	0.0415068	0.25517	0.25517
PSMD12	ENST00000584008.5	1.10776e-07	1.69156e-05	-0.589987	0.111149	6.76071	0.127499	0.00362806	0.0149029	0.01251	0.0149029
NPIPB5	ENST00000356156.7	1.18418e-07	1.78454e-05	-1.30299	0.246037	4.11856	0.355415	0.0197597	0.0295609	0.0710416	0.0710416
ACSL3	ENST00000407441.4	1.18951e-07	1.78454e-05	-1.12699	0.212836	4.93492	0.340537	0.0360114	-0.0120838	0.0319374	0.0319374
FNDC3A	ENST00000398316.7	1.44482e-07	2.10549e-05	-0.963996	0.183288	6.1701	0.221787	0.0348014	0.0103866	0.0155904	0.0155904
SACS	ENST00000402364.1	1.57149e-07	2.26022e-05	-1.31214	0.250218	6.99857	0.365187	0.082308	-0.027942	0.0116057	0.0116057
EIF2A	ENST00000477551.5	1.70847e-07	2.43605e-05	-6.3626	1.2169	2.60596	8.59558	1.79902	-0.500519	0.422229	0.422229
VPS13C	ENST00000249837.7	1.73754e-07	2.46686e-05	-0.623022	0.119229	6.9346	0.102436	0.00526267	0.0160606	0.0118275	0.0160606
SINHCAFP3	ENST00000524174.1	1.78615e-07	2.52504e-05	-0.743935	0.142508	5.65076	0.20092	0.00997757	0.00699082	0.0204851	0.0204851
PPIP5K2	ENST00000321521.13	1.81162e-07	2.54474e-05	-0.849815	0.162872	5.08309	0.153732	0.0108429	0.0105223	0.0289478	0.0289478
MED21	ENST00000282892.4	1.98308e-07	2.76212e-05	-0.598608	0.115097	6.17845	0.082028	0.00433587	0.00828191	0.015535	0.015535
NA	ENST00000647132.1	2.07979e-07	2.85475e-05	-0.646209	0.124461	5.83336	0.0845159	0.00486834	0.000909601	0.0183674	0.0183674
CD3G	ENST00000532917.2	2.15539e-07	2.93416e-05	-3.17	0.61133	3.03889	2.88974	0.293589	-0.207028	0.266997	0.266997
SNTB2	ENST00000336278.8	2.21319e-07	3.00234e-05	-0.615843	0.118878	5.86545	0.0833613	0.00315015	0.012378	0.0180477	0.0180477
SEPTIN10	ENST00000397714.6	2.21455e-07	3.00234e-05	-0.786558	0.151835	6.59121	0.155371	0.021306	0.00598814	0.0132746	0.0132746
NPM1	ENST00000517671.5	2.26816e-07	3.04384e-05	-0.593343	0.114636	10.4689	0.0824153	6.0585e-05	0.00596785	0.0196514	0.0196514
PDCD10	ENST00000497056.6	2.32603e-07	3.1091e-05	-0.655705	0.1268	6.46613	0.0994906	0.0057764	0.0183408	0.0138822	0.0183408
BX322639.1	ENST00000423987.2	2.4331e-07	3.20027e-05	-0.840534	0.162806	5.83675	0.165867	0.00731829	0.0324406	0.018333	0.0324406
RPL17	ENST00000615479.4	2.44274e-07	3.20658e-05	-0.590244	0.114343	6.75615	0.0931669	0.00708193	-0.00172545	0.0125296	0.0125296
SSR1	ENST00000397511.6	2.72843e-07	3.51194e-05	-0.597648	0.116244	6.91744	0.120603	0.00233315	0.017936	0.0118896	0.017936
P4HB	ENST00000476482.1	2.91095e-07	3.71344e-05	-5.8711	1.14466	2.10562	7.97921	0.679867	1.2855	0.669039	1.2855
OR14J1	ENST00000641895.1	2.96544e-07	3.77295e-05	-0.692922	0.135188	5.4458	0.114055	0.0041194	0.0176956	0.0232942	0.0232942
PPP2R5E	ENST00000556484.5	3.2013e-07	4.01132e-05	-5.06999	0.991938	3.04268	5.7383	1.21012	-0.541734	0.265788	0.265788
SLTM	ENST00000249736.11	3.45335e-07	4.29462e-05	-0.658113	0.129121	6.26349	0.100172	0.00916627	0.0158422	0.014998	0.0158422
MATR3	ENST00000502422.5	3.8306e-07	4.7019e-05	-0.758086	0.149312	6.73489	0.255996	0.0208193	0.00174403	0.0126219	0.0126219
CCDC90B	ENST00000525504.5	4.11052e-07	4.96262e-05	-0.827989	0.163512	5.07225	0.15705	0.0109569	0.0268032	0.0291476	0.0291476
GTF2I	ENST00000620879.4	4.25852e-07	5.12281e-05	-0.654957	0.129514	8.05841	0.114471	0.00474672	0.0204142	0.00982859	0.0204142
APAF1	ENST00000547045.5	4.35086e-07	5.21473e-05	-5.90215	1.16807	2.07975	7.652	1.36253	0.0360483	0.684035	0.684035
PUM2	ENST00000319801.9	4.36346e-07	5.22037e-05	-0.858334	0.169887	6.46289	0.153631	0.0293939	-0.0161581	0.0138986	0.0138986
CUL1	ENST00000602748.5	4.93525e-07	5.77905e-05	-0.807173	0.16051	6.73072	0.157437	0.0260049	0.00280183	0.0126402	0.0126402
TUNAR	ENST00000504119.1	5.21812e-07	6.04425e-05	-0.720572	0.143594	6.65113	0.123341	0.0179311	0.0129118	0.0129978	0.0129978
ZNF91	ENST00000397082.2	5.24744e-07	6.04827e-05	-0.996071	0.198538	5.47837	0.267746	0.0362835	0.0178584	0.0228423	0.0228423
PPARA	ENST00000624793.1	5.29748e-07	6.09533e-05	-0.719641	0.143492	5.92826	0.134864	0.00304754	0.0278372	0.0174603	0.0278372
HLA-DQA1	ENST00000474698.5	5.42917e-07	6.2252e-05	-0.897075	0.179039	4.81526	0.174566	0.0132155	0.00859752	0.0348672	0.0348672
NA	ENST00000640260.2	5.63698e-07	6.44115e-05	-0.913427	0.182567	4.83124	0.19628	0.00903372	0.0409621	0.0344432	0.0409621
HECTD1	ENST00000553957.5	5.90351e-07	6.69942e-05	-0.650352	0.130218	6.54992	0.106924	0.00915007	0.0162848	0.0134701	0.0162848
GGCT	ENST00000440082.5	5.92476e-07	6.71202e-05	-0.608397	0.121834	6.29772	0.0856798	0.00747049	-0.00548173	0.0147948	0.0147948
CBX3	ENST00000396386.7	6.31124e-07	7.10122e-05	-0.618516	0.124164	8.17362	0.0911723	0.0011964	0.0219287	0.00982555	0.0219287
CR383656.13	ENST00000551951.1	7.12712e-07	7.85883e-05	-0.968546	0.195355	4.54252	0.226813	0.0130006	0.00916581	0.044245	0.044245
PTP4A2	ENST00000457805.6	7.22812e-07	7.93055e-05	-0.92827	0.187335	5.42985	0.233728	0.0291247	0.0118972	0.0235169	0.0235169
LIN7A	ENST00000552864.5	7.51063e-07	8.18621e-05	-0.851728	0.172147	5.78652	0.238297	0.00400379	0.0404482	0.0188601	0.0404482
ADGRA3	ENST00000282943.9	7.64969e-07	8.29678e-05	-0.781833	0.158135	6.35059	0.143218	0.0178733	0.0196366	0.0144938	0.0196366
MIS18BP1	ENST00000310806.9	7.88475e-07	8.50987e-05	-0.659509	0.133553	7.60472	0.116881	0.000713007	0.0260414	0.010187	0.0260414
NA	ENST00000644851.1	8.06435e-07	8.67541e-05	-0.650135	0.131771	5.63812	0.0854827	0.00539264	-0.00166446	0.0206529	0.0206529
KIF20B	ENST00000260753.8	8.19194e-07	8.76988e-05	-0.664093	0.134684	7.5968	0.155649	0.00405016	0.0231596	0.0101983	0.0231596
ANKRD26	ENST00000376087.4	8.38805e-07	8.95086e-05	-0.635005	0.128906	5.87913	0.0898887	0.00700957	0.0103973	0.0179155	0.0179155
TENT5C	ENST00000369448.4	8.48334e-07	9.00865e-05	-1.49966	0.304567	3.79312	0.77579	0.0334054	0.0956209	0.105736	0.105736
ITGA4	ENST00000397033.7	9.2643e-07	9.65238e-05	-0.949207	0.193453	4.66017	0.27962	0.0165003	0.0042252	0.0396357	0.0396357
ZNF493	ENST00000392288.6	9.719e-07	0.000100134	-0.596458	0.121795	6.20829	0.0747819	0.00690994	0.00308952	0.0153409	0.0153409
ASXL2	ENST00000435504.8	1.06381e-06	0.000107782	-0.828384	0.16977	6.27644	0.166776	0.00661537	0.0366173	0.0149203	0.0366173
SRSF3	ENST00000614136.1	1.11815e-06	0.000112426	-1.25282	0.257272	5.08667	0.634271	0.0704009	0.0211458	0.0288823	0.0288823
CAND1	ENST00000540319.5	1.1608e-06	0.000115487	-0.70912	0.145843	6.04857	0.13319	0.0082321	0.0236732	0.0164608	0.0236732
TMF1	ENST00000488010.5	1.17464e-06	0.000116338	-0.700267	0.144092	5.76828	0.138288	0.012083	0.0173626	0.0190607	0.0190607
ASPM	ENST00000367409.9	1.25959e-06	0.000123276	-0.712171	0.14696	7.81559	0.119721	0.00062266	0.0317732	0.00995084	0.0317732
RBM3	ENST00000489344.5	1.50042e-06	0.000143037	-2.04646	0.425356	5.17965	0.91611	0.24412	-0.107259	0.0272722	0.0272722
ZNF283	ENST00000588797.6	1.50315e-06	0.000143091	-4.94488	1.02787	1.79223	5.77367	0.425715	1.15905	0.867776	1.15905
PFDN4	ENST00000441080.2	1.56956e-06	0.000148346	-0.621276	0.129374	6.20271	0.0945899	0.00277039	0.0223361	0.0153768	0.0223361
THOC3	ENST00000514861.5	1.62021e-06	0.000152047	-5.17232	1.07851	2.9952	5.78643	1.46362	-0.66767	0.281157	0.281157
UBAP2	ENST00000412543.5	1.70612e-06	0.000159206	-5.31101	1.10983	2.18493	5.49473	1.22291	-1.09631	0.624666	0.624666
MACF1	ENST00000289893.8	1.73564e-06	0.000161732	-1.43621	0.300336	5.67637	0.490421	0.0351291	0.100173	0.0201541	0.100173
LTN1	ENST00000361371.10	1.76947e-06	0.000164653	-0.591821	0.123861	7.18271	0.09905	0.000796223	0.0222161	0.0110492	0.0222161
POLR3G	ENST00000503373.5	2.03614e-06	0.000185297	-0.788945	0.166101	6.23611	0.153076	0.00480921	0.0365749	0.0151656	0.0365749
CSTF3	ENST00000323959.9	2.07855e-06	0.000187879	-1.11598	0.235159	6.54868	0.304367	0.00478436	0.0781654	0.0134761	0.0781654
C21orf91	ENST00000284881.9	2.15209e-06	0.000193454	-0.587663	0.124016	6.67055	0.0824829	0.00161332	0.0214568	0.0129096	0.0214568
ADAMTSL3	ENST00000569510.5	2.24554e-06	0.000198617	-0.621187	0.13133	5.60117	0.0807461	0.00471412	0.00643202	0.0211572	0.0211572
BCCIP	ENST00000299130.7	2.32253e-06	0.000203521	-0.594327	0.125834	6.198	0.0871096	0.0031338	0.0206174	0.0154072	0.0206174
SENP6	ENST00000503501.1	2.40267e-06	0.000209158	-0.944199	0.200202	5.57036	0.215796	0.0385425	0.0209345	0.021579	0.021579
ARID4B	ENST00000264183.9	2.40753e-06	0.000209307	-0.648371	0.137489	6.69135	0.106388	0.0104666	0.0178882	0.0128158	0.0178882
PRPF4B	ENST00000480058.5	2.46516e-06	0.000212918	-0.690941	0.146666	7.53475	0.12383	0.00186762	0.0303986	0.010293	0.0303986
ZNF292	ENST00000339907.8	2.46247e-06	0.000212918	-0.692041	0.146892	6.96793	0.12046	0.00236328	0.0300027	0.01171	0.0300027
HSD17B4	ENST00000518349.5	2.63839e-06	0.000224653	-5.9938	1.27605	2.33226	8.56973	1.04754	1.39493	0.5477	1.39493
ZSCAN30	ENST00000589178.5	2.66023e-06	0.000225971	-0.588991	0.125439	5.72518	0.0748532	0.00404659	0.00869157	0.0195558	0.0195558
NA	ENST00000620031.5	2.97825e-06	0.000245687	-1.95167	0.417709	6.83023	1.03992	0.20427	0.0574517	0.0122227	0.0574517
SHPRH	ENST00000367505.6	3.02602e-06	0.000248389	-0.589707	0.126301	6.70494	0.086791	0.0111732	0.0123899	0.0127549	0.0127549
AKAP9	ENST00000356239.7	3.32767e-06	0.000266536	-0.695857	0.149663	7.08189	0.116028	0.00286386	0.0307348	0.0113393	0.0307348
FBXO15	ENST00000580806.5	3.57822e-06	0.00028488	-0.94368	0.203621	4.44739	0.233438	0.0134229	0.0176041	0.0487694	0.0487694
INPP5F	ENST00000637174.1	3.61554e-06	0.00028716	-0.890571	0.192251	7.02739	0.19722	0.0161501	0.0392904	0.0115108	0.0392904
NASP	ENST00000470768.5	3.64869e-06	0.000289112	-1.76678	0.381557	6.66452	0.770502	0.0178211	0.200558	0.0129369	0.200558
DYNC1H1	ENST00000360184.10	3.71708e-06	0.000292416	-0.753211	0.1628	5.86365	0.121492	0.0216905	-0.00256803	0.0180652	0.0180652
TRA2B	ENST00000259043.11	4.0972e-06	0.000317042	-0.989329	0.214773	5.35483	0.254313	0.0275653	0.041626	0.0245832	0.041626
ANKRD17	ENST00000558247.5	4.1591e-06	0.000320707	-0.724652	0.157421	7.18344	0.157915	0.0154087	0.0217634	0.0110473	0.0217634
SNX25	ENST00000264694.13	4.20192e-06	0.000323503	-0.675988	0.146918	5.97147	0.136925	0.0112734	0.0211038	0.0170836	0.0211038
CDK2AP1	ENST00000618072.4	4.52536e-06	0.00034374	-0.8463	0.184553	6.91574	0.207335	0.0127995	0.0382903	0.0118958	0.0382903
HSP90AB2P	ENST00000602906.1	4.64498e-06	0.000351214	-1.33127	0.290658	3.84038	0.410238	0.0269306	-0.0027787	0.0997923	0.0997923
NACA	ENST00000549259.5	4.95535e-06	0.000370029	-0.732967	0.160504	7.32453	0.197623	0.0132622	0.0253799	0.0106982	0.0253799
EIF4G3	ENST00000264211.12	4.97994e-06	0.00037061	-0.653903	0.143223	7.18618	0.103271	0.00593695	0.0248322	0.0110399	0.0248322
NBEA	ENST00000379939.6	5.044e-06	0.000374018	-0.701967	0.153841	6.84835	0.120054	0.0123976	0.0231027	0.012151	0.0231027
ZNF224	ENST00000591551.1	5.11081e-06	0.000376958	-0.683099	0.149796	5.42981	0.160206	0.0101409	0.00589414	0.0235175	0.0235175
SNX5	ENST00000483485.5	5.14153e-06	0.00037838	-0.615577	0.135027	5.69832	0.0898699	0.00746851	0.0157336	0.0198798	0.0198798
COX7B	ENST00000647835.1	5.30278e-06	0.000388088	-0.621417	0.136502	6.25667	0.0994135	0.00560756	0.0223417	0.0150393	0.0223417
PABPC4	ENST00000421687.6	5.81983e-06	0.000420349	-0.908064	0.20033	6.26671	0.263393	0.0388081	0.0213903	0.0149785	0.0213903
TMEM212	ENST00000334567.9	5.91016e-06	0.00042548	-0.772228	0.170486	4.8776	0.136118	0.0103251	0.0220797	0.0332729	0.0332729
ONECUT2	ENST00000491143.3	6.32381e-06	0.000448909	-0.647577	0.143419	5.476	0.105718	0.00423752	0.0266162	0.022875	0.0266162
HDGF	ENST00000368209.9	6.34596e-06	0.000449999	-0.879944	0.194914	5.94532	0.180733	0.0396783	0.00645388	0.017309	0.017309
TFRC	ENST00000360110.9	6.44164e-06	0.000453865	-0.958346	0.21243	8.35174	0.251519	0.000391846	0.067298	0.00989057	0.067298
PPP2CA	ENST00000472253.1	6.49766e-06	0.000456354	-0.71189	0.157864	5.39841	0.108005	0.0134219	-4.39393e-05	0.0239597	0.0239597
RAPGEF2	ENST00000644902.1	6.9317e-06	0.000480714	-0.633195	0.140842	6.85659	0.124891	0.0152944	0.0144604	0.0121189	0.0144604
SCARB2	ENST00000639715.1	7.19347e-06	0.000495234	-5.88722	1.3118	2.54051	10.54	2.13121	0.36841	0.45004	0.45004
HSP90AA1	ENST00000216281.12	7.34602e-06	0.000504747	-0.618812	0.138023	10.5347	0.120252	2.78473e-05	0.0285475	0.020381	0.0285475
SYNGR3	ENST00000618464.1	7.36216e-06	0.000504747	-5.2864	1.17923	2.01679	6.81411	1.16798	0.91788	0.721608	0.91788
CCDC88A	ENST00000426576.6	7.35406e-06	0.000504747	-0.672787	0.150069	5.56831	0.114172	0.00961048	0.0241707	0.0216071	0.0241707
VCAN	ENST00000513016.5	7.44927e-06	0.000508611	-1.18219	0.263857	5.91824	0.447642	0.0687572	0.0356739	0.0175508	0.0356739
HNRNPM	ENST00000600092.5	7.56484e-06	0.000514907	-0.680925	0.152089	7.29933	0.116698	0.00219766	0.032499	0.0107559	0.032499
NOL7	ENST00000474485.1	7.96491e-06	0.000538262	-0.712849	0.159612	6.31298	0.225533	0.00552072	0.0326935	0.0147064	0.0326935
KRR1	ENST00000551070.5	8.03033e-06	0.000541577	-0.7713	0.172768	4.90499	0.169837	0.0121528	0.027643	0.0326203	0.0326203
CCNB1	ENST00000256442.10	8.19893e-06	0.00054792	-0.65201	0.146193	7.43305	0.112361	0.00219259	0.0298661	0.0104724	0.0298661
PAPSS2	ENST00000456849.2	8.55858e-06	0.000570227	-6.04538	1.35829	3.12263	7.51271	2.52633	-2.08044	0.241118	0.241118
TERF1	ENST00000276602.10	8.77047e-06	0.000581417	-0.648867	0.145962	8.71923	0.104302	0.0012826	0.0306747	0.0103011	0.0306747
ITK	ENST00000519402.5	9.36636e-06	0.000614151	-1.8368	0.414504	3.31756	0.790703	0.0691273	0.027637	0.188594	0.188594
TRIP11	ENST00000554357.5	9.80191e-06	0.000637654	-0.722088	0.163313	5.50069	0.145001	0.0174723	0.00680336	0.0225345	0.0225345
DUT	ENST00000558813.5	9.81397e-06	0.000637812	-0.599049	0.135494	6.75368	0.0938482	0.0051813	0.0223565	0.0125402	0.0223565
HNRNPU	ENST00000440865.2	1.01799e-05	0.000657716	-0.699415	0.158478	7.43735	0.183377	0.0100019	0.0276712	0.0104642	0.0276712
HNRNPU	ENST00000366525.8	1.04163e-05	0.000668421	-7.01667	1.59168	3.03672	15.201	1.54793	2.25224	0.267689	2.25224
SULT1B1	ENST00000310613.8	1.05592e-05	0.000675622	-0.588965	0.133692	5.55437	0.0719358	0.00501244	0.00415628	0.0217978	0.0217978
RPS3AP26	ENST00000398259.2	1.06451e-05	0.000678498	-2.46838	0.560533	3.53662	1.57502	0.117467	0.353828	0.143887	0.353828
TAF1D	ENST00000530769.5	1.07042e-05	0.000680949	-0.883041	0.20058	5.32605	0.214359	0.0115453	0.0488033	0.0250025	0.0488033
C12orf75	ENST00000548336.1	1.08131e-05	0.000686557	-0.751506	0.170788	5.30453	0.137095	0.0184318	0.0064223	0.0253208	0.0253208
RPS24	ENST00000360830.9	1.1402e-05	0.000715708	-0.588749	0.13415	7.05321	0.0941296	0.0150163	0.0119782	0.0114282	0.0119782
HSD17B12	ENST00000527213.5	1.20673e-05	0.000747543	-1.04818	0.239509	5.31758	0.247816	0.0609192	-0.00917194	0.0251273	0.0251273
PSMA2	ENST00000445517.1	1.22001e-05	0.000754352	-0.745616	0.170466	6.97106	0.142878	0.00400138	0.0395867	0.0116992	0.0395867
RPL36	ENST00000579649.5	1.30113e-05	0.000793389	-1.3474	0.309042	6.29604	0.613165	0.0520011	0.0912597	0.0148046	0.0912597
CEP78	ENST00000424347.6	1.3144e-05	0.00079854	-0.73796	0.169346	6.04543	0.163269	0.00417293	0.0388444	0.016485	0.0388444
CYTIP	ENST00000264192.8	1.37867e-05	0.000833753	-2.00074	0.460233	3.21232	1.29366	0.102199	0.171622	0.215522	0.215522
NA	ENST00000646637.1	1.41697e-05	0.000852244	-0.605255	0.139421	5.47586	0.0750734	0.00628027	0.00177558	0.0228769	0.0228769
ARID1B	ENST00000647938.1	1.43429e-05	0.000860317	-1.06045	0.244426	5.62804	0.271786	0.0688272	0.00720071	0.0207891	0.0207891
QSER1	ENST00000524678.1	1.4656e-05	0.000876707	-0.929889	0.214567	5.69474	0.235353	0.0286703	0.0403881	0.019924	0.0403881
PHF6	ENST00000332070.7	1.49003e-05	0.000882546	-0.952556	0.219982	5.30536	0.206362	0.0472795	-0.0076192	0.0253085	0.0253085
SLC25A24	ENST00000639032.1	1.50169e-05	0.000887278	-0.675532	0.156068	5.6446	0.150088	0.0159693	0.00709981	0.0205665	0.0205665
SLC25A24	ENST00000370041.4	1.50169e-05	0.000887278	-0.675532	0.156068	5.6446	0.150088	0.0159693	0.00709981	0.0205665	0.0205665
STXBP4	ENST00000376352.6	1.53477e-05	0.000900878	-0.644674	0.149105	5.83226	0.102985	0.00382057	0.0295277	0.0183786	0.0295277
COMMD6	ENST00000460675.5	1.55153e-05	0.0009084	-0.976922	0.226074	4.67333	0.22394	0.0374852	0.0223712	0.0391791	0.0391791
ZBTB20	ENST00000357258.8	1.57849e-05	0.000919305	-0.898742	0.208165	4.50794	0.200436	0.0120151	0.0529841	0.0458023	0.0529841
SP100	ENST00000340126.9	1.59653e-05	0.000928175	-1.52096	0.352488	3.55664	0.512195	0.0458313	-0.011213	0.14054	0.14054
EIF4A2	ENST00000440191.6	1.61302e-05	0.000935299	-0.727439	0.168675	7.41738	0.138932	0.0124954	0.0301817	0.0105028	0.0301817
TFDP2	ENST00000499676.5	1.66064e-05	0.000961054	-4.96395	1.15274	3.7537	8.41697	1.88226	-0.883944	0.110944	0.110944
NSD1	ENST00000644863.1	1.67083e-05	0.000963749	-0.626387	0.145506	5.38902	0.0947437	0.00766518	0.0168036	0.024093	0.024093
FUS	ENST00000568901.2	1.68819e-05	0.000972071	-1.39663	0.324603	5.09797	0.575351	0.059355	0.098696	0.0286778	0.098696
SLC38A2	ENST00000548870.5	1.6968e-05	0.000976174	-1.46357	0.340249	4.10814	0.480293	0.101714	-0.00448479	0.07194	0.07194
CCNG2	ENST00000316355.10	1.76267e-05	0.00100723	-0.921563	0.214666	5.06149	0.211234	0.00856712	0.0605551	0.0293484	0.0605551
IPO5	ENST00000651721.1	1.79556e-05	0.00102057	-0.817721	0.19066	7.31521	0.174376	0.0438073	0.00112866	0.0107194	0.0107194
TAF4	ENST00000627770.2	1.82048e-05	0.00102942	-0.852258	0.198854	5.61514	0.175262	0.0383488	0.0127159	0.0209658	0.0209658
TRBC2	ENST00000622053.4	1.82642e-05	0.00103191	-0.886264	0.206824	5.97653	0.195398	0.00269596	0.0614681	0.0170408	0.0614681
MIER1	ENST00000371014.5	1.8481e-05	0.00103883	-5.625	1.31349	2.11242	7.44533	1.92273	0.0940617	0.66514	0.66514
AKIRIN1	ENST00000372984.8	1.92708e-05	0.00107049	-3.76152	0.880264	4.0314	3.73686	1.08334	-0.468976	0.078962	0.078962
ESF1	ENST00000617257.1	1.94404e-05	0.0010781	-0.962434	0.22533	5.16456	0.262011	0.0486374	-0.0118846	0.0275228	0.0275228
SETX	ENST00000224140.6	1.97703e-05	0.00109	-0.79728	0.186827	7.63227	0.161411	0.000752184	0.0516045	0.0101491	0.0516045
GMNN	ENST00000356509.7	2.00747e-05	0.00110494	-0.816967	0.191594	6.12323	0.216647	0.0109839	0.0440783	0.0159115	0.0440783
VTA1	ENST00000367630.9	2.04469e-05	0.00111984	-1.03181	0.242212	4.27786	0.296909	0.0291427	0.0494134	0.0588571	0.0588571
FANCL	ENST00000233741.8	2.2163e-05	0.00120584	-0.603537	0.14228	6.10895	0.11123	0.0143525	0.00861827	0.0160128	0.0160128
TMEM200A	ENST00000617887.4	2.25483e-05	0.00122015	-0.687836	0.162301	5.76689	0.121817	0.020436	0.000126049	0.0190763	0.0190763
PTP4A2	ENST00000602725.5	2.25367e-05	0.00122015	-1.34152	0.316533	7.12279	0.471702	0.0742092	0.0760806	0.0112174	0.0760806
TYMS	ENST00000581920.1	2.27315e-05	0.00122569	-1.07986	0.254911	5.22592	0.335682	0.0709442	0.026351	0.0265255	0.0265255
METTL9	ENST00000615720.4	2.30125e-05	0.0012358	-5.33795	1.2609	2.04042	8.8061	0.804676	1.58012	0.707325	1.58012
NA	ENST00000640441.1	2.30125e-05	0.0012358	-5.33795	1.2609	2.04042	8.8061	0.804676	1.58012	0.707325	1.58012
SYT14	ENST00000637265.1	2.33088e-05	0.00124665	-1.34698	0.318392	5.33309	0.526263	0.0440687	0.107992	0.0248993	0.107992
NA	ENST00000558084.5	2.32953e-05	0.00124665	-0.704904	0.166616	5.96595	0.146003	0.00592356	0.0357178	0.0171305	0.0357178
PHTF1	ENST00000369600.5	2.36958e-05	0.00126428	-4.90324	1.16001	2.64352	5.56536	1.61154	-1.27756	0.406907	0.406907
CFAP54	ENST00000550977.2	2.44518e-05	0.00129687	-0.71946	0.170496	4.98107	0.125023	0.0126624	0.0243331	0.0309411	0.0309411
POTEI	ENST00000451531.6	2.51399e-05	0.00132319	-0.980951	0.232809	4.7673	0.24183	0.00867351	0.0726266	0.036209	0.0726266
HSPA4	ENST00000514825.1	2.52684e-05	0.0013289	-0.597835	0.141923	6.72885	0.186497	0.00404684	0.0261664	0.0126484	0.0261664
NA	ENST00000355193.6	2.60945e-05	0.0013626	-0.70543	0.167755	6.30791	0.140127	0.00566291	0.0365498	0.0147356	0.0365498
HLA-E	ENST00000415649.4	2.69487e-05	0.00139728	-0.889714	0.211946	5.30759	0.23367	0.00716549	0.0602164	0.0252752	0.0602164
HLA-E	ENST00000415289.4	2.69487e-05	0.00139728	-0.889714	0.211946	5.30759	0.23367	0.00716549	0.0602164	0.0252752	0.0602164
HLA-E	ENST00000383597.6	2.69487e-05	0.00139728	-0.889714	0.211946	5.30759	0.23367	0.00716549	0.0602164	0.0252752	0.0602164
HLA-E	ENST00000427936.4	2.69487e-05	0.00139728	-0.889714	0.211946	5.30759	0.23367	0.00716549	0.0602164	0.0252752	0.0602164
PANK1	ENST00000342512.3	2.72458e-05	0.00141145	-0.670363	0.159787	5.89638	0.114003	0.00412249	0.0341756	0.0177523	0.0341756
ZBTB14	ENST00000614697.4	2.7286e-05	0.00141145	-6.2818	1.49745	2.58925	9.93152	1.98144	1.38208	0.429195	1.38208
TAGLN2	ENST00000368096.5	2.81868e-05	0.00145079	-5.01211	1.19688	1.93481	6.30804	1.376	0.709832	0.772793	0.772793
EIF4G1	ENST00000435046.6	2.85756e-05	0.00146669	-0.988267	0.236172	7.64405	0.230928	0.0735319	-0.0115423	0.0101336	0.0101336
ANKRD20A11P	ENST00000451663.5	2.91056e-05	0.00148539	-0.815193	0.195006	4.55254	0.158848	0.0132291	0.0240007	0.0438118	0.0438118
NFYA	ENST00000341376.10	2.94993e-05	0.00150013	-0.978518	0.234247	6.56937	0.25809	0.00216981	0.0801375	0.0133775	0.0801375
B4GALT6	ENST00000578114.1	2.95858e-05	0.00150338	-0.607764	0.145515	5.3467	0.186575	0.0070611	0.0155272	0.024701	0.024701
TNFAIP8	ENST00000415806.2	2.96347e-05	0.0015047	-0.740267	0.177256	4.94857	0.243914	0.0154938	0.029965	0.0316358	0.0316358
SYT4	ENST00000255224.8	3.02738e-05	0.00153167	-0.615149	0.147468	5.81207	0.298065	0.00613792	0.0264825	0.0185874	0.0264825
PHIP	ENST00000479165.1	3.02815e-05	0.00153167	-0.947266	0.227089	5.01934	0.231233	0.0331034	0.0442509	0.0301622	0.0442509
PLS3	ENST00000539310.5	3.08976e-05	0.00155333	-0.90822	0.217969	7.82198	0.213666	0.0106091	0.0606564	0.00994559	0.0606564
PSME4	ENST00000404125.6	3.12617e-05	0.00156925	-0.601794	0.144521	8.31875	0.107434	0.0024174	0.0289119	0.00987209	0.0289119
CD46	ENST00000367041.5	3.17108e-05	0.00158458	-5.92285	1.42348	2.17611	8.74605	2.40997	0.455687	0.629481	0.629481
TASOR	ENST00000459993.5	3.25723e-05	0.00161664	-0.598982	0.14417	5.47355	0.0887019	0.00826855	0.0185525	0.0229089	0.0229089
ZNF143	ENST00000396602.7	3.27821e-05	0.00162218	-0.849963	0.204651	5.39591	0.18284	0.0374944	0.0253288	0.0239951	0.0253288
BAZ2B	ENST00000392782.5	3.50225e-05	0.00170751	-0.760415	0.18376	6.27711	0.140093	0.0357355	0.00460061	0.0149163	0.0149163
RBBP6	ENST00000348022.6	3.52797e-05	0.0017172	-2.18092	0.527251	5.1388	1.29413	0.38903	-0.0848526	0.0279598	0.0279598
RBPJ	ENST00000348160.8	3.52991e-05	0.0017172	-0.59118	0.142926	6.17695	0.0914884	0.0150968	0.0129906	0.0155449	0.0155449
TPM1	ENST00000559556.5	3.59546e-05	0.00174523	-0.866867	0.209791	5.98381	0.19161	0.0422261	0.0237925	0.0169798	0.0237925
KTN1	ENST00000554507.5	3.70718e-05	0.00178896	-1.28595	0.311745	5.39546	0.408581	0.121776	0.00535133	0.0240015	0.0240015
MGA	ENST00000545763.5	3.75679e-05	0.00180501	-5.58533	1.35502	4.16182	7.37153	2.68667	-0.664588	0.0674502	0.0674502
COX20	ENST00000366528.3	3.76442e-05	0.00180736	-0.632472	0.153458	5.26458	0.11115	0.00939979	0.0234058	0.025924	0.025924
ZNF826P	ENST00000622273.1	3.86042e-05	0.00184809	-1.42476	0.346179	4.94578	0.552275	0.143163	0.0365971	0.0316971	0.0365971
HOMER1	ENST00000535690.1	3.86746e-05	0.00185012	-0.651814	0.15839	5.19108	0.112358	0.010546	0.0235102	0.0270848	0.0270848
ITGB3BP	ENST00000271002.14	3.88237e-05	0.00185457	-0.799624	0.194349	5.44795	0.163664	0.00756113	0.0490962	0.0232642	0.0490962
CXCR4	ENST00000241393.3	3.91456e-05	0.00186456	-2.33446	0.567655	3.97469	1.5904	0.398716	-0.0721567	0.0846326	0.0846326
EMC2	ENST00000517784.5	3.91283e-05	0.00186456	-0.602058	0.146395	5.29096	0.120843	0.00662327	0.00913223	0.0255239	0.0255239
TRIM28	ENST00000601150.5	3.94745e-05	0.00187617	-0.684286	0.166471	5.83075	0.132585	0.0224756	0.0190935	0.018394	0.0190935
VAPB	ENST00000463370.5	3.97994e-05	0.00188619	-0.620843	0.151107	5.94263	0.11396	0.0169171	-0.00691056	0.0173327	0.0173327
NAP1L4	ENST00000448187.5	4.09457e-05	0.00193627	-2.53838	0.618804	3.70194	1.59039	0.45624	0.050458	0.118138	0.118138
SREK1	ENST00000284041.7	4.0979e-05	0.00193627	-0.592306	0.144398	5.88393	0.11006	0.0134067	0.0155381	0.0178697	0.0178697
NAP1L4	ENST00000632355.1	4.09457e-05	0.00193627	-2.53838	0.618804	3.70194	1.59039	0.45624	0.050458	0.118138	0.118138
CLEC2D	ENST00000290855.11	4.17327e-05	0.00195026	-0.89334	0.218012	4.42271	0.214627	0.0212234	0.0440015	0.0500703	0.0500703
NSD2	ENST00000382891.9	4.19079e-05	0.00195669	-5.86164	1.43082	3.17465	8.71371	2.84487	0.181325	0.22599	0.22599
BZW1	ENST00000410110.6	4.28423e-05	0.0019863	-0.861449	0.210541	5.51003	0.224535	0.0166099	0.0498816	0.0224059	0.0498816
MRPL42	ENST00000547098.5	4.31551e-05	0.00199653	-0.802732	0.196272	5.0326	0.142527	0.0278824	0.000823082	0.0299014	0.0299014
MSL1	ENST00000339569.9	4.4048e-05	0.00202236	-1.57678	0.385978	5.17988	0.643843	0.0851544	0.138314	0.0272684	0.138314
B2M	ENST00000623550.1	4.42384e-05	0.00202876	-2.93201	0.7179	3.25677	2.0775	0.569343	-0.279102	0.203727	0.203727
DNMT1	ENST00000586799.1	4.42795e-05	0.00202876	-5.10594	1.25025	1.70783	5.86626	1.41726	-0.18256	0.927428	0.927428
SFPQ	ENST00000470472.5	4.49341e-05	0.00205165	-0.729697	0.178824	7.15523	0.13625	0.00209466	0.0458726	0.0111249	0.0458726
CTCF	ENST00000644753.1	4.65374e-05	0.00210885	-5.89169	1.44675	3.138	10.0638	2.24412	0.895503	0.23657	0.895503
DNAJB9	ENST00000249356.4	4.70712e-05	0.00213012	-0.609005	0.149643	5.17538	0.0794342	0.0062468	0.00656799	0.0273428	0.0273428
HMGB1	ENST00000399494.5	4.76161e-05	0.00214743	-0.730932	0.179721	8.41596	0.13694	0.00046636	0.0479832	0.00993505	0.0479832
DAZAP2	ENST00000412716.8	4.95986e-05	0.00222019	-0.721037	0.177704	6.23172	0.133323	0.0130385	0.0343297	0.015193	0.0343297
BTG2	ENST00000290551.5	4.96331e-05	0.00222023	-0.812726	0.20031	5.09093	0.265527	0.00704323	0.0531427	0.0288049	0.0531427
TCAF1	ENST00000479870.6	5.02577e-05	0.00224211	-0.637528	0.157243	7.33491	0.104047	0.000758744	0.0363291	0.0106751	0.0363291
S100A4	ENST00000368716.9	5.1608e-05	0.00229	-1.00423	0.248067	5.33551	0.49782	0.00653984	0.0857663	0.0248639	0.0857663
NBPF20	ENST00000620821.1	5.19461e-05	0.00229922	-3.25531	0.804437	2.83501	2.89496	0.634864	0.0540626	0.335815	0.335815
GOLM1	ENST00000388711.7	5.33245e-05	0.0023504	-0.793828	0.196465	6.82558	0.138708	0.0456564	-0.0182715	0.0122413	0.0122413
SRSF11	ENST00000370950.7	5.52237e-05	0.0024196	-0.673977	0.167143	5.94414	0.117795	0.0102448	0.0316602	0.0173194	0.0316602
METTL5	ENST00000392640.6	5.53265e-05	0.0024225	-0.719156	0.178366	5.83439	0.132848	0.0145538	0.033168	0.018357	0.033168
NR4A2	ENST00000339562.9	5.56885e-05	0.00243674	-4.51008	1.11902	2.0706	5.48933	0.181642	1.69668	0.689404	1.69668
PSME3IP1	ENST00000562324.5	5.74016e-05	0.00249029	-1.25246	0.311307	4.55339	0.486571	0.101592	-0.0125488	0.0437754	0.0437754
NCALD	ENST00000522754.1	5.80694e-05	0.00251267	-0.665437	0.16551	4.95998	0.12705	0.00970211	0.017262	0.0313883	0.0313883
FBXO7	ENST00000397426.5	5.88566e-05	0.00254009	-0.882547	0.219684	6.30922	0.246356	0.0395525	0.0328391	0.014728	0.0328391
OR7E122P	ENST00000641144.1	6.0121e-05	0.00258118	-0.907385	0.226149	4.28736	0.183356	0.0184975	-0.00459771	0.0582174	0.0582174
SHPRH	ENST00000433355.6	6.11129e-05	0.00261528	-1.04994	0.26193	4.6666	0.285462	0.0164998	0.0864111	0.0394111	0.0864111
LRBA	ENST00000651695.1	6.23953e-05	0.00265477	-0.750926	0.187564	6.83503	0.157699	0.0201651	0.0326055	0.0122036	0.0326055
CENPF	ENST00000366955.8	6.35599e-05	0.00269559	-0.694977	0.173779	8.89503	0.124955	0.000140636	0.0451583	0.0106378	0.0451583
PAWR	ENST00000548075.5	6.39491e-05	0.00270689	-0.713194	0.178399	5.00414	0.131641	0.0165515	0.0311879	0.0304667	0.0311879
FER	ENST00000502752.1	6.50423e-05	0.00273393	-0.834947	0.209065	4.40572	0.159126	0.0145641	0.0146023	0.0509979	0.0509979
TOB1	ENST00000499247.3	6.56631e-05	0.00275652	-0.665631	0.166763	5.79689	0.117336	0.00598873	0.0357262	0.0187482	0.0357262
DPYSL5	ENST00000614712.4	6.59933e-05	0.00276512	-6.10675	1.5304	2.52809	9.68426	1.55177	1.96143	0.455476	1.96143
PEG10	ENST00000615790.4	6.67764e-05	0.00278909	-1.25116	0.313772	7.22627	0.411169	0.12972	0.0179591	0.0109345	0.0179591
XPO1	ENST00000406957.5	6.93439e-05	0.00288359	-0.726424	0.182586	7.99995	0.178343	0.00369354	0.0463131	0.00984362	0.0463131
CENPE	ENST00000380026.7	6.9732e-05	0.00289791	-0.620573	0.156033	7.29945	0.121603	0.0049689	0.0315504	0.0107556	0.0315504
ZMYND11	ENST00000627286.1	7.01511e-05	0.00291349	-5.58465	1.40467	1.98698	7.19145	2.21973	-0.465992	0.739922	0.739922
PPP5C	ENST00000493347.5	7.27262e-05	0.00300348	-4.25519	1.0726	1.64872	5.87313	0.438805	1.28689	0.970666	1.28689
FNIP1	ENST00000307954.12	7.2857e-05	0.00300512	-5.1321	1.29378	2.03696	6.87449	1.80138	0.69925	0.709403	0.709403
HSPE1-MOB4	ENST00000604458.1	7.35416e-05	0.00302959	-0.880602	0.22212	5.23089	0.235361	0.047559	0.0108822	0.0264471	0.0264471
TCERG1	ENST00000296702.9	7.44275e-05	0.00305277	-0.679489	0.171516	7.04894	0.134013	0.00641127	0.0377152	0.0114417	0.0377152
PLEKHG1	ENST00000358517.6	7.50434e-05	0.00307422	-5.0739	1.28138	2.62652	6.27233	2.04913	-1.96008	0.413785	0.413785
FOCAD	ENST00000338382.10	7.65839e-05	0.00311803	-1.12386	0.284174	6.45814	0.298513	0.10721	-0.0262553	0.0139227	0.0139227
ALCAM	ENST00000486979.6	7.67779e-05	0.00312133	-0.724534	0.18323	6.19515	0.278393	0.00637293	0.0439867	0.0154256	0.0439867
NSD1	ENST00000439151.6	7.69087e-05	0.00312356	-1.26006	0.318693	7.11726	0.41984	0.0394369	0.112911	0.0112336	0.112911
ZC3HAV1	ENST00000242351.10	7.87284e-05	0.00317609	-0.765723	0.19394	7.62472	0.154031	0.000680301	0.0557391	0.0101593	0.0557391
ZWILCH	ENST00000307897.10	7.90496e-05	0.00318703	-0.640024	0.162144	6.64009	0.122195	0.00928558	0.0301503	0.0130483	0.0301503
TASOR	ENST00000493960.6	8.09776e-05	0.00325485	-0.653547	0.165812	5.99646	0.129854	0.00912333	0.0321173	0.0168751	0.0321173
SGSM2	ENST00000574563.5	8.2209e-05	0.00330033	-4.90359	1.24524	1.83487	6.04597	1.48734	0.545216	0.838593	0.838593
LCP2	ENST00000521416.5	8.31056e-05	0.00333027	-3.47625	0.883359	1.87283	2.84029	0.35732	0.407472	0.813164	0.813164
CLIP1	ENST00000537123.2	8.74861e-05	0.00348051	-0.685269	0.174684	4.91907	0.156078	0.00757198	0.0381997	0.0322953	0.0381997
SF3A3	ENST00000461869.5	9.00196e-05	0.00354717	-1.49032	0.380568	3.90797	0.52181	0.125397	0.000658524	0.0918508	0.0918508
HSPA9	ENST00000524109.1	9.31627e-05	0.00365145	-0.600995	0.153796	5.7982	0.106496	0.0167456	0.0173494	0.0187343	0.0187343
TRAM1	ENST00000520700.1	9.46383e-05	0.00369833	-1.13814	0.291536	5.00654	0.341269	0.0295976	0.097892	0.0304183	0.097892
CYSLTR1	ENST00000493254.1	9.66703e-05	0.00374675	-0.877295	0.225017	4.3821	0.18348	0.0236173	0.0198789	0.0523314	0.0523314
NPIPB5	ENST00000538590.1	0.000102349	0.00391637	-2.47558	0.637223	3.04155	1.39164	0.34293	-0.0264063	0.266149	0.266149
CAMK4	ENST00000282356.9	0.000105927	0.00403464	-0.601425	0.155143	5.10705	0.123588	0.00700567	0.0290982	0.0285152	0.0290982
LPAR4	ENST00000435339.3	0.00010689	0.00405961	-0.6733	0.173782	4.97993	0.109101	0.0143352	0.011314	0.030965	0.030965
GLIPR1	ENST00000266659.8	0.00010913	0.00413048	-1.71059	0.442088	3.21642	0.65858	0.0787531	0.0575951	0.214409	0.214409
ACTG1	ENST00000615544.4	0.000109633	0.00414475	-0.911151	0.235548	7.26304	0.242919	0.00679769	0.0764265	0.0108425	0.0764265
SERBP1	ENST00000484880.1	0.000112461	0.00421938	-5.30235	1.37295	3.42548	9.1465	1.47792	1.34958	0.164647	1.34958
SYNCRIP	ENST00000444272.1	0.000112875	0.00422387	-1.08539	0.281109	5.64962	0.338306	0.0217458	0.0967878	0.0205	0.0967878
DST	ENST00000361203.7	0.00011387	0.0042534	-1.33758	0.346616	7.4185	0.481215	0.00178267	0.178432	0.0105006	0.178432
TARS1	ENST00000507716.5	0.000114069	0.00425413	-0.588124	0.152422	7.48904	0.109505	0.0244786	-0.00298198	0.0103699	0.0103699
RBM5	ENST00000469838.5	0.000114906	0.00427123	-0.846667	0.219529	4.39698	0.172013	0.020804	0.0154485	0.0514854	0.0514854
DCUN1D5	ENST00000527260.5	0.000115913	0.00429626	-0.912704	0.236782	4.81278	0.52624	0.0491647	-0.0388924	0.0349342	0.0349342
CSNK2A1	ENST00000643660.1	0.000120979	0.00446575	-0.746784	0.194266	4.9712	0.129599	0.0254601	0.000746174	0.0311488	0.0311488
SPEN	ENST00000471538.1	0.000123384	0.00453619	-0.992361	0.258474	4.04982	0.331013	0.0230033	0.0493371	0.0772101	0.0772101
SPTLC3	ENST00000476791.1	0.000124883	0.00456783	-1.01357	0.264201	3.9746	0.226383	0.0200618	0.0165302	0.0846419	0.0846419
NPTN	ENST00000345330.8	0.000125895	0.00459416	-0.686681	0.179087	6.60884	0.125007	0.00823147	0.0398765	0.0131924	0.0398765
SUB1	ENST00000511615.5	0.000128037	0.00465946	-0.655601	0.171166	5.52804	0.135826	0.0217881	0.0119947	0.0221586	0.0221586
ZNF69	ENST00000429654.6	0.000128833	0.00467903	-0.739299	0.193095	4.9518	0.147908	0.00748437	0.0484441	0.0315653	0.0484441
BAZ1A	ENST00000360310.6	0.000129594	0.00469507	-0.882053	0.230468	6.62982	0.208088	0.0195539	0.0601192	0.0130954	0.0601192
HNRNPDL	ENST00000295470.9	0.000131091	0.00472643	-0.75474	0.197349	6.39713	0.129719	0.0441793	-0.018525	0.0142405	0.0142405
PRKACB	ENST00000370685.7	0.000134072	0.00480741	-4.76666	1.24819	1.90821	7.09214	0.564988	1.77198	0.789943	1.77198
CCDC144B	ENST00000618081.4	0.000135229	0.00483346	-1.27344	0.333648	3.98265	0.424695	0.08317	0.0644412	0.0838111	0.0838111
CACYBP	ENST00000405362.1	0.000135454	0.00483794	-0.792288	0.207605	6.34976	0.254115	0.00678861	0.0578612	0.0144985	0.0578612
PHTF1	ENST00000393357.6	0.00013582	0.00484675	-4.90234	1.28479	1.76392	6.0012	1.58853	0.404742	0.887509	0.887509
MATR3	ENST00000510056.5	0.000137431	0.00489365	-0.617025	0.161832	8.69856	0.101137	0.00198595	0.0372985	0.0102677	0.0372985
RBPMS	ENST00000523115.5	0.000141334	0.00500838	-5.08743	1.33675	2.47114	7.01523	1.02852	1.65182	0.481044	1.65182
RBM25	ENST00000261973.12	0.000143353	0.00506365	-0.626388	0.164739	5.67409	0.0901904	0.0205254	-0.0028829	0.020183	0.020183
TDP1	ENST00000555178.5	0.000144323	0.0050925	-3.69096	0.971143	2.76351	4.06852	1.05359	0.199268	0.361084	0.361084
ZNF326	ENST00000394583.7	0.000146918	0.00517359	-0.593061	0.156224	6.12825	0.106335	0.00294738	0.0336615	0.0158763	0.0336615
EIF4B	ENST00000416762.7	0.000147741	0.00519372	-0.835548	0.22018	6.9206	0.185575	0.0497029	0.0230162	0.011878	0.0230162
TPTEP1	ENST00000588424.1	0.000150594	0.00525813	-0.772422	0.203801	4.4264	0.152378	0.0124296	0.0112755	0.0498724	0.0498724
CAPN2	ENST00000433674.6	0.000155597	0.00539251	-5.04657	1.33438	2.31117	6.22241	2.11251	-0.923306	0.55834	0.55834
IL10RA	ENST00000227752.7	0.000156896	0.00542616	-3.42518	0.906158	1.67915	4.51868	0.170915	1.06077	0.948262	1.06077
GOLGB1	ENST00000482512.5	0.000161359	0.00554285	-1.13407	0.300584	6.90081	0.346206	0.11314	0.0223858	0.0119508	0.0223858
SKA2	ENST00000581068.5	0.000165234	0.00564663	-0.762602	0.202444	4.72808	0.141524	0.0240854	-0.00824041	0.0373899	0.0373899
PARD3	ENST00000466092.1	0.000175251	0.0059156	-1.37941	0.367622	4.20074	0.479863	0.138315	0.00406557	0.0644034	0.0644034
GPI	ENST00000589985.5	0.00017562	0.0059225	-1.76688	0.47095	3.09763	0.718394	0.0840328	0.0933629	0.248658	0.248658
TMSB4X	ENST00000380635.5	0.000176287	0.00593845	-1.83419	0.489016	3.8169	0.680129	0.256	-0.210102	0.102705	0.102705
PANK1	ENST00000307534.8	0.000176832	0.00594472	-0.632447	0.168652	4.99774	0.133069	0.0120686	0.0186922	0.0305969	0.0305969
IRF1	ENST00000245414.9	0.000181774	0.00607159	-1.1778	0.314661	3.93965	0.315187	0.0601696	-0.0188626	0.0883479	0.0883479
CTSV	ENST00000479932.1	0.000181799	0.00607159	-0.677506	0.181004	5.07557	0.131492	0.0179353	0.0312082	0.0290861	0.0312082
EIF4G2	ENST00000396525.6	0.00018387	0.00611894	-0.667186	0.178382	6.94324	0.124089	0.0102812	0.0374491	0.0117967	0.0374491
FYN	ENST00000368682.7	0.00018384	0.00611894	-4.64729	1.24251	3.3474	5.92014	2.13414	0.120566	0.181598	0.181598
TCOF1	ENST00000427724.7	0.000186276	0.00617824	-5.356	1.43326	2.20028	7.79419	1.9047	1.17664	0.616359	1.17664
EIF3M	ENST00000530026.5	0.000189787	0.00626561	-0.731281	0.195936	6.0874	0.148732	0.0153235	0.0422632	0.016169	0.0422632
GOLGA4	ENST00000356847.8	0.000189905	0.0062664	-0.773866	0.207355	6.39972	0.160887	0.0461355	0.0183587	0.0142267	0.0183587
ASB3	ENST00000406053.5	0.000190859	0.00628785	-0.617582	0.165535	5.22503	0.0934849	0.0145632	0.00795129	0.0265396	0.0265396
NBEAL1	ENST00000449802.5	0.000194179	0.00637158	-0.668908	0.179502	5.5814	0.121906	0.00522823	0.0431031	0.0214278	0.0431031
AC114936.1	ENST00000628304.1	0.000197688	0.00643971	-0.779935	0.20955	4.95471	0.172953	0.0178752	0.0479916	0.0315022	0.0479916
AC106795.4	ENST00000626482.1	0.000197688	0.00643971	-0.779935	0.20955	4.95471	0.172953	0.0178752	0.0479916	0.0315022	0.0479916
FDFT1	ENST00000530664.5	0.000199697	0.00648918	-1.49906	0.403038	3.8098	0.488323	0.140058	-0.066531	0.103601	0.103601
ECHDC1	ENST00000454591.6	0.000199976	0.00649185	-4.12575	1.10936	3.14687	5.00618	1.51226	0.33375	0.233974	0.33375
MYCBP2	ENST00000357337.10	0.000202392	0.00655743	-1.10618	0.297679	6.95844	0.403962	0.0955398	0.0373793	0.0117431	0.0373793
CENPI	ENST00000372927.5	0.000202336	0.00655743	-0.626652	0.168632	6.01747	0.120805	0.00486317	0.0377922	0.0167048	0.0377922
SBSPON	ENST00000297354.7	0.000204269	0.00659885	-0.92731	0.249701	4.08887	0.187492	0.0198909	0.00837463	0.0736351	0.0736351
RPL22P1	ENST00000418623.1	0.000206891	0.00666095	-0.597154	0.160938	6.7568	0.0964816	0.00944519	0.0294065	0.0125268	0.0294065
SBNO1	ENST00000267176.8	0.000207925	0.00668432	-0.705188	0.190119	7.33579	0.133905	0.035192	0.0190259	0.0106731	0.0190259
SCP2	ENST00000408941.7	0.000207872	0.00668432	-0.898075	0.242118	4.73109	0.217777	0.0490154	0.038916	0.0372965	0.038916
CLIP1	ENST00000648993.1	0.000213985	0.00682937	-3.56105	0.961952	3.48719	3.91473	0.670241	0.717786	0.152636	0.717786
CDK11B	ENST00000615951.4	0.000215486	0.00686121	-5.24352	1.41712	2.11473	7.13409	2.34851	0.206843	0.66382	0.66382
UBA2	ENST00000592841.5	0.000216599	0.0068829	-1.04718	0.28311	4.22699	0.38548	0.0411305	0.0790968	0.0624437	0.0790968
EMB	ENST00000506190.1	0.000216769	0.00688501	-0.783922	0.211949	4.83672	0.183273	0.0330833	0.0197355	0.0343005	0.0343005
TMTC1	ENST00000539277.6	0.000217194	0.00689187	-0.824277	0.22289	5.92997	0.335516	0.0570751	-0.0112781	0.017445	0.017445
MTREX	ENST00000506750.5	0.000217936	0.00691211	-0.895149	0.242111	6.88881	0.28489	0.0759311	-0.0302943	0.0119957	0.0119957
TRMT1	ENST00000592814.5	0.000220516	0.00698932	-4.83162	1.30787	1.82456	6.01534	1.7202	0.433023	0.845584	0.845584
MAP3K7	ENST00000369332.7	0.00022173	0.00701562	-0.697537	0.188887	6.94589	0.13599	0.00562708	0.0478904	0.0117872	0.0478904
PPP2R1A	ENST00000473820.1	0.000224107	0.00707393	-4.87992	1.32241	2.43896	6.77352	1.45036	1.1728	0.495951	1.1728
NA	ENST00000648940.1	0.000226733	0.00713408	-0.59325	0.160894	8.13985	0.134048	0.000415074	0.0384154	0.00982278	0.0384154
HSPE1	ENST00000233893.10	0.000227875	0.00713958	-0.683722	0.185495	8.23774	0.12738	0.000278039	0.0513348	0.00983916	0.0513348
TMEM182	ENST00000469971.5	0.000230065	0.00718994	-0.653472	0.177406	4.80328	0.103103	0.0120167	0.0166921	0.0351926	0.0351926
RPL9	ENST00000645496.1	0.000231043	0.00720189	-0.602467	0.163607	4.99574	0.0873786	0.00951309	0.00108392	0.0306377	0.0306377
NA	ENST00000397954.6	0.000236357	0.00731945	-0.696671	0.189487	6.27663	0.140667	0.0335037	0.0203545	0.0149192	0.0203545
ATP1B3	ENST00000484727.1	0.000238305	0.00735366	-5.52502	1.50361	2.37647	8.47519	1.34156	2.04969	0.525834	2.04969
N4BP2	ENST00000513269.1	0.000240015	0.00739265	-0.957801	0.26079	6.10386	0.248617	0.0139272	0.0880901	0.0160493	0.0880901
GALNT3	ENST00000409882.5	0.000241844	0.00743252	-4.74535	1.29275	2.02611	7.65244	1.35492	1.15188	0.715951	1.15188
HCST	ENST00000246551.8	0.000246764	0.00751659	-2.76488	0.754278	2.57579	1.71471	0.418532	-0.259607	0.434872	0.434872
FUBP1	ENST00000294623.8	0.000246207	0.00751659	-0.598093	0.163138	6.88587	0.100575	0.00603952	0.0338816	0.0120068	0.0338816
KRR1	ENST00000438169.6	0.000248595	0.00755143	-0.651007	0.177691	5.68324	0.134723	0.00723183	0.0401293	0.0200673	0.0401293
DGKH	ENST00000261491.9	0.000249224	0.00756362	-0.619465	0.169112	4.87603	0.0770921	0.00958681	-0.00297088	0.0333113	0.0333113
NASP	ENST00000350030.8	0.000255324	0.00770984	-0.633849	0.173332	8.64075	0.125182	0.00168089	0.0433849	0.010181	0.0433849
MYCBP	ENST00000465771.3	0.000256124	0.00773047	-3.32864	0.910444	2.59807	3.02639	0.798408	0.444955	0.425509	0.444955
UBA5	ENST00000264991.8	0.000259258	0.00781435	-1.2574	0.344215	4.92437	0.394872	0.145552	-0.029128	0.0321746	0.0321746
LCLAT1	ENST00000319406.8	0.000259836	0.0078282	-0.772727	0.211569	4.40738	0.12894	0.016236	0.00184269	0.0509061	0.0509061
PAG1	ENST00000220597.4	0.000263269	0.00791311	-1.18071	0.323572	3.64641	0.665796	0.0307377	0.0982131	0.126311	0.126311
ZNF714	ENST00000620627.1	0.000264386	0.00791948	-0.926773	0.254056	4.92812	0.224236	0.0647269	0.0165522	0.0320898	0.0320898
TMPO	ENST00000556678.1	0.000266127	0.00795615	-1.89044	0.518465	3.96667	0.722294	0.317741	-0.284978	0.0854683	0.0854683
C16orf54	ENST00000329410.4	0.000271057	0.00805985	-1.1278	0.309709	3.71114	0.28231	0.0270498	0.0188372	0.11683	0.11683
WDFY3	ENST00000514711.1	0.000271218	0.00806099	-0.870688	0.239112	4.71821	0.18375	0.0480619	0.0073614	0.0376997	0.0376997
PIK3R4	ENST00000356763.8	0.000275296	0.00816386	-0.654482	0.179926	7.15674	0.122188	0.000858276	0.047702	0.0111206	0.047702
MMP16	ENST00000286614.11	0.000277159	0.00820807	-0.696143	0.191471	7.21215	0.270423	0.000896922	0.0540948	0.010971	0.0540948
MAB21L3	ENST00000369500.3	0.000279312	0.00825886	-0.970562	0.267095	3.9747	0.229134	0.0223786	0.0326426	0.0846312	0.0846312
CMPK1	ENST00000450808.2	0.000279498	0.00825886	-0.95942	0.264041	4.53559	0.1952	0.0600278	-0.0305117	0.044549	0.044549
PUS7	ENST00000469408.6	0.000284567	0.00838245	-0.607657	0.167447	7.00654	0.118257	0.0120638	0.0299938	0.0115792	0.0299938
AHCTF1	ENST00000326225.3	0.000285501	0.00840621	-5.16469	1.42352	3.17151	12.5496	1.63899	1.40062	0.226879	1.40062
CFAP69	ENST00000475031.5	0.000289781	0.00850951	-0.89424	0.246737	4.17286	0.204567	0.0247499	0.00979999	0.0665686	0.0665686
STXBP5L	ENST00000273666.10	0.000291936	0.00856028	-0.796848	0.219981	4.43631	0.286622	0.0232405	0.0156498	0.0493468	0.0493468
AC139494.1	ENST00000610620.4	0.000292898	0.00858199	-0.619062	0.170941	5.79966	0.109531	0.00384223	0.0399888	0.0187187	0.0399888
HNRNPR	ENST00000635150.1	0.000296806	0.00867728	-0.648357	0.1792	4.61602	0.0946861	0.0069196	0.000694144	0.0412492	0.0412492
HNRNPR	ENST00000478691.5	0.000296806	0.00867728	-0.648357	0.1792	4.61602	0.0946861	0.0069196	0.000694144	0.0412492	0.0412492
RBIS	ENST00000612809.4	0.000302208	0.00880021	-0.730209	0.202084	5.18824	0.164498	0.0125671	0.0486895	0.0271311	0.0486895
AASS	ENST00000431170.5	0.00030806	0.00891177	-0.894856	0.247991	5.38469	0.251501	0.0680944	0.012231	0.0241546	0.0241546
EXOC6	ENST00000260762.10	0.000308807	0.00892949	-0.687575	0.19058	4.97981	0.11364	0.0235137	0.00173079	0.0309675	0.0309675
RPL6	ENST00000553205.1	0.000310868	0.00896949	-0.806142	0.223551	4.29036	0.146373	0.0169457	0.0104796	0.0580172	0.0580172
BIRC6	ENST00000648282.1	0.000320893	0.00919135	-0.681961	0.189548	6.43371	0.152397	0.0167041	0.0371888	0.0140481	0.0371888
U2SURP	ENST00000463563.6	0.000322454	0.00922733	-0.658615	0.183124	7.06348	0.146124	0.00563552	0.0446659	0.011396	0.0446659
WIPF1	ENST00000392547.6	0.00032372	0.00925953	-0.694118	0.19305	4.88024	0.248086	0.0226935	0.0206283	0.0332088	0.0332088
P2RY10	ENST00000171757.3	0.000332717	0.0094515	-2.63406	0.734049	2.31966	1.67069	0.254202	0.10018	0.554041	0.554041
RIMS2	ENST00000262231.14	0.000332945	0.00945391	-1.1292	0.314698	3.96124	0.324981	0.0625125	0.0514505	0.0860395	0.0860395
ARHGAP11A	ENST00000565905.5	0.000333588	0.00946406	-0.709353	0.197717	6.70196	0.159668	0.0458699	-0.00530547	0.0127682	0.0127682
NASP	ENST00000453748.5	0.000337894	0.00954528	-1.0025	0.279687	8.18144	0.278189	0.00232391	0.115013	0.00982662	0.115013
GBGT1	ENST00000372043.7	0.000339163	0.00957297	-4.44594	1.24071	1.64228	5.11258	1.33357	0.503681	0.975456	0.975456
ZRANB2	ENST00000370920.8	0.000340894	0.00960952	-0.675673	0.188627	5.54829	0.130205	0.031489	0.0110241	0.0218812	0.0218812
MCM2	ENST00000491422.1	0.000342499	0.00964245	-4.03576	1.12704	1.35746	4.14024	0.703391	0.741882	1.20195	1.20195
ROCK2	ENST00000401753.5	0.000344419	0.00967899	-0.898398	0.250993	5.79802	0.228431	0.0283564	0.0661399	0.0187362	0.0661399
FAM47E-STBD1	ENST00000514140.1	0.000345277	0.00969588	-0.677576	0.189335	4.99052	0.119907	0.0230265	0.0209345	0.0307449	0.0307449
H4C3	ENST00000377803.3	0.000345678	0.00970305	-1.14979	0.321311	3.80627	0.613187	0.0274105	0.127451	0.104049	0.127451
IFT81	ENST00000552912.5	0.000346718	0.00972397	-0.604236	0.168892	5.59242	0.183219	0.02151	0.0156094	0.021277	0.021277
TMTC2	ENST00000546590.2	0.000347562	0.00974117	-4.45142	1.24446	1.78361	5.58278	1.44926	0.85158	0.873749	0.873749
AK6	ENST00000512561.5	0.000349343	0.00976037	-0.943454	0.263854	4.05067	0.198721	0.0272984	0.00992518	0.0771302	0.0771302
AK6	ENST00000617079.4	0.000349343	0.00976037	-0.943454	0.263854	4.05067	0.198721	0.0272984	0.00992518	0.0771302	0.0771302
CLDND1	ENST00000341181.11	0.000355274	0.00986358	-0.586963	0.164358	7.04906	0.0952928	0.00159662	0.0389235	0.0114413	0.0389235
G3BP1	ENST00000520177.5	0.000373407	0.0102594	-0.908255	0.255257	7.42045	0.244392	0.00557953	0.0921547	0.0104968	0.0921547
SNX18P3	ENST00000565670.1	0.000373272	0.0102594	-0.628709	0.176688	5.32367	0.132149	0.00748812	0.03934	0.0250374	0.03934
USP15	ENST00000549268.1	0.000375898	0.0103107	-0.900385	0.253169	4.16578	0.225555	0.0290094	0.0637352	0.0671328	0.0671328
CADPS2	ENST00000397721.4	0.00038812	0.010602	-0.822776	0.231896	5.37635	0.211957	0.0563903	0.0241666	0.0242736	0.0242736
SCG3	ENST00000542355.6	0.000388753	0.0106062	-0.690072	0.194518	6.20356	0.137711	0.0277826	0.0289732	0.0153713	0.0289732
UBE2Q2	ENST00000561851.5	0.000401359	0.0108731	-0.984269	0.278106	4.92393	0.242326	0.0838297	-0.034937	0.0321846	0.0321846
EEF2	ENST00000598436.1	0.000401497	0.0108731	-1.22491	0.346109	4.24865	0.553773	0.0756496	0.104037	0.0608827	0.104037
RSKR	ENST00000584196.1	0.000402887	0.0108974	-0.626401	0.17704	4.85268	0.0918597	0.0131235	-0.000341204	0.0338914	0.0338914
PFN1P2	ENST00000604437.2	0.00041141	0.0110736	-1.22835	0.347713	3.51058	0.387681	0.0329557	0.105687	0.1484	0.1484
AHSA1	ENST00000556866.5	0.000420664	0.0112722	-1.72076	0.487914	4.897	0.684504	0.324282	-0.172026	0.0328079	0.0328079
POU2F1	ENST00000429375.6	0.000427046	0.0114017	-5.22224	1.48242	2.76834	7.96353	1.59362	1.70273	0.359337	1.70273
PNN	ENST00000554902.5	0.000431538	0.0114984	-4.30772	1.22378	1.68459	5.88229	0.972079	1.27438	0.944287	1.27438
PSMD12	ENST00000357146.4	0.000432455	0.0115136	-1.00784	0.286364	5.44131	0.33946	0.0485206	0.0744863	0.0233567	0.0744863
SACS	ENST00000382292.9	0.000433442	0.0115241	-0.727209	0.206662	7.32487	0.162821	0.0155204	0.0485431	0.0106975	0.0485431
TOR1AIP1	ENST00000271583.7	0.000435443	0.0115606	-5.30015	1.50675	2.71232	7.84145	1.8318	1.57363	0.380051	1.57363
USP33	ENST00000524536.5	0.000435864	0.0115671	-0.867024	0.246499	4.53811	0.210637	0.0248002	0.0663421	0.0444379	0.0663421
BZW1	ENST00000409600.6	0.000439375	0.0116386	-0.853411	0.242775	7.67278	0.264224	0.000901767	0.087508	0.0100973	0.087508
TTC3	ENST00000399017.6	0.000441926	0.0116765	-1.77314	0.504637	3.96396	0.890815	0.195451	0.186538	0.0857521	0.186538
FBLN1	ENST00000340923.9	0.000444501	0.0117211	-0.697932	0.198719	4.85352	0.135211	0.0253641	0.033025	0.0338701	0.0338701
DKK3	ENST00000527132.1	0.000456078	0.0119691	-4.30021	1.22677	2.13515	5.51509	1.58881	0.668638	0.652238	0.668638
NUB1	ENST00000483358.5	0.00046455	0.0121289	-0.699731	0.1999	5.07089	0.291792	0.0307671	-0.00607154	0.0291728	0.0291728
SEMA6A	ENST00000515009.5	0.000474904	0.0123554	-5.11747	1.46442	2.67278	8.21056	1.38355	1.83326	0.395295	1.83326
RECQL	ENST00000421138.6	0.000477502	0.0123937	-0.598126	0.171232	6.05267	0.123267	0.0166421	0.0273387	0.0164294	0.0273387
IRF3	ENST00000593818.5	0.000480219	0.0124545	-4.19735	1.20214	1.83383	3.92235	1.32843	-1.05339	0.839294	0.839294
BIRC3	ENST00000263464.8	0.000482271	0.0124979	-2.77922	0.796244	2.4036	2.27109	0.438293	-0.0263687	0.512714	0.512714
YLPM1	ENST00000554107.2	0.000482586	0.0125011	-0.766301	0.219555	4.39499	0.166736	0.0151629	0.057144	0.0515973	0.057144
ERGIC2	ENST00000552155.5	0.0004945	0.0127201	-0.657886	0.188846	4.74085	0.126272	0.0164784	0.0370158	0.0369965	0.0370158
TASOR2	ENST00000645567.1	0.00049533	0.0127266	-0.936382	0.268823	6.69601	0.26425	0.0234554	0.0849432	0.0127949	0.0849432
DMTF1	ENST00000447863.5	0.000495307	0.0127266	-4.14476	1.1899	3.41458	5.8237	1.29318	0.830621	0.166896	0.830621
IRF4	ENST00000380956.9	0.000498535	0.0127941	-0.806507	0.231652	4.23368	0.143232	0.0185382	0.00933211	0.0619559	0.0619559
GUF1	ENST00000506793.5	0.000508164	0.0129858	-5.17755	1.48933	2.70672	9.4207	2.78198	0.545201	0.382178	0.545201
HERC5	ENST00000508159.1	0.000509979	0.0130221	-3.68209	1.05945	3.78449	3.90671	1.41397	0.269689	0.106856	0.269689
CLN5	ENST00000485938.4	0.000510212	0.013023	-0.640989	0.184439	4.99372	0.125123	0.00778736	0.0432395	0.030679	0.0432395
CDK5RAP1	ENST00000496381.5	0.000513807	0.0130871	-4.66166	1.34208	1.78891	5.78543	1.83171	0.380828	0.870074	0.870074
FERMT2	ENST00000343279.8	0.000514441	0.0130956	-1.02486	0.295082	6.68597	0.361455	0.0898306	0.0407797	0.01284	0.0407797
TUT4	ENST00000371541.5	0.000516901	0.013143	-0.740368	0.213249	4.72172	0.153877	0.0306241	0.0121564	0.0375889	0.0375889
KIRREL1	ENST00000368173.7	0.000521454	0.0132334	-4.22872	1.21883	3.30593	5.36074	1.99328	0.235052	0.191398	0.235052
NEO1	ENST00000558485.1	0.000526218	0.0133431	-3.9038	1.12597	1.3719	4.04576	0.711978	0.834058	1.18974	1.18974
ADCY2	ENST00000489501.1	0.000528565	0.0133824	-0.741805	0.214033	4.39024	0.163393	0.0168495	0.0210578	0.0518656	0.0518656
TCEAL9	ENST00000372656.5	0.000528529	0.0133824	-0.923909	0.266574	5.43978	0.24009	0.0165017	0.0900909	0.0233781	0.0900909
SCD5	ENST00000273908.4	0.000536625	0.013525	-1.03699	0.299554	3.80182	0.274907	0.0299819	0.0478184	0.104617	0.104617
MYO1B	ENST00000392316.5	0.000537847	0.0135506	-1.14815	0.331724	5.8175	0.478733	0.0827647	0.0822961	0.0185307	0.0822961
SH3D19	ENST00000409252.6	0.000539692	0.0135868	-0.898487	0.25966	6.07009	0.413478	0.0331298	0.0680054	0.0162974	0.0680054
HNRNPD	ENST00000514671.5	0.000540562	0.0135983	-0.986049	0.285001	5.25576	0.468906	0.095779	-0.013942	0.0260596	0.0260596
CLEC2D	ENST00000444971.6	0.000548325	0.013757	-3.25387	0.941522	2.21301	2.68769	0.720166	0.137961	0.609528	0.609528
RAD50	ENST00000533482.5	0.000551654	0.0138143	-0.773624	0.223957	6.59932	0.245305	0.00701063	0.0682248	0.0132367	0.0682248
ELOVL6	ENST00000394607.7	0.000557806	0.0139315	-0.589045	0.170671	6.87902	0.106999	0.0017012	0.0419918	0.0120327	0.0419918
POLR2J3	ENST00000511313.5	0.000566245	0.014105	-0.653647	0.189612	4.73342	0.126729	0.0110725	0.0428565	0.0372244	0.0428565
OS9	ENST00000389146.10	0.000571389	0.0141959	-4.6948	1.36285	1.95401	6.42441	1.80873	0.977298	0.760574	0.977298
ZNF2	ENST00000614034.5	0.000572071	0.0142073	-3.73007	1.0829	2.8048	4.18253	1.19712	0.561883	0.346399	0.561883
TERF1	ENST00000517390.1	0.000584896	0.0144391	-1.16819	0.339735	5.21849	0.386665	0.0303731	0.142756	0.0266433	0.142756
ATP6V1C1	ENST00000521514.5	0.000594719	0.0146379	-0.630814	0.183696	5.97707	0.121552	0.00763163	0.0429847	0.0170363	0.0429847
HMGB1P5	ENST00000255320.6	0.000596201	0.014658	-0.672058	0.195745	6.82786	0.128789	0.00303648	0.0544376	0.0122322	0.0544376
TRPM3	ENST00000377110.7	0.000597078	0.0146691	-1.24962	0.364009	3.5705	0.732699	0.0604936	-0.00367794	0.13826	0.13826
RPS26	ENST00000646449.2	0.000598748	0.0146988	-0.586627	0.17092	5.38151	0.0979843	0.0159757	0.0278446	0.0242	0.0278446
IDI1	ENST00000381344.7	0.000601141	0.0147411	-0.884242	0.257714	6.97163	0.238908	0.0011045	0.0985201	0.0116973	0.0985201
HNRNPD	ENST00000313899.12	0.000607146	0.0148388	-0.599729	0.174929	6.10834	0.104586	0.00576432	0.0401362	0.0160172	0.0401362
LRRC4B	ENST00000652263.1	0.000619827	0.0150863	-0.958605	0.280066	4.72647	0.233558	0.0802148	-0.000627667	0.0374402	0.0374402
ADAM10	ENST00000558733.5	0.000626677	0.0151816	-0.669424	0.19575	6.02604	0.131066	0.00747813	0.0499987	0.0166366	0.0499987
IKBKGP1	ENST00000612193.1	0.000626581	0.0151816	-4.23381	1.23802	1.64279	4.84366	1.32395	0.561381	0.975073	0.975073
ATRX	ENST00000395603.7	0.000632501	0.0152846	-0.707096	0.206918	7.47848	0.163666	0.0367183	0.0275041	0.0103885	0.0275041
PABPN1	ENST00000557702.5	0.00063818	0.0153646	-0.712827	0.208743	5.70796	0.145987	0.0233605	0.0420002	0.0197621	0.0420002
VRK2	ENST00000440705.6	0.000640635	0.0154125	-5.23058	1.53219	2.08135	6.56421	2.83829	-1.00178	0.683101	0.683101
RUNX3	ENST00000308873.10	0.000643975	0.0154592	-1.89474	0.555255	3.03408	0.964703	0.193926	-0.0965537	0.268536	0.268536
NBPF9	ENST00000611593.1	0.000648219	0.0155328	-0.937252	0.274806	4.41742	0.250721	0.0184284	0.0948492	0.0503565	0.0948492
HK2	ENST00000409174.1	0.000654407	0.0156584	-1.41734	0.415887	6.33619	0.518668	0.244868	-0.132185	0.0145744	0.0145744
STT3B	ENST00000488151.1	0.000656867	0.0157045	-0.633827	0.186038	4.99409	0.107503	0.0212436	-0.00443015	0.0306715	0.0306715
ODF2L	ENST00000359242.7	0.000661414	0.0157879	-0.967838	0.284233	4.07016	0.240775	0.045858	0.040937	0.0753242	0.0753242
LRRCC1	ENST00000360375.8	0.000665132	0.015847	-0.684156	0.201012	5.04289	0.171194	0.0183385	0.0422701	0.0297022	0.0422701
COX7B	ENST00000475465.1	0.000675221	0.0160018	-0.645786	0.189968	5.07789	0.127762	0.0136823	0.0404493	0.0290433	0.0404493
CBX5	ENST00000550411.5	0.00069506	0.0163522	-0.735783	0.216948	4.70132	0.143369	0.0323567	0.021108	0.0382429	0.0382429
ZNF569	ENST00000392149.6	0.000709328	0.0165945	-5.11602	1.51096	1.95729	6.18601	2.66598	-0.987013	0.758501	0.758501
DNAJA1	ENST00000330899.5	0.000727693	0.0169462	-0.782582	0.231607	8.1051	0.179326	0.000347122	0.0801154	0.00982311	0.0801154
NAA25	ENST00000552527.5	0.000730048	0.0169831	-1.06967	0.316653	4.50818	0.407202	0.0972756	0.0531284	0.045791	0.0531284
FAM111B	ENST00000343597.4	0.000743925	0.0172151	-0.901338	0.267233	6.195	0.251225	0.0450543	0.0620658	0.0154266	0.0620658
SMG1P3	ENST00000520823.6	0.000746451	0.0172615	-1.10086	0.326478	5.19962	0.269627	0.132936	-0.0764652	0.0269461	0.0269461
DDX52	ENST00000615769.2	0.000747834	0.0172814	-0.707185	0.209759	5.24308	0.133963	0.0397422	0.00753351	0.0262562	0.0262562
GCC2	ENST00000409821.5	0.000750166	0.0173184	-1.32946	0.394433	4.15026	0.543632	0.0795345	0.153831	0.0683884	0.153831
SMC2	ENST00000374787.7	0.00075022	0.0173184	-0.691125	0.205049	6.64618	0.168894	0.00843048	0.0546371	0.0130204	0.0546371
PABPC4	ENST00000372862.7	0.000750573	0.0173205	-0.974833	0.289233	5.76593	0.405519	0.0791458	0.0463378	0.0190869	0.0463378
TRHDE	ENST00000549138.5	0.000753101	0.0173728	-3.5785	1.06203	1.57481	3.03872	0.665433	-0.502713	1.02644	1.02644
SHANK2	ENST00000449833.6	0.000753836	0.0173837	-5.27966	1.56703	2.50134	5.99244	3.21603	-2.83537	0.467356	0.467356
KLRK1	ENST00000544449.5	0.000758878	0.0174817	-2.36631	0.702716	2.41827	1.37861	0.235001	0.047322	0.505713	0.505713
PDE4DIP	ENST00000529945.2	0.000771125	0.0177145	-0.612994	0.182278	6.49602	0.118411	0.00321392	0.0466242	0.0137326	0.0466242
YIPF1	ENST00000371399.5	0.000794488	0.0181378	-4.79973	1.43074	1.84002	5.64605	2.23543	-0.520022	0.835109	0.835109
KNTC1	ENST00000450485.6	0.00079756	0.0181891	-0.819468	0.244352	5.0331	0.193094	0.0260697	0.063492	0.0298917	0.063492
TRMT112	ENST00000535750.5	0.000805792	0.0183452	-0.590112	0.176111	5.47546	0.106995	0.0198378	0.0266848	0.0228825	0.0266848
WBP11	ENST00000535638.5	0.000812337	0.0184688	-2.44996	0.731646	5.05153	1.73098	0.436047	0.366913	0.0295368	0.366913
AC022182.3	ENST00000529239.1	0.000813765	0.0184949	-0.956784	0.285772	3.83179	0.258411	0.0216495	0.0939771	0.100849	0.100849
PCNA	ENST00000379143.10	0.00083639	0.018957	-0.708406	0.212068	8.04659	0.153169	0.000335067	0.0671244	0.0098309	0.0671244
ZNF615	ENST00000391795.7	0.000839963	0.0190055	-4.80226	1.43811	2.07736	6.95776	1.29641	1.80585	0.685434	1.80585
AKAP12	ENST00000359755.5	0.000850066	0.0191969	-1.30289	0.390561	7.13928	0.511676	0.215975	0.0128317	0.0111699	0.0128317
NBPF19	ENST00000426482.3	0.000852051	0.0192264	-1.28868	0.386375	5.30231	0.555871	0.029209	0.194719	0.0253539	0.194719
KMT5B	ENST00000304363.9	0.000863634	0.0193959	-0.825298	0.247722	4.73108	0.203792	0.0372021	0.0548471	0.0372968	0.0548471
GTF2H2	ENST00000274400.9	0.000864364	0.0193983	-0.690302	0.207216	5.52246	0.144997	0.0249564	0.0394513	0.0222352	0.0394513
EIF4E2	ENST00000409098.5	0.000866937	0.019441	-0.760776	0.228428	6.93211	0.173426	0.00493941	0.0733294	0.0118364	0.0733294
DARS1	ENST00000422708.3	0.000902179	0.0200498	-0.796198	0.239864	4.96201	0.162931	0.0549572	-0.020115	0.0313447	0.0313447
KIF22	ENST00000563263.1	0.00091255	0.0202124	-3.83693	1.15703	2.62346	4.27142	0.815471	1.19261	0.415032	1.19261
PYM1	ENST00000398213.4	0.000915544	0.0202719	-1.04157	0.314174	4.7849	0.342088	0.0826772	0.0653812	0.0357042	0.0653812
MRPS28	ENST00000519120.1	0.000934741	0.0205666	-0.960759	0.290306	4.30034	0.275048	0.0690587	0.0069397	0.0573579	0.0573579
TNPO2	ENST00000589149.5	0.000954079	0.0209233	-3.49185	1.05694	1.65273	3.56223	0.653045	1.02264	0.967698	1.02264
CLIC1	ENST00000375779.6	0.000962206	0.020989	-0.97817	0.296294	4.92678	0.354549	0.0418053	0.0898797	0.0321201	0.0898797
CLIC1	ENST00000423804.5	0.000962206	0.020989	-0.97817	0.296294	4.92678	0.354549	0.0418053	0.0898797	0.0321201	0.0898797
CLIC1	ENST00000438708.5	0.000962206	0.020989	-0.97817	0.296294	4.92678	0.354549	0.0418053	0.0898797	0.0321201	0.0898797
CLIC1	ENST00000434202.5	0.000962206	0.020989	-0.97817	0.296294	4.92678	0.354549	0.0418053	0.0898797	0.0321201	0.0898797
CLIC1	ENST00000423055.5	0.000962206	0.020989	-0.97817	0.296294	4.92678	0.354549	0.0418053	0.0898797	0.0321201	0.0898797
CLIC1	ENST00000383404.6	0.000962206	0.020989	-0.97817	0.296294	4.92678	0.354549	0.0418053	0.0898797	0.0321201	0.0898797
CLIC1	ENST00000423143.5	0.000962206	0.020989	-0.97817	0.296294	4.92678	0.354549	0.0418053	0.0898797	0.0321201	0.0898797
ATF7IP2	ENST00000535850.5	0.000965233	0.0210204	-3.94933	1.1966	1.63607	4.00398	1.16768	0.209262	0.980081	0.980081
NBPF19	ENST00000651566.1	0.000968112	0.0210415	-0.698617	0.211726	4.49142	0.162488	0.0206606	0.042073	0.046581	0.046581
CUX1	ENST00000646649.1	0.000996069	0.0214658	-4.89907	1.48834	2.21256	6.49586	2.71297	-0.676333	0.609765	0.609765
KIAA1109	ENST00000388738.7	0.00100497	0.0216224	-4.41113	1.34112	4.60995	5.672	2.3338	0.364108	0.0414814	0.364108
NOP56	ENST00000492135.5	0.00101011	0.0216882	-0.76045	0.231302	7.1386	0.227361	0.00445607	0.0757948	0.0111719	0.0757948
PDE7A	ENST00000396642.7	0.00101502	0.0217749	-1.00355	0.30537	3.822	0.296009	0.0378114	0.0966773	0.102065	0.102065
PTPN13	ENST00000511467.1	0.00103229	0.0220542	-0.695034	0.211799	7.39877	0.141316	0.0150327	0.0522553	0.0105399	0.0522553
MAP9	ENST00000650955.1	0.00104271	0.0221747	-0.597272	0.182165	6.00179	0.13489	0.0329447	0.0158944	0.0168314	0.0168314
AHNAK	ENST00000378024.9	0.00106768	0.0225969	-1.1775	0.359867	6.29496	0.427606	0.00195055	0.192306	0.0148109	0.192306
ARGLU1	ENST00000375926.5	0.00107074	0.0226398	-0.782807	0.239299	5.47407	0.179612	0.0174554	0.0684405	0.0229017	0.0684405
NPEPPS	ENST00000602788.5	0.00107152	0.0226418	-0.917788	0.28058	4.14011	0.253515	0.0239766	0.0941108	0.0692255	0.0941108
RSF1	ENST00000526324.5	0.00107222	0.0226442	-0.667433	0.204054	5.49914	0.126925	0.0399015	-0.00138076	0.0225558	0.0225558
CNIH1	ENST00000553660.5	0.00107487	0.0226608	-0.596959	0.182547	5.65361	0.109872	0.0231925	0.0267928	0.0204477	0.0267928
HMGB1	ENST00000341423.10	0.00108984	0.0228756	-0.780714	0.239025	6.39009	0.220053	0.00685984	0.0788396	0.0142781	0.0788396
BTAF1	ENST00000471217.5	0.00109698	0.0229838	-0.672983	0.206159	4.89736	0.132793	0.0160969	0.0476552	0.0327994	0.0476552
RPS6KA2	ENST00000510118.5	0.00110417	0.0231104	-5.43203	1.66497	2.81731	8.65129	1.57221	2.58598	0.342014	2.58598
PTCD3	ENST00000483925.1	0.00111916	0.0233356	-4.34039	1.33193	2.27982	5.68583	1.03495	1.62611	0.574391	1.62611
CHD1L	ENST00000369259.4	0.00112475	0.0234226	-4.9451	1.51816	2.41605	5.55972	2.95043	-2.86693	0.506766	0.506766
SYNE2	ENST00000557060.1	0.00112697	0.0234613	-0.888163	0.272715	4.37011	0.233579	0.0284914	0.0830686	0.0530282	0.0830686
NUP107	ENST00000229179.9	0.00112967	0.0235102	-0.835634	0.256639	4.21755	0.2209	0.0356561	0.0377921	0.0631393	0.0631393
RFC1	ENST00000502706.1	0.00113941	0.0236756	-3.71501	1.1418	2.04662	3.34724	1.25195	-0.240613	0.70362	0.70362
NAP1L1	ENST00000551992.5	0.00114195	0.023721	-0.70149	0.215644	5.36131	0.22654	0.0230005	0.0467531	0.0244896	0.0467531
CEP170	ENST00000451408.2	0.00114268	0.023723	-1.37233	0.421891	4.78246	0.47661	0.231215	-0.0761919	0.0357733	0.0357733
RSBN1	ENST00000616024.4	0.00114353	0.023724	-3.25365	1.00032	3.3658	3.19722	1.26749	0.233476	0.177425	0.233476
BCLAF1	ENST00000527536.5	0.00115769	0.0239876	-0.588311	0.181069	7.56083	0.105071	0.0134656	0.0357132	0.0102518	0.0357132
CD5	ENST00000347785.8	0.00116305	0.0240762	-2.6617	0.819541	1.88341	3.52773	0.201301	0.0322561	0.806169	0.806169
LARP1B	ENST00000507377.1	0.00116562	0.0241218	-0.642426	0.197842	5.26405	0.123495	0.0236606	0.0350516	0.0259321	0.0350516
ZNF519	ENST00000624133.1	0.00117578	0.0242779	-0.759748	0.234151	4.45401	0.160749	0.0338108	0.0341137	0.0484294	0.0484294
RANBP2	ENST00000283195.11	0.00117653	0.0242792	-0.614478	0.18939	9.07447	0.118719	0.000133196	0.0536697	0.0110842	0.0536697
UBA5	ENST00000468227.5	0.0011779	0.0242952	-1.03489	0.319001	3.84256	0.287617	0.053116	0.0547287	0.0995262	0.0995262
GULP1	ENST00000476422.5	0.00118787	0.0244295	-1.50477	0.464182	4.69443	0.552657	0.284729	-0.116697	0.0384691	0.0384691
HSPA8	ENST00000534624.6	0.0011958	0.0245314	-0.994453	0.306941	10.2121	0.291721	4.11869e-05	0.141278	0.017165	0.141278
WRN	ENST00000650667.1	0.00120823	0.0247634	-0.830001	0.256416	6.53804	0.232182	0.0160437	0.0825801	0.0135272	0.0825801
CCDC25	ENST00000522915.5	0.00121277	0.0248412	-0.738434	0.228203	4.71156	0.20086	0.0402035	0.00412798	0.0379117	0.0379117
RGMA	ENST00000650169.1	0.00121351	0.0248465	-4.05813	1.25418	1.37086	4.00925	1.16883	0.0562862	1.19062	1.19062
MRRF	ENST00000373729.5	0.00121855	0.0249155	-0.594595	0.183829	4.94561	0.0854906	0.0189888	0.00657389	0.0317008	0.0317008
MINPP1	ENST00000472891.1	0.00122086	0.0249459	-3.65373	1.1298	1.89523	3.31389	1.11627	-0.0450258	0.798404	0.798404
NXPH2	ENST00000272641.4	0.00123778	0.0252284	-1.53562	0.47542	3.02492	0.530181	0.0675586	0.0305159	0.271478	0.271478
NUF2	ENST00000367900.7	0.00124115	0.0252867	-0.597928	0.18516	5.64993	0.176678	0.0309304	0.0089333	0.020496	0.020496
GRID2	ENST00000637838.1	0.00124926	0.0254076	-0.592967	0.18373	5.35899	0.15133	0.00489468	0.0457402	0.0245231	0.0457402
EIF4G1	ENST00000424196.5	0.00125416	0.0254921	-3.9134	1.21298	1.54267	4.6483	1.15568	0.97967	1.0513	1.0513
PWWP3A	ENST00000590695.2	0.00126905	0.0256839	-0.838087	0.260042	4.04535	0.16923	0.023802	0.0256442	0.077631	0.077631
VKORC1L1	ENST00000648179.1	0.00127117	0.025711	-1.46454	0.454485	6.89222	0.577137	0.297852	-0.0881033	0.0119829	0.0119829
ACLY	ENST00000353196.5	0.00129387	0.0260518	-0.902563	0.280531	7.25887	0.346262	0.0383475	0.0796992	0.0108527	0.0796992
ZBTB41	ENST00000367405.4	0.00130292	0.0262089	-0.668682	0.207966	5.22122	0.134071	0.0100493	0.0548257	0.0265999	0.0548257
NAA50	ENST00000497525.5	0.00130646	0.0262561	-0.932344	0.290038	5.73367	0.298002	0.0459831	0.0801999	0.0194558	0.0801999
CLEC2B	ENST00000228438.2	0.00131673	0.0263904	-2.61878	0.815232	1.98895	2.01789	0.258204	0.326679	0.7387	0.7387
STXBP4	ENST00000434978.6	0.00132173	0.0264827	-0.700114	0.218021	4.52695	0.119785	0.0263661	0.00995365	0.0449338	0.0449338
CEP350	ENST00000367607.8	0.00132749	0.0265499	-0.605904	0.188757	7.37951	0.109007	0.00114041	0.0523033	0.0105793	0.0523033
ZNF317	ENST00000590152.1	0.00134655	0.0268256	-1.48551	0.463372	3.5853	0.683399	0.178264	0.143807	0.135859	0.143807
TRPM6	ENST00000360774.6	0.00135362	0.0269178	-3.85922	1.20436	1.45614	4.19327	1.05564	0.674949	1.12009	1.12009
IL32	ENST00000528163.6	0.00135838	0.0269739	-3.30269	1.03101	2.64041	3.09626	1.18632	0.204535	0.408159	0.408159
HPRT1	ENST00000475720.1	0.00136211	0.0269992	-0.627385	0.195901	4.89646	0.116383	0.0247452	0.0012259	0.0328207	0.0328207
SON	ENST00000484294.5	0.00136471	0.0270409	-3.15925	0.986644	2.57955	3.68087	1.02692	0.269087	0.433284	0.433284
HNRNPA1	ENST00000551702.5	0.00137586	0.0272291	-2.7879	0.871309	2.24792	2.07632	0.547751	0.253124	0.591017	0.591017
NDEL1	ENST00000582665.5	0.00138662	0.0273929	-3.5873	1.12193	1.3948	4.35779	0.634354	1.25375	1.17054	1.25375
EHBP1	ENST00000431489.5	0.00139401	0.0274978	-0.704889	0.220561	6.55917	0.161581	0.0400239	0.032947	0.0134259	0.032947
CDKL5	ENST00000623610.1	0.00139486	0.0274981	-1.39221	0.435649	3.19292	0.4269	0.0638261	0.011725	0.220859	0.220859
DYNC1H1	ENST00000645039.1	0.00140119	0.0275902	-0.674382	0.211113	7.86027	0.148844	0.0105757	0.0562776	0.00991647	0.0562776
GRIA4	ENST00000428631.6	0.00141244	0.0277549	-3.75719	1.17703	3.01209	4.57971	1.15678	0.921317	0.275635	0.921317
ATE1	ENST00000543447.5	0.00142503	0.0279679	-4.3334	1.35863	1.54371	4.67972	1.71832	-0.188037	1.0505	1.0505
DDX5	ENST00000225792.9	0.00143905	0.0281707	-2.72164	0.854061	7.09583	2.09636	1.08283	-0.29846	0.0112971	0.0112971
CNIH1	ENST00000395573.8	0.00144685	0.0282397	-0.670897	0.210634	4.93852	0.144053	0.0346925	-0.00644147	0.0318572	0.0318572
MPHOSPH6	ENST00000563504.5	0.00146016	0.0284298	-3.92734	1.23405	1.94384	4.6107	1.13439	1.14991	0.767031	1.14991
SNRPD2	ENST00000391932.7	0.00146334	0.0284788	-0.927854	0.291608	4.62265	0.258741	0.0450624	0.0824902	0.0409986	0.0824902
ZNF558	ENST00000597304.5	0.00148147	0.028746	-2.08419	0.655759	2.93561	1.26521	0.343958	-0.23989	0.301072	0.301072
HSPH1	ENST00000626866.2	0.00149109	0.0288958	-2.56627	0.807916	2.10052	1.71639	0.307115	0.332381	0.671977	0.671977
NDUFAF8	ENST00000576002.1	0.00149706	0.0289861	-3.50577	1.10409	1.95872	2.85617	1.07092	-0.429231	0.7576	0.7576
SRSF11	ENST00000461935.1	0.00150159	0.0290397	-0.653963	0.206013	4.49524	0.145246	0.0172633	-0.00360989	0.0463988	0.0463988
MYL6	ENST00000548580.5	0.00150613	0.0291106	-0.590902	0.186199	5.61645	0.111888	0.00688348	0.0451215	0.0209478	0.0451215
ENTPD2	ENST00000312665.7	0.00151352	0.0292023	-4.14167	1.30567	1.33571	4.10574	1.33665	-0.155978	1.2205	1.2205
NA	ENST00000640289.1	0.0015155	0.0292292	-0.589237	0.185779	6.25679	0.126011	0.0113128	0.0404582	0.0150386	0.0404582
ZC3H12B	ENST00000338957.4	0.00151796	0.0292453	-0.609547	0.192212	4.54503	0.120321	0.0112827	0.0222031	0.0441354	0.0441354
MAPRE2	ENST00000591734.5	0.0015275	0.0293531	-3.38362	1.06759	2.26425	3.28524	1.12714	0.21062	0.58247	0.58247
ARFGAP1	ENST00000353546.7	0.00152844	0.0293531	-3.29633	1.04011	3.13055	3.75759	0.971122	0.651608	0.238768	0.651608
PABPC1	ENST00000519004.5	0.00154252	0.0295634	-5.41726	1.71077	4.74156	15.4077	0.955049	3.43505	0.0369749	3.43505
MACF1	ENST00000469490.1	0.00155841	0.0297646	-0.854155	0.269996	5.50748	0.284097	0.0164006	0.0929465	0.022441	0.0929465
ABI2	ENST00000295851.10	0.00156252	0.0298173	-0.591093	0.186888	5.07725	0.144332	0.0212027	0.0311881	0.0290551	0.0311881
NPIPA1	ENST00000328085.10	0.00163145	0.0308655	-0.672871	0.213594	5.09077	0.120927	0.0396261	0.00813616	0.0288079	0.0288079
TERF1	ENST00000522018.1	0.00164637	0.0310855	-1.16064	0.368742	4.54725	0.405558	0.0344909	0.169465	0.0440395	0.169465
SORBS2	ENST00000448662.6	0.00165238	0.0311458	-1.20073	0.381609	5.06502	0.561941	0.0241108	0.194327	0.0292823	0.194327
KDM1B	ENST00000650836.1	0.00166998	0.0314326	-0.776853	0.247138	4.72671	0.199435	0.0508373	0.0407783	0.0374326	0.0407783
DNA2	ENST00000399179.6	0.00167738	0.031545	-0.819471	0.260803	5.11399	0.174226	0.0736353	-0.0110026	0.0283922	0.0283922
DNA2	ENST00000399180.3	0.00167738	0.031545	-0.819471	0.260803	5.11399	0.174226	0.0736353	-0.0110026	0.0283922	0.0283922
BZW1	ENST00000409226.5	0.00171251	0.0320509	-0.827283	0.263799	7.82718	0.256968	0.000999631	0.103386	0.00994141	0.103386
ARHGEF9	ENST00000624210.3	0.0017155	0.0320977	-4.16798	1.32928	2.68531	4.44032	2.26007	-0.869912	0.390408	0.390408
PCLAF	ENST00000300035.9	0.00172903	0.0323088	-0.642208	0.204968	4.91482	0.17192	0.0153467	0.047671	0.0323927	0.047671
MUC4	ENST00000626947.2	0.00173067	0.0323266	-4.47746	1.42916	1.90054	6.10071	2.2688	0.475608	0.794935	0.794935
ANKRD11	ENST00000642443.1	0.00174203	0.0324774	-3.01359	0.962497	3.78767	2.71196	1.28316	-0.633325	0.106441	0.106441
EIF3J	ENST00000558053.1	0.00175494	0.0326601	-1.00548	0.321359	4.48415	0.35002	0.107977	0.0119776	0.0469305	0.0469305
TRPC4	ENST00000338947.9	0.00176367	0.0327629	-4.00205	1.27968	1.51695	4.79495	1.3849	0.873127	1.07146	1.07146
SERINC5	ENST00000502747.1	0.00176673	0.0327896	-1.40061	0.447927	3.1153	0.482723	0.0576475	0.0936013	0.243311	0.243311
SLC7A8	ENST00000525062.1	0.00177663	0.0329388	-1.52233	0.487107	4.23207	0.878854	0.274631	0.0812798	0.062073	0.0812798
AL356432.3	ENST00000568952.1	0.00178295	0.0330236	-1.30114	0.416473	4.56343	0.835966	0.127031	0.133144	0.0433503	0.133144
SLC35B2	ENST00000495706.1	0.00178404	0.0330345	-4.80022	1.53656	1.6015	5.34128	2.53543	-1.20765	1.00608	1.00608
EIF3B	ENST00000463229.2	0.00180301	0.0333112	-5.22216	1.67329	2.97446	8.46348	1.54346	2.65638	0.288014	2.65638
AP1B1	ENST00000415447.5	0.00180977	0.0334081	-4.63639	1.48612	3.53932	6.64037	1.71744	1.59539	0.14343	1.59539
SHTN1	ENST00000355371.9	0.00181697	0.0334603	-3.94385	1.26461	1.86927	4.14753	1.58334	-0.963995	0.815522	0.815522
RTN4	ENST00000438462.1	0.00183962	0.0337893	-3.40601	1.09343	3.01123	3.06321	1.51748	-0.34421	0.275915	0.275915
TTC3	ENST00000355666.5	0.00184275	0.033828	-1.00724	0.323407	6.23063	0.357096	0.0591642	0.097724	0.0151998	0.097724
NAPG	ENST00000583367.1	0.0018567	0.0339898	-1.00649	0.323396	4.43065	0.248773	0.107231	-0.0326267	0.049646	0.049646
ARAP2	ENST00000303965.9	0.00186396	0.0340944	-0.916092	0.29446	3.94828	0.259916	0.0379163	0.0921436	0.0874178	0.0921436
HLA-C	ENST00000376228.9	0.00187901	0.0343273	-3.47882	1.11905	1.27306	4.18596	0.603456	0.855724	1.27496	1.27496
DYNC1H1	ENST00000555800.2	0.00188685	0.0344065	-4.34881	1.39946	2.36288	5.85307	0.770158	2.16758	0.532494	2.16758
PLK1	ENST00000567897.6	0.0018926	0.0344658	-1.41866	0.456662	5.09259	0.555462	0.284035	-0.160468	0.0287749	0.0287749
VPS13A	ENST00000376636.7	0.00189368	0.0344756	-0.823562	0.265116	6.04483	0.266164	0.0366524	0.0687776	0.0164897	0.0687776
FOSL2	ENST00000379619.5	0.00190555	0.0346254	-3.62875	1.16884	2.96312	4.57748	1.35035	0.69894	0.291799	0.69894
EDNRB	ENST00000645696.1	0.0019071	0.034644	-2.78417	0.896867	2.67381	2.38022	0.727009	0.479546	0.394893	0.479546
CTDNEP1	ENST00000572043.5	0.00191847	0.0347934	-4.82947	1.5566	2.23602	8.37668	0.878238	2.75628	0.597286	2.75628
PMPCB	ENST00000249269.9	0.00194898	0.0352404	-0.587619	0.189683	4.9607	0.114612	0.0145168	0.0394527	0.0313727	0.0394527
SENP7	ENST00000394094.6	0.0019528	0.0352901	-3.57792	1.15517	2.66719	4.08173	1.60412	-0.304243	0.397493	0.397493
RBPMS	ENST00000519647.5	0.00196256	0.0354182	-2.5941	0.837929	3.38224	1.68014	0.879398	-0.602689	0.173791	0.173791
RNMT	ENST00000543302.6	0.00197152	0.0355217	-1.76205	0.569414	3.66623	1.0591	0.363009	0.0240478	0.123339	0.123339
CCDC88A	ENST00000645860.1	0.00199427	0.035834	-1.67835	0.542964	5.14928	0.805365	0.414435	-0.186006	0.0277806	0.0277806
TPR	ENST00000491783.5	0.00200052	0.0359171	-2.32912	0.753724	2.4808	1.79073	0.255393	0.596756	0.476633	0.596756
UAP1	ENST00000367926.8	0.00200456	0.0359798	-0.846875	0.274109	5.26497	0.194769	0.0867854	-0.0581838	0.0259181	0.0259181
IKZF3	ENST00000346872.8	0.00201149	0.0360749	-0.99765	0.323018	3.65177	0.342319	0.0310095	0.0654094	0.125501	0.125501
NEB	ENST00000413693.5	0.00203589	0.0364039	-0.800054	0.259341	4.36727	0.208978	0.0431843	0.0577026	0.0531948	0.0577026
HIPK1	ENST00000340480.8	0.00203734	0.0364102	-5.17663	1.67815	2.87071	8.27456	2.72001	1.50425	0.323369	1.50425
BIRC6	ENST00000421745.6	0.00203972	0.0364428	-0.636944	0.206506	7.99666	0.124054	0.00151413	0.0624528	0.00984474	0.0624528
MED6	ENST00000440435.2	0.00205208	0.0365846	-3.71307	1.20453	2.10047	3.78621	1.50434	0.0592558	0.672005	0.672005
CLEC2D	ENST00000479877.5	0.00207305	0.0368789	-3.34392	1.08584	1.58656	3.68239	0.33873	1.42985	1.01745	1.42985
LSM5	ENST00000409292.5	0.00207592	0.0369202	-2.11029	0.685348	5.21299	1.18697	0.677823	-0.278911	0.026731	0.026731
NME7	ENST00000524967.5	0.00207655	0.0369214	-0.841584	0.273325	4.04117	0.167216	0.0340319	0.00942289	0.078028	0.078028
APLP2	ENST00000278756.7	0.00209686	0.0371626	-0.902867	0.293505	7.74399	0.256583	0.0351941	0.0940233	0.0100172	0.0940233
NFE2L3	ENST00000607375.1	0.00210721	0.0372663	-4.10201	1.33412	2.16298	5.19243	0.295742	2.37408	0.636709	2.37408
MPHOSPH9	ENST00000541603.6	0.00211876	0.0373906	-0.753413	0.245167	4.23873	0.139675	0.0285689	0.0146254	0.0615914	0.0615914
MSANTD2	ENST00000526629.1	0.0021456	0.0377534	-1.52667	0.497399	3.28226	0.678596	0.173871	0.0659315	0.197238	0.197238
AKAP13	ENST00000558644.2	0.00214868	0.0377876	-1.19775	0.390289	3.94036	0.478408	0.140217	0.0306334	0.0882706	0.0882706
MAT2B	ENST00000321757.11	0.00215723	0.0379076	-0.625132	0.20378	5.7289	0.0913043	0.0427775	-0.0187417	0.0195118	0.0195118
VPS26A	ENST00000490696.5	0.0021698	0.0380651	-3.26777	1.06583	3.03853	2.85298	1.43687	-0.305975	0.267113	0.267113
NUBP2	ENST00000565987.5	0.00217654	0.0381456	-2.91464	0.950935	2.43395	3.2896	0.858114	0.293668	0.498303	0.498303
DOK5	ENST00000395939.5	0.00217714	0.0381461	-3.37068	1.09976	2.60075	4.26009	1.3898	-0.483759	0.42439	0.42439
USP43	ENST00000574408.5	0.00218124	0.0381876	-4.22508	1.37877	2.45227	5.69264	2.36178	-1.74919	0.489746	0.489746
MARK3	ENST00000556463.5	0.00219172	0.0383096	-1.46539	0.478427	3.16686	0.608941	0.115133	0.15724	0.228206	0.228206
VPS26A	ENST00000489794.1	0.00219825	0.0383838	-0.960964	0.31383	4.91542	0.317006	0.0342534	0.11348	0.032379	0.11348
SPATS2L	ENST00000409385.5	0.0022182	0.0385997	-4.72847	1.54558	1.74959	5.73096	2.68564	-0.65111	0.897603	0.897603
SLF1	ENST00000265140.10	0.00221789	0.0385997	-0.61772	0.20191	5.92321	0.160622	0.00521299	0.0559383	0.0175057	0.0559383
HDGFL3	ENST00000562702.2	0.00222014	0.0386234	-3.18498	1.04116	3.021	2.802	1.35326	-0.280204	0.272746	0.272746
IMPA1	ENST00000311489.8	0.00222927	0.03868	-0.668625	0.218658	4.75037	0.177618	0.0350079	0.0301684	0.0367091	0.0367091
TNFAIP8	ENST00000504771.3	0.00225217	0.0390062	-0.682929	0.22356	4.35083	0.145703	0.0207919	0.0506086	0.0541767	0.0541767
PUM1	ENST00000373747.7	0.00227277	0.039291	-0.851793	0.279088	6.54082	0.240309	0.0480701	0.0687651	0.0135138	0.0687651
SPATS2	ENST00000552918.5	0.00227713	0.0393252	-0.717577	0.235157	5.61967	0.141777	0.0620444	-0.00173839	0.0209037	0.0209037
DNAJA1	ENST00000465677.1	0.00228046	0.0393724	-2.67627	0.877163	1.94454	1.87542	0.387539	0.304111	0.766584	0.766584
CDCA2	ENST00000521098.2	0.00230143	0.0396517	-4.74975	1.55817	2.86497	7.28739	2.69528	0.946549	0.325364	0.946549
HNRNPC	ENST00000554969.5	0.00230467	0.0396663	-0.595471	0.195373	6.31611	0.104594	0.0425674	0.00665329	0.0146884	0.0146884
UQCC1	ENST00000374380.6	0.00235701	0.0402737	-3.42782	1.12716	1.38008	4.25869	0.722863	1.01582	1.18286	1.18286
KRIT1	ENST00000486261.5	0.00239547	0.0408045	-3.07265	1.01199	1.9479	2.75065	0.771748	0.307544	0.764445	0.764445
AC114801.3	ENST00000510231.1	0.00242365	0.0412101	-3.38711	1.11686	2.24646	5.60418	1.27927	-0.143277	0.591781	0.591781
BRD8	ENST00000425764.5	0.00246466	0.041768	-2.94998	0.974348	2.69668	2.50504	1.03801	-0.284779	0.38602	0.38602
HNRNPH1	ENST00000442819.6	0.00246633	0.0417856	-0.870399	0.287503	6.89596	0.261692	0.0719365	0.0520506	0.0119689	0.0520506
ROBO2	ENST00000470802.1	0.00248829	0.0420606	-0.891328	0.294677	3.80338	0.175428	0.0258338	0.00502852	0.104418	0.104418
PLEKHA5	ENST00000538714.5	0.00252566	0.0424454	-0.615004	0.203627	4.76451	0.117566	0.0222074	0.0399884	0.0362905	0.0399884
DPP10	ENST00000410059.5	0.00254678	0.0426678	-0.947118	0.313851	3.87015	0.312069	0.0515391	0.0618771	0.0962149	0.0962149
HNRNPU	ENST00000640001.1	0.00255389	0.0427652	-2.7392	0.907958	2.83477	2.35791	0.779792	0.456788	0.3359	0.456788
LRRC3B	ENST00000648296.1	0.00256124	0.0428017	-1.04122	0.345232	3.57885	0.369739	0.0418756	0.109368	0.136902	0.136902
CD6	ENST00000505761.2	0.00258202	0.0430727	-2.79542	0.927615	1.48469	2.01672	0.193611	0.537159	1.09709	1.09709
E2F5	ENST00000517476.5	0.00259306	0.0431838	-0.662612	0.219971	4.86181	0.120079	0.0389191	0.00228442	0.0336619	0.0336619
C14orf119	ENST00000319074.6	0.00259806	0.0432312	-0.601114	0.199594	6.5232	0.142764	0.00213564	0.0576211	0.0135991	0.0576211
NFYB	ENST00000550189.1	0.00259947	0.0432439	-0.748634	0.24859	4.55771	0.147288	0.0491043	0.00616371	0.0435915	0.0435915
AC139256.1	ENST00000569858.1	0.00261807	0.0434767	-0.63471	0.210913	5.1376	0.129859	0.00628361	0.0604425	0.0279805	0.0604425
OR5A1	ENST00000641045.1	0.00263447	0.0437053	-1.03548	0.344305	3.51707	0.217017	0.0305642	-0.00933991	0.147254	0.147254
SLC41A1	ENST00000468057.5	0.00266102	0.0440353	-0.89397	0.297553	5.83485	0.275843	0.114455	0.000273164	0.0183522	0.0183522
HNRNPU	ENST00000638716.1	0.00266465	0.0440624	-5.6134	1.86865	3.69369	9.85222	2.38102	2.85676	0.119321	2.85676
SMC4	ENST00000497984.5	0.00266386	0.0440624	-4.16199	1.38545	1.86563	6.35017	0.998054	1.88114	0.817945	1.88114
CCDC88A	ENST00000263630.13	0.0026686	0.0440946	-4.25444	1.41648	2.47923	7.42744	2.53226	0.299212	0.477346	0.477346
OSBPL2	ENST00000358053.3	0.0026685	0.0440946	-4.28442	1.42645	2.05647	4.34667	2.3544	-2.25473	0.697751	0.697751
SEC24C	ENST00000465076.5	0.00272627	0.0448235	-1.05023	0.350425	4.865	0.347435	0.14468	0.0395163	0.0335826	0.0395163
MGA	ENST00000564190.1	0.002751	0.045118	-0.647232	0.216157	4.87678	0.132888	0.0367927	-0.00104336	0.033293	0.033293
OPA1	ENST00000361908.8	0.00280233	0.0458123	-0.623698	0.20869	7.11325	0.144325	0.0238568	0.0414707	0.0112453	0.0414707
TSHR	ENST00000642209.1	0.0028184	0.0460068	-0.99942	0.334603	3.58494	0.237636	0.0320216	0.0313356	0.135918	0.135918
NCEH1	ENST00000475381.6	0.00282191	0.0460527	-4.96284	1.66176	1.95925	6.47264	3.38489	-0.978386	0.757264	0.757264
QKI	ENST00000544823.5	0.00282762	0.0461118	-0.698126	0.233809	5.34062	0.0993269	0.0572106	-0.046708	0.0247894	0.0247894
HSPA4	ENST00000615899.1	0.00283872	0.046213	-0.608763	0.203962	8.38959	0.176437	0.00105603	0.0613449	0.00991542	0.0613449
CD27	ENST00000266557.3	0.00284947	0.0463209	-3.50238	1.17391	1.46394	4.79263	0.197106	1.86998	1.11378	1.86998
NAP1L1	ENST00000535020.6	0.00285095	0.0463209	-0.595065	0.199461	5.45476	0.111702	0.0299368	0.0297401	0.0231695	0.0297401
ZFYVE19	ENST00000570108.5	0.00285007	0.0463209	-4.03822	1.35353	1.69192	3.54158	1.80913	-1.56559	0.938948	0.938948
ECE1	ENST00000526194.5	0.00284918	0.0463209	-3.09882	1.03863	1.47331	2.99368	0.511919	1.05203	1.10622	1.10622
TRIM25	ENST00000572550.1	0.00285359	0.0463524	-3.78914	1.27021	1.33661	4.10143	1.20042	0.624809	1.21973	1.21973
SNX3	ENST00000426155.6	0.00286017	0.0464365	-3.50157	1.17408	1.97896	7.31201	1.3228	0.0116995	0.744907	0.744907
CERT1	ENST00000644445.1	0.00289219	0.0467842	-0.739001	0.248073	5.73324	0.214469	0.0728491	0.0138204	0.0194609	0.0194609
POGZ	ENST00000485040.5	0.00290377	0.0469142	-0.998517	0.335326	3.7094	0.222279	0.0515896	-0.00448804	0.117076	0.117076
HBP1	ENST00000463202.5	0.00291323	0.0470211	-1.22061	0.410049	3.30594	0.322592	0.0608152	-0.00317199	0.191396	0.191396
HBP1	ENST00000640401.1	0.00291323	0.0470211	-1.22061	0.410049	3.30594	0.322592	0.0608152	-0.00317199	0.191396	0.191396
NCBP2	ENST00000427641.2	0.0029229	0.0471176	-0.737561	0.247859	5.42551	0.180887	0.051595	0.0405559	0.0235778	0.0405559
CD52	ENST00000374213.3	0.00292349	0.0471176	-2.68351	0.901816	3.42042	4.62457	0.0410645	1.17884	0.165687	1.17884
PAM	ENST00000515456.5	0.00295688	0.047499	-3.67418	1.23619	1.8248	4.27274	1.31848	0.973763	0.845421	0.973763
TCERG1	ENST00000394421.6	0.0029572	0.047499	-0.671423	0.225905	7.16435	0.146943	0.00431832	0.0722311	0.0110995	0.0722311
PCED1B	ENST00000546455.6	0.00297283	0.0476921	-2.98654	1.00539	1.8692	6.50272	0.234229	1.28198	0.815569	1.28198
MORF4L1	ENST00000558830.5	0.00298037	0.0477873	-0.592076	0.199368	6.46048	0.115266	0.0171842	0.0424374	0.0139109	0.0424374
SLC38A2	ENST00000256689.10	0.00301174	0.0481412	-0.714482	0.240847	9.39289	0.161133	0.00093239	0.0860785	0.0121622	0.0860785
XRCC6	ENST00000359308.8	0.00303685	0.0484257	-0.640601	0.216129	5.17145	0.132606	0.0328769	0.0371904	0.0274079	0.0371904
PKIA	ENST00000352966.9	0.00304436	0.0485134	-0.650617	0.219564	4.76552	0.104513	0.0360517	-0.0027013	0.0362608	0.0362608
RSKR	ENST00000494272.6	0.00307325	0.0488648	-1.63493	0.552284	3.098	0.870274	0.170412	0.287115	0.248545	0.287115
HIF1A	ENST00000557538.5	0.00308066	0.0489591	-3.27387	1.1062	3.97336	9.79241	1.71568	0.119829	0.0847699	0.119829
KIF13A	ENST00000378814.9	0.0030945	0.0491083	-0.623563	0.210792	6.56796	0.167145	0.0178822	0.0487678	0.0133842	0.0487678
UBE2D3	ENST00000508474.5	0.00311174	0.0492579	-0.997336	0.337339	3.64545	0.300027	0.0442406	0.0232703	0.126456	0.126456
FSCN1	ENST00000473330.1	0.00311361	0.0492579	-3.22138	1.08967	3.31227	3.2845	1.25219	0.528882	0.189865	0.528882
LRRC49	ENST00000260382.9	0.00312738	0.0494403	-0.842431	0.285093	5.39348	0.225511	0.0978878	0.0200236	0.0240296	0.0240296
TXNRD3	ENST00000524230.7	0.00313364	0.0495174	-3.2806	1.11044	1.69861	3.4613	0.91553	-0.685134	0.934093	0.934093
RPL21	ENST00000461690.5	0.00314472	0.0496314	-0.799647	0.270771	6.29257	0.273443	0.0951503	-0.00670958	0.0148249	0.0148249
TSSC2	ENST00000530366.5	0.00315034	0.0496963	-2.0396	0.690763	2.96108	1.17177	0.423246	0.0529592	0.292484	0.292484

## Sheet: iPSC, WT v RNF20 Het1, WT down
ext_gene	target_id	pval	qval	b	se_b	mean_obs	var_obs	tech_var	sigma_sq	smooth_sigma_sq	final_sigma_sq
MID1IP1	ENST00000336949.6	3.52344e-55	1.16555e-50	7.478	0.477942	4.27708	13.9254	0.283733	-0.244375	0.0589099	0.0589099
KHSRP	ENST00000619396.4	8.01419e-45	1.76739e-40	7.99432	0.569104	4.58978	15.7929	0.443547	-0.322873	0.0422721	0.0422721
RPL13	ENST00000565571.5	1.99653e-35	3.30227e-31	1.04872	0.0844277	8.07274	0.317747	0.000865767	0.00578791	0.00982629	0.00982629
TPT1	ENST00000527226.2	2.80785e-32	3.71535e-28	1.48221	0.125317	6.73835	0.590807	0.0109499	0.00499104	0.0126067	0.0126067
FTH1	ENST00000530019.5	3.00329e-31	3.31163e-27	1.46281	0.125811	7.91196	0.637927	0.0138591	0.00305108	0.00988342	0.00988342
CALM1	ENST00000553995.5	6.51829e-28	6.16072e-24	6.60225	0.602849	3.62744	10.5343	0.415927	-0.385548	0.129213	0.129213
KLF11	ENST00000305883.6	6.95121e-27	5.10991e-23	5.87344	0.547116	3.15398	8.62205	0.217097	0.168103	0.231908	0.231908
HMGA1	ENST00000401473.7	5.13145e-26	3.39497e-22	1.07415	0.101824	8.82279	0.39916	0.00506436	-0.000600118	0.0104878	0.0104878
UBE2D2	ENST00000505007.5	3.51906e-24	1.79093e-20	1.70651	0.168226	5.49625	0.627333	0.0198547	-0.00477098	0.0225955	0.0225955
CNOT9	ENST00000418808.1	2.50606e-23	1.10534e-19	5.29743	0.532372	2.83812	7.04533	0.0904025	-0.0490163	0.334728	0.334728
GRSF1	ENST00000505068.5	2.16837e-20	8.43879e-17	1.45525	0.157261	5.99671	0.441568	0.0202236	0.0073136	0.016873	0.016873
CHPF	ENST00000243776.11	5.37022e-19	1.97385e-15	0.808632	0.0908132	7.5967	0.13881	0.00217214	0.00753155	0.0101984	0.0101984
RPL8	ENST00000394920.6	5.87165e-19	2.04457e-15	0.861981	0.0969124	9.01727	0.244463	0.00315792	0.00820835	0.0109301	0.0109301
UTF1	ENST00000304477.3	7.75423e-18	2.33191e-14	1.27183	0.147833	6.73714	0.439623	0.00154297	0.0312389	0.012612	0.0312389
AK4	ENST00000497030.5	3.64788e-17	1.0056e-13	5.50014	0.652936	2.84863	7.30111	0.308433	-0.0169158	0.331056	0.331056
TPT1	ENST00000442760.2	3.28426e-16	7.76024e-13	0.811659	0.0994388	6.80463	0.212574	0.00250589	0.00831495	0.0123262	0.0123262
PCBP2	ENST00000359282.9	4.63888e-16	1.05831e-12	0.835297	0.102862	7.64656	0.159397	0.00574045	-0.00146894	0.0101303	0.0101303
ROBO1	ENST00000498428.5	3.30781e-15	6.83889e-12	5.94177	0.754155	3.17257	8.65318	0.626544	-0.317287	0.22658	0.22658
MAZ	ENST00000219782.10	4.79901e-15	9.0715e-12	0.758668	0.0968668	7.81576	0.133917	0.00412407	0.00749512	0.0099507	0.0099507
RAB10	ENST00000495146.5	9.53719e-15	1.75272e-11	1.45538	0.187905	5.94938	0.517674	0.0356891	0.00248075	0.0172735	0.0172735
PPDPF	ENST00000370179.8	1.75401e-14	2.97552e-11	0.65821	0.0858443	7.48347	0.0950226	0.00067422	0.00201696	0.0103797	0.0103797
H1-10	ENST00000333762.6	3.14744e-14	5.20587e-11	0.78863	0.103875	8.57704	0.18859	0.000238282	0.0159467	0.0100968	0.0159467
RBPMS	ENST00000339877.8	3.87401e-14	6.25133e-11	0.63761	0.0842824	7.95756	0.0849954	0.000795073	0.00491525	0.00986022	0.00986022
PCOLCE	ENST00000223061.6	4.74574e-14	7.47566e-11	0.690818	0.0916359	7.08801	0.148297	0.00127502	0.0105565	0.0113207	0.0113207
TNFRSF12A	ENST00000326577.8	7.14184e-14	1.09885e-10	1.21969	0.162946	6.28334	0.344005	0.0192359	0.020591	0.0148793	0.020591
SHKBP1	ENST00000291842.10	8.97428e-14	1.31942e-10	0.71537	0.0959561	7.1061	0.108946	0.00254488	0.000288477	0.0112665	0.0112665
TMUB1	ENST00000297533.9	9.78903e-14	1.37796e-10	0.928309	0.12471	6.16109	0.218346	0.00767818	0.00137409	0.0156508	0.0156508
PTPRZ1	ENST00000471837.1	1.66524e-13	2.20345e-10	4.84451	0.657039	2.48917	5.86099	0.174716	0.0395204	0.472835	0.472835
TCP1	ENST00000543532.5	2.84359e-13	3.54966e-10	1.08554	0.148672	5.65052	0.284352	0.0126668	0.0173706	0.0204882	0.0204882
MRPS34	ENST00000397375.6	3.00971e-13	3.62041e-10	0.679931	0.0932183	7.34562	0.129294	0.00238293	0.0017627	0.0106515	0.0106515
PAIP1	ENST00000504639.5	3.69608e-13	4.36665e-10	5.69793	0.784164	3.22461	8.70581	0.71017	-0.645404	0.2122	0.2122
CRTC1	ENST00000594658.5	4.30212e-13	4.99348e-10	1.09871	0.151636	5.81919	0.276935	0.0146834	0.0198069	0.0185132	0.0198069
SOX13	ENST00000367204.6	5.93021e-13	6.64988e-10	1.05695	0.146757	7.69155	0.246375	0.0041843	0.028122	0.0100748	0.028122
NME2	ENST00000512737.5	6.19845e-13	6.72277e-10	0.633636	0.0880534	8.11948	0.120133	0.00180753	0.00771044	0.00982258	0.00982258
SCAP	ENST00000545718.2	6.1514e-13	6.72277e-10	6.2458	0.867824	3.4786	9.89517	0.975442	-0.834606	0.154235	0.154235
ZSCAN10	ENST00000576985.6	6.7793e-13	7.23417e-10	0.817888	0.113852	8.00679	0.14407	0.00118509	0.0182582	0.0098414	0.0182582
RPS3	ENST00000530721.5	8.19354e-13	8.60452e-10	0.685614	0.0957845	8.58846	0.121348	0.00180842	0.0119536	0.010111	0.0119536
C1QBP	ENST00000225698.8	1.4908e-12	1.47211e-09	0.651189	0.0920363	7.79634	0.11322	0.00167567	0.0110304	0.00996732	0.0110304
TTYH3	ENST00000258796.12	1.53283e-12	1.49136e-09	0.806599	0.114064	8.49523	0.180084	0.00332698	0.0161888	0.0100056	0.0161888
CYBA	ENST00000261623.8	1.75597e-12	1.6837e-09	0.623748	0.0884422	7.22384	0.101956	0.000792288	0.00975335	0.0109407	0.0109407
SART3	ENST00000546728.5	2.49865e-12	2.29599e-09	6.55906	0.936557	4.13612	10.4652	1.24615	-1.13724	0.0695576	0.0695576
RNF138	ENST00000585103.5	2.59824e-12	2.32296e-09	5.36574	0.766764	2.94044	7.48558	0.582453	-0.511045	0.299436	0.299436
ATP11A	ENST00000419631.1	2.91414e-12	2.53683e-09	5.19735	0.744414	2.96783	7.61611	0.541003	-0.524748	0.290226	0.290226
MIDN	ENST00000591446.6	3.11077e-12	2.67283e-09	1.3165	0.18881	7.03004	0.469647	0.0419715	0.00456164	0.0115022	0.0115022
SSNA1	ENST00000459860.1	3.79075e-12	3.17464e-09	0.916332	0.131946	5.90182	0.196856	0.00841286	0.0110375	0.0177016	0.0177016
H2AX	ENST00000375167.1	4.78255e-12	3.95517e-09	1.32037	0.191028	5.759	0.412658	0.0355729	-0.00989313	0.0191648	0.0191648
SPSB4	ENST00000310546.3	5.02714e-12	4.05604e-09	0.96084	0.139155	5.70225	0.233921	0.0092146	0.00805204	0.0198316	0.0198316
FBRSL1	ENST00000650108.1	5.3259e-12	4.24532e-09	0.661782	0.0959576	7.02452	0.0917937	0.0022917	0.00703213	0.0115201	0.0115201
PCDH1	ENST00000394536.4	6.37906e-12	4.96516e-09	0.857446	0.124793	7.91387	0.170587	0.00327969	0.0200804	0.00988234	0.0200804
ZNF358	ENST00000597229.2	7.51533e-12	5.7151e-09	0.674561	0.0985121	6.72188	0.123061	0.00187768	-0.00124594	0.0126793	0.0126793
PTMS	ENST00000309083.7	1.51359e-11	1.06531e-08	1.15069	0.170558	7.17978	0.376179	0.0325781	-0.0087251	0.0110572	0.0110572
RHBDF1	ENST00000262316.10	1.68154e-11	1.15886e-08	0.925121	0.137436	6.21592	0.217279	0.0130405	0.0117725	0.0152924	0.0152924
SALL2	ENST00000537235.2	1.74101e-11	1.18747e-08	0.606145	0.0901165	8.63062	0.0940149	0.00201461	0.00210443	0.0101669	0.0101669
MED25	ENST00000312865.10	1.80168e-11	1.21632e-08	0.70675	0.105151	6.71201	0.106931	0.00386201	0.00363633	0.0127232	0.0127232
IGSF8	ENST00000314485.12	2.28686e-11	1.4548e-08	1.04138	0.155746	7.37051	0.327423	0.025787	-0.0020613	0.0105982	0.0105982
REEP4	ENST00000306306.8	2.26753e-11	1.4548e-08	0.726905	0.108693	6.23842	0.13075	0.00257006	0.0132313	0.0151513	0.0151513
PLPPR3	ENST00000520876.7	2.46699e-11	1.55444e-08	0.633569	0.0949122	6.82219	0.0884011	0.00125757	0.0041574	0.0122549	0.0122549
GNB2	ENST00000303210.9	2.70867e-11	1.67482e-08	0.635483	0.0953949	7.6241	0.0810238	0.00349018	0.000432351	0.0101601	0.0101601
CD276	ENST00000318443.10	2.76978e-11	1.68118e-08	0.758679	0.113945	7.6724	0.141288	0.00593015	0.0135449	0.0100977	0.0135449
QPRT	ENST00000449759.1	3.38412e-11	2.01706e-08	1.09121	0.164616	5.22438	0.329852	0.0140981	-0.00133942	0.0265498	0.0265498
H3P6	ENST00000369387.4	4.2764e-11	2.52613e-08	6.1177	0.927743	4.74976	11.0073	1.05988	0.23118	0.0367273	0.23118
NA	ENST00000348624.5	4.3545e-11	2.5495e-08	0.929306	0.140986	5.69256	0.179517	0.0098646	0.00749016	0.0199509	0.0199509
ITGA3	ENST00000320031.13	4.47166e-11	2.59341e-08	0.617089	0.0936752	7.0061	0.081552	0.00158193	0.00989282	0.0115806	0.0115806
MAD2L2	ENST00000376667.7	4.63711e-11	2.64475e-08	0.851723	0.129399	6.20537	0.153158	0.00975644	0.0106285	0.0153597	0.0153597
GALNT17	ENST00000333538.10	6.7612e-11	3.69687e-08	0.614822	0.0942132	7.44261	0.157339	0.00285992	0.003077	0.0104543	0.0104543
RBPMS2	ENST00000300069.5	7.32882e-11	3.91227e-08	0.614554	0.0943469	8.51601	0.0891633	0.00137125	0.0119808	0.010027	0.0119808
SEMA6B	ENST00000586582.6	7.92307e-11	4.19352e-08	0.73026	0.112312	7.44193	0.141771	0.00138303	0.017538	0.0104556	0.017538
HNRNPDL	ENST00000502762.4	8.5254e-11	4.44126e-08	1.20759	0.18604	5.60921	0.394715	0.0308696	0.000288274	0.021047	0.021047
ZNF580	ENST00000325333.10	9.31049e-11	4.77505e-08	0.833644	0.128694	5.98405	0.195546	0.00786534	0.00568589	0.0169777	0.0169777
H4C11	ENST00000355057.2	1.00216e-10	5.06061e-08	0.906887	0.140241	5.41994	0.250859	0.00584544	0.0210988	0.0236559	0.0236559
TMEM160	ENST00000253047.7	1.48473e-10	7.26917e-08	0.726022	0.113318	6.03276	0.114628	0.00267784	0.00443055	0.0165837	0.0165837
PAWR	ENST00000548426.1	1.61823e-10	7.81477e-08	1.25401	0.196129	4.99475	0.487213	0.0270417	0.0109327	0.0306581	0.0306581
ZNF787	ENST00000610935.2	1.80205e-10	8.6394e-08	0.597989	0.093768	6.86966	0.0827289	0.00112024	0.0118152	0.0120684	0.0120684
KNDC1	ENST00000304613.8	2.20881e-10	1.01509e-07	0.722992	0.113927	6.24025	0.20531	0.00432919	0.0102865	0.01514	0.01514
MPP1	ENST00000413259.7	2.20939e-10	1.01509e-07	4.60899	0.726279	2.25069	4.99555	0.201662	-0.0779017	0.58956	0.58956
SLC6A9	ENST00000372310.7	2.33348e-10	1.05023e-07	0.853444	0.134663	6.52062	0.207369	0.00365143	0.0235499	0.0136117	0.0235499
ERI1	ENST00000522258.1	2.50275e-10	1.11129e-07	0.801029	0.126609	6.54128	0.138987	0.0017546	0.02229	0.0135116	0.02229
PRKCZ	ENST00000378567.8	3.52781e-10	1.556e-07	0.651542	0.103855	6.88549	0.111219	0.00417048	0.00888539	0.0120082	0.0120082
KHSRP	ENST00000595223.5	4.12454e-10	1.77195e-07	2.09036	0.334498	4.98187	1.17776	0.136909	0.0299989	0.0309244	0.0309244
ACTG1	ENST00000570382.1	4.42057e-10	1.87478e-07	6.2835	1.00723	3.45216	10.6522	1.36246	-0.0514854	0.159304	0.159304
DGKZ	ENST00000456247.6	5.10623e-10	2.09831e-07	0.762861	0.122729	7.03145	0.121122	0.0110961	-0.000625667	0.0114976	0.0114976
SALL3	ENST00000614625.1	6.0159e-10	2.3551e-07	0.873068	0.141045	5.85273	0.303902	0.00676928	0.0230711	0.0181728	0.0230711
GSPT1	ENST00000439887.6	6.4638e-10	2.51556e-07	0.845879	0.136903	7.15006	0.164353	0.00538029	0.0227332	0.0111394	0.0227332
CTDNEP1	ENST00000318988.10	6.59201e-10	2.55045e-07	0.679617	0.110049	6.89271	0.139578	0.00618518	0.00151235	0.011981	0.011981
SIX4	ENST00000556952.3	6.92616e-10	2.64875e-07	0.958298	0.155372	5.39559	0.198962	0.012211	0.0152309	0.0239997	0.0239997
ZC3H3	ENST00000262577.6	7.18775e-10	2.733e-07	0.606613	0.0984458	6.80399	0.0738321	0.00220853	0.00231647	0.0123288	0.0123288
OPLAH	ENST00000618853.5	8.00183e-10	3.02515e-07	0.807154	0.131354	6.13738	0.206224	0.0029201	0.0229606	0.0158128	0.0229606
FAAP20	ENST00000378546.9	9.35849e-10	3.47841e-07	0.786568	0.128525	5.88202	0.153196	0.00688997	0.00191733	0.0178879	0.0178879
OTX2	ENST00000408990.7	9.49909e-10	3.51095e-07	0.839901	0.137292	5.71346	0.274636	0.00857816	0.0083321	0.0196957	0.0196957
NAT14	ENST00000205194.5	9.88499e-10	3.63328e-07	0.623443	0.102015	6.56871	0.104859	0.00223011	-2.07846e-05	0.0133806	0.0133806
ADGRL1	ENST00000361434.7	1.64359e-09	5.72317e-07	0.798989	0.132511	7.78105	0.169515	0.00158625	0.0247525	0.00998113	0.0247525
RNF126	ENST00000292363.10	1.81408e-09	6.25103e-07	0.616614	0.102536	7.05166	0.0835603	0.00199262	0.0137778	0.0114331	0.0137778
AGPAT2	ENST00000371696.7	2.04742e-09	6.80689e-07	0.700365	0.116844	6.20608	0.0946726	0.0051238	-0.00257782	0.0153551	0.0153551
FAM83F	ENST00000473717.1	2.34122e-09	7.70622e-07	0.852364	0.142723	5.43186	0.154757	0.00706583	0.0124374	0.0234888	0.0234888
VARS1	ENST00000435657.6	2.48549e-09	7.98252e-07	0.86505	0.145084	6.74882	0.190444	0.0190129	-0.00283064	0.0125612	0.0125612
VARS1	ENST00000422694.6	2.48549e-09	7.98252e-07	0.86505	0.145084	6.74882	0.190444	0.0190129	-0.00283064	0.0125612	0.0125612
MFSD3	ENST00000301327.5	2.59058e-09	8.24004e-07	0.673504	0.113087	6.06177	0.0993024	0.00282286	0.00630017	0.01636	0.01636
AC243919.1	ENST00000466501.1	3.08821e-09	9.59229e-07	0.607764	0.102544	7.56567	0.142756	0.00552861	0.00377692	0.0102444	0.0102444
AC011295.1	ENST00000631659.1	3.08821e-09	9.59229e-07	0.607764	0.102544	7.56567	0.142756	0.00552861	0.00377692	0.0102444	0.0102444
TMEM161A	ENST00000162044.13	3.26124e-09	9.94301e-07	0.684487	0.115664	6.3057	0.106249	0.00531896	0.0126549	0.0147484	0.0147484
HPN	ENST00000392226.5	3.55879e-09	1.06538e-06	0.962793	0.163089	5.72112	0.338564	0.020293	0.0116231	0.0196039	0.0196039
RND1	ENST00000309739.6	3.74067e-09	1.10979e-06	0.906139	0.153706	5.705	0.278651	0.00415295	0.0312854	0.0197981	0.0312854
WAPL	ENST00000298767.10	3.93732e-09	1.16077e-06	0.664526	0.112884	7.85968	0.131897	0.00919729	0.00911976	0.00991689	0.00991689
TAX1BP1	ENST00000433216.6	3.96774e-09	1.16153e-06	5.51702	0.937387	3.45266	7.71108	1.15883	-0.863432	0.159207	0.159207
TPCN2	ENST00000294309.8	4.03222e-09	1.17005e-06	0.643662	0.109413	6.39245	0.0866888	0.00369132	0.00362896	0.0142655	0.0142655
ROR1	ENST00000371079.6	4.02199e-09	1.17005e-06	0.829227	0.140946	7.50607	0.249707	0.0129555	0.0168432	0.0103405	0.0168432
FBLL1	ENST00000338333.4	4.12106e-09	1.19061e-06	0.962539	0.163718	5.03906	0.234364	0.00731165	0.0328936	0.0297761	0.0328936
TP53I13	ENST00000301057.8	4.22929e-09	1.20608e-06	0.801114	0.136361	5.69736	0.17826	0.0047883	0.023103	0.0198916	0.023103
RECQL5	ENST00000317905.10	5.43655e-09	1.53056e-06	0.669042	0.114695	6.38113	0.110089	0.00348208	0.0162503	0.0143264	0.0162503
PTMA	ENST00000409683.5	5.84929e-09	1.63978e-06	3.3173	0.569884	6.60611	2.76179	0.473946	-0.344534	0.0132051	0.0132051
AGTRAP	ENST00000314340.10	5.95799e-09	1.65622e-06	0.942753	0.162043	6.05729	0.217589	0.0189777	0.020409	0.0163941	0.020409
HDAC7	ENST00000080059.12	6.10205e-09	1.68917e-06	0.750992	0.129171	7.51148	0.127132	0.00475553	0.0202722	0.0103314	0.0202722
YPEL3	ENST00000398838.8	6.32576e-09	1.7438e-06	0.784938	0.13515	5.72038	0.150348	0.0077854	0.0168435	0.0196128	0.0196128
VENTX	ENST00000325980.10	6.48873e-09	1.78131e-06	0.739879	0.127485	5.64614	0.126788	0.0038327	0.00756694	0.020546	0.020546
PRSS8	ENST00000317508.11	6.72569e-09	1.83116e-06	0.645744	0.111381	7.62803	0.102184	0.000549202	0.0180593	0.0101548	0.0180593
RASIP1	ENST00000222145.9	6.81813e-09	1.84856e-06	0.820872	0.141643	5.46462	0.128592	0.00706179	-0.00407926	0.0230325	0.0230325
RPL13P12	ENST00000392730.2	7.18831e-09	1.90995e-06	0.594323	0.102709	6.4462	0.102913	0.00184003	0.00352293	0.0139837	0.0139837
RENBP	ENST00000393700.8	7.34208e-09	1.94301e-06	1.03076	0.178243	4.9287	0.242353	0.0155791	0.00656207	0.0320769	0.0320769
AC073896.1	ENST00000548360.1	7.61856e-09	1.98114e-06	0.976118	0.168975	5.63443	0.309654	0.0221264	0.000288798	0.0207026	0.0207026
PUM1	ENST00000426105.6	8.13357e-09	2.10202e-06	6.22473	1.07962	3.39915	9.59779	1.57822	-1.34643	0.170143	0.170143
GMDS	ENST00000380815.5	8.34655e-09	2.13208e-06	0.672015	0.116643	6.70687	0.110278	0.00766207	0.00853063	0.0127462	0.0127462
RFNG	ENST00000310496.9	8.5232e-09	2.16883e-06	0.827569	0.143731	5.85106	0.157507	0.0105526	0.0204352	0.0181893	0.0204352
ALDH2	ENST00000548536.1	9.276e-09	2.33622e-06	0.837465	0.145812	6.42074	0.220806	0.017776	-9.5153e-05	0.0141157	0.0141157
NECTIN2	ENST00000252485.8	9.28698e-09	2.33622e-06	0.592659	0.103192	7.12803	0.0782323	0.00301007	0.0129628	0.0112023	0.0129628
ZNF865	ENST00000568956.1	1.01048e-08	2.51328e-06	0.591421	0.103233	6.4179	0.0791322	0.00185516	0.0121287	0.0141306	0.0141306
PGAP6	ENST00000250930.7	1.02054e-08	2.52879e-06	0.589263	0.102887	6.92312	0.0891925	0.00400969	-0.000540327	0.0118689	0.0118689
LPCAT4	ENST00000314891.11	1.08258e-08	2.65273e-06	0.682853	0.119437	6.51939	0.0981957	0.00778015	0.00601343	0.0136177	0.0136177
TRAPPC12	ENST00000324266.10	1.11713e-08	2.72729e-06	0.65618	0.114879	6.50715	0.0930171	0.00611817	0.007546	0.0136777	0.0136777
ARHGEF10	ENST00000521927.1	1.18727e-08	2.82554e-06	4.40133	0.771954	2.13551	4.5591	0.241839	-0.189103	0.65203	0.65203
ARHGEF10	ENST00000631992.1	1.18727e-08	2.82554e-06	4.40133	0.771954	2.13551	4.5591	0.241839	-0.189103	0.65203	0.65203
EPHX1	ENST00000272167.9	1.19932e-08	2.84398e-06	0.776453	0.136224	7.20892	0.136147	0.00698835	0.0208471	0.0109794	0.0208471
RNPS1	ENST00000566397.5	1.23357e-08	2.90437e-06	0.905641	0.159023	7.668	0.207532	0.00968778	0.0282448	0.0101031	0.0282448
SLC39A3	ENST00000269740.9	1.33925e-08	3.10998e-06	0.724949	0.12761	5.87427	0.112184	0.0064642	0.00586624	0.0179622	0.0179622
MIER2	ENST00000619835.4	1.41274e-08	3.25669e-06	0.723835	0.127619	5.9428	0.171009	0.00431527	0.0201147	0.0173312	0.0201147
N4BP3	ENST00000274605.6	1.46208e-08	3.34709e-06	0.586385	0.103493	7.78678	0.0787896	0.00046347	0.0156026	0.00997588	0.0156026
RNF166	ENST00000312838.8	1.56219e-08	3.51546e-06	0.771715	0.136476	5.97099	0.120783	0.0108509	0.000823145	0.0170876	0.0170876
NPDC1	ENST00000371601.5	1.56764e-08	3.51576e-06	0.72758	0.128684	5.92244	0.166875	0.00732677	0.000174676	0.0175127	0.0175127
GPRC5B	ENST00000569479.5	1.7379e-08	3.84546e-06	0.659196	0.116956	7.29674	0.134594	0.00523966	0.0152786	0.0107619	0.0152786
AUTS2	ENST00000647140.1	1.80606e-08	3.94352e-06	1.50908	0.26806	5.58718	0.628029	0.0572151	0.0505693	0.0213488	0.0505693
TSC22D4	ENST00000300181.7	1.80445e-08	3.94352e-06	0.592188	0.105189	6.52021	0.0744026	0.00298326	0.00693105	0.0136137	0.0136137
PRRC2B	ENST00000651665.1	1.86577e-08	4.04719e-06	0.842156	0.149743	6.99234	0.166125	0.0220078	-0.00363951	0.0116267	0.0116267
CBX7	ENST00000216133.10	1.88759e-08	4.08115e-06	0.649397	0.11551	5.9722	0.0931516	0.00293646	0.0123273	0.0170774	0.0170774
SINHCAF	ENST00000454658.6	1.91478e-08	4.09975e-06	1.96068	0.348905	4.9791	1.02111	0.130245	0.0523571	0.0309823	0.0523571
SINHCAF	ENST00000633702.1	1.91478e-08	4.09975e-06	1.96068	0.348905	4.9791	1.02111	0.130245	0.0523571	0.0309823	0.0523571
OBSL1	ENST00000373873.8	2.3517e-08	4.92369e-06	0.850622	0.152334	6.51898	0.166238	0.0129334	0.0218753	0.0136197	0.0218753
NUDT21	ENST00000567110.1	2.3691e-08	4.92891e-06	1.65027	0.295608	5.31996	0.657291	0.041669	0.0894071	0.0250922	0.0894071
SEMA6A	ENST00000515129.5	2.51358e-08	5.15707e-06	1.31447	0.235892	6.63002	0.406154	0.0142224	0.0692449	0.0130945	0.0692449
KMT5C	ENST00000255613.8	2.87772e-08	5.76939e-06	0.685087	0.123468	6.00459	0.137105	0.00605775	0.0108911	0.0168086	0.0168086
PROSER2	ENST00000379200.1	2.96376e-08	5.88836e-06	4.58489	0.827065	2.05793	4.64945	0.329166	-0.0162223	0.696888	0.696888
EIF3F	ENST00000528653.1	3.04504e-08	5.99584e-06	0.725453	0.130976	5.60222	0.137137	0.0045892	0.00436315	0.0211428	0.0211428
NA	ENST00000626931.1	3.04504e-08	5.99584e-06	0.725453	0.130976	5.60222	0.137137	0.0045892	0.00436315	0.0211428	0.0211428
NPIPB5	ENST00000517539.5	3.16275e-08	6.1725e-06	5.85971	1.05921	3.55312	9.48655	1.54175	-1.30336	0.141123	0.141123
RMND5B	ENST00000507457.5	3.29166e-08	6.38641e-06	1.40143	0.253645	4.2836	0.457367	0.0380342	0.0071137	0.0584694	0.0584694
SLC2A8	ENST00000373371.7	3.34457e-08	6.47009e-06	0.979081	0.177294	5.57532	0.205282	0.0256384	-0.0152688	0.0215111	0.0215111
TBC1D22A	ENST00000394449.6	3.80451e-08	7.27475e-06	5.36911	0.976257	2.84749	7.04677	1.09816	-0.961841	0.331455	0.331455
COX5A	ENST00000568783.5	3.97659e-08	7.52199e-06	0.959872	0.17478	5.21088	0.231534	0.0190572	0.0143051	0.0267648	0.0267648
CDK16	ENST00000357227.9	4.01329e-08	7.56466e-06	1.18954	0.216663	6.70257	0.448887	0.057649	-0.0236962	0.0127655	0.0127655
CBR1	ENST00000466328.2	4.34175e-08	8.11441e-06	1.15585	0.211061	4.71895	0.354865	0.0291436	0.0250192	0.0376765	0.0376765
MYL6B	ENST00000552568.5	4.50273e-08	8.31649e-06	0.745249	0.136245	5.88254	0.185871	0.00996123	0.00276601	0.0178829	0.0178829
LUC7L	ENST00000629543.2	4.51272e-08	8.31649e-06	6.052	1.1065	2.92898	8.07114	1.53318	-0.993906	0.303324	0.303324
ZNF398	ENST00000475153.5	4.57711e-08	8.38842e-06	0.963409	0.176223	6.08747	0.228273	0.00880448	0.0377771	0.0161685	0.0377771
CD24	ENST00000619133.4	4.84218e-08	8.80107e-06	0.882437	0.161707	6.11526	0.311209	0.0232559	-0.0114397	0.0159679	0.0159679
RTEL1	ENST00000360203.10	4.8694e-08	8.82628e-06	0.7002	0.128335	6.4731	0.121111	0.0108579	0.0137025	0.013847	0.013847
GATD3B	ENST00000620528.4	4.88756e-08	8.83501e-06	0.820732	0.150445	6.44611	0.171242	0.0199665	-0.00914699	0.0139842	0.0139842
UQCRFS1P1	ENST00000435169.1	4.92244e-08	8.8738e-06	0.72123	0.132237	5.63479	0.1139	0.00553207	-0.00237975	0.0206977	0.0206977
RBM38	ENST00000356208.10	5.11129e-08	9.11491e-06	0.618563	0.113552	7.09546	0.0856138	0.00804288	0.01045	0.0112982	0.0112982
CGAS	ENST00000370315.4	5.20273e-08	9.22822e-06	0.697912	0.128193	5.62093	0.117146	0.00376378	0.0144528	0.0208863	0.0208863
PCSK1N	ENST00000218230.6	5.39762e-08	9.52283e-06	0.87442	0.160807	4.97494	0.171354	0.00771882	0.0031704	0.0310697	0.0310697
ATF2	ENST00000428760.5	5.41327e-08	9.52505e-06	5.91963	1.08873	3.26189	8.21574	1.5756	-1.13947	0.202406	0.202406
RHOA	ENST00000431929.2	5.67948e-08	9.88827e-06	0.992251	0.182782	4.80542	0.261662	0.0149799	-0.0108009	0.0351339	0.0351339
MTHFD1L	ENST00000611279.4	5.7257e-08	9.94258e-06	5.90509	1.08806	4.05822	8.76815	1.69939	-1.02223	0.0764245	0.0764245
ATRAID	ENST00000380171.7	5.83935e-08	1.0087e-05	0.75452	0.139117	6.08229	0.145173	0.0106242	0.0184059	0.0162066	0.0184059
HOMER3	ENST00000392351.8	6.11361e-08	1.05059e-05	0.827028	0.152716	5.56716	0.18599	0.0133608	-0.0102919	0.0216227	0.0216227
MFSD14C	ENST00000645073.1	6.21707e-08	1.0656e-05	4.25979	0.787036	2.11606	4.46228	0.266078	-0.237227	0.66306	0.66306
FCGRT	ENST00000595881.1	6.26062e-08	1.06914e-05	0.654588	0.120969	5.98418	0.0895129	0.0049737	0.00437526	0.0169766	0.0169766
BRSK1	ENST00000309383.5	6.27766e-08	1.06914e-05	0.892941	0.165032	6.54191	0.237773	0.0273449	0.00830588	0.0135086	0.0135086
PITPNC1	ENST00000581322.6	7.02005e-08	1.16112e-05	0.831155	0.154184	6.17369	0.153698	0.0200927	0.0102344	0.0155665	0.0155665
MAP2K5	ENST00000178640.10	8.0036e-08	1.30423e-05	0.626385	0.116709	6.1074	0.0860032	0.00440771	0.00919334	0.0160239	0.0160239
ACAP3	ENST00000354700.10	8.04482e-08	1.30773e-05	0.758079	0.141271	5.748	0.117847	0.0106465	0.00105629	0.0192899	0.0192899
IRF2BPL	ENST00000238647.5	8.33898e-08	1.34563e-05	0.803277	0.149875	8.03539	0.200014	0.000386082	0.0333079	0.00983343	0.0333079
LSR	ENST00000605618.5	8.64972e-08	1.38899e-05	0.643629	0.120237	7.47474	0.109142	0.0038792	0.0178061	0.0103952	0.0178061
AUTS2	ENST00000644359.1	9.11165e-08	1.44296e-05	0.778144	0.145622	7.07743	0.159563	0.0019278	0.0298807	0.0113529	0.0298807
SERP1	ENST00000487153.1	9.15604e-08	1.44574e-05	5.0374	0.942853	2.89024	5.6678	1.01685	-0.372884	0.316606	0.316606
APBA3	ENST00000316757.4	9.44573e-08	1.48088e-05	0.69311	0.129867	5.71192	0.110212	0.00558398	0.00440017	0.0197141	0.0197141
MLXP1	ENST00000446594.1	9.86967e-08	1.54004e-05	1.82939	0.343282	3.56699	0.756869	0.0379281	0.126416	0.138835	0.138835
HLA-A	ENST00000547271.2	1.00668e-07	1.56419e-05	0.677267	0.127174	7.23768	0.139539	0.0133544	-0.00420526	0.0109055	0.0109055
SALL4	ENST00000395997.3	1.07776e-07	1.65439e-05	1.00431	0.189025	5.32862	0.234788	0.0286309	-0.0151114	0.0249648	0.0249648
KXD1	ENST00000540691.5	1.10964e-07	1.69156e-05	4.86619	0.916801	3.3101	6.29769	1.0704	-0.322366	0.190388	0.190388
DESI2	ENST00000263831.11	1.13346e-07	1.71995e-05	0.998033	0.188169	5.00864	0.238367	0.0161837	0.0369278	0.0303759	0.0369278
SHMT2	ENST00000554467.5	1.18755e-07	1.78454e-05	1.08006	0.203962	4.79354	0.295877	0.0269388	0.033197	0.0354618	0.0354618
MACROD1	ENST00000255681.7	1.21834e-07	1.81954e-05	0.799554	0.151124	5.23536	0.138392	0.00788067	0.00231713	0.026377	0.026377
WIZ	ENST00000545156.5	1.22136e-07	1.81993e-05	0.725131	0.137069	6.44518	0.192816	0.0141928	0.0060743	0.013989	0.013989
RCN3	ENST00000270645.8	1.27693e-07	1.88997e-05	0.623294	0.118001	6.19456	0.0886089	0.00244952	0.0184367	0.0154294	0.0184367
ABCB6	ENST00000265316.9	1.28269e-07	1.89046e-05	0.71159	0.134738	6.31796	0.137634	0.00594392	0.0212874	0.0146778	0.0212874
CD24	ENST00000610952.1	1.35932e-07	1.98965e-05	1.28192	0.243218	5.39692	0.645042	0.0197882	0.0689447	0.0239808	0.0689447
PPP1R12C	ENST00000263433.8	1.47364e-07	2.13807e-05	0.635414	0.120897	6.55012	0.0944597	0.00746767	0.0144565	0.0134692	0.0144565
PKMYT1	ENST00000573944.5	1.53873e-07	2.22276e-05	1.14122	0.217464	5.37489	0.301424	0.0250319	0.0459039	0.0242946	0.0459039
UNC93B1	ENST00000227471.7	1.58781e-07	2.27873e-05	0.622432	0.118738	5.87242	0.0823539	0.00316797	0.00417756	0.01798	0.01798
MCCC2	ENST00000628716.2	1.6346e-07	2.34081e-05	5.16088	0.98552	2.57317	6.21955	1.02089	-0.798076	0.435987	0.435987
DPPA4	ENST00000495679.5	1.72547e-07	2.45499e-05	0.843348	0.161353	7.01986	0.207512	0.00495909	0.0340932	0.0115353	0.0340932
RPL8	ENST00000528957.5	1.75447e-07	2.48555e-05	0.616975	0.118112	7.27894	0.117352	0.0101217	0.00478578	0.010804	0.010804
CBARP	ENST00000590083.5	1.84492e-07	2.58055e-05	1.06552	0.204344	4.96402	0.26814	0.031333	0.0192904	0.0313017	0.0313017
PKP3	ENST00000331563.7	1.92974e-07	2.6935e-05	0.630559	0.121122	5.79435	0.0910283	0.00323041	0.0187255	0.0187754	0.0187754
HS3ST3A1	ENST00000284110.2	1.99754e-07	2.77641e-05	0.709142	0.136385	5.50341	0.125001	0.00540426	0.0201117	0.0224969	0.0224969
LPCAT1	ENST00000283415.4	2.02018e-07	2.79614e-05	0.851116	0.163756	7.9556	0.316718	0.0071276	0.0330963	0.0098611	0.0330963
DAPK1	ENST00000622514.4	2.04418e-07	2.82059e-05	5.55292	1.06884	3.49229	8.4084	1.56193	-1.37756	0.151696	0.151696
DPEP3	ENST00000268793.5	2.07714e-07	2.85475e-05	0.632097	0.121738	5.75483	0.146885	0.00301807	0.0141069	0.019212	0.019212
COL1A2	ENST00000620463.1	2.14655e-07	2.93416e-05	0.650421	0.125414	7.77407	0.114385	0.00268833	0.0209048	0.00998764	0.0209048
PWWP2B	ENST00000305233.6	2.23596e-07	3.01901e-05	0.894943	0.172817	5.03222	0.270767	0.0148896	0.00683112	0.0299088	0.0299088
ZNF205	ENST00000219091.8	2.24512e-07	3.02203e-05	0.795605	0.153657	5.81104	0.13438	0.0168174	0.00394291	0.0185982	0.0185982
ARFRP1	ENST00000618838.4	2.32619e-07	3.1091e-05	0.982186	0.189935	5.55726	0.284795	0.0308551	0.0232576	0.0217583	0.0232576
TSTD1	ENST00000423014.3	2.34152e-07	3.11563e-05	0.656808	0.127043	5.76523	0.157998	0.00511515	0.0143758	0.0190948	0.0190948
PTP4A3	ENST00000329397.5	2.3452e-07	3.11563e-05	0.891327	0.172415	4.94908	0.164561	0.0129658	0.00765134	0.0316246	0.0316246
PTP4A3	ENST00000622569.3	2.3452e-07	3.11563e-05	0.891327	0.172415	4.94908	0.164561	0.0129658	0.00765134	0.0316246	0.0316246
SF1	ENST00000486867.1	2.37159e-07	3.14438e-05	0.968384	0.187396	5.26316	0.248516	0.0267303	-0.0168105	0.0259458	0.0259458
ANKRD11	ENST00000567736.6	2.41609e-07	3.18423e-05	0.632082	0.1224	6.80207	0.161598	0.00134877	0.0211237	0.0123367	0.0211237
TECPR1	ENST00000447648.6	2.45663e-07	3.21843e-05	0.585244	0.113398	6.09812	0.076625	0.00319783	0.00669081	0.0160908	0.0160908
SQSTM1	ENST00000389805.9	2.5051e-07	3.27545e-05	0.60852	0.117991	6.83449	0.0862066	0.00867722	0.00248987	0.0122058	0.0122058
CLUHP3	ENST00000562354.2	2.73137e-07	3.51194e-05	0.717438	0.13955	5.40191	0.154582	0.00510407	0.0241071	0.0239101	0.0241071
CHERP	ENST00000544299.5	2.7135e-07	3.51194e-05	4.84272	0.941737	3.58935	6.73258	1.06181	0.268498	0.135208	0.268498
SNHG32	ENST00000375640.7	2.73375e-07	3.51194e-05	0.949315	0.184658	4.75271	0.220854	0.00919028	0.0419576	0.036639	0.0419576
SNHG32	ENST00000424962.6	2.73375e-07	3.51194e-05	0.949315	0.184658	4.75271	0.220854	0.00919028	0.0419576	0.036639	0.0419576
SNHG32	ENST00000444974.6	2.73375e-07	3.51194e-05	0.949315	0.184658	4.75271	0.220854	0.00919028	0.0419576	0.036639	0.0419576
SNHG32	ENST00000414536.6	2.73375e-07	3.51194e-05	0.949315	0.184658	4.75271	0.220854	0.00919028	0.0419576	0.036639	0.0419576
RPS6KA2	ENST00000265678.9	2.80251e-07	3.58634e-05	0.739909	0.144056	6.59639	0.14474	0.013862	0.0172661	0.0132504	0.0172661
RBM47	ENST00000514014.1	2.91305e-07	3.71344e-05	5.16913	1.00783	2.60593	6.54899	1.10133	-0.580894	0.422243	0.422243
TMEM129	ENST00000382936.8	2.97531e-07	3.77824e-05	0.626528	0.122249	6.78532	0.0953186	0.00224891	0.0201684	0.0124061	0.0201684
EEF1B2	ENST00000445505.5	3.13652e-07	3.93761e-05	4.76819	0.932189	3.46312	6.38041	1.14629	-0.131928	0.157176	0.157176
EEF1B2	ENST00000637452.1	3.13652e-07	3.93761e-05	4.76819	0.932189	3.46312	6.38041	1.14629	-0.131928	0.157176	0.157176
ZNRF3	ENST00000406323.3	3.72454e-07	4.6059e-05	0.649218	0.127735	5.9082	0.110458	0.00683186	0.00977868	0.0176426	0.0176426
TSSC4	ENST00000333256.11	3.73995e-07	4.61632e-05	0.686227	0.135038	5.91735	0.131392	0.00370894	0.0236439	0.0175589	0.0236439
PROM1	ENST00000505450.5	3.87466e-07	4.74718e-05	0.816806	0.160947	6.335	0.141916	0.0242747	-0.0019142	0.014581	0.014581
FAM222B	ENST00000452648.7	3.88389e-07	4.74969e-05	0.765863	0.150922	6.96939	0.135607	0.00472493	0.0294412	0.011705	0.0294412
SCNN1A	ENST00000228916.7	3.90342e-07	4.76477e-05	0.604308	0.119108	7.31307	0.125084	0.0063797	0.0149004	0.0107242	0.0149004
HNRNPL	ENST00000221419.9	4.08143e-07	4.94555e-05	0.682898	0.134824	5.72768	0.121418	0.00773993	0.0168684	0.0195262	0.0195262
HNRNPL	ENST00000634753.1	4.08143e-07	4.94555e-05	0.682898	0.134824	5.72768	0.121418	0.00773993	0.0168684	0.0195262	0.0195262
TCF3	ENST00000610756.4	4.3442e-07	5.21473e-05	0.647934	0.128222	6.49029	0.1138	0.0081855	0.0164758	0.013761	0.0164758
CNBP	ENST00000441626.6	4.43064e-07	5.27214e-05	5.53091	1.09535	4.22484	8.6791	1.12387	0.675808	0.0626009	0.675808
LEMD2	ENST00000293760.10	4.61317e-07	5.46308e-05	0.673672	0.133619	6.45957	0.107228	0.00716352	0.0196175	0.0139154	0.0196175
RGL3	ENST00000380456.7	4.84772e-07	5.70686e-05	0.825994	0.16414	5.63534	0.183628	0.0197227	0.011015	0.0206903	0.0206903
CSNK1G3	ENST00000508708.1	4.92251e-07	5.77435e-05	3.88543	0.772557	2.73721	4.25013	0.446455	0.448811	0.37072	0.448811
UBALD1	ENST00000283474.12	4.95132e-07	5.78762e-05	0.647605	0.128795	6.04155	0.111941	0.00836712	0.00701528	0.0165151	0.0165151
LRCH4	ENST00000310300.11	5.04376e-07	5.88528e-05	0.595299	0.118476	6.76551	0.0891554	0.0057114	0.0153434	0.0124896	0.0153434
PATZ1	ENST00000215919.3	5.07204e-07	5.90785e-05	0.790573	0.157373	6.14403	0.17334	0.00595796	0.0311913	0.0157669	0.0311913
DYRK1A	ENST00000644942.1	5.13929e-07	5.97566e-05	0.982235	0.195624	5.53257	0.284248	0.0353065	0.0180765	0.0220965	0.0220965
FKBP1A	ENST00000439640.4	5.61223e-07	6.42396e-05	0.642929	0.12848	6.79088	0.110534	0.0123779	-0.00165185	0.0123829	0.0123829
AC005726.1	ENST00000481916.6	5.81088e-07	6.61701e-05	0.844953	0.169079	5.18909	0.170942	0.0157641	0.0145316	0.0271173	0.0271173
ARHGAP33	ENST00000587447.3	5.98287e-07	6.76627e-05	0.59927	0.120052	6.31735	0.0885673	0.00396962	0.017649	0.0146813	0.017649
DUS1L	ENST00000538833.6	6.30881e-07	7.10122e-05	0.669258	0.134348	6.0212	0.111705	0.0103992	-0.00119573	0.016675	0.016675
REEP2	ENST00000378339.7	6.29378e-07	7.10122e-05	0.704508	0.141411	6.63172	0.108104	0.016909	-0.0128927	0.0130867	0.0130867
MARK3	ENST00000303622.13	6.60101e-07	7.40209e-05	0.873201	0.175597	6.77266	0.205625	0.0337924	0.00494105	0.0124592	0.0124592
PSMA7	ENST00000484488.5	6.64563e-07	7.43951e-05	0.621423	0.124999	6.23804	0.101321	0.00828331	-0.00121719	0.0151537	0.0151537
PLCB2	ENST00000559381.5	6.83164e-07	7.60912e-05	1.05762	0.212969	4.675	0.269867	0.0289116	0.0290448	0.039122	0.039122
SLC1A5	ENST00000542575.6	6.8316e-07	7.60912e-05	0.681941	0.13732	8.89228	0.128104	0.000344036	0.0279409	0.0106318	0.0279409
TPM4	ENST00000300933.8	6.95429e-07	7.73271e-05	0.90111	0.181579	7.02253	0.284098	0.0144359	0.0350205	0.0115266	0.0350205
ATG4D	ENST00000309469.9	7.00518e-07	7.74452e-05	0.594488	0.119827	6.47362	0.110467	0.00769337	0.00896686	0.0138444	0.0138444
VLDLR	ENST00000382096.5	7.21886e-07	7.93055e-05	3.92675	0.792421	2.8967	4.74369	0.314497	0.6274	0.314381	0.6274
ZSCAN10	ENST00000538082.5	7.31929e-07	8.00404e-05	1.095	0.221092	5.33753	0.30786	0.0337918	0.0395306	0.0248344	0.0395306
CUL3	ENST00000617432.4	7.74135e-07	8.36875e-05	5.02848	1.01755	3.82675	7.21793	1.45162	0.0765488	0.101473	0.101473
POLR2M	ENST00000649091.1	8.49667e-07	9.00865e-05	4.02761	0.818022	2.21629	4.43696	0.395966	-0.315278	0.607774	0.607774
HDHD5	ENST00000336737.8	8.48354e-07	9.00865e-05	1.44137	0.29273	6.8056	0.610887	0.0962354	0.0323009	0.0123222	0.0323009
MAP3K10	ENST00000253055.8	8.52257e-07	9.02165e-05	0.697179	0.141617	5.49127	0.145991	0.00741865	0.018183	0.0226642	0.0226642
NT5C3B	ENST00000523903.5	8.69272e-07	9.15781e-05	0.691765	0.140627	6.49618	0.174428	0.0159323	-0.00140722	0.0137318	0.0137318
SLC37A2	ENST00000354617.5	9.05916e-07	9.46846e-05	0.674934	0.137432	5.4669	0.145363	0.00533031	0.00814285	0.0230009	0.0230009
NELFA	ENST00000467661.5	9.30138e-07	9.67578e-05	5.03302	1.02592	2.34861	5.81345	1.03921	-0.448419	0.539547	0.539547
VAV2	ENST00000371851.1	9.62587e-07	9.9367e-05	0.729703	0.148945	6.41226	0.15202	0.012954	0.020323	0.0141602	0.020323
GSTT1	ENST00000612885.3	9.6273e-07	9.9367e-05	0.668958	0.136547	5.73929	0.14023	0.00857723	0.0107034	0.0193903	0.0193903
HMGCL	ENST00000374490.8	9.73191e-07	0.000100134	0.759929	0.155183	5.72231	0.147607	0.00802945	0.0280932	0.0195898	0.0280932
PTPRN	ENST00000295718.7	9.85391e-07	0.000101232	0.839644	0.171547	6.25415	0.19321	0.0186544	0.0254883	0.0150546	0.0254883
HGH1	ENST00000347708.5	9.97666e-07	0.000102176	0.788178	0.161112	5.75319	0.149078	0.0197052	0.00988102	0.0192306	0.0192306
LRRC14	ENST00000292524.6	1.02875e-06	0.000105034	0.6368	0.13033	5.8986	0.13996	0.00774737	0.0168688	0.0177315	0.0177315
PRR5	ENST00000336985.11	1.10884e-06	0.00011183	0.8277	0.169915	5.45102	0.161668	0.018165	0.0251415	0.0232214	0.0251415
SYT6	ENST00000610096.1	1.11584e-06	0.000112365	4.29115	0.881135	2.60316	6.67381	0.741207	-0.418853	0.42339	0.42339
FOXA3	ENST00000302177.3	1.12153e-06	0.000112596	0.665958	0.136775	6.7073	0.104304	0.00130385	0.026757	0.0127443	0.026757
ATXN2L	ENST00000562583.5	1.17353e-06	0.000116338	1.02321	0.210534	5.98837	0.302753	0.0135254	0.0529612	0.0169418	0.0529612
NME2	ENST00000393190.4	1.18029e-06	0.000116724	0.699391	0.14394	5.9283	0.11641	0.0102016	0.0208764	0.01746	0.0208764
INPP5B	ENST00000373024.8	1.18631e-06	0.000116969	0.960145	0.197646	5.81055	0.24864	0.0399923	-0.00906656	0.0186034	0.0186034
NATD1	ENST00000611551.1	1.23005e-06	0.000120742	0.659069	0.13587	6.44382	0.10276	0.00173465	0.0259563	0.013996	0.0259563
KLF3	ENST00000514033.1	1.24805e-06	0.000122327	1.01563	0.209502	4.54436	0.228251	0.021672	0.00526387	0.0441645	0.0441645
MAD2L2	ENST00000456915.1	1.28713e-06	0.000125415	0.713123	0.147287	5.38486	0.123617	0.00838795	0.0235733	0.0241521	0.0241521
MRPL34	ENST00000594999.1	1.33684e-06	0.000129495	4.28081	0.885526	3.29858	5.69499	0.443423	0.732812	0.193192	0.732812
PPP4R3A	ENST00000557018.5	1.35157e-06	0.000130731	4.10357	0.849246	2.15638	4.94195	0.441468	0.0287728	0.640359	0.640359
TESMIN	ENST00000255087.10	1.36164e-06	0.000131513	0.608753	0.126022	5.87324	0.118775	0.0058501	0.00986182	0.0179721	0.0179721
ABCD4	ENST00000553486.5	1.41359e-06	0.000135935	0.863341	0.179002	5.75543	0.252403	0.0288574	0.00828414	0.0192052	0.0192052
HEXD	ENST00000337014.10	1.46502e-06	0.000140473	1.18088	0.245202	4.58245	0.443055	0.0476196	0.0393128	0.0425666	0.0425666
SNAPC2	ENST00000221573.11	1.56609e-06	0.000148229	0.745571	0.155243	6.09503	0.139091	0.0200372	0.00852749	0.0161133	0.0161133
ETNK2	ENST00000367202.9	1.57667e-06	0.000148805	0.585882	0.122027	6.42277	0.0753112	0.00823069	-0.00156154	0.0141051	0.0141051
REX1BD	ENST00000358607.10	1.60301e-06	0.000151075	0.870732	0.18148	5.11929	0.201983	0.0211038	-0.00350363	0.0282988	0.0282988
FBRSL1	ENST00000539264.5	1.63505e-06	0.000153222	1.33475	0.278423	3.93771	0.401935	0.0277204	0.00462154	0.0885586	0.0885586
WDR13	ENST00000218056.9	1.65055e-06	0.000154456	0.890408	0.185808	5.2431	0.22549	0.0171055	0.0346814	0.0262559	0.0346814
MIB2	ENST00000483015.1	1.77701e-06	0.000164891	1.01844	0.213186	4.56303	0.304658	0.024805	0.0180584	0.0433672	0.0433672
FAM124A	ENST00000280057.6	1.82118e-06	0.000168517	2.43389	0.510002	4.18447	1.44508	0.324497	-0.258761	0.0656564	0.0656564
ZNF423	ENST00000563137.6	1.85077e-06	0.000170539	0.691463	0.144989	6.61172	0.139989	0.0183537	0.0102212	0.013179	0.013179
MECR	ENST00000263702.10	1.95197e-06	0.00017862	0.825791	0.173546	5.51398	0.138591	0.0228258	-0.00869045	0.0223517	0.0223517
CLDN3	ENST00000395145.3	1.97251e-06	0.000180002	0.650733	0.136817	5.45404	0.192379	0.00489897	0.00856945	0.0231794	0.0231794
RAB15	ENST00000533601.6	1.98385e-06	0.000180787	1.00632	0.211631	6.01124	0.205774	0.0504268	-0.0386104	0.0167548	0.0167548
RTN4RL2	ENST00000335099.8	2.07871e-06	0.000187879	0.607886	0.128094	6.03594	0.226699	0.00305121	0.021561	0.0165587	0.021561
RTN4	ENST00000337526.11	2.07532e-06	0.000187879	1.05773	0.222869	6.79964	0.326484	0.027393	0.047113	0.0123467	0.047113
SMG9	ENST00000601170.5	2.09152e-06	0.000188779	0.667244	0.140639	5.63644	0.172844	0.00899343	0.0161114	0.0206756	0.0206756
TTC39C	ENST00000584250.1	2.16028e-06	0.000193664	0.796481	0.168111	5.73134	0.250735	0.00602265	0.0363694	0.0194831	0.0363694
SBNO2	ENST00000361757.8	2.1757e-06	0.000194783	0.809848	0.170985	6.8638	0.234936	0.0253445	0.0185092	0.012091	0.0185092
HCFC1R1	ENST00000248089.7	2.19428e-06	0.000195651	0.800113	0.168991	5.66718	0.199716	0.0225654	0.0146519	0.0202714	0.0202714
TRAP1	ENST00000576106.5	2.21153e-06	0.00019666	1.10461	0.233382	4.30653	0.318418	0.0247458	-0.00464904	0.0569546	0.0569546
SNRPB	ENST00000474384.2	2.22527e-06	0.000197616	1.42785	0.301756	4.15349	0.49798	0.0684601	0.0393452	0.0681246	0.0681246
EIF3C	ENST00000564243.5	2.24961e-06	0.00019871	0.720032	0.152239	8.26045	0.159486	0.0249187	0.00550876	0.00984661	0.00984661
ZNF331	ENST00000253144.13	2.29031e-06	0.000201498	0.602229	0.12743	6.56039	0.0893554	0.0109375	0.00896017	0.0134201	0.0134201
NTMT1	ENST00000372483.8	2.31598e-06	0.000203217	0.711897	0.150708	5.86067	0.117857	0.0159748	0.0113172	0.0180944	0.0180944
VAPB	ENST00000395802.7	2.38563e-06	0.000208223	0.722292	0.153104	5.84328	0.117415	0.0168939	0.00572799	0.0182671	0.0182671
CDIPT	ENST00000219789.11	2.54458e-06	0.000218352	0.597207	0.126943	6.47072	0.093552	0.0103129	0.0048398	0.013859	0.013859
CHCHD10	ENST00000517886.1	2.62025e-06	0.000223974	0.863231	0.183723	4.63161	0.177323	0.0099665	0.00527228	0.0406648	0.0406648
CHCHD10	ENST00000626041.1	2.62025e-06	0.000223974	0.863231	0.183723	4.63161	0.177323	0.0099665	0.00527228	0.0406648	0.0406648
POLA2	ENST00000265465.8	2.62978e-06	0.000224209	0.707461	0.150594	6.04266	0.125492	0.0175114	0.0118289	0.0165065	0.0165065
P3H3	ENST00000290510.10	2.66069e-06	0.000225971	0.910789	0.193974	5.55272	0.314532	0.0239836	0.0324554	0.0218205	0.0324554
SDC2	ENST00000520233.1	2.71683e-06	0.00022956	4.29292	0.915113	4.08526	5.78683	0.710713	0.545433	0.0739572	0.545433
TKT	ENST00000487660.1	2.73301e-06	0.000230196	0.848706	0.180964	6.63616	0.189217	0.0103392	0.0387826	0.0130663	0.0387826
TIMM22	ENST00000617832.2	2.7348e-06	0.000230196	4.5076	0.961152	3.45558	4.99921	1.22708	0.113341	0.158635	0.158635
TIMM22	ENST00000613269.2	2.7348e-06	0.000230196	4.5076	0.961152	3.45558	4.99921	1.22708	0.113341	0.158635	0.158635
SLC38A9	ENST00000504880.5	2.7395e-06	0.000230299	0.769379	0.164066	5.33369	0.150119	0.00715146	0.0332252	0.0248905	0.0332252
TRMU	ENST00000453630.5	2.76274e-06	0.000231664	5.00503	1.06769	2.52315	5.87546	1.25229	-1.20937	0.457654	0.457654
CXXC1	ENST00000412036.6	2.81588e-06	0.000234929	0.64629	0.137984	6.26442	0.151523	0.0135669	-0.000265679	0.0149924	0.0149924
FKBP1A	ENST00000614856.1	2.82003e-06	0.000234979	0.638689	0.13637	5.54188	0.141324	0.0059262	0.0172728	0.0219689	0.0219689
ADCK2	ENST00000072869.9	2.85606e-06	0.000237383	0.705711	0.150764	5.3803	0.121297	0.0098773	0.0178666	0.0242172	0.0242172
TCF3	ENST00000395423.7	2.93169e-06	0.000242749	0.865815	0.185179	5.87759	0.175745	0.0335069	0.0130599	0.0179303	0.0179303
PHYKPL	ENST00000489262.5	2.94145e-06	0.000242954	4.25817	0.910865	2.07446	4.39903	0.557377	-0.448136	0.687135	0.687135
UPP1	ENST00000395560.7	2.99689e-06	0.00024661	0.720796	0.154312	5.80874	0.193089	0.00826881	0.0274495	0.0186224	0.0274495
CHMP2B	ENST00000494980.5	3.00192e-06	0.000246717	4.2758	0.915455	3.29231	5.63391	1.06235	-0.107591	0.194737	0.194737
RNF41	ENST00000552656.5	3.04079e-06	0.000249292	0.805501	0.172556	5.43737	0.137239	0.0212518	-0.0031504	0.0234117	0.0234117
ATP2C1	ENST00000513801.5	3.0891e-06	0.000252314	5.0313	1.07857	4.21438	7.23348	1.40712	0.337833	0.0633755	0.337833
PLEKHG3	ENST00000247226.13	3.13285e-06	0.000254668	0.639388	0.137151	6.75316	0.191402	0.00240837	0.0258074	0.0125425	0.0258074
NOP58	ENST00000426814.5	3.13331e-06	0.000254668	1.13733	0.243964	4.38272	0.290844	0.0369823	0.0269156	0.0522953	0.0522953
KLHL42	ENST00000539176.1	3.22534e-06	0.00026023	0.868184	0.186469	4.848	0.174496	0.0181457	0.0038123	0.0340102	0.0340102
KCNS1	ENST00000306117.5	3.23687e-06	0.000260842	0.997403	0.214256	4.64591	0.230112	0.0287159	0.0145273	0.0401427	0.0401427
GRK6	ENST00000355472.10	3.31686e-06	0.000266315	0.689406	0.148254	6.00921	0.115012	0.0161978	0.0108714	0.0167712	0.0167712
KIAA1522	ENST00000373481.7	3.36468e-06	0.000268849	0.616338	0.132626	7.81999	0.145844	0.00634044	0.0200439	0.00994721	0.0200439
EIF3C	ENST00000331666.10	3.37852e-06	0.00026963	5.69728	1.22618	3.64576	9.52572	0.657121	1.59817	0.12641	1.59817
C11orf80	ENST00000527634.5	3.59389e-06	0.000285783	4.61206	0.995354	2.25036	5.01655	0.896364	-0.744559	0.589731	0.589731
PCGF2	ENST00000616129.4	3.65323e-06	0.000289112	0.88625	0.191407	5.65982	0.227093	0.0345883	0.01574	0.0203665	0.0203665
PCGF2	ENST00000632510.1	3.65323e-06	0.000289112	0.88625	0.191407	5.65982	0.227093	0.0345883	0.01574	0.0203665	0.0203665
FAM167A	ENST00000284486.9	3.67494e-06	0.000290483	1.24407	0.268757	3.98261	0.472363	0.024531	0.0492592	0.0838149	0.0838149
LINGO1	ENST00000561030.5	3.71175e-06	0.000292345	0.960635	0.207619	6.25606	0.25903	0.0471424	0.0175163	0.015043	0.0175163
CHFR	ENST00000450056.6	3.72613e-06	0.00029278	0.612789	0.132463	6.56176	0.109368	0.0129062	-0.00124572	0.0134136	0.0134136
NA	ENST00000393262.3	3.73313e-06	0.000292982	6.11139	1.32118	3.38516	9.52175	2.44512	-2.18821	0.173155	0.173155
UCHL1	ENST00000381760.8	3.8151e-06	0.000298001	0.7486	0.161992	6.54564	0.237723	0.00490706	0.0344552	0.0134906	0.0344552
TKFC	ENST00000529479.5	3.83305e-06	0.00029905	0.670495	0.145121	5.49312	0.153601	0.00895168	0.0110411	0.0226386	0.0226386
FYN	ENST00000354650.7	3.85228e-06	0.000300197	4.65044	1.00676	3.60221	6.55373	0.653126	0.867236	0.13316	0.867236
LRIG1	ENST00000383703.3	4.03996e-06	0.000313714	0.992072	0.215232	5.70462	0.33709	0.0194081	0.0500791	0.0198027	0.0500791
NA	ENST00000633161.1	4.03996e-06	0.000313714	0.992072	0.215232	5.70462	0.33709	0.0194081	0.0500791	0.0198027	0.0500791
HTR7	ENST00000336152.8	4.11208e-06	0.000317821	0.694793	0.150857	6.0963	0.184127	0.0131987	0.0209381	0.016104	0.0209381
DDX10	ENST00000524979.1	4.11786e-06	0.000317897	4.34347	0.943136	2.07768	4.73227	0.649013	-0.132501	0.685246	0.685246
ARHGAP4	ENST00000350060.9	4.20515e-06	0.000323503	0.710488	0.154421	6.02815	0.113653	0.0191489	0.00270364	0.01662	0.01662
DVL3	ENST00000478247.1	4.25445e-06	0.000326537	0.840046	0.182676	5.96876	0.157276	0.0329494	-0.000435443	0.0171066	0.0171066
SLX1A	ENST00000251303.10	4.28885e-06	0.000328795	5.60268	1.2188	3.43695	8.24464	2.0659	-1.73761	0.162323	0.162323
ENTPD2	ENST00000355097.7	4.34019e-06	0.000332327	0.957231	0.208348	4.7817	0.252405	0.0293184	0.0128055	0.0357948	0.0357948
COQ8B	ENST00000324464.8	4.45242e-06	0.00033976	0.608693	0.13264	6.33416	0.105382	0.0118043	0.00987695	0.0145858	0.0145858
BACH2	ENST00000343122.7	4.47609e-06	0.000341173	4.4909	0.978845	2.26311	5.0142	0.854142	-0.726329	0.583065	0.583065
GPSM1	ENST00000440944.6	4.49553e-06	0.000341867	0.5903	0.128688	6.15289	0.0828896	0.00913473	0.0141062	0.0157063	0.0157063
HS3ST3B1	ENST00000466596.5	4.63628e-06	0.000351214	1.05364	0.230021	5.40752	0.743587	0.0439168	0.0354479	0.0238309	0.0354479
ELAVL1	ENST00000593807.1	4.76262e-06	0.00035847	1.05055	0.22963	4.63248	0.262182	0.0384624	0.0339183	0.0406324	0.0406324
RNA5-8SP6	ENST00000515896.1	4.77391e-06	0.000358911	1.518	0.33184	7.74831	0.563812	0.000519798	0.164657	0.0100128	0.164657
PCBP2	ENST00000550520.6	5.0624e-06	0.000374042	0.946885	0.207551	6.66156	0.339879	0.0288251	0.0357909	0.0129504	0.0357909
PRKCH	ENST00000332981.10	5.2216e-06	0.000382995	0.807643	0.177283	5.75315	0.179998	0.0209829	0.0261608	0.0192311	0.0261608
GOLT1A	ENST00000308302.4	5.41069e-06	0.000395112	1.17704	0.258794	4.59704	0.354715	0.0128048	0.0876564	0.0419842	0.0876564
SLC25A37	ENST00000290075.10	5.40768e-06	0.000395112	0.891115	0.195922	5.21977	0.206057	0.0309552	-0.011581	0.0266229	0.0266229
TAF10	ENST00000532344.1	5.57346e-06	0.000405209	1.14839	0.252841	4.22511	0.325877	0.0333119	-0.00907526	0.0625811	0.0625811
ELAC2	ENST00000578071.1	5.75559e-06	0.000416619	4.54704	1.00262	2.13342	4.72568	0.854652	-0.64023	0.653209	0.653209
TAF1C	ENST00000566732.5	5.78042e-06	0.000417959	4.79265	1.05699	2.70268	6.87343	1.2921	-0.866902	0.383722	0.383722
TC2N	ENST00000610758.4	5.89978e-06	0.000425195	4.79682	1.05891	2.86848	5.90129	1.35779	-0.980016	0.324146	0.324146
NA	ENST00000435882.6	5.93567e-06	0.000426852	7.61454	1.68141	3.443	14.2953	0.630983	3.60971	0.161114	3.60971
EIF4A1	ENST00000577269.5	5.99634e-06	0.000430747	0.709651	0.156776	7.75515	0.126761	0.0206131	0.0162551	0.010006	0.0162551
CYREN	ENST00000424142.5	6.06872e-06	0.000435002	0.601733	0.13301	5.99851	0.096829	0.00967911	0.0141977	0.0168582	0.0168582
ZIC3	ENST00000370606.3	6.29244e-06	0.000448608	0.698527	0.154667	5.3782	0.187906	0.0116358	0.0183804	0.0242472	0.0242472
SYPL2	ENST00000369872.4	6.31931e-06	0.000448909	0.812105	0.179852	5.0467	0.190509	0.00786102	0.040659	0.029629	0.040659
ZNF232	ENST00000570486.5	6.36606e-06	0.000450941	0.71741	0.158935	5.64409	0.148049	0.0173173	-0.00114582	0.0205733	0.0205733
AC104304.2	ENST00000505797.1	6.38685e-06	0.000450965	0.998732	0.221293	4.4577	0.242758	0.0143187	0.0591374	0.0482421	0.0591374
CASZ1	ENST00000496432.6	6.38296e-06	0.000450965	0.862378	0.191075	4.81336	0.176957	0.0198462	0.0200041	0.0349184	0.0349184
BUB1	ENST00000466333.5	6.42008e-06	0.000452828	5.489	1.21652	4.42341	9.131	0.621312	1.59856	0.050033	1.59856
UQCRH	ENST00000496387.5	6.45252e-06	0.000454148	0.916625	0.203198	6.08546	0.204676	0.00414993	0.0577843	0.0161833	0.0577843
CCDC85B	ENST00000312579.3	6.48608e-06	0.000456024	0.637424	0.141339	5.79872	0.102167	0.00302755	0.0269375	0.0187287	0.0269375
ARVCF	ENST00000263207.8	6.61315e-06	0.000463481	0.661054	0.146713	5.72992	0.117472	0.0127871	0.0146482	0.0194998	0.0194998
G3BP1	ENST00000517947.5	6.6259e-06	0.000463883	4.47859	0.994056	2.4329	5.8931	0.983425	-0.499389	0.498797	0.498797
GUK1	ENST00000391865.7	7.02294e-06	0.000486532	0.714165	0.158951	5.96321	0.146972	0.0207442	-0.00792509	0.0171539	0.0171539
ZNF496	ENST00000478225.5	7.14989e-06	0.000493949	0.916909	0.204249	5.28195	0.230917	0.0254702	0.0371062	0.0256597	0.0371062
ADH5	ENST00000502590.5	7.14953e-06	0.000493949	0.78443	0.174738	5.8418	0.137025	0.0275179	-0.0192775	0.018282	0.018282
MEX3C	ENST00000406189.4	7.62208e-06	0.000518059	0.756356	0.168998	6.8996	0.206543	0.00553991	0.0373006	0.0119553	0.0373006
SLC17A9	ENST00000488738.5	7.66231e-06	0.000519937	0.830349	0.185577	5.16593	0.236028	0.0147425	0.0369159	0.0275	0.0369159
ECE1	ENST00000649812.1	8.08119e-06	0.000543898	4.12573	0.924424	2.05483	4.81494	0.583112	0.17328	0.698728	0.698728
CPT1B	ENST00000405237.7	8.12999e-06	0.000545845	5.13991	1.152	2.85721	7.11719	1.66259	-1.65373	0.328064	0.328064
ZNF408	ENST00000311764.2	8.15379e-06	0.000546076	0.88855	0.199177	5.83117	0.197158	0.00359698	0.0559103	0.0183898	0.0559103
DIPK1B	ENST00000371691.5	8.65078e-06	0.000575791	0.816696	0.183593	4.92025	0.216091	0.0182911	0.0164279	0.0322683	0.0322683
MVB12A	ENST00000317040.12	8.67641e-06	0.000576336	0.603516	0.135689	5.8878	0.0906523	0.00978435	0.00462966	0.017833	0.017833
GLI1	ENST00000228682.7	8.72105e-06	0.000578721	0.693295	0.155913	5.97476	0.128222	0.0194077	0.00584355	0.0170557	0.0170557
LMO4	ENST00000495705.5	9.41197e-06	0.00061653	1.59487	0.359995	3.88072	0.515211	0.0994193	-0.0707194	0.0949749	0.0949749
IQSEC3	ENST00000538872.5	9.84347e-06	0.000639101	0.915097	0.207008	4.52105	0.231809	0.0190782	0.0253154	0.0452004	0.0452004
NPRL3	ENST00000399953.7	9.90666e-06	0.000642573	0.602296	0.136291	6.43838	0.145738	0.0104809	0.0173819	0.014024	0.0173819
CASZ1	ENST00000377022.8	1.00479e-05	0.000649965	0.922368	0.208863	4.64911	0.271485	0.0254078	-0.0103212	0.0400277	0.0400277
ACOT7	ENST00000545482.5	1.03792e-05	0.000667983	0.825256	0.18717	5.24901	0.15397	0.026385	-0.0085867	0.0261641	0.0261641
INF2	ENST00000252527.8	1.04369e-05	0.000669096	0.58627	0.133004	6.44148	0.0772649	0.012527	-0.00515007	0.014008	0.014008
RAD23B	ENST00000419616.5	1.05817e-05	0.000676412	0.793233	0.180078	5.22656	0.166291	0.022127	0.017064	0.0265154	0.0265154
LITAF	ENST00000570904.5	1.06108e-05	0.000677616	0.794269	0.180338	5.69667	0.14751	0.0288826	0.00330415	0.0199001	0.0199001
CDC25B	ENST00000245960.9	1.06323e-05	0.000678334	0.822376	0.186738	5.95038	0.166769	0.035042	-0.00947928	0.0172648	0.0172648
RNF44	ENST00000504160.1	1.07323e-05	0.000682085	0.745448	0.169348	5.04934	0.156955	0.0134396	0.016072	0.0295786	0.0295786
ERVMER34-1	ENST00000454756.6	1.09598e-05	0.000693038	0.665191	0.151272	5.28609	0.115032	0.00872768	0.00984116	0.0255972	0.0255972
MFHAS1	ENST00000644336.1	1.09675e-05	0.000693038	0.838651	0.190725	4.676	0.253974	0.0154764	0.0229918	0.0390879	0.0390879
MFHAS1	ENST00000644614.1	1.09675e-05	0.000693038	0.838651	0.190725	4.676	0.253974	0.0154764	0.0229918	0.0390879	0.0390879
ZNF544	ENST00000597240.5	1.0981e-05	0.000693227	4.24349	0.965111	1.88793	4.11209	0.593961	-0.245926	0.803197	0.803197
ASPSCR1	ENST00000306739.9	1.12967e-05	0.000711121	0.590132	0.134404	6.0054	0.0973917	0.00401131	0.0230852	0.0168021	0.0230852
MRPS34	ENST00000177742.7	1.1804e-05	0.000735362	0.701422	0.160099	5.68385	0.135207	0.0183879	0.00584882	0.0200596	0.0200596
SETD4	ENST00000399205.5	1.1793e-05	0.000735362	5.15497	1.17656	2.297	5.43611	1.51089	-1.41704	0.56556	0.56556
TOR2A	ENST00000373284.10	1.22382e-05	0.000756006	0.71897	0.1644	5.21401	0.116647	0.0138262	0.00574089	0.0267148	0.0267148
TPRA1	ENST00000355552.7	1.24553e-05	0.000767264	0.715474	0.163744	5.85567	0.132349	0.0134531	0.0267651	0.0181436	0.0267651
WNK2	ENST00000395477.6	1.26673e-05	0.000776707	0.809597	0.185442	6.79228	0.21095	0.0193908	0.0321922	0.0123771	0.0321922
WHRN	ENST00000362057.4	1.38368e-05	0.000836023	0.871024	0.2004	5.38614	0.188896	0.0229002	0.0373399	0.0241339	0.0373399
KIRREL2	ENST00000360202.9	1.46749e-05	0.000877046	0.604819	0.139568	5.58599	0.114899	0.00379185	0.025427	0.0213651	0.025427
LZTS3	ENST00000337576.6	1.47378e-05	0.000877895	0.741539	0.171155	6.8682	0.232297	0.0318668	-0.0147139	0.012074	0.012074
ZNF777	ENST00000247930.5	1.47301e-05	0.000877895	0.768359	0.17734	6.37836	0.153362	0.00181443	0.0453598	0.0143415	0.0453598
RPAIN	ENST00000571558.5	1.48155e-05	0.000879099	4.61475	1.06541	2.05809	4.50521	1.00587	-0.912466	0.696788	0.696788
SAMD4A	ENST00000554335.5	1.5146e-05	0.000891772	0.873389	0.201867	4.77774	0.201985	0.0252178	0.0139492	0.0359078	0.0359078
CRNKL1	ENST00000521379.1	1.51495e-05	0.000891772	4.40495	1.01813	2.15452	4.68799	0.913493	-0.762547	0.641397	0.641397
SETD4	ENST00000332131.8	1.51504e-05	0.000891772	0.912474	0.210904	5.63091	0.206227	0.0193324	0.0473884	0.0207501	0.0473884
RHOT1	ENST00000583994.5	1.52055e-05	0.000894218	4.29167	0.992134	3.44055	5.9474	1.00239	0.474101	0.161601	0.474101
WSCD1	ENST00000576083.5	1.53656e-05	0.000900878	1.16089	0.268514	4.15003	0.351298	0.0397422	0.0351653	0.0684071	0.0684071
MMP24OS	ENST00000424358.1	1.57484e-05	0.000917985	0.638845	0.147951	5.40475	0.095246	0.00896434	-0.00433706	0.0238699	0.0238699
P4HB	ENST00000466567.2	1.60353e-05	0.000931427	1.14139	0.264581	4.32059	0.425256	0.0325944	0.0724106	0.0560518	0.0724106
ALKBH6	ENST00000490986.5	1.60711e-05	0.00093269	4.47223	1.03681	2.16949	4.77147	0.979337	-0.795189	0.633115	0.633115
MSI2	ENST00000416426.6	1.63782e-05	0.000948847	0.849778	0.197197	5.2907	0.348322	0.0328021	-0.0222617	0.0255278	0.0255278
CEBPB	ENST00000303004.4	1.6618e-05	0.000961054	1.28361	0.298092	6.45105	0.418607	0.00210118	0.131187	0.0139589	0.131187
ZFAND3	ENST00000287218.9	1.66406e-05	0.000961521	0.715706	0.16622	7.33668	0.182315	0.00287192	0.0385718	0.0106712	0.0385718
SLC44A2	ENST00000586078.5	1.67613e-05	0.000965965	0.630693	0.146531	6.67487	0.258513	0.0108891	0.0213178	0.0128901	0.0213178
CSNK1E	ENST00000396832.6	1.77493e-05	0.00101058	1.08642	0.253158	6.96049	0.294731	0.0607839	0.0353495	0.0117359	0.0353495
TMEM243	ENST00000433078.5	1.78564e-05	0.0010158	0.734856	0.17129	5.43115	0.126968	0.0205114	0.004732	0.0234988	0.0234988
TMCC2	ENST00000358024.8	1.81513e-05	0.00102816	0.730025	0.170308	5.62219	0.153481	0.0117861	0.0317212	0.0208691	0.0317212
PTPRK	ENST00000368210.7	1.81377e-05	0.00102816	4.24888	0.991187	3.41729	6.01676	1.23261	0.241069	0.166333	0.241069
PTPRK	ENST00000625760.2	1.81377e-05	0.00102816	4.24888	0.991187	3.41729	6.01676	1.23261	0.241069	0.166333	0.241069
FOXN3	ENST00000555353.5	1.81909e-05	0.00102942	4.19649	0.979114	3.31826	5.57386	0.868391	0.569604	0.188426	0.569604
SRGAP2B	ENST00000641863.1	1.83984e-05	0.00103771	0.927123	0.216441	5.99057	0.21574	0.0144924	0.0557776	0.0169236	0.0557776
TUNAR	ENST00000503525.2	1.84721e-05	0.00103883	0.692428	0.161684	7.07051	0.148823	0.00913086	0.0300817	0.0113742	0.0300817
MON1B	ENST00000545553.1	1.85032e-05	0.00103897	4.49984	1.05082	2.76284	4.85628	1.295	-0.849904	0.361325	0.361325
GABPB1	ENST00000359031.8	1.85451e-05	0.00103978	1.19867	0.279949	4.91453	0.408314	0.0567198	0.0608377	0.0323994	0.0608377
NCOR2	ENST00000542565.1	1.88064e-05	0.00105265	0.93519	0.218573	4.61734	0.275393	0.0304623	0.00631775	0.0411992	0.0411992
ILVBL	ENST00000263383.8	1.89369e-05	0.00105727	0.72803	0.170217	6.29216	0.134866	0.0216101	0.0218507	0.0148273	0.0218507
PANK2	ENST00000610179.5	1.9212e-05	0.00106902	0.972934	0.227648	6.1674	0.237766	0.0266501	0.0510852	0.0156085	0.0510852
DOT1L	ENST00000457590.2	1.92294e-05	0.00106909	0.585856	0.137086	5.89177	0.150234	0.00590153	0.0222871	0.0177956	0.0222871
GSTO2	ENST00000450629.6	1.96615e-05	0.00108816	1.0685	0.250311	4.63585	0.281413	0.0534747	0.0148223	0.0405084	0.0405084
CNN3	ENST00000394202.8	1.96712e-05	0.00108816	0.656479	0.153793	5.71121	0.145008	0.0157556	-0.0015979	0.0197228	0.0197228
SARS2	ENST00000221431.10	1.97241e-05	0.00108927	0.624222	0.146257	6.005	0.0948435	0.0152812	0.0104456	0.0168053	0.0168053
SARS2	ENST00000634687.1	1.97241e-05	0.00108927	0.624222	0.146257	6.005	0.0948435	0.0152812	0.0104456	0.0168053	0.0168053
RNF187	ENST00000305943.8	2.04096e-05	0.00111965	0.84213	0.197666	5.98038	0.17879	0.0139305	0.0446774	0.0170085	0.0446774
TARS1	ENST00000508361.5	2.03917e-05	0.00111965	0.657146	0.154239	7.45824	0.112078	0.0252596	0.000174901	0.0104251	0.0104251
RNF187	ENST00000643372.2	2.04096e-05	0.00111965	0.84213	0.197666	5.98038	0.17879	0.0139305	0.0446774	0.0170085	0.0446774
DUSP8	ENST00000397374.8	2.08397e-05	0.00114041	4.20448	0.987964	2.8946	4.97563	0.777214	0.686895	0.315104	0.686895
RMND5B	ENST00000313386.9	2.09592e-05	0.001146	0.610724	0.143551	6.65095	0.1022	0.00601042	0.0248997	0.0129986	0.0248997
CCDC92B	ENST00000575506.3	2.24476e-05	0.00121885	0.862442	0.203452	4.47335	0.156636	0.0146302	0.000905667	0.047459	0.047459
PAXX	ENST00000371620.4	2.24674e-05	0.00121885	0.698328	0.164745	5.25446	0.150731	0.0146315	-0.00544037	0.0260798	0.0260798
SLC16A10	ENST00000612036.4	2.25551e-05	0.00122015	0.946635	0.22337	4.54454	0.237561	0.0306845	0.0288622	0.0441567	0.0441567
BSPRY	ENST00000374183.5	2.2671e-05	0.00122538	0.630072	0.148713	5.23466	0.0933201	0.00678573	0.0183687	0.0263878	0.0263878
ERF	ENST00000440177.6	2.27316e-05	0.00122569	1.23734	0.292086	5.91686	0.392824	0.110408	-0.07164	0.0175634	0.0175634
SNX25	ENST00000652585.1	2.28131e-05	0.00122808	1.40942	0.33277	4.89533	0.530783	0.133257	-0.0835963	0.0328473	0.0328473
YIPF2	ENST00000586748.5	2.32541e-05	0.00124576	0.593037	0.140161	6.04816	0.108617	0.0130037	0.00926232	0.016464	0.016464
GSTT2B	ENST00000290765.8	2.44632e-05	0.00129687	1.09785	0.260174	4.98459	0.31325	0.0147767	0.0867589	0.0308677	0.0867589
ARID1B	ENST00000637741.1	2.57985e-05	0.00135248	5.15449	1.22501	3.1143	8.54938	2.00738	-1.76003	0.243613	0.243613
MYEF2	ENST00000561151.1	2.5916e-05	0.00135649	4.92504	1.17077	1.88921	6.12235	0.901679	1.15437	0.802354	1.15437
AXL	ENST00000359092.7	2.60512e-05	0.00136141	0.875726	0.208234	5.54046	0.259939	0.0390173	0.0260246	0.0219883	0.0260246
TSPO	ENST00000337554.8	2.66729e-05	0.00138879	0.75558	0.179893	4.92974	0.149675	0.0164889	0.0137784	0.0320535	0.0320535
SPTAN1	ENST00000372731.8	2.83194e-05	0.0014558	4.56501	1.09039	2.89061	4.7652	1.46695	-1.16104	0.31648	0.31648
NUDT14	ENST00000392568.7	2.89446e-05	0.00148277	0.617487	0.147667	5.29301	0.0934568	0.00721526	0.00534019	0.0254931	0.0254931
RBMS1	ENST00000409972.5	2.89686e-05	0.00148277	1.1583	0.27701	5.20253	0.37091	0.0340083	0.0810933	0.0268991	0.0810933
RELA	ENST00000308639.13	2.93487e-05	0.00149362	4.23344	1.01316	2.08037	4.64968	0.856056	-0.431126	0.683675	0.683675
CLIC6	ENST00000349499.2	3.01881e-05	0.00152929	0.637985	0.152919	5.14652	0.129422	0.0072488	0.00923677	0.0278276	0.0278276
TAMM41	ENST00000624386.3	3.06217e-05	0.00154387	4.8954	1.1743	2.30293	5.33928	1.50592	-1.28027	0.562533	0.562533
SPPL2B	ENST00000610743.4	3.07444e-05	0.00154681	0.627502	0.150557	5.65298	0.13189	0.013545	0.00692687	0.0204559	0.0204559
PAWR	ENST00000550006.1	3.11163e-05	0.00156314	3.58526	0.860778	2.31875	3.63841	0.556904	0.20294	0.554503	0.554503
MTLN	ENST00000611969.4	3.13482e-05	0.00157015	0.633583	0.152178	5.11806	0.0908659	0.00641663	0.0082166	0.0283204	0.0283204
AC110079.1	ENST00000567913.2	3.15636e-05	0.00157842	0.638128	0.153327	5.82593	0.103396	0.00334638	0.0319173	0.0184435	0.0319173
SYNE1	ENST00000409694.6	3.17959e-05	0.00158764	3.9969	0.960745	3.12256	5.06739	0.917026	0.46752	0.241142	0.46752
PIF1	ENST00000268043.8	3.21395e-05	0.00160237	0.587671	0.141343	7.50816	0.0886633	0.00625066	0.0237163	0.010337	0.0237163
PRDM5	ENST00000394435.2	3.31359e-05	0.00163847	0.872923	0.210304	4.43706	0.194355	0.0154683	0.0508733	0.0493074	0.0508733
GADD45G	ENST00000252506.11	3.341e-05	0.0016459	1.32851	0.320209	5.61156	0.530833	0.00636006	0.147441	0.0210147	0.147441
POLR1D	ENST00000302979.4	3.3582e-05	0.00165114	0.689299	0.166188	5.34084	0.184668	0.015276	0.0261517	0.0247862	0.0261517
TMEM145	ENST00000301204.8	3.49424e-05	0.00170546	0.741108	0.179072	4.72933	0.154343	0.0107493	0.0241027	0.0373509	0.0373509
C1orf94	ENST00000373374.7	3.49548e-05	0.00170546	0.647592	0.156479	5.80032	0.106392	0.00334794	0.0333806	0.0187116	0.0333806
TRPT1	ENST00000317459.11	3.56153e-05	0.00173131	0.810676	0.196089	5.18652	0.142015	0.030517	-0.010693	0.0271594	0.0271594
TRIM28	ENST00000253024.10	3.68359e-05	0.00178052	0.809297	0.196123	8.42539	0.18491	0.00308529	0.0546109	0.00994253	0.0546109
JAG2	ENST00000331782.8	3.69272e-05	0.00178329	0.664767	0.16112	5.2293	0.110642	0.0124674	0.0177795	0.0264721	0.0264721
WASH9P	ENST00000623083.4	3.7261e-05	0.00179678	0.645286	0.156477	5.54048	0.110632	0.0147394	0.00535085	0.0219881	0.0219881
PLEKHG3	ENST00000471182.6	3.73273e-05	0.0017971	0.720788	0.174803	6.16345	0.191041	0.0170376	0.0287965	0.0156349	0.0287965
BCL2L1	ENST00000422920.1	3.7349e-05	0.0017971	0.603491	0.146361	5.45368	0.0727054	0.00894798	-0.00306418	0.0231844	0.0231844
ENDOG	ENST00000372642.5	3.77247e-05	0.00180991	0.686774	0.166653	4.92746	0.11335	0.0095549	0.00595091	0.0321048	0.0321048
RBSN	ENST00000476527.6	3.79228e-05	0.0018181	5.18141	1.25769	2.56615	6.10116	1.9337	-1.42998	0.438977	0.438977
TRAF1	ENST00000540010.1	3.96491e-05	0.00188177	4.16422	1.01331	2.00927	4.17136	0.814006	-0.741734	0.726193	0.726193
SNX18	ENST00000326277.5	3.99864e-05	0.0018937	4.252	1.03516	3.07288	5.03291	0.185704	1.42164	0.256281	1.42164
AMOTL2	ENST00000249883.9	4.102e-05	0.00193627	1.17228	0.285807	6.97814	0.332436	0.110853	-0.0187099	0.0116749	0.0116749
TMED7	ENST00000508420.1	4.11363e-05	0.00193787	3.54732	0.864989	1.95257	4.30344	0.360825	-0.0502289	0.761485	0.761485
PEX16	ENST00000532681.5	4.12234e-05	0.00193979	0.620863	0.151411	5.57328	0.0980727	0.00789601	0.0264919	0.0215389	0.0264919
POU6F2	ENST00000517348.1	4.19391e-05	0.00195676	0.844077	0.206047	4.4832	0.186006	0.0167062	0.0332262	0.0469767	0.0469767
SEL1L3	ENST00000399878.8	4.23708e-05	0.00196857	0.797773	0.194856	6.59087	0.203183	0.0435903	0.0133633	0.0132762	0.0133633
SMAP2	ENST00000372718.8	4.23674e-05	0.00196857	0.794535	0.194065	5.43209	0.227829	0.0330061	0.01251	0.0234855	0.0234855
CDC42EP1	ENST00000249014.5	4.32358e-05	0.00199754	1.0785	0.263725	6.29206	0.298829	0.00233658	0.10199	0.0148279	0.10199
MLST8	ENST00000397124.5	4.35387e-05	0.00201004	0.629018	0.153875	6.46769	0.122547	0.021642	-0.00541337	0.0138743	0.0138743
FBRSL1	ENST00000542306.5	4.38219e-05	0.00201758	0.587751	0.143833	5.52927	0.0719107	0.00889007	0.000606914	0.0221418	0.0221418
TOR4A	ENST00000357503.3	4.4828e-05	0.00204963	0.745929	0.182778	5.73414	0.153057	0.00430388	0.0458076	0.0194504	0.0458076
ATXN2L	ENST00000340394.12	4.48929e-05	0.00205118	0.772298	0.189254	7.52237	0.154101	0.0103885	0.0433374	0.0103132	0.0433374
IER2	ENST00000292433.4	4.49832e-05	0.00205248	0.649526	0.159187	7.57482	0.109088	0.000971506	0.0370393	0.0102306	0.0370393
AIF1L	ENST00000372309.7	4.5431e-05	0.00207139	0.979089	0.240092	5.39353	0.315743	0.0624376	0.0113671	0.0240289	0.0240289
SCRIB	ENST00000612204.4	4.59522e-05	0.00208798	0.940573	0.230798	6.56293	0.215676	0.0664933	-0.000946403	0.013408	0.013408
NA	ENST00000627489.1	4.62459e-05	0.00209851	3.51197	0.862081	1.83676	3.72799	0.277465	-0.187171	0.83731	0.83731
CADM1	ENST00000331581.10	4.65213e-05	0.00210885	3.61367	0.887346	2.63566	3.66391	0.770997	0.184778	0.410077	0.410077
COL9A1	ENST00000644493.1	4.75392e-05	0.00214597	4.48083	1.10164	2.23471	5.17145	1.22245	-0.764348	0.597984	0.597984
LONP1	ENST00000360614.7	4.79241e-05	0.00215985	0.760406	0.187037	6.67797	0.152593	0.0158974	0.0365771	0.0128761	0.0365771
NA	ENST00000613283.2	4.81638e-05	0.00216918	1.19506	0.294034	5.58561	0.345952	0.108313	-0.0210083	0.0213702	0.0213702
PMEPA1	ENST00000395814.5	4.82155e-05	0.00217003	1.10816	0.272669	4.13111	0.429317	0.0415457	0.0502631	0.0699771	0.0699771
SPINT1	ENST00000563656.5	4.87572e-05	0.00219142	0.716975	0.176529	5.40186	0.146635	0.0172094	0.0295345	0.0239109	0.0295345
RHBDD3	ENST00000216085.12	4.89354e-05	0.00219645	0.703416	0.173227	6.02887	0.231302	0.00740956	0.037602	0.0166143	0.037602
GPRC5C	ENST00000652294.1	4.89792e-05	0.00219693	0.794399	0.195643	5.48084	0.170935	0.0165532	0.0408612	0.0228081	0.0408612
DUSP22	ENST00000344450.9	4.94129e-05	0.00221338	0.740753	0.182524	4.87453	0.179824	0.0166246	0.00354316	0.0333479	0.0333479
HLA-C	ENST00000639886.1	5.05417e-05	0.00225326	4.54432	1.12119	2.27038	5.01323	1.30633	-1.21872	0.57928	0.57928
ATG4D	ENST00000588857.5	5.08985e-05	0.00226557	4.61546	1.13921	1.7016	5.47127	0.301505	1.64519	0.931934	1.64519
TARBP2	ENST00000550147.5	5.18593e-05	0.00229807	5.35019	1.32199	2.54161	6.14749	2.17191	-2.07105	0.449561	0.449561
DYNC1LI1	ENST00000474077.1	5.21035e-05	0.00230426	1.55417	0.384126	3.69454	0.803576	0.10213	-0.0528017	0.1192	0.1192
HDAC10	ENST00000216271.10	5.22392e-05	0.00230872	0.603935	0.14929	5.2822	0.0851711	0.00777547	0.0139435	0.0256559	0.0256559
RASD1	ENST00000225688.4	5.24181e-05	0.00231508	0.941596	0.232805	4.37024	0.223085	0.0282765	0.00568826	0.0530204	0.0530204
RALY	ENST00000375114.7	5.37041e-05	0.00236555	0.867471	0.214779	5.46936	0.231089	0.0462284	-0.00748605	0.0229669	0.0229669
AURKAIP1	ENST00000338338.9	5.42845e-05	0.00238794	0.649421	0.160892	6.32097	0.122454	0.00644579	0.0323837	0.0146606	0.0323837
AXIN2	ENST00000307078.10	5.46492e-05	0.0024015	0.836078	0.207217	6.91852	0.267065	0.0100578	0.0543503	0.0118856	0.0543503
LZTR1	ENST00000495142.6	5.48574e-05	0.00240674	3.89827	0.966377	1.78565	3.588	0.528492	-0.38525	0.872335	0.872335
ISG15	ENST00000649529.1	5.59413e-05	0.00244295	0.589746	0.146364	5.3659	0.0785257	0.00771014	0.0097741	0.0244235	0.0244235
MTA1	ENST00000469140.2	5.60793e-05	0.00244737	0.839785	0.208449	4.48314	0.177046	0.0181968	0.021523	0.0469798	0.0469798
FBXW4	ENST00000331272.8	5.66937e-05	0.00246767	0.741046	0.184057	5.96585	0.211971	0.00470024	0.0461155	0.0171314	0.0461155
ITGA5	ENST00000293379.9	5.72884e-05	0.00248709	0.619835	0.154046	7.18731	0.0988223	0.000840036	0.0347551	0.0110368	0.0347551
TGIF2	ENST00000373872.8	5.75831e-05	0.00249489	0.587142	0.145964	6.87609	0.122163	0.0199146	0.00204049	0.0120438	0.0120438
MED15	ENST00000263205.11	5.81649e-05	0.00251516	0.639805	0.15915	6.33665	0.0965967	0.0234214	-0.0125746	0.0145718	0.0145718
FAM83E	ENST00000263266.3	5.94374e-05	0.00256014	1.05483	0.26272	4.01763	0.341082	0.0232315	0.0304811	0.0803011	0.0803011
LTBP4	ENST00000595118.5	5.98215e-05	0.00257334	0.741466	0.184742	5.58541	0.136595	0.0298217	-0.018051	0.0213729	0.0213729
AC092299.1	ENST00000632679.1	6.18454e-05	0.00263967	0.855335	0.213532	5.01654	0.182135	0.0381759	0.00131704	0.0302179	0.0302179
DCTN1	ENST00000409240.5	6.19232e-05	0.00263971	0.89288	0.222921	7.56376	0.186065	0.0642935	-0.0195777	0.0102473	0.0102473
SLC30A3	ENST00000233535.8	6.19668e-05	0.00263987	0.660194	0.164835	5.26469	0.144804	0.00905906	0.0316966	0.0259224	0.0316966
PHF1	ENST00000495185.5	6.23966e-05	0.00265477	0.915937	0.228781	4.84563	0.338819	0.0444402	-0.0230608	0.0340708	0.0340708
SEPTIN8	ENST00000296873.11	6.33795e-05	0.00268967	0.586076	0.146524	7.1519	0.115651	0.0210697	0.00360526	0.0111342	0.0111342
SLC8B1	ENST00000552014.5	6.45737e-05	0.00272635	0.587503	0.147043	5.7128	0.0778721	0.012729	0.00163765	0.0197036	0.0197036
MAGEA2	ENST00000623806.3	6.47586e-05	0.00272894	0.755282	0.189068	6.11234	0.164473	0.0376315	0.0056723	0.0159886	0.0159886
PHLDA1	ENST00000619060.1	6.48218e-05	0.00272986	1.89578	0.474595	6.67177	0.864348	0.324956	-0.0743083	0.0129041	0.0129041
PHLDB3	ENST00000292140.9	6.54751e-05	0.00275037	0.838148	0.209949	4.64276	0.162294	0.0258612	0.00989016	0.0402565	0.0402565
SLC3A2	ENST00000377889.6	6.57066e-05	0.00275659	0.763929	0.191398	6.02306	0.151544	0.026776	0.0281736	0.0166602	0.0281736
ZXDC	ENST00000389709.8	6.61484e-05	0.00276986	0.620686	0.155571	5.52109	0.0964551	0.0140495	0.0170664	0.022254	0.022254
CDK13	ENST00000340829.10	7.0519e-05	0.0029251	0.600504	0.151088	6.5276	0.15506	0.00854517	0.0256962	0.0135777	0.0256962
OAZ1	ENST00000581150.6	7.25167e-05	0.00299856	0.979335	0.246816	5.41026	0.267394	0.0342426	0.0571346	0.0237922	0.0571346
SLC3A2	ENST00000338663.11	7.28372e-05	0.00300512	0.86396	0.217796	8.19727	0.204753	0.00143423	0.0697187	0.00982929	0.0697187
HNRNPDL	ENST00000349655.8	7.39642e-05	0.0030451	1.16591	0.294188	6.79297	0.357313	0.0110765	0.118743	0.0123742	0.118743
KDM5B	ENST00000367264.7	7.56588e-05	0.00309369	0.917371	0.231791	7.07799	0.214464	0.0692395	0.00596111	0.0113512	0.0113512
CHCHD10	ENST00000401675.7	7.5952e-05	0.00309993	0.691189	0.174683	4.83677	0.105886	0.0114719	0.00522189	0.0342991	0.0342991
CHCHD10	ENST00000620558.3	7.5952e-05	0.00309993	0.691189	0.174683	4.83677	0.105886	0.0114719	0.00522189	0.0342991	0.0342991
DEF6	ENST00000316637.7	7.76404e-05	0.00314555	0.679358	0.171921	4.89317	0.149017	0.00839255	0.0359427	0.0328986	0.0359427
PKD1P1	ENST00000458669.1	7.87303e-05	0.00317609	0.61823	0.156584	6.70702	0.12878	0.0059731	0.0308048	0.0127455	0.0308048
OTUB2	ENST00000617748.3	7.87192e-05	0.00317609	4.77662	1.2098	1.86475	5.9893	0.7095	1.48593	0.81853	1.48593
NFE2L1	ENST00000362042.8	7.97892e-05	0.00321489	0.661823	0.167761	7.88878	0.184195	0.0121996	0.0300161	0.00989736	0.0300161
PLPP2	ENST00000591572.2	7.99555e-05	0.00321963	3.85376	0.976987	1.84143	3.78776	0.597596	-0.367997	0.83416	0.83416
SPPL2A	ENST00000560288.1	8.29969e-05	0.00332994	3.09992	0.787666	2.34363	3.22497	0.275759	0.654868	0.542024	0.654868
NPTN	ENST00000351217.10	8.3406e-05	0.00334028	0.625558	0.158997	6.02353	0.13864	0.0212637	0.004262	0.0166565	0.0166565
ITM2B	ENST00000378549.5	8.3503e-05	0.00334214	1.25449	0.318875	5.18887	0.380792	0.125401	-0.0739061	0.0271209	0.0271209
ANKRD30BL	ENST00000470729.5	8.37583e-05	0.00335033	1.39869	0.355596	6.46964	0.5095	0.00221688	0.187456	0.0138645	0.187456
SMARCD2	ENST00000448276.6	8.66395e-05	0.00345514	0.752125	0.191612	6.99476	0.154919	0.00697973	0.048093	0.0116185	0.048093
ATXN10	ENST00000476998.5	8.68343e-05	0.00345873	4.24929	1.0827	2.26115	4.7705	1.17428	-1.03303	0.584087	0.584087
SCG2	ENST00000305409.3	8.75799e-05	0.00348214	1.69876	0.433065	3.67134	0.752249	0.0424634	0.238854	0.122583	0.238854
DBNDD2	ENST00000372717.5	8.77403e-05	0.00348643	0.748278	0.19078	5.42821	0.165635	0.0310554	-0.0149012	0.0235399	0.0235399
PCK2	ENST00000216780.8	8.81378e-05	0.00349383	0.851062	0.217046	7.5324	0.208904	0.000512943	0.0701503	0.0102968	0.0701503
PCK2	ENST00000645217.1	8.81378e-05	0.00349383	0.851062	0.217046	7.5324	0.208904	0.000512943	0.0701503	0.0102968	0.0701503
PDCD2	ENST00000167218.9	8.87375e-05	0.00351407	1.11082	0.283408	4.95155	0.344738	0.0889095	-0.0203345	0.0315709	0.0315709
WWP1	ENST00000521079.1	8.87943e-05	0.00351407	4.29744	1.09647	2.00535	4.24576	1.07479	-0.902346	0.728593	0.728593
CACHD1	ENST00000651257.1	8.95767e-05	0.00353815	0.810231	0.206838	7.00166	0.369258	0.00912616	0.0550469	0.0115954	0.0550469
RRM2B	ENST00000522368.5	8.97619e-05	0.00354123	0.868176	0.221659	5.32854	0.239218	0.0487331	-0.0031825	0.024966	0.024966
TGIF1	ENST00000343820.9	9.28777e-05	0.0036446	0.880052	0.225165	5.98858	0.217891	0.0263839	0.0496647	0.01694	0.0496647
SMG6	ENST00000570756.5	9.33268e-05	0.00365571	4.1811	1.07007	3.31623	5.69301	1.07209	0.645481	0.188913	0.645481
SMNDC1	ENST00000471297.1	9.52897e-05	0.00371783	1.32975	0.340761	4.7165	0.469629	0.0318752	0.142302	0.0377542	0.142302
OXCT2	ENST00000327582.5	9.56556e-05	0.00372708	0.80421	0.206136	4.5529	0.211958	0.0194021	0.044336	0.0437965	0.044336
LENG8	ENST00000611878.4	9.63464e-05	0.00374323	0.599882	0.153831	5.46396	0.137299	0.0124543	0.0208034	0.0230417	0.0230417
LENG8	ENST00000619260.4	9.63464e-05	0.00374323	0.599882	0.153831	5.46396	0.137299	0.0124543	0.0208034	0.0230417	0.0230417
NA	ENST00000652215.1	9.6374e-05	0.00374323	1.27015	0.325718	5.07994	0.601599	0.00867219	0.150466	0.0290056	0.150466
DIAPH3	ENST00000267215.8	9.70062e-05	0.00375537	4.19409	1.07597	2.13203	4.72416	1.08257	-0.771826	0.653994	0.653994
HELLS	ENST00000630929.2	9.71107e-05	0.00375722	3.96666	1.01769	2.94736	4.59087	0.415979	1.13757	0.297095	1.13757
EIF4G1	ENST00000475721.5	9.73796e-05	0.00375883	6.24781	1.60322	2.65951	10.3284	0.68859	3.16689	0.400526	3.16689
FBXO7	ENST00000420700.5	9.7671e-05	0.00376788	0.799618	0.205225	5.04907	0.130933	0.0335919	-0.0225812	0.0295838	0.0295838
TSNARE1	ENST00000519651.5	9.85727e-05	0.00380045	0.644684	0.165555	4.93682	0.111648	0.0092176	0.0281867	0.0318951	0.0318951
SSBP4	ENST00000270061.12	0.000100039	0.00384578	0.599833	0.154179	5.85697	0.094936	0.017526	-0.000526437	0.0181308	0.0181308
KCNJ11	ENST00000339994.4	0.000101108	0.00387706	0.731337	0.188105	4.98481	0.183794	0.022212	-0.00335677	0.0308632	0.0308632
FAM71E1	ENST00000600100.5	0.000104107	0.00397674	0.887293	0.228636	4.40613	0.304161	0.0274365	-0.0202779	0.0509749	0.0509749
TLK2	ENST00000326270.13	0.000105234	0.00401516	0.965698	0.249007	5.51808	0.224427	0.0707115	-0.0105718	0.0222953	0.0222953
KMT5B	ENST00000405515.5	0.000105739	0.0040308	0.861787	0.22228	5.89602	0.204608	0.056357	-0.0477938	0.0177556	0.0177556
RPRML	ENST00000322329.5	0.000106601	0.00405555	1.3309	0.343453	3.5544	0.3671	0.0360291	0.00368784	0.140911	0.140911
ZFYVE27	ENST00000359980.5	0.000108196	0.00409982	0.712553	0.184054	5.73239	0.131963	0.031343	-0.0126598	0.0194708	0.0194708
GATAD2A	ENST00000609040.5	0.000109985	0.00415432	0.725438	0.187576	5.99157	0.138452	0.0125612	0.0402158	0.0169153	0.0402158
CHST13	ENST00000319340.6	0.000110623	0.00417027	0.997234	0.257948	4.15315	0.26722	0.0316534	0.023112	0.0681524	0.0681524
ARHGAP44	ENST00000580768.5	0.000111739	0.00420693	4.17205	1.07984	3.28656	5.55231	1.19164	0.557452	0.196166	0.557452
ZSWIM4	ENST00000590508.5	0.0001125	0.00421938	0.656625	0.170026	5.08807	0.122532	0.0145062	-0.00127783	0.0288569	0.0288569
EHMT2	ENST00000440987.5	0.00011241	0.00421938	3.77226	0.976734	2.74772	4.53517	1.06417	-0.0903681	0.366841	0.366841
EHMT2	ENST00000454705.5	0.00011241	0.00421938	3.77226	0.976734	2.74772	4.53517	1.06417	-0.0903681	0.366841	0.366841
RARG	ENST00000338561.9	0.000112686	0.00422333	0.603018	0.156161	5.55565	0.0985154	0.0125274	0.0240519	0.0217803	0.0240519
AJUBA	ENST00000553592.5	0.000113294	0.00423714	4.15448	1.07623	1.89396	4.10716	0.938177	-0.556777	0.799241	0.799241
KCNN1	ENST00000222249.13	0.000114569	0.00426556	0.665262	0.172461	5.26864	0.125864	0.0098789	0.0347352	0.025862	0.0347352
SPPL2B	ENST00000613503.5	0.00011588	0.00429626	0.747724	0.193978	5.3003	0.186169	0.0166086	0.0398327	0.0253839	0.0398327
PINK1	ENST00000321556.5	0.000119784	0.00442979	0.586492	0.152472	6.72602	0.102631	0.00328373	0.0315876	0.0126609	0.0315876
SH2D3A	ENST00000597687.1	0.000121094	0.00446575	1.20377	0.313163	4.60096	0.457164	0.0212448	0.125862	0.0418303	0.125862
ACIN1	ENST00000338631.10	0.000121517	0.00447637	0.717807	0.186781	6.60111	0.137351	0.0380679	0.0142627	0.0132283	0.0142627
GABRB3	ENST00000622697.4	0.000124921	0.00456783	4.59122	1.19679	2.96517	5.54329	1.85736	-1.42194	0.291113	0.291113
NA	ENST00000614010.5	0.000125537	0.00458615	0.762278	0.198766	5.36346	0.157447	0.0348032	0.023519	0.0244586	0.0244586
SUPT20H	ENST00000350612.11	0.000125753	0.00459152	0.639118	0.16667	6.2944	0.108105	0.0268542	0.0136158	0.0148142	0.0148142
ERO1A	ENST00000629528.2	0.000126502	0.00461122	3.85074	1.00458	2.65451	4.44532	1.11127	-0.449932	0.402513	0.402513
UBE3A	ENST00000566215.5	0.000127898	0.00465698	4.82636	1.25999	3.24441	5.89949	2.17443	-0.803939	0.206945	0.206945
C17orf107	ENST00000381365.4	0.000128857	0.00467903	0.832268	0.21738	5.00151	0.379787	0.00943252	0.0614485	0.0305201	0.0614485
VGLL4	ENST00000418000.5	0.000128773	0.00467903	3.57981	0.934971	1.75311	3.48729	0.416143	-0.262593	0.895114	0.895114
EPG5	ENST00000590854.5	0.000129229	0.0046874	4.97572	1.29985	2.63432	6.24476	2.1238	-1.90945	0.410617	0.410617
TNRC18	ENST00000430969.5	0.000129578	0.00469507	5.09619	1.33155	4.15462	7.92129	2.2583	0.401241	0.0680326	0.401241
CHRM3	ENST00000615928.4	0.000130602	0.00472423	0.667477	0.174489	5.00889	0.114107	0.0152988	0.0226895	0.0303709	0.0303709
SYT3	ENST00000600079.6	0.00013095	0.00472643	0.634379	0.165865	5.58889	0.116013	0.0199416	0.00322246	0.0213253	0.0213253
SH2D3A	ENST00000245908.11	0.00013231	0.00476517	0.999259	0.261441	5.83873	0.28738	0.0127343	0.0897929	0.0183129	0.0897929
SLC51A	ENST00000296327.10	0.000132818	0.00477838	0.951399	0.248981	4.27659	0.258406	0.0340438	-0.00500922	0.0589434	0.0589434
OSBPL2	ENST00000642516.1	0.000134974	0.00482698	4.0927	1.07217	2.07212	4.55926	1.03582	-0.694881	0.688509	0.688509
NEO1	ENST00000261908.11	0.0001355	0.00483794	0.642992	0.168488	6.42877	0.131212	0.0285087	-0.00404024	0.0140738	0.0140738
BAD	ENST00000309032.7	0.000136943	0.00488418	0.645906	0.169368	5.15016	0.105412	0.0152626	0.0103048	0.0277657	0.0277657
AC115223.1	ENST00000466377.1	0.00013721	0.00488844	0.88442	0.23194	4.82381	0.275085	0.0127629	0.0679312	0.0346391	0.0679312
ZNF296	ENST00000303809.7	0.000137777	0.00490335	0.736329	0.193155	5.50176	0.184511	0.00720338	0.0487596	0.0225197	0.0487596
MMD	ENST00000571578.1	0.000140819	0.00499816	0.741979	0.194913	4.5937	0.15035	0.0148702	0.0147406	0.0421162	0.0421162
TTC3	ENST00000428693.1	0.000142076	0.00503197	3.77444	0.992093	2.05689	4.38427	0.778868	-0.727617	0.697504	0.697504
PPHLN1	ENST00000395568.6	0.000142746	0.0050476	4.73997	1.24626	1.85908	5.9619	1.50743	0.756575	0.822315	0.822315
PHETA1	ENST00000548163.1	0.000144213	0.0050913	4.94659	1.30145	2.01365	6.61608	1.1724	1.36827	0.723518	1.36827
ENO2	ENST00000541477.5	0.000146993	0.00517359	3.74653	0.986942	3.17618	5.65362	0.758803	0.702278	0.225555	0.702278
SH3BP2	ENST00000511747.6	0.000148468	0.0052082	0.625708	0.164937	5.53188	0.0894599	0.0187003	-4.06091e-05	0.022106	0.022106
MROH1	ENST00000534366.5	0.000150607	0.00525813	4.40317	1.16177	3.06444	5.6866	1.76564	-1.0029	0.258914	0.258914
AXIN2	ENST00000580513.1	0.000150712	0.00525903	0.977968	0.258046	4.12129	0.275934	0.0290734	0.0200519	0.0708085	0.0708085
YAP1	ENST00000615667.4	0.000152377	0.00530594	6.28952	1.66075	2.88817	10.5216	1.78819	2.34893	0.317321	2.34893
PIP4K2A	ENST00000545335.5	0.000153651	0.00533907	4.47532	1.18235	3.69696	6.51209	0.727425	1.36951	0.118851	1.36951
VKORC1L1	ENST00000648187.1	0.000156547	0.00541974	4.65877	1.23233	4.91233	6.22766	2.24552	-0.595157	0.0324501	0.0324501
AC073111.4	ENST00000498682.3	0.000158011	0.00545617	0.964468	0.255277	4.10317	0.300435	0.0253768	0.0183229	0.0723724	0.0723724
ALOX12P2	ENST00000574271.5	0.000159872	0.00550893	3.68552	0.976243	1.67209	3.3053	0.476143	-0.283776	0.953433	0.953433
SHISA5	ENST00000296444.6	0.000160014	0.00551095	0.683705	0.181114	5.9761	0.169945	0.0321591	-0.00553784	0.0170444	0.0170444
SOD3	ENST00000382120.4	0.00016061	0.00552572	0.586461	0.155392	5.22737	0.214303	0.00597569	0.0302445	0.0265026	0.0302445
CALM1	ENST00000626705.2	0.000161482	0.0055442	4.64896	1.23226	4.53929	6.37585	2.23331	-0.0190575	0.0443863	0.0443863
THBS2	ENST00000366787.7	0.000162367	0.0055659	0.630059	0.167064	7.28437	0.106114	0.00917132	0.0326945	0.0107911	0.0326945
RRNAD1	ENST00000368216.9	0.000166488	0.00568067	0.635131	0.168689	5.50409	0.122008	0.0112202	0.031464	0.0224875	0.031464
TEF	ENST00000266304.9	0.000166953	0.00569069	0.734027	0.194992	6.70544	0.239342	0.00148374	0.0555492	0.0127526	0.0555492
UBP1	ENST00000283629.8	0.000175829	0.00592606	0.761177	0.202903	6.60165	0.163695	0.0212061	0.0405484	0.0132258	0.0405484
SLC1A4	ENST00000234256.4	0.000177386	0.00595729	1.18439	0.315902	5.33485	0.423417	0.00924446	0.140447	0.0248736	0.140447
CYBC1	ENST00000306645.10	0.000179857	0.00602195	0.781312	0.208586	6.13268	0.142401	0.0494171	-0.039085	0.0158453	0.0158453
WIZ	ENST00000648664.1	0.000179781	0.00602195	3.82973	1.02239	3.0706	4.79953	1.05157	0.51636	0.256991	0.51636
MELTF	ENST00000296350.10	0.000180326	0.00603207	0.774157	0.206712	4.59496	0.175292	0.011722	0.052373	0.0420664	0.052373
PDLIM4	ENST00000253754.8	0.000180948	0.00604928	1.09784	0.293208	4.0515	0.327615	0.051904	0.0461584	0.0770522	0.0770522
GTF2IRD1	ENST00000265755.7	0.000182355	0.0060871	1.11331	0.297494	6.13012	0.332337	0.0205527	0.112202	0.0158632	0.112202
SLC48A1	ENST00000442218.3	0.000183247	0.00611069	0.594274	0.158852	5.70308	0.115365	0.00428125	0.0335696	0.0198215	0.0335696
HSF1	ENST00000400780.8	0.000183957	0.00611894	0.66214	0.177039	4.9532	0.101924	0.0154792	0.00970421	0.0315349	0.0315349
HSF1	ENST00000643217.1	0.000183957	0.00611894	0.66214	0.177039	4.9532	0.101924	0.0154792	0.00970421	0.0315349	0.0315349
SLC34A2	ENST00000382051.8	0.000184261	0.00612598	0.62897	0.168189	4.96531	0.12413	0.0088505	0.0335806	0.0312739	0.0335806
USP42	ENST00000479544.6	0.000186177	0.00617824	4.11775	1.10187	3.07808	5.02453	1.33008	0.491079	0.254667	0.491079
LPAR3	ENST00000370611.4	0.0001863	0.00617824	0.978028	0.261722	6.02145	0.241836	0.0860742	-0.0151022	0.016673	0.016673
COL23A1	ENST00000390654.8	0.000188192	0.00622539	0.948749	0.254059	4.90539	0.257599	0.0447803	0.0520388	0.032611	0.0520388
SHC2	ENST00000587423.5	0.0001921	0.00631678	3.31339	0.888502	1.53735	3.076	0.128704	0.240224	1.05545	1.05545
MARVELD3	ENST00000567566.1	0.000193063	0.00634079	1.41527	0.37964	3.94827	0.634106	0.128771	0.0157397	0.0874184	0.0874184
TFPI2	ENST00000647793.1	0.000193118	0.00634079	4.01363	1.07666	1.43132	4.13472	0.598463	0.84566	1.14033	1.14033
CD63	ENST00000257857.8	0.000194951	0.00638464	0.859879	0.230811	6.44593	0.314554	0.0273828	0.0525276	0.0139851	0.0525276
NME3	ENST00000219302.7	0.000195625	0.0063977	0.72119	0.193629	5.1603	0.131807	0.0286439	0.00167287	0.0275943	0.0275943
H2BP2	ENST00000449108.1	0.000196771	0.00642566	3.29318	0.884519	1.89856	2.84654	0.377335	-0.062585	0.796227	0.796227
C1orf226	ENST00000458626.4	0.000196901	0.00642672	0.971932	0.261064	6.27275	0.262576	0.00237487	0.099857	0.0149423	0.099857
FXN	ENST00000396366.6	0.000197944	0.00644171	0.698951	0.187808	4.96448	0.117097	0.021616	0.0123771	0.0312917	0.0312917
CASZ1	ENST00000344008.5	0.000203436	0.00658158	0.935323	0.251789	4.50969	0.203147	0.0493754	-0.00902	0.0457211	0.0457211
ASPHD1	ENST00000483405.5	0.000203701	0.00658695	0.864442	0.232729	4.56333	0.16722	0.0378891	-0.0142719	0.0433548	0.0433548
C9orf72	ENST00000644136.1	0.000203932	0.00659117	3.65057	0.982896	2.91771	4.40075	0.647478	0.801648	0.30717	0.801648
SYNGAP1	ENST00000293748.9	0.000205805	0.00663551	0.7256	0.195486	5.27557	0.216511	0.0315655	-0.0140519	0.0257564	0.0257564
TMC4	ENST00000619895.4	0.000206896	0.00666095	3.61632	0.974632	3.00584	4.69861	0.744846	0.680014	0.277671	0.680014
DVL1	ENST00000632445.1	0.000206773	0.00666095	0.828868	0.223379	4.61192	0.184884	0.0334411	0.0206796	0.0414059	0.0414059
PAK4	ENST00000593480.5	0.000207457	0.00667577	4.33896	1.16961	1.67917	5.16153	0.890374	1.1616	0.948242	1.1616
SEMA3F	ENST00000450338.5	0.000216296	0.00687656	1.42479	0.385164	4.34683	0.519318	0.168107	0.0163991	0.05442	0.05442
GAL3ST1	ENST00000406361.6	0.000220821	0.00699356	3.37781	0.914425	2.61902	3.72114	0.617439	0.63682	0.416848	0.63682
AHDC1	ENST00000642245.1	0.000221508	0.00701194	1.04629	0.283306	5.77976	0.305201	0.10146	-0.00499015	0.0189339	0.0189339
OSBPL7	ENST00000007414.8	0.000224016	0.00707393	0.671944	0.182085	5.03703	0.116203	0.0199173	0.0215698	0.0298153	0.0298153
AL391987.2	ENST00000605259.2	0.000224735	0.00708697	1.10315	0.299001	3.8045	0.276417	0.0298277	0.0272781	0.104275	0.104275
DHRS13	ENST00000378895.9	0.000225783	0.00711323	0.615716	0.166939	5.77642	0.117464	0.0195834	0.0222195	0.0189706	0.0222195
SIPA1	ENST00000534313.6	0.000227415	0.00713408	0.752189	0.204042	6.1737	0.173486	0.0273849	0.035065	0.0155664	0.035065
INTU	ENST00000503952.5	0.000227269	0.00713408	3.43068	0.930581	3.25124	3.16537	1.09381	0.026761	0.205162	0.205162
XIAP	ENST00000355640.3	0.000228153	0.00714367	4.77533	1.29567	2.475	5.77746	2.03886	-1.86397	0.479278	0.479278
NCOR2	ENST00000356219.7	0.00022839	0.00714772	4.76162	1.29204	5.53	8.1745	1.31455	1.1895	0.0221318	1.1895
STC2	ENST00000519511.1	0.000230966	0.00720189	1.55503	0.422276	5.00637	0.673409	0.237054	-0.0900926	0.0304217	0.0304217
WDR86	ENST00000334493.10	0.0002311	0.00720189	4.22582	1.14759	2.31122	4.70121	1.41713	-1.35835	0.558315	0.558315
NME2	ENST00000503064.5	0.000233824	0.00726622	0.733046	0.199232	6.44082	0.182843	0.0247002	0.03484	0.0140114	0.03484
CTSB	ENST00000530640.6	0.000235337	0.00729953	3.83586	1.043	3.13258	5.00448	0.787637	0.844143	0.238166	0.844143
RADIL	ENST00000399583.3	0.000235699	0.00730734	0.623932	0.16967	5.03625	0.091185	0.0133516	0.0107196	0.0298304	0.0298304
FAM189B	ENST00000350210.6	0.000236655	0.00731945	3.71729	1.01115	2.25438	4.23282	0.946021	-0.415072	0.587625	0.587625
ATF3	ENST00000465155.5	0.000236754	0.00731945	0.862867	0.234718	4.5338	0.20647	0.0170174	0.0656217	0.0446285	0.0656217
FCHO2	ENST00000508431.1	0.00023675	0.00731945	3.84169	1.04502	1.70826	3.32627	0.710983	-0.658428	0.927118	0.927118
FAM189B	ENST00000574749.5	0.000236655	0.00731945	3.71729	1.01115	2.25438	4.23282	0.946021	-0.415072	0.587625	0.587625
MRM2	ENST00000467199.5	0.000237323	0.00733362	0.776622	0.211293	5.31191	0.157362	0.041756	0.0110191	0.0252111	0.0252111
H4C14	ENST00000578186.2	0.000237912	0.00734841	1.55702	0.423688	4.2637	0.657761	0.074308	0.194959	0.0598276	0.194959
ECHDC3	ENST00000379215.9	0.000239738	0.00738756	0.591548	0.161054	5.62813	0.138165	0.00491299	0.0339946	0.0207879	0.0339946
NAP1L1	ENST00000547704.5	0.000240732	0.00740782	4.0463	1.10196	4.6766	5.57252	0.605882	1.21558	0.0390673	1.21558
HACD3	ENST00000562832.1	0.000241872	0.00743252	3.854	1.04993	2.97677	4.66321	1.36629	0.138073	0.287247	0.287247
SLC25A15	ENST00000478827.1	0.000243698	0.00746756	0.991836	0.270344	4.06924	0.29728	0.0342206	0.0233489	0.0754082	0.0754082
AL732372.3	ENST00000514436.1	0.000243802	0.00746756	0.751059	0.204722	4.72652	0.150257	0.0254278	0.0290184	0.0374386	0.0374386
PKMYT1	ENST00000262300.13	0.000246031	0.00751659	0.894937	0.244094	5.85536	0.241576	0.0345784	0.0547946	0.0181468	0.0547946
GPM6B	ENST00000493085.5	0.000247958	0.00753706	4.44914	1.21417	1.67208	5.15941	1.25787	0.61327	0.953435	0.953435
PDK3	ENST00000568479.2	0.000248008	0.00753706	4.40135	1.20114	4.54153	8.04776	1.7617	0.402404	0.0442883	0.402404
SLC25A29	ENST00000556715.6	0.000263871	0.00791311	1.47789	0.405078	4.09112	0.50982	0.172697	-0.144446	0.0734351	0.0734351
SNHG32	ENST00000375638.7	0.00026397	0.00791311	1.00096	0.274362	5.30951	0.272648	0.00321105	0.109701	0.0252468	0.109701
SNHG32	ENST00000433752.6	0.00026397	0.00791311	1.00096	0.274362	5.30951	0.272648	0.00321105	0.109701	0.0252468	0.109701
SNHG32	ENST00000423640.6	0.00026397	0.00791311	1.00096	0.274362	5.30951	0.272648	0.00321105	0.109701	0.0252468	0.109701
SNHG32	ENST00000414434.6	0.00026397	0.00791311	1.00096	0.274362	5.30951	0.272648	0.00321105	0.109701	0.0252468	0.109701
SNHG32	ENST00000383383.6	0.00026397	0.00791311	1.00096	0.274362	5.30951	0.272648	0.00321105	0.109701	0.0252468	0.109701
TPD52L2	ENST00000474176.2	0.000264661	0.00791948	0.744975	0.204235	5.63587	0.162224	0.00667344	0.0558943	0.0206832	0.0558943
CPSF1	ENST00000620219.4	0.000264568	0.00791948	0.856059	0.234683	5.63432	0.207963	0.0508207	0.0317933	0.020704	0.0317933
CPSF1	ENST00000643746.1	0.000264568	0.00791948	0.856059	0.234683	5.63432	0.207963	0.0508207	0.0317933	0.020704	0.0317933
PRXL2B	ENST00000626354.2	0.000266621	0.00795653	4.59344	1.25995	1.86043	5.89052	1.1494	1.23179	0.821414	1.23179
PRXL2B	ENST00000378424.9	0.000266621	0.00795653	4.59344	1.25995	1.86043	5.89052	1.1494	1.23179	0.821414	1.23179
C4orf48	ENST00000409248.8	0.000270718	0.00805699	1.13469	0.311573	3.79965	0.454012	0.0407211	0.0304561	0.104895	0.104895
MDFI	ENST00000419164.6	0.000271513	0.00806614	1.61972	0.444847	3.85303	0.835867	0.141713	0.15512	0.0982567	0.15512
MZT2B	ENST00000651060.1	0.000272709	0.00809441	3.76378	1.03402	2.97386	4.5518	1.03651	0.567298	0.288215	0.567298
CRYBG2	ENST00000475866.3	0.000276695	0.008198	0.718029	0.197467	5.23297	0.150956	0.0320754	0.00169406	0.0264145	0.0264145
OCIAD1	ENST00000511102.5	0.000279307	0.00825886	5.09197	1.40129	2.27014	7.46242	0.86271	2.08272	0.579405	2.08272
PTPRU	ENST00000428026.6	0.000279073	0.00825886	0.684998	0.188498	6.73164	0.111091	0.0406609	-0.0222213	0.0126361	0.0126361
NA	ENST00000302102.9	0.000279488	0.00825886	6.1083	1.68106	2.6926	10.4225	1.34797	2.89096	0.387591	2.89096
ABCD1	ENST00000218104.6	0.00028142	0.00831195	0.665293	0.183184	4.72541	0.168272	0.0115608	0.0387738	0.0374733	0.0387738
SIPA1L1	ENST00000537413.5	0.000281613	0.00831394	0.587886	0.161878	6.04783	0.176596	0.0228404	0.0111975	0.0164665	0.0164665
RAB2A	ENST00000531289.5	0.000282455	0.00833508	0.672345	0.185174	5.46544	0.114648	0.0284129	-0.0181156	0.0230213	0.0230213
RNF215	ENST00000382363.7	0.000291526	0.00855315	0.74749	0.206334	4.82969	0.141307	0.0293767	0.0192267	0.034484	0.034484
DDX5	ENST00000580026.5	0.000294018	0.00860718	0.841787	0.232505	4.65804	0.166946	0.0413771	-0.0126321	0.0397106	0.0397106
B3GAT1	ENST00000312527.9	0.000300807	0.00876713	0.807999	0.223537	5.41053	0.146274	0.051165	-0.0414599	0.0237884	0.0237884
PAQR4	ENST00000318782.8	0.000302948	0.00881788	0.628025	0.173835	5.57926	0.11801	0.0238707	0.00156127	0.0214571	0.0214571
LARGE2	ENST00000401752.6	0.000303531	0.00883097	1.3058	0.361491	6.85099	0.549416	0.183873	-0.00196352	0.0121407	0.0121407
GSE1	ENST00000405402.6	0.000306331	0.00888119	1.33932	0.371016	6.40356	0.515534	0.0872169	0.119262	0.0142063	0.119262
JARID2	ENST00000397311.4	0.00030678	0.00888641	2.06718	0.572703	6.3763	1.18898	0.477631	-0.0698065	0.0143526	0.0143526
ETS1	ENST00000319397.6	0.000311069	0.00897118	4.21135	1.16791	2.00099	4.46297	1.31473	-0.836841	0.731272	0.731272
PDXP	ENST00000215904.7	0.000311198	0.00897118	0.585083	0.162262	5.85593	0.122021	0.0138642	0.0256291	0.0181411	0.0256291
HCFC1R1	ENST00000574151.5	0.000311643	0.00897838	0.637273	0.176754	5.44759	0.097452	0.0235937	0.00405688	0.0232692	0.0232692
AP2A1	ENST00000359032.9	0.000311719	0.00897838	5.21471	1.44638	2.20066	7.63686	1.19858	1.93943	0.616153	1.93943
MYCL	ENST00000372816.3	0.000313118	0.00900828	0.826374	0.229281	5.40256	0.191416	0.047484	0.0313706	0.0239009	0.0313706
AC098484.3	ENST00000603943.6	0.000314649	0.00904309	2.89195	0.802666	2.7358	2.45172	0.595167	0.13005	0.371243	0.371243
STUM	ENST00000366789.5	0.000315953	0.00907662	1.49629	0.415422	5.16141	0.628662	0.011377	0.247486	0.0275757	0.247486
ETV4	ENST00000319349.10	0.0003161	0.0090769	1.28322	0.356279	6.83511	0.460467	0.0335813	0.156821	0.0122033	0.156821
ANKHD1-EIF4EBP3	ENST00000437495.1	0.00031843	0.00913192	3.72499	1.03477	3.43527	3.77229	1.44346	-0.591617	0.162659	0.162659
CARM1	ENST00000586298.1	0.000323874	0.00925994	0.58817	0.163589	5.65993	0.0894407	0.0197769	0.00636194	0.0203651	0.0203651
GSTP1	ENST00000398606.8	0.000324786	0.00928199	0.602841	0.167703	5.5407	0.214071	0.0202016	0.00676484	0.021985	0.021985
SOX15	ENST00000250055.2	0.000325178	0.0092892	0.683862	0.190259	5.8219	0.128418	0.00397888	0.050319	0.018485	0.050319
CDCA7	ENST00000410101.7	0.000325611	0.00929754	5.30269	1.47542	2.2748	7.94671	1.2979	1.9674	0.576991	1.9674
GPT2	ENST00000340124.9	0.000327821	0.0093349	0.59035	0.164339	8.45549	0.0957921	0.000361887	0.0401493	0.00996804	0.0401493
XPO7	ENST00000433566.8	0.000336865	0.0095325	4.02601	1.12296	5.08594	5.38044	1.86267	-0.180651	0.0288958	0.0288958
TNFAIP2	ENST00000560869.5	0.000339051	0.00957297	1.26066	0.351799	4.95521	0.484902	0.154152	-0.0274575	0.0314913	0.0314913
SPPL2B	ENST00000589515.2	0.000339697	0.00958098	0.763199	0.213007	4.62264	0.170835	0.0270589	0.0193439	0.040999	0.040999
IPO11	ENST00000512177.1	0.000339737	0.00958098	4.11883	1.14956	1.5922	4.78238	0.905085	1.07716	1.01315	1.07716
GMPPB	ENST00000308388.6	0.00034106	0.0096101	0.607941	0.169724	5.46859	0.104094	0.00756454	0.035645	0.0229775	0.035645
COX19	ENST00000344111.4	0.000341845	0.00962812	0.830836	0.231991	6.50143	0.202934	0.00172954	0.079	0.0137058	0.079
FLYWCH2	ENST00000396958.8	0.00034409	0.00967899	0.587053	0.163999	5.43355	0.0846637	0.0168782	0.00679426	0.0234651	0.0234651
GSTO2	ENST00000369707.2	0.000351939	0.00981218	0.605723	0.169493	6.10917	0.155471	0.0270808	0.00249136	0.0160113	0.0160113
GALNT7	ENST00000506317.1	0.000354572	0.00984823	3.11289	0.871525	2.45458	3.49658	0.650661	0.469183	0.488673	0.488673
NQO2	ENST00000397717.6	0.000355503	0.0098658	0.607448	0.170102	5.46958	0.209776	0.0118356	0.0315663	0.0229638	0.0315663
NAA10	ENST00000370009.5	0.000360854	0.00997711	0.631358	0.176991	5.58458	0.104881	0.0256044	0.0124227	0.0213843	0.0213843
LFNG	ENST00000614382.1	0.00036532	0.010079	1.34563	0.377569	4.6822	0.501147	0.0846145	0.129223	0.0388773	0.129223
POM121C	ENST00000607367.5	0.000366553	0.0101047	0.59637	0.167376	5.66009	0.111451	0.019486	0.0225359	0.020363	0.0225359
CFAP92	ENST00000515659.1	0.000374421	0.0102787	1.09003	0.306404	4.6026	0.575125	0.0131816	0.127644	0.0417662	0.127644
INAFM1	ENST00000552360.3	0.000380036	0.0104069	0.785128	0.22094	4.27481	0.128873	0.0141576	0.00329385	0.0590644	0.0590644
GGCT	ENST00000447901.1	0.000385602	0.0105451	3.47292	0.978357	2.53257	2.9321	0.982264	-0.313479	0.453509	0.453509
PPP2R2C	ENST00000506140.5	0.00039051	0.0106479	3.96325	1.11754	2.08517	4.76978	1.19246	-0.663773	0.680871	0.680871
GADD45A	ENST00000370986.9	0.000390605	0.0106479	0.635575	0.179219	5.27922	0.181849	0.0157633	0.032416	0.0257011	0.032416
GRIN2D	ENST00000263269.3	0.000397671	0.0108049	0.865861	0.244481	7.22701	0.24023	0.000879967	0.0887767	0.0109326	0.0887767
AC010507.1	ENST00000633895.1	0.000398784	0.0108262	3.40525	0.961693	2.22022	3.24666	0.781604	0.337238	0.605675	0.605675
METTL7A	ENST00000550502.1	0.000401152	0.0108727	3.77209	1.06576	1.75005	3.47615	0.806507	-0.660072	0.897276	0.897276
MYO6	ENST00000627432.2	0.000402156	0.0108865	4.72829	1.33618	2.89523	7.8688	2.36318	-1.95644	0.314885	0.314885
HLA-C	ENST00000479595.5	0.000402532	0.0108922	3.94485	1.11486	3.77925	4.89571	1.75683	-0.967047	0.107542	0.107542
FOXH1	ENST00000525197.1	0.00040519	0.0109418	0.773778	0.218787	5.44845	0.216594	0.0106597	0.0611417	0.0232572	0.0611417
OBSL1	ENST00000462534.5	0.000405509	0.0109459	0.59544	0.168371	4.91865	0.141205	0.0102183	0.0259027	0.032305	0.032305
RPL29	ENST00000480306.5	0.000408584	0.0110155	3.49987	0.99021	2.71324	3.89662	0.174581	1.29619	0.379702	1.29619
CDC42EP2	ENST00000279249.3	0.000410263	0.0110517	0.787344	0.222829	5.5143	0.180737	0.0222263	0.052253	0.0223473	0.052253
PPP4R3A	ENST00000555462.5	0.000411749	0.0110782	0.834552	0.236254	6.08529	0.250227	0.0675394	-0.00412354	0.0161845	0.0161845
TMOD1	ENST00000259365.9	0.000417601	0.0112129	4.58903	1.30049	2.38468	5.42911	2.01506	-1.88179	0.521838	0.521838
FAM207A	ENST00000291634.11	0.000421049	0.011278	0.60607	0.17186	5.7445	0.106685	0.00919391	0.0351101	0.0193301	0.0351101
DNMBP	ENST00000543621.6	0.000422093	0.0113014	0.984369	0.279185	7.49126	0.276769	0.00122411	0.115692	0.010366	0.115692
UNC5B	ENST00000335350.10	0.00042422	0.0113537	0.898132	0.254823	6.63279	0.248398	0.0298908	0.067511	0.0130818	0.067511
POFUT2	ENST00000471540.5	0.000428433	0.0114295	1.03627	0.294233	4.70367	0.339284	0.0850959	0.0447639	0.0381664	0.0447639
COQ4	ENST00000608951.5	0.000429111	0.011443	3.39769	0.964842	2.36729	3.22254	0.866054	0.0658689	0.530327	0.530327
TINAGL1	ENST00000271064.12	0.000434311	0.0115398	0.637478	0.181189	5.40898	0.106729	0.0254338	0.012295	0.0238103	0.0238103
RCCD1	ENST00000555155.5	0.000435129	0.0115569	4.24509	1.20674	2.05223	4.92453	1.48407	-0.585824	0.700272	0.700272
CRISPLD1	ENST00000519798.1	0.000436333	0.0115749	2.98438	0.848542	2.78842	2.56486	0.727871	0.132815	0.352163	0.352163
ZNF687	ENST00000426871.1	0.000441485	0.0116695	5.30519	1.50975	2.2433	8.02213	2.4858	0.933208	0.593443	0.933208
NUDT18	ENST00000613958.1	0.000444442	0.0117211	3.39941	0.967891	1.56157	2.98534	0.368579	-0.201239	1.03664	1.03664
SLC17A9	ENST00000370349.7	0.000445682	0.0117429	0.775559	0.220866	5.2955	0.168148	0.0287584	0.0444145	0.0254557	0.0444145
XPO6	ENST00000566073.1	0.000448497	0.0118076	1.05803	0.301454	3.84074	0.328826	0.0365624	-0.0237286	0.099749	0.099749
YIF1B	ENST00000589247.1	0.000450765	0.0118438	0.751833	0.214294	5.08069	0.171737	0.0398908	0.0226261	0.0289918	0.0289918
HPS1	ENST00000338546.9	0.000457094	0.0119862	0.871911	0.248782	4.68332	0.180023	0.0539994	-0.0274888	0.0388395	0.0388395
DNMT1	ENST00000586588.5	0.000459532	0.0120332	0.656066	0.187271	5.01068	0.194958	0.0222706	0.00711193	0.030335	0.030335
ACTB	ENST00000493945.6	0.000463154	0.012102	3.89149	1.11147	4.84075	5.02755	1.15235	0.700698	0.0341962	0.700698
CLCNKB	ENST00000375667.7	0.000463974	0.0121186	0.917994	0.262229	4.15002	0.200621	0.0347378	-0.00329553	0.0684082	0.0684082
YY1	ENST00000553625.5	0.000465572	0.012146	3.50782	1.00228	2.15386	3.11594	0.8651	0.0137347	0.641762	0.641762
CAAP1	ENST00000520187.1	0.000465408	0.012146	3.27083	0.934546	2.66232	3.81947	0.91065	0.300714	0.399415	0.399415
ANO9	ENST00000534161.5	0.000467147	0.0121823	3.45697	0.98801	1.83747	3.83383	0.627418	-0.433579	0.836828	0.836828
ZNF414	ENST00000255616.8	0.00046772	0.0121924	0.607785	0.173723	5.15806	0.101025	0.0176374	-0.00815835	0.027632	0.027632
LIPE	ENST00000244289.9	0.000470056	0.0122437	0.846367	0.242008	4.66236	0.200291	0.0198525	0.0679996	0.0395591	0.0679996
FAM120A	ENST00000652239.1	0.000473287	0.0123181	4.43816	1.2697	1.80992	5.68835	0.308271	2.10994	0.855587	2.10994
MED15P9	ENST00000427638.1	0.000475808	0.012374	0.809282	0.231619	4.24664	0.230879	0.0194457	0.0511998	0.0610256	0.0610256
CSNK1G3	ENST00000511130.6	0.000477323	0.0123937	3.99771	1.14444	2.05169	4.41228	1.264	-1.04583	0.700596	0.700596
CA10	ENST00000451037.7	0.000481271	0.0124768	4.18177	1.19788	1.65133	5.03782	0.553219	1.59916	0.968735	1.59916
NA	ENST00000217964.11	0.000483287	0.0125144	5.25744	1.50649	3.08811	8.24589	3.15271	-3.05325	0.251572	0.251572
VPS4B	ENST00000591519.1	0.000489196	0.0126427	3.92944	1.12701	1.47472	4.30129	0.800144	0.95098	1.10509	1.10509
RUSF1	ENST00000327237.7	0.000490578	0.0126537	0.692861	0.198764	6.70015	0.155684	0.00349376	0.0557669	0.0127763	0.0557669
KCTD7	ENST00000443322.1	0.000490373	0.0126537	4.05244	1.1625	1.79773	3.88981	1.16314	-0.730017	0.863973	0.863973
MUS81	ENST00000308110.9	0.000494111	0.012715	0.585164	0.167961	5.93101	0.100556	0.00513101	0.0371853	0.0174357	0.0371853
MAN2A2	ENST00000559717.6	0.000494013	0.012715	4.44376	1.27548	3.4686	5.79642	2.28416	-0.448669	0.156126	0.156126
DLL3	ENST00000600437.1	0.000496667	0.012756	0.85539	0.245622	5.52963	0.279483	0.0056891	0.0848061	0.0221369	0.0848061
QSOX1	ENST00000443059.1	0.000501899	0.0128566	3.36097	0.965867	2.76981	4.01461	0.646633	0.752715	0.358808	0.752715
YEATS4	ENST00000552949.1	0.000504251	0.0129084	3.69786	1.06306	3.64803	4.34522	0.505157	1.19	0.126066	1.19
PDCD6IP	ENST00000477798.5	0.000504414	0.0129084	3.49789	1.0056	2.67408	3.99414	1.12207	0.260664	0.394787	0.394787
SRRT	ENST00000423692.5	0.000505313	0.0129229	2.97622	0.855748	2.04383	2.75493	0.393168	0.377779	0.705288	0.705288
CCAR1	ENST00000543225.5	0.000513491	0.0130865	4.49179	1.29312	3.7537	6.77735	1.19585	1.31237	0.110943	1.31237
AFDN	ENST00000507704.5	0.000516787	0.013143	0.594455	0.171219	5.49543	0.130844	0.0213671	0.014827	0.0226068	0.0226068
MBD3	ENST00000590550.6	0.000518564	0.0131752	0.876428	0.252502	5.09324	0.345134	0.0527978	0.0428378	0.028763	0.0428378
LTO1	ENST00000279147.8	0.000528607	0.0133824	1.02267	0.295071	5.73005	0.298365	0.00764007	0.122961	0.0194983	0.122961
MEF2B	ENST00000410050.5	0.000530385	0.0134086	3.7201	1.07365	2.72844	4.20364	1.11784	0.611229	0.373987	0.611229
AK4	ENST00000470888.6	0.000530351	0.0134086	2.37606	0.685743	3.27379	1.41774	0.505993	-0.274296	0.199372	0.199372
ERCC1	ENST00000589165.5	0.000531378	0.0134183	3.40098	0.981688	2.74813	4.07015	0.605046	0.840522	0.366693	0.840522
MPG	ENST00000356432.7	0.00053599	0.0135141	0.928033	0.268055	5.97784	0.242343	0.0257743	0.0820062	0.0170297	0.0820062
RAB12	ENST00000649141.1	0.000542574	0.0136334	3.72122	1.07587	4.36864	4.38553	1.0829	0.653345	0.0531141	0.653345
NT5C3B	ENST00000475053.5	0.000552179	0.0138222	3.46275	1.00251	2.62337	3.76491	1.09247	-0.074812	0.415071	0.415071
WFDC2	ENST00000447118.5	0.000554842	0.0138836	1.02165	0.295892	4.0135	0.215665	0.0506209	-0.02401	0.0807072	0.0807072
PRKAB1	ENST00000229328.10	0.000555323	0.0138904	0.599559	0.173657	6.11421	0.113319	0.0248923	0.0203428	0.0159753	0.0203428
DOCK6	ENST00000587656.5	0.000557545	0.0139315	0.734213	0.212725	5.70677	0.166058	0.0478592	0.0200185	0.0197765	0.0200185
MARCHF8	ENST00000453424.7	0.00056873	0.0141562	3.78689	1.09889	1.95988	4.14801	1.05447	-0.839819	0.756869	0.756869
TRRAP	ENST00000628380.2	0.000570146	0.0141861	4.73545	1.37441	2.21492	6.24994	2.22501	0.492933	0.608504	0.608504
SYNGR1	ENST00000318801.8	0.000571336	0.0141959	0.615637	0.178711	5.1138	0.117594	0.0195111	0.0197893	0.0283955	0.0283955
JPT2	ENST00000382711.9	0.000577543	0.0143091	4.5838	1.33175	2.43554	5.94925	2.16276	-1.58389	0.497554	0.497554
THRA	ENST00000584985.5	0.000577651	0.0143091	4.05001	1.17668	1.59072	4.71337	1.06258	0.920238	1.01427	1.01427
DNMT3A	ENST00000496570.1	0.000581385	0.0143792	2.32876	0.676935	2.43875	1.81709	0.191312	0.47486	0.49605	0.49605
RPRM	ENST00000325926.4	0.000584784	0.0144391	0.611414	0.17781	4.71441	0.0857429	0.00960401	0.00974571	0.0378207	0.0378207
ATXN2L	ENST00000566007.5	0.000589637	0.014529	1.1454	0.333319	3.75642	0.362886	0.0560746	0.0666491	0.110577	0.110577
GNAI1	ENST00000649214.1	0.000591162	0.0145612	0.827581	0.240881	5.50647	0.165631	0.064581	-0.018395	0.0224548	0.0224548
GPS2	ENST00000389167.9	0.000595978	0.014658	0.692086	0.201572	5.33871	0.138176	0.0361299	0.0218338	0.0248172	0.0248172
VARS2	ENST00000482947.5	0.000601959	0.0147538	3.66544	1.06841	3.51549	3.7744	1.56473	-0.41796	0.147533	0.147533
AL845454.2	ENST00000453518.1	0.000603573	0.0147843	3.5823	1.0444	2.85754	4.2311	0.291559	1.3446	0.327952	1.3446
AKAP1	ENST00000314126.4	0.000605004	0.0148139	4.2468	1.23837	2.10824	4.7486	1.63279	-1.18916	0.667534	0.667534
HDGF	ENST00000469145.5	0.000618707	0.0150713	3.69751	1.08011	3.09884	4.75992	1.17541	0.574537	0.248288	0.574537
JDP2	ENST00000267569.5	0.000618557	0.0150713	0.806584	0.235613	6.64687	0.201809	0.00202978	0.0812404	0.0130173	0.0812404
AZIN1	ENST00000518940.5	0.000619182	0.0150773	1.24359	0.363295	3.79763	0.51155	0.0928216	0.0926123	0.105154	0.105154
FMC1	ENST00000297534.7	0.000620874	0.0150944	0.745598	0.217863	4.40656	0.147537	0.0202452	0.0216817	0.0509512	0.0509512
PRDX1P1	ENST00000449329.2	0.000621022	0.0150944	1.1714	0.342288	4.25305	0.81026	0.0206424	0.1551	0.060572	0.1551
C2CD4C	ENST00000332235.8	0.000624358	0.0151493	0.83071	0.24284	5.43042	0.246612	0.00574829	0.082709	0.0235089	0.082709
CSNK1E	ENST00000431611.5	0.000625153	0.0151613	0.687166	0.200899	4.80123	0.128671	0.0252916	0.00820777	0.0352488	0.0352488
B3GALT5	ENST00000615480.4	0.000626467	0.0151816	0.910445	0.266221	4.59802	0.286566	0.0643646	0.0168974	0.0419456	0.0419456
SMIM11A	ENST00000399292.7	0.000628062	0.0152096	5.51826	1.6139	2.31054	8.17067	3.34837	-0.246269	0.558661	0.558661
TMEM268	ENST00000288502.9	0.000629101	0.0152292	0.745723	0.218128	6.39608	0.157799	0.0038253	0.0675442	0.0142461	0.0675442
OVOL2	ENST00000278780.7	0.000630704	0.0152568	0.919056	0.268883	4.31612	0.305542	0.0521099	0.0107261	0.0563371	0.0563371
SNRNP70	ENST00000544278.2	0.000632775	0.0152846	0.789018	0.230899	5.31141	0.31044	0.00967106	0.0703003	0.0252185	0.0703003
PSMG4	ENST00000419065.6	0.000634392	0.0153124	0.627185	0.183577	4.83319	0.0948609	0.0161585	0.00986381	0.0343923	0.0343923
ARSD	ENST00000381154.6	0.000634771	0.015316	0.628391	0.183939	5.11999	0.143702	0.00774021	0.04301	0.0282864	0.04301
ARHGEF5	ENST00000498580.5	0.000636783	0.0153366	0.89482	0.261992	5.43357	0.243585	0.00686526	0.0960947	0.0234649	0.0960947
CLEC11A	ENST00000250340.9	0.000643615	0.0154592	0.737333	0.216066	4.36733	0.178584	0.0168353	0.0480177	0.0531916	0.0531916
SMARCA2	ENST00000450198.6	0.000643978	0.0154592	4.01647	1.17703	3.05727	5.01444	1.81692	0.239521	0.261167	0.261167
SLC25A39	ENST00000225308.12	0.000644537	0.015467	0.70612	0.206943	7.00455	0.122356	0.0526524	-0.0205809	0.0115858	0.0115858
KIFC2	ENST00000531425.5	0.000646663	0.0155068	3.25878	0.955303	1.7082	3.57827	0.441746	-0.113399	0.927161	0.927161
SLC29A3	ENST00000479577.2	0.000658928	0.0157438	3.02125	0.887005	2.26468	3.07928	0.597924	0.438155	0.582244	0.582244
TRIM8	ENST00000302424.12	0.000661487	0.0157879	0.682897	0.200554	5.24326	0.194929	0.0340791	0.0113204	0.0262535	0.0262535
SULT4A1	ENST00000422525.1	0.000663669	0.0158285	1.04027	0.305587	5.20072	0.320596	0.113147	-0.0321369	0.0269283	0.0269283
CHST1	ENST00000308064.7	0.000665677	0.0158478	0.677734	0.199138	4.53651	0.149876	0.0117604	0.0477234	0.0445087	0.0477234
SPATA6L	ENST00000406861.6	0.000669682	0.0159167	3.16166	0.929435	2.33634	2.80252	0.750114	-0.0227281	0.545661	0.545661
AC073111.4	ENST00000641234.1	0.000670052	0.0159176	1.37274	0.403565	3.31005	0.463985	0.0538952	0.0659374	0.190401	0.190401
PLAT	ENST00000429089.6	0.000671115	0.0159372	4.81255	1.41499	1.72375	5.50611	2.08731	-0.536317	0.915991	0.915991
ATF5	ENST00000600336.1	0.000671843	0.015943	2.18693	0.643059	3.22499	1.36197	0.221063	0.399224	0.212099	0.399224
METRN	ENST00000219542.3	0.000678236	0.0160602	0.91051	0.267937	4.15355	0.189255	0.0395647	-0.00975467	0.0681202	0.0681202
ZMYND8	ENST00000467200.6	0.000679702	0.0160834	0.678319	0.199644	6.65243	0.155547	0.0450267	0.01476	0.0129919	0.01476
FOXL2NB	ENST00000383165.4	0.0006806	0.0160989	0.844406	0.248554	5.84309	0.323917	0.00322603	0.0894425	0.018269	0.0894425
CCDC157	ENST00000338306.7	0.000683407	0.0161534	3.24803	0.956384	2.44718	3.31559	0.492654	0.879353	0.492115	0.879353
VPS37A	ENST00000519381.1	0.000683637	0.0161534	3.70922	1.09221	1.62341	3.30594	0.799839	-0.471677	0.989555	0.989555
ID1	ENST00000376112.4	0.000684872	0.0161768	0.634327	0.186811	7.29453	0.122489	0.000982148	0.0513651	0.0107671	0.0513651
CLDN12	ENST00000394604.5	0.00068687	0.0162182	3.43398	1.01155	2.49184	3.58638	1.06322	0.243748	0.471631	0.471631
RNF6	ENST00000381588.9	0.000687726	0.0162326	0.943511	0.277959	5.59985	0.262413	0.0947164	-0.00644233	0.0211753	0.0211753
TMEM241	ENST00000477053.5	0.000692452	0.0163209	3.58935	1.05801	2.44676	3.53015	1.18677	-0.11192	0.49231	0.49231
MYBL2	ENST00000396863.8	0.000692433	0.0163209	0.807693	0.238078	5.96077	0.188787	0.0276638	0.0573577	0.0171749	0.0573577
PGGHG	ENST00000409479.5	0.000692714	0.0163212	0.732066	0.215793	6.14793	0.207392	0.00643782	0.0634121	0.0157401	0.0634121
OTX2	ENST00000554845.1	0.00071583	0.0167288	3.52069	1.04056	1.60926	3.24763	0.623949	-0.274066	1.00021	1.00021
YIPF3	ENST00000460903.2	0.000715649	0.0167288	3.58233	1.05876	3.17804	5.10323	0.839139	0.842321	0.225031	0.842321
RBP1	ENST00000232219.6	0.000721301	0.016827	0.680926	0.201377	5.22767	0.153949	0.0209537	0.0398752	0.0264979	0.0398752
ACCS	ENST00000263776.8	0.000722685	0.0168504	0.895622	0.264912	4.15816	0.255775	0.0375219	0.06052	0.0677458	0.0677458
PFKM	ENST00000551339.6	0.000735442	0.0170906	5.34728	1.5839	4.65502	8.95367	1.99852	1.76461	0.0398173	1.76461
ZNF414	ENST00000393927.9	0.000737713	0.0171201	0.656951	0.194643	4.81071	0.127522	0.0218385	0.00823878	0.0349901	0.0349901
ZNF415	ENST00000597503.5	0.000737749	0.0171201	4.71748	1.39771	1.99603	5.82055	2.19606	-0.32312	0.734329	0.734329
RNASET2	ENST00000508775.5	0.000771105	0.0177145	1.49209	0.443683	5.3212	0.548036	0.270208	-0.238609	0.0250739	0.0250739
FAM122B	ENST00000493333.5	0.000771466	0.0177161	4.28654	1.27468	2.06503	5.27416	1.27049	1.16673	0.692684	1.16673
FGFR1	ENST00000335922.9	0.000793119	0.01812	0.775733	0.231204	6.50596	0.162519	0.0664996	-0.00811096	0.0136835	0.0136835
AGFG2	ENST00000429987.1	0.000793453	0.0181204	1.80111	0.536833	3.29307	1.12368	0.237735	0.0690776	0.194548	0.194548
CDK6	ENST00000424848.2	0.000795671	0.0181585	1.28864	0.384175	4.79861	0.606224	0.0699019	0.151484	0.035321	0.151484
DNMT3A	ENST00000406659.3	0.000804496	0.018322	1.01851	0.303921	3.99148	0.298457	0.0261789	0.112373	0.0829103	0.112373
LY6G5C	ENST00000474395.5	0.000826811	0.0187785	3.69498	1.10507	1.5502	3.02715	0.786325	-0.63345	1.04544	1.04544
MEIS3	ENST00000331559.9	0.000837132	0.0189673	0.857867	0.25683	5.762	0.263085	0.0107933	0.0881489	0.0191311	0.0881489
RNASEH2B	ENST00000646731.1	0.000839633	0.0190045	4.1865	1.25367	1.42283	4.17203	1.21023	-0.0307746	1.14731	1.14731
ATG4D	ENST00000586417.5	0.000843477	0.0190784	0.73437	0.219995	5.1294	0.20006	0.0423728	0.030224	0.0281222	0.030224
BCL11A	ENST00000358510.6	0.000856323	0.0192899	3.75876	1.12743	3.13252	4.86123	0.620841	1.2858	0.238183	1.2858
LRRTM1	ENST00000409148.1	0.000862603	0.0193917	3.55841	1.06799	1.83811	2.82148	0.874495	-0.438726	0.836399	0.836399
OXER1	ENST00000378661.3	0.000863851	0.0193959	1.15239	0.34591	3.54792	0.294944	0.0374908	0.0110986	0.14199	0.14199
DRAM2	ENST00000286692.8	0.000863678	0.0193959	0.878137	0.263583	5.39984	0.178677	0.0802747	-0.0526148	0.0239394	0.0239394
PPP2R3B	ENST00000629050.2	0.000865921	0.0194267	2.72669	0.818626	2.82111	2.48761	0.444084	0.561138	0.340683	0.561138
SMARCE1	ENST00000478349.7	0.000874066	0.0195696	3.95963	1.18972	3.48946	5.81281	0.82086	1.30229	0.152217	1.30229
JADE1	ENST00000511647.5	0.00087765	0.0196272	0.650043	0.19538	7.76986	0.156161	0.0015714	0.0556887	0.00999163	0.0556887
SCRIB	ENST00000356994.7	0.000877824	0.0196272	0.608012	0.18275	6.19132	0.136419	0.031468	0.0186283	0.0154505	0.0186283
EVC2	ENST00000344408.10	0.000878274	0.0196306	0.74525	0.224009	5.12199	0.150112	0.0470188	0.0141215	0.0282515	0.0282515
RHBDD3	ENST00000496342.1	0.000881674	0.0196999	0.673845	0.202612	4.52447	0.17081	0.0165319	0.0215432	0.0450455	0.0450455
H2AW	ENST00000366695.3	0.000892936	0.0198844	0.825245	0.248399	5.10335	0.20659	0.00362883	0.0889245	0.0285813	0.0889245
VAPB	ENST00000265619.6	0.000892633	0.0198844	3.28131	0.987649	2.47196	3.62902	0.811228	0.651948	0.480668	0.651948
H2AW	ENST00000645741.1	0.000892936	0.0198844	0.825245	0.248399	5.10335	0.20659	0.00362883	0.0889245	0.0285813	0.0889245
ADGRA1	ENST00000392607.7	0.000893292	0.0198857	2.70876	0.815366	2.12361	2.72927	0.31821	0.679023	0.658762	0.679023
COL17A1	ENST00000648076.2	0.000894449	0.0198913	4.38464	1.31997	1.68281	5.16692	1.66788	0.313907	0.945585	0.945585
HNRNPM	ENST00000348943.7	0.00089424	0.0198913	0.781723	0.235328	5.90001	0.208195	0.0653503	-0.0152052	0.0177184	0.0177184
APC2	ENST00000593146.1	0.000908383	0.0201606	0.805597	0.242835	4.38586	0.188049	0.0169231	0.0715303	0.0521155	0.0715303
SRRM1	ENST00000374389.8	0.000909874	0.0201801	5.0423	1.52013	4.42559	8.61455	0.686801	2.77941	0.0499158	2.77941
SLC16A1	ENST00000629508.2	0.000911563	0.020204	4.34413	1.30986	4.01298	7.46919	0.897822	1.67577	0.0807585	1.67577
SLC16A1	ENST00000443580.5	0.000911563	0.020204	4.34413	1.30986	4.01298	7.46919	0.897822	1.67577	0.0807585	1.67577
ARMC10	ENST00000323735.10	0.000917494	0.0202947	3.39453	1.02409	1.76887	3.59627	0.689106	-0.529324	0.884037	0.884037
PHYKPL	ENST00000308158.10	0.000918911	0.0203192	0.770463	0.23247	4.62412	0.294132	0.0401204	0.0205372	0.0409433	0.0409433
SPARC	ENST00000538026.5	0.000925549	0.0204387	3.11919	0.941718	4.54231	2.60229	1.286	-0.712146	0.044254	0.044254
OGFOD2	ENST00000545612.5	0.000926929	0.0204487	3.45068	1.04193	2.34366	3.43911	1.08642	0.293165	0.542008	0.542008
GUCA1A	ENST00000372958.1	0.000926876	0.0204487	0.620262	0.187287	5.32343	0.176052	0.00673806	0.0458764	0.0250411	0.0458764
DCAF13	ENST00000616836.4	0.000931037	0.0205051	0.764668	0.230977	4.8763	0.130133	0.0467212	-0.0314109	0.0333045	0.0333045
AKAP8L	ENST00000609519.5	0.000941272	0.0206824	0.761445	0.230217	5.75866	0.187739	0.0603309	-0.0110306	0.0191686	0.0191686
FTO	ENST00000431610.6	0.00094588	0.0207698	3.74269	1.13204	2.20966	3.91864	1.31095	-0.035772	0.61132	0.61132
RRP8	ENST00000533907.1	0.000949258	0.0208371	0.731135	0.221211	4.67795	0.118345	0.0343801	-0.018336	0.0390214	0.0390214
HIPK1	ENST00000369553.5	0.000954135	0.0209233	4.60577	1.39412	1.79162	5.67071	2.04715	0.111281	0.868197	0.868197
CHST8	ENST00000438847.7	0.000954649	0.0209269	0.674492	0.204171	5.8805	0.156329	0.0212041	0.0413246	0.0179024	0.0413246
BCAR1	ENST00000538440.6	0.0009569	0.0209492	0.737159	0.223185	7.27637	0.161944	0.00860162	0.066116	0.0108102	0.066116
ST3GAL4	ENST00000227495.10	0.00095792	0.020964	4.44012	1.34443	1.64773	4.9876	1.73984	-0.0621724	0.971402	0.971402
P2RY11	ENST00000321826.5	0.000958209	0.020964	0.668662	0.20247	4.56072	0.222098	0.0180271	0.0375868	0.0434644	0.0434644
CARMIL2	ENST00000334583.11	0.00095943	0.0209768	0.738332	0.22359	5.69131	0.169648	0.0299093	0.0450797	0.0199664	0.0450797
TMEM121B	ENST00000331437.3	0.000964316	0.0210204	1.30022	0.393918	4.44479	0.581522	0.12878	0.103977	0.048904	0.103977
KLHL34	ENST00000379499.3	0.000965662	0.0210228	0.840736	0.254742	4.05623	0.175929	0.0207303	0.0371316	0.0766099	0.0766099
DNMT3A	ENST00000402667.1	0.000969596	0.0210599	1.10643	0.335364	5.51756	0.398949	0.0301234	0.13858	0.0223025	0.13858
ENGASE	ENST00000300682.14	0.000970866	0.0210781	0.609015	0.184615	5.86221	0.135785	0.00367771	0.0474463	0.0180793	0.0474463
CMTM7	ENST00000349718.8	0.000971392	0.0210781	0.729767	0.22123	4.9667	0.138992	0.0421694	0.00366707	0.0312444	0.0312444
AC079880.1	ENST00000603040.1	0.000974717	0.0211364	0.640511	0.194228	5.04073	0.126107	0.00706783	0.0495191	0.0297438	0.0495191
MYADM	ENST00000448420.5	0.000983165	0.0212987	3.99775	1.21317	2.14365	4.85349	1.56021	-1.19072	0.647461	0.647461
CRTC1	ENST00000338797.10	0.000983855	0.0213005	3.93185	1.19324	2.19695	4.87132	1.51758	-1.4496	0.618156	0.618156
TGIF1	ENST00000330513.9	0.000985943	0.0213309	0.794815	0.241255	4.80609	0.194007	0.03018	0.0571256	0.0351157	0.0571256
TMEM200C	ENST00000383490.2	0.000987253	0.0213523	1.02085	0.309898	3.8995	0.611407	0.051244	0.0249975	0.0928114	0.0928114
RASSF4	ENST00000340258.10	0.000988692	0.0213555	0.620083	0.188262	5.79876	0.151601	0.00832434	0.0448395	0.0187282	0.0448395
PNPLA6	ENST00000600737.5	0.000988356	0.0213555	0.960793	0.291695	6.72106	0.300587	0.0939487	0.0336806	0.0126829	0.0336806
PSRC1	ENST00000409138.6	0.000989904	0.0213608	0.819423	0.248809	4.93652	0.222365	0.0597384	0.0331204	0.0319018	0.0331204
CCDC114	ENST00000474199.5	0.0010064	0.0216391	3.28537	0.998977	2.50667	3.41835	0.628703	0.86823	0.46497	0.86823
HMBS	ENST00000537841.5	0.00102753	0.0220086	3.56235	1.08513	1.88005	2.9824	0.957879	-0.446863	0.808385	0.808385
NA	ENST00000628117.2	0.00102753	0.0220086	3.56235	1.08513	1.88005	2.9824	0.957879	-0.446863	0.808385	0.808385
SMARCA4	ENST00000344626.9	0.00103095	0.0220508	4.58857	1.39813	1.75571	5.60313	2.03885	0.0965597	0.893285	0.893285
WASF1	ENST00000359451.6	0.00103878	0.0221269	4.29313	1.30896	2.42379	5.77768	2.06697	-1.79602	0.503093	0.503093
NFE2L1	ENST00000577431.1	0.00104118	0.0221494	2.89753	0.88362	1.89368	2.43679	0.371755	0.189105	0.799422	0.799422
RTCA	ENST00000498617.5	0.00104112	0.0221494	1.63862	0.499706	3.91668	0.787902	0.189465	0.185095	0.0908737	0.185095
CDK17	ENST00000543119.6	0.00104382	0.0221913	0.821705	0.250639	5.76369	0.200478	0.0167339	0.077496	0.0191121	0.077496
TMEM62	ENST00000260403.7	0.00105106	0.0223307	0.779813	0.238002	4.60053	0.175156	0.0431206	0.0127898	0.0418471	0.0418471
CDYL	ENST00000449732.6	0.00105536	0.0223862	0.785014	0.239674	6.22905	0.240271	0.027908	0.0582577	0.0152096	0.0582577
RBCK1	ENST00000415942.5	0.00106665	0.0225822	4.01078	1.22566	3.06284	4.75486	1.99396	-0.449941	0.259416	0.259416
FAM204A	ENST00000469758.5	0.00107141	0.0226418	3.52992	1.07913	2.62169	3.88879	1.33104	-0.408504	0.415757	0.415757
PPP1R16A	ENST00000435887.1	0.00107372	0.0226594	4.50784	1.37835	1.89873	5.91194	2.05366	0.520465	0.79612	0.79612
TWIST2	ENST00000612363.2	0.00107543	0.0226608	0.668798	0.204525	4.42319	0.0939094	0.0127006	-0.000546374	0.0500449	0.0500449
FPGS	ENST00000373247.6	0.0010755	0.0226608	0.62624	0.191511	6.87163	0.118687	0.00534208	0.0496726	0.0120609	0.0496726
YIPF3	ENST00000510102.5	0.00107861	0.0227192	3.44616	1.05414	1.82011	4.05976	0.818197	-0.247338	0.848615	0.848615
HERPUD1	ENST00000300302.9	0.0010797	0.0227349	0.724014	0.221486	6.0496	0.18405	0.011933	0.0616511	0.0164529	0.0616511
ZFP91-CNTF	ENST00000389919.8	0.001081	0.0227551	3.94859	1.20806	1.95263	4.11567	1.42765	-1.19057	0.761451	0.761451
INHBE	ENST00000266646.3	0.00108177	0.0227567	1.52567	0.466802	6.9024	0.732271	0.001728	0.325128	0.0119449	0.325128
PPP1CC	ENST00000620030.1	0.00108156	0.0227567	4.27269	1.30727	4.73703	6.51847	1.11109	1.45235	0.0371133	1.45235
NA	ENST00000438665.6	0.00108506	0.022797	3.85879	1.18097	3.05315	4.80095	1.62788	0.464136	0.262466	0.464136
CALCB	ENST00000324229.11	0.00109519	0.022966	0.616609	0.188862	4.62361	0.133972	0.0125409	0.0299809	0.0409626	0.0409626
IFT46	ENST00000264020.6	0.00109608	0.0229774	1.6601	0.508512	4.63475	0.633407	0.347328	-0.23542	0.0405488	0.0405488
MRPL23	ENST00000397297.7	0.00109819	0.0229997	3.14676	0.964056	1.3998	2.66778	0.227732	0.0439243	1.16637	1.16637
ATF5	ENST00000423777.7	0.00109855	0.023	1.17485	0.359943	7.06086	0.439353	0.00105295	0.193285	0.0114042	0.193285
IKBKB	ENST00000648136.1	0.00110532	0.0231256	4.3149	1.32268	2.27535	4.05805	2.0475	-1.7683	0.576704	0.576704
ZSCAN10	ENST00000576483.1	0.0011097	0.0231917	0.764455	0.234414	5.26825	0.194232	0.0116466	0.0707785	0.025868	0.0707785
MYMX	ENST00000573382.2	0.00110981	0.0231917	0.87641	0.268747	4.56587	0.233813	0.0121949	0.0961422	0.0432481	0.0961422
GLIS2	ENST00000433375.1	0.00111122	0.0232065	0.586408	0.179839	5.72102	0.0968345	0.028908	-0.00510102	0.0196051	0.0196051
METTL27	ENST00000297873.9	0.00111458	0.023262	0.732298	0.224639	4.28261	0.19313	0.0171584	0.013272	0.0585359	0.0585359
PPP1R15A	ENST00000200453.6	0.00111657	0.0232888	0.740816	0.227287	6.53771	0.161765	0.00172295	0.0757664	0.0135288	0.0757664
ASF1A	ENST00000511766.2	0.00111638	0.0232888	3.02713	0.928731	3.23367	2.84903	0.671541	0.62227	0.209781	0.62227
POU6F1	ENST00000550824.6	0.0011202	0.0233498	3.17046	0.972995	2.07841	3.01297	0.628217	0.791863	0.684817	0.791863
ACBD6	ENST00000642319.1	0.00112176	0.023375	0.713512	0.218999	5.10626	0.160725	0.0434114	-0.00887786	0.0285293	0.0285293
PAWR	ENST00000552637.1	0.00113678	0.0236284	2.17015	0.666859	3.81282	1.15586	0.563833	-0.295222	0.103219	0.103219
INAVA	ENST00000413687.3	0.00114286	0.023723	0.739113	0.227226	6.61695	0.161214	0.0642924	-0.00775362	0.0131548	0.0131548
SLC43A1	ENST00000278426.8	0.00115454	0.02393	1.10054	0.33864	6.10149	0.43827	0.08085	0.0911653	0.0160664	0.0911653
MSH5	ENST00000416819.6	0.00116085	0.0240382	4.42422	1.362	1.74568	5.46013	1.88219	0.35036	0.900371	0.900371
AC007325.2	ENST00000615165.1	0.00116614	0.0241251	0.608488	0.187398	5.85693	0.125033	0.00851886	0.0441582	0.0181312	0.0441582
VEGFA	ENST00000372067.7	0.00116829	0.0241543	0.773625	0.238294	6.81029	0.203756	0.00676345	0.0784127	0.0123031	0.0784127
FAM86JP	ENST00000484500.5	0.00116948	0.0241714	2.92109	0.899842	1.57397	2.0428	0.187485	0.0924516	1.02709	1.02709
STRA6	ENST00000395105.9	0.00117353	0.0242476	4.01714	1.23786	3.42508	5.64571	1.10204	1.1964	0.164729	1.1964
TLN2	ENST00000494733.5	0.00117804	0.0242952	0.591325	0.182275	6.0383	0.108169	0.0116283	0.0382078	0.0165404	0.0382078
TESMIN	ENST00000432435.2	0.00117965	0.0243198	0.91569	0.282293	4.14601	0.250167	0.050797	0.0303489	0.0687372	0.0687372
SH2D3C	ENST00000420366.5	0.00118285	0.0243641	3.9647	1.22255	3.43014	5.64954	1.3363	0.905635	0.163696	0.905635
LRRC8D	ENST00000337338.9	0.00118447	0.0243855	0.645591	0.199097	5.57867	0.123682	0.03504	0.0244196	0.0214652	0.0244196
PTPN13	ENST00000411767.7	0.0011921	0.0244784	3.31868	1.02404	5.76323	3.88994	1.52132	0.0516726	0.0191172	0.0516726
OBSL1	ENST00000404537.6	0.00119286	0.0244832	0.641586	0.197985	6.06861	0.163454	0.00819456	0.0506024	0.0163085	0.0506024
TCERG1	ENST00000549332.1	0.00119307	0.0244832	5.67465	1.75115	2.98779	9.59614	1.30214	3.29764	0.283596	3.29764
DVL3	ENST00000431765.6	0.00119897	0.0245889	1.11393	0.3439	5.67062	0.283031	0.157173	-0.0924985	0.0202273	0.0202273
C19orf25	ENST00000588871.5	0.00120708	0.0247476	0.651535	0.201265	5.16438	0.126579	0.0332355	0.0239885	0.0275259	0.0275259
NUDT13	ENST00000544879.5	0.00121776	0.0249155	4.15355	1.28407	1.61059	4.93148	1.47403	0.633743	0.999207	0.999207
H1-0	ENST00000340857.3	0.0012209	0.0249459	1.01372	0.313463	9.62405	0.41007	8.24722e-05	0.147306	0.0132086	0.147306
GTF2IP1	ENST00000616377.4	0.0012233	0.0249872	0.606734	0.187646	6.23649	0.234059	0.0376534	0.00571584	0.0151633	0.0151633
TRAPPC6A	ENST00000006275.8	0.00122392	0.0249921	0.714239	0.220905	5.2602	0.173861	0.0196632	0.0535351	0.0259912	0.0535351
SPRY1	ENST00000507703.1	0.00123093	0.0251198	0.671676	0.207845	4.65335	0.104697	0.024923	-0.0059747	0.0398765	0.0398765
CNKSR2	ENST00000647349.1	0.00123228	0.0251395	4.48944	1.38936	1.94655	6.25127	0.934594	1.96088	0.765302	1.96088
ST8SIA5	ENST00000315087.11	0.00123333	0.0251481	0.597009	0.184772	4.97066	0.0967157	0.0200509	0.0172097	0.0311601	0.0311601
PGPEP1	ENST00000596962.5	0.00124596	0.0253717	3.79011	1.17408	1.36352	3.84333	0.870891	0.607684	1.19682	1.19682
ANTXR2	ENST00000307333.7	0.00124887	0.0254075	4.00991	1.24243	1.62768	3.93336	1.3291	-0.403797	0.986348	0.986348
PTRH1	ENST00000543175.4	0.00125419	0.0254921	0.632217	0.19596	4.59507	0.0945445	0.0155385	0.00109628	0.0420618	0.0420618
BATF3	ENST00000243440.2	0.00126116	0.025596	0.740997	0.22979	4.32027	0.162193	0.0231329	0.0553308	0.056072	0.056072
ZNF219	ENST00000360947.8	0.00126114	0.025596	0.704996	0.218625	6.93742	0.263402	0.0223084	0.049387	0.0118174	0.049387
EMILIN2	ENST00000308080.9	0.00126149	0.025596	0.872694	0.270636	4.12524	0.199928	0.0393932	0.0363418	0.0704728	0.0704728
TDGF1P3	ENST00000493351.1	0.00126125	0.025596	0.808886	0.250844	4.48468	0.148823	0.0474792	-0.0284322	0.046905	0.046905
TRIB3	ENST00000449710.5	0.00126864	0.0256834	3.09497	0.960282	1.58886	2.13965	0.367523	-0.00614808	1.01569	1.01569
GGNBP2	ENST00000621686.2	0.00127345	0.0257414	5.18782	1.61017	2.17104	7.5519	3.25673	-0.134923	0.632262	0.632262
MTA1	ENST00000481206.1	0.00128077	0.025842	0.964667	0.299562	4.28524	0.33651	0.0226836	0.111923	0.058359	0.111923
OPTN	ENST00000378747.8	0.00128504	0.0259202	4.09187	1.27104	1.545	4.66343	1.37384	0.547384	1.04949	1.04949
AC092032.3	ENST00000404404.5	0.00129915	0.026149	1.01439	0.315403	5.12875	0.311361	0.084817	0.0644013	0.0281336	0.0644013
MZF1	ENST00000599369.5	0.00130333	0.0262093	3.4642	1.07743	3.25264	4.29146	0.907707	0.833579	0.204796	0.833579
DMKN	ENST00000462721.5	0.00130923	0.0262879	0.617921	0.192262	5.61561	0.164261	0.0160297	0.0394175	0.0209593	0.0394175
CITED4	ENST00000372638.3	0.00131617	0.0263881	0.623751	0.194168	4.64058	0.11675	0.0100572	0.0464945	0.0403356	0.0464945
RTN4	ENST00000402434.6	0.00132226	0.0264852	3.88915	1.21115	5.06685	5.46749	1.68173	0.518611	0.029248	0.518611
SEMA4B	ENST00000411539.6	0.00132747	0.0265499	0.702533	0.218859	6.7938	0.146476	0.0463796	0.0254695	0.0123708	0.0254695
GEMIN7	ENST00000591747.5	0.00133554	0.0266624	0.836932	0.26087	4.51192	0.237828	0.0302125	0.0718675	0.0456181	0.0718675
CSF1	ENST00000329608.11	0.00134108	0.0267649	0.732527	0.228412	4.26339	0.127148	0.0184088	-0.0133314	0.0598495	0.0598495
HIRIP3	ENST00000563053.1	0.00134454	0.0268098	3.69989	1.15395	1.2155	3.75045	0.670992	0.896971	1.32639	1.32639
GSE1	ENST00000253458.12	0.00134522	0.0268152	0.689325	0.215001	7.49228	0.209686	0.0205291	0.0488088	0.0103642	0.0488088
BAIAP2L2	ENST00000381669.8	0.00135238	0.0269093	1.51597	0.473057	4.57448	0.72458	0.292783	-0.0916381	0.0428916	0.0428916
PFN2	ENST00000475518.5	0.0013622	0.0269992	3.36496	1.05072	1.71504	3.42187	0.733769	-0.58197	0.922238	0.922238
GCK	ENST00000336642.8	0.00136078	0.0269992	0.738123	0.230459	4.27445	0.133465	0.0205781	0.0210735	0.0590887	0.0590887
SAMD12	ENST00000524796.6	0.00138267	0.0273394	2.69109	0.841427	2.16108	2.8122	0.366181	0.695818	0.637755	0.695818
GFRA1	ENST00000369234.4	0.00138733	0.0273973	3.27938	1.02568	2.49181	3.54422	1.00598	0.57205	0.471644	0.57205
WIPF1	ENST00000359761.7	0.00138808	0.0273973	3.9501	1.23552	1.45525	3.82707	1.16895	0.032989	1.12082	1.12082
TRIB3	ENST00000217233.8	0.00138783	0.0273973	1.09869	0.343644	6.23482	0.462504	0.00252963	0.174607	0.0151737	0.174607
CCDC32	ENST00000559153.5	0.00139485	0.0274981	4.04834	1.2668	1.49864	4.39769	1.32122	0.360808	1.08596	1.08596
MGRN1	ENST00000415496.5	0.00139591	0.02751	0.658452	0.206056	4.86292	0.166775	0.022604	0.0410848	0.0336343	0.0410848
KLC1	ENST00000555467.1	0.00140624	0.0276648	3.68982	1.15546	1.4432	4.24585	0.773914	1.22873	1.13062	1.22873
FADS3	ENST00000529404.5	0.00140762	0.0276837	1.05346	0.329919	4.36459	0.236629	0.109917	-0.0721672	0.0533533	0.0533533
ADAMTS10	ENST00000595838.5	0.00141249	0.0277549	3.8698	1.21231	1.37559	3.91707	1.01791	0.407271	1.18663	1.18663
NFE2L1	ENST00000361665.7	0.00142197	0.0279161	0.709131	0.222287	7.72069	0.156657	0.00926073	0.0648568	0.0100419	0.0648568
ECHDC1	ENST00000474289.6	0.00143104	0.0280527	1.51029	0.473697	4.57252	0.664397	0.29361	0.0216668	0.0429724	0.0429724
RERE	ENST00000377464.5	0.00143196	0.0280624	0.841571	0.26397	7.04413	0.219431	0.0317892	0.0727313	0.011457	0.0727313
TMX2	ENST00000529403.1	0.00144338	0.0282193	1.30827	0.410653	5.13407	0.526775	0.114311	0.138642	0.0280413	0.138642
ZNF90	ENST00000469078.5	0.00144723	0.0282397	0.936444	0.294011	6.02881	0.263485	0.00936315	0.120301	0.0166147	0.120301
CHN1	ENST00000488080.6	0.00144741	0.0282397	3.73526	1.17276	3.191	5.09381	1.84165	-0.0775567	0.221395	0.221395
MYL5	ENST00000506838.5	0.00144721	0.0282397	0.862444	0.270777	4.04789	0.285688	0.0325891	0.0590492	0.0773914	0.0773914
HLA-A	ENST00000639891.1	0.00144741	0.0282397	0.596451	0.187267	5.31319	0.249871	0.0220403	0.0305632	0.0251923	0.0305632
UPP1	ENST00000444999.5	0.00144989	0.0282797	1.20866	0.379542	4.45615	0.402327	0.167758	-0.101725	0.0483205	0.0483205
ZNF365	ENST00000395254.8	0.0014507	0.0282869	1.24103	0.389727	3.93733	0.427273	0.13923	0.0206056	0.0886001	0.0886001
RELL2	ENST00000444782.5	0.00145142	0.0282869	0.83754	0.263028	5.05061	0.271153	0.0742212	-0.0012417	0.0295543	0.0295543
NA	ENST00000398137.5	0.0014678	0.0285364	5.00653	1.5739	2.42804	7.62056	2.63671	1.07902	0.501084	1.07902
GRPEL2	ENST00000416916.2	0.00149345	0.0289331	3.1028	0.976965	2.12346	2.88759	0.772841	-0.0758707	0.658851	0.658851
ASB3	ENST00000482829.5	0.00149515	0.0289576	4.43938	1.39796	2.24432	5.90694	2.33852	-0.935243	0.592908	0.592908
TBL3	ENST00000615855.4	0.00151274	0.0292023	0.761804	0.240148	4.97337	0.140623	0.0554036	-0.0173853	0.0311028	0.0311028
CSRP1	ENST00000367306.5	0.0015191	0.0292454	1.29792	0.409308	4.28642	0.516253	0.193019	0.0028307	0.0582803	0.0582803
KMT5A	ENST00000537270.1	0.00151929	0.0292454	2.35908	0.743962	2.08333	1.82383	0.148273	0.418962	0.681946	0.681946
DPP3	ENST00000531863.5	0.00152231	0.0292693	3.56428	1.12424	2.88466	4.26245	1.02073	0.87513	0.318534	0.87513
SYMPK	ENST00000598364.1	0.00153866	0.0295151	1.10865	0.350032	4.29675	0.388529	0.126189	0.0381969	0.0575943	0.0575943
PLD3	ENST00000409735.9	0.00154411	0.0295784	0.727418	0.22974	7.06024	0.207864	0.0677648	-0.0278974	0.0114061	0.0114061
AC003005.1	ENST00000601674.6	0.00154598	0.0295784	2.82708	0.892975	1.98279	2.50948	0.453579	0.332721	0.742528	0.742528
SESN2	ENST00000253063.4	0.00154519	0.0295784	0.937116	0.295988	7.05849	0.268613	0.000529484	0.130884	0.0114116	0.130884
SESN2	ENST00000645231.2	0.00154519	0.0295784	0.937116	0.295988	7.05849	0.268613	0.000529484	0.130884	0.0114116	0.130884
KLK10	ENST00000601467.1	0.00154701	0.0295816	0.802324	0.253442	4.29211	0.226479	0.0384479	0.0242489	0.057901	0.057901
SELENOO	ENST00000380903.7	0.00154704	0.0295816	0.639211	0.201917	4.89046	0.13702	0.0235898	0.037566	0.0329631	0.037566
NLRP12	ENST00000324134.10	0.00156025	0.029791	0.967553	0.305874	6.14772	0.354731	0.0176924	0.122646	0.0157416	0.122646
RHPN1	ENST00000522899.1	0.00156161	0.0298085	0.980129	0.309875	4.79038	0.29755	0.016831	0.127202	0.03555	0.127202
AJUBA	ENST00000262713.7	0.00156501	0.029839	0.721637	0.228196	7.49577	0.221549	0.00122675	0.0768836	0.0103582	0.0768836
C15orf61	ENST00000342683.6	0.0015657	0.0298434	0.794326	0.251192	4.10278	0.179195	0.0222398	0.049403	0.0724066	0.0724066
TMEM248	ENST00000607045.5	0.00156635	0.0298473	3.1008	0.980613	1.9638	2.61669	0.688004	0.286056	0.7544	0.7544
FSTL1	ENST00000469005.1	0.0015679	0.0298683	1.95705	0.618965	4.44451	1.42823	0.525758	-0.174334	0.0489187	0.0489187
RPS8	ENST00000497035.5	0.00157119	0.0299136	2.89979	0.917307	1.94231	2.49372	0.494176	0.334875	0.768002	0.768002
PATZ1	ENST00000405309.7	0.00158234	0.0300962	1.30537	0.413204	5.51023	0.468435	0.233703	-0.107439	0.0224031	0.0224031
CPAMD8	ENST00000596224.5	0.00158977	0.0302153	3.34244	1.05848	2.73459	3.86896	0.831641	0.848925	0.371695	0.848925
RALGPS2	ENST00000477383.5	0.00159693	0.0303164	3.58328	1.13522	1.6467	3.48146	0.960908	-0.430521	0.972168	0.972168
ADNP	ENST00000396032.8	0.0015994	0.0303546	0.70563	0.223582	6.92863	0.246796	0.0366835	0.0383002	0.011849	0.0383002
PCDHB5	ENST00000623915.1	0.00160492	0.0304507	3.54874	1.12479	1.79716	4.15781	1.03337	-0.17571	0.864367	0.864367
PDIA3	ENST00000469684.1	0.00161515	0.0306096	1.20638	0.382595	3.43905	0.340669	0.0576672	-0.0122978	0.161901	0.161901
ZFYVE9	ENST00000287727.7	0.00161646	0.0306256	0.759945	0.241029	6.42263	0.214292	0.033778	0.0533644	0.0141058	0.0533644
C15orf41	ENST00000642817.1	0.00162134	0.0307093	3.95382	1.25437	3.03223	4.95367	0.816813	1.54334	0.26913	1.54334
RHPN2	ENST00000588388.5	0.00162536	0.0307592	3.78553	1.20125	2.79556	4.44012	1.81487	-0.814795	0.349644	0.349644
PRICKLE1	ENST00000345127.9	0.00163329	0.0308827	4.19976	1.3333	1.68758	5.30889	1.72444	0.707958	0.942107	0.942107
NOXA1	ENST00000341349.6	0.00168317	0.031636	2.46675	0.785315	2.64508	2.25848	0.329491	0.595588	0.406283	0.595588
ELAC1	ENST00000269466.8	0.00169166	0.0317594	0.64926	0.206796	4.48771	0.143175	0.0149721	0.0491745	0.0467587	0.0491745
SRP9	ENST00000626563.2	0.00169368	0.0317793	1.88807	0.601434	4.6225	1.02435	0.50158	-0.426764	0.0410043	0.0410043
EEF2KMT	ENST00000585975.5	0.00169616	0.0318015	2.54914	0.812129	2.11723	2.63503	0.321061	0.668268	0.662395	0.668268
TBL2	ENST00000488915.1	0.0016963	0.0318015	2.87627	0.916356	2.0988	2.78471	0.586595	0.277965	0.672966	0.672966
PIGBOS1	ENST00000436697.3	0.00173769	0.0324303	0.658836	0.210373	4.50477	0.171347	0.0204358	0.0426863	0.0459495	0.0459495
SLC25A6	ENST00000475167.6	0.00173882	0.0324417	1.71561	0.547845	4.47178	0.819101	0.402665	-0.0556018	0.0475365	0.0475365
BAIAP2	ENST00000575245.5	0.00175345	0.0326416	3.86846	1.23629	1.68997	3.48809	1.35225	-1.04722	0.940365	0.940365
FUT1	ENST00000645652.1	0.00175999	0.0327449	0.728326	0.232841	6.21815	0.160565	0.017208	0.0641142	0.0152782	0.0641142
TMEM30B	ENST00000557163.1	0.00176408	0.0327629	3.41858	1.09313	1.74088	3.67722	0.888638	-0.4831	0.903772	0.903772
IDH1	ENST00000415913.5	0.00176272	0.0327629	1.28136	0.409701	5.75952	0.601777	0.217449	0.0343331	0.019159	0.0343331
INHBC	ENST00000309668.3	0.00178527	0.0330479	1.13653	0.363827	3.42397	0.298765	0.0336004	0.0319577	0.164955	0.164955
TUSC1	ENST00000358022.4	0.0017895	0.0331078	0.811452	0.259822	4.00938	0.217467	0.0201469	0.0494686	0.081114	0.081114
IFNGR2	ENST00000290219.10	0.00180091	0.0332817	0.785474	0.251654	4.59776	0.154627	0.0530393	-0.00260661	0.0419557	0.0419557
ADK	ENST00000541550.5	0.00181448	0.0334483	0.991211	0.317795	4.41337	0.268465	0.100913	-0.0545471	0.0505769	0.0505769
ATP13A1	ENST00000357324.11	0.00181415	0.0334483	0.66088	0.211883	6.759	0.15016	0.0117209	0.0556205	0.0125174	0.0556205
SDCBP2	ENST00000381808.7	0.00181746	0.0334603	0.985691	0.316074	3.99561	0.281836	0.067362	-0.0109075	0.0824922	0.0824922
PHGDH	ENST00000641213.1	0.00181766	0.0334603	4.61305	1.47925	1.89236	6.62686	2.06622	1.21603	0.800289	1.21603
UPP1	ENST00000331803.8	0.00183247	0.0337049	3.12593	1.00315	3.29163	3.00953	0.546694	0.962769	0.194906	0.962769
BBC3	ENST00000439096.2	0.00183865	0.0337809	1.48275	0.475985	5.09847	0.582981	0.311174	-0.169052	0.0286688	0.0286688
DPYSL2	ENST00000523027.1	0.00187521	0.0342812	3.78829	1.21837	4.80232	5.65158	1.33883	0.887797	0.0352188	0.887797
KDELR3	ENST00000409006.3	0.00188055	0.034341	1.70876	0.54971	3.16243	0.592892	0.223798	-0.193828	0.229474	0.229474
NPAS1	ENST00000439365.6	0.00188258	0.0343685	0.837863	0.269569	4.76194	0.365076	0.0365465	0.0724548	0.0363656	0.0724548
PVR	ENST00000344956.8	0.00188341	0.0343741	1.09606	0.352655	4.79907	0.416888	0.145167	0.0413811	0.0353083	0.0413811
C16orf86	ENST00000403458.9	0.00188726	0.0344065	2.81862	0.907059	1.96761	2.46661	0.48213	0.634975	0.752005	0.752005
SCN1B	ENST00000262631.11	0.00189134	0.0344524	0.909948	0.292891	4.31061	0.188781	0.071987	-0.0550962	0.0566904	0.0566904
IRF3	ENST00000598808.5	0.0018977	0.0345112	4.13497	1.33137	1.65082	5.05186	1.68971	0.542282	0.969115	0.969115
CCNC	ENST00000627680.2	0.00189916	0.0345282	0.702525	0.226215	4.5785	0.196668	0.0340326	0.0329236	0.042727	0.042727
CNNM3	ENST00000377060.7	0.00190455	0.0346168	3.69006	1.18853	3.10566	4.83735	0.336342	1.78257	0.246217	1.78257
MICALL2	ENST00000297508.8	0.00191957	0.0348037	0.772537	0.249012	4.40044	0.174845	0.0417197	0.00746378	0.0512911	0.0512911
CIZ1	ENST00000372938.10	0.0019263	0.0348875	0.667077	0.215091	6.28987	0.135694	0.043457	0.0259394	0.0148408	0.0259394
CXCL3	ENST00000296026.4	0.00192952	0.0349363	0.643366	0.207479	4.5877	0.317855	0.0147031	0.0498682	0.0423553	0.0498682
PRSS8	ENST00000564025.1	0.00193386	0.0350052	3.98812	1.2864	1.25119	3.63329	1.18791	-0.327209	1.29434	1.29434
SPAST	ENST00000644408.1	0.00196521	0.0354466	4.75614	1.5365	1.74206	4.83618	2.63831	-1.85508	0.902939	0.902939
RAN	ENST00000392369.6	0.00196738	0.0354761	0.951314	0.30736	6.54306	0.276702	0.0648658	0.0768395	0.013503	0.0768395
ABCA2	ENST00000487109.5	0.00196928	0.0355008	3.98674	1.28819	2.00287	4.28561	1.75905	-1.49957	0.730118	0.730118
PLPP2	ENST00000269812.7	0.00198201	0.0356562	4.56407	1.47565	1.99639	6.72913	0.54142	2.7249	0.734105	2.7249
TPTEP2	ENST00000455209.5	0.00198222	0.0356562	0.783096	0.253193	4.1344	0.198534	0.0219323	0.0742276	0.069701	0.0742276
TM9SF2	ENST00000627052.2	0.00198285	0.0356579	3.06186	0.989998	1.22423	2.15606	0.151642	-0.0686699	1.3185	1.3185
CMBL	ENST00000506821.1	0.00199625	0.0358598	0.900869	0.291469	4.59211	0.195074	0.085252	-0.0323598	0.0421791	0.0421791
RMDN1	ENST00000430676.6	0.00199791	0.03588	0.828305	0.268013	4.82139	0.188234	0.0730432	-0.0154212	0.0347032	0.0347032
SDR39U1	ENST00000555365.5	0.00202443	0.0362872	3.08768	1.00034	2.45363	3.45405	1.01191	0.0117517	0.489116	0.489116
TMEM219	ENST00000575829.6	0.00202799	0.0363274	0.990426	0.320931	4.40148	0.366652	0.101813	0.0526827	0.0512331	0.0526827
UQCR11	ENST00000589880.1	0.00203152	0.0363608	0.628469	0.203679	5.4949	0.21445	0.0203765	0.0418513	0.0226142	0.0418513
SLC37A4	ENST00000650539.1	0.00203309	0.0363736	3.06447	0.993231	2.4497	3.27592	0.815006	0.664755	0.49094	0.664755
RPL13	ENST00000491523.5	0.00203651	0.0364052	0.696816	0.225883	4.89852	0.215344	0.0437624	0.00590725	0.0327722	0.0327722
ANKRD9	ENST00000560748.5	0.002046	0.0365353	1.70884	0.554193	3.57211	0.731594	0.322698	-0.161366	0.137997	0.137997
SARS1	ENST00000482384.1	0.00204679	0.0365396	0.933933	0.302895	4.73529	0.270695	0.0101469	0.127471	0.0371669	0.127471
STX6	ENST00000542060.5	0.00204787	0.0365489	1.12781	0.365792	4.34153	0.326051	0.145962	-0.0379267	0.054744	0.054744
STC2	ENST00000265087.8	0.00205013	0.0365794	0.795075	0.257901	8.51603	0.215022	0.000246079	0.099523	0.010027	0.099523
IRF3	ENST00000602190.1	0.00205131	0.0365832	3.68314	1.19478	1.46603	4.37643	0.859431	1.28181	1.11209	1.28181
CEBPG	ENST00000652630.1	0.00209179	0.0371034	0.775135	0.251922	6.34145	0.186752	0.0196676	0.0755297	0.0145448	0.0755297
GADD45B	ENST00000215631.9	0.00210179	0.037227	0.730717	0.237596	5.08992	0.258303	0.00791196	0.0767659	0.0288233	0.0767659
UBE2QL1	ENST00000399816.4	0.00210418	0.037248	0.908184	0.295333	4.29372	0.253831	0.0171172	0.113715	0.0577945	0.113715
PPP2R5C	ENST00000554147.1	0.00210574	0.0372503	3.57983	1.16421	1.71159	3.64651	1.10836	-0.584176	0.924718	0.924718
ATP8B1	ENST00000648908.1	0.00211406	0.0373275	2.86064	0.930677	2.39874	2.59245	0.765455	0.533785	0.515044	0.533785
CHAC1	ENST00000617768.5	0.00213441	0.0376166	1.47373	0.479909	7.53928	0.686113	0.00106649	0.344402	0.0102857	0.344402
SNRNP70	ENST00000401730.5	0.00214132	0.0377112	0.879091	0.286358	4.94759	0.398407	0.0265903	0.0964113	0.0316572	0.0964113
HDAC6	ENST00000643374.1	0.00214149	0.0377112	4.36317	1.42128	3.51193	6.05517	2.88191	-0.349508	0.148161	0.148161
CAAP1	ENST00000495958.5	0.00216554	0.0380286	3.60783	1.17652	1.17839	3.24891	0.716004	0.348057	1.36028	1.36028
SUZ12P1	ENST00000579526.5	0.00218265	0.0382022	0.91482	0.298553	3.916	0.314559	0.0427511	0.0098071	0.0909494	0.0909494
PLXNA2	ENST00000367033.4	0.00218499	0.038233	0.608762	0.198691	4.8204	0.113963	0.00908965	0.0501275	0.0347298	0.0501275
NA	ENST00000335686.9	0.00219295	0.0383115	2.69111	0.878651	2.99878	2.42932	0.79204	0.366002	0.279982	0.366002
SLC35F1	ENST00000360388.9	0.00219783	0.0383838	0.747641	0.244159	5.43275	0.302012	0.0401389	0.0492812	0.0234763	0.0492812
ATF3	ENST00000341491.9	0.00220764	0.0384564	1.24883	0.408009	6.90429	0.496063	0.00374598	0.245961	0.0119379	0.245961
BZW2	ENST00000446596.5	0.00220707	0.0384564	4.52867	1.47954	2.1583	5.06071	2.64428	-2.05798	0.639298	0.639298
CCNL2	ENST00000505849.5	0.00222199	0.0386444	3.71942	1.21596	1.65273	3.54417	1.25014	-0.692164	0.967699	0.967699
C17orf113	ENST00000587304.2	0.00222496	0.0386564	0.783487	0.256173	4.44971	0.189864	0.0131428	0.0852938	0.04865	0.0852938
ATP5F1D	ENST00000215375.7	0.00222983	0.03868	0.983904	0.321771	6.26386	0.310707	0.140309	-0.0591527	0.0149958	0.0149958
RB1	ENST00000531171.5	0.00224228	0.0388553	3.05146	0.998478	2.03364	2.69137	0.784034	0.0299147	0.711403	0.711403
B2M	ENST00000557901.5	0.00226162	0.0391186	3.44801	1.12919	3.13601	4.88693	0.394261	1.51833	0.237155	1.51833
B2M	ENST00000633158.1	0.00226162	0.0391186	3.44801	1.12919	3.13601	4.88693	0.394261	1.51833	0.237155	1.51833
FGD5	ENST00000285046.9	0.00227571	0.0393213	0.585574	0.191886	6.84585	0.106128	0.00867177	0.0465588	0.0121608	0.0465588
RNF167	ENST00000575111.5	0.00227684	0.0393252	1.16018	0.380197	6.35369	0.270384	0.202347	-0.181567	0.0144766	0.0144766
DGKZ	ENST00000527911.5	0.0022876	0.0394649	1.03316	0.338729	5.25793	0.262066	0.14608	-0.124084	0.0260263	0.0260263
CHKB	ENST00000406938.2	0.00229607	0.0396007	0.921685	0.302291	4.75695	0.255995	0.100557	-0.0243436	0.0365129	0.0365129
SPCS3	ENST00000513139.1	0.00229965	0.0396313	2.67042	0.875971	3.76395	2.70157	0.701701	0.449286	0.109568	0.449286
ERP29	ENST00000455836.1	0.00230432	0.0396663	1.15155	0.377815	6.04644	0.409274	0.0344354	0.179681	0.0164773	0.179681
MEF2B	ENST00000409224.5	0.00230651	0.0396876	2.15979	0.708678	3.47616	1.45833	0.413363	0.339974	0.154694	0.339974
MZT2B	ENST00000480182.1	0.00231341	0.0397569	0.690914	0.226772	4.90971	0.158964	0.0446276	-0.00117726	0.0325106	0.0325106
SUN1	ENST00000401592.6	0.00231355	0.0397569	0.61293	0.201177	6.20381	0.106451	0.0453386	-0.0047827	0.0153697	0.0153697
GLI3	ENST00000479210.1	0.00231932	0.0398354	4.07676	1.33841	1.8191	4.17131	1.83771	-1.10461	0.849304	0.849304
MPZL1	ENST00000474859.5	0.00233821	0.0400455	0.702076	0.230678	5.07715	0.116747	0.0507617	-0.0321483	0.0290568	0.0290568
ZNF362	ENST00000539719.6	0.00235103	0.0402099	0.939543	0.308869	5.41431	0.32638	0.086161	0.056939	0.0237352	0.056939
ASIC2	ENST00000359872.6	0.00237111	0.0404623	0.872122	0.286946	4.07781	0.407791	0.0197226	0.103784	0.0746285	0.103784
SAMD1	ENST00000269724.5	0.00237218	0.0404702	0.628489	0.206795	5.34667	0.12397	0.0227587	0.0413877	0.0247013	0.0413877
ZFYVE28	ENST00000290974.6	0.00237543	0.0405151	0.890575	0.29307	4.13431	0.291609	0.0430371	0.0857983	0.069709	0.0857983
TBX6	ENST00000395224.6	0.00238655	0.0406734	3.59106	1.18229	3.23134	4.79048	1.56015	0.536579	0.2104	0.536579
MAGEA2B	ENST00000467743.1	0.00238908	0.040706	0.800913	0.263714	4.18586	0.20735	0.0305841	0.0737337	0.0655483	0.0737337
MEMO1	ENST00000407893.3	0.00239697	0.0408195	1.2713	0.418735	3.69357	0.424931	0.143669	0.0138662	0.119339	0.119339
TMEM41B	ENST00000527813.5	0.00241969	0.0411746	3.05861	1.00838	2.46999	3.39057	0.96918	0.556053	0.481571	0.556053
MXRA8	ENST00000309212.10	0.00242495	0.0412216	0.867283	0.285991	4.63064	0.284513	0.0819857	-0.00616785	0.0407006	0.0407006
PSPH	ENST00000427797.5	0.00243463	0.0413332	1.10604	0.364867	4.70304	0.487482	0.161506	0.0251177	0.0381867	0.0381867
RGS3	ENST00000485822.1	0.00244203	0.0414375	0.644353	0.212628	4.56672	0.128808	0.0203352	0.0474805	0.043213	0.0474805
ZBTB14	ENST00000615385.4	0.00244452	0.0414585	3.77045	1.24432	3.10781	4.60345	0.98278	1.33972	0.245569	1.33972
MARCHF9	ENST00000266643.6	0.00247617	0.0419092	0.652803	0.215714	4.45301	0.202718	0.0213183	0.0245137	0.0484807	0.0484807
PTPN5	ENST00000358540.7	0.00247795	0.0419254	0.758148	0.250543	5.55124	0.158712	0.0723169	-0.0224054	0.0218407	0.0218407
RPL32P3	ENST00000510078.5	0.00247839	0.0419254	1.07525	0.35534	4.96221	0.360019	0.0486837	0.140716	0.0313404	0.140716
PRMT2	ENST00000397638.6	0.00248073	0.0419543	3.67962	1.21613	4.54031	4.80553	1.11509	1.10336	0.0443415	1.10336
DLL3	ENST00000356433.9	0.00249413	0.0421162	0.775158	0.256331	4.92	0.20982	0.0212406	0.0773176	0.0322742	0.0773176
PCK2	ENST00000557969.1	0.00250078	0.0421747	1.0203	0.337485	3.72001	0.309764	0.0552642	0.0796459	0.11558	0.11558
SHROOM3	ENST00000646790.1	0.00250008	0.0421747	0.610591	0.20196	6.75907	0.116352	0.00600637	0.0551751	0.0125171	0.0551751
PCK2	ENST00000644361.1	0.00250078	0.0421747	1.0203	0.337485	3.72001	0.309764	0.0552642	0.0796459	0.11558	0.11558
SNIP1	ENST00000493916.1	0.00250077	0.0421747	3.09307	1.0231	1.90306	2.63713	0.776793	-0.0919765	0.793296	0.793296
PLEKHA8	ENST00000622102.4	0.00250298	0.042201	0.592876	0.196123	5.19948	0.123162	0.0222335	0.0354628	0.0269483	0.0354628
TMEM175	ENST00000264771.9	0.00250706	0.0422376	2.92397	0.967403	3.10254	3.05072	1.15664	-0.0360751	0.247165	0.247165
RB1CC1	ENST00000517963.1	0.00251316	0.042322	2.91545	0.96482	1.85349	2.40583	0.570268	0.260461	0.826048	0.826048
TLK2	ENST00000346027.9	0.00251459	0.0423321	0.587285	0.194363	6.45559	0.148231	0.0427301	-0.0275395	0.0139357	0.0139357
PHF19	ENST00000373896.8	0.00251564	0.042336	0.598919	0.198222	6.51627	0.138906	0.0179635	0.0409745	0.013633	0.0409745
FBXO3	ENST00000448981.6	0.00252128	0.0423907	0.670014	0.221802	4.92647	0.170175	0.041667	0.0288623	0.0321272	0.0321272
C8orf82	ENST00000534680.5	0.00253028	0.0424989	0.603077	0.199714	4.76029	0.0849961	0.0234145	-0.0173316	0.0364143	0.0364143
GPRC5C	ENST00000582473.2	0.00253574	0.0425798	1.23496	0.409058	3.31386	0.447364	0.0615108	0.140284	0.189482	0.189482
NT5C	ENST00000578095.1	0.00253739	0.0425967	2.41542	0.800114	2.36894	2.0537	0.430758	0.164679	0.529516	0.529516
MLXIP	ENST00000538061.1	0.00254103	0.0426038	3.14321	1.04135	1.09208	2.87744	0.185254	1.0445	1.44134	1.44134
NA	ENST00000628565.1	0.00254103	0.0426038	3.14321	1.04135	1.09208	2.87744	0.185254	1.0445	1.44134	1.44134
NFYC	ENST00000372652.5	0.00255129	0.0427326	0.971065	0.321844	5.85697	0.294118	0.0178031	0.137572	0.0181308	0.137572
WSCD1	ENST00000571494.1	0.00255586	0.0427873	0.849631	0.281647	4.99277	0.211726	0.0882892	0.00241664	0.0306986	0.0306986
MED24	ENST00000394127.6	0.00255881	0.042794	3.55591	1.1789	4.54167	4.31345	2.04041	-0.104392	0.044282	0.044282
LRRC8D	ENST00000525774.5	0.00256031	0.0427969	2.80898	0.931323	3.21356	2.61003	0.0844878	1.21656	0.215186	1.21656
PPCDC	ENST00000563393.1	0.00259162	0.0431785	0.614596	0.20402	4.98167	0.134005	0.0315074	0.02835	0.0309287	0.0309287
TMEM70	ENST00000416961.6	0.00259337	0.0431838	0.747823	0.248262	5.28214	0.174203	0.0273161	0.0651352	0.0256569	0.0651352
DUT	ENST00000558978.5	0.002611	0.0433971	0.657246	0.218342	4.89152	0.136403	0.0385718	0.00506347	0.0329378	0.0329378
FOSL2	ENST00000264716.9	0.00261221	0.0434013	0.661767	0.219854	5.11417	0.181223	0.0441146	-1.12504e-05	0.028389	0.028389
ANKRD10	ENST00000465753.1	0.00264372	0.0437696	2.65524	0.8832	2.72149	2.35786	0.397615	0.772448	0.376589	0.772448
RAI1	ENST00000353383.6	0.0026404	0.0437696	0.705489	0.234634	4.31848	0.153165	0.0263932	0.0230568	0.0561862	0.0561862
TMC6	ENST00000588792.5	0.0026443	0.0437696	2.35275	0.7826	2.77296	1.43071	0.561018	-0.249519	0.357677	0.357677
SURF6	ENST00000468290.1	0.00264392	0.0437696	0.881298	0.293144	4.0535	0.2576	0.0520353	-0.0399281	0.0768649	0.0768649
SURF6	ENST00000628950.1	0.00264392	0.0437696	0.881298	0.293144	4.0535	0.2576	0.0520353	-0.0399281	0.0768649	0.0768649
REPIN1	ENST00000489432.6	0.00266848	0.0440946	1.63568	0.544582	4.65672	0.668727	0.405097	-0.331954	0.0397572	0.0397572
FGFR3	ENST00000260795.7	0.00267202	0.0441401	3.79988	1.2653	2.63392	5.14207	1.99069	-1.11476	0.410782	0.410782
SLC16A5	ENST00000450736.6	0.00267622	0.0441983	0.603614	0.201026	5.07012	0.0983538	0.03143	0.00698845	0.029187	0.029187
BCAR3	ENST00000260502.11	0.00269894	0.0445181	0.854511	0.284828	5.37885	0.308814	0.0910164	0.0306739	0.024238	0.0306739
OXLD1	ENST00000571092.1	0.00270642	0.0445969	2.76773	0.922808	2.08417	2.6558	0.595902	0.603097	0.681459	0.681459
ETV1	ENST00000443137.5	0.00270604	0.0445969	3.94574	1.31555	3.4963	4.93138	1.37161	1.22442	0.150965	1.22442
CAPN2	ENST00000434648.5	0.00272259	0.0447964	3.09893	1.03386	1.57576	3.14148	0.577578	-0.342554	1.02572	1.02572
LDHD	ENST00000450168.2	0.0027271	0.0448261	3.50214	1.16857	2.81455	4.17323	0.342744	1.7056	0.342982	1.7056
FAM3A	ENST00000322269.10	0.00273277	0.0449081	4.20925	1.40482	1.66397	5.31037	2.00087	0.45891	0.959396	0.959396
ZNF425	ENST00000378061.7	0.00273555	0.0449426	0.788312	0.263122	6.40232	0.202937	0.00208822	0.101762	0.0142129	0.101762
TCF7L2	ENST00000352065.10	0.00274986	0.0451105	4.51153	1.50666	1.93524	6.68035	2.61703	0.787994	0.772515	0.787994
RAB4A	ENST00000481981.1	0.00276006	0.0452442	1.56588	0.523135	3.95938	0.824181	0.32427	-0.0426799	0.0862351	0.0862351
PCBP3	ENST00000400305.5	0.00279866	0.0457748	3.28577	1.09928	2.8455	4.07751	1.24025	0.572362	0.33215	0.572362
LAX1	ENST00000367215.1	0.00280071	0.045797	2.7704	0.926926	1.90786	2.41117	0.498619	0.0961762	0.790169	0.790169
H3C6	ENST00000634733.1	0.00282412	0.0460661	0.699998	0.234406	4.21587	0.158282	0.0191551	0.0605597	0.0632644	0.0632644
SURF1	ENST00000371974.8	0.0028313	0.0461364	0.600508	0.201143	5.08346	0.138829	0.0317464	0.0223899	0.0289411	0.0289411
SURF1	ENST00000626663.3	0.0028313	0.0461364	0.600508	0.201143	5.08346	0.138829	0.0317464	0.0223899	0.0289411	0.0289411
NFE2L1	ENST00000582155.5	0.00283793	0.0462115	1.32073	0.442489	6.52884	0.622318	0.0776807	0.216015	0.0135717	0.216015
SNX3	ENST00000368979.6	0.00283972	0.046218	1.37735	0.461488	4.93976	0.443111	0.287627	-0.249906	0.0318299	0.0318299
PCDHA8	ENST00000378123.4	0.0028509	0.0463209	0.734577	0.246224	4.30211	0.22023	0.0161633	0.0747758	0.0572427	0.0747758
KBTBD11	ENST00000320248.4	0.00286656	0.046482	3.77111	1.26475	3.24732	5.30502	1.72991	0.669484	0.206183	0.669484
APOBEC3D	ENST00000216099.13	0.00287737	0.0466243	0.667417	0.223925	5.12857	0.1215	0.0470767	-0.0154999	0.0281367	0.0281367
CHP1	ENST00000560784.5	0.00288061	0.0466653	3.71921	1.24797	1.95245	2.99691	1.5746	-1.07925	0.76156	0.76156
KCNC4	ENST00000469655.5	0.00288181	0.0466733	0.764848	0.256654	4.7606	0.192034	0.0506153	0.0481917	0.0364053	0.0481917
TEAD4	ENST00000536826.1	0.00291757	0.0470796	3.32938	1.11863	1.16659	3.27871	0.505837	0.980461	1.37117	1.37117
CCNB1IP1	ENST00000437553.6	0.0029195	0.0470992	3.38373	1.13697	3.18172	5.03022	0.894987	1.04407	0.223993	1.04407
SRP68	ENST00000539137.5	0.00292292	0.0471176	4.82432	1.62122	4.311	8.19628	0.90777	3.03478	0.0566653	3.03478
FOXP1	ENST00000649596.1	0.00292846	0.0471749	3.67982	1.23685	1.95897	4.34148	1.53726	-1.11293	0.757443	0.757443
CDKN2AIP	ENST00000506835.1	0.00293847	0.0472965	3.21868	1.08224	2.37183	3.14118	1.22875	-0.0459765	0.528103	0.528103
SLC16A1	ENST00000626371.1	0.00293887	0.0472965	0.753491	0.253354	4.36651	0.183082	0.0393417	0.056941	0.0532398	0.056941
SLC16A1	ENST00000429288.1	0.00293887	0.0472965	0.753491	0.253354	4.36651	0.183082	0.0393417	0.056941	0.0532398	0.056941
RNF135	ENST00000443677.6	0.00294528	0.0473765	2.63484	0.88614	1.90597	2.62724	0.386466	0.341957	0.7914	0.7914
UBOX5	ENST00000217173.7	0.00295045	0.0474482	0.746356	0.251057	4.83631	0.183774	0.047903	0.0466415	0.0343112	0.0466415
KMT5A	ENST00000330479.8	0.00297163	0.0476844	3.08685	1.03911	1.58106	3.32707	0.597979	-0.146163	1.02166	1.02166
NHSL1	ENST00000343505.9	0.00298093	0.0477873	0.733487	0.246991	6.75148	0.229349	0.00322673	0.0882798	0.0125497	0.0882798
NDUFAF7	ENST00000455230.5	0.0029841	0.0478152	1.61264	0.54309	3.898	0.708044	0.349439	-0.287377	0.0929817	0.0929817
NUAK2	ENST00000367157.4	0.0029901	0.0478995	0.761796	0.256605	6.66155	0.186198	0.00146059	0.0973084	0.0129504	0.0973084
PDLIM2	ENST00000397760.8	0.0029947	0.0479617	1.11868	0.376878	4.46522	0.404728	0.149315	0.0637413	0.0478632	0.0637413
SHMT2	ENST00000553474.5	0.00300344	0.0480899	1.54217	0.519707	6.61013	0.612176	0.391957	-0.265035	0.0131864	0.0131864
YWHAB	ENST00000479421.5	0.00300513	0.0481053	1.56445	0.527246	5.34797	0.526426	0.392301	-0.307022	0.0246825	0.0246825
SOCS2	ENST00000536696.6	0.00300902	0.0481327	0.881774	0.297212	4.52211	0.274887	0.0418086	0.0906941	0.0451522	0.0906941
UCHL1	ENST00000284440.8	0.00302033	0.0482319	2.02753	0.683668	6.3298	1.45451	0.686492	-0.251494	0.0146104	0.0146104
PUS10	ENST00000398658.2	0.00302438	0.0482733	0.994499	0.335385	3.58876	0.213693	0.0334207	-0.00584355	0.135304	0.135304
AGTRAP	ENST00000400895.6	0.00304455	0.0485134	1.43382	0.483874	4.14523	0.59996	0.2824	-0.0116951	0.0688016	0.0688016
L2HGDH	ENST00000555423.5	0.003057	0.0486765	3.78088	1.27648	2.01691	3.08648	1.72259	-1.41188	0.721531	0.721531
MLF1	ENST00000495452.5	0.00306409	0.0487659	3.63375	1.22711	2.52794	4.48794	1.80315	0.0261875	0.45554	0.45554
PHPT1	ENST00000492540.5	0.00306544	0.0487757	0.641659	0.216696	4.47422	0.12813	0.0230197	0.0399064	0.0474161	0.0474161
ADCY5	ENST00000491190.5	0.00306694	0.0487878	1.19534	0.403701	5.08478	0.392318	0.215545	-0.0672512	0.0289168	0.0289168
KLF15	ENST00000296233.4	0.0030987	0.0491196	0.900885	0.304582	6.46669	0.260646	0.00162852	0.137527	0.0138794	0.137527
AC240274.1	ENST00000614336.4	0.00309815	0.0491196	0.908145	0.307031	5.58456	0.2732	0.0160287	0.125373	0.0213846	0.125373
LMNB2	ENST00000532465.1	0.00311341	0.0492579	0.614433	0.207838	4.56179	0.0977686	0.0213755	0.00787167	0.0434192	0.0434192
SNRK	ENST00000437827.1	0.00311315	0.0492579	3.48057	1.17732	1.64453	4.1719	1.10536	0.357972	0.973783	0.973783
ADAM15	ENST00000527418.5	0.00312064	0.0493481	2.55838	0.865606	1.85334	2.202	0.297762	0.630277	0.82615	0.82615
SLC1A5	ENST00000594991.5	0.0031208	0.0493481	0.756073	0.255812	5.9168	0.265207	0.0238829	0.0742766	0.0175639	0.0742766
THBS4	ENST00000350881.6	0.00313376	0.0495174	0.757762	0.256494	6.40914	0.277213	0.0518248	0.0468592	0.0141767	0.0468592
NCOR2	ENST00000429285.6	0.0031378	0.0495695	2.29817	0.778012	6.56778	1.97814	0.674089	0.233866	0.013385	0.233866
MAPKAPK5	ENST00000546394.1	0.00315334	0.0497318	0.754562	0.255578	4.23551	0.135729	0.0361563	0.00119708	0.0618236	0.0618236
TSGA10IP	ENST00000532620.5	0.00315586	0.0497597	1.0719	0.363094	3.94311	0.401352	0.0829448	0.114811	0.0879741	0.114811
ABCG4	ENST00000619701.5	0.0031638	0.0498612	0.592034	0.200597	4.61982	0.085898	0.0192535	0.00765083	0.0411053	0.0411053

## Sheet: iPSC, WT v RNF20 Het2, WT up
ext_gene	target_id	pval	qval	b	se_b	mean_obs	var_obs	tech_var	sigma_sq	smooth_sigma_sq	final_sigma_sq
AL512646.1	ENST00000269395.6	1.83813e-70	1.2161e-65	-4.26833	0.240518	5.27256	4.50458	0.0213229	0.0654506	0.0258022	0.0654506
IQCA1	ENST00000409907.8	2.07148e-57	6.85246e-53	-6.06967	0.38007	3.27877	8.90313	0.0185638	0.00770505	0.198116	0.198116
NA	ENST00000648322.1	2.1412e-47	3.54154e-43	-5.68658	0.39324	3.44029	7.79959	0.0703043	0.147908	0.161652	0.161652
FOS	ENST00000303562.9	7.90792e-44	8.7198e-40	-2.38283	0.171623	5.11183	1.19617	0.0157511	0.0134273	0.0284304	0.0284304
NFE2L3	ENST00000606261.1	1.38334e-23	5.38365e-20	-0.991835	0.0990885	7.17299	0.218092	0.00356163	0.0111662	0.0110757	0.0111662
LAPTM5	ENST00000294507.4	1.17261e-19	3.10318e-16	-6.14303	0.67717	2.18506	7.21264	0.0632413	0.00729164	0.624598	0.624598
CD44	ENST00000263398.10	2.00562e-18	5.10353e-15	-1.65802	0.189337	4.76371	0.561841	0.017459	0.0329549	0.0363139	0.0363139
MSH6	ENST00000538136.1	5.38368e-18	1.22822e-14	-0.991713	0.114716	8.19716	0.259866	0.00428669	0.015453	0.00982927	0.015453
AC139769.1	ENST00000472297.2	7.33637e-18	1.56572e-14	-1.19967	0.139342	5.46874	0.296896	0.00512596	0.0239985	0.0229755	0.0239985
B2M	ENST00000561424.5	4.66673e-17	8.34463e-14	-1.89019	0.225162	6.23875	1.17663	0.00378118	0.0722659	0.0151493	0.0722659
B2M	ENST00000631728.1	4.66673e-17	8.34463e-14	-1.89019	0.225162	6.23875	1.17663	0.00378118	0.0722659	0.0151493	0.0722659
IAH1	ENST00000482918.5	6.17808e-17	1.04075e-13	-5.04971	0.603903	2.64924	6.33992	0.142434	-0.0691845	0.404615	0.404615
SET	ENST00000372686.5	9.9064e-17	1.57525e-13	-1.04026	0.125243	8.30812	0.257572	0.00425354	0.0192753	0.00986677	0.0192753
MEMO1	ENST00000404530.5	6.02497e-16	8.13493e-13	-0.985354	0.121817	6.20285	0.225066	0.00688316	0.0110184	0.0153759	0.0153759
RPL21	ENST00000493317.1	3.37342e-15	3.84803e-12	-1.56841	0.199132	6.95747	0.874594	0.0477337	-0.000381735	0.0117465	0.0117465
MGMT	ENST00000306010.8	4.60046e-15	4.98961e-12	-4.60749	0.587886	2.41779	5.45832	0.0124759	0.00336863	0.50594	0.50594
B2M	ENST00000544417.5	5.34306e-15	5.70156e-12	-1.30771	0.167257	6.20656	0.488532	0.0266104	0.00594567	0.0153521	0.0153521
C6orf62	ENST00000378119.9	3.25178e-14	3.16379e-11	-0.653307	0.0860988	7.464	0.100504	0.000704915	0.00619007	0.0104146	0.0104146
CAT	ENST00000241052.5	3.52953e-14	3.38426e-11	-4.5335	0.598304	2.40561	4.81775	0.0252028	0.0277108	0.511749	0.511749
MNS1	ENST00000260453.4	6.67378e-14	5.58908e-11	-1.22102	0.16293	4.93228	0.307631	0.0078226	0.0152908	0.0319965	0.0319965
IL6R	ENST00000368485.8	8.3571e-14	6.91132e-11	-0.913727	0.122408	5.76448	0.227465	0.00337251	0.0110436	0.0191032	0.0191032
NCL	ENST00000494618.1	1.13143e-13	9.01869e-11	-1.05842	0.142557	7.79177	0.31997	0.00191207	0.0285716	0.00997138	0.0285716
MATR3	ENST00000502422.5	1.44016e-13	1.12095e-10	-1.1038	0.149312	6.73489	0.255996	0.0208193	0.00174403	0.0126219	0.0126219
LMNB1	ENST00000504788.5	1.45999e-13	1.12318e-10	-0.796825	0.107814	7.78873	0.145231	0.00201393	0.0154218	0.00997411	0.0154218
ARHGDIB	ENST00000228945.9	1.89505e-13	1.40872e-10	-5.47983	0.744947	3.07646	6.46547	0.577249	0.0415068	0.25517	0.25517
PABPC1	ENST00000519596.5	2.30082e-13	1.65459e-10	-0.667152	0.0910161	8.02381	0.169728	0.0025895	0.00665803	0.00983639	0.00983639
PDK1	ENST00000410055.5	3.4197e-13	2.33245e-10	-0.924127	0.126997	5.97	0.199461	0.00627795	0.0179145	0.017096	0.0179145
MAGEA6	ENST00000329342.9	9.1684e-13	5.6165e-10	-3.07111	0.42998	3.99068	2.00418	0.0470771	0.230247	0.0829908	0.230247
ETF1	ENST00000503014.5	1.5844e-12	8.88618e-10	-0.852576	0.120644	7.34702	0.155834	0.00295268	0.0188797	0.0106485	0.0188797
ITGAL	ENST00000356798.10	1.87692e-12	1.02626e-09	-4.89851	0.695482	2.24924	5.10687	0.135221	-0.0544508	0.590321	0.590321
DCUN1D5	ENST00000527260.5	2.35417e-12	1.24592e-09	-1.66025	0.236782	4.81278	0.52624	0.0491647	-0.0388924	0.0349342	0.0349342
HM13	ENST00000498035.5	2.37282e-12	1.24592e-09	-1.4963	0.213434	4.41528	0.572003	0.0178585	0.021851	0.0504727	0.0504727
VASH2	ENST00000366968.8	4.96079e-12	2.43115e-09	-0.619258	0.0896606	7.72912	0.124652	0.00202573	0.006051	0.0100328	0.0100328
HSPH1	ENST00000630972.2	5.63517e-12	2.67401e-09	-1.0606	0.153965	7.09629	0.277862	0.00649989	0.029058	0.0112957	0.029058
DEK	ENST00000651992.1	8.05903e-12	3.57843e-09	-1.18818	0.173774	7.25408	0.395705	0.0344318	-0.0220471	0.0108645	0.0108645
SINHCAFP3	ENST00000524174.1	2.26315e-11	9.07455e-09	-0.953084	0.142508	5.65076	0.20092	0.00997757	0.00699082	0.0204851	0.0204851
LPAR4	ENST00000607964.1	3.29632e-11	1.27535e-08	-1.24401	0.187557	5.67403	0.375029	0.0152079	0.0375585	0.0201838	0.0375585
HELLS	ENST00000348459.10	3.77123e-11	1.41764e-08	-0.770532	0.116521	8.07097	0.131929	0.000995874	0.01937	0.00982655	0.01937
PSMD12	ENST00000584008.5	3.84197e-11	1.42511e-08	-0.734697	0.111149	6.76071	0.127499	0.00362806	0.0149029	0.01251	0.0149029
AFAP1L1	ENST00000513665.1	4.84083e-11	1.72188e-08	-1.12722	0.17142	5.07771	0.386084	0.0150308	0.012559	0.0290466	0.0290466
H3-3B	ENST00000593254.1	5.34067e-11	1.88951e-08	-0.589881	0.0899055	7.52036	0.0997872	0.00180798	0.00500072	0.0103165	0.0103165
HSPA4	ENST00000514825.1	8.51724e-11	2.84596e-08	-0.921246	0.141923	6.72885	0.186497	0.00404684	0.0261664	0.0126484	0.0261664
SRSF3	ENST00000614136.1	8.92603e-11	2.92349e-08	-1.66818	0.257272	5.08667	0.634271	0.0704009	0.0211458	0.0288823	0.0288823
MSH6	ENST00000652107.1	9.44814e-11	3.07926e-08	-4.91317	0.758729	2.57132	6.03861	0.426728	-0.368059	0.436775	0.436775
YME1L1	ENST00000375972.7	1.10978e-10	3.54701e-08	-0.62955	0.0975866	7.36503	0.0809991	0.00367497	0.00276503	0.0106098	0.0106098
B4GALT6	ENST00000578114.1	1.17295e-10	3.71305e-08	-0.937525	0.145515	5.3467	0.186575	0.0070611	0.0155272	0.024701	0.024701
DBF4	ENST00000431138.5	1.26654e-10	3.95347e-08	-0.72354	0.112506	6.56302	0.113946	0.00557871	-0.00428792	0.0134076	0.0134076
CCDC141	ENST00000443758.6	1.58429e-10	4.83027e-08	-1.23318	0.192773	5.83104	0.410341	0.00608399	0.0496583	0.0183911	0.0496583
ARHGAP29	ENST00000260526.11	1.63834e-10	4.92694e-08	-0.914202	0.143025	5.42525	0.169831	0.00710292	0.000499407	0.0235813	0.0235813
CAPRIN1	ENST00000533657.5	2.01827e-10	5.93461e-08	-0.673742	0.105935	7.42565	0.126934	0.00248277	0.0143506	0.0104867	0.0143506
HM13	ENST00000649583.1	2.17848e-10	6.29381e-08	-4.11483	0.648189	3.79444	5.28476	0.352496	0.277726	0.105565	0.277726
GRPEL1	ENST00000509696.5	2.99737e-10	8.43857e-08	-0.747779	0.118716	5.94207	0.114026	0.00380249	0.00823904	0.0173376	0.0173376
WWC3	ENST00000380861.8	2.9951e-10	8.43857e-08	-1.53294	0.243362	4.246	0.592932	0.0172958	0.0715416	0.0610714	0.0715416
ZNF525	ENST00000467003.1	3.288e-10	9.10185e-08	-0.770203	0.122555	7.07109	0.13515	0.00504162	0.017488	0.0113724	0.017488
PABPC4L	ENST00000421491.4	3.5511e-10	9.66834e-08	-0.786451	0.125379	5.72204	0.165094	0.00341688	0.020163	0.019593	0.020163
NOL7	ENST00000474485.1	4.75609e-10	1.27394e-07	-0.993898	0.159612	6.31298	0.225533	0.00552072	0.0326935	0.0147064	0.0326935
TTC39C	ENST00000577185.1	5.36731e-10	1.42041e-07	-1.43179	0.230637	4.93613	0.482479	0.0284232	0.0513669	0.0319105	0.0513669
UBA2	ENST00000439527.6	8.46974e-10	2.15522e-07	-0.702928	0.114561	7.37979	0.120265	0.00422537	0.0154608	0.0105788	0.0154608
C1QBP	ENST00000574444.5	1.27521e-09	3.14805e-07	-0.675456	0.111269	8.13971	0.122742	0.00154349	0.0170276	0.00982278	0.0170276
RPS3	ENST00000526248.5	1.37222e-09	3.33772e-07	-7.02919	1.16018	3.24744	9.87135	1.81288	-1.54275	0.206151	0.206151
HIF1A	ENST00000557538.5	1.3965e-09	3.38433e-07	-6.69899	1.1062	3.97336	9.79241	1.71568	0.119829	0.0847699	0.119829
ZNF430	ENST00000261560.10	1.59884e-09	3.81875e-07	-0.647335	0.10728	6.25711	0.134259	0.00222687	0.00687025	0.0150366	0.0150366
NUB1	ENST00000483358.5	1.83e-09	4.24818e-07	-1.20184	0.1999	5.07089	0.291792	0.0307671	-0.00607154	0.0291728	0.0291728
FGF13	ENST00000305414.8	1.9495e-09	4.47844e-07	-0.713436	0.118867	6.01917	0.119677	0.0045029	0.0128052	0.0166912	0.0166912
S100A4	ENST00000368716.9	2.37675e-09	5.33038e-07	-1.48089	0.248067	5.33551	0.49782	0.00653984	0.0857663	0.0248639	0.0857663
DAZAP1	ENST00000592453.2	2.78731e-09	6.1559e-07	-0.911983	0.153438	6.52049	0.226884	0.0217025	-0.00549532	0.0136124	0.0136124
SSR1	ENST00000397511.6	2.79137e-09	6.1559e-07	-0.69089	0.116244	6.91744	0.120603	0.00233315	0.017936	0.0118896	0.017936
PABPC4	ENST00000470443.5	3.01822e-09	6.55286e-07	-1.13648	0.19163	5.54701	0.352102	0.0331845	0.0112446	0.0218986	0.0218986
KIF20B	ENST00000260753.8	4.37202e-09	9.12663e-07	-0.790525	0.134684	7.5968	0.155649	0.00405016	0.0231596	0.0101983	0.0231596
SEPHS1	ENST00000378614.8	5.18399e-09	1.05206e-06	-1.1835	0.202614	5.52449	0.370558	0.0393715	0.016766	0.0222074	0.0222074
RSL24D1	ENST00000562993.5	5.64728e-09	1.1391e-06	-5.49995	0.943893	2.57746	6.36591	0.902233	-0.789881	0.434167	0.434167
PDK1	ENST00000282077.7	6.03167e-09	1.20926e-06	-0.786646	0.135258	6.30963	0.143241	0.00229107	0.0251511	0.0147257	0.0251511
TENT5C	ENST00000369448.4	6.90805e-09	1.36023e-06	-1.7644	0.304567	3.79312	0.77579	0.0334054	0.0956209	0.105736	0.105736
TNFAIP8	ENST00000415806.2	7.46351e-09	1.44382e-06	-1.02457	0.177256	4.94857	0.243914	0.0154938	0.029965	0.0316358	0.0316358
SESN1	ENST00000356644.7	8.0714e-09	1.52138e-06	-1.11884	0.194009	5.86436	0.294246	0.0102605	0.0461987	0.0180583	0.0461987
CD3G	ENST00000532917.2	8.13144e-09	1.52834e-06	-3.52475	0.61133	3.03889	2.88974	0.293589	-0.207028	0.266997	0.266997
CCL5	ENST00000605140.6	9.04774e-09	1.66741e-06	-3.18169	0.55356	3.27069	2.62856	0.259485	-0.0785786	0.200159	0.200159
TTC39C	ENST00000317571.8	9.47374e-09	1.73624e-06	-0.950442	0.165585	6.73634	0.202879	0.00339172	0.0377361	0.0126155	0.0377361
PYGL	ENST00000530336.2	1.19934e-08	2.13225e-06	-0.747615	0.131165	5.65285	0.126531	0.00534871	0.0174911	0.0204575	0.0204575
CHODL	ENST00000400128.5	1.20983e-08	2.13225e-06	-1.38778	0.243541	5.01234	0.460088	0.0145212	0.0744468	0.0303017	0.0744468
FAAH2	ENST00000374900.4	1.67438e-08	2.78334e-06	-0.688144	0.121954	5.78695	0.151673	0.00345367	0.0141395	0.0188554	0.0188554
ITGA4	ENST00000397033.7	1.67911e-08	2.78421e-06	-1.0915	0.193453	4.66017	0.27962	0.0165003	0.0042252	0.0396357	0.0396357
RGS2	ENST00000235382.7	1.76776e-08	2.90932e-06	-0.722122	0.128188	5.95487	0.140821	0.00262841	0.0220197	0.0172258	0.0220197
ST13	ENST00000620312.4	1.77291e-08	2.91056e-06	-0.614398	0.109075	6.81517	0.141683	0.00556267	0.0056766	0.0122833	0.0122833
DNAJC15	ENST00000379221.4	1.93239e-08	3.1335e-06	-0.630854	0.112293	6.07155	0.0914594	0.002628	0.0015457	0.0162865	0.0162865
NODAL	ENST00000287139.7	2.15247e-08	3.41504e-06	-1.71641	0.306541	6.08378	1.07774	0.00591409	0.135037	0.0161956	0.135037
HCLS1	ENST00000314583.8	2.89509e-08	4.47521e-06	-2.80189	0.505058	3.81138	1.81815	0.279224	0.097457	0.103401	0.103401
RPL22L1	ENST00000463836.1	3.01722e-08	4.62082e-06	-1.82052	0.328587	6.49285	0.795192	0.00555246	0.156402	0.0137483	0.156402
NACA	ENST00000549259.5	3.19251e-08	4.84442e-06	-0.887671	0.160504	7.32453	0.197623	0.0132622	0.0253799	0.0106982	0.0253799
DIS3	ENST00000490646.1	3.21561e-08	4.8683e-06	-0.654672	0.118401	6.57543	0.102165	0.00767942	0.0132138	0.0133488	0.0133488
SHLD2	ENST00000298786.4	3.37447e-08	5.05101e-06	-0.666096	0.120652	6.75907	0.107751	0.00350421	0.0183311	0.0125171	0.0183311
EIF5B	ENST00000289371.11	3.58707e-08	5.33304e-06	-0.684426	0.124214	7.35661	0.110811	0.00318334	0.0199603	0.0106277	0.0199603
RSL1D1	ENST00000355674.9	3.83837e-08	5.65583e-06	-0.89451	0.162694	7.19986	0.180198	0.00450616	0.0351976	0.0110033	0.0351976
WIPF1	ENST00000392547.6	4.64578e-08	6.5958e-06	-1.05489	0.19305	4.88024	0.248086	0.0226935	0.0206283	0.0332088	0.0332088
KLRK1	ENST00000240618.11	4.94723e-08	6.93625e-06	-2.55551	0.468626	3.25476	1.98544	0.125168	-0.0163063	0.204247	0.204247
CALB1	ENST00000265431.7	4.94847e-08	6.93625e-06	-1.12411	0.20614	6.35157	0.318547	0.00407562	0.0596648	0.0144884	0.0596648
PRPS2	ENST00000380668.9	5.83774e-08	8.02963e-06	-0.655597	0.120876	6.50077	0.099842	0.00259196	0.0193247	0.0137091	0.0193247
ASCC3	ENST00000369162.7	7.25472e-08	9.69642e-06	-0.598518	0.111151	8.4508	0.0840767	0.000243796	0.0182879	0.00996389	0.0182879
HNRNPU	ENST00000440865.2	7.27195e-08	9.69985e-06	-0.853298	0.158478	7.43735	0.183377	0.0100019	0.0276712	0.0104642	0.0276712
ACSL3	ENST00000407441.4	7.52037e-08	9.99092e-06	-1.14469	0.212836	4.93492	0.340537	0.0360114	-0.0120838	0.0319374	0.0319374
RPS6P12	ENST00000432491.1	7.70907e-08	1.02006e-05	-1.13662	0.211511	4.51382	0.532123	0.013341	0.0537642	0.0455303	0.0537642
MCM4	ENST00000649973.1	8.44942e-08	1.10042e-05	-0.714998	0.133463	8.64809	0.121682	0.00682204	0.0198967	0.0101915	0.0198967
TRAC	ENST00000611116.2	9.49037e-08	1.21213e-05	-4.59498	0.861092	3.66867	4.79963	0.026196	1.08602	0.122977	1.08602
PARM1	ENST00000307428.7	1.0144e-07	1.28323e-05	-0.664464	0.124803	6.18907	0.123047	0.00240595	0.0209576	0.0154652	0.0209576
RPF2	ENST00000368864.8	1.05179e-07	1.32546e-05	-0.802612	0.150937	5.53203	0.136782	0.0120689	0.00913928	0.022104	0.022104
PCED1B	ENST00000546455.6	1.10716e-07	1.37687e-05	-5.33679	1.00539	1.8692	6.50272	0.234229	1.28198	0.815569	1.28198
SEMA6A	ENST00000343348.10	1.13138e-07	1.39911e-05	-0.711821	0.134198	9.29546	0.167421	0.000251761	0.026762	0.0117906	0.026762
RPL17	ENST00000615479.4	1.28514e-07	1.55723e-05	-0.603841	0.114343	6.75615	0.0931669	0.00708193	-0.00172545	0.0125296	0.0125296
IFT81	ENST00000552912.5	1.291e-07	1.55862e-05	-0.891772	0.168892	5.59242	0.183219	0.02151	0.0156094	0.021277	0.021277
BTBD11	ENST00000357167.8	1.43085e-07	1.70261e-05	-0.775505	0.1474	5.66514	0.139244	0.0122923	0.0153461	0.0202977	0.0202977
TOPORS	ENST00000379858.1	1.4464e-07	1.71803e-05	-0.650619	0.123709	6.80022	0.130831	0.00718921	0.0157668	0.0123443	0.0157668
PPP2R5C	ENST00000556260.6	1.48177e-07	1.75374e-05	-0.768165	0.146183	5.21878	0.118463	0.0054156	0.00103704	0.0266387	0.0266387
PAG1	ENST00000220597.4	1.49564e-07	1.76699e-05	-1.69976	0.323572	3.64641	0.665796	0.0307377	0.0982131	0.126311	0.126311
WDR12	ENST00000478869.1	1.49858e-07	1.76731e-05	-0.715022	0.136124	5.63811	0.123019	0.0049944	0.0228001	0.0206531	0.0228001
NA	ENST00000540828.6	1.86839e-07	2.13494e-05	-0.592638	0.113707	6.83705	0.13161	0.00449648	0.0148975	0.0121956	0.0148975
RINT1	ENST00000257700.7	1.93091e-07	2.19124e-05	-0.664891	0.12772	6.4956	0.10125	0.00355529	0.0209132	0.0137346	0.0209132
TAF5	ENST00000369839.4	1.96075e-07	2.22129e-05	-0.586423	0.112708	6.44602	0.0925258	0.0015992	0.0174555	0.0139847	0.0174555
AC093752.1	ENST00000510011.5	2.07275e-07	2.33617e-05	-1.13666	0.218896	4.6463	0.392108	0.0193243	0.0525487	0.0401287	0.0525487
UHMK1	ENST00000545294.5	2.28378e-07	2.54368e-05	-7.10426	1.37291	2.76487	11.6252	1.37256	1.45474	0.360592	1.45474
FCHO2	ENST00000430046.7	2.39957e-07	2.64593e-05	-0.718849	0.139167	5.60369	0.108655	0.00792845	0.00608577	0.0211227	0.0211227
ZNF808	ENST00000487863.5	2.53545e-07	2.76351e-05	-0.820343	0.159133	4.95844	0.147267	0.00656379	0.0169882	0.0314214	0.0314214
NA	ENST00000652567.1	2.53545e-07	2.76351e-05	-0.820343	0.159133	4.95844	0.147267	0.00656379	0.0169882	0.0314214	0.0314214
TMOD3	ENST00000560549.5	2.6855e-07	2.90789e-05	-4.57228	0.888808	2.93461	5.2564	0.883558	-0.0632191	0.301411	0.301411
IFIT1	ENST00000371804.4	2.70704e-07	2.92644e-05	-0.909333	0.176818	4.83237	0.189711	0.0124829	0.0260645	0.0344137	0.0344137
BTG2	ENST00000290551.5	2.88274e-07	3.08183e-05	-1.02778	0.20031	5.09093	0.265527	0.00704323	0.0531427	0.0288049	0.0531427
ALDH1A3	ENST00000329841.10	3.14442e-07	3.29691e-05	-0.607102	0.1187	6.12977	0.138509	0.00526894	0.00423091	0.0158657	0.0158657
CD5	ENST00000347785.8	3.47012e-07	3.58724e-05	-4.17633	0.819541	1.88341	3.52773	0.201301	0.0322561	0.806169	0.806169
RAC2	ENST00000249071.11	3.55178e-07	3.66021e-05	-1.81004	0.355499	4.13751	0.760874	0.0442693	0.145301	0.0694413	0.145301
NEK3	ENST00000610828.5	3.59327e-07	3.69628e-05	-0.660725	0.129826	6.67069	0.142877	0.00226568	0.0230163	0.012909	0.0230163
EDNRB	ENST00000475537.2	3.60451e-07	3.69628e-05	-5.08442	0.99915	2.52698	6.07225	1.04149	-0.0180755	0.455966	0.455966
EIF1AXP1	ENST00000419267.1	3.60353e-07	3.69628e-05	-0.72421	0.142315	5.6123	0.171332	0.00937547	0.0202883	0.0210047	0.0210047
HNRNPD	ENST00000514671.5	4.18694e-07	4.18754e-05	-1.44218	0.285001	5.25576	0.468906	0.095779	-0.013942	0.0260596	0.0260596
PAICS	ENST00000514888.5	4.20745e-07	4.19857e-05	-0.747175	0.147683	8.29944	0.18276	0.0196743	0.013041	0.00986264	0.013041
TIE1	ENST00000372476.8	4.24992e-07	4.23456e-05	-1.34347	0.265644	4.08935	0.531968	0.0286921	0.0771578	0.0735921	0.0771578
SH3D19	ENST00000409252.6	4.31939e-07	4.28442e-05	-1.3124	0.25966	6.07009	0.413478	0.0331298	0.0680054	0.0162974	0.0680054
TRIM43	ENST00000272395.2	4.40399e-07	4.34878e-05	-2.47423	0.489886	3.67607	1.80167	0.182746	0.177237	0.121886	0.177237
ABCG2	ENST00000237612.8	4.60207e-07	4.50908e-05	-0.950957	0.1886	4.6988	0.299902	0.0150295	0.0324547	0.0383253	0.0383253
AHCTF1	ENST00000326225.3	4.68179e-07	4.56855e-05	-7.173	1.42352	3.17151	12.5496	1.63899	1.40062	0.226879	1.40062
B2M	ENST00000349264.10	5.13564e-07	4.94576e-05	-1.28855	0.256623	6.5141	0.686079	0.00871103	0.0900722	0.0136435	0.0900722
PES1	ENST00000433575.5	5.56808e-07	5.31579e-05	-4.39594	0.878201	2.42202	4.54002	0.65131	0.505544	0.503931	0.505544
NUP155	ENST00000381843.6	5.61927e-07	5.35693e-05	-0.798023	0.159481	7.3277	0.14882	0.005031	0.0331205	0.0106911	0.0331205
ZNF737	ENST00000427401.9	6.58877e-07	6.06276e-05	-0.60262	0.121176	5.84746	0.0905851	0.00380013	0.0179276	0.0182252	0.0182252
SLC25A24	ENST00000639032.1	7.4601e-07	6.79366e-05	-0.772379	0.156068	5.6446	0.150088	0.0159693	0.00709981	0.0205665	0.0205665
SLC25A24	ENST00000370041.4	7.4601e-07	6.79366e-05	-0.772379	0.156068	5.6446	0.150088	0.0159693	0.00709981	0.0205665	0.0205665
ZNF560	ENST00000301480.4	7.92286e-07	7.14137e-05	-2.92722	0.592883	3.56582	2.27644	0.0741579	0.453107	0.139027	0.453107
TIMP3	ENST00000266085.6	8.27328e-07	7.42687e-05	-0.848823	0.172217	4.75377	0.171249	0.00788033	0.0301419	0.0366075	0.0366075
ACSL4	ENST00000348502.10	8.79827e-07	7.84492e-05	-0.653127	0.132837	7.35539	0.115663	0.00754886	0.0189195	0.0106304	0.0189195
SNX5	ENST00000490175.5	9.43569e-07	8.32354e-05	-0.889709	0.18146	6.6917	0.186454	0.0288967	0.020495	0.0128142	0.020495
SNX3	ENST00000426155.6	9.42439e-07	8.32354e-05	-5.75688	1.17408	1.97896	7.31201	1.3228	0.0116995	0.744907	0.744907
TMEM132B	ENST00000299308.7	9.58503e-07	8.43279e-05	-0.735098	0.150021	5.25786	0.249545	0.00773219	0.0135321	0.0260272	0.0260272
H4C3	ENST00000377803.3	9.76838e-07	8.52497e-05	-1.57322	0.321311	3.80627	0.613187	0.0274105	0.127451	0.104049	0.127451
CD52	ENST00000374213.3	9.86175e-07	8.57112e-05	-4.41383	0.901816	3.42042	4.62457	0.0410645	1.17884	0.165687	1.17884
NET1	ENST00000380359.3	1.02911e-06	8.90016e-05	-0.811863	0.166161	8.08773	0.165561	0.000638013	0.0407764	0.00982447	0.0407764
ARHGAP26	ENST00000646213.1	1.03465e-06	8.93636e-05	-0.925583	0.189477	4.61228	0.268412	0.0124604	0.0212412	0.041392	0.041392
CR1L	ENST00000531844.5	1.04738e-06	9.0305e-05	-1.23741	0.253437	4.41425	0.406419	0.0165774	0.0797682	0.0505289	0.0797682
GPS1	ENST00000580141.5	1.05669e-06	9.0911e-05	-4.52205	0.926503	2.45193	5.29722	0.79771	-0.783251	0.489902	0.489902
RPAP3	ENST00000380650.4	1.11347e-06	9.48099e-05	-0.797462	0.163735	6.0635	0.149889	0.0108545	0.0293591	0.016347	0.0293591
GMFG	ENST00000597595.6	1.13221e-06	9.61582e-05	-4.58467	0.941962	1.89773	4.23389	0.534165	-0.189918	0.796773	0.796773
NTS	ENST00000256010.7	1.19149e-06	0.000100291	-1.77298	0.365032	6.08445	0.748015	0.00325926	0.196613	0.0161907	0.196613
SPINK9	ENST00000511717.6	1.24401e-06	0.000103849	-0.694839	0.14331	5.27155	0.165683	0.00498923	0.0219579	0.0258175	0.0258175
TRIM4	ENST00000349062.6	1.31495e-06	0.000108186	-0.601817	0.124407	5.99903	0.148015	0.00636176	0.0135957	0.016854	0.016854
EMC2	ENST00000517784.5	1.40232e-06	0.000113559	-0.706307	0.146395	5.29096	0.120843	0.00662327	0.00913223	0.0255239	0.0255239
RPL36	ENST00000579649.5	1.49988e-06	0.000120574	-1.48688	0.309042	6.29604	0.613165	0.0520011	0.0912597	0.0148046	0.0912597
TAF13	ENST00000461096.6	1.68276e-06	0.000133049	-0.711474	0.148589	5.30758	0.105418	0.00784238	0.00607578	0.0252755	0.0252755
PABPC4	ENST00000421687.6	1.71111e-06	0.00013445	-0.958552	0.20033	6.26671	0.263393	0.0388081	0.0213903	0.0149785	0.0213903
HSP90AA1	ENST00000554401.1	1.72888e-06	0.000135524	-1.50794	0.315285	4.67776	0.799209	0.110079	-0.0439343	0.039028	0.039028
SSB	ENST00000260956.9	1.77967e-06	0.000138034	-0.619646	0.129716	8.80412	0.107081	0.00018021	0.025059	0.0104517	0.025059
HNRNPA1	ENST00000547276.5	1.78538e-06	0.000138237	-0.76239	0.159619	6.92515	0.207604	0.0116258	0.0265916	0.0118615	0.0265916
EIF2S1	ENST00000554332.1	1.78647e-06	0.000138237	-0.587173	0.122938	5.87566	0.0751448	0.00472168	0.0075524	0.0179488	0.0179488
KIF23	ENST00000647715.1	1.86716e-06	0.000143474	-0.626666	0.131451	7.60663	0.0933123	0.00310622	0.0228128	0.0101843	0.0228128
CACYBP	ENST00000405362.1	1.89012e-06	0.000144902	-0.989203	0.207605	6.34976	0.254115	0.00678861	0.0578612	0.0144985	0.0578612
GNB4	ENST00000232564.8	1.90669e-06	0.000146003	-0.595213	0.124964	7.18786	0.0858923	0.00111213	0.0223119	0.0110353	0.0223119
CNOT8	ENST00000285896.10	1.99839e-06	0.000151522	-1.01846	0.21425	6.79697	0.225324	0.0564968	-0.0166547	0.0123577	0.0123577
TC2N	ENST00000435962.7	2.04135e-06	0.000153998	-5.65273	1.19023	1.95197	7.07665	1.36309	-0.0144374	0.761865	0.761865
PAWR	ENST00000547699.1	2.05385e-06	0.000154588	-1.01637	0.214061	4.73128	0.374886	0.0314425	-0.0155133	0.0372906	0.0372906
NUB1	ENST00000468404.5	2.11595e-06	0.00015872	-0.640069	0.134978	5.74803	0.0977349	0.0080391	0.0190623	0.0192895	0.0192895
CER1	ENST00000380911.3	2.129e-06	0.000159518	-2.17789	0.459395	4.62854	1.36353	0.0200699	0.296495	0.0407784	0.296495
SAMD12	ENST00000445741.6	2.29442e-06	0.000169041	-0.595538	0.126024	5.7848	0.130389	0.00494425	0.00175152	0.0188788	0.0188788
SH2D4A	ENST00000265807.8	2.34002e-06	0.000171636	-0.638165	0.135159	5.58573	0.156272	0.00603326	0.0188192	0.0213686	0.0213686
CNDP2	ENST00000324301.12	2.35672e-06	0.000172479	-5.72934	1.21381	2.96957	7.74238	1.92034	-1.71412	0.289646	0.289646
SPR	ENST00000234454.6	2.38292e-06	0.000173759	-0.679151	0.143952	5.30793	0.210076	0.00581291	0.0170484	0.0252703	0.0252703
AHCTF1	ENST00000483900.1	2.42423e-06	0.00017567	-0.66793	0.141679	6.02214	0.10887	0.0134417	0.00657431	0.0166676	0.0166676
CYTIP	ENST00000264192.8	2.61297e-06	0.000187296	-2.16268	0.460233	3.21232	1.29366	0.102199	0.171622	0.215522	0.215522
HAUS3	ENST00000443786.2	2.63332e-06	0.000188143	-0.640531	0.136355	5.60873	0.103137	0.00683547	0.0119721	0.0210535	0.0210535
IAH1	ENST00000496603.5	2.97495e-06	0.000209164	-3.76343	0.805436	1.81521	3.59024	0.121129	-0.0530471	0.851962	0.851962
NUF2	ENST00000367900.7	3.08808e-06	0.000215287	-0.863748	0.18516	5.64993	0.176678	0.0309304	0.0089333	0.020496	0.020496
RPAP3	ENST00000432584.7	3.13037e-06	0.000217548	-0.705516	0.151331	6.18917	0.119195	0.00806566	0.0262859	0.0154645	0.0262859
CAMK2D	ENST00000394524.7	3.23334e-06	0.000223296	-1.24986	0.268474	4.97521	0.356844	0.077053	0.00502888	0.0310641	0.0310641
PTP4A2	ENST00000457805.6	3.32412e-06	0.000228849	-0.871053	0.187335	5.42985	0.233728	0.0291247	0.0118972	0.0235169	0.0235169
KLC1	ENST00000445352.8	3.36709e-06	0.000231086	-6.07895	1.30813	2.32413	8.71574	2.01502	0.366095	0.551787	0.551787
UBE2M	ENST00000595957.5	3.41714e-06	0.000233314	-0.861787	0.18557	5.53618	0.179156	0.0231267	0.0285275	0.022047	0.0285275
MIXL1	ENST00000366810.5	3.64186e-06	0.000246365	-1.16755	0.252124	4.13895	0.370539	0.0260278	0.03209	0.0693219	0.0693219
PLK2	ENST00000274289.8	3.74638e-06	0.000252661	-1.09941	0.237712	6.08226	0.293575	0.00399149	0.0807691	0.0162068	0.0807691
HSP90AA1	ENST00000216281.12	3.76992e-06	0.00025399	-0.638173	0.138023	10.5347	0.120252	2.78473e-05	0.0285475	0.020381	0.0285475
MYO6	ENST00000615563.4	4.22532e-06	0.000278711	-0.802169	0.174385	6.42174	0.15993	0.0306657	0.0149497	0.0141105	0.0149497
RAPGEF2	ENST00000644902.1	4.25721e-06	0.000280256	-0.647651	0.140842	6.85659	0.124891	0.0152944	0.0144604	0.0121189	0.0144604
TRIM53AP	ENST00000532014.1	4.37405e-06	0.000286806	-2.81226	0.612324	2.81826	2.08583	0.220732	-0.0434648	0.34168	0.34168
TMF1	ENST00000488010.5	4.39511e-06	0.000287617	-0.661636	0.144092	5.76828	0.138288	0.012083	0.0173626	0.0190607	0.0190607
QPCT	ENST00000338415.8	4.41122e-06	0.00028825	-0.735011	0.160098	6.09674	0.279445	0.00398606	0.0344611	0.0161008	0.0344611
PABPC1	ENST00000519004.5	4.44227e-06	0.000289557	-7.85164	1.71077	4.74156	15.4077	0.955049	3.43505	0.0369749	3.43505
MAGEA3	ENST00000370278.4	4.70532e-06	0.000304603	-2.60229	0.568495	3.98331	1.65836	0.101709	0.383071	0.0837431	0.383071
PNPT1	ENST00000415374.5	4.83404e-06	0.000311412	-0.726013	0.1588	6.73854	0.127205	0.00382996	0.0339963	0.0126059	0.0339963
ANKRD17	ENST00000558247.5	5.13427e-06	0.000327563	-0.717719	0.157421	7.18344	0.157915	0.0154087	0.0217634	0.0110473	0.0217634
ZNF91	ENST00000397082.2	5.33874e-06	0.000338325	-0.903548	0.198538	5.47837	0.267746	0.0362835	0.0178584	0.0228423	0.0228423
MAPKAP1	ENST00000394060.7	5.39056e-06	0.000340439	-0.837472	0.184101	5.63417	0.153034	0.0301336	-0.00260589	0.020706	0.020706
YBX3	ENST00000540975.5	5.86037e-06	0.000367161	-6.61852	1.4606	2.63911	10.6146	0.328425	2.87161	0.408684	2.87161
CYRIA	ENST00000381323.7	5.93076e-06	0.000370518	-0.701941	0.154994	5.5463	0.126785	0.00457226	0.0314622	0.0219084	0.0314622
LITAF	ENST00000413364.6	6.01339e-06	0.000373564	-0.650309	0.143686	7.65731	0.111487	0.00769791	0.0232704	0.0101165	0.0232704
EPCAM	ENST00000456133.5	6.00984e-06	0.000373564	-5.51051	1.21751	2.62674	6.58951	1.80981	-1.57165	0.413695	0.413695
BEX3	ENST00000372634.1	6.17058e-06	0.000381538	-0.694191	0.153567	6.58547	0.261854	0.0220725	-0.00474789	0.0133015	0.0133015
PLA2G4A	ENST00000367466.4	6.33018e-06	0.000388502	-0.924169	0.204686	4.40959	0.206721	0.0120605	0.0486106	0.0507842	0.0507842
RPGRIP1L	ENST00000563746.5	6.51461e-06	0.000397608	-0.978935	0.217109	4.90463	0.208398	0.0380755	9.16395e-06	0.0326289	0.0326289
VAPB	ENST00000463370.5	6.74843e-06	0.000409611	-0.680202	0.151107	5.94263	0.11396	0.0169171	-0.00691056	0.0173327	0.0173327
IL10RA	ENST00000227752.7	6.89334e-06	0.000415737	-4.07495	0.906158	1.67915	4.51868	0.170915	1.06077	0.948262	1.06077
ZNF876P	ENST00000398732.3	7.03785e-06	0.000422143	-0.670692	0.14929	5.56246	0.108991	0.0117442	0.0202012	0.0216872	0.0216872
SCARB2	ENST00000639715.1	7.18634e-06	0.000429105	-5.8875	1.3118	2.54051	10.54	2.13121	0.36841	0.45004	0.45004
TFCP2	ENST00000549867.5	7.62925e-06	0.000451477	-0.790559	0.176648	5.38038	0.176278	0.0219355	0.0248713	0.0242161	0.0248713
SMG1	ENST00000569764.1	7.74612e-06	0.000455993	-0.72755	0.162687	4.95698	0.299951	0.00824767	0.0290732	0.031453	0.031453
GMNN	ENST00000356509.7	7.78469e-06	0.000457809	-0.85662	0.191594	6.12323	0.216647	0.0109839	0.0440783	0.0159115	0.0440783
MTREX	ENST00000506750.5	7.95575e-06	0.000465387	-1.08136	0.242111	6.88881	0.28489	0.0759311	-0.0302943	0.0119957	0.0119957
ZNF681	ENST00000402377.3	8.18469e-06	0.000477092	-0.589676	0.132206	6.10528	0.0900718	0.00231682	0.0239007	0.0160392	0.0239007
RLN2	ENST00000416837.1	8.30272e-06	0.000482696	-3.40976	0.764996	1.91935	2.89578	0.0950995	0.305088	0.782729	0.782729
STK24	ENST00000491878.5	8.34201e-06	0.000484129	-1.09778	0.246347	5.22531	0.270052	0.0644954	-0.0144557	0.0265351	0.0265351
STOML2	ENST00000619795.4	8.54353e-06	0.000494523	-4.51295	1.0139	2.30901	5.26339	0.982548	-0.724517	0.559435	0.559435
JCAD	ENST00000375377.2	8.78823e-06	0.000506472	-0.757379	0.170388	4.81894	0.145863	0.00877935	0.0207708	0.0347688	0.0347688
ROR2	ENST00000550066.5	9.22723e-06	0.000524012	-4.93284	1.11237	1.8097	5.94479	1.00032	0.83886	0.855736	0.855736
PPM1A	ENST00000325658.3	9.35442e-06	0.000530324	-0.700406	0.158049	5.73949	0.139685	0.00408211	0.033387	0.019388	0.033387
HNRNPU	ENST00000366525.8	9.71206e-06	0.000547317	-7.04077	1.59168	3.03672	15.201	1.54793	2.25224	0.267689	2.25224
ARHGAP28	ENST00000314319.7	9.70497e-06	0.000547317	-0.975696	0.220564	4.86905	0.247243	0.0120221	0.0609505	0.0334824	0.0609505
SEPTIN9	ENST00000585930.5	1.02308e-05	0.000573617	-7.55331	1.7119	3.25	14.0265	0.937885	3.45802	0.205484	3.45802
SYNPO2	ENST00000610556.4	1.04363e-05	0.000584148	-0.730749	0.16578	4.92274	0.13915	0.00901315	0.0183302	0.0322116	0.0322116
AC114801.3	ENST00000510231.1	1.06058e-05	0.000591633	-4.91913	1.11686	2.24646	5.60418	1.27927	-0.143277	0.591781	0.591781
SEPTIN10	ENST00000397714.6	1.07751e-05	0.000598052	-0.668225	0.151835	6.59121	0.155371	0.021306	0.00598814	0.0132746	0.0132746
SNX1	ENST00000559389.1	1.08051e-05	0.000598713	-0.859767	0.195384	4.79192	0.177445	0.0217554	0.0198446	0.0355069	0.0355069
MDFIC	ENST00000393486.5	1.11882e-05	0.00061787	-4.82146	1.09757	3.1626	5.8756	1.57758	-0.800409	0.229425	0.229425
SON	ENST00000492229.1	1.17867e-05	0.000643938	-1.06463	0.242984	4.55325	0.522661	0.0447802	-0.00920769	0.0437817	0.0437817
INTS11	ENST00000528879.5	1.20317e-05	0.000654622	-5.49733	1.25596	2.53767	7.38798	1.91486	-0.203301	0.451281	0.451281
CR383656.13	ENST00000551951.1	1.21474e-05	0.000660374	-0.854665	0.195355	4.54252	0.226813	0.0130006	0.00916581	0.044245	0.044245
FANCL	ENST00000233741.8	1.21669e-05	0.000660725	-0.622413	0.14228	6.10895	0.11123	0.0143525	0.00861827	0.0160128	0.0160128
NAMPTP1	ENST00000440465.1	1.2213e-05	0.00066226	-0.610784	0.139648	5.44756	0.101426	0.00598256	0.0131421	0.0232696	0.0232696
OXTR	ENST00000316793.7	1.26648e-05	0.000682793	-0.996024	0.228142	5.3895	0.250345	0.00533397	0.0727389	0.0240862	0.0727389
ADAMTS1	ENST00000284984.8	1.27265e-05	0.000684164	-0.847763	0.194229	6.82616	0.177874	0.00137152	0.0552159	0.012239	0.0552159
VAV1	ENST00000602142.6	1.28118e-05	0.000688011	-4.56525	1.04628	2.48701	5.76892	1.16825	-1.10341	0.473815	0.473815
HAPLN1	ENST00000274341.8	1.28574e-05	0.000689899	-0.855868	0.196187	4.54898	0.196182	0.0137691	-0.000737487	0.0439647	0.0439647
FBXO15	ENST00000580806.5	1.30903e-05	0.000699561	-0.887501	0.203621	4.44739	0.233438	0.0134229	0.0176041	0.0487694	0.0487694
HERC6	ENST00000264346.11	1.33581e-05	0.000713292	-0.621709	0.142785	5.65641	0.0992781	0.0101705	0.0133975	0.020411	0.020411
PIFO	ENST00000369738.9	1.38018e-05	0.000732848	-0.746821	0.171802	4.86262	0.123891	0.010632	0.0114956	0.0336418	0.0336418
LCP1	ENST00000323076.7	1.38587e-05	0.00073469	-2.19752	0.505632	6.57069	1.33309	0.00708641	0.37641	0.0133712	0.37641
GPD2	ENST00000438166.7	1.39235e-05	0.000736943	-0.691803	0.159216	6.7399	0.123343	0.00865066	0.0293739	0.0126	0.0293739
PSMD6	ENST00000482510.5	1.42054e-05	0.000746815	-1.48197	0.341415	6.06156	0.804978	0.158485	-0.0515753	0.0163617	0.0163617
SRPX	ENST00000378533.4	1.4541e-05	0.000761099	-0.606822	0.139965	5.88733	0.149342	0.00793939	0.0214458	0.0178375	0.0214458
RAI14	ENST00000506376.1	1.4565e-05	0.000761755	-7.20918	1.66295	3.06427	12.8917	1.12254	3.02557	0.25897	3.02557
TRIM49C	ENST00000448984.1	1.46149e-05	0.000763759	-2.18707	0.504582	3.18755	1.47128	0.159546	0.200287	0.222358	0.222358
OR7E12P	ENST00000344740.4	1.47863e-05	0.000770333	-0.758851	0.175179	5.0846	0.299683	0.0067466	0.0392852	0.0289202	0.0392852
TRIM64B	ENST00000329862.6	1.48879e-05	0.000773752	-2.8713	0.663065	2.59558	2.48757	0.195527	0.463957	0.426548	0.463957
SSBP3	ENST00000528930.5	1.51741e-05	0.000787388	-1.21839	0.281633	5.47072	0.333051	0.0960277	-0.0238681	0.0229481	0.0229481
MT1X	ENST00000394485.5	1.53232e-05	0.00079202	-1.05248	0.243405	6.67629	0.508203	0.00157364	0.0872956	0.0128837	0.0872956
ESF1	ENST00000617257.1	1.53475e-05	0.000792654	-0.974245	0.22533	5.16456	0.262011	0.0486374	-0.0118846	0.0275228	0.0275228
TNFSF9	ENST00000245817.5	1.56058e-05	0.000802859	-1.39877	0.323792	3.88484	0.502453	0.0273616	0.1299	0.0944957	0.1299
TARBP1	ENST00000040877.2	1.56893e-05	0.000805471	-0.761716	0.176373	4.81499	0.154194	0.0104618	0.0361992	0.0348746	0.0361992
NDUFAF4	ENST00000478382.1	1.58572e-05	0.000812008	-0.754292	0.174749	4.893	0.129165	0.0129032	0.0147012	0.0329026	0.0329026
CDK2AP1	ENST00000618072.4	1.61577e-05	0.000826114	-0.795846	0.184553	6.91574	0.207335	0.0127995	0.0382903	0.0118958	0.0382903
SLC30A7	ENST00000357650.9	1.61492e-05	0.000826114	-0.592216	0.137329	6.14418	0.093439	0.0125229	0.000931723	0.0157658	0.0157658
EOGT	ENST00000615922.1	1.64402e-05	0.000837322	-5.15734	1.19703	1.91743	6.60142	1.15123	0.998085	0.783967	0.998085
RPL14	ENST00000465325.1	1.65585e-05	0.00084205	-3.43725	0.798085	2.77933	2.93128	0.600016	0.353349	0.355394	0.355394
TRIP11	ENST00000554357.5	1.72895e-05	0.000871193	-0.701804	0.163313	5.50069	0.145001	0.0174723	0.00680336	0.0225345	0.0225345
NA	ENST00000648940.1	1.7359e-05	0.000874028	-0.691267	0.160894	8.13985	0.134048	0.000415074	0.0384154	0.00982278	0.0384154
AL356432.3	ENST00000568952.1	1.76235e-05	0.000885323	-1.78794	0.416473	4.56343	0.835966	0.127031	0.133144	0.0433503	0.133144
ARHGEF1	ENST00000347545.8	1.78497e-05	0.000896007	-5.2419	1.22183	2.96792	7.02596	1.94909	-1.74418	0.290197	0.290197
PSME3IP1	ENST00000562324.5	1.79426e-05	0.000899303	-1.33521	0.311307	4.55339	0.486571	0.101592	-0.0125488	0.0437754	0.0437754
RAB11A	ENST00000569896.1	1.82089e-05	0.000910581	-0.647014	0.150967	5.73131	0.173116	0.0147032	0.00122386	0.0194835	0.0194835
EMC2	ENST00000520294.5	1.85294e-05	0.000924516	-0.668588	0.156142	5.12275	0.115803	0.00833257	0.0255165	0.0282381	0.0282381
NAP1L1	ENST00000551992.5	1.85511e-05	0.000924859	-0.923313	0.215644	5.36131	0.22654	0.0230005	0.0467531	0.0244896	0.0467531
NAV3	ENST00000397909.7	1.87459e-05	0.000931514	-0.843827	0.197187	5.50481	0.178228	0.0298773	0.0284467	0.0224778	0.0284467
PDE4B	ENST00000371045.9	1.87463e-05	0.000931514	-1.3151	0.307314	6.36137	0.486509	0.00275855	0.138904	0.0144342	0.138904
RAB23	ENST00000317483.4	1.91635e-05	0.000944754	-0.627277	0.146751	5.54211	0.0932152	0.0103382	0.0109386	0.0219657	0.0219657
GPATCH2	ENST00000366935.8	1.95167e-05	0.000957159	-0.64805	0.151756	5.18529	0.0940401	0.00736524	0.000689499	0.0271794	0.0271794
AC139769.1	ENST00000471224.5	1.95309e-05	0.000957159	-0.724279	0.169613	4.86598	0.116375	0.00959463	0.00417079	0.0335582	0.0335582
MARK3	ENST00000553942.5	1.99169e-05	0.000971757	-0.613715	0.143868	6.30078	0.0869881	0.01627	-0.0120986	0.0147769	0.0147769
SMARCAD1	ENST00000354268.8	2.09465e-05	0.00101081	-0.601275	0.141325	6.75794	0.0946563	0.0151334	0.0148258	0.0125219	0.0148258
FLG	ENST00000368799.1	2.12658e-05	0.00102249	-3.16998	0.745673	2.17079	1.97864	0.201641	-0.0818991	0.632403	0.632403
ASPH	ENST00000517903.5	2.29172e-05	0.00108922	-5.85593	1.38295	2.39864	8.64639	1.7279	1.14091	0.515096	1.14091
XPO1	ENST00000406957.5	2.32328e-05	0.00110343	-0.77258	0.182586	7.99995	0.178343	0.00369354	0.0463131	0.00984362	0.0463131
ST3GAL5	ENST00000639743.1	2.34646e-05	0.00111205	-4.20821	0.995065	1.36044	4.13483	0.285806	0.792375	1.19943	1.19943
DPPA3	ENST00000345088.3	2.35698e-05	0.00111505	-1.20926	0.286007	3.85491	0.417512	0.0246693	0.0522828	0.0980309	0.0980309
NBR1	ENST00000341165.10	2.35785e-05	0.00111505	-6.20101	1.46665	2.56733	9.68738	0.908667	2.31795	0.438473	2.31795
CHMP4C	ENST00000297265.5	2.43662e-05	0.0011482	-0.703136	0.166596	4.86714	0.234241	0.00810204	0.0204353	0.0335295	0.0335295
KIAA1143	ENST00000484437.1	2.52162e-05	0.00118235	-1.26181	0.299515	3.87685	0.329697	0.039137	-0.00668677	0.0954271	0.0954271
KIAA1143	ENST00000626149.1	2.52162e-05	0.00118235	-1.26181	0.299515	3.87685	0.329697	0.039137	-0.00668677	0.0954271	0.0954271
ME2	ENST00000638410.1	2.54948e-05	0.00119204	-0.774986	0.184066	6.52152	0.153692	0.028613	0.0222073	0.0136073	0.0222073
TOP2B	ENST00000264331.8	2.54881e-05	0.00119204	-0.817414	0.19414	7.40937	0.281304	0.0309085	0.025627	0.0105186	0.025627
PABPC4	ENST00000372862.7	2.56365e-05	0.00119595	-1.21742	0.289233	5.76593	0.405519	0.0791458	0.0463378	0.0190869	0.0463378
FABP7	ENST00000368444.8	2.64154e-05	0.0012246	-0.670284	0.159502	5.09602	0.115018	0.00616504	0.0319963	0.0287129	0.0319963
EPS8L2	ENST00000318562.13	2.64672e-05	0.00122493	-0.870997	0.207286	5.97388	0.21938	0.0234546	0.0409967	0.0170632	0.0409967
CALB1	ENST00000518457.5	2.64761e-05	0.00122493	-1.51365	0.360235	5.13236	0.733996	0.103377	0.0912768	0.0280709	0.0912768
RAD50	ENST00000533482.5	2.67203e-05	0.00123537	-0.940567	0.223957	6.59932	0.245305	0.00701063	0.0682248	0.0132367	0.0682248
ENSA	ENST00000362052.7	2.69038e-05	0.00124125	-0.968421	0.230675	4.68924	0.252745	0.0200594	0.0597569	0.0386412	0.0597569
PPARA	ENST00000624793.1	2.76978e-05	0.00127412	-0.601461	0.143492	5.92826	0.134864	0.00304754	0.0278372	0.0174603	0.0278372
MAZ	ENST00000568544.5	2.78001e-05	0.00127637	-0.986047	0.23529	5.7791	0.235465	0.0641009	0.00203055	0.0189411	0.0189411
KRR1	ENST00000551070.5	2.85645e-05	0.00130544	-0.722967	0.172768	4.90499	0.169837	0.0121528	0.027643	0.0326203	0.0326203
CBLN1	ENST00000219197.11	2.85714e-05	0.00130544	-1.37075	0.327572	4.43644	0.50364	0.0168002	0.144155	0.0493399	0.144155
TRIM49D1	ENST00000420869.2	2.89002e-05	0.00131845	-3.34212	0.799175	2.15172	3.08026	0.315064	0.419741	0.642955	0.642955
TRIM49D2	ENST00000623787.3	2.89002e-05	0.00131845	-3.34212	0.799175	2.15172	3.08026	0.315064	0.419741	0.642955	0.642955
CALD1	ENST00000361901.6	2.89158e-05	0.00131845	-0.966126	0.231029	8.59837	0.23864	0.000766094	0.0792953	0.0101237	0.0792953
SPP1	ENST00000237623.11	2.93403e-05	0.00133159	-1.1066	0.264831	5.70529	0.323685	0.0263079	0.0788956	0.0197945	0.0788956
SYNE2	ENST00000344113.8	2.97621e-05	0.00134775	-6.17526	1.47901	3.45721	9.61936	1.66287	1.61831	0.158318	1.61831
HPGD	ENST00000296522.11	3.00922e-05	0.00136083	-3.54526	0.849618	3.17984	3.35436	0.858254	-0.0300372	0.224523	0.224523
METTL9	ENST00000615720.4	3.05216e-05	0.00137462	-5.25736	1.2609	2.04042	8.8061	0.804676	1.58012	0.707325	1.58012
NA	ENST00000640441.1	3.05216e-05	0.00137462	-5.25736	1.2609	2.04042	8.8061	0.804676	1.58012	0.707325	1.58012
CORO2A	ENST00000375077.5	3.05865e-05	0.00137473	-0.686225	0.1646	7.72128	0.18806	0.000522156	0.0401174	0.0100412	0.0401174
PDZD4	ENST00000484792.5	3.05565e-05	0.00137473	-0.757885	0.181778	5.61991	0.149175	0.0083373	0.0412278	0.0209003	0.0412278
CPSF6	ENST00000456847.7	3.19332e-05	0.0014275	-0.816629	0.196342	6.3317	0.265716	0.0432255	0.000536816	0.0145996	0.0145996
SMAP2	ENST00000372708.5	3.35941e-05	0.00148897	-5.39945	1.30182	2.3662	6.10028	2.01123	-1.54746	0.530862	0.530862
MAD2L1	ENST00000512484.5	3.37051e-05	0.00149159	-0.591253	0.142578	5.7742	0.0917396	0.00793555	0.0225573	0.0189951	0.0225573
TARS1	ENST00000507716.5	3.39036e-05	0.00149837	-0.631868	0.152422	7.48904	0.109505	0.0244786	-0.00298198	0.0103699	0.0103699
EOGT	ENST00000540764.5	3.48435e-05	0.00153071	-0.946036	0.228552	4.83258	0.22636	0.0439458	0.0163504	0.0344083	0.0344083
SYT2	ENST00000367268.5	3.53834e-05	0.00155031	-0.805239	0.194703	6.92593	0.212358	0.00119481	0.0556692	0.0118587	0.0556692
LCTL	ENST00000537670.5	3.57549e-05	0.00156365	-0.958718	0.231948	4.53936	0.213774	0.0363168	-0.0106937	0.0443832	0.0443832
MYORG	ENST00000297625.8	3.57382e-05	0.00156365	-0.647061	0.156543	6.5094	0.131791	0.00155607	0.0352025	0.0136666	0.0352025
MSH2	ENST00000543555.5	3.59104e-05	0.00156769	-3.735	0.903848	6.52851	3.05828	1.21184	-0.680223	0.0135733	0.0135733
GRB14	ENST00000488342.5	3.69363e-05	0.0016024	-0.688637	0.166908	5.2864	0.129347	0.0161949	0.0229618	0.0255925	0.0255925
CAMK4	ENST00000282356.9	3.75921e-05	0.00162555	-0.639467	0.155143	5.10705	0.123588	0.00700567	0.0290982	0.0285152	0.0290982
LRRFIP1	ENST00000489603.5	3.8672e-05	0.00166572	-1.44386	0.350855	3.94309	0.435642	0.0966735	-0.0774312	0.0879755	0.0879755
CCDC3	ENST00000378825.5	3.92936e-05	0.00168372	-0.7356	0.178909	4.77719	0.224293	0.0120891	0.0186868	0.0359234	0.0359234
CAND1	ENST00000540319.5	3.96821e-05	0.00169598	-0.599316	0.145843	6.04857	0.13319	0.0082321	0.0236732	0.0164608	0.0236732
CUL2	ENST00000421317.4	4.23316e-05	0.00179875	-0.649936	0.158739	6.4308	0.124215	0.00474652	0.0330505	0.0140633	0.0330505
KCNMB1	ENST00000274629.9	4.3165e-05	0.00182479	-1.02286	0.250096	4.0987	0.262035	0.0210575	0.0628874	0.0727647	0.0727647
CCAR1	ENST00000540210.5	4.36225e-05	0.00184295	-0.633192	0.154913	6.48135	0.190534	0.0221915	0.00115462	0.0138056	0.0138056
KTN1	ENST00000438792.6	4.46698e-05	0.0018788	-0.591529	0.144915	7.28274	0.161984	0.0138936	0.017607	0.010795	0.017607
AAMP	ENST00000461911.1	4.49084e-05	0.00188574	-5.17136	1.26729	2.08627	5.25433	1.72879	-1.52138	0.680231	0.680231
PRKD3	ENST00000379066.5	4.63605e-05	0.00193637	-0.822936	0.202034	7.40302	0.173118	0.0250454	0.0361811	0.0105313	0.0361811
NOP56	ENST00000466447.5	4.66921e-05	0.00194899	-1.10467	0.271312	5.93274	0.325021	0.0268855	0.08353	0.0174203	0.08353
SECISBP2	ENST00000425851.1	4.70888e-05	0.00196431	-1.02466	0.251783	4.29276	0.216635	0.037234	-0.0116495	0.0578577	0.0578577
SEPHS1	ENST00000545675.5	4.72579e-05	0.00196764	-0.843385	0.207281	6.33003	0.250703	0.0498393	0.00752415	0.0146091	0.0146091
LRRFIP1	ENST00000474195.1	4.74956e-05	0.0019763	-1.21155	0.297853	5.31642	0.527651	0.10793	-0.0135508	0.0251445	0.0251445
CXCR4	ENST00000241393.3	4.89378e-05	0.00202611	-2.30504	0.567655	3.97469	1.5904	0.398716	-0.0721567	0.0846326	0.0846326
FLNC	ENST00000325888.12	4.92556e-05	0.00203591	-0.724056	0.178377	7.26947	0.151187	0.00155195	0.0461756	0.0108268	0.0461756
CTSC	ENST00000527018.5	4.93054e-05	0.00203596	-0.741158	0.182601	6.11805	0.323767	0.0239391	0.0260756	0.0159481	0.0260756
NA	ENST00000620031.5	4.93295e-05	0.00203596	-1.69539	0.417709	6.83023	1.03992	0.20427	0.0574517	0.0122227	0.0574517
SEMA6A	ENST00000513137.5	4.95718e-05	0.00204468	-0.654186	0.161223	5.94713	0.270216	0.00501487	0.0339747	0.0172932	0.0339747
SYNE2	ENST00000554805.6	5.13127e-05	0.00210077	-4.40834	1.0886	1.64272	5.01596	0.678706	1.09885	0.975128	1.09885
HPS4	ENST00000483631.1	5.19418e-05	0.0021239	-4.08398	1.00921	1.44661	4.18573	0.399913	0.982667	1.12784	1.12784
TRIM53CP	ENST00000531490.2	5.26074e-05	0.00214317	-2.29845	0.568399	2.75197	1.27542	0.119334	-0.0461003	0.365283	0.365283
HADH	ENST00000638559.1	5.4041e-05	0.00218009	-4.78018	1.18397	2.94843	5.14851	1.80593	-1.28084	0.296735	0.296735
CCDC141	ENST00000446116.5	5.49268e-05	0.00221044	-1.6587	0.411221	4.23978	0.792104	0.12077	0.132884	0.0615156	0.132884
KDM4E	ENST00000450979.2	5.53596e-05	0.00222379	-1.88128	0.466615	3.17413	1.19789	0.100457	0.0054909	0.226136	0.226136
HMMR	ENST00000432118.6	5.58877e-05	0.00224008	-1.0131	0.25142	5.79933	0.233052	0.0760956	-0.0256734	0.0187222	0.0187222
DNAJC21	ENST00000512136.1	5.59941e-05	0.00224248	-0.796793	0.19776	4.48519	0.137648	0.0117833	0.00823506	0.0468803	0.0468803
DHX29	ENST00000251636.10	5.72685e-05	0.00227834	-0.614896	0.152815	7.16431	0.0938383	0.0239291	0.00621798	0.0110996	0.0110996
MAP2K2	ENST00000599021.1	5.74579e-05	0.0022845	-4.3588	1.08347	1.64282	3.63897	0.785795	-0.757159	0.975052	0.975052
SVEP1	ENST00000374469.6	5.92002e-05	0.00233832	-0.600074	0.149422	5.16049	0.117477	0.00589908	0.0208558	0.0275912	0.0275912
REEP2	ENST00000613650.1	5.95158e-05	0.00234798	-5.55866	1.38457	2.19595	7.97727	1.68288	1.19267	0.618694	1.19267
PPP5C	ENST00000493347.5	6.00984e-05	0.00236673	-4.30371	1.0726	1.64872	5.87313	0.438805	1.28689	0.970666	1.28689
FUS	ENST00000568901.2	6.05284e-05	0.00237899	-1.3019	0.324603	5.09797	0.575351	0.059355	0.098696	0.0286778	0.098696
JADE1	ENST00000610919.4	6.09095e-05	0.00239014	-0.854765	0.213198	7.88729	0.189531	0.0078444	0.0603356	0.0098983	0.0603356
NLRP10	ENST00000328600.3	6.19825e-05	0.00242181	-0.959704	0.239619	4.09521	0.24266	0.0130532	0.00749988	0.0730725	0.0730725
BCL2L14	ENST00000308721.9	6.20847e-05	0.00242181	-4.02834	1.00589	2.08325	4.37028	0.835736	-0.80856	0.68199	0.68199
GET1	ENST00000380708.5	6.20612e-05	0.00242181	-1.1721	0.292671	4.83977	0.341212	0.0942627	-0.00710483	0.0342214	0.0342214
BCL2L14	ENST00000631317.2	6.20847e-05	0.00242181	-4.02834	1.00589	2.08325	4.37028	0.835736	-0.80856	0.68199	0.68199
NLRP10	ENST00000625327.2	6.19825e-05	0.00242181	-0.959704	0.239619	4.09521	0.24266	0.0130532	0.00749988	0.0730725	0.0730725
PAFAH1B1	ENST00000609078.1	6.28438e-05	0.00243856	-0.651334	0.162758	5.2278	0.115859	0.0132391	0.00301961	0.0264959	0.0264959
EDC4	ENST00000574770.5	6.32297e-05	0.0024521	-3.93779	0.984343	3.49855	4.09614	1.30284	0.107046	0.150557	0.150557
CCNYL1	ENST00000392209.7	6.34948e-05	0.00245949	-0.588199	0.147071	5.85869	0.0930841	0.0143307	0.00530724	0.0181139	0.0181139
KITLG	ENST00000644744.1	6.39346e-05	0.00247219	-1.12777	0.282098	5.01781	0.340448	0.0709892	0.0483796	0.0301926	0.0483796
LINGO1	ENST00000557798.1	6.68111e-05	0.002558	-4.79751	1.20318	1.71923	5.46454	1.25223	0.279247	0.919228	0.919228
CEMIP	ENST00000220244.7	6.82933e-05	0.00261022	-1.13442	0.284875	4.92208	0.508424	0.0136572	0.108073	0.0322266	0.108073
AL139300.1	ENST00000472726.2	6.8819e-05	0.00262425	-0.700014	0.175868	6.38004	0.127307	0.0111192	0.0352753	0.0143323	0.0352753
WAPL	ENST00000618527.4	6.96447e-05	0.00265115	-5.64271	1.41866	3.36896	14.3224	1.76398	1.25491	0.176721	1.25491
HSP90AB2P	ENST00000602906.1	7.09597e-05	0.00269805	-1.1548	0.290658	3.84038	0.410238	0.0269306	-0.0027787	0.0997923	0.0997923
SLC66A3	ENST00000295083.8	7.14171e-05	0.00270826	-0.644692	0.162329	5.11764	0.0880514	0.0111983	-0.00304719	0.0283277	0.0283277
CUL1	ENST00000602748.5	7.14977e-05	0.00270826	-0.637424	0.16051	6.73072	0.157437	0.0260049	0.00280183	0.0126402	0.0126402
ARMC9	ENST00000349938.8	7.24819e-05	0.00273381	-0.66928	0.16867	6.11677	0.155455	0.00453201	0.0381422	0.0159571	0.0381422
MAP2K6	ENST00000590474.7	7.29772e-05	0.0027464	-0.588357	0.148337	7.48363	0.0922676	0.00063678	0.0323689	0.0103794	0.0323689
UBA2	ENST00000592841.5	7.33326e-05	0.00275664	-1.12259	0.28311	4.22699	0.38548	0.0411305	0.0790968	0.0624437	0.0790968
FBXO7	ENST00000397426.5	7.4419e-05	0.00279114	-0.870321	0.219684	6.30922	0.246356	0.0395525	0.0328391	0.014728	0.0328391
MAP3K5	ENST00000359015.5	7.49973e-05	0.00280805	-0.614228	0.155114	5.028	0.0917323	0.00609921	0.00985951	0.0299914	0.0299914
INPP5D	ENST00000445964.6	7.71809e-05	0.00286709	-1.49633	0.378531	4.17909	0.59993	0.134354	0.0805743	0.0660771	0.0805743
INPP5D	ENST00000630854.3	7.71809e-05	0.00286709	-1.49633	0.378531	4.17909	0.59993	0.134354	0.0805743	0.0660771	0.0805743
DAP3	ENST00000421487.6	7.77426e-05	0.00288634	-0.654876	0.165739	6.13289	0.0941478	0.0253601	-0.00756786	0.0158439	0.0158439
CCDC80	ENST00000475181.1	7.95821e-05	0.002948	-1.533	0.388528	3.69461	0.594206	0.107242	0.0948814	0.119189	0.119189
WDR3	ENST00000349139.6	8.04543e-05	0.002972	-0.597863	0.151625	7.46667	0.0948587	0.000669483	0.0338157	0.0104097	0.0338157
PCMT1	ENST00000367384.7	8.19804e-05	0.00301827	-0.632626	0.160625	5.41281	0.0949582	0.0149441	0.0033785	0.0237563	0.0237563
EHHADH	ENST00000231887.8	8.2572e-05	0.00303161	-0.817318	0.207609	5.72542	0.208818	0.00814367	0.0565087	0.019553	0.0565087
CHORDC1	ENST00000457199.6	8.29023e-05	0.00303868	-0.585159	0.148674	5.61841	0.107027	0.00581096	0.027345	0.0209209	0.027345
CHORDC1	ENST00000647220.1	8.29023e-05	0.00303868	-0.585159	0.148674	5.61841	0.107027	0.00581096	0.027345	0.0209209	0.027345
SUB1	ENST00000511615.5	8.3016e-05	0.00304116	-0.673627	0.171166	5.52804	0.135826	0.0217881	0.0119947	0.0221586	0.0221586
IFT74	ENST00000380062.9	8.48871e-05	0.00309651	-0.591829	0.150586	5.72171	0.0915665	0.00613638	0.0278779	0.0195969	0.0278779
AKIRIN1	ENST00000372984.8	8.49012e-05	0.00309651	-3.45955	0.880264	4.0314	3.73686	1.08334	-0.468976	0.078962	0.078962
HSPA9	ENST00000512328.1	8.53826e-05	0.00311006	-0.671904	0.171022	5.89674	0.124207	0.00927944	0.0345932	0.0177489	0.0345932
IL32	ENST00000444393.7	8.5509e-05	0.00311181	-4.59706	1.17021	1.44212	4.64426	0.922582	-0.0934239	1.1315	1.1315
PKM	ENST00000565143.1	8.73431e-05	0.0031681	-0.804272	0.204999	4.77576	0.170789	0.0141265	0.0489101	0.0359643	0.0489101
ACLY	ENST00000353196.5	8.90356e-05	0.00321539	-1.09931	0.280531	7.25887	0.346262	0.0383475	0.0796992	0.0108527	0.0796992
HSPE1-MOB4	ENST00000604458.1	8.99575e-05	0.00323984	-0.869866	0.22212	5.23089	0.235361	0.047559	0.0108822	0.0264471	0.0264471
EEF2	ENST00000598436.1	9.08958e-05	0.00327007	-1.35456	0.346109	4.24865	0.553773	0.0756496	0.104037	0.0608827	0.104037
CCNK	ENST00000555049.5	9.18909e-05	0.0032987	-4.55557	1.16479	2.96454	5.21046	1.74378	-0.00439866	0.291323	0.291323
FNDC3A	ENST00000398316.7	9.42985e-05	0.00336504	-0.715706	0.183288	6.1701	0.221787	0.0348014	0.0103866	0.0155904	0.0155904
ECHDC1	ENST00000368289.6	9.5283e-05	0.00339468	-4.98488	1.27742	2.85373	5.54469	2.11843	-1.41122	0.329277	0.329277
RPS27L	ENST00000439025.1	9.65099e-05	0.00341266	-0.670431	0.17194	5.43505	0.120481	0.00551348	0.0388318	0.0234441	0.0388318
ACTR10	ENST00000554402.6	9.68314e-05	0.0034222	-0.585769	0.150259	5.69842	0.0754745	0.0139881	-0.00496342	0.0198785	0.0198785
HSPA4	ENST00000615899.1	9.7289e-05	0.00343287	-0.794893	0.203962	8.38959	0.176437	0.00105603	0.0613449	0.00991542	0.0613449
CENPE	ENST00000380026.7	0.00010023	0.00351044	-0.606973	0.156033	7.29945	0.121603	0.0049689	0.0315504	0.0107556	0.0315504
DEF8	ENST00000610455.4	0.000101107	0.0035321	-0.923307	0.237481	4.83164	0.208921	0.0501629	0.0123934	0.0344329	0.0344329
GNL2	ENST00000373062.8	0.000101012	0.0035321	-0.598443	0.153915	8.08378	0.0951341	0.000335862	0.0351987	0.00982489	0.0351987
PXN	ENST00000543331.1	0.000102012	0.00355405	-1.37797	0.35462	3.98607	0.547305	0.105173	0.0707497	0.0834606	0.0834606
MRPL3	ENST00000511168.5	0.000106619	0.00368352	-0.98007	0.25292	6.66478	0.443827	0.0296971	0.0662561	0.0129358	0.0662561
NCALD	ENST00000522754.1	0.000106845	0.00368747	-0.641268	0.16551	4.95998	0.12705	0.00970211	0.017262	0.0313883	0.0313883
SERBP1	ENST00000484880.1	0.000113184	0.00386391	-5.3002	1.37295	3.42548	9.1465	1.47792	1.34958	0.164647	1.34958
SRSF11	ENST00000461935.1	0.000113307	0.00386411	-0.795246	0.206013	4.49524	0.145246	0.0172633	-0.00360989	0.0463988	0.0463988
CALML4	ENST00000467188.1	0.000113597	0.003872	-3.03151	0.785456	2.84344	2.55091	0.543192	0.382219	0.332867	0.382219
CCDC25	ENST00000522915.5	0.000113989	0.00388338	-0.88057	0.228203	4.71156	0.20086	0.0402035	0.00412798	0.0379117	0.0379117
HLA-E	ENST00000415649.4	0.000114806	0.00389517	-0.817468	0.211946	5.30759	0.23367	0.00716549	0.0602164	0.0252752	0.0602164
HLA-E	ENST00000415289.4	0.000114806	0.00389517	-0.817468	0.211946	5.30759	0.23367	0.00716549	0.0602164	0.0252752	0.0602164
HLA-E	ENST00000383597.6	0.000114806	0.00389517	-0.817468	0.211946	5.30759	0.23367	0.00716549	0.0602164	0.0252752	0.0602164
HLA-E	ENST00000427936.4	0.000114806	0.00389517	-0.817468	0.211946	5.30759	0.23367	0.00716549	0.0602164	0.0252752	0.0602164
SPCS1	ENST00000423431.5	0.000115414	0.00390976	-4.76145	1.23492	3.11618	5.97167	0.706379	1.58117	0.243047	1.58117
SLA	ENST00000338087.10	0.000117956	0.00397148	-3.34419	0.868546	1.97329	2.34025	0.383108	-0.0589369	0.74845	0.74845
PPP1R17	ENST00000342032.8	0.000119979	0.00403138	-1.62725	0.423082	4.64582	0.846433	0.014947	0.253551	0.0401461	0.253551
DACT1	ENST00000395153.7	0.00012046	0.00404345	-1.41366	0.367645	6.54219	1.08409	0.00315956	0.199585	0.0135072	0.199585
XPNPEP3	ENST00000428799.1	0.000124372	0.00413698	-0.610937	0.159208	5.21381	0.0915317	0.0113031	0.00419746	0.0267179	0.0267179
BZW1	ENST00000410110.6	0.000124945	0.00414979	-0.807682	0.210541	5.51003	0.224535	0.0166099	0.0498816	0.0224059	0.0498816
MTIF2	ENST00000394600.7	0.000127522	0.0042142	-5.66891	1.47967	2.56622	6.50106	2.84519	-2.7528	0.438948	0.438948
ENOPH1	ENST00000505846.5	0.000128291	0.00422485	-1.28136	0.334585	4.38598	0.387101	0.115812	-0.0387692	0.0521085	0.0521085
PLSCR1	ENST00000342435.9	0.000129116	0.00424359	-0.933653	0.243892	4.61606	0.217369	0.0479775	0.00784743	0.0412477	0.0412477
PRAMEF12	ENST00000357726.4	0.00012945	0.00425066	-2.43446	0.636043	2.519	2.17148	0.147339	0.00556972	0.459488	0.459488
ALDH7A1	ENST00000485852.7	0.000130867	0.00428409	-1.05623	0.276151	5.00963	0.234012	0.0840332	-0.0534539	0.0303561	0.0303561
C2orf74	ENST00000426997.5	0.000133635	0.00436392	-0.689017	0.180387	4.78817	0.200177	0.0131973	0.012662	0.0356119	0.0356119
IFNAR1	ENST00000652450.1	0.000136896	0.00444407	-0.704493	0.184726	4.84991	0.132903	0.0172242	0.0306111	0.0339617	0.0339617
ZNF273	ENST00000476120.1	0.000142109	0.00456847	-0.585516	0.153902	5.45468	0.0883497	0.0123582	0.0169786	0.0231706	0.0231706
C1orf112	ENST00000413811.3	0.000145185	0.00464255	-0.853867	0.224751	4.91168	0.184935	0.0433046	0.0198595	0.0324651	0.0324651
BZW1	ENST00000409600.6	0.000145727	0.00465762	-0.922119	0.242775	7.67278	0.264224	0.000901767	0.087508	0.0100973	0.087508
BCLAF1	ENST00000534762.5	0.000148199	0.00472068	-0.621702	0.163862	6.03751	0.117214	0.00837711	0.0318989	0.0165465	0.0318989
UBXN1	ENST00000533476.5	0.000148348	0.00472313	-3.63916	0.959235	2.49002	3.56134	0.907745	0.22777	0.472451	0.472451
ADAMTS5	ENST00000284987.6	0.000149327	0.00474746	-1.06239	0.280152	3.96277	0.257105	0.0318501	0.0233434	0.0858774	0.0858774
BBS9	ENST00000627264.1	0.000153516	0.00485498	-1.09157	0.288371	4.28494	0.359212	0.0223179	0.102418	0.0583794	0.102418
EFTUD2	ENST00000588374.1	0.000159787	0.00502208	-4.1205	1.09142	2.88494	3.75015	1.46837	-0.731238	0.318438	0.318438
TYMS	ENST00000581920.1	0.00016647	0.00518777	-0.959772	0.254911	5.22592	0.335682	0.0709442	0.026351	0.0265255	0.0265255
GALNT3	ENST00000409882.5	0.000168848	0.00524021	-4.86277	1.29275	2.02611	7.65244	1.35492	1.15188	0.715951	1.15188
KIF2C	ENST00000452259.5	0.000169944	0.00526873	-1.4509	0.385883	4.52311	0.537357	0.178252	-0.0240897	0.0451069	0.0451069
TMEM200A	ENST00000617887.4	0.000171406	0.00530662	-0.609896	0.162301	5.76689	0.121817	0.020436	0.000126049	0.0190763	0.0190763
INPP4B	ENST00000513000.5	0.000172048	0.00532077	-2.93239	0.780541	2.05816	2.24809	0.217117	0.342197	0.696749	0.696749
FCHO2	ENST00000512348.5	0.000174418	0.00537512	-0.603003	0.160653	5.32671	0.079596	0.0137213	-0.000389487	0.0249928	0.0249928
ENDOD1	ENST00000278505.5	0.000177048	0.00544307	-0.615204	0.164068	4.86361	0.0809693	0.00676013	0.00640602	0.0336172	0.0336172
FADS2	ENST00000522056.5	0.000180456	0.00551963	-1.44645	0.386245	6.4282	0.600731	0.0440915	0.179686	0.0140768	0.179686
CETN3	ENST00000518458.1	0.000181135	0.00553785	-0.671324	0.179308	4.82416	0.113023	0.0135971	0.0218793	0.0346299	0.0346299
NOP56	ENST00000492135.5	0.000184327	0.00561467	-0.864972	0.231302	7.1386	0.227361	0.00445607	0.0757948	0.0111719	0.0757948
TRRAP	ENST00000355540.7	0.000190055	0.00575207	-0.919538	0.246401	7.16564	0.241633	0.0496974	0.0413725	0.0110959	0.0413725
CCDC80	ENST00000469554.1	0.000191612	0.00578331	-1.71904	0.460891	3.38678	0.749065	0.145827	0.0671024	0.172803	0.172803
SELENOT	ENST00000480740.5	0.000193254	0.00582491	-5.21345	1.39858	2.0119	6.583	2.20945	-0.22715	0.724591	0.724591
CCNA1	ENST00000255465.7	0.000193835	0.0058371	-0.709224	0.190298	5.03261	0.294341	0.0244186	0.0244441	0.0299012	0.0299012
CCDC80	ENST00000439685.6	0.000194192	0.00584519	-1.10247	0.29585	6.07325	0.365013	0.00426557	0.127026	0.0162737	0.127026
CAV1	ENST00000341049.7	0.000201548	0.00602276	-0.981724	0.264112	5.68649	0.259545	0.0468181	0.057815	0.0200265	0.057815
IL2RB	ENST00000216223.10	0.000203091	0.00605521	-1.17296	0.315726	3.69507	0.320714	0.0304008	0.0307232	0.119123	0.119123
TAF1D	ENST00000530769.5	0.000207367	0.00615371	-0.744126	0.20058	5.32605	0.214359	0.0115453	0.0488033	0.0250025	0.0488033
MYO1B	ENST00000392316.5	0.000207418	0.00615371	-1.23063	0.331724	5.8175	0.478733	0.0827647	0.0822961	0.0185307	0.0822961
JAKMIP2	ENST00000333010.6	0.000209316	0.00619334	-1.09758	0.296044	5.25054	0.335113	0.014851	0.116612	0.0261403	0.116612
USP38	ENST00000511739.1	0.000211351	0.00624519	-4.9132	1.32608	3.68972	6.749	1.35405	1.28369	0.119895	1.28369
U2SURP	ENST00000493598.6	0.000213447	0.00629871	-0.727004	0.196352	7.16522	0.146375	0.0041379	0.0536935	0.0110971	0.0536935
ZC3HC1	ENST00000480193.5	0.000218434	0.0063917	-4.14613	1.12158	1.83565	3.70918	1.04886	-1.02396	0.838061	0.838061
MYCBP2	ENST00000357337.10	0.000218984	0.00640067	-1.10023	0.297679	6.95844	0.403962	0.0955398	0.0373793	0.0117431	0.0373793
CDH6	ENST00000514738.5	0.000221845	0.00646006	-1.80351	0.488392	3.35094	0.740176	0.177002	-0.0530733	0.180787	0.180787
FMO5	ENST00000254090.9	0.000224153	0.00652441	-3.55639	0.963762	1.7226	3.29975	0.476445	-0.392513	0.916811	0.916811
STAU1	ENST00000371856.6	0.000229454	0.00665527	-0.81051	0.219998	5.63144	0.179021	0.0494622	0.0231367	0.020743	0.0231367
ARHGAP11A	ENST00000565905.5	0.000230039	0.00666224	-0.728295	0.197717	6.70196	0.159668	0.0458699	-0.00530547	0.0127682	0.0127682
COLEC12	ENST00000582147.1	0.000234483	0.00675987	-0.6308	0.171476	5.078	0.0794984	0.0150649	-0.00870338	0.0290413	0.0290413
USP16	ENST00000334352.8	0.000240745	0.00690406	-4.42572	1.20529	1.74954	5.42572	0.834033	1.34506	0.897642	1.34506
FBLN5	ENST00000267620.14	0.000241467	0.00691634	-0.91698	0.249781	4.26529	0.203648	0.0338675	0.0035833	0.059718	0.059718
CD248	ENST00000311330.4	0.000246475	0.00702575	-1.04251	0.284382	3.84911	0.347055	0.0225786	0.044232	0.098731	0.098731
RPS3	ENST00000528439.5	0.000250653	0.00712948	-3.95772	1.08087	3.29538	4.29565	1.06457	0.687864	0.193979	0.687864
ASNSP1	ENST00000641079.1	0.000257316	0.00729392	-2.61679	0.715974	2.45868	2.29807	0.282151	0.260148	0.486778	0.486778
EXOSC3	ENST00000490516.5	0.000258352	0.00732015	-2.91895	0.798873	2.55062	2.31553	0.380569	0.576728	0.445651	0.576728
TTLL5	ENST00000556976.1	0.000260566	0.00736712	-3.23386	0.88559	2.05118	2.81376	0.475509	0.116798	0.700896	0.700896
RBBP6	ENST00000348022.6	0.000260937	0.00737446	-1.92514	0.527251	5.1388	1.29413	0.38903	-0.0848526	0.0279598	0.0279598
TTC30A	ENST00000355689.6	0.000267322	0.00750999	-0.640322	0.175668	4.75862	0.107522	0.00982544	0.0149126	0.0364635	0.0364635
LRRCC1	ENST00000360375.8	0.000271922	0.0076037	-0.731819	0.201012	5.04289	0.171194	0.0183385	0.0422701	0.0297022	0.0422701
TRPM2	ENST00000397932.6	0.000275892	0.00769196	-3.41457	0.938856	2.6748	3.84614	0.332294	0.989881	0.394502	0.989881
ANXA1	ENST00000257497.11	0.000277164	0.00771839	-1.71746	0.472379	5.68998	0.82946	0.00392367	0.33079	0.0199829	0.33079
ITK	ENST00000519402.5	0.000286919	0.00796583	-1.50334	0.414504	3.31756	0.790703	0.0691273	0.027637	0.188594	0.188594
TASOR	ENST00000493960.6	0.000287599	0.00797467	-0.601272	0.165812	5.99646	0.129854	0.00912333	0.0321173	0.0168751	0.0321173
USP15	ENST00000312635.10	0.000289886	0.00801792	-0.961569	0.265321	4.06823	0.204739	0.0300917	0.0111213	0.0755009	0.0755009
CCDC34	ENST00000529615.1	0.000290765	0.00802928	-1.31117	0.361864	3.68183	0.387918	0.0753756	-0.010432	0.121042	0.121042
PARPBP	ENST00000417507.6	0.000290782	0.00802928	-1.06207	0.293115	4.54388	0.308425	0.0498035	0.0790713	0.0441855	0.0790713
NONO	ENST00000471419.6	0.00029378	0.00809854	-0.588265	0.162472	5.59518	0.0906978	0.0183565	0.015766	0.0212391	0.0212391
PHTF1	ENST00000357783.6	0.00029373	0.00809854	-0.797885	0.220363	5.08753	0.143927	0.0439733	-0.0162314	0.0288668	0.0288668
MYBBP1A	ENST00000254718.8	0.000294002	0.00810127	-0.785618	0.21699	6.90976	0.15803	0.0587092	-0.00311182	0.0119177	0.0119177
SESTD1	ENST00000426988.1	0.000297256	0.00818071	-0.731529	0.202209	4.56249	0.172505	0.0179432	0.00945956	0.0433897	0.0433897
SERTAD4	ENST00000367012.4	0.000298997	0.00820814	-0.79166	0.218922	4.24107	0.267348	0.010467	0.023183	0.0614235	0.0614235
SERTAD4	ENST00000630425.2	0.000298997	0.00820814	-0.79166	0.218922	4.24107	0.267348	0.010467	0.023183	0.0614235	0.0614235
EHBP1L1	ENST00000309295.9	0.000306228	0.0083823	-0.591905	0.163964	5.02751	0.107218	0.0103253	-8.06853e-06	0.030001	0.030001
KDELR2	ENST00000490996.1	0.00030707	0.00840189	-3.48292	0.964995	3.04291	3.23518	1.13111	-0.279424	0.265714	0.265714
ENC1	ENST00000302351.8	0.000308326	0.00841848	-1.12449	0.311649	5.94059	0.347834	0.0759649	0.0697224	0.0173506	0.0697224
LRATD2	ENST00000517458.1	0.000308357	0.00841848	-0.81529	0.225956	4.5974	0.154511	0.0346146	-0.00390513	0.0419698	0.0419698
TBC1D7	ENST00000450347.5	0.000308788	0.00841994	-4.68825	1.29947	1.94447	4.45893	1.76631	-1.5744	0.766628	0.766628
CDK5RAP2	ENST00000480112.5	0.000315094	0.00855422	-5.38151	1.4938	2.95944	6.36869	3.05413	-2.49953	0.293033	0.293033
SAP30BP	ENST00000583536.5	0.000316326	0.00858264	-1.30212	0.361545	4.96131	0.426849	0.164713	-0.0222097	0.0313597	0.0313597
TANC1	ENST00000263635.8	0.000317147	0.00859937	-0.789853	0.21935	5.73495	0.204475	0.0044627	0.0677091	0.0194408	0.0677091
MTERF3	ENST00000287025.3	0.000319744	0.00865205	-0.60922	0.169286	5.82311	0.104261	0.00565476	0.0373321	0.0184725	0.0373321
ITM2B	ENST00000607866.1	0.000322168	0.00869276	-4.81117	1.33763	1.80249	5.86458	1.82318	0.18509	0.860693	0.860693
U2SURP	ENST00000463563.6	0.000324336	0.00873699	-0.658338	0.183124	7.06348	0.146124	0.00563552	0.0446659	0.011396	0.0446659
PARL	ENST00000418450.5	0.000324838	0.00874697	-3.21919	0.895551	2.67589	2.92457	0.575839	0.627179	0.394077	0.627179
GUF1	ENST00000506793.5	0.000332256	0.00888555	-5.34486	1.48933	2.70672	9.4207	2.78198	0.545201	0.382178	0.545201
SLF1	ENST00000265140.10	0.000332215	0.00888555	-0.724612	0.20191	5.92321	0.160622	0.00521299	0.0559383	0.0175057	0.0559383
TIPIN	ENST00000562124.5	0.000334455	0.00892961	-0.689434	0.192202	5.26977	0.130978	0.019945	0.0354671	0.0258447	0.0354671
MAP9	ENST00000650955.1	0.000338349	0.00901538	-0.652882	0.182165	6.00179	0.13489	0.0329447	0.0158944	0.0168314	0.0168314
TRA2B	ENST00000259043.11	0.000339134	0.00903266	-0.769621	0.214773	5.35483	0.254313	0.0275653	0.041626	0.0245832	0.041626
PIBF1	ENST00000326291.11	0.000339924	0.00905004	-0.599607	0.167357	5.74973	0.0994212	0.0041591	0.0378533	0.0192702	0.0378533
MLKL	ENST00000308807.12	0.00034025	0.00905347	-0.640526	0.17879	4.82375	0.107727	0.0133082	0.00488015	0.0346407	0.0346407
SLC7A14	ENST00000231706.6	0.00034062	0.00905765	-0.753366	0.210304	4.83635	0.162241	0.00814422	0.0581974	0.03431	0.0581974
PRKACB	ENST00000370685.7	0.00035156	0.00928716	-4.46104	1.24819	1.90821	7.09214	0.564988	1.77198	0.789943	1.77198
TIMM50	ENST00000602265.5	0.000354646	0.00934706	-0.630611	0.176557	5.53964	0.108478	0.0247588	0.0200063	0.0219997	0.0219997
BAX	ENST00000354470.7	0.000354861	0.00934706	-2.9836	0.835376	3.05753	2.61583	0.326063	0.720718	0.261087	0.720718
FDFT1	ENST00000647069.1	0.000354528	0.00934706	-0.627021	0.175547	7.66793	0.110498	0.000388331	0.0458369	0.0101032	0.0458369
FDFT1	ENST00000647178.1	0.000354528	0.00934706	-0.627021	0.175547	7.66793	0.110498	0.000388331	0.0458369	0.0101032	0.0458369
CRISPLD2	ENST00000262424.10	0.000357426	0.00939877	-0.664611	0.186183	5.15703	0.192094	0.00727557	0.0447204	0.0276494	0.0447204
MTAP	ENST00000419385.5	0.000361979	0.00947707	-4.78607	1.34201	3.56323	6.50725	0.759065	1.9424	0.139452	1.9424
ADD1	ENST00000511797.5	0.000365546	0.00956287	-3.37249	0.946322	2.21883	4.08001	0.736871	-0.380594	0.606416	0.606416
PPP1R12A	ENST00000546762.5	0.000373317	0.00971624	-0.740032	0.207976	5.22662	0.141997	0.0383664	-0.000794459	0.0265145	0.0265145
SLC2A14	ENST00000431042.6	0.000373927	0.00972449	-4.60728	1.29497	3.99601	7.52068	0.640554	1.87486	0.0824518	1.87486
ANK2	ENST00000506722.5	0.000383035	0.00992492	-5.00571	1.40946	2.014	7.02701	2.04684	0.933041	0.723309	0.933041
CTCF	ENST00000644753.1	0.000383952	0.00993441	-5.13722	1.44675	3.138	10.0638	2.24412	0.895503	0.23657	0.895503
BIRC3	ENST00000263464.8	0.000391415	0.0101077	-2.82333	0.796244	2.4036	2.27109	0.438293	-0.0263687	0.512714	0.512714
UBE2V2	ENST00000518360.5	0.000396358	0.0101996	-0.748202	0.211208	4.75956	0.120223	0.0304771	-0.0122132	0.0364359	0.0364359
EEF1A1	ENST00000488500.1	0.000406146	0.0103891	-0.585661	0.165625	10.1508	0.194411	0.00036146	0.0407861	0.0166489	0.0407861
HNRNPDL	ENST00000602300.5	0.000420222	0.0106798	-0.651429	0.184695	8.07242	0.277833	0.00121354	0.049955	0.00982634	0.049955
PIK3AP1	ENST00000339364.10	0.000421984	0.0107084	-0.732348	0.207703	4.62758	0.149042	0.0238967	0.040651	0.0408142	0.0408142
RECQL	ENST00000421138.6	0.000422401	0.0107114	-0.60371	0.171232	6.05267	0.123267	0.0166421	0.0273387	0.0164294	0.0273387
PRC1	ENST00000559828.1	0.000422994	0.0107182	-3.71695	1.05436	2.60046	3.90394	1.00457	0.662954	0.424511	0.662954
CRIP3	ENST00000451294.5	0.000423844	0.0107274	-3.77073	1.06978	1.42809	4.07861	0.531624	1.18502	1.14299	1.18502
ANKRD44	ENST00000647377.1	0.000427549	0.0107964	-3.05937	0.868531	2.9096	2.62281	0.299126	0.832392	0.309945	0.832392
TRDN	ENST00000361029.8	0.000428863	0.0108255	-0.671941	0.190803	5.71681	0.132224	0.00428796	0.0503206	0.0196554	0.0503206
NPIPB5	ENST00000536620.1	0.000430093	0.0108441	-0.841824	0.239094	4.1593	0.394018	0.0180951	0.0533899	0.0676538	0.0676538
SAR1A	ENST00000373238.5	0.000434852	0.0109432	-0.710027	0.201828	6.5298	0.149603	0.0148172	0.0462847	0.0135671	0.0462847
CLIC1	ENST00000375779.6	0.000437744	0.0109701	-1.04183	0.296294	4.92678	0.354549	0.0418053	0.0898797	0.0321201	0.0898797
CLIC1	ENST00000423804.5	0.000437744	0.0109701	-1.04183	0.296294	4.92678	0.354549	0.0418053	0.0898797	0.0321201	0.0898797
CLIC1	ENST00000438708.5	0.000437744	0.0109701	-1.04183	0.296294	4.92678	0.354549	0.0418053	0.0898797	0.0321201	0.0898797
CLIC1	ENST00000434202.5	0.000437744	0.0109701	-1.04183	0.296294	4.92678	0.354549	0.0418053	0.0898797	0.0321201	0.0898797
CLIC1	ENST00000423055.5	0.000437744	0.0109701	-1.04183	0.296294	4.92678	0.354549	0.0418053	0.0898797	0.0321201	0.0898797
CLIC1	ENST00000383404.6	0.000437744	0.0109701	-1.04183	0.296294	4.92678	0.354549	0.0418053	0.0898797	0.0321201	0.0898797
CLIC1	ENST00000423143.5	0.000437744	0.0109701	-1.04183	0.296294	4.92678	0.354549	0.0418053	0.0898797	0.0321201	0.0898797
C12orf75	ENST00000548336.1	0.000443717	0.0110862	-0.599911	0.170788	5.30453	0.137095	0.0184318	0.0064223	0.0253208	0.0253208
ENSA	ENST00000513281.5	0.000444753	0.0110995	-0.871945	0.248276	5.51095	0.227167	0.0389653	0.0534962	0.0223933	0.0534962
VSIR	ENST00000394957.8	0.000444706	0.0110995	-2.31968	0.660497	2.40133	1.22297	0.140585	0.114186	0.5138	0.5138
FGFR1OP2	ENST00000327214.5	0.000444621	0.0110995	-0.614899	0.175081	5.35426	0.0935389	0.0213889	-0.000499322	0.0245914	0.0245914
IGSF10	ENST00000282466.3	0.000447307	0.0111381	-0.824384	0.234835	4.83984	0.200002	0.0139038	0.0688177	0.0342196	0.0688177
PTPRB	ENST00000261266.9	0.000461629	0.0114173	-3.3851	0.966595	2.4819	3.49108	0.925326	0.401213	0.476132	0.476132
TNRC6A	ENST00000462400.1	0.000475115	0.011681	-3.93381	1.12574	1.45358	4.26159	0.778778	0.937624	1.12217	1.12217
RBM34	ENST00000474086.5	0.000478744	0.0117441	-0.601155	0.172134	5.35726	0.0893868	0.019897	0.0059492	0.024548	0.024548
NA	ENST00000293842.10	0.000478676	0.0117441	-0.6953	0.199089	5.30838	0.129616	0.0341909	0.0133358	0.0252635	0.0252635
PLAA	ENST00000523212.1	0.000481819	0.0117976	-4.96881	1.42346	2.12263	5.08735	2.38002	-2.07542	0.659317	0.659317
SHROOM4	ENST00000376020.6	0.000486267	0.0118845	-1.49121	0.4275	5.7083	0.495382	0.254376	-0.155248	0.019758	0.019758
SAP30BP	ENST00000542343.5	0.000491162	0.0119688	-0.724109	0.207747	5.23598	0.14042	0.038371	0.0170905	0.0263672	0.0263672
FERMT2	ENST00000343279.8	0.000491818	0.0119736	-1.02841	0.295082	6.68597	0.361455	0.0898306	0.0407797	0.01284	0.0407797
CD53	ENST00000271324.6	0.000492414	0.0119773	-3.41781	0.980762	1.82683	6.60907	0.5988	0.530961	0.84404	0.84404
AKAP7	ENST00000541650.5	0.000496169	0.0120326	-0.650076	0.186652	5.12074	0.0928565	0.0239853	-0.00583043	0.0282734	0.0282734
IFRD2	ENST00000426499.5	0.000498466	0.01208	-4.27395	1.22759	1.46638	4.53285	1.14866	0.328312	1.11181	1.11181
MACF1	ENST00000469490.1	0.000511697	0.0123329	-0.938118	0.269996	5.50748	0.284097	0.0164006	0.0929465	0.022441	0.0929465
TTN	ENST00000360870.9	0.000516044	0.0124151	-1.19857	0.345181	3.52414	0.291051	0.0327025	-0.00400231	0.146023	0.146023
PPHLN1	ENST00000449194.6	0.000519915	0.0124908	-0.698327	0.201231	6.40759	0.152793	0.00939701	0.0513437	0.0141849	0.0513437
RB1CC1	ENST00000435644.6	0.000519997	0.0124908	-0.649898	0.187278	7.12572	0.124416	0.0167984	0.0358109	0.0112089	0.0358109
ARHGAP45	ENST00000313093.6	0.000525632	0.0125959	-3.4938	1.00763	4.11509	4.59825	0.666332	0.85665	0.0713395	0.85665
IMPA1	ENST00000311489.8	0.000525652	0.0125959	-0.75816	0.218658	4.75037	0.177618	0.0350079	0.0301684	0.0367091	0.0367091
CTNNA3	ENST00000433211.7	0.000528665	0.0126406	-1.18677	0.342423	3.56632	0.300107	0.036935	0.00909063	0.138945	0.138945
ZNF275	ENST00000370251.3	0.000529324	0.0126518	-5.35958	1.54657	2.30564	6.7544	3.02667	-1.50511	0.56115	0.56115
CCDC141	ENST00000343876.6	0.000536062	0.0127713	-2.03497	0.587793	4.02381	1.39628	0.228376	0.289874	0.0796975	0.289874
HLA-DQA1	ENST00000474698.5	0.000538603	0.0128087	-0.619617	0.179039	4.81526	0.174566	0.0132155	0.00859752	0.0348672	0.0348672
BIRC6	ENST00000648282.1	0.000540665	0.0128532	-0.655791	0.189548	6.43371	0.152397	0.0167041	0.0371888	0.0140481	0.0371888
SP100	ENST00000340126.9	0.000545557	0.0129323	-1.21867	0.352488	3.55664	0.512195	0.0458313	-0.011213	0.14054	0.14054
CNIH1	ENST00000395573.8	0.000550434	0.0130153	-0.727724	0.210634	4.93852	0.144053	0.0346925	-0.00644147	0.0318572	0.0318572
KPNA4	ENST00000483437.1	0.00055005	0.0130153	-0.825544	0.238934	4.48537	0.151038	0.0387622	-0.0123362	0.0468717	0.0468717
TRIM49B	ENST00000622138.4	0.000550906	0.0130218	-3.32521	0.962518	1.56426	2.988	0.355095	-0.196703	1.03457	1.03457
FZD5	ENST00000295417.4	0.000553203	0.0130574	-0.642858	0.186143	8.55576	0.120692	0.000195682	0.0517779	0.0100712	0.0517779
PLOD2	ENST00000494950.5	0.000552974	0.0130574	-0.651703	0.188698	5.98375	0.12834	0.0245886	0.0288215	0.0169803	0.0288215
CCDC88A	ENST00000263630.13	0.000554075	0.0130733	-4.89131	1.41648	2.47923	7.42744	2.53226	0.299212	0.477346	0.477346
LEFTY1	ENST00000272134.5	0.000554429	0.013077	-1.73892	0.503599	6.45443	1.2794	0.00297436	0.377443	0.0139416	0.377443
AHNAK2	ENST00000333244.6	0.000558507	0.0131498	-1.03633	0.300298	4.37076	0.315533	0.063188	0.0720802	0.0529896	0.0720802
EIF4H	ENST00000495187.1	0.00056634	0.0132937	-4.37019	1.26773	1.39485	4.43323	1.24022	-0.132171	1.1705	1.1705
S1PR5	ENST00000617721.1	0.000567719	0.0133145	-3.13541	0.909715	2.95157	2.68951	0.945694	0.0987675	0.295678	0.295678
TFPI2	ENST00000650573.1	0.000569934	0.0133493	-0.624616	0.181283	5.0734	0.102983	0.0201689	0.00999027	0.0291262	0.0291262
RFPL4B	ENST00000441065.3	0.000572239	0.0133826	-2.70333	0.784838	2.09285	2.6711	0.247545	0.514379	0.67641	0.67641
EMB	ENST00000506190.1	0.000580675	0.0135463	-0.729209	0.211949	4.83672	0.183273	0.0330833	0.0197355	0.0343005	0.0343005
FECH	ENST00000651787.1	0.000586869	0.0136668	-4.74219	1.3795	4.01333	5.33595	2.77381	-1.37011	0.0807234	0.0807234
ZFAND6	ENST00000558494.5	0.000589217	0.0137156	-4.06085	1.18167	3.32831	6.28266	1.47086	0.623671	0.186041	0.623671
GABRG2	ENST00000638782.1	0.000590098	0.0137262	-0.789554	0.22978	4.34826	0.161872	0.0248658	0.0191016	0.0543326	0.0543326
SMC2	ENST00000374787.7	0.000601414	0.0139222	-0.703518	0.205049	6.64618	0.168894	0.00843048	0.0546371	0.0130204	0.0546371
BLMH	ENST00000578090.5	0.000604821	0.0139668	-4.98218	1.45277	1.78334	5.83372	2.29186	-0.719747	0.873937	0.873937
B2M	ENST00000623550.1	0.000605204	0.0139708	-2.46187	0.7179	3.25677	2.0775	0.569343	-0.279102	0.203727	0.203727
UNC5D	ENST00000287272.6	0.000605455	0.0139717	-0.690019	0.201221	6.97267	0.302258	0.0182743	0.0424606	0.0116937	0.0424606
MUC19	ENST00000454784.9	0.00060885	0.0140403	-1.43098	0.417481	3.21658	0.445135	0.0470707	0.00251408	0.214365	0.214365
FAT2	ENST00000261800.5	0.000614125	0.0141274	-1.08629	0.317137	3.72582	0.295626	0.0360953	0.0627935	0.114768	0.114768
IKBIP	ENST00000299157.5	0.00061844	0.0141823	-0.757327	0.221221	5.35625	0.176435	0.00531077	0.0680973	0.0245626	0.0680973
PSMD12	ENST00000357146.4	0.00061815	0.0141823	-0.980375	0.286364	5.44131	0.33946	0.0485206	0.0744863	0.0233567	0.0744863
SPATS2L	ENST00000409397.6	0.000618191	0.0141823	-0.746282	0.217988	5.81011	0.157939	0.0136096	0.0576683	0.018608	0.0576683
TPM4	ENST00000642789.1	0.00062006	0.0142096	-3.99864	1.16827	1.55899	4.67724	1.00708	1.04022	1.03864	1.04022
BAX	ENST00000513545.5	0.000627182	0.0143579	-0.789034	0.23074	5.51681	0.191053	0.0575488	0.00645335	0.0223128	0.0223128
DNAJB14	ENST00000471101.5	0.000635599	0.0144954	-3.81895	1.11798	1.42202	4.04781	0.726827	0.897223	1.14798	1.14798
USH2A	ENST00000307340.8	0.000636774	0.0145122	-1.1739	0.343704	3.55093	0.419134	0.031763	0.145436	0.141488	0.145436
DBT	ENST00000370131.3	0.000639162	0.0145566	-0.623918	0.18273	5.06052	0.111183	0.0167219	0.0333634	0.0293666	0.0333634
KRR1	ENST00000438169.6	0.000642188	0.0146104	-0.606484	0.177691	5.68324	0.134723	0.00723183	0.0401293	0.0200673	0.0401293
ACLY	ENST00000590151.5	0.0006521	0.0147902	-2.01741	0.591795	6.90368	1.04952	0.513392	-0.237784	0.0119402	0.0119402
SMAD4	ENST00000589941.1	0.000660259	0.0149292	-3.86757	1.13566	2.18256	3.57853	1.30863	-0.277482	0.625959	0.625959
ASNSP1	ENST00000641735.1	0.000661154	0.0149443	-2.5563	0.750705	2.64178	2.39363	0.251454	0.593883	0.40761	0.593883
PAFAH1B1	ENST00000576586.5	0.000666338	0.0150255	-1.3573	0.398845	4.09039	0.490946	0.165117	-0.0173928	0.0734992	0.0734992
TFCP2	ENST00000548115.5	0.000668709	0.0150585	-1.02576	0.301509	4.51118	0.327018	0.0907095	-0.0431024	0.045652	0.045652
VPS13A	ENST00000376636.7	0.000674298	0.015153	-0.901348	0.265116	6.04483	0.266164	0.0366524	0.0687776	0.0164897	0.0687776
RNPC3	ENST00000524631.5	0.000674925	0.0151572	-3.7173	1.09346	2.06445	3.39435	1.10046	-0.830178	0.693027	0.693027
RASSF9	ENST00000361228.5	0.000676616	0.0151694	-0.880491	0.259053	4.01019	0.286218	0.0196287	0.0768382	0.081034	0.081034
ADCY2	ENST00000489501.1	0.000676572	0.0151694	-0.727476	0.214033	4.39024	0.163393	0.0168495	0.0210578	0.0518656	0.0518656
FGF4	ENST00000168712.3	0.000678041	0.0151962	-0.673092	0.198067	5.51063	0.291711	0.00475305	0.0540926	0.0223977	0.0540926
RHOT1	ENST00000578205.5	0.000679348	0.0152203	-4.48549	1.32012	2.64385	5.8972	2.20731	0.114069	0.406774	0.406774
CACNA1A	ENST00000360228.10	0.000680644	0.0152442	-4.87149	1.43395	3.24564	6.273	2.87768	-2.56937	0.206623	0.206623
STX18	ENST00000512195.5	0.000687703	0.0153555	-4.11228	1.21148	1.77663	3.81847	1.3229	-0.9726	0.878615	0.878615
GTF2H1	ENST00000534641.5	0.000690166	0.0153949	-4.42991	1.30543	3.18095	5.48379	2.33201	-0.739831	0.224209	0.224209
SEMA6A	ENST00000257414.12	0.000692449	0.0154354	-0.629178	0.185459	8.76881	0.273726	0.00084043	0.0507519	0.0103864	0.0507519
MDM2	ENST00000544125.1	0.000694275	0.0154709	-2.11804	0.624454	3.75788	1.28821	0.445983	0.138931	0.110381	0.138931
LINC00869	ENST00000429388.5	0.00069508	0.0154779	-3.81375	1.1245	1.85065	4.29678	0.370567	1.52618	0.827953	1.52618
TNFRSF11B	ENST00000297350.9	0.000696687	0.0154988	-0.956268	0.282012	3.97526	0.379403	0.0347225	0.0668239	0.0845735	0.0845735
KLF5	ENST00000539231.5	0.000699011	0.0155294	-3.77579	1.11381	2.72323	4.24679	1.48494	-0.462226	0.375936	0.375936
CCDC58	ENST00000479414.1	0.00069901	0.0155294	-0.784335	0.231369	5.01949	0.178088	0.0306702	0.0496275	0.0301593	0.0496275
RUNX3	ENST00000308873.10	0.000698821	0.0155294	-1.88234	0.555255	3.03408	0.964703	0.193926	-0.0965537	0.268536	0.268536
PUF60	ENST00000620953.2	0.000702836	0.0155987	-4.82653	1.4244	3.51776	5.48536	2.89623	-1.54929	0.147133	0.147133
NUDCD1	ENST00000427660.6	0.00070926	0.0157096	-0.622545	0.18386	6.50117	0.117205	0.00829649	0.0424103	0.0137071	0.0424103
FOSL1	ENST00000312562.6	0.000712648	0.0157636	-1.12742	0.333095	4.47437	0.453214	0.0854996	0.0809289	0.0474086	0.0809289
ITGB5	ENST00000460797.5	0.000724388	0.0159912	-1.20002	0.355016	4.05394	0.589603	0.11223	0.00806493	0.0768237	0.0768237
DYNLT3	ENST00000378578.9	0.000732067	0.0160962	-0.703283	0.20824	4.39799	0.105098	0.0136169	-0.0115827	0.0514288	0.0514288
PPM1A	ENST00000528241.2	0.000733693	0.0161159	-3.15653	0.934805	1.72906	2.58207	0.3986	0.311183	0.912189	0.912189
BTN3A2	ENST00000604202.1	0.000736606	0.0161584	-0.741682	0.21972	4.29108	0.156253	0.0144461	0.0462786	0.0579691	0.0579691
DLG2	ENST00000426717.6	0.000739321	0.0161957	-0.948253	0.281	5.44953	0.334812	0.0171741	0.101267	0.0232422	0.101267
TPTEP1	ENST00000588424.1	0.0007393	0.0161957	-0.68774	0.203801	4.4264	0.152378	0.0124296	0.0112755	0.0498724	0.0498724
METTL8	ENST00000438609.5	0.000754848	0.0164712	-1.16981	0.347244	4.35982	0.389002	0.127231	0.00309308	0.0536367	0.0536367
CCDC141	ENST00000409284.1	0.000756343	0.0164768	-2.38866	0.709161	2.4975	1.87034	0.117189	0.637175	0.469081	0.637175
LMO3	ENST00000447609.5	0.000760503	0.0165428	-4.8122	1.42932	1.75939	5.72462	2.17372	-0.336678	0.89069	0.89069
MAD2L1	ENST00000333047.9	0.000760568	0.0165428	-0.7553	0.22434	5.80638	0.174284	0.0185196	0.0569734	0.0186473	0.0569734
USP48	ENST00000421625.6	0.000766159	0.0166467	-0.630969	0.187524	4.83359	0.111454	0.0183659	-0.00430013	0.0343819	0.0343819
IGSF1	ENST00000370903.8	0.000769061	0.0166987	-4.83585	1.43766	1.76965	5.82751	2.2168	-0.299178	0.883493	0.883493
CHST9	ENST00000581714.5	0.00078609	0.0169804	-1.68887	0.502993	4.61803	0.879727	0.266023	0.11348	0.041173	0.11348
CXXC5	ENST00000511048.1	0.000790035	0.0170367	-0.86834	0.258722	5.37135	0.218315	0.0665842	0.0338216	0.0243453	0.0338216
USP4	ENST00000265560.8	0.000793239	0.0170613	-0.661674	0.197212	5.68227	0.128848	0.0175092	0.0408295	0.0200795	0.0408295
SSB	ENST00000409333.1	0.000797668	0.0171177	-1.166	0.347687	4.58109	0.393161	0.121927	0.0594018	0.0426219	0.0594018
B2M	ENST00000617605.4	0.000798073	0.0171208	-3.83967	1.14499	1.34372	3.97651	0.752849	0.822306	1.21364	1.21364
POLR1B	ENST00000417433.6	0.000820576	0.0175183	-0.698398	0.208741	6.65627	0.140702	0.0175847	0.0477747	0.0129744	0.0477747
NUCKS1	ENST00000464938.1	0.000822394	0.0175402	-1.93646	0.578886	4.05819	0.835755	0.426236	-0.321128	0.0764281	0.0764281
PACSIN1	ENST00000374043.6	0.000827844	0.017645	-5.53541	1.65567	2.59901	6.66716	3.68673	-2.87388	0.425117	0.425117
XRCC5	ENST00000460284.5	0.000845903	0.0179432	-0.944896	0.28313	4.72334	0.267163	0.0827058	0.0193047	0.0375382	0.0375382
KIN	ENST00000463666.5	0.000858273	0.0181301	-0.763896	0.229172	4.41006	0.172899	0.0261192	0.0526605	0.0507583	0.0526605
IKZF3	ENST00000346872.8	0.00086168	0.0181788	-1.07635	0.323018	3.65177	0.342319	0.0310095	0.0654094	0.125501	0.125501
GOLGA6D	ENST00000618219.5	0.000866952	0.0182609	-1.44551	0.434023	4.00901	0.92914	0.0917287	0.190835	0.0811514	0.190835
DTL	ENST00000542077.5	0.000874739	0.0183898	-3.73755	1.12306	2.59081	3.82588	1.46337	-0.34522	0.42854	0.42854
IQSEC2	ENST00000640694.1	0.000890811	0.0186802	-1.30952	0.394089	6.70814	0.502969	0.0449322	0.188026	0.0127405	0.188026
IL1RAP	ENST00000422485.5	0.000904102	0.018899	-3.91663	1.18014	1.83773	3.58777	1.25244	-0.72534	0.836657	0.836657
COL23A1	ENST00000407622.2	0.000907647	0.0189552	-0.664777	0.200373	5.18386	0.1811	0.0330213	0.0112439	0.0272029	0.0272029
CDCA7	ENST00000410019.3	0.000910424	0.0189933	-0.633415	0.19097	5.66968	0.121712	0.0344648	0.0201777	0.0202393	0.0202393
SLC50A1	ENST00000368405.7	0.000943145	0.0195484	-0.971483	0.293769	4.35291	0.210833	0.0753992	-0.0320344	0.0540514	0.0540514
TOMM7	ENST00000405021.7	0.000946363	0.019595	-0.923805	0.279432	4.22325	0.212821	0.0544059	0.00136738	0.0627179	0.0627179
SKA2	ENST00000581068.5	0.000962292	0.0198334	-0.668333	0.202444	4.72808	0.141524	0.0240854	-0.00824041	0.0373899	0.0373899
ATP5F1B	ENST00000552959.5	0.000964856	0.0198739	-4.33055	1.31206	1.60032	5.14312	1.57527	0.544518	1.00697	1.00697
MTRF1	ENST00000379477.5	0.000972024	0.0199718	-0.828749	0.25125	4.64043	0.190012	0.0543488	-0.0314499	0.0403412	0.0403412
B2M	ENST00000559220.1	0.000977913	0.0200741	-3.29388	0.999112	4.07249	10.2898	1.20607	0.29127	0.0751112	0.29127
USP16	ENST00000399975.7	0.000980152	0.0201138	-0.67131	0.203664	5.75439	0.13334	0.0430016	0.0116741	0.019217	0.019217
RPL22L1	ENST00000295830.13	0.000987457	0.0202261	-0.836908	0.254064	6.33075	0.233946	0.00266646	0.0941567	0.014605	0.0941567
SRRM2	ENST00000576674.1	0.000991212	0.0202778	-4.57134	1.3882	2.02606	6.63718	1.41923	1.4714	0.715978	1.4714
SLC7A8	ENST00000525062.1	0.000994999	0.0203302	-1.60353	0.487107	4.23207	0.878854	0.274631	0.0812798	0.062073	0.0812798
NAT2	ENST00000286479.4	0.000995583	0.0203358	-2.01036	0.610723	2.87588	1.53932	0.136392	0.423081	0.321575	0.423081
CISD1	ENST00000489785.5	0.000999609	0.0203992	-0.625629	0.190124	4.95512	0.0993825	0.0227274	-0.00023268	0.0314933	0.0314933
LIPA	ENST00000336233.10	0.00100322	0.020454	-0.808484	0.245768	7.83221	0.220984	0.000703374	0.0898995	0.00993743	0.0898995
TAF11L11	ENST00000510838.2	0.00103754	0.0210113	-2.34118	0.713744	2.38345	2.47065	0.0909557	0.67319	0.522438	0.67319
PKHD1L1	ENST00000526472.1	0.0010432	0.0211193	-1.73442	0.52901	3.25154	0.974781	0.124246	0.295531	0.205083	0.295531
HCST	ENST00000437550.2	0.00106137	0.0214065	-2.37757	0.726256	2.53971	1.36287	0.340785	-0.00546739	0.450387	0.450387
PUF60	ENST00000456095.6	0.0010626	0.0214204	-4.10316	1.25348	2.5846	4.6969	1.92568	0.122923	0.43115	0.43115
ACTG1	ENST00000615544.4	0.00106679	0.0214791	-0.770781	0.235548	7.26304	0.242919	0.00679769	0.0764265	0.0108425	0.0764265
BZW1	ENST00000409226.5	0.00107813	0.0216609	-0.86244	0.263799	7.82718	0.256968	0.000999631	0.103386	0.00994141	0.103386
METTL21A	ENST00000448823.2	0.00107847	0.0216611	-3.2848	1.00477	2.9029	3.15891	0.829221	0.685116	0.312246	0.685116
NT5C3B	ENST00000476921.5	0.00108875	0.0217947	-3.63911	1.11406	2.34424	3.53678	1.31998	-0.0175959	0.54172	0.54172
CRLF1	ENST00000392386.8	0.00109831	0.0219331	-1.14028	0.349345	5.28314	0.695815	0.00918772	0.173875	0.0256417	0.173875
FAM189A2	ENST00000645123.1	0.00109823	0.0219331	-0.851423	0.260847	4.18016	0.212643	0.0163678	0.0856937	0.0659933	0.0856937
TSTA3	ENST00000529048.5	0.0010998	0.0219363	-4.24123	1.29953	1.29975	4.00523	1.2816	-0.48725	1.25157	1.25157
TSTA3	ENST00000633165.1	0.0010998	0.0219363	-4.24123	1.29953	1.29975	4.00523	1.2816	-0.48725	1.25157	1.25157
CDH6	ENST00000265071.3	0.00110072	0.021948	-1.00406	0.307671	3.77275	0.212989	0.0335935	-0.00670801	0.108398	0.108398
MSH2	ENST00000644092.1	0.00110162	0.0219572	-1.33843	0.410158	3.47958	0.44649	0.098293	-0.0385043	0.154052	0.154052
DDX23	ENST00000552369.5	0.00111072	0.0220942	-3.71805	1.1402	2.1919	3.97016	1.32921	0.506193	0.620883	0.620883
BBS9	ENST00000434373.3	0.00113386	0.0224667	-0.84913	0.260868	5.58134	0.271053	0.010978	0.0911004	0.0214287	0.0911004
ITPR2	ENST00000381340.8	0.00114641	0.0226273	-0.83231	0.255947	7.99106	0.204984	0.000554838	0.0977083	0.00984671	0.0977083
CYP1B1	ENST00000610745.5	0.00115579	0.0227512	-1.56956	0.483004	4.09297	0.838707	0.0430241	0.306915	0.0732702	0.306915
CDKN1A	ENST00000244741.9	0.00116027	0.0228056	-1.73474	0.534019	5.60279	0.889283	0.154608	0.273156	0.021135	0.273156
C14orf119	ENST00000319074.6	0.00116607	0.0228991	-0.648093	0.199594	6.5232	0.142764	0.00213564	0.0576211	0.0135991	0.0576211
CD44	ENST00000415148.6	0.00116971	0.0229571	-4.10902	1.26581	1.82977	3.82324	1.56136	-1.34292	0.842048	0.842048
UQCRC1	ENST00000472438.5	0.0011707	0.0229696	-4.49922	1.38611	1.89436	6.25016	2.08299	0.124688	0.798978	0.798978
SBNO1	ENST00000602398.3	0.00117675	0.0230746	-0.628127	0.1936	7.39715	0.0956008	0.0456783	-0.0182432	0.0105432	0.0105432
BAG1	ENST00000379704.7	0.00118196	0.0231496	-1.15609	0.356465	5.66356	0.40947	0.0208064	0.169795	0.0203181	0.169795
IAH1	ENST00000497473.5	0.00118434	0.0231755	-3.14645	0.97034	2.17003	2.94363	0.779521	0.415694	0.632819	0.632819
CERT1	ENST00000644445.1	0.00120118	0.0234493	-0.803408	0.248073	5.73324	0.214469	0.0728491	0.0138204	0.0194609	0.0194609
ABCC1	ENST00000622828.3	0.0012036	0.0234784	-4.62493	1.42832	1.79151	5.6832	2.19187	-0.0507138	0.868275	0.868275
SRSF7	ENST00000425941.6	0.00122748	0.0238223	-4.82225	1.49184	1.88875	6.17373	2.53572	-0.205087	0.802654	0.802654
HMGCR	ENST00000343975.9	0.00122743	0.0238223	-0.716725	0.221729	6.77471	0.163515	0.0172229	0.0565231	0.0124506	0.0565231
NA	ENST00000433797.5	0.00123755	0.0239685	-0.897804	0.277951	6.38644	0.253988	0.0410039	0.0748811	0.0142978	0.0748811
ARHGAP17	ENST00000303665.9	0.00124345	0.0240685	-1.86383	0.577265	4.68444	0.702831	0.46105	-0.410842	0.0388019	0.0388019
C7orf57	ENST00000348904.4	0.0012438	0.0240685	-3.67616	1.13861	2.06497	4.60933	1.25193	-1.02411	0.692719	0.692719
DENND2D	ENST00000357640.9	0.00124729	0.0241078	-3.14441	0.974153	1.76255	3.04459	0.333874	1.08959	0.888466	1.08959
HJURP	ENST00000414924.5	0.00126076	0.0243183	-0.810347	0.251288	5.89308	0.199863	0.0240501	0.0706688	0.0177833	0.0706688
TPP2	ENST00000651748.1	0.00127597	0.0245802	-1.12678	0.349786	5.70871	0.293784	0.163772	-0.126389	0.0197529	0.0197529
RAPGEF2	ENST00000505478.5	0.00129239	0.0248344	-0.812501	0.252513	4.59287	0.195797	0.0207983	0.0748458	0.0421489	0.0748458
EIF3J	ENST00000558053.1	0.00129628	0.0248729	-1.03375	0.321359	4.48415	0.35002	0.107977	0.0119776	0.0469305	0.0469305
CNIH3	ENST00000272133.4	0.00129668	0.0248733	-0.84951	0.264092	5.03167	0.366219	0.00797511	0.0966421	0.0299195	0.0966421
FBXO22	ENST00000569054.5	0.00130444	0.0249717	-0.834866	0.259678	4.55098	0.162049	0.0572707	-0.0169219	0.0438785	0.0438785
NEPRO	ENST00000489848.5	0.00131383	0.0251149	-4.45098	1.38533	1.71319	5.29648	1.95514	0.0558993	0.923567	0.923567
TRIM9	ENST00000298355.7	0.00131637	0.0251308	-0.905551	0.281893	4.96729	0.266847	0.00843933	0.110757	0.0312318	0.110757
GALNT1	ENST00000591924.5	0.00131656	0.0251308	-1.36596	0.425221	3.66585	0.4414	0.147824	-0.0369031	0.123395	0.123395
THOC2	ENST00000355725.8	0.00131587	0.0251308	-1.21956	0.37963	6.10584	0.402004	0.200143	-0.107005	0.0160351	0.0160351
RASGRF2	ENST00000503795.1	0.00131743	0.0251329	-0.882981	0.274887	5.0544	0.244964	0.0838624	-0.00986717	0.0294822	0.0294822
CLEC2D	ENST00000290855.11	0.00131865	0.0251489	-0.70023	0.218012	4.42271	0.214627	0.0212234	0.0440015	0.0500703	0.0500703
HAS2	ENST00000303924.5	0.00132251	0.0252053	-1.14759	0.357389	5.28143	0.421942	0.00549523	0.186095	0.0256676	0.186095
SRPK2	ENST00000357311.7	0.0013345	0.0253562	-3.75771	1.17119	2.48137	3.91806	1.58116	0.0589469	0.476372	0.476372
ATG4C	ENST00000371120.7	0.00133662	0.0253819	-0.697615	0.217461	5.37041	0.111327	0.0465752	-0.0198672	0.0243587	0.0243587
MCM3	ENST00000421471.1	0.00133808	0.0253973	-0.617706	0.192571	5.51475	0.122883	0.0206464	0.0349788	0.0223411	0.0349788
STT3B	ENST00000488151.1	0.00133993	0.0254083	-0.596677	0.186038	4.99409	0.107503	0.0212436	-0.00443015	0.0306715	0.0306715
NHSL2	ENST00000631375.1	0.00134451	0.0254733	-0.656107	0.20463	6.10219	0.132747	0.0126512	0.0501591	0.0160614	0.0501591
RPS3AP26	ENST00000398259.2	0.00134841	0.0255179	-1.79677	0.560533	3.53662	1.57502	0.117467	0.353828	0.143887	0.353828
ILF3	ENST00000590869.1	0.00135532	0.0256195	-0.626951	0.195678	5.16183	0.152218	0.0226709	0.0347637	0.0275687	0.0347637
XAF1	ENST00000361842.8	0.00136011	0.0256834	-1.1054	0.345115	3.7416	0.32521	0.0660679	0.0199819	0.112589	0.112589
APPL2	ENST00000539978.6	0.00136396	0.0257239	-4.03641	1.26052	1.51774	4.58757	1.31254	0.61969	1.07084	1.07084
TRIM49	ENST00000329758.5	0.00137223	0.0258652	-3.08806	0.964889	2.50064	2.54576	0.928847	0.0464071	0.467669	0.467669
CYP4F22	ENST00000269703.8	0.00138558	0.0260351	-1.28746	0.40263	4.28411	0.504413	0.184731	-0.138875	0.0584354	0.0584354
CHD8	ENST00000645140.1	0.00138946	0.0260815	-2.94825	0.922241	2.40195	3.2804	0.724848	0.550945	0.513504	0.550945
RBM3	ENST00000489344.5	0.00139673	0.0261778	-1.35915	0.425356	5.17965	0.91611	0.24412	-0.107259	0.0272722	0.0272722
UGP2	ENST00000467648.6	0.0014152	0.0265015	-4.80287	1.50488	2.01527	6.60491	2.67446	0.0866835	0.722533	0.722533
PRR29	ENST00000225760.5	0.00141585	0.0265062	-3.46941	1.08711	1.27604	3.51818	0.500385	1.01638	1.27234	1.27234
LRBA	ENST00000651695.1	0.0014288	0.0267107	-0.5981	0.187564	6.83503	0.157699	0.0201651	0.0326055	0.0122036	0.0326055
RPGR	ENST00000642395.1	0.00143334	0.0267806	-4.75488	1.49156	2.42877	6.59358	2.83639	0.280108	0.50074	0.50074
DNAJB4	ENST00000370763.6	0.00143591	0.0268133	-0.745732	0.233967	4.30267	0.155366	0.0249054	0.0336737	0.0572057	0.0572057
AADACL3	ENST00000359318.8	0.00144218	0.0268962	-1.29515	0.406504	4.60444	0.618238	0.176606	0.071262	0.0416945	0.071262
CFAP69	ENST00000475031.5	0.0014438	0.0269075	-0.786041	0.246737	4.17286	0.204567	0.0247499	0.00979999	0.0665686	0.0665686
NA	ENST00000640289.1	0.00144445	0.0269122	-0.591822	0.185779	6.25679	0.126011	0.0113128	0.0404582	0.0150386	0.0404582
DLG3	ENST00000374360.8	0.00145897	0.027129	-3.94804	1.24046	1.87286	4.09076	1.49496	-0.98872	0.813142	0.813142
PSMC3	ENST00000531653.5	0.00145972	0.0271292	-5.06807	1.59244	2.81258	7.90423	1.38166	2.42215	0.343672	2.42215
DHCR7	ENST00000527316.5	0.0014658	0.0272179	-1.08988	0.342582	4.86443	0.267483	0.142447	-0.089723	0.0335967	0.0335967
CNOT3	ENST00000644245.1	0.0014834	0.0274907	-0.863733	0.271793	4.45945	0.232432	0.0503176	0.0604892	0.0481536	0.0604892
NT5C2	ENST00000452156.5	0.00149123	0.0276126	-0.871498	0.274368	4.87293	0.232194	0.0299293	0.0829874	0.0333871	0.0829874
HLA-C	ENST00000376228.9	0.00149766	0.0277006	-3.55315	1.11905	1.27306	4.18596	0.603456	0.855724	1.27496	1.27496
ZNF826P	ENST00000622273.1	0.00154164	0.0283398	-1.09626	0.346179	4.94578	0.552275	0.143163	0.0365971	0.0316971	0.0365971
PPFIBP2	ENST00000299492.9	0.0015531	0.02851	-0.810952	0.256259	5.36249	0.225103	0.0441863	0.0543169	0.0244725	0.0543169
SLC25A3P1	ENST00000566100.1	0.0015564	0.0285476	-1.11049	0.350983	3.57725	0.43871	0.0408703	0.143913	0.137162	0.143913
PRKD3	ENST00000443187.1	0.00156742	0.02871	-0.690859	0.218495	4.66208	0.147925	0.030088	0.041522	0.0395687	0.041522
SND1	ENST00000492772.1	0.00158334	0.0289135	-4.70699	1.49004	2.09629	7.65963	1.49041	1.83994	0.674419	1.83994
RBIS	ENST00000612809.4	0.00160109	0.0291732	-0.637717	0.202084	5.18824	0.164498	0.0125671	0.0486895	0.0271311	0.0486895
AL356052.1	ENST00000605764.1	0.00160617	0.029223	-2.03589	0.645335	2.4661	1.44998	0.141329	0.433406	0.483357	0.483357
KIAA1671	ENST00000637069.1	0.0016138	0.0293161	-0.611521	0.193924	6.05685	0.167061	0.0237952	0.0326148	0.0163975	0.0326148
HPRT1	ENST00000475720.1	0.00161586	0.0293372	-0.617682	0.195901	4.89646	0.116383	0.0247452	0.0012259	0.0328207	0.0328207
NUP93	ENST00000564278.1	0.00163729	0.0296438	-0.594103	0.188653	5.3127	0.133645	0.0281856	0.00652905	0.0251994	0.0251994
PAXBP1	ENST00000497873.1	0.00164813	0.0298005	-1.28975	0.409803	3.47843	0.382179	0.0976413	-0.00412135	0.154266	0.154266
CD27	ENST00000266557.3	0.00165745	0.0298955	-3.69265	1.17391	1.46394	4.79263	0.197106	1.86998	1.11378	1.86998
PNN	ENST00000554902.5	0.00166131	0.029957	-3.8487	1.22378	1.68459	5.88229	0.972079	1.27438	0.944287	1.27438
JAKMIP2	ENST00000265272.9	0.00170104	0.0305734	-0.706088	0.225012	5.38007	0.160538	0.00974334	0.0662022	0.0242205	0.0662022
ANKRD13B	ENST00000614878.4	0.00171024	0.0306866	-3.3328	1.06261	3.05505	3.53465	1.43185	-0.0372753	0.261868	0.261868
SYNCRIP	ENST00000444272.1	0.00173625	0.0310273	-0.880432	0.281109	5.64962	0.338306	0.0217458	0.0967878	0.0205	0.0967878
ISYNA1	ENST00000578352.5	0.00177933	0.0315859	-2.85463	0.913545	2.17641	2.92954	0.622525	0.192515	0.629321	0.629321
C14orf39	ENST00000321731.8	0.00179523	0.0318168	-1.8238	0.584145	3.0206	1.30295	0.238965	0.196834	0.272873	0.272873
CEP350	ENST00000496440.1	0.00181866	0.0321374	-3.24855	1.04175	2.29966	2.7841	1.06367	-0.14573	0.5642	0.5642
MRPS28	ENST00000519120.1	0.00183459	0.0323188	-0.90453	0.290306	4.30034	0.275048	0.0690587	0.0069397	0.0573579	0.0573579
KANK2	ENST00000588787.5	0.00183612	0.0323337	-0.613106	0.19679	5.48873	0.115868	0.0353902	0.0151415	0.0226992	0.0226992
PTPN2	ENST00000591497.5	0.00185431	0.0325761	-3.07499	0.987908	2.48124	3.57169	0.987511	0.455695	0.476433	0.476433
RPS10-NUDT3	ENST00000639877.1	0.0018663	0.0327258	-0.850605	0.273443	5.8959	0.220203	0.015582	0.0965744	0.0177568	0.0965744
KIAA1841	ENST00000402291.5	0.00188678	0.0330236	-0.613804	0.197523	5.11917	0.098504	0.0302223	0.00157081	0.028301	0.028301
NABP1	ENST00000410026.6	0.00189306	0.0330898	-0.741079	0.238556	4.17577	0.125384	0.0190252	0.00940773	0.0663384	0.0663384
RUSC1	ENST00000368354.7	0.00192049	0.0334984	-4.17125	1.34458	2.77481	6.41018	2.35484	-1.0722	0.357012	0.357012
NRP1	ENST00000374816.7	0.00193971	0.0337803	-0.802857	0.259044	4.20057	0.206145	0.0362393	0.0375227	0.0644161	0.0644161
TRIM64	ENST00000533122.3	0.00194036	0.0337826	-2.66322	0.85932	2.02259	1.88933	0.389564	-0.265005	0.718083	0.718083
CHCHD2	ENST00000395422.4	0.00194745	0.0338706	-3.6418	1.17548	3.08669	4.04133	0.126026	1.94662	0.252008	1.94662
GMPR2	ENST00000456667.7	0.00196247	0.0340907	-3.8768	1.25225	1.34867	4.0412	1.14279	0.455999	1.20942	1.20942
GMPR2	ENST00000643803.1	0.00196247	0.0340907	-3.8768	1.25225	1.34867	4.0412	1.14279	0.455999	1.20942	1.20942
EGFL8	ENST00000466239.5	0.00198739	0.0344113	-3.83689	1.24086	2.00257	4.3225	1.57931	-1.30885	0.730304	0.730304
GDF15	ENST00000252809.3	0.0019887	0.0344241	-1.41634	0.458079	4.33259	0.904263	0.0247062	0.290048	0.0552971	0.290048
CCNA1	ENST00000625767.1	0.00200705	0.034634	-3.55587	1.15107	3.10678	4.7778	0.440084	1.54736	0.245879	1.54736
APOBEC3G	ENST00000407997.4	0.00201532	0.0347585	-0.704736	0.22822	4.28178	0.139414	0.019535	0.0186211	0.0585917	0.0585917
CENPH	ENST00000502689.1	0.00202397	0.0348986	-3.05144	0.98858	2.43344	2.79835	0.967392	0.232902	0.498543	0.498543
RAD17	ENST00000616759.4	0.00202532	0.0349128	-4.30099	1.39349	2.47458	7.1578	2.43324	-0.611562	0.479472	0.479472
GK5	ENST00000480757.5	0.00204917	0.0352412	-3.68802	1.19624	3.18629	4.91063	1.22088	0.925595	0.222708	0.925595
VSNL1	ENST00000457525.5	0.00205173	0.0352495	-0.891653	0.28925	4.28923	0.330698	0.0346998	0.0907982	0.0580922	0.0907982
NASP	ENST00000470768.5	0.00205178	0.0352495	-1.1762	0.381557	6.66452	0.770502	0.0178211	0.200558	0.0129369	0.200558
KCNT2	ENST00000609185.5	0.00205997	0.0353626	-4.23272	1.37361	1.79046	4.91344	1.96123	0.100454	0.868995	0.868995
ILK	ENST00000526711.5	0.00206376	0.0354106	-3.74824	1.2166	3.14777	4.92518	0.812079	1.40811	0.233711	1.40811
RAB17	ENST00000477149.5	0.00208069	0.0356812	-1.26535	0.411033	4.07071	0.525448	0.032725	0.220698	0.075274	0.220698
NA	ENST00000546136.5	0.00210916	0.0360504	-4.12636	1.34216	1.52315	4.47721	1.63551	0.00749268	1.06658	1.06658
DONSON	ENST00000442660.5	0.0021107	0.0360558	-3.98576	1.29652	3.12118	5.02251	1.30189	1.21956	0.241552	1.21956
MYCN	ENST00000638417.1	0.00211976	0.0361893	-4.05999	1.32122	4.31923	5.06133	1.59448	1.02394	0.0561385	1.02394
WDR47	ENST00000369965.8	0.00212016	0.0361893	-4.04709	1.31704	3.59452	5.74924	0.720704	1.88119	0.134382	1.88119
ATP2A2	ENST00000377685.9	0.00212411	0.0362381	-0.635736	0.206925	7.53233	0.125611	0.00648774	0.057739	0.0102969	0.057739
STMN1	ENST00000357865.6	0.00212891	0.0362918	-4.18704	1.36313	2.84536	12.4206	0.780557	2.00663	0.332198	2.00663
NA	ENST00000649997.1	0.00214201	0.0364409	-0.766557	0.249709	7.04489	0.202748	0.00855409	0.0849777	0.0114546	0.0849777
NA	ENST00000402717.6	0.00214206	0.0364409	-3.83133	1.24808	2.37505	3.97937	1.81001	-0.427226	0.526531	0.526531
AC025423.2	ENST00000537570.1	0.00215052	0.0365473	-0.665692	0.216936	4.41745	0.101977	0.0202366	0.000938513	0.0503549	0.0503549
LAYN	ENST00000375615.7	0.00215212	0.0365518	-0.920475	0.299986	4.87107	0.247743	0.101555	-0.0160055	0.0334327	0.0334327
MRPL40	ENST00000443660.5	0.00215299	0.0365518	-0.640439	0.208729	4.91322	0.112359	0.0329224	0.00284024	0.0324294	0.0324294
ANKRD11	ENST00000642443.1	0.00216619	0.0367474	-2.95145	0.962497	3.78767	2.71196	1.28316	-0.633325	0.106441	0.106441
RNMT	ENST00000543302.6	0.00217857	0.036863	-1.74511	0.569414	3.66623	1.0591	0.363009	0.0240478	0.123339	0.123339
UQCC1	ENST00000374380.6	0.00222217	0.0373714	-3.44776	1.12716	1.38008	4.25869	0.722863	1.01582	1.18286	1.18286
DTNA	ENST00000597599.5	0.00224206	0.0375789	-4.16926	1.36422	1.40638	4.30359	1.63075	-0.238966	1.16091	1.16091
CMKLR1	ENST00000550402.6	0.00224901	0.0376695	-3.74942	1.22722	2.45695	3.8258	1.77153	-0.735756	0.487578	0.487578
PSMG1	ENST00000411828.5	0.00225027	0.037681	-0.848624	0.277778	5.41561	0.225279	0.0304413	0.0852996	0.0237168	0.0852996
NTMT1	ENST00000372480.1	0.00225671	0.0377544	-0.667789	0.218647	5.15388	0.150704	0.0440072	0.0195969	0.0277027	0.0277027
TRMT2B	ENST00000545398.5	0.0022602	0.0377709	-0.592464	0.194014	5.65901	0.105167	0.0360847	0.0119568	0.0203771	0.0203771
RPS6KC1	ENST00000615329.4	0.00230234	0.0383009	-0.760934	0.249636	5.7164	0.131327	0.0738166	-0.0458235	0.0196603	0.0196603
PTP4A2	ENST00000602725.5	0.00231478	0.0384305	-0.964337	0.316533	7.12279	0.471702	0.0742092	0.0760806	0.0112174	0.0760806
PHLDA1	ENST00000602540.5	0.00231676	0.0384538	-0.613406	0.201361	7.17005	0.119276	0.0272502	0.0335691	0.0110838	0.0335691
HEY1	ENST00000354724.8	0.00231947	0.0384892	-3.08538	1.01295	2.60723	3.67422	0.793442	0.74565	0.421706	0.74565
CHPF	ENST00000535926.2	0.00232389	0.0385431	-3.72297	1.2225	4.06103	4.29571	1.53401	0.707744	0.0761642	0.707744
OPA1	ENST00000644841.1	0.00233321	0.0386686	-3.92005	1.28772	2.96416	4.14405	2.19589	-0.560913	0.291451	0.291451
NGLY1	ENST00000417874.6	0.0023378	0.0387253	-0.598644	0.196691	5.72216	0.108866	0.0384393	0.00654718	0.0195916	0.0195916
SNAP23	ENST00000397138.5	0.00234679	0.0387771	-0.864455	0.284133	4.08906	0.249019	0.0474799	0.0588293	0.0736177	0.0736177
LRRC34	ENST00000522830.5	0.00234635	0.0387771	-2.42742	0.797843	2.88574	2.30247	0.424037	0.530792	0.318162	0.530792
AHSA1	ENST00000555133.5	0.00235149	0.0388353	-1.2949	0.425697	4.31941	0.454107	0.2157	-0.0298802	0.0561272	0.0561272
COG5	ENST00000640820.1	0.00235997	0.0389463	-1.07207	0.35257	5.03952	0.27322	0.156691	-0.0811178	0.0297671	0.0297671
LPAR6	ENST00000620633.4	0.00237053	0.0390524	-2.74163	0.902032	3.29022	2.94627	0.264652	0.95584	0.195256	0.95584
SMC1A	ENST00000463684.1	0.00239929	0.0393986	-0.873114	0.28761	4.93628	0.236872	0.02676	0.097319	0.031907	0.097319
CAT	ENST00000650153.1	0.00240334	0.0394456	-3.299	1.08689	1.62492	2.37984	0.783593	-0.568726	0.988418	0.988418
WDR73	ENST00000560966.5	0.00240417	0.0394494	-0.847338	0.279175	4.22177	0.159067	0.0540808	-0.0271207	0.0628274	0.0628274
SEMA6A	ENST00000515009.5	0.00241369	0.0395553	-4.443	1.46442	2.67278	8.21056	1.38355	1.83326	0.395295	1.83326
CA8	ENST00000317995.5	0.0024218	0.0396404	-0.795074	0.262146	5.11793	0.197349	0.00933222	0.0937486	0.0283226	0.0937486
SH3BGR	ENST00000380634.5	0.00242307	0.0396513	-3.37435	1.11262	2.73162	3.85521	0.734738	1.12216	0.3728	1.12216
MGA	ENST00000564190.1	0.00242667	0.0396808	-0.655461	0.216157	4.87678	0.132888	0.0367927	-0.00104336	0.033293	0.033293
RNF152	ENST00000312828.4	0.00243958	0.0398131	-0.872823	0.28799	4.63046	0.237212	0.00984183	0.114566	0.0407072	0.114566
TUT4	ENST00000371541.5	0.00245238	0.0399445	-0.645966	0.213249	4.72172	0.153877	0.0306241	0.0121564	0.0375889	0.0375889
ADIPOR1	ENST00000417068.5	0.00246334	0.0400724	-4.05251	1.33843	1.46721	4.24804	1.57596	-0.0715749	1.11114	1.11114
GREB1	ENST00000381483.6	0.00248	0.0402711	-1.71525	0.56688	3.21274	0.646736	0.266621	-0.169132	0.215409	0.215409
KIF16B	ENST00000408042.5	0.00248103	0.0402711	-3.78549	1.25113	3.27107	5.15983	0.440907	1.9071	0.200061	1.9071
TUBB6	ENST00000317702.9	0.00250829	0.0406031	-0.611986	0.202487	7.858	0.129448	0.000552817	0.0609489	0.00991809	0.0609489
NPNT	ENST00000379987.6	0.0025253	0.0407896	-0.618598	0.204814	4.64421	0.13898	0.022719	0.0286772	0.040204	0.040204
EIF4G1	ENST00000441154.5	0.00253758	0.040888	-2.07019	0.685759	6.5884	1.15306	0.692111	-0.233849	0.0132878	0.0132878
RAB11FIP1	ENST00000524118.1	0.00254047	0.0409247	-2.89746	0.959907	2.00367	2.6576	0.652505	0.503223	0.729628	0.729628
MNAT1	ENST00000554002.5	0.00254123	0.0409269	-0.629112	0.208426	4.66314	0.0986859	0.0256306	0.00658971	0.0395318	0.0395318
PDCD10	ENST00000475915.6	0.00255062	0.0410228	-3.82118	1.26644	3.45905	4.0309	2.24783	-0.670961	0.157962	0.157962
MAP1A	ENST00000382031.5	0.00256713	0.0411955	-4.4877	1.4883	1.7206	5.30381	2.40432	-0.454029	0.918247	0.918247
CDA	ENST00000375071.4	0.002574	0.0412538	-0.771997	0.256094	4.34425	0.25381	0.0313787	0.0669978	0.0545774	0.0669978
FNBP1L	ENST00000604705.5	0.0025838	0.0413909	-5.26845	1.74837	2.36545	9.40236	1.33899	3.2462	0.531232	3.2462
FLRT2	ENST00000554746.1	0.00261744	0.0418386	-1.23846	0.411528	3.34089	0.399531	0.0709326	0.0368916	0.1831	0.1831
STRN4	ENST00000599231.5	0.00262984	0.0419759	-3.71992	1.23668	1.59217	5.07949	0.848959	1.4451	1.01317	1.4451
CAPN2	ENST00000433674.6	0.00263096	0.0419765	-4.01362	1.33438	2.31117	6.22241	2.11251	-0.923306	0.55834	0.55834
DNM2	ENST00000587830.2	0.00265328	0.042238	-4.13915	1.37729	1.75697	5.94891	1.45816	1.38722	0.892393	1.38722
DCC	ENST00000412726.5	0.00266062	0.0423243	-4.50038	1.4979	1.81759	6.03264	2.51524	0.261283	0.850337	0.850337
CTDNEP1	ENST00000572043.5	0.00266848	0.0424186	-4.67534	1.5566	2.23602	8.37668	0.878238	2.75628	0.597286	2.75628
EPAS1	ENST00000263734.5	0.00272003	0.0430417	-1.15126	0.384045	4.79796	0.47826	0.0553623	0.165873	0.035339	0.165873
TRIM51	ENST00000449290.6	0.00272446	0.0430859	-2.6921	0.898196	1.80406	2.39538	0.350524	0.239196	0.859609	0.859609
AKAP13	ENST00000558644.2	0.00274067	0.0433061	-1.16908	0.390289	3.94036	0.478408	0.140217	0.0306334	0.0882706	0.0882706
MDM2	ENST00000350057.9	0.00274779	0.0434082	-5.37458	1.79474	3.08908	9.05111	1.5392	3.29244	0.251273	3.29244
NAA50	ENST00000497525.5	0.00276338	0.0435922	-0.868055	0.290038	5.73367	0.298002	0.0459831	0.0801999	0.0194558	0.0801999
SENP6	ENST00000503501.1	0.00276887	0.0436578	-0.599065	0.200202	5.57036	0.215796	0.0385425	0.0209345	0.021579	0.021579
IAH1	ENST00000487850.5	0.00278115	0.0438202	-3.58875	1.19987	1.8612	3.1475	1.33864	-0.871774	0.820899	0.820899
KPNA1	ENST00000482287.5	0.00278836	0.0439025	-4.15351	1.38906	1.47526	4.49836	1.78959	-0.129884	1.10465	1.10465
TIGIT	ENST00000383671.8	0.00279173	0.0439345	-2.26871	0.758822	2.04156	1.52279	0.157068	0.572814	0.706647	0.706647
SULT1C2	ENST00000326853.9	0.00279349	0.0439429	-3.30566	1.10572	1.33705	2.5098	0.614584	-0.427257	1.21935	1.21935
PRUNE2	ENST00000428286.5	0.00279865	0.0439991	-3.78669	1.26686	4.32101	4.8024	2.35139	-0.303056	0.0560251	0.0560251
CUL1	ENST00000409469.5	0.0028251	0.0442701	-0.718838	0.240724	5.43126	0.170057	0.0375162	0.0494057	0.0234972	0.0494057
APAF1	ENST00000547045.5	0.00284428	0.044518	-3.48561	1.16807	2.07975	7.652	1.36253	0.0360483	0.684035	0.684035
UAP1	ENST00000367926.8	0.00285616	0.0446406	-0.817614	0.274109	5.26497	0.194769	0.0867854	-0.0581838	0.0259181	0.0259181
DDX18	ENST00000476149.1	0.00286042	0.0446937	-0.613216	0.205615	4.56004	0.115744	0.0199233	0.0157133	0.0434929	0.0434929
MCTP2	ENST00000357742.9	0.00287595	0.0448969	-0.747434	0.250758	4.25625	0.153755	0.0339725	0.0158365	0.0603471	0.0603471
MYO1D	ENST00000577352.5	0.00289057	0.0451038	-4.05675	1.36172	1.38196	4.14194	1.60012	-0.19838	1.18129	1.18129
UAP1L1	ENST00000474787.1	0.00294513	0.0458039	-1.3807	0.46435	3.58536	0.707217	0.1494	0.174031	0.13585	0.174031
RAF1	ENST00000432427.2	0.00296749	0.0460219	-0.852502	0.286933	5.38	0.246208	0.0848943	0.0386014	0.0242215	0.0386014
GMEB1	ENST00000480454.1	0.00297383	0.046077	-4.13883	1.39334	3.27023	5.50589	1.30267	1.60944	0.200275	1.60944
SACS	ENST00000382292.9	0.00298938	0.0462204	-0.613543	0.206662	7.32487	0.162821	0.0155204	0.0485431	0.0106975	0.0485431
RPAIN	ENST00000536255.6	0.00299297	0.0462651	-0.697049	0.234818	4.30446	0.145504	0.0256205	0.0411452	0.057089	0.057089
CDK13	ENST00000643859.1	0.00300263	0.0463928	-4.88904	1.64754	3.3443	7.74363	2.10034	1.97126	0.18231	1.97126
UBE2D3	ENST00000508474.5	0.00302622	0.0466647	-1.00023	0.337339	3.64545	0.300027	0.0442406	0.0232703	0.126456	0.126456
BAZ2A	ENST00000547650.1	0.00303388	0.0467556	-4.26165	1.43767	1.92658	6.67525	0.618104	2.48222	0.778067	2.48222
SEMA3C	ENST00000265361.8	0.00306702	0.0471218	-1.3035	0.440233	3.302	0.572887	0.0983515	0.159473	0.192356	0.192356
CD8B	ENST00000393759.6	0.00306847	0.0471239	-3.17616	1.07274	1.68159	2.50437	0.779681	0.000595418	0.946474	0.946474
FAR1	ENST00000532502.1	0.0030729	0.0471701	-0.669748	0.22624	4.47708	0.133615	0.0295013	0.0139633	0.0472752	0.0472752
APOBEC3D	ENST00000427494.6	0.00309459	0.0474041	-3.50134	1.18361	2.15393	3.09097	1.45968	-0.585723	0.641725	0.641725
TLE5	ENST00000586839.1	0.00312404	0.0477539	-0.704875	0.238515	4.53264	0.14684	0.0406545	-0.00696051	0.0446798	0.0446798
NOL8	ENST00000477862.1	0.00313214	0.0478021	-3.13205	1.06011	1.84366	2.59558	0.853087	0.102717	0.832657	0.832657
RNF115	ENST00000539368.2	0.0031527	0.0480826	-0.637404	0.21589	4.74712	0.112805	0.0331063	0.0114609	0.0368067	0.0368067
RCBTB1	ENST00000258646.3	0.00316516	0.0482393	-3.62198	1.22728	4.76087	4.68441	1.66967	0.589657	0.0363972	0.589657
WNT3	ENST00000225512.6	0.00318323	0.0484679	-3.43429	1.16438	2.70641	4.20027	1.65136	-0.557725	0.382298	0.382298
SLC50A1	ENST00000368404.9	0.00320153	0.0486815	-0.585535	0.198642	5.89783	0.1871	0.0143487	0.044839	0.0177387	0.044839
WRN	ENST00000650667.1	0.00320081	0.0486815	-0.755854	0.256416	6.53804	0.232182	0.0160437	0.0825801	0.0135272	0.0825801
CFAP97	ENST00000647728.1	0.00323704	0.0490298	-3.95393	1.34292	2.28134	3.68824	2.13153	-1.39339	0.573606	0.573606
ETS1	ENST00000392668.8	0.00324875	0.0491339	-0.58661	0.199313	7.76048	0.112131	0.000508449	0.0590799	0.0100007	0.0590799
DACT1	ENST00000421793.5	0.00325081	0.0491426	-1.82316	0.619498	3.91497	1.08969	0.484601	-0.383833	0.0910655	0.0910655
MSANTD3-TMEFF1	ENST00000502978.1	0.00325211	0.0491426	-0.7081	0.240618	6.4842	0.505606	0.021381	0.0654642	0.0137914	0.0654642
SACS	ENST00000402364.1	0.00327264	0.0493319	-0.735866	0.250218	6.99857	0.365187	0.082308	-0.027942	0.0116057	0.0116057
NR4A2	ENST00000339562.9	0.00330158	0.049655	-3.28788	1.11902	2.0706	5.48933	0.181642	1.69668	0.689404	1.69668
DNAL1	ENST00000554339.5	0.00331414	0.0497878	-2.5755	0.876917	2.46398	1.86394	0.669144	0.0501605	0.48433	0.48433
NCAPH	ENST00000455200.5	0.00331993	0.0498404	-4.37636	1.49036	3.8671	6.78372	0.238076	3.09367	0.0965754	3.09367
UNC119	ENST00000484980.5	0.00332476	0.0499016	-0.639774	0.217907	4.74324	0.131204	0.0150525	0.0561725	0.0369239	0.0561725
PCM1	ENST00000522275.5	0.0033314	0.0499785	-0.604535	0.205948	6.22352	0.129092	0.00942136	0.0542003	0.0152443	0.0542003

## Sheet: iPSC, WT v RNF20 Het2, WT down
ext_gene	target_id	pval	qval	b	se_b	mean_obs	var_obs	tech_var	sigma_sq	smooth_sigma_sq	final_sigma_sq
MID1IP1	ENST00000336949.6	1.55604e-54	3.43158e-50	7.43268	0.477942	4.27708	13.9254	0.283733	-0.244375	0.0589099	0.0589099
RPL13	ENST00000565571.5	3.47237e-44	4.59464e-40	1.17717	0.0844277	8.07274	0.317747	0.000865767	0.00578791	0.00982629	0.00982629
KHSRP	ENST00000619396.4	2.50626e-43	2.36878e-39	7.85432	0.569104	4.58978	15.7929	0.443547	-0.322873	0.0422721	0.0422721
HMGA1	ENST00000401473.7	4.24863e-42	3.51362e-38	1.38437	0.101824	8.82279	0.39916	0.00506436	-0.000600118	0.0104878	0.0104878
FTH1	ENST00000530019.5	1.39503e-40	1.0255e-36	1.67804	0.125811	7.91196	0.637927	0.0138591	0.00305108	0.00988342	0.00988342
GPR176	ENST00000561100.1	2.40867e-40	1.59358e-36	1.17867	0.0886419	7.39645	0.287279	0.00124149	0.0103054	0.0105446	0.0105446
HAPLN3	ENST00000359595.7	1.28176e-36	7.70918e-33	1.29181	0.102205	6.68472	0.366226	0.00223515	0.0134338	0.0128456	0.0134338
TPT1	ENST00000527226.2	1.70248e-35	9.38636e-32	1.55823	0.125317	6.73835	0.590807	0.0109499	0.00499104	0.0126067	0.0126067
BCAM	ENST00000270233.11	8.46915e-28	4.31014e-24	0.964383	0.0882488	7.5717	0.1791	0.00144651	0.00469708	0.0102353	0.0102353
RPL8	ENST00000394920.6	1.74576e-27	8.24995e-24	1.05268	0.0969124	9.01727	0.244463	0.00315792	0.00820835	0.0109301	0.0109301
CALM1	ENST00000553995.5	5.13028e-26	2.2628e-22	6.3595	0.602849	3.62744	10.5343	0.415927	-0.385548	0.129213	0.129213
KLF11	ENST00000305883.6	3.78254e-25	1.56408e-21	5.66795	0.547116	3.15398	8.62205	0.217097	0.168103	0.231908	0.231908
TENT5B	ENST00000289166.6	1.9356e-23	7.11439e-20	0.819382	0.0821329	8.24855	0.13719	0.000276172	0.00951432	0.00984254	0.00984254
CNOT9	ENST00000418808.1	2.55684e-23	8.9032e-20	5.29637	0.532372	2.83812	7.04533	0.0904025	-0.0490163	0.334728	0.334728
TPT1	ENST00000442760.2	1.09141e-22	3.61039e-19	0.974812	0.0994388	6.80463	0.212574	0.00250589	0.00831495	0.0123262	0.0123262
NOP53	ENST00000246802.10	2.11909e-21	6.67615e-18	0.793914	0.0835787	8.42863	0.124995	0.000532948	0.00160947	0.00994515	0.00994515
COL6A2	ENST00000300527.8	3.21223e-21	9.66005e-18	0.898197	0.0949912	7.99034	0.161902	0.000862509	0.0126725	0.00984697	0.0126725
SLC16A2	ENST00000587091.6	9.00924e-21	2.59153e-17	1.04115	0.111388	7.27582	0.217576	0.00618176	0.0124291	0.0108115	0.0124291
GALNT17	ENST00000333538.10	9.4334e-21	2.60047e-17	0.880161	0.0942132	7.44261	0.157339	0.00285992	0.003077	0.0104543	0.0104543
RGMA	ENST00000542321.6	5.33423e-18	1.22822e-14	0.823973	0.0953013	6.89718	0.131711	0.00165916	0.00418933	0.0119643	0.0119643
PCOLCE	ENST00000223061.6	5.29199e-18	1.22822e-14	0.792366	0.0916359	7.08801	0.148297	0.00127502	0.0105565	0.0113207	0.0113207
KNDC1	ENST00000304613.8	6.58795e-18	1.45286e-14	0.982265	0.113927	6.24025	0.20531	0.00432919	0.0102865	0.01514	0.01514
GAA	ENST00000390015.7	9.39347e-18	1.9421e-14	0.732447	0.0853554	7.75423	0.115716	0.000921433	0.004514	0.0100069	0.0100069
RARRES2	ENST00000223271.8	1.01324e-17	2.03139e-14	0.745546	0.0869702	7.43819	0.109802	0.000883067	0.00489721	0.0104626	0.0104626
PTPRS	ENST00000587303.5	1.82201e-17	3.44412e-14	0.786394	0.0924667	7.61412	0.12095	0.00265131	0.00209302	0.0101738	0.0101738
H1-10	ENST00000333762.6	1.80182e-17	3.44412e-14	0.883551	0.103875	8.57704	0.18859	0.000238282	0.0159467	0.0100968	0.0159467
SALL3	ENST00000614625.1	5.56758e-17	9.69346e-14	1.18111	0.141045	5.85273	0.303902	0.00676928	0.0230711	0.0181728	0.0230711
COL6A1	ENST00000361866.7	6.29234e-17	1.04075e-13	1.17203	0.140201	8.83404	0.286595	0.000240131	0.0292445	0.0105101	0.0292445
OTX2	ENST00000408990.7	1.00001e-16	1.57525e-13	1.14018	0.137292	5.71346	0.274636	0.00857816	0.0083321	0.0196957	0.0196957
SNRPN	ENST00000577565.1	1.04027e-16	1.60056e-13	0.789072	0.0950678	8.63803	0.122729	0.00337963	-0.000109276	0.0101772	0.0101772
MFGE8	ENST00000268150.13	1.15009e-16	1.69088e-13	1.12098	0.13525	8.73215	0.323572	0.000788146	0.0266508	0.0103226	0.0266508
HS3ST3B1	ENST00000466596.5	1.14633e-16	1.69088e-13	1.90654	0.230021	5.40752	0.743587	0.0439168	0.0354479	0.0238309	0.0354479
UBE2D2	ENST00000505007.5	2.08243e-16	2.99508e-13	1.38236	0.168226	5.49625	0.627333	0.0198547	-0.00477098	0.0225955	0.0225955
RTN4RL2	ENST00000335099.8	2.54813e-16	3.5869e-13	1.04947	0.128094	6.03594	0.226699	0.00305121	0.021561	0.0165587	0.021561
YBX1	ENST00000332220.10	4.033e-16	5.55882e-13	0.679855	0.0835452	8.59536	0.0937887	0.000349897	0.00406178	0.0101198	0.0101198
NME2	ENST00000512737.5	1.15635e-15	1.53008e-12	0.705221	0.0880534	8.11948	0.120133	0.00180753	0.00771044	0.00982258	0.00982258
AC243919.1	ENST00000466501.1	1.30987e-15	1.63512e-12	0.819705	0.102544	7.56567	0.142756	0.00552861	0.00377692	0.0102444	0.0102444
FBXL19	ENST00000338343.8	1.29109e-15	1.63512e-12	0.779941	0.0975482	7.29829	0.118132	0.00351514	0.00138145	0.0107583	0.0107583
AC011295.1	ENST00000631659.1	1.30987e-15	1.63512e-12	0.819705	0.102544	7.56567	0.142756	0.00552861	0.00377692	0.0102444	0.0102444
MRPS34	ENST00000397375.6	2.54906e-15	3.12307e-12	0.737469	0.0932183	7.34562	0.129294	0.00238293	0.0017627	0.0106515	0.0106515
COMMD7	ENST00000278980.10	2.65914e-15	3.14646e-12	0.786278	0.099454	6.96242	0.123351	0.00310747	0.00668333	0.0117292	0.0117292
LIN28A	ENST00000326279.11	2.66327e-15	3.14646e-12	0.787805	0.0996496	9.84216	0.119454	0.000458931	0.00249402	0.0144361	0.0144361
PIK3CD	ENST00000377346.8	3.26296e-15	3.78732e-12	0.807087	0.102417	6.86734	0.134974	0.00147249	0.0142613	0.0120773	0.0142613
AK4	ENST00000497030.5	4.17801e-15	4.68504e-12	5.1252	0.652936	2.84863	7.30111	0.308433	-0.0169158	0.331056	0.331056
ZHX2	ENST00000314393.6	4.49182e-15	4.95298e-12	0.703121	0.0896794	7.14094	0.0960922	0.000898404	0.00360529	0.0111652	0.0111652
ATP11A	ENST00000419631.1	7.7269e-15	8.11447e-12	5.78557	0.744414	2.96783	7.61611	0.541003	-0.524748	0.290226	0.290226
PAIP1	ENST00000504639.5	1.14798e-14	1.18672e-11	6.05507	0.784164	3.22461	8.70581	0.71017	-0.645404	0.2122	0.2122
COTL1	ENST00000262428.5	1.78122e-14	1.81301e-11	0.686258	0.0895255	8.32509	0.109099	0.00214679	0.0084122	0.00987542	0.00987542
CD24	ENST00000619133.4	2.55991e-14	2.56612e-11	1.23202	0.161707	6.11526	0.311209	0.0232559	-0.0114397	0.0159679	0.0159679
SLC44A2	ENST00000586078.5	2.78684e-14	2.7519e-11	1.11478	0.146531	6.67487	0.258513	0.0108891	0.0213178	0.0128901	0.0213178
ABHD12	ENST00000339157.10	3.63339e-14	3.43408e-11	0.689639	0.0910597	7.17514	0.0939231	0.00136797	0.0027274	0.0110698	0.0110698
HPN	ENST00000392226.5	4.23192e-14	3.91602e-11	1.23192	0.163089	5.72112	0.338564	0.020293	0.0116231	0.0196039	0.0196039
MGAT4B	ENST00000292591.12	4.32088e-14	3.91602e-11	0.764435	0.101237	6.67502	0.121539	0.00248399	0.00969022	0.0128894	0.0128894
MGAT4B	ENST00000638266.2	4.32088e-14	3.91602e-11	0.764435	0.101237	6.67502	0.121539	0.00248399	0.00969022	0.0128894	0.0128894
HLA-C	ENST00000400394.7	4.6043e-14	4.0807e-11	0.644581	0.0854578	7.71702	0.0859689	0.000908659	0.00975118	0.0100459	0.0100459
CLSTN1	ENST00000361311.4	4.62594e-14	4.0807e-11	0.832936	0.110439	7.88067	0.13905	0.0083925	-0.00180253	0.00990257	0.00990257
IGSF8	ENST00000314485.12	5.08293e-14	4.42483e-11	1.17273	0.155746	7.37051	0.327423	0.025787	-0.0020613	0.0105982	0.0105982
FBLN1	ENST00000262722.11	6.24706e-14	5.3676e-11	0.633989	0.0845003	7.85973	0.0976976	0.0007936	0.00784071	0.00991685	0.00991685
ROBO1	ENST00000498428.5	6.43264e-14	5.4562e-11	5.65538	0.754155	3.17257	8.65318	0.626544	-0.317287	0.22658	0.22658
CNMD	ENST00000377962.8	8.61814e-14	7.03921e-11	0.624248	0.0836736	8.61397	0.0799316	0.000357715	0.00399516	0.0101442	0.0101442
FKBP10	ENST00000321562.8	9.2396e-14	7.45478e-11	0.616066	0.0826786	8.24016	0.0747514	0.000413738	0.0040317	0.00983989	0.00983989
ROR1	ENST00000371079.6	1.43026e-13	1.12095e-10	1.04208	0.140946	7.50607	0.249707	0.0129555	0.0168432	0.0103405	0.0168432
USF2	ENST00000222305.8	1.65222e-13	1.25644e-10	0.874536	0.118593	6.87567	0.161228	0.00905088	0.00974136	0.0120454	0.0120454
LINGO1	ENST00000355300.6	1.7462e-13	1.31283e-10	0.972427	0.131999	7.22677	0.205952	0.00492045	0.0212153	0.0109332	0.0212153
ZNF358	ENST00000597229.2	2.08727e-13	1.53438e-10	0.723382	0.0985121	6.72188	0.123061	0.00187768	-0.00124594	0.0126793	0.0126793
LPCAT1	ENST00000283415.4	2.13022e-13	1.54874e-10	1.20203	0.163756	7.9556	0.316718	0.0071276	0.0330963	0.0098611	0.0330963
PAWR	ENST00000548426.1	2.38831e-13	1.69904e-10	1.43665	0.196129	4.99475	0.487213	0.0270417	0.0109327	0.0306581	0.0306581
VRTN	ENST00000256362.5	2.62198e-13	1.84543e-10	0.610334	0.0834644	8.70075	0.0764234	0.000178275	0.00757639	0.0102712	0.0102712
GIGYF1	ENST00000646601.1	2.75083e-13	1.89578e-10	0.632962	0.0866351	7.76684	0.0848824	0.00126393	0.009886	0.00999453	0.00999453
TMUB1	ENST00000297533.9	2.73021e-13	1.89578e-10	0.911268	0.12471	6.16109	0.218346	0.00767818	0.00137409	0.0156508	0.0156508
PTMS	ENST00000309083.7	3.79009e-13	2.5587e-10	1.23874	0.170558	7.17978	0.376179	0.0325781	-0.0087251	0.0110572	0.0110572
TMEFF1	ENST00000374879.5	4.16549e-13	2.77435e-10	0.738242	0.101825	7.04399	0.109937	0.0040952	0.00553667	0.0114574	0.0114574
IRAK1	ENST00000369980.8	4.1934e-13	2.77435e-10	0.742918	0.102483	6.86912	0.113585	0.00368372	0.00973236	0.0120705	0.0120705
SCAP	ENST00000545718.2	5.03659e-13	3.29922e-10	6.26943	0.867824	3.4786	9.89517	0.975442	-0.834606	0.154235	0.154235
RNF138	ENST00000585103.5	5.24974e-13	3.40512e-10	5.53502	0.766764	2.94044	7.48558	0.582453	-0.511045	0.299436	0.299436
TTYH3	ENST00000258796.12	6.42797e-13	4.12888e-10	0.82024	0.114064	8.49523	0.180084	0.00332698	0.0161888	0.0100056	0.0161888
RPL36	ENST00000347512.8	6.76346e-13	4.3026e-10	0.610999	0.0850484	8.50195	0.0818944	0.000837488	0.000541821	0.0100124	0.0100124
H4C11	ENST00000355057.2	7.1635e-13	4.51369e-10	1.00641	0.140241	5.41994	0.250859	0.00584544	0.0210988	0.0236559	0.0236559
PCBP2	ENST00000359282.9	8.22743e-13	5.09776e-10	0.736212	0.102862	7.64656	0.159397	0.00574045	-0.00146894	0.0101303	0.0101303
PTPRZ1	ENST00000471837.1	8.24456e-13	5.09776e-10	4.70245	0.657039	2.48917	5.86099	0.174716	0.0395204	0.472835	0.472835
FKBP8	ENST00000608443.6	9.83419e-13	5.96908e-10	0.620325	0.0869679	8.26633	0.0765159	0.00149635	-0.000984733	0.00984877	0.00984877
MIF	ENST00000215754.8	1.01708e-12	6.11725e-10	0.589951	0.0827633	8.56638	0.0764888	0.000190828	0.00699973	0.0100838	0.0100838
C12orf57	ENST00000229281.6	1.04616e-12	6.23551e-10	0.80219	0.112599	6.82038	0.135539	0.00123819	0.0177797	0.0122622	0.0177797
ABHD8	ENST00000247706.4	1.18096e-12	6.9761e-10	0.917546	0.129094	5.61412	0.170515	0.0040182	0.00950192	0.0209797	0.0209797
DOT1L	ENST00000398665.8	1.19628e-12	7.00406e-10	0.605705	0.085241	7.58299	0.0734685	0.000680629	0.00387951	0.0102184	0.0102184
QPRT	ENST00000449759.1	1.25933e-12	7.24495e-10	1.16856	0.164616	5.22438	0.329852	0.0140981	-0.00133942	0.0265498	0.0265498
RAB10	ENST00000495146.5	1.25455e-12	7.24495e-10	1.33398	0.187905	5.94938	0.517674	0.0356891	0.00248075	0.0172735	0.0172735
TMEM132A	ENST00000005286.8	1.5499e-12	8.8398e-10	0.80089	0.113281	6.74554	0.137449	0.00667346	0.0118507	0.0125754	0.0125754
CLDN3	ENST00000395145.3	1.5849e-12	8.88618e-10	0.966866	0.136817	5.45404	0.192379	0.00489897	0.00856945	0.0231794	0.0231794
COL2A1	ENST00000380518.8	1.6964e-12	9.43142e-10	0.721645	0.102254	6.70587	0.106958	0.00293296	0.00855888	0.0127507	0.0127507
H3P6	ENST00000369387.4	1.86233e-12	1.02626e-09	6.53542	0.927743	4.74976	11.0073	1.05988	0.23118	0.0367273	0.23118
CTDNEP1	ENST00000318988.10	1.97475e-12	1.0709e-09	0.774333	0.110049	6.89271	0.139578	0.00618518	0.00151235	0.011981	0.011981
RND1	ENST00000309739.6	2.16446e-12	1.15865e-09	1.07955	0.153706	5.705	0.278651	0.00415295	0.0312854	0.0197981	0.0312854
GRIK5	ENST00000593562.5	2.17159e-12	1.15865e-09	0.72873	0.103763	6.75021	0.109625	0.00359509	0.00632801	0.0125552	0.0125552
MIDN	ENST00000591446.6	2.63488e-12	1.37263e-09	1.3209	0.18881	7.03004	0.469647	0.0419715	0.00456164	0.0115022	0.0115022
PSAP	ENST00000394934.4	3.04311e-12	1.57291e-09	0.683624	0.0980005	7.68023	0.101016	0.00431792	0.00091965	0.0100882	0.0100882
OPLAH	ENST00000618853.5	3.8083e-12	1.95316e-09	0.912135	0.131354	6.13738	0.206224	0.0029201	0.0229606	0.0158128	0.0229606
C1QBP	ENST00000225698.8	4.61701e-12	2.3497e-09	0.636604	0.0920363	7.79634	0.11322	0.00167567	0.0110304	0.00996732	0.0110304
NACA	ENST00000546862.5	4.68223e-12	2.36471e-09	0.64092	0.0926869	7.47519	0.0815537	0.00249191	0.00206279	0.0103944	0.0103944
LAMB2	ENST00000305544.9	4.74467e-12	2.37809e-09	0.667437	0.0965479	7.63859	0.0880744	0.00384154	0.00220925	0.0101407	0.0101407
CD24	ENST00000610952.1	4.80981e-12	2.39261e-09	1.6809	0.243218	5.39692	0.645042	0.0197882	0.0689447	0.0239808	0.0689447
SPINT2	ENST00000301244.12	4.85271e-12	2.39593e-09	0.605085	0.0875688	7.98551	0.0904185	0.0016537	0.00420486	0.00984874	0.00984874
HCN4	ENST00000261917.4	5.07509e-12	2.46888e-09	0.688547	0.0997394	6.57981	0.09659	0.00159377	0.00866597	0.0133282	0.0133282
ANKRD11	ENST00000567736.6	5.20037e-12	2.51136e-09	0.844556	0.1224	6.80207	0.161598	0.00134877	0.0211237	0.0123367	0.0211237
MFGE8	ENST00000268151.11	5.43466e-12	2.60548e-09	0.882019	0.127945	6.7353	0.15566	0.0119349	0.000983893	0.0126201	0.0126201
AC073896.1	ENST00000548360.1	5.65842e-12	2.67401e-09	1.1639	0.168975	5.63443	0.309654	0.0221264	0.000288798	0.0207026	0.0207026
MBD6	ENST00000355673.8	5.74891e-12	2.67851e-09	0.670598	0.0973895	6.68038	0.0945504	0.00136185	0.0122094	0.0128652	0.0128652
ZNF580	ENST00000325333.10	5.73635e-12	2.67851e-09	0.886191	0.128694	5.98405	0.195546	0.00786534	0.00568589	0.0169777	0.0169777
EMC10	ENST00000376918.7	5.86245e-12	2.71231e-09	0.80062	0.116319	6.88048	0.12907	0.00826812	0.00304149	0.0120271	0.0120271
PRRC2B	ENST00000405995.5	6.04164e-12	2.7758e-09	0.664352	0.0965816	7.80221	0.0874535	0.00402981	-0.000288532	0.00996219	0.00996219
CYP2S1	ENST00000310054.9	6.24416e-12	2.84906e-09	0.611685	0.0889857	8.99617	0.0834563	0.00014206	0.0117356	0.0108761	0.0117356
GPAA1	ENST00000355091.9	6.69972e-12	3.03598e-09	0.672001	0.0979035	6.71504	0.103102	0.00166792	0.00231643	0.0127097	0.0127097
TMEM200A	ENST00000296978.3	7.27623e-12	3.2748e-09	0.874101	0.127567	6.28024	0.149273	0.00951212	-0.002756	0.0148977	0.0148977
B3GNT7	ENST00000287590.6	8.15132e-12	3.59527e-09	0.832137	0.121731	7.57329	0.164377	0.000606293	0.0216214	0.0102329	0.0216214
CYBA	ENST00000261623.8	9.69516e-12	4.24789e-09	0.602376	0.0884422	7.22384	0.101956	0.000792288	0.00975335	0.0109407	0.0109407
PLEKHG3	ENST00000247226.13	1.1059e-11	4.81355e-09	0.931532	0.137151	6.75316	0.191402	0.00240837	0.0258074	0.0125425	0.0258074
CHTF8	ENST00000448552.6	1.32666e-11	5.73671e-09	0.603714	0.0892316	7.92449	0.0738396	0.00206692	0.00368854	0.00987649	0.00987649
EFR3A	ENST00000637848.1	1.36904e-11	5.88156e-09	0.773433	0.114394	6.59456	0.18564	0.00549759	0.0141313	0.0132589	0.0141313
MTCH1	ENST00000373616.9	1.39349e-11	5.94795e-09	0.588866	0.0871286	8.07774	0.0722201	0.00156147	0.00578448	0.00982562	0.00982562
SART3	ENST00000546728.5	1.45562e-11	6.17333e-09	6.32388	0.936557	4.13612	10.4652	1.24615	-1.13724	0.0695576	0.0695576
MSI2	ENST00000416426.6	1.51032e-11	6.32421e-09	1.33047	0.197197	5.2907	0.348322	0.0328021	-0.0222617	0.0255278	0.0255278
WIZ	ENST00000545156.5	1.51e-11	6.32421e-09	0.924794	0.137069	6.44518	0.192816	0.0141928	0.0060743	0.013989	0.013989
RPS3	ENST00000530721.5	1.60654e-11	6.64303e-09	0.64539	0.0957845	8.58846	0.121348	0.00180842	0.0119536	0.010111	0.0119536
OS9	ENST00000315970.12	1.62874e-11	6.69301e-09	0.708243	0.105144	7.09343	0.107442	0.00527857	0.00988537	0.0113043	0.0113043
NPDC1	ENST00000371601.5	2.13286e-11	8.71048e-09	0.86175	0.128684	5.92244	0.166875	0.00732677	0.000174676	0.0175127	0.0175127
CTDSP1	ENST00000273062.6	2.15078e-11	8.7298e-09	0.706623	0.105539	6.34981	0.0989614	0.00220944	0.00470452	0.0144981	0.0144981
UBE2S	ENST00000589978.1	2.20664e-11	8.90189e-09	0.622084	0.0929642	7.05209	0.0955525	0.00153179	0.00547235	0.0114317	0.0114317
ABHD4	ENST00000428304.6	2.37748e-11	9.47557e-09	0.590876	0.0884448	7.26622	0.0732874	0.000899001	0.00930714	0.0108347	0.0108347
MYL6B	ENST00000552568.5	2.4054e-11	9.52862e-09	0.909985	0.136245	5.88254	0.185871	0.00996123	0.00276601	0.0178829	0.0178829
RPL35A	ENST00000429437.5	2.4196e-11	9.52862e-09	0.670271	0.100368	7.00554	0.0927144	0.00352796	0.00445949	0.0115825	0.0115825
SALL2	ENST00000537235.2	2.78276e-11	1.08939e-08	0.599962	0.0901165	8.63062	0.0940149	0.00201461	0.00210443	0.0101669	0.0101669
ALDH2	ENST00000548536.1	2.84998e-11	1.10915e-08	0.97025	0.145812	6.42074	0.220806	0.017776	-9.5153e-05	0.0141157	0.0141157
MAZ	ENST00000219782.10	3.3504e-11	1.28544e-08	0.642255	0.0968668	7.81576	0.133917	0.00412407	0.00749512	0.0099507	0.0099507
MEGF8	ENST00000251268.11	3.36126e-11	1.28544e-08	0.686356	0.103526	7.50724	0.103924	0.00399325	0.0120831	0.0103385	0.0120831
TMEM184B	ENST00000361906.8	3.73891e-11	1.41598e-08	0.592273	0.0895475	7.71591	0.0735453	0.001981	0.000440012	0.0100471	0.0100471
HNRNPDL	ENST00000502762.4	3.85572e-11	1.42511e-08	1.22964	0.18604	5.60921	0.394715	0.0308696	0.000288274	0.021047	0.021047
NDUFS8	ENST00000313468.10	4.11292e-11	1.50338e-08	0.608565	0.0922074	7.04209	0.0875741	0.00128985	0.00908906	0.0114635	0.0114635
SPSB4	ENST00000310546.3	4.19725e-11	1.52577e-08	0.917999	0.139155	5.70225	0.233921	0.0092146	0.00805204	0.0198316	0.0198316
DPEP3	ENST00000268793.5	4.37019e-11	1.57716e-08	0.802366	0.121738	5.75483	0.146885	0.00301807	0.0141069	0.019212	0.019212
GRSF1	ENST00000505068.5	4.38629e-11	1.57716e-08	1.03641	0.157261	5.99671	0.441568	0.0202236	0.0073136	0.016873	0.016873
QPRT	ENST00000395384.9	4.66825e-11	1.66947e-08	0.622505	0.0945891	8.06839	0.0883812	0.000420867	0.0129998	0.00982693	0.0129998
BICRA	ENST00000396720.7	5.90609e-11	2.07844e-08	0.67423	0.102997	6.75969	0.0926065	0.00339825	0.00159538	0.0125144	0.0125144
CHPF	ENST00000243776.11	6.43976e-11	2.25426e-08	0.593297	0.0908132	7.5967	0.13881	0.00217214	0.00753155	0.0101984	0.0101984
MFSD10	ENST00000355443.9	6.87106e-11	2.38005e-08	0.951611	0.145876	6.78059	0.193922	0.00602014	0.0258994	0.0124259	0.0258994
TSTD1	ENST00000423014.3	7.01133e-11	2.41599e-08	0.828375	0.127043	5.76523	0.157998	0.00511515	0.0143758	0.0190948	0.0190948
RAB25	ENST00000361084.10	7.78876e-11	2.66369e-08	0.727283	0.11181	6.24796	0.102754	0.00365976	0.000699573	0.0150925	0.0150925
NEFM	ENST00000221166.10	7.81069e-11	2.66369e-08	0.787401	0.12106	6.8838	0.14967	0.00263668	0.0193467	0.0120146	0.0193467
SLC6A9	ENST00000372310.7	7.87334e-11	2.67128e-08	0.875716	0.134663	6.52062	0.207369	0.00365143	0.0235499	0.0136117	0.0235499
VPS51	ENST00000279281.8	7.97838e-11	2.69311e-08	0.719506	0.110676	7.31173	0.111473	0.004442	0.0139318	0.0107273	0.0139318
MIER2	ENST00000619835.4	8.42647e-11	2.82993e-08	0.828603	0.127619	5.9428	0.171009	0.00431527	0.0201147	0.0173312	0.0201147
LRIG1	ENST00000273261.7	8.64493e-11	2.85974e-08	0.679718	0.10475	7.59703	0.10791	0.00171167	0.0147473	0.010198	0.0147473
NA	ENST00000631853.1	8.64493e-11	2.85974e-08	0.679718	0.10475	7.59703	0.10791	0.00171167	0.0147473	0.010198	0.0147473
RPL13A	ENST00000477613.6	8.71714e-11	2.86928e-08	0.597322	0.0920703	8.9993	0.0798496	0.00183138	0.0085144	0.010884	0.010884
NAT14	ENST00000205194.5	9.82613e-11	3.18675e-08	0.659999	0.102015	6.56871	0.104859	0.00223011	-2.07846e-05	0.0133806	0.0133806
LAPTM4B	ENST00000521545.6	9.93778e-11	3.20724e-08	0.676263	0.104557	7.32352	0.0994757	0.00375722	0.012641	0.0107005	0.012641
PIM3	ENST00000360612.5	1.08639e-10	3.4891e-08	0.68683	0.106412	6.28349	0.0968599	0.002107	0.00775691	0.0148784	0.0148784
NT5C	ENST00000245552.7	1.13786e-10	3.61928e-08	0.734675	0.113949	6.19891	0.117514	0.00407535	0.011762	0.0154012	0.0154012
CLN6	ENST00000249806.11	1.17993e-10	3.71735e-08	0.62431	0.0969141	7.10799	0.0839509	0.00122795	0.0128606	0.0112608	0.0128606
CDK16	ENST00000357227.9	1.40249e-10	4.33593e-08	1.39003	0.216663	6.70257	0.448887	0.057649	-0.0236962	0.0127655	0.0127655
RPL13P12	ENST00000392730.2	1.43202e-10	4.40662e-08	0.658617	0.102709	6.4462	0.102913	0.00184003	0.00352293	0.0139837	0.0139837
GUSB	ENST00000304895.9	1.53171e-10	4.69157e-08	0.608326	0.0950185	6.83715	0.0719978	0.0013476	0.00174685	0.0121952	0.0121952
COL18A1	ENST00000651438.1	1.59988e-10	4.85541e-08	0.613275	0.0958911	9.54897	0.0833136	0.000950733	0.0112077	0.0128419	0.0128419
SOD3	ENST00000382120.4	1.61064e-10	4.86574e-08	0.993658	0.155392	5.22737	0.214303	0.00597569	0.0302445	0.0265026	0.0302445
JUP	ENST00000310706.9	1.78768e-10	5.35171e-08	0.71769	0.112516	7.22038	0.111718	0.0074082	0.0115816	0.0109497	0.0115816
TCP1	ENST00000543532.5	1.88411e-10	5.615e-08	0.947115	0.148672	5.65052	0.284352	0.0126668	0.0173706	0.0204882	0.0204882
FBN2	ENST00000262464.9	1.92961e-10	5.7248e-08	0.710797	0.11164	7.50557	0.172921	0.000718847	0.0179765	0.0103414	0.0179765
SYT6	ENST00000610096.1	2.11268e-10	6.18472e-08	5.59778	0.881135	2.60316	6.67381	0.741207	-0.418853	0.42339	0.42339
MED22	ENST00000610888.4	2.14493e-10	6.22405e-08	0.603801	0.095078	6.73317	0.0838251	0.000930352	0.00612353	0.0126294	0.0126294
MED22	ENST00000626118.2	2.14493e-10	6.22405e-08	0.603801	0.095078	6.73317	0.0838251	0.000930352	0.00612353	0.0126294	0.0126294
PWWP2B	ENST00000305233.6	2.50143e-10	7.16428e-08	1.09339	0.172817	5.03222	0.270767	0.0148896	0.00683112	0.0299088	0.0299088
NT5C3B	ENST00000523903.5	2.55973e-10	7.29964e-08	0.889234	0.140627	6.49618	0.174428	0.0159323	-0.00140722	0.0137318	0.0137318
NLGN4X	ENST00000538097.6	2.7389e-10	7.77706e-08	0.966318	0.153071	6.4625	0.195508	0.0212455	-0.00252305	0.0139006	0.0139006
POU5F1	ENST00000383524.4	3.08736e-10	8.61857e-08	0.622151	0.0988432	9.87124	0.081887	3.55576e-05	0.00166429	0.0146194	0.0146194
POU5F1	ENST00000437747.6	3.08736e-10	8.61857e-08	0.622151	0.0988432	9.87124	0.081887	3.55576e-05	0.00166429	0.0146194	0.0146194
CLSTN3	ENST00000266546.10	3.16345e-10	8.79387e-08	0.589078	0.0936449	7.08234	0.0773979	0.00181614	0.00554608	0.0113379	0.0113379
WAPL	ENST00000298767.10	3.49581e-10	9.59681e-08	0.708349	0.112884	7.85968	0.131897	0.00919729	0.00911976	0.00991689	0.00991689
UCHL1	ENST00000381760.8	3.48739e-10	9.59681e-08	1.01657	0.161992	6.54564	0.237723	0.00490706	0.0344552	0.0134906	0.0344552
GPR153	ENST00000377893.3	3.5314e-10	9.65445e-08	0.874217	0.139352	5.38487	0.164383	0.00497639	0.0172522	0.024152	0.024152
CACHD1	ENST00000651257.1	3.80946e-10	1.03292e-07	1.29515	0.206838	7.00166	0.369258	0.00912616	0.0550469	0.0115954	0.0550469
RPL35A	ENST00000485439.5	4.50385e-10	1.21128e-07	0.615984	0.0987869	6.95795	0.0883163	0.00289351	0.00993017	0.0117448	0.0117448
RHBDF1	ENST00000262316.10	5.30597e-10	1.4155e-07	0.853446	0.137436	6.21592	0.217279	0.0130405	0.0117725	0.0152924	0.0152924
SEMA6B	ENST00000586582.6	5.33563e-10	1.41769e-07	0.697336	0.112312	7.44193	0.141771	0.00138303	0.017538	0.0104556	0.017538
FXYD6	ENST00000526014.6	6.81466e-10	1.78912e-07	0.621136	0.100665	6.57133	0.0835069	0.00183196	0.00617795	0.0133682	0.0133682
LGALS3BP	ENST00000262776.8	7.15558e-10	1.8712e-07	0.802924	0.13029	5.89511	0.151209	0.00769889	0.0149049	0.0177642	0.0177642
CA11	ENST00000084798.9	7.2764e-10	1.8953e-07	1.38595	0.224993	6.17489	0.561602	0.00286242	0.0730706	0.0155585	0.0730706
H2AX	ENST00000375167.1	7.45309e-10	1.93371e-07	1.176	0.191028	5.759	0.412658	0.0355729	-0.00989313	0.0191648	0.0191648
LZTS3	ENST00000337576.6	7.6593e-10	1.97945e-07	1.05291	0.171155	6.8682	0.232297	0.0318668	-0.0147139	0.012074	0.012074
DNAJB6	ENST00000262177.9	7.71272e-10	1.9855e-07	0.621891	0.101109	8.76306	0.119947	0.000226314	0.0151081	0.0103761	0.0151081
SMG9	ENST00000601170.5	7.79311e-10	1.99842e-07	0.864801	0.140639	5.63644	0.172844	0.00899343	0.0161114	0.0206756	0.0206756
GPRC5B	ENST00000569479.5	8.26811e-10	2.11204e-07	0.718077	0.116956	7.29674	0.134594	0.00523966	0.0152786	0.0107619	0.0152786
ACTG1	ENST00000570382.1	1.00711e-09	2.54315e-07	6.15243	1.00723	3.45216	10.6522	1.36246	-0.0514854	0.159304	0.159304
PDPN	ENST00000510906.5	1.12877e-09	2.81808e-07	1.11354	0.182845	5.99386	0.27015	0.0146496	0.0354989	0.0168964	0.0354989
NOS1	ENST00000317775.11	1.183e-09	2.94237e-07	0.779176	0.128101	6.17903	0.150862	0.00339981	0.0212148	0.0155312	0.0212148
DPP7	ENST00000371579.7	1.32538e-09	3.25973e-07	0.846473	0.139583	5.64853	0.153994	0.00871076	0.0172814	0.0205145	0.0205145
HLA-A	ENST00000547271.2	1.35866e-09	3.32922e-07	0.770713	0.127174	7.23768	0.139539	0.0133544	-0.00420526	0.0109055	0.0109055
NMRK2	ENST00000168977.6	1.37029e-09	3.33772e-07	0.678717	0.112019	6.8964	0.100548	0.00220371	0.0166188	0.0119672	0.0166188
ECI1	ENST00000562238.5	1.47562e-09	3.56302e-07	0.742395	0.122771	6.1058	0.114148	0.0065736	0.00347199	0.0160354	0.0160354
TNFRSF12A	ENST00000326577.8	1.48918e-09	3.5827e-07	0.985094	0.162946	6.28334	0.344005	0.0192359	0.020591	0.0148793	0.020591
ATN1	ENST00000396684.3	1.54363e-09	3.70023e-07	1.04667	0.173297	6.8647	0.239633	0.0165014	0.0285466	0.0120875	0.0285466
RARRES2	ENST00000467793.5	1.60646e-09	3.82314e-07	0.802852	0.13307	5.83361	0.136363	0.00819658	0.0101048	0.0183649	0.0183649
COQ4	ENST00000300452.8	1.62933e-09	3.86368e-07	0.707624	0.117331	5.90251	0.116272	0.00295455	0.0133257	0.0176952	0.0176952
GSTP1	ENST00000398606.8	1.68443e-09	3.98006e-07	1.01052	0.167703	5.5407	0.214071	0.0202016	0.00676484	0.021985	0.021985
TMBIM1	ENST00000258412.8	1.71245e-09	4.03188e-07	0.649798	0.107887	6.57776	0.0911238	0.00412149	0.00470876	0.0133378	0.0133378
MSL1	ENST00000398532.8	1.73286e-09	4.06546e-07	0.658026	0.109288	6.90231	0.0961274	0.00597042	0.00732306	0.0119452	0.0119452
TMEM38A	ENST00000187762.7	1.80512e-09	4.22004e-07	0.735041	0.122213	5.79171	0.117484	0.00360006	0.0142109	0.0188039	0.0188039
KHSRP	ENST00000595223.5	1.82726e-09	4.24818e-07	2.01116	0.334498	4.98187	1.17776	0.136909	0.0299989	0.0309244	0.0309244
WDR1	ENST00000382452.6	1.86129e-09	4.30571e-07	0.765372	0.127361	7.33931	0.131939	0.0136659	0.0088734	0.0106654	0.0106654
TM7SF2	ENST00000279263.11	2.0154e-09	4.6138e-07	0.656758	0.109522	6.45444	0.0980869	0.00405114	0.00864646	0.0139416	0.0139416
RNF220	ENST00000355387.6	2.12995e-09	4.85922e-07	0.644569	0.107651	6.66647	0.0894324	0.00445506	0.0089614	0.0129281	0.0129281
CXXC1	ENST00000412036.6	2.14232e-09	4.87064e-07	0.826058	0.137984	6.26442	0.151523	0.0135669	-0.000265679	0.0149924	0.0149924
PRKCZ	ENST00000378567.8	2.20039e-09	4.98554e-07	0.621287	0.103855	6.88549	0.111219	0.00417048	0.00888539	0.0120082	0.0120082
NPIPB5	ENST00000517539.5	2.44991e-09	5.47588e-07	6.31791	1.05921	3.55312	9.48655	1.54175	-1.30336	0.141123	0.141123
REEP4	ENST00000306306.8	2.94396e-09	6.44941e-07	0.645061	0.108693	6.23842	0.13075	0.00257006	0.0132313	0.0151513	0.0151513
SCNN1A	ENST00000228916.7	3.17431e-09	6.84078e-07	0.705396	0.119108	7.31307	0.125084	0.0063797	0.0149004	0.0107242	0.0149004
SNX8	ENST00000222990.8	3.27503e-09	7.03492e-07	0.612892	0.103578	6.42623	0.0813168	0.0020057	0.0115663	0.014087	0.014087
C1RL	ENST00000266542.9	3.41296e-09	7.28392e-07	0.736985	0.124693	6.24225	0.119359	0.00287189	0.0204507	0.0151276	0.0204507
ZFHX2	ENST00000419474.5	3.54492e-09	7.54122e-07	0.674728	0.114281	6.19924	0.171097	0.00235844	0.0172316	0.0153991	0.0172316
EIF1	ENST00000482111.1	4.04976e-09	8.53288e-07	0.680122	0.115625	8.45807	0.104088	0.00269738	0.0173563	0.00997034	0.0173563
TPM4	ENST00000300933.8	4.30951e-09	9.05135e-07	1.0662	0.181579	7.02253	0.284098	0.0144359	0.0350205	0.0115266	0.0350205
P3H3	ENST00000290510.10	4.37295e-09	9.12663e-07	1.13852	0.193974	5.55272	0.314532	0.0239836	0.0324554	0.0218205	0.0324554
KMT5C	ENST00000255613.8	4.50578e-09	9.37429e-07	0.724071	0.123468	6.00459	0.137105	0.00605775	0.0108911	0.0168086	0.0168086
SSNA1	ENST00000459860.1	4.60228e-09	9.54503e-07	0.773327	0.131946	5.90182	0.196856	0.00841286	0.0110375	0.0177016	0.0177016
SLC45A3	ENST00000367145.4	4.71244e-09	9.74297e-07	0.742294	0.126736	5.88381	0.119384	0.00622204	0.00245807	0.0178709	0.0178709
KIAA1522	ENST00000373481.7	4.77897e-09	9.84973e-07	0.776482	0.132626	7.81999	0.145844	0.00634044	0.0200439	0.00994721	0.0200439
DOT1L	ENST00000457590.2	4.94824e-09	1.01355e-06	0.8018	0.137086	5.89177	0.150234	0.00590153	0.0222871	0.0177956	0.0222871
FOXH1	ENST00000377317.4	5.16599e-09	1.05206e-06	0.606454	0.103814	8.0295	0.0956344	0.000367042	0.015799	0.00983489	0.015799
ASTN1	ENST00000361833.7	5.7844e-09	1.16321e-06	0.78454	0.134734	5.56854	0.149667	0.00562613	0.00654559	0.0216038	0.0216038
MPP1	ENST00000413259.7	6.10313e-09	1.21989e-06	4.22252	0.726279	2.25069	4.99555	0.201662	-0.0779017	0.58956	0.58956
MRTFA	ENST00000355630.8	6.74378e-09	1.33185e-06	0.618377	0.106669	7.02173	0.0901376	0.0055381	0.00978832	0.0115292	0.0115292
HOMER3	ENST00000392351.8	6.98066e-09	1.36692e-06	0.88444	0.152716	5.56716	0.18599	0.0133608	-0.0102919	0.0216227	0.0216227
TAX1BP1	ENST00000433216.6	6.98333e-09	1.36692e-06	5.42871	0.937387	3.45266	7.71108	1.15883	-0.863432	0.159207	0.159207
EIF4EBP1	ENST00000338825.5	7.00789e-09	1.36768e-06	0.607224	0.104861	7.89033	0.0987568	0.000929963	0.0155639	0.00989638	0.0155639
HMCN2	ENST00000624552.3	7.34531e-09	1.42931e-06	1.52959	0.264506	5.5778	0.536642	0.0064017	0.0985433	0.0214771	0.0985433
FAAP20	ENST00000378546.9	7.40444e-09	1.43659e-06	0.743063	0.128525	5.88202	0.153196	0.00688997	0.00191733	0.0178879	0.0178879
IRF2BPL	ENST00000238647.5	7.74923e-09	1.4889e-06	0.865354	0.149875	8.03539	0.200014	0.000386082	0.0333079	0.00983343	0.0333079
ZIC3	ENST00000370606.3	7.76406e-09	1.4889e-06	0.892973	0.154667	5.3782	0.187906	0.0116358	0.0183804	0.0242472	0.0242472
CXCL3	ENST00000296026.4	7.82236e-09	1.49574e-06	1.19762	0.207479	4.5877	0.317855	0.0147031	0.0498682	0.0423553	0.0498682
RPL8	ENST00000528957.5	7.90153e-09	1.50653e-06	0.681572	0.118112	7.27894	0.117352	0.0101217	0.00478578	0.010804	0.010804
RHBDD3	ENST00000216085.12	8.05042e-09	1.52138e-06	0.999071	0.173227	6.02887	0.231302	0.00740956	0.037602	0.0166143	0.037602
HTR7	ENST00000336152.8	8.3983e-09	1.56958e-06	0.868976	0.150857	6.0963	0.184127	0.0131987	0.0209381	0.016104	0.0209381
TP53I13	ENST00000301057.8	8.46064e-09	1.57678e-06	0.785303	0.136361	5.69736	0.17826	0.0047883	0.023103	0.0198916	0.023103
NDUFS7	ENST00000233627.14	9.19303e-09	1.68947e-06	0.586495	0.102088	6.48588	0.082103	0.00185002	0.0048978	0.013783	0.013783
CD276	ENST00000318443.10	9.86093e-09	1.79724e-06	0.653256	0.113945	7.6724	0.141288	0.00593015	0.0135449	0.0100977	0.0135449
BRI3	ENST00000297290.3	9.85197e-09	1.79724e-06	0.63334	0.110468	6.69867	0.0958327	0.00158946	0.0167152	0.012783	0.0167152
FAM171A2	ENST00000293443.11	1.0498e-08	1.90287e-06	0.687812	0.120195	5.88558	0.106165	0.00337907	0.0182911	0.017854	0.0182911
LRRC14	ENST00000292524.6	1.0966e-08	1.98226e-06	0.744845	0.13033	5.8986	0.13996	0.00774737	0.0168688	0.0177315	0.0177315
PGAP6	ENST00000250930.7	1.11053e-08	1.99654e-06	0.587785	0.102887	6.92312	0.0891925	0.00400969	-0.000540327	0.0118689	0.0118689
BRSK1	ENST00000309383.5	1.11964e-08	2.00746e-06	0.942587	0.165032	6.54191	0.237773	0.0273449	0.00830588	0.0135086	0.0135086
NPRL3	ENST00000399953.7	1.14535e-08	2.04801e-06	0.777902	0.136291	6.43838	0.145738	0.0104809	0.0173819	0.014024	0.0173819
SLC37A2	ENST00000354617.5	1.16643e-08	2.08008e-06	0.783988	0.137432	5.4669	0.145363	0.00533031	0.00814285	0.0230009	0.0230009
EFR3A	ENST00000254624.10	1.2118e-08	2.13225e-06	1.17685	0.206535	7.56947	0.307938	0.0123391	0.0516461	0.0102386	0.0516461
TNFSF11	ENST00000398795.7	1.22386e-08	2.14208e-06	0.768836	0.13497	5.64338	0.149824	0.00674241	0.0203636	0.0205828	0.0205828
CRTC1	ENST00000594658.5	1.22111e-08	2.14208e-06	0.863834	0.151636	5.81919	0.276935	0.0146834	0.0198069	0.0185132	0.0198069
WBP1	ENST00000233615.7	1.27321e-08	2.20948e-06	0.615702	0.108215	6.52178	0.0749677	0.00395969	0.00104176	0.013606	0.013606
RHOA	ENST00000431929.2	1.27573e-08	2.20948e-06	1.0399	0.182782	4.80542	0.261662	0.0149799	-0.0108009	0.0351339	0.0351339
CENPV	ENST00000299736.5	1.31022e-08	2.25154e-06	0.624188	0.109801	6.37605	0.0756445	0.00373036	-0.000356029	0.014354	0.014354
OTX2	ENST00000339475.9	1.34839e-08	2.31112e-06	0.703701	0.123895	6.66834	0.117997	0.00162699	0.021398	0.0129196	0.021398
VARS1	ENST00000435657.6	1.44163e-08	2.45189e-06	0.82239	0.145084	6.74882	0.190444	0.0190129	-0.00283064	0.0125612	0.0125612
VARS1	ENST00000422694.6	1.44163e-08	2.45189e-06	0.82239	0.145084	6.74882	0.190444	0.0190129	-0.00283064	0.0125612	0.0125612
PCBP2	ENST00000550520.6	1.47162e-08	2.49008e-06	1.17574	0.207551	6.66156	0.339879	0.0288251	0.0357909	0.0129504	0.0357909
ABCD4	ENST00000553486.5	1.46998e-08	2.49008e-06	1.01405	0.179002	5.75543	0.252403	0.0288574	0.00828414	0.0192052	0.0192052
SBNO2	ENST00000361757.8	1.53715e-08	2.57464e-06	0.967322	0.170985	6.8638	0.234936	0.0253445	0.0185092	0.012091	0.0185092
NQO2	ENST00000397717.6	1.60272e-08	2.67768e-06	0.961107	0.170102	5.46958	0.209776	0.0118356	0.0315663	0.0229638	0.0315663
HLA-A	ENST00000639891.1	1.68829e-08	2.79244e-06	1.05642	0.187267	5.31319	0.249871	0.0220403	0.0305632	0.0251923	0.0305632
ADGRL1	ENST00000361434.7	1.78372e-08	2.91385e-06	0.746271	0.132511	7.78105	0.169515	0.00158625	0.0247525	0.00998113	0.0247525
PTMA	ENST00000409683.5	1.78047e-08	2.91385e-06	3.20963	0.569884	6.60611	2.76179	0.473946	-0.344534	0.0132051	0.0132051
EVL	ENST00000392920.8	1.85271e-08	3.0191e-06	0.667152	0.1186	6.85351	0.0997342	0.00217619	0.0189228	0.0121309	0.0189228
GNAS	ENST00000488546.5	1.97164e-08	3.18155e-06	0.939965	0.167418	6.9455	0.177285	0.0302547	-0.0156652	0.0117886	0.0117886
ADAMTS16	ENST00000274181.7	2.02277e-08	3.25611e-06	0.740824	0.132053	6.01317	0.127606	0.0071103	0.0190468	0.0167392	0.0190468
FEZ1	ENST00000278919.7	2.05883e-08	3.30612e-06	1.18953	0.212151	6.28969	0.405332	0.00245424	0.0650576	0.0148418	0.0650576
PUM1	ENST00000426105.6	2.08594e-08	3.33347e-06	6.05096	1.07962	3.39915	9.59779	1.57822	-1.34643	0.170143	0.170143
ZNF736	ENST00000423484.3	2.45791e-08	3.87179e-06	0.756745	0.135709	6.19139	0.137167	0.00290825	0.0247172	0.0154501	0.0247172
CD36	ENST00000447544.7	2.65611e-08	4.15434e-06	2.55627	0.459536	3.34934	1.32861	0.135607	-0.0719789	0.181153	0.181153
PHF1	ENST00000495185.5	2.72898e-08	4.24822e-06	1.27156	0.228781	4.84563	0.338819	0.0444402	-0.0230608	0.0340708	0.0340708
DAPK1	ENST00000622514.4	2.86531e-08	4.43956e-06	5.9315	1.06884	3.49229	8.4084	1.56193	-1.37756	0.151696	0.151696
CNTN1	ENST00000348761.2	3.00811e-08	4.61756e-06	0.668195	0.120592	6.63661	0.111519	0.00372942	0.0180842	0.0130642	0.0180842
FKBP1A	ENST00000614856.1	3.09324e-08	4.70457e-06	0.754953	0.13637	5.54188	0.141324	0.0059262	0.0172728	0.0219689	0.0219689
MLYCD	ENST00000262430.6	3.22536e-08	4.87191e-06	0.873187	0.157936	5.13583	0.162596	0.0094047	0.0155169	0.028011	0.028011
TKFC	ENST00000529479.5	3.3525e-08	5.04094e-06	0.801353	0.145121	5.49312	0.153601	0.00895168	0.0110411	0.0226386	0.0226386
TMEM200C	ENST00000383490.2	3.52792e-08	5.25692e-06	1.70847	0.309898	3.8995	0.611407	0.051244	0.0249975	0.0928114	0.0928114
PGAP3	ENST00000300658.9	3.61141e-08	5.35719e-06	0.820714	0.14898	5.87749	0.144083	0.0153616	0.00309379	0.0179312	0.0179312
GTF2IP1	ENST00000616377.4	3.8735e-08	5.69491e-06	1.0314	0.187646	6.23649	0.234059	0.0376534	0.00571584	0.0151633	0.0151633
ZMIZ2	ENST00000265346.11	3.88517e-08	5.6994e-06	0.738071	0.134293	6.49002	0.118625	0.0132894	0.00868977	0.0137623	0.0137623
FARP1	ENST00000627049.2	3.91885e-08	5.73608e-06	0.715417	0.130207	7.82284	0.121292	0.0110501	0.0143806	0.00994489	0.0143806
EIF3F	ENST00000528653.1	4.01787e-08	5.84225e-06	0.719066	0.130976	5.60222	0.137137	0.0045892	0.00436315	0.0211428	0.0211428
NA	ENST00000626931.1	4.01787e-08	5.84225e-06	0.719066	0.130976	5.60222	0.137137	0.0045892	0.00436315	0.0211428	0.0211428
TESMIN	ENST00000255087.10	4.04567e-08	5.86976e-06	0.691714	0.126022	5.87324	0.118775	0.0058501	0.00986182	0.0179721	0.0179721
HID1	ENST00000425042.7	4.08812e-08	5.91838e-06	0.620613	0.113106	6.06327	0.0995647	0.00284072	0.0103199	0.0163488	0.0163488
MSI1	ENST00000257552.7	4.2878e-08	6.1536e-06	0.653459	0.119275	6.75928	0.0966813	0.0012821	0.0200579	0.0125162	0.0200579
ACOT8	ENST00000217455.9	4.39739e-08	6.28362e-06	0.701273	0.128107	5.87899	0.103293	0.0067004	0.00455556	0.0179169	0.0179169
MZT2B	ENST00000281871.10	4.48717e-08	6.38432e-06	0.708666	0.129543	5.99012	0.113599	0.00824465	0.0150766	0.0169273	0.0169273
DTX3	ENST00000337737.8	4.72123e-08	6.68858e-06	0.810141	0.148337	6.14207	0.145677	0.0172253	0.0107824	0.0157804	0.0157804
ATG4D	ENST00000309469.9	4.96435e-08	6.94379e-06	0.653367	0.119827	6.47362	0.110467	0.00769337	0.00896686	0.0138444	0.0138444
SPHK2	ENST00000599748.5	4.99685e-08	6.9745e-06	0.723992	0.132808	6.10298	0.116613	0.0104013	-0.00450535	0.0160557	0.0160557
GSTT1	ENST00000612885.3	5.14099e-08	7.14554e-06	0.743684	0.136547	5.73929	0.14023	0.00857723	0.0107034	0.0193903	0.0193903
SIPA1L1	ENST00000537413.5	5.19226e-08	7.18662e-06	0.881363	0.161878	6.04783	0.176596	0.0228404	0.0111975	0.0164665	0.0164665
DRD4	ENST00000611962.2	5.9885e-08	8.2199e-06	2.11799	0.390834	3.93011	1.01305	0.0901121	0.139015	0.0893884	0.139015
PCDH1	ENST00000394536.4	6.22363e-08	8.50734e-06	0.675414	0.124793	7.91387	0.170587	0.00327969	0.0200804	0.00988234	0.0200804
AUTS2	ENST00000647140.1	6.60963e-08	9.01636e-06	1.44792	0.26806	5.58718	0.628029	0.0572151	0.0505693	0.0213488	0.0505693
MFHAS1	ENST00000644336.1	6.63744e-08	9.0171e-06	1.03005	0.190725	4.676	0.253974	0.0154764	0.0229918	0.0390879	0.0390879
MFHAS1	ENST00000644614.1	6.63744e-08	9.0171e-06	1.03005	0.190725	4.676	0.253974	0.0154764	0.0229918	0.0390879	0.0390879
SFRP1	ENST00000220772.8	6.65913e-08	9.02804e-06	1.25809	0.232974	8.84443	0.569514	0.000952888	0.0804626	0.010531	0.0804626
PTPRA	ENST00000399903.6	7.07774e-08	9.51755e-06	0.663729	0.123159	6.7761	0.0989617	0.0103076	0.0113688	0.0124447	0.0124447
PPP2CA	ENST00000231504.5	7.68622e-08	1.01908e-05	0.611135	0.113713	6.21893	0.0893309	0.00412278	0.00879492	0.0152733	0.0152733
TYRO3	ENST00000263798.8	7.82218e-08	1.03091e-05	0.752334	0.140069	5.86001	0.125613	0.011328	0.0128394	0.0181009	0.0181009
KCTD1	ENST00000580059.6	8.30806e-08	1.08844e-05	0.680308	0.126916	5.75016	0.0994058	0.00489622	0.0104399	0.0192652	0.0192652
FZD8	ENST00000374694.2	9.23038e-08	1.18349e-05	0.850067	0.159151	4.99298	0.146428	0.0072993	0.00416794	0.0306943	0.0306943
FAM71E1	ENST00000600100.5	9.21497e-08	1.18349e-05	1.22127	0.228636	4.40613	0.304161	0.0274365	-0.0202779	0.0509749	0.0509749
HIF3A	ENST00000377670.8	9.55392e-08	1.2179e-05	0.647835	0.121431	6.68929	0.122584	0.00166119	0.020457	0.0128251	0.020457
SNTG2	ENST00000308624.10	9.99601e-08	1.26812e-05	0.945954	0.177584	4.90976	0.210506	0.0147946	0.0116815	0.0325095	0.0325095
PABPC1	ENST00000522387.5	1.03556e-07	1.30749e-05	0.898019	0.168789	6.29334	0.184242	0.0254857	0.0172488	0.0148204	0.0172488
CNDP2	ENST00000324262.9	1.05551e-07	1.32762e-05	0.697001	0.131092	5.82009	0.112615	0.00727374	0.017427	0.0185038	0.0185038
NA	ENST00000647597.1	1.08842e-07	1.36124e-05	0.744292	0.140133	7.94109	0.126508	0.0166087	0.0128474	0.00986796	0.0128474
PNMA6A	ENST00000421798.4	1.09049e-07	1.36126e-05	0.997266	0.187775	4.82026	0.226272	0.0099783	0.0429109	0.0347334	0.0429109
SF1	ENST00000486867.1	1.097e-07	1.36681e-05	0.995052	0.187396	5.26316	0.248516	0.0267303	-0.0168105	0.0259458	0.0259458
NTPCR	ENST00000366628.10	1.12322e-07	1.39423e-05	0.65138	0.122773	5.81246	0.0985175	0.00402647	0.0174079	0.0185833	0.0185833
MEX3C	ENST00000406189.4	1.13016e-07	1.39911e-05	0.896441	0.168998	6.8996	0.206543	0.00553991	0.0373006	0.0119553	0.0373006
CLUHP3	ENST00000562354.2	1.18357e-07	1.45324e-05	0.739057	0.13955	5.40191	0.154582	0.00510407	0.0241071	0.0239101	0.0241071
MFSD14C	ENST00000645073.1	1.18614e-07	1.45324e-05	4.16784	0.787036	2.11606	4.46228	0.266078	-0.237227	0.66306	0.66306
TBC1D22A	ENST00000394449.6	1.21222e-07	1.47688e-05	5.166	0.976257	2.84749	7.04677	1.09816	-0.961841	0.331455	0.331455
ARHGEF10	ENST00000521927.1	1.21436e-07	1.47688e-05	4.08466	0.771954	2.13551	4.5591	0.241839	-0.189103	0.65203	0.65203
ARHGEF10	ENST00000631992.1	1.21436e-07	1.47688e-05	4.08466	0.771954	2.13551	4.5591	0.241839	-0.189103	0.65203	0.65203
POLR2M	ENST00000649091.1	1.24615e-07	1.51276e-05	4.32455	0.818022	2.21629	4.43696	0.395966	-0.315278	0.607774	0.607774
GATD3B	ENST00000620528.4	1.30009e-07	1.56389e-05	0.794176	0.150445	6.44611	0.171242	0.0199665	-0.00914699	0.0139842	0.0139842
CDK13	ENST00000340829.10	1.31257e-07	1.57318e-05	0.797304	0.151088	6.5276	0.15506	0.00854517	0.0256962	0.0135777	0.0256962
AGRN	ENST00000620552.4	1.31062e-07	1.57318e-05	0.640529	0.121373	7.35562	0.0984329	0.0114673	0.00475516	0.0106299	0.0106299
NDUFV3	ENST00000354250.7	1.38771e-07	1.66024e-05	0.678523	0.128829	6.9037	0.114779	0.0129551	0.0117516	0.0119401	0.0119401
LRIG1	ENST00000383703.3	1.52489e-07	1.78877e-05	1.12987	0.215232	5.70462	0.33709	0.0194081	0.0500791	0.0198027	0.0500791
NA	ENST00000633161.1	1.52489e-07	1.78877e-05	1.12987	0.215232	5.70462	0.33709	0.0194081	0.0500791	0.0198027	0.0500791
SHC2	ENST00000264554.10	1.58354e-07	1.85101e-05	1.68498	0.321404	4.37937	0.649923	0.0370046	0.117946	0.0524886	0.117946
DPPA4	ENST00000495679.5	1.61569e-07	1.87864e-05	0.845308	0.161353	7.01986	0.207512	0.00495909	0.0340932	0.0115353	0.0340932
ARFRP1	ENST00000618838.4	1.64514e-07	1.90617e-05	0.994408	0.189935	5.55726	0.284795	0.0308551	0.0232576	0.0217583	0.0232576
[truncated: 1,147 more rows]

## Sheet: M, WT v RNF20 Het1, WT up 
ext_gene	target_id	pval	qval	b	se_b	mean_obs	var_obs	tech_var	sigma_sq	smooth_sigma_sq	final_sigma_sq
[truncated: 329 more rows]

## Sheet: M, WT v RNF20 Het1, WT down
ext_gene	target_id	pval	qval	b	se_b	mean_obs	var_obs	tech_var	sigma_sq	smooth_sigma_sq	final_sigma_sq
[truncated: 618 more rows]

[truncated: 3 more sheets: M, WT v RNF20 Het2, WT up, M, WT v RNF20 Het2, WT down, Read Summary]
