# Supplementary material for: Dynamic tissue-specific H2Bub1 is required for human and mouse cardiogenesis
Source: Research Square preprint supplement (doi:10.21203/rs.3.rs-1498907/v1), 2022-04-01
Supplement: Supplementary file 4 [file 87c4d06b3ad23463f0888c48.xlsx]

## Sheet: Cluster Identities
Chromosome	Start	End	Name	Cluster
chr12	120725825	120740008	NM_000017	Cluster1
chr11	108121566	108147601	NM_000019	Cluster1
chr14	73136506	73223691	NM_000021	Cluster1
chr17	50166004	50175928	NM_000023	Cluster1
chr22	40346499	40369367	NM_000026	Cluster1
chr1	230702522	230714122	NM_000029	Cluster1
chr2	240868823	240880500	NM_000030	Cluster1
chr9	113386311	113401284	NM_000031	Cluster1
chr9	101420559	101435774	NM_000035	Cluster1
chr1	114673098	114695618	NM_000036	Cluster1
chr7	66075818	66093573	NM_000048	Cluster1
chr9	130444706	130501274	NM_000050	Cluster1
chr13	51932670	52011450	NM_000053	Cluster1
chr6	80106609	80346270	NM_000056	Cluster1
chr15	90717345	90816166	NM_000057	Cluster1
chr11	57597684	57614848	NM_000062	Cluster1
chr6	31927716	31945672	NM_000063	Cluster1
chr19	13206442	13506479	NM_000068	Cluster1
chr1	201039511	201112426	NM_000069	Cluster1
chr11	118344343	118355161	NM_000073	Cluster1
chr2	174747594	174764472	NM_000079	Cluster1
chr5	60866453	60945070	NM_000082	Cluster1
chr7	143316110	143352083	NM_000083	Cluster1
chr1	16043781	16057308	NM_000085	Cluster1
chr16	28477278	28492082	NM_000086	Cluster1
chr17	50184100	50201631	NM_000088	Cluster1
chr3	48564072	48595160	NM_000094	Cluster1
chr1	53196823	53214197	NM_000098	Cluster1
chr15	51208056	51338596	NM_000103	Cluster1
chr11	47214973	47239217	NM_000107	Cluster1
chr7	107891182	107921198	NM_000108	Cluster1
chr9	129812941	129824136	NM_000113	Cluster1
chr9	127815011	127854773	NM_000118	Cluster1
chr15	43197227	43221018	NM_000119	Cluster1
chr1	225825353	225845561	NM_000120	Cluster1
chr2	127257289	127294144	NM_000122	Cluster1
chr15	76215352	76311469	NM_000126	Cluster1
chr8	117794489	118111826	NM_000127	Cluster1
chr16	89737548	89816647	NM_000135	Cluster1
chr15	80152998	80186349	NM_000137	Cluster1
chr18	57544376	57586702	NM_000140	Cluster1
chr10	121478331	121598444	NM_000141	Cluster1
chr4	1793311	1808872	NM_000142	Cluster1
chr9	69035751	69079076	NM_000144	Cluster1
chr1	23845080	23868369	NM_000147	Cluster1
chr17	80101580	80119881	NM_000152	Cluster1
chr19	12891159	12899999	NM_000159	Cluster1
chr17	81804149	81814008	NM_000160	Cluster1
chr7	44144275	44189439	NM_000162	Cluster1
chr6	121435645	121449727	NM_000165	Cluster1
chr9	6532466	6645729	NM_000170	Cluster1
chr5	151822512	151924851	NM_000171	Cluster1
chr19	34365195	34402413	NM_000175	Cluster1
chr9	121299830	121332842	NM_000177	Cluster1
chr20	34928431	34955806	NM_000178	Cluster1
chr2	47783144	47806953	NM_000179	Cluster1
chr17	8002614	8020342	NM_000180	Cluster1
chr7	65960685	65982213	NM_000181	Cluster1
chr2	26190634	26244632	NM_000182	Cluster1
chr2	26244938	26290465	NM_000183	Cluster1
chr22	20774112	20787720	NM_000185	Cluster1
chr10	69318846	69401881	NM_000188	Cluster1
chr2	74834126	74893358	NM_000189	Cluster1
chr11	119084880	119093549	NM_000190	Cluster1
chr1	23801884	23825429	NM_000191	Cluster1
chr10	98416197	98446935	NM_000195	Cluster1
chr17	80209275	80220333	NM_000199	Cluster1
chr19	10271119	10286615	NM_000201	Cluster1
chr4	987043	1004564	NM_000203	Cluster1
chr19	7112264	7294414	NM_000208	Cluster1
chr2	172427585	172506458	NM_000210	Cluster1
chr21	44885953	44920899	NM_000211	Cluster1
chr17	75721458	75757818	NM_000213	Cluster1
chr11	2445007	2849105	NM_000218	Cluster1
chr21	34446689	34512210	NM_000219	Cluster1
chr2	27086771	27100762	NM_000221	Cluster1
chr7	128241277	128257629	NM_000230	Cluster1
chr19	48115444	48170344	NM_000234	Cluster1
chr16	3242026	3256633	NM_000243	Cluster1
chr16	10877197	10924983	NM_000246	Cluster1
chr6	31403594	31415315	NM_000247	Cluster1
chr17	58269854	58280935	NM_000250	Cluster1
chr2	47403155	47483223	NM_000251	Cluster1
chr1	236795280	236903981	NM_000254	Cluster1
chr11	47331405	47352702	NM_000256	Cluster1
chr14	23412739	23435660	NM_000257	Cluster1
chr15	52307283	52529050	NM_000259	Cluster1
chr11	77128245	77215241	NM_000260	Cluster1
chr22	42058333	42070812	NM_000262	Cluster1
chr7	74773961	74789376	NM_000265	Cluster1
chr17	51153558	51162089	NM_000269	Cluster1
chr18	23531441	23586506	NM_000271	Cluster1
chr10	124397302	124418923	NM_000274	Cluster1
chr13	100089092	100530434	NM_000282	Cluster1
chr4	625573	670892	NM_000283	Cluster1
chr19	33386949	33521791	NM_000285	Cluster1
chr6	42963865	42979181	NM_000287	Cluster1
chr12	48119363	48146404	NM_000289	Cluster1
chr16	30748424	30761176	NM_000294	Cluster1
chr14	94376746	94388602	NM_000295	Cluster1
chr16	2088707	2135898	NM_000296	Cluster1
chr4	88007634	88077777	NM_000297	Cluster1
chr1	201283451	201332993	NM_000299	Cluster1
chr1	11934716	11975537	NM_000302	Cluster1
chr16	8797838	8849325	NM_000303	Cluster1
chr1	40072711	40097252	NM_000310	Cluster1
chr2	127418426	127429242	NM_000312	Cluster1
chr4	17486394	17512090	NM_000320	Cluster1
chr6	42696599	42722597	NM_000322	Cluster1
chr15	89209868	89221579	NM_000326	Cluster1
chr3	63864533	64003460	NM_000333	Cluster1
chr17	63938553	63972918	NM_000334	Cluster1
chr3	38548061	38649687	NM_000335	Cluster1
chr16	23302301	23381294	NM_000336	Cluster1
chr16	56865206	56915850	NM_000339	Cluster1
chr17	44248389	44268135	NM_000342	Cluster1
chr5	70049522	70077591	NM_000344	Cluster1
chr5	70924940	70953011	NM_000344_r1	Cluster1
chr11	17392884	17476845	NM_000352	Cluster1
chr16	71565659	71577092	NM_000353	Cluster1
chr22	30607173	30627271	NM_000355	Cluster1
chr5	150357696	150400293	NM_000356	Cluster1
chr5	136028987	136063818	NM_000358	Cluster1
chr14	24249113	24263177	NM_000359	Cluster1
chr22	32801704	32863041	NM_000362	Cluster1
chr9	132891348	132944616	NM_000368	Cluster1
chr3	124730451	124749272	NM_000373	Cluster1
chr10	125788585	125823258	NM_000375	Cluster1
chr12	47841536	47904994	NM_000376	Cluster1
chr2	31334320	31414742	NM_000379	Cluster1
chr17	19648750	19677596	NM_000382	Cluster1
chr21	44285875	44298648	NM_000383	Cluster1
chr3	122183667	122291628	NM_000388	Cluster1
chr6	36678713	36687332	NM_000389	Cluster1
chr22	42617839	42649392	NM_000398	Cluster1
chr19	45349836	45370573	NM_000400	Cluster1
chr11	44096196	44245430	NM_000401	Cluster1
chr3	32996616	33097146	NM_000404	Cluster1
chr5	151253184	151270439	NM_000405	Cluster1
chr6	137197484	137219385	NM_000416	Cluster1
chr10	6010691	6062367	NM_000417	Cluster1
chr17	44372180	44389649	NM_000419	Cluster1
chr14	74498182	74612237	NM_000428	Cluster1
chr10	80271819	80289658	NM_000429	Cluster1
chr17	2593653	2685615	NM_000430	Cluster1
chr12	109573793	109598125	NM_000431	Cluster1
chr12	110910844	110920579	NM_000432	Cluster1
chr19	15159037	15200995	NM_000435	Cluster1
chr1	25959766	25998063	NM_000437	Cluster1
chr5	149857952	149944793	NM_000440	Cluster1
chr8	143915152	143976745	NM_000445	Cluster1
chr1	226870615	226896098	NM_000447	Cluster1
chr11	36568006	36579760	NM_000448	Cluster1
chr19	17871944	17895174	NM_000453	Cluster1
chr19	1205777	1228431	NM_000455	Cluster1
chr12	55997275	56005525	NM_000456	Cluster1
chr20	44401255	44432845	NM_000457	Cluster1
chr15	25337233	25439056	NM_000462	Cluster1
chr2	233760269	233773300	NM_000463	Cluster1
chr7	92487024	92528520	NM_000466	Cluster1
chr9	127866479	127877743	NM_000476	Cluster1
chr1	21509422	21578410	NM_000478	Cluster1
chr11	10450690	10507579	NM_000480	Cluster1
chr21	25880549	26170770	NM_000484	Cluster1
chr1	173903803	173917378	NM_000488	Cluster1
chr22	25219638	25231869	NM_000496	Cluster1
chr7	74028172	74069906	NM_000501	Cluster1
chr17	58192725	58205174	NM_000502	Cluster1
chr13	113122798	113149529	NM_000504	Cluster1
chr11	46719212	46739506	NM_000506	Cluster1
chr19	48695970	48705951	NM_000511	Cluster1
chr16	88813733	88856947	NM_000512	Cluster1
chr15	72340923	72376014	NM_000520	Cluster1
chr5	74685232	74721288	NM_000521	Cluster1
chr19	11089462	11133820	NM_000527	Cluster1
chr19	12646511	12666742	NM_000528	Cluster1
chr18	13882043	13915536	NM_000529	Cluster1
chr3	136250339	136330169	NM_000532	Cluster1
chr1	204154818	204166337	NM_000537	Cluster1
chr19	38433690	38587564	NM_000540	Cluster1
chr2	233307815	233347055	NM_000541	Cluster1
chr2	85657313	85668199	NM_000542	Cluster1
chr6	32825409	32838770	NM_000544	Cluster1
chr17	7668401	7687550	NM_000546	Cluster1
chr2	1413460	1542727	NM_000547	Cluster1
chr16	2047984	2089490	NM_000548	Cluster1
chr3	10141777	10153666	NM_000551	Cluster1
chr12	5948873	6124675	NM_000552	Cluster1
chr8	31033809	31176137	NM_000553	Cluster1
chr2	113117970	113134014	NM_000577	Cluster1
chr2	216633419	216664435	NM_000597	Cluster1
chr10	44370164	44385097	NM_000609	Cluster1
chr11	33703009	33736423	NM_000611	Cluster1
chr11	6431048	6440987	NM_000613	Cluster1
chr12	6789527	6820799	NM_000616	Cluster1
chr12	50985991	51026384	NM_000617	Cluster1
chr12	117208141	117361626	NM_000620	Cluster1
chr14	96204797	96244329	NM_000623	Cluster1
chr14	94581425	94593118	NM_000624	Cluster1
chr21	33324969	33359864	NM_000629	Cluster1
chr22	36861005	36878015	NM_000631	Cluster1
chr8	30678065	30727846	NM_000637	Cluster1
chr19	41330322	41353922	NM_000660	Cluster1
chr16	8712968	8784575	NM_000663	Cluster1
chr4	99070978	99088788	NM_000671	Cluster1
chr1	203127725	203167405	NM_000674	Cluster1
chr22	24427598	24442357	NM_000675	Cluster1
chr17	15944916	15975896	NM_000676	Cluster1
chr20	4220629	4249287	NM_000678	Cluster1
chr5	159916481	159973012	NM_000679	Cluster1
chr20	34280267	34303355	NM_000687	Cluster1
chr3	52198159	52214327	NM_000688	Cluster1
chr12	111766932	111817531	NM_000690	Cluster1
chr17	19737988	19748298	NM_000691	Cluster1
chr15	100879830	100916625	NM_000693	Cluster1
chr11	68010326	68029276	NM_000694	Cluster1
chr17	6996048	7010754	NM_000697	Cluster1
chr10	45374215	45446115	NM_000698	Cluster1
chr1	116373243	116404774	NM_000701	Cluster1
chr1	160115758	160143584	NM_000702	Cluster1
chr19	35550030	35563658	NM_000704	Cluster1
chr13	113648805	113658198	NM_000705	Cluster1
chr1	206106936	206117388	NM_000707	Cluster1
chr19	41397817	41425002	NM_000709	Cluster1
chr19	40447767	40465745	NM_000713	Cluster1
chr22	43151558	43163242	NM_000714	Cluster1
chr9	137877781	138124617	NM_000718	Cluster1
chr17	39173452	39197669	NM_000723	Cluster1
chr12	48818495	48828941	NM_000725	Cluster1
chr2	151832770	152099167	NM_000726	Cluster1
chr17	67044553	67056795	NM_000727	Cluster1
chr11	62908678	62921363	NM_000738	Cluster1
chr20	63343309	63361396	NM_000744	Cluster1
chr15	30357765	30377111	NM_000746_r1	Cluster1
chr17	7445060	7457710	NM_000747	Cluster1
chr1	154567777	154580010	NM_000748	Cluster1
chr15	78624110	78641210	NM_000750	Cluster1
chr2	232526159	232536664	NM_000751	Cluster1
chr9	129094793	129110793	NM_000755	Cluster1
chr1	109910848	109930992	NM_000757	Cluster1
chr1	36466042	36482913	NM_000760	Cluster1
chr7	99705035	99735196	NM_000765	Cluster1
chr10	94762680	94855547	NM_000769	Cluster1
chr10	133527362	133539123	NM_000773	Cluster1
chr19	41114431	41128381	NM_000774	Cluster1
chr7	99648193	99679996	NM_000777	Cluster1
chr1	46929187	46941476	NM_000778	Cluster1
chr1	46799045	46819413	NM_000779	Cluster1
chr7	92112155	92134477	NM_000786	Cluster1
chr9	133636362	133659329	NM_000787	Cluster1
chr17	63477060	63498373	NM_000789	Cluster1
chr1	53894186	53911086	NM_000792	Cluster1
chr11	113409604	113475398	NM_000795	Cluster1
chr20	1368977	1393054	NM_000801	Cluster1
chr15	26867061	26949208	NM_000810	Cluster1
chr1	2019344	2030758	NM_000815	Cluster1
chr21	33503932	33542117	NM_000819	Cluster1
chr13	113820548	113864076	NM_000820	Cluster1
chr2	85544719	85561493	NM_000821	Cluster1
chr7	30963952	30979528	NM_000823	Cluster1
chr9	137139153	137168756	NM_000832	Cluster1
chr17	74842022	74859885	NM_000835	Cluster1
chr3	51707067	51718609	NM_000839	Cluster1
chr5	178978328	178995320	NM_000843	Cluster1
chr1	228140278	228148984	NM_000858	Cluster1
chr3	11252698	11263253	NM_000861	Cluster1
chr11	113975107	113990312	NM_000869	Cluster1
chr1	19664874	19680966	NM_000871	Cluster1
chr15	98648538	98964530	NM_000875	Cluster1
chr6	159969098	160111502	NM_000876	Cluster1
chr2	102142745	102179874	NM_000877	Cluster1
chr22	37125842	37149916	NM_000878	Cluster1
chr7	128392276	128409982	NM_000883	Cluster1
chr16	31355175	31382999	NM_000887	Cluster1
chr12	53191322	53207251	NM_000889	Cluster1
chr19	15640896	15662825	NM_000896	Cluster1
chr16	69709400	69726560	NM_000903	Cluster1
chr6	2999893	3019755	NM_000904	Cluster1
chr1	153678687	153693992	NM_000906	Cluster1
chr1	28812169	28871267	NM_000911	Cluster1
chr3	8750408	8769614	NM_000916	Cluster1
chr17	81843165	81860535	NM_000918	Cluster1
chr11	66848419	66958383	NM_000920	Cluster1
chr19	18207960	18248200	NM_000923	Cluster1
chr12	54549600	54579239	NM_000924	Cluster1
chr1	20070193	20091911	NM_000929	Cluster1
chr11	64251529	64269452	NM_000932	Cluster1
chr17	7484365	7514614	NM_000937	Cluster1
chr4	56978895	57031158	NM_000938	Cluster1
chr7	75915154	75986855	NM_000941	Cluster1
chr5	123023249	123036725	NM_000943	Cluster1
chr2	68178856	68252532	NM_000945	Cluster1
chr12	56731579	56752323	NM_000946	Cluster1
chr6	57317629	57646850	NM_000947	Cluster1
chr19	49581315	49591004	NM_000951	Cluster1
chr20	49503873	49568137	NM_000961	Cluster1
chr1	92832039	92841924	NM_000969	Cluster1
chr1	6185019	6199595	NM_000983	Cluster1
chr4	108620557	108630483	NM_000995	Cluster1
chr5	40825262	40835222	NM_000997	Cluster1
chr4	9826223	10040248	NM_001001290	Cluster1
chr19	11435256	11450967	NM_001001329	Cluster1
chr3	10324022	10505586	NM_001001331	Cluster1
chr10	100273277	100286364	NM_001001342	Cluster1
chr15	23127065	23136822	NM_001001413	Cluster1
chr19	21505601	21540667	NM_001001415	Cluster1
chr17	36165680	36176624	NM_001001417	Cluster1
chr17	38003992	38138868	NM_001001418	Cluster1
chr17	38057692	38068634	NM_001001418_r1	Cluster1
chr17	38181658	38192583	NM_001001418_r2	Cluster1
chr5	136132844	136182733	NM_001001419	Cluster1
chr5	136132844	136182734	NM_001001420	Cluster1
chr21	46188445	46228824	NM_001001438	Cluster1
chr22	30635780	30647893	NM_001001479	Cluster1
chr8	73786218	73878862	NM_001001481	Cluster1
chr10	16436942	16513745	NM_001001484	Cluster1
chr5	176620081	176630534	NM_001001502	Cluster1
chr21	42893308	42913299	NM_001001503	Cluster1
chr19	4472296	4502203	NM_001001520	Cluster1
chr1	151806070	151826096	NM_001001523	Cluster1
chr19	19264365	19273301	NM_001001524	Cluster1
chr7	50590067	50732353	NM_001001549	Cluster1
chr1	205381378	205422056	NM_001001552	Cluster1
chr7	50590067	50793453	NM_001001555	Cluster1
chr22	37608473	37633564	NM_001001560	Cluster1
chr19	39480837	39493779	NM_001001563	Cluster1
chr21	42653751	42775508	NM_001001567	Cluster1
chr21	42653751	42775508	NM_001001568	Cluster1
chr21	42653751	42775508	NM_001001569	Cluster1
chr21	42653751	42775508	NM_001001570	Cluster1
chr21	42653751	42775508	NM_001001571	Cluster1
chr21	42653751	42775508	NM_001001572	Cluster1
chr21	42653751	42775508	NM_001001573	Cluster1
chr21	42653751	42775508	NM_001001574	Cluster1
chr21	42653751	42775508	NM_001001575	Cluster1
chr21	42653751	42775508	NM_001001576	Cluster1
chr21	42653751	42775508	NM_001001577	Cluster1
chr21	42653751	42775508	NM_001001578	Cluster1
chr21	42653751	42775508	NM_001001579	Cluster1
chr21	42653751	42775508	NM_001001580	Cluster1
chr21	42653751	42775508	NM_001001581	Cluster1
chr21	42653751	42775508	NM_001001582	Cluster1
chr21	42653751	42775508	NM_001001583	Cluster1
chr21	42653751	42775508	NM_001001584	Cluster1
chr21	42653751	42775508	NM_001001585	Cluster1
chr7	149102785	149126324	NM_001001661	Cluster1
chr13	98143093	98245304	NM_001001715	Cluster1
chr22	50309029	50327012	NM_001001794	Cluster1
chr21	42403901	42447682	NM_001001895	Cluster1
chr18	46080247	46098296	NM_001001935	Cluster1
chr18	46084143	46104233	NM_001001937	Cluster1
chr10	7788176	7807799	NM_001001973	Cluster1
chr21	29024616	29054486	NM_001001992	Cluster1
chr1	11066618	11099869	NM_001001998	Cluster1
chr2	18562870	18589569	NM_001002006	Cluster1
chr7	33014112	33062776	NM_001002009	Cluster1
chr12	131929275	131945896	NM_001002019	Cluster1
chr12	131929275	131945896	NM_001002020	Cluster1
chr6	127288711	127343609	NM_001002030	Cluster1
chr12	53665169	53676330	NM_001002031	Cluster1
chr17	75135248	75154512	NM_001002032	Cluster1
chr14	94376746	94390635	NM_001002235	Cluster1
chr14	94376746	94390635	NM_001002236	Cluster1
chr17	81891712	81900533	NM_001002244	Cluster1
chr17	81891712	81900533	NM_001002245	Cluster1
chr17	81891712	81900533	NM_001002246	Cluster1
chr17	81891712	81900533	NM_001002247	Cluster1
chr17	81891712	81900533	NM_001002248	Cluster1
chr17	81891926	81900533	NM_001002249	Cluster1
chr2	30447245	30644225	NM_001002257	Cluster1
chr12	30709551	30754514	NM_001002259	Cluster1
chr10	97738476	97760907	NM_001002261	Cluster1
chr10	97737127	97760895	NM_001002262	Cluster1
chr1	161663114	161678654	NM_001002273	Cluster1
chr1	161663114	161678654	NM_001002274	Cluster1
chr1	161663114	161678654	NM_001002275	Cluster1
chr8	41490581	41510980	NM_001002296	Cluster1
chr2	69396125	69437435	NM_001002755	Cluster1
chr2	69396112	69437628	NM_001002756	Cluster1
chr10	72332834	72354919	NM_001002762	Cluster1
chr19	56087365	56121295	NM_001002836	Cluster1
chr16	69118008	69132588	NM_001002847	Cluster1
chr15	60347150	60397986	NM_001002857	Cluster1
chr15	60347150	60397986	NM_001002858	Cluster1
chr14	93237549	93333036	NM_001002860	Cluster1
chr22	29505878	29553757	NM_001002877	Cluster1
chr22	29508166	29553655	NM_001002878	Cluster1
chr22	29508166	29553655	NM_001002879	Cluster1
chr17	44395280	44503406	NM_001002909	Cluster1
chr16	20028238	20073890	NM_001002911	Cluster1
chr22	39570752	39689735	NM_001003406	Cluster1
chr18	47808956	47930872	NM_001003652	Cluster1
chr11	46936688	47162247	NM_001003676	Cluster1
chr11	46936760	47162247	NM_001003677	Cluster1
chr11	46936760	47164384	NM_001003678	Cluster1
chr22	35257492	35295807	NM_001003681	Cluster1
chr22	29730955	29767007	NM_001003692	Cluster1
chr3	9731734	9748015	NM_001003694	Cluster1
chr21	25724479	25735654	NM_001003696	Cluster1
chr21	25724479	25735654	NM_001003697	Cluster1
chr21	25724479	25735654	NM_001003701	Cluster1
chr7	144186082	144195833	NM_001003702	Cluster1
chr21	25724479	25735654	NM_001003703	Cluster1
chr7	99458157	99466167	NM_001003713	Cluster1
chr7	99458157	99466167	NM_001003714	Cluster1
chr17	75649690	75667154	NM_001003715	Cluster1
chr17	75648862	75667154	NM_001003716	Cluster1
chr9	128504718	128542285	NM_001003722	Cluster1
chr22	50767505	50783636	NM_001003789	Cluster1
chr8	37736633	37746550	NM_001003790	Cluster1
chr8	37736633	37746550	NM_001003791	Cluster1
chr7	75092589	75149817	NM_001003795	Cluster1
chr22	41673932	41688867	NM_001003796	Cluster1
chr9	92711362	92764833	NM_001003800	Cluster1
chr7	151238783	151248694	NM_001003801	Cluster1
chr7	151238972	151276734	NM_001003802	Cluster1
chr14	50312323	50327957	NM_001003803	Cluster1
chr14	50312323	50327957	NM_001003805	Cluster1
chr4	82353313	82373996	NM_001003810	Cluster1
chr11	5596636	5612952	NM_001003818	Cluster1
chr11	5596636	5644395	NM_001003819	Cluster1
chr22	43999210	44169232	NM_001003828	Cluster1
chr5	1201594	1225111	NM_001003841	Cluster1
chr22	20507609	20587619	NM_001003891	Cluster1
chr20	37289654	37317260	NM_001003897	Cluster1
chr7	44606626	44676578	NM_001003941	Cluster1
chr9	113386311	113401338	NM_001003945	Cluster1
chr19	36140065	36150353	NM_001003962	Cluster1
chr11	809966	812876	NM_001004	Cluster1
chr3	13549124	13638402	NM_001004019	Cluster1
chr1	206635535	206655175	NM_001004023	Cluster1
chrX	102712447	102717733	NM_001004051	Cluster1
chr11	6169354	6170326	NM_001004052	Cluster1
chr16	67207138	67226998	NM_001004055	Cluster1
chr4	2963570	3040760	NM_001004056	Cluster1
chr4	2963570	3040760	NM_001004057	Cluster1
chr11	56159393	56160317	NM_001004058	Cluster1
chr11	55650903	55651839	NM_001004059	Cluster1
chr16	18499923	18562112	NM_001004060	Cluster1
chr14	19935607	19936683	NM_001004063	Cluster1
chr11	56136770	56137718	NM_001004064	Cluster1
chr9	110048597	110172511	NM_001004065	Cluster1
chr16	16232527	16294811	NM_001004067	Cluster1
chr16	14833713	14896157	NM_001004067_r1	Cluster1
chr5	177426675	177441353	NM_001004105	Cluster1
chr5	177426675	177442891	NM_001004106	Cluster1
chr11	55638357	55639296	NM_001004124	Cluster1
chr9	25676388	25678858	NM_001004125	Cluster1
chr13	52012397	52033600	NM_001004127	Cluster1
chr1	180154832	180198034	NM_001004128	Cluster1
chr12	48202338	48203292	NM_001004134	Cluster1
chr7	144095107	144096040	NM_001004135	Cluster1
chr1	248452797	248453772	NM_001004136	Cluster1
chr11	4545190	4546144	NM_001004137	Cluster1
chr15	101922141	101923059	NM_001004195	Cluster1
chr3	112332946	112362811	NM_001004196	Cluster1
chr10	45302650	45315608	NM_001004297	Cluster1
chr10	126424996	126521493	NM_001004298	Cluster1
chr19	53467732	53496255	NM_001004301	Cluster1
chr1	56718790	56819404	NM_001004303	Cluster1
chr12	53180721	53195142	NM_001004304	Cluster1
chrX	112083024	112457245	NM_001004308	Cluster1
chr15	90352283	90362847	NM_001004309	Cluster1
chr1	159802359	159816257	NM_001004310	Cluster1
chr2	70777309	70790643	NM_001004311	Cluster1
chr3	187698258	187702557	NM_001004312	Cluster1
chr17	10713294	10730023	NM_001004313	Cluster1
chr3	156826306	157046129	NM_001004316	Cluster1
chr6	104957106	105083332	NM_001004317	Cluster1
chr19	39084367	39111492	NM_001004318	Cluster1
chr1	156298623	156299307	NM_001004319	Cluster1
chr7	15200316	15562015	NM_001004320	Cluster1
chr7	100456619	100464260	NM_001004323	Cluster1
chr11	1597176	1598294	NM_001004325	Cluster1
chr12	8172553	8180046	NM_001004328	Cluster1
chr12	45014671	45051099	NM_001004329	Cluster1
chr12	92736488	92772092	NM_001004330	Cluster1
chr17	7012416	7014533	NM_001004333	Cluster1
chr17	38324570	38343956	NM_001004334	Cluster1
chr1	52842759	52894995	NM_001004339	Cluster1
chr1	157092042	157099808	NM_001004341	Cluster1
chr1	231162927	231221564	NM_001004342	Cluster1
chr1	241995489	241999098	NM_001004343	Cluster1
chr4	74158117	74303097	NM_001004346	Cluster1
chr7	100307701	100322196	NM_001004351	Cluster1
chr9	26066674	26118408	NM_001004352	Cluster1
chr9	137251260	137253483	NM_001004353	Cluster1
chr9	137299630	137302271	NM_001004354	Cluster1
chr4	1011625	1026898	NM_001004356	Cluster1
chr4	1011971	1026898	NM_001004358	Cluster1
chr2	115162154	115845752	NM_001004360	Cluster1
chr21	42071316	42142995	NM_001004416	Cluster1
chr12	9669712	9699552	NM_001004419	Cluster1
chr22	38111494	38181830	NM_001004426	Cluster1
chr17	83079608	83095122	NM_001004431	Cluster1
chr1	151800264	151805419	NM_001004432	Cluster1
chr1	26037251	26046118	NM_001004434	Cluster1
chr15	68296531	68432163	NM_001004439	Cluster1
chr1	112720566	112727234	NM_001004440	Cluster1
chr5	80556754	80570280	NM_001004441	Cluster1
chr9	122628578	122629535	NM_001004450	Cluster1
chr9	122476957	122477926	NM_001004451	Cluster1
chr9	122519140	122520082	NM_001004452	Cluster1
chr9	122749847	122750783	NM_001004453	Cluster1
chr9	122567547	122568477	NM_001004454	Cluster1
chr19	9093244	9094186	NM_001004456	Cluster1
chr9	122553111	122554214	NM_001004457	Cluster1
chr11	58214744	58215722	NM_001004458	Cluster1
chr11	58203203	58204181	NM_001004459	Cluster1
chr11	6869754	6870666	NM_001004460	Cluster1
chr11	7927717	7928662	NM_001004461	Cluster1
chr11	124015574	124016510	NM_001004462	Cluster1
chr11	124038065	124039001	NM_001004463	Cluster1
chr11	124029622	124030558	NM_001004464	Cluster1
chr19	15949007	15949958	NM_001004465	Cluster1
chr19	15794048	15794996	NM_001004466	Cluster1
chr1	159313669	159314659	NM_001004467	Cluster1
chr1	159535077	159536007	NM_001004469	Cluster1
chr10	17315420	17454595	NM_001004470	Cluster1
chr11	58227881	58228918	NM_001004471	Cluster1
chr1	158479877	158480885	NM_001004472	Cluster1
chr1	158465561	158466503	NM_001004473	Cluster1
chr11	123976695	123977691	NM_001004474	Cluster1
chr1	158398521	158399466	NM_001004475	Cluster1
chr1	158419927	158420866	NM_001004476	Cluster1
chr1	158578918	158579899	NM_001004477	Cluster1
chr1	158606438	158607380	NM_001004478	Cluster1
chr14	20242791	20243766	NM_001004479	Cluster1
chr14	20223709	20224702	NM_001004480	Cluster1
chr9	104604670	104605627	NM_001004481	Cluster1
chr9	104598456	104599413	NM_001004482	Cluster1
chr9	104569167	104570130	NM_001004483	Cluster1
chr9	104694421	104695462	NM_001004484	Cluster1
chr9	104504262	104505222	NM_001004485	Cluster1
chrX	131544073	131545000	NM_001004486	Cluster1
chr9	35869462	35870401	NM_001004487	Cluster1
chr7	144074219	144075152	NM_001004488	Cluster1
chr11	6785016	6786014	NM_001004489	Cluster1
chr11	6768006	6768957	NM_001004490	Cluster1
chr1	247965331	247966339	NM_001004491	Cluster1
chr1	247451028	247451982	NM_001004492	Cluster1
chr11	6921001	6921994	NM_001004684	Cluster1
chr7	143935232	143936186	NM_001004685	Cluster1
chr1	248038171	248039305	NM_001004686	Cluster1
chr1	248060681	248061620	NM_001004687	Cluster1
chr1	248179985	248181029	NM_001004688	Cluster1
chr1	248203067	248204006	NM_001004689	Cluster1
chr1	248145147	248146086	NM_001004690	Cluster1
chr1	248323629	248324568	NM_001004691	Cluster1
chr1	248294615	248295578	NM_001004692	Cluster1
chr1	248592829	248593768	NM_001004693	Cluster1
chr1	248558543	248559491	NM_001004694	Cluster1
chr1	248272851	248273814	NM_001004695	Cluster1
chr1	248361580	248362627	NM_001004696	Cluster1
chr1	248488588	248491113	NM_001004697	Cluster1
chr1	248556966	248559491	NM_001004697_r1	Cluster1
chr1	247491067	247492409	NM_001004698	Cluster1
chr19	8730953	8732009	NM_001004699	Cluster1
chr11	55603353	55604398	NM_001004700	Cluster1
chr11	55572127	55573060	NM_001004701	Cluster1
chr11	48324919	48325955	NM_001004702	Cluster1
chr11	54603068	54603998	NM_001004703	Cluster1
chr11	55665166	55666096	NM_001004704	Cluster1
chr11	59477429	59478365	NM_001004705	Cluster1
chr11	59503575	59504511	NM_001004706	Cluster1
chr17	58169655	58170579	NM_001004707	Cluster1
chr11	59456960	59457905	NM_001004708	Cluster1
chr11	59514912	59515857	NM_001004711	Cluster1
chr14	20014260	20015193	NM_001004712	Cluster1
chr19	15087065	15088133	NM_001004713	Cluster1
chr14	20033843	20034758	NM_001004714	Cluster1
chr14	20117467	20118438	NM_001004715	Cluster1
chr14	20060044	20060983	NM_001004717	Cluster1
chr15	22080526	22081610	NM_001004719	Cluster1
chr15_KI270727v1_random	372321	373405	NM_001004719_r2	Cluster1
chr2	105851846	105894272	NM_001004720	Cluster1
chr2	105745062	105894274	NM_001004722	Cluster1
chr14	19803769	19830253	NM_001004723	Cluster1
chr14	20143735	20144662	NM_001004724	Cluster1
chr11	48306222	48307152	NM_001004725	Cluster1
chr11	48263860	48264778	NM_001004726	Cluster1
chr11	48245103	48246015	NM_001004727	Cluster1
chr11	59443168	59444116	NM_001004728	Cluster1
chr11	59364458	59365394	NM_001004729	Cluster1
chr11	56663685	56664618	NM_001004730	Cluster1
chr14	21154864	21156063	NM_001004731	Cluster1
chr1	247738614	247739559	NM_001004732	Cluster1
chr11	58439119	58440173	NM_001004733	Cluster1
chr1	248681368	248682304	NM_001004734	Cluster1
chr11	55795555	55796500	NM_001004735	Cluster1
chr3	98469479	98470576	NM_001004736	Cluster1
chr3	98497680	98498631	NM_001004737	Cluster1
chr11	55811366	55812476	NM_001004738	Cluster1
chr11	55827218	55828154	NM_001004739	Cluster1
chr11	56612554	56613502	NM_001004740	Cluster1
chr11	56576773	56577721	NM_001004741	Cluster1
chr11	56469487	56470538	NM_001004742	Cluster1
chr11	56462468	56463401	NM_001004743	Cluster1
chr11	56417257	56418232	NM_001004744	Cluster1
chr11	56275638	56276619	NM_001004745	Cluster1
chr11	56232105	56233185	NM_001004746	Cluster1
chr11	56252199	56253222	NM_001004747	Cluster1
chr11	4954771	4955713	NM_001004748	Cluster1
chr11	4907369	4908308	NM_001004749	Cluster1
chr11	5351507	5352446	NM_001004750	Cluster1
chr11	4639714	4640838	NM_001004751	Cluster1
chr11	4768978	4769938	NM_001004752	Cluster1
chr11	4821320	4822456	NM_001004753	Cluster1
chr11	5453407	5454477	NM_001004754	Cluster1
chr11	4998982	4999930	NM_001004755	Cluster1
chr11	5389376	5390434	NM_001004756	Cluster1
chr11	5422110	5423206	NM_001004757	Cluster1
chr11	4848236	4849208	NM_001004758	Cluster1
chr11	4881699	4883083	NM_001004759	Cluster1
chr11	5199734	5200700	NM_001004760	Cluster1
chr11	75399517	75406906	NM_001005	Cluster1
chr11	5131691	5132642	NM_001005160	Cluster1
chr11	4367262	4368386	NM_001005161	Cluster1
chr11	5580876	5581884	NM_001005162	Cluster1
chr11	5488684	5489748	NM_001005163	Cluster1
chr11	5058649	5059627	NM_001005164	Cluster1
chr11	5884292	5885231	NM_001005165	Cluster1
chr11	5900764	5901760	NM_001005166	Cluster1
chr11	5840927	5841897	NM_001005167	Cluster1
chr11	5856748	5857702	NM_001005168	Cluster1
chr11	4594038	4595013	NM_001005169	Cluster1
chr11	4586790	4587905	NM_001005170	Cluster1
chr11	4488878	4489908	NM_001005171	Cluster1
chr11	4449294	4450361	NM_001005172	Cluster1
chr11	5985891	5986985	NM_001005173	Cluster1
chr11	5820335	5821301	NM_001005174	Cluster1
chr11	5754692	5755729	NM_001005175	Cluster1
chr2	230225735	230239076	NM_001005176	Cluster1
chr11	4803432	4804380	NM_001005177	Cluster1
chr11	6199223	6200186	NM_001005178	Cluster1
chr11	6001850	6003192	NM_001005179	Cluster1
chr11	5736447	5738523	NM_001005180	Cluster1
chr11	6107683	6108835	NM_001005181	Cluster1
chr12	55320599	55321538	NM_001005182	Cluster1
chr12	55426253	55427192	NM_001005183	Cluster1
chr1	158754815	158755847	NM_001005184	Cluster1
chr1	158765743	158766682	NM_001005185	Cluster1
chr11	58030952	58031906	NM_001005186	Cluster1
chr11	123942866	123943838	NM_001005187	Cluster1
chr11	123753579	123754518	NM_001005188	Cluster1
chr1	158547127	158548105	NM_001005189	Cluster1
chr19	14840947	14841877	NM_001005190	Cluster1
chr19	9213849	9214871	NM_001005191	Cluster1
chr19	9114827	9115763	NM_001005192	Cluster1
chr19	9102268	9103306	NM_001005193	Cluster1
chr11	124569996	124571374	NM_001005194	Cluster1
chr11	124542721	124543654	NM_001005195	Cluster1
chr11	124423941	124424871	NM_001005196	Cluster1
chr11	123906431	123907376	NM_001005197	Cluster1
chr11	124264826	124265867	NM_001005198	Cluster1
chr11	56290126	56291062	NM_001005199	Cluster1
chr11	56105042	56105981	NM_001005200	Cluster1
chr11	56122372	56123311	NM_001005201	Cluster1
chr11	56318306	56319245	NM_001005202	Cluster1
chr12	48525631	48528103	NM_001005203	Cluster1
chr11	56375623	56376553	NM_001005204	Cluster1
chr11	56360214	56361288	NM_001005205	Cluster1
chr17	58982648	59106880	NM_001005207	Cluster1
chr2	219544027	219550595	NM_001005209	Cluster1
chr11	57181952	57191716	NM_001005210	Cluster1
chr11	58118499	58119444	NM_001005211	Cluster1
chr11	58023880	58181612	NM_001005212	Cluster1
chr11	56700387	56701305	NM_001005213	Cluster1
chr1	165543999	165563957	NM_001005214	Cluster1
chr6	29111809	29112884	NM_001005216	Cluster1
chr4	190024367	190027256	NM_001005217	Cluster1
chr11	58506806	58508300	NM_001005218	Cluster1
chr1	450739	451678	NM_001005221	Cluster1
chr1	685715	686654	NM_001005221_r1	Cluster1
chr5	181367286	181368225	NM_001005221_r2	Cluster1
chr1	450739	451678	NM_001005224	Cluster1
chr1	685715	686654	NM_001005224_r1	Cluster1
chr5	181367286	181368225	NM_001005224_r2	Cluster1
chr6	29086207	29087313	NM_001005226	Cluster1
chr9	122675129	122676104	NM_001005234	Cluster1
chr9	122723989	122724925	NM_001005235	Cluster1
chr9	122661715	122662648	NM_001005236	Cluster1
chr11	4923373	4924339	NM_001005237	Cluster1
chr11	4914718	4915663	NM_001005238	Cluster1
chr22	15528158	15529139	NM_001005239	Cluster1
chr19	107145	111696	NM_001005240	Cluster1
chr15	22094430	22095864	NM_001005241	Cluster1
chr12	32790755	32896777	NM_001005242	Cluster1
chr12	55129768	55130776	NM_001005243	Cluster1
chr11	56542339	56543257	NM_001005245	Cluster1
chr11	49981472	49982535	NM_001005270	Cluster1
chr17	7884795	7912755	NM_001005271	Cluster1
chr11	54706831	54707902	NM_001005272	Cluster1
chr17	7888788	7912755	NM_001005273	Cluster1
chr11	55343200	55344187	NM_001005274	Cluster1
chr11	55367883	55368918	NM_001005275	Cluster1
chr7	99876061	99877033	NM_001005276	Cluster1
chr1	450739	451678	NM_001005277	Cluster1
chr1	685715	686654	NM_001005277_r1	Cluster1
chr5	181367286	181368225	NM_001005277_r2	Cluster1
chr1	158776681	158777635	NM_001005278	Cluster1
chr1	158699578	158700696	NM_001005279	Cluster1
chr12	55221024	55221975	NM_001005280	Cluster1
chr7	144003928	144004975	NM_001005281	Cluster1
chr11	56490434	56491370	NM_001005282	Cluster1
chr11	58190433	58191518	NM_001005283	Cluster1
chr11	56742827	56743811	NM_001005284	Cluster1
chr11	75088691	75096890	NM_001005285	Cluster1
chr1	247711828	247712755	NM_001005286	Cluster1
chr7	144231910	144232843	NM_001005287	Cluster1
chr7	144318124	144319057	NM_001005287_r1	Cluster1
chr11	5440541	5441553	NM_001005288	Cluster1
chr11	5544560	5545523	NM_001005289	Cluster1
chr1	109279553	109283168	NM_001005290	Cluster1
chr17	17811333	17836986	NM_001005291	Cluster1
chr11	56988913	56989843	NM_001005323	Cluster1
chr11	59712915	59713845	NM_001005324	Cluster1
chr11	123805407	123806349	NM_001005325	Cluster1
chr15	101805719	101806658	NM_001005326	Cluster1
chr1	158717167	158718115	NM_001005327	Cluster1
chr7	144258695	144259628	NM_001005328	Cluster1
chr11	4946158	4947100	NM_001005329	Cluster1
chrX	51803075	51902354	NM_001005332	Cluster1
chrX	51893622	51902354	NM_001005333	Cluster1
chr19	38836369	38852347	NM_001005335	Cluster1
chr9	128203378	128255244	NM_001005336	Cluster1
chr1	201283505	201332989	NM_001005337	Cluster1
chr3	98132697	98133639	NM_001005338	Cluster1
chr10	119499817	119542719	NM_001005339	Cluster1
chr7	23246774	23275108	NM_001005340	Cluster1
chr1	65147829	65232145	NM_001005353	Cluster1
chr12	53441648	53446643	NM_001005354	Cluster1
chr14	19402485	19434341	NM_001005356	Cluster1
chr19	10718052	10831910	NM_001005360	Cluster1
chr19	10718078	10831903	NM_001005361	Cluster1
chr19	10718052	10831910	NM_001005362	Cluster1
chr8	43292441	43363185	NM_001005365	Cluster1
chr12	121429095	121580246	NM_001005366	Cluster1
chr19	54415463	54436902	NM_001005367	Cluster1
chr10	43643858	43648799	NM_001005368	Cluster1
chr2	55236619	55269179	NM_001005369	Cluster1
chr9	127451485	127503501	NM_001005373	Cluster1
chr9	127452254	127503501	NM_001005374	Cluster1
chrY	24833819	24907040	NM_001005375	Cluster1
chrY	23129354	23199107	NM_001005375_r1	Cluster1
chr19	43646094	43670346	NM_001005376	Cluster1
chr19	43648578	43670169	NM_001005377	Cluster1
chr2	65227694	65271256	NM_001005386	Cluster1
chr1	204828653	205022822	NM_001005388	Cluster1
chr1	204828651	204977146	NM_001005389	Cluster1
chr17	59331654	59401729	NM_001005404	Cluster1
chr11	71581854	71582875	NM_001005405	Cluster1
chr16	1153240	1221772	NM_001005407	Cluster1
chr17	7315627	7329335	NM_001005408	Cluster1
chr10	56357437	56361273	NM_001005413	Cluster1
chr19	8413302	8439015	NM_001005415	Cluster1
chr19	8413304	8439015	NM_001005416	Cluster1
chr1	43980504	43991171	NM_001005417	Cluster1
chr10	129835232	129964274	NM_001005463	Cluster1
chr1	149840686	149841204	NM_001005464	Cluster1
chr1	149852607	149853125	NM_001005464_r1	Cluster1
chr14	21569802	21570744	NM_001005465	Cluster1
chr14	21633835	21634940	NM_001005466	Cluster1
chr11	124396409	124397351	NM_001005467	Cluster1
chr11	124382401	124383343	NM_001005468	Cluster1
chr11	58402464	58403409	NM_001005469	Cluster1
chr11	48216809	48217739	NM_001005470	Cluster1
chr1	248387608	248388535	NM_001005471	Cluster1
chr5	41306951	41510601	NM_001005473	Cluster1
chr3	101827989	101861022	NM_001005474	Cluster1
chr2	158456951	158681428	NM_001005476	Cluster1
chr3	98264243	98265356	NM_001005479	Cluster1
chr7	144109582	144110539	NM_001005480	Cluster1
chr3	98282887	98283832	NM_001005482	Cluster1
chr14	19920606	19921578	NM_001005483	Cluster1
chr1	69090	70008	NM_001005484	Cluster1
chr14	19975518	19976565	NM_001005486	Cluster1
chr1	247672117	247673041	NM_001005487	Cluster1
chr11	58358123	58359069	NM_001005489	Cluster1
chr12	55247287	55248226	NM_001005490	Cluster1
chr11	55967557	55968463	NM_001005491	Cluster1
chr11	56176617	56177556	NM_001005492	Cluster1
chr12	55294287	55295232	NM_001005493	Cluster1
chr12	55551226	55552156	NM_001005494	Cluster1
chr1	248473350	248474307	NM_001005495	Cluster1
chr11	55838751	55839738	NM_001005496	Cluster1
chr12	55365110	55366049	NM_001005497	Cluster1
chr17	76470895	76501423	NM_001005498	Cluster1
chr12	55469199	55470138	NM_001005499	Cluster1
chr14	19780322	19781264	NM_001005500	Cluster1
chr14	19876267	19877212	NM_001005501	Cluster1
chr12	68851175	68933199	NM_001005502	Cluster1
chr14	20197335	20198373	NM_001005503	Cluster1
chr8	166085	167024	NM_001005504	Cluster1
chr3	50362612	50503634	NM_001005505	Cluster1
chr11	48488792	48489722	NM_001005512	Cluster1
chr11	50032873	50033794	NM_001005513	Cluster1
chr3	98149385	98150318	NM_001005514	Cluster1
chr3	98168699	98169641	NM_001005515	Cluster1
chr3	98390665	98391631	NM_001005516	Cluster1
chr3	98353853	98354819	NM_001005517	Cluster1
chr12	55400528	55401467	NM_001005518	Cluster1
chr12	55492377	55493316	NM_001005519	Cluster1
chr1	247921017	247921956	NM_001005522	Cluster1
chr2	197418796	197435093	NM_001005526	Cluster1
chr3	68731763	68932610	NM_001005527	Cluster1
chr11	58422264	58423313	NM_001005566	Cluster1
chr11	5342513	5505652	NM_001005567	Cluster1
chrX	69616112	70039471	NM_001005609	Cluster1
chrX	69616112	69861117	NM_001005610	Cluster1
chrX	69616112	70039471	NM_001005612	Cluster1
chrX	69616112	69861117	NM_001005613	Cluster1
chr17	75724695	75757818	NM_001005619	Cluster1
chr17	75721458	75757818	NM_001005731	Cluster1
chr22	28687742	28741820	NM_001005735	Cluster1
chr19	51761179	51770531	NM_001005738	Cluster1
chr2	63892149	64019428	NM_001005739	Cluster1
chr1	155234451	155244627	NM_001005741	Cluster1
chr1	155234451	155244627	NM_001005742	Cluster1
chr14	73275209	73458580	NM_001005743	Cluster1
chr14	73275209	73458580	NM_001005744	Cluster1
chr14	73275209	73458580	NM_001005745	Cluster1
chr2	151832770	152098763	NM_001005746	Cluster1
chr2	151832770	151973978	NM_001005747	Cluster1
chr10	50067953	50133509	NM_001005751	Cluster1
chr1	34782267	34786364	NM_001005752	Cluster1
chr2	86503429	86563443	NM_001005753	Cluster1
chr2	202206170	202238597	NM_001005781	Cluster1
chr2	202206170	202238597	NM_001005782	Cluster1
chr1	119368784	119394130	NM_001005783	Cluster1
chrY	24833842	24907040	NM_001005785	Cluster1
chrY	23219456	23291356	NM_001005785_r1	Cluster1
chrY	24833842	24907040	NM_001005786	Cluster1
chrY	23219456	23291356	NM_001005786_r1	Cluster1
chr17	75165585	75182959	NM_001005849	Cluster1
chr19	56661979	56671757	NM_001005850	Cluster1
chr19	40028259	40056231	NM_001005851	Cluster1
chr2	240029490	240030429	NM_001005853	Cluster1
chr1	154325524	154337846	NM_001005855	Cluster1
chr3	134157133	134250744	NM_001005861	Cluster1
chr17	39688083	39728662	NM_001005862	Cluster1
chr3	48688002	48717278	NM_001005909	Cluster1
chr3	48693450	48717221	NM_001005910	Cluster1
chr3	48693450	48717221	NM_001005911	Cluster1
chr3	50267557	50277171	NM_001005914	Cluster1
chr12	56080107	56085617	NM_001005915	Cluster1
chr13	51932670	52011450	NM_001005918	Cluster1
chr16	681669	684334	NM_001005920	Cluster1
chr11	1584341	1585283	NM_001005922	Cluster1
chr4	151099627	151104642	NM_001006	Cluster1
chr3	129278973	129305292	NM_001006109	Cluster1
chr21	46286329	46292521	NM_001006114	Cluster1
chr3	49724294	49786540	NM_001006115	Cluster1
chrY	22403409	22417649	NM_001006117	Cluster1
chrY	22168773	22183008	NM_001006117_r1	Cluster1
chrY	21880075	21894486	NM_001006118	Cluster1
chrY	21511377	21525786	NM_001006118_r1	Cluster1
chrY	21903617	21918027	NM_001006118_r2	Cluster1
chrY	21880075	21894526	NM_001006120	Cluster1
chrY	21511337	21525786	NM_001006120_r1	Cluster1
chrY	21534878	21549326	NM_001006120_r2	Cluster1
chrY	21903617	21918067	NM_001006120_r3	Cluster1
chrY	21880075	21894526	NM_001006121	Cluster1
chrY	21511337	21525786	NM_001006121_r1	Cluster1
chrY	21534878	21549326	NM_001006121_r2	Cluster1
chrY	21903617	21918067	NM_001006121_r3	Cluster1
chr5	65926553	66081023	NM_001006600	Cluster1
chr1	92842166	92961462	NM_001006605	Cluster1
chr17	46512709	46555648	NM_001006607	Cluster1
chr16	48360535	48365887	NM_001006610	Cluster1
chrX	103356505	103358462	NM_001006612	Cluster1
chrX	103356505	103358462	NM_001006613	Cluster1
chrX	103356505	103358462	NM_001006614	Cluster1
chr9	113313221	113340275	NM_001006615	Cluster1
chr5	176647483	176659051	NM_001006616	Cluster1
chr9	125437393	125707208	NM_001006617	Cluster1
chr9	125521468	125707208	NM_001006618	Cluster1
chr9	125437393	125707234	NM_001006619	Cluster1
chr9	125437393	125707234	NM_001006620	Cluster1
chr9	125437393	125707234	NM_001006621	Cluster1
chr2	127762485	127811187	NM_001006622	Cluster1
chr2	127735378	127811171	NM_001006623	Cluster1
chr1	13585459	13617957	NM_001006624	Cluster1
chr1	13585459	13617957	NM_001006625	Cluster1
chr7	136869084	137020247	NM_001006626	Cluster1
chr7	136868651	137020247	NM_001006627	Cluster1
chr7	136869245	137020247	NM_001006628	Cluster1
chr7	136869245	137020247	NM_001006629	Cluster1
chr7	136868651	137017024	NM_001006630	Cluster1
chr7	136869084	137020247	NM_001006631	Cluster1
chr7	136869084	137020247	NM_001006632	Cluster1
chr16	24919390	25015369	NM_001006634	Cluster1
chr2	176269441	176338025	NM_001006635	Cluster1
chr2	143944413	144294493	NM_001006636	Cluster1
chr17	74737255	74747335	NM_001006638	Cluster1
chrX	103628974	103630948	NM_001006639	Cluster1
chrX	103628715	103630948	NM_001006640	Cluster1
chr9	128068199	128109258	NM_001006641	Cluster1
chr9	128091463	128109258	NM_001006642	Cluster1
chr4	186144286	186172663	NM_001006655	Cluster1
chr19	50026004	50048774	NM_001006656	Cluster1
chr2	19910265	19990105	NM_001006657	Cluster1
chr1	207454327	207489892	NM_001006658	Cluster1
chr1	26545841	26575025	NM_001006665	Cluster1
chr22	39040863	39044423	NM_001006666	Cluster1
chrX	57119681	57121546	NM_001006681	Cluster1
chrX	57119681	57121548	NM_001006682	Cluster1
chrX	57119681	57121546	NM_001006683	Cluster1
chrX	103252994	103255193	NM_001006684	Cluster1
chr6	166409363	166862525	NM_001006932	Cluster1
chrX	103607905	103609927	NM_001006933	Cluster1
chrX	103585484	103587736	NM_001006935	Cluster1
chrX	103585484	103587736	NM_001006937	Cluster1
chrX	102138501	102142481	NM_001006938	Cluster1
chr10	48909479	48925287	NM_001006939	Cluster1
chr3	184242328	184249525	NM_001006941	Cluster1
chr1	22563488	22589619	NM_001006943	Cluster1
chr11	64359161	64372215	NM_001006944	Cluster1
chr1	110947189	110963944	NM_001006945	Cluster1
chr2	20200796	20225433	NM_001006946	Cluster1
chr12	100069907	100142874	NM_001006947	Cluster1
chr17	30477407	30527592	NM_001007025	Cluster1
chr12	6924458	6942321	NM_001007026	Cluster1
chr8	58553168	58582860	NM_001007070	Cluster1
chr11	2129111	2149603	NM_001007139	Cluster1
chr22	31754018	31815991	NM_001007188	Cluster1
chr1	174999434	175012027	NM_001007214	Cluster1
chr2	68734810	68826825	NM_001007231	Cluster1
chr5	60873831	60945078	NM_001007233	Cluster1
chr5	60903359	60945070	NM_001007234	Cluster1
chr1	116574407	116667733	NM_001007237	Cluster1
chr1	171781659	171797716	NM_001007239	Cluster1
chr21	39296436	39313786	NM_001007246	Cluster1
chr19	34758072	34773215	NM_001007248	Cluster1
chr7	64990355	65006687	NM_001007253	Cluster1
chr21	36043683	36060364	NM_001007259	Cluster1
chr21	36043683	36060364	NM_001007261	Cluster1
chr19	45079259	45091518	NM_001007269	Cluster1
chr19	45079259	45091518	NM_001007270	Cluster1
chr6	158312464	158511824	NM_001007466	Cluster1
chr22	31496535	31618588	NM_001007467	Cluster1
chr22	23786965	23838009	NM_001007468	Cluster1
chr19	16719846	16817952	NM_001007525	Cluster1
chr3	49790733	49799873	NM_001007540	Cluster1
chr1	206053172	206102449	NM_001007544	Cluster1
chr1	114716915	114757984	NM_001007553	Cluster1
chr19	43584366	43596135	NM_001007561	Cluster1
chr1	156815749	156881850	NM_001007792	Cluster1
chr10	123154243	123165370	NM_001007793	Cluster1
chr10	13100081	13138276	NM_001008211	Cluster1
chr10	13100162	13138307	NM_001008212	Cluster1
chr10	13100081	13138276	NM_001008213	Cluster1
chr2	98599314	98608512	NM_001008215	Cluster1
chr5	175871577	175884021	NM_001008220	Cluster1
chr18	46174021	46266992	NM_001008239	Cluster1
chr3	111998921	112013885	NM_001008272	Cluster1
chr3	111999159	112013888	NM_001008273	Cluster1
chr4	102868991	102892806	NM_001008388	Cluster1
chr14	54938948	55027099	NM_001008396	Cluster1
chr19	53431983	53458261	NM_001008401	Cluster1
chr14	104579763	104590515	NM_001008404	Cluster1
chr20	31870633	31944959	NM_001008409	Cluster1
chr2	119223833	119265651	NM_001008410	Cluster1
chr3	126006356	126056775	NM_001008487	Cluster1
chr2	241315186	241354026	NM_001008491	Cluster1
chr2	241315860	241354026	NM_001008492	Cluster1
chr17	76672550	76710965	NM_001008528	Cluster1
chr17	76679565	76710965	NM_001008529	Cluster1
chr14	92703809	92748627	NM_001008530	Cluster1
chr9	129835416	129881838	NM_001008563	Cluster1
chr22	26521995	26565341	NM_001008566	Cluster1
chr5	150357696	150384638	NM_001008657	Cluster1
chr11	85957175	86069084	NM_001008660	Cluster1
chr1	88935778	88992629	NM_001008661	Cluster1
chr1	88935772	88992960	NM_001008662	Cluster1
chr22	26491239	26512506	NM_001008697	Cluster1
chr19	14147742	14206169	NM_001008701	Cluster1
chr10	104353832	104455102	NM_001008723	Cluster1
chr14	63597038	63641871	NM_001008726	Cluster1
chr19	9560336	9584504	NM_001008727	Cluster1
chr14	89955926	90044764	NM_001008744	Cluster1
chr7	140404057	140427974	NM_001008749	Cluster1
chr11	92352095	92896469	NM_001008781	Cluster1
chr1	156308960	156338415	NM_001008800	Cluster1
chr19	52838009	52857619	NM_001008801	Cluster1
chr15	22838640	22868384	NM_001008860	Cluster1
chr15	22838640	22868384	NM_001008892	Cluster1
chr15	22838640	22868384	NM_001008894	Cluster1
chr13	113209612	113267108	NM_001008895	Cluster1
chr6	159778497	159789703	NM_001008897	Cluster1
chr11	46743047	46846280	NM_001008938	Cluster1
chr8	30785618	30812818	NM_001009552	Cluster1
chr1	9728925	9823965	NM_001009566	Cluster1
chr1	27934954	27956480	NM_001009568	Cluster1
chr2	73234235	73253022	NM_001009570	Cluster1
chr10	87357719	87370695	NM_001009610	Cluster1
chr17	81189595	81222965	NM_001009811	Cluster1
chr19	47403123	47419527	NM_001009813	Cluster1
chr5	863740	892550	NM_001009877	Cluster1
chr22	45192241	45240769	NM_001009880	Cluster1
chr1	52423275	52553092	NM_001009881	Cluster1
chr3	113648385	113696642	NM_001009899	Cluster1
chr3	184812142	185052614	NM_001009921	Cluster1
chr20	5099849	5113076	NM_001009923	Cluster1
chr20	5099837	5113087	NM_001009924	Cluster1
chr20	5099837	5113087	NM_001009925	Cluster1
chr1	152212075	152224193	NM_001009931	Cluster1
chr10	5878086	5889897	NM_001009941	Cluster1
chr10	5878086	5889897	NM_001009943	Cluster1
chr16	2088707	2135898	NM_001009944	Cluster1
chr1	54225431	54406394	NM_001009955	Cluster1
chr7	99558824	99576456	NM_001009960	Cluster1
chr20	3249301	3407662	NM_001009984	Cluster1
chr2	131047875	131093460	NM_001009993	Cluster1
chr19	18419397	18434562	NM_001009998	Cluster1
chr1	23019467	23083689	NM_001009999	Cluster1
chr19	52269586	52296046	NM_001010851	Cluster1
chr14	90524563	90816430	NM_001010854	Cluster1
chr1	228487381	228496188	NM_001010858	Cluster1
chr14	77377377	77391300	NM_001010860	Cluster1
chr1	9588910	9604949	NM_001010866	Cluster1
chr1	228165803	228182257	NM_001010867	Cluster1
chr6	87344812	87365463	NM_001010868	Cluster1
chr13	45393318	45418373	NM_001010875	Cluster1
chr19	57584144	57593890	NM_001010879	Cluster1
chr1	12938471	12947580	NM_001010889	Cluster1
chr9	95875690	95968840	NM_001010895	Cluster1
chr1	110150493	110202201	NM_001010898	Cluster1
chr6	36315760	36336888	NM_001010903	Cluster1
chr8	28021963	28083936	NM_001010906	Cluster1
chr10	97849842	97871578	NM_001010917	Cluster1
chr10	15211644	15371289	NM_001010924	Cluster1
chr6	155216965	155257723	NM_001010927	Cluster1
chr3	195863363	195895348	NM_001010938	Cluster1
chr1	47137440	47149727	NM_001010969	Cluster1
chr7	143381344	143391111	NM_001010972	Cluster1
chr20	50794893	50877177	NM_001010974	Cluster1
chr1	54007297	54018186	NM_001010978	Cluster1
chr17	78187316	78207701	NM_001010982	Cluster1
chr3	52694483	52706083	NM_001010983	Cluster1
chr1	109292364	109307011	NM_001010985	Cluster1
chr16	56932141	56944864	NM_001010989	Cluster1
chr7	35800985	35907105	NM_001011553	Cluster1
chr20	46557827	46684485	NM_001011554	Cluster1
chr9	120388874	120580167	NM_001011649	Cluster1
chr3	194587677	194633419	NM_001011655	Cluster1
chr10	103302795	103351140	NM_001011663	Cluster1
chr19	17049760	17075533	NM_001011699	Cluster1
chr9	126326828	126397637	NM_001011703	Cluster1
chr2	174072446	174248532	NM_001011708	Cluster1
chr20	31968150	32003387	NM_001011718	Cluster1
chr1	17580552	17697875	NM_001011722	Cluster1
chr13	52617524	52643786	NM_001011724	Cluster1
chr13	52617524	52643786	NM_001011725	Cluster1
chr16	74408630	74421470	NM_001011880	Cluster1
chr15	83016428	83067252	NM_001011885	Cluster1
chr17	40121970	40136917	NM_001012241	Cluster1
chr9	92325952	92620527	NM_001012267	Cluster1
chr17	78214252	78225635	NM_001012270	Cluster1
chr17	78214252	78225635	NM_001012271	Cluster1
chr12	49558302	49566439	NM_001012300	Cluster1
chr11	417937	442011	NM_001012302	Cluster1
chr1	9848275	9910269	NM_001012329	Cluster1
chr1	156860878	156881850	NM_001012331	Cluster1
chr5	34929558	34958964	NM_001012339	Cluster1
chr16	53491039	53503304	NM_001012398	Cluster1
chr4	164954445	164977657	NM_001012414	Cluster1
chr6	28432654	28443491	NM_001012455	Cluster1
chr19	55654049	55674716	NM_001012478	Cluster1
chr17	46923116	46936841	NM_001012511	Cluster1
chr18	59220157	59230770	NM_001012512	Cluster1
chr18	59220157	59230770	NM_001012513	Cluster1
chr2	230864941	230879248	NM_001012514	Cluster1
chr18	57544376	57586702	NM_001012515	Cluster1
chr2	230864949	230879254	NM_001012516	Cluster1
chr4	1211444	1249130	NM_001012614	Cluster1
chr19	45890022	45902613	NM_001012643	Cluster1
chr20	31861066	31870241	NM_001012644	Cluster1
chr11	62856108	62888860	NM_001012662	Cluster1
chr11	62856108	62888860	NM_001012664	Cluster1
chr10	84245052	84259960	NM_001012720	Cluster1
chr10	84245052	84259188	NM_001012722	Cluster1
chr9	136673142	136687457	NM_001012727	Cluster1
chr4	182890090	182917477	NM_001012732	Cluster1
chr19	11965039	11980616	NM_001012753	Cluster1
chr19	36510686	36528271	NM_001012756	Cluster1
chr16	88706502	88715396	NM_001012759	Cluster1
chr16	88706502	88715396	NM_001012762	Cluster1
chr19	50958630	50968972	NM_001012964	Cluster1
chr19	50958630	50968972	NM_001012965	Cluster1
chr1	234373682	234384049	NM_001012985	Cluster1
chr16	19701936	19718227	NM_001012991	Cluster1
chr9	112750759	112874987	NM_001012994	Cluster1
chr11	62880895	62888860	NM_001013251	Cluster1
chr19	44809058	44821421	NM_001013257	Cluster1
chr7	99472889	99482325	NM_001013258	Cluster1
chr22	37019741	37029814	NM_001013436	Cluster1
chr3	180912669	180982751	NM_001013438	Cluster1
chr3	180912669	180982751	NM_001013439	Cluster1
chr1	46203333	46221256	NM_001013615	Cluster1
chr4	1639880	1683991	NM_001013622	Cluster1
chr6	143864473	143938343	NM_001013623	Cluster1
chr1	12644546	12667086	NM_001013630	Cluster1
chr22	38578117	38656392	NM_001013647	Cluster1
chr15	90234208	90245811	NM_001013657	Cluster1
chr12	51817891	51831917	NM_001013690	Cluster1
chr22	26483876	26494658	NM_001013694	Cluster1
chr19	4522530	4535224	NM_001013706	Cluster1
chr7	1815794	2232945	NM_001013836	Cluster1
chr7	1815794	2232945	NM_001013837	Cluster1
chr16	67645143	67657569	NM_001013838	Cluster1
chr17	76081015	76103787	NM_001013839	Cluster1
chr19	4324042	4338827	NM_001013841	Cluster1
chr6	34417453	34426069	NM_001014	Cluster1
chr5	43039079	43040345	NM_001014279	Cluster1
chr13	113455818	113490711	NM_001014283	Cluster1
chr13	37009313	37059688	NM_001014286	Cluster1
chr1	153149581	153150890	NM_001014291	Cluster1
chr12	122172028	122174221	NM_001014336	Cluster1
chr1	152348734	152360006	NM_001014342	Cluster1
chr13	30202629	30307011	NM_001014380	Cluster1
chr14	104769349	104795748	NM_001014431	Cluster1
chr14	104769349	104795743	NM_001014432	Cluster1
chr6	33416541	33418288	NM_001014433	Cluster1
chr1	197912504	197930143	NM_001014434	Cluster1
chr16	66844928	66854146	NM_001014435	Cluster1
chr7	44044701	44069456	NM_001014436	Cluster1
chr11	3000928	3057423	NM_001014437	Cluster1
chr22	50530408	50532579	NM_001014440	Cluster1
chr13	23888867	23892103	NM_001014442	Cluster1
chr1	161159499	161165719	NM_001014443	Cluster1
chr17	35131321	35142251	NM_001014445	Cluster1
chr4	48885018	48906774	NM_001014446	Cluster1
chr4	8592764	8619752	NM_001014447	Cluster1
chr4	8592659	8619761	NM_001014448	Cluster1
chr16	70299052	70335279	NM_001014449	Cluster1
chr1	153112120	153113516	NM_001014450	Cluster1
chr16	70299052	70335279	NM_001014451	Cluster1
chr19	51345154	51354842	NM_001014763	Cluster1
chr17	3668722	3669669	NM_001014764	Cluster1
chr1	11654856	11663327	NM_001014765	Cluster1
chr11	6603773	6610868	NM_001014794	Cluster1
chr11	6603773	6610868	NM_001014795	Cluster1
chr1	162632463	162787405	NM_001014796	Cluster1
chr10	76869603	77637808	NM_001014797	Cluster1
chr4	5820763	5893086	NM_001014809	Cluster1
chr11	86441107	86672198	NM_001014811	Cluster1
chr15	64072558	64094008	NM_001014812	Cluster1
chr19	39125785	39182816	NM_001014831	Cluster1
chr19	39125785	39182816	NM_001014832	Cluster1
chr19	39125785	39182816	NM_001014834	Cluster1
chr19	39125785	39182816	NM_001014835	Cluster1
chr6	33416441	33418107	NM_001014837	Cluster1
chr6	33416441	33418107	NM_001014838	Cluster1
chr1	35557791	35566779	NM_001014839	Cluster1
chr6	33416441	33418107	NM_001014840	Cluster1
chr1	35557791	35566779	NM_001014841	Cluster1
chr14	24190037	24195441	NM_001014842	Cluster1
chr2	71331754	71435061	NM_001014972	Cluster1
chr1	196651877	196701565	NM_001014975	Cluster1
chr20	17699947	17735872	NM_001014977	Cluster1
chr16	30757422	30762062	NM_001014979	Cluster1
chr1	1242452	1246722	NM_001014980	Cluster1
chr17	4788963	4790589	NM_001014985	Cluster1
chr11	49145091	49208602	NM_001014986	Cluster1
chr16	28985051	28990784	NM_001014987	Cluster1
chr16	28985051	28990784	NM_001014988	Cluster1
chr16	28984802	28990784	NM_001014989	Cluster1
chr5	154941072	154969411	NM_001014990	Cluster1
chr16	29454532	29458219	NM_001014999	Cluster1
chr16	30193874	30197561	NM_001014999_r1	Cluster1
chr15	43692785	43699222	NM_001015001	Cluster1
chr16	78224	85844	NM_001015052	Cluster1
chr17	44076752	44123641	NM_001015053	Cluster1
chr16	77018	85851	NM_001015054	Cluster1
chr2	74425834	74441937	NM_001015055	Cluster1
chr17	59697305	59707598	NM_001015509	Cluster1
chr9	111631333	111654345	NM_001015882	Cluster1
chr20	57351561	57378463	NM_001015885	Cluster1
chr5	69350983	69369824	NM_001015891	Cluster1
chr17	35005989	35063707	NM_001017368	Cluster1
chr19	18990892	19033517	NM_001017392	Cluster1
chr2	95165808	95184316	NM_001017396	Cluster1
chr1	202193989	202319761	NM_001017403	Cluster1
chr4	1289890	1340137	NM_001017405	Cluster1
chr6	117560269	117602511	NM_001017408	Cluster1
chr10	95605942	95656711	NM_001017423	Cluster1
chr1	248906242	248919146	NM_001017434	Cluster1
chr22	30356634	30378655	NM_001017437	Cluster1
chr7	71779490	72337391	NM_001017440	Cluster1
chr12	107580873	107659642	NM_001017523	Cluster1
chr11	215029	236362	NM_001017524	Cluster1
chr22	44752557	44862784	NM_001017526	Cluster1
chr22	44668546	44737681	NM_001017528	Cluster1
chr22	44668546	44737681	NM_001017529	Cluster1
chr22	44676807	44737681	NM_001017530	Cluster1
chr12	47841536	47904994	NM_001017535	Cluster1
chr12	47841536	47904994	NM_001017536	Cluster1
chr17	63432303	63446184	NM_001017916	Cluster1
chr3	122359590	122383231	NM_001017928	Cluster1
chr12	57693954	57721557	NM_001017956	Cluster1
chr12	57693954	57721557	NM_001017957	Cluster1
chr12	57693954	57721557	NM_001017958	Cluster1
chr1	166069298	166167001	NM_001017961	Cluster1
chr14	102080741	102139749	NM_001017963	Cluster1
chr16	71626183	71641965	NM_001017967	Cluster1
chr5	132190146	132227853	NM_001017974	Cluster1
chr5	179837275	179858817	NM_001017987	Cluster1
chr19	45527426	45584802	NM_001017989	Cluster1
chr5	172333498	172454525	NM_001017995	Cluster1
chr1	14945918	15068155	NM_001017999	Cluster1
chr1	14924128	15068155	NM_001018000	Cluster1
chr1	14929799	15068155	NM_001018001	Cluster1
chr15	63042746	63071914	NM_001018007	Cluster1
chr3	15254355	15341380	NM_001018009	Cluster1
chr14	80955620	81108940	NM_001018036	Cluster1
chr9	77177533	77421537	NM_001018037	Cluster1
chr2	134964490	135024678	NM_001018044	Cluster1
chr2	134964490	135024678	NM_001018046	Cluster1
chr22	41525800	41544470	NM_001018050	Cluster1
chr22	41525800	41544489	NM_001018052	Cluster1
chr1	207053274	207081024	NM_001018053	Cluster1
chrX	155071419	155123074	NM_001018055	Cluster1
chr9	2621786	2660056	NM_001018056	Cluster1
chr7	115935152	116030763	NM_001018058	Cluster1
chr9	84668521	84877898	NM_001018066	Cluster1
chr1	67407809	67430402	NM_001018067	Cluster1
chr1	67407809	67430402	NM_001018068	Cluster1
chr5	143277930	143435512	NM_001018077	Cluster1
chr15	60419608	60479142	NM_001018089	Cluster1
chr15	57591903	57717557	NM_001018090	Cluster1
chr15	57591903	57717557	NM_001018091	Cluster1
chr15	57591903	57685364	NM_001018100	Cluster1
chr15	57706520	57717557	NM_001018102	Cluster1
chrX	15384800	15493333	NM_001018109	Cluster1
chr7	131500270	131556628	NM_001018111	Cluster1
chrX	14843404	14873069	NM_001018113	Cluster1
chr3	10026436	10101932	NM_001018115	Cluster1
chr9	100578078	100588387	NM_001018116	Cluster1
chr16	66802877	66830976	NM_001018159	Cluster1
chr16	18781294	18790334	NM_001019	Cluster1
chr1	30931505	31065717	NM_001020658	Cluster1
chr19	53866370	53876435	NM_001020820	Cluster1
chr19	41860254	41872925	NM_001022	Cluster1
chr6	28267009	28278223	NM_001023560	Cluster1
chr19	57435324	57447101	NM_001023561	Cluster1
chr19	57240631	57262728	NM_001023563	Cluster1
chr15	34525095	34583651	NM_001023567	Cluster1
chr3	183983752	184017884	NM_001023587	Cluster1
chr1	15764498	15775220	NM_001024215	Cluster1
chr14	66508146	67181800	NM_001024218	Cluster1
chr1	228082659	228099212	NM_001024226	Cluster1
chr1	228083149	228099212	NM_001024227	Cluster1
chr8	103140724	103230305	NM_001024372	Cluster1
chr16	28292524	28323849	NM_001024401	Cluster1
chr10	73423578	73433561	NM_001024593	Cluster1
chr3	46017008	46027483	NM_001024644	Cluster1
chr5	179698966	179731638	NM_001024649	Cluster1
chr3	124094680	124726325	NM_001024660	Cluster1
chr14	74084955	74201493	NM_001024674	Cluster1
chr1	29192656	29230934	NM_001024732	Cluster1
chr15	73684382	73714511	NM_001024736	Cluster1
chr19	35868573	35879792	NM_001024807	Cluster1
chr12	122021883	122062044	NM_001024808	Cluster1
chr17	40342165	40357643	NM_001024809	Cluster1
chr22	40044816	40335808	NM_001024843	Cluster1
chr11	44565662	44620358	NM_001024844	Cluster1
chr1	43996482	44031462	NM_001024845	Cluster1
chr3	44625035	44648471	NM_001024855	Cluster1
chr14	64746282	64823380	NM_001024858	Cluster1
chr19	42507305	42528481	NM_001024912	Cluster1
chr17	4833339	4898061	NM_001024937	Cluster1
chr22	23856933	23886312	NM_001024938	Cluster1
chr22	23857874	23886312	NM_001024939	Cluster1
chr7	66075818	66093573	NM_001024943	Cluster1
chr7	66075818	66093573	NM_001024944	Cluster1
chr7	66075818	66093573	NM_001024946	Cluster1
chr1	93448130	93554661	NM_001024948	Cluster1
chr11	66337338	66345104	NM_001024957	Cluster1
chr3	9792494	9807105	NM_001024959	Cluster1
chr3	9792494	9807105	NM_001024960	Cluster1
chr10	11165029	11336673	NM_001025076	Cluster1
chr10	11005311	11336673	NM_001025077	Cluster1
chr18	76978832	77017055	NM_001025081	Cluster1
chr18	37243044	37565798	NM_001025089	Cluster1
chr18	76978832	77017055	NM_001025090	Cluster1
chr5	149492981	149551439	NM_001025105	Cluster1
chr1	154582057	154627971	NM_001025107	Cluster1
chr1	207880971	207911125	NM_001025109	Cluster1
chr5	150401636	150412936	NM_001025158	Cluster1
chr5	150401636	150412936	NM_001025159	Cluster1
chr1	111229735	111243440	NM_001025199	Cluster1
chr2	174799312	175005381	NM_001025201	Cluster1
chr3	184174845	184184091	NM_001025205	Cluster1
chr11	844080	867116	NM_001025234	Cluster1
chr11	844445	867116	NM_001025237	Cluster1
chr1	229599193	229626122	NM_001025247	Cluster1
chr8	80034745	80080830	NM_001025252	Cluster1
chr6	43770210	43786486	NM_001025366	Cluster1
chr6	43770210	43786486	NM_001025367	Cluster1
chr6	43770210	43786486	NM_001025368	Cluster1
chr6	43770210	43786486	NM_001025369	Cluster1
chr6	43770210	43786486	NM_001025370	Cluster1
chr11	10455263	10507579	NM_001025389	Cluster1
chr11	10456055	10507579	NM_001025390	Cluster1
chr16	69709400	69726560	NM_001025433	Cluster1
chr16	69709400	69726560	NM_001025434	Cluster1
chr17	8435883	8468163	NM_001025579	Cluster1
chr4	152779936	152911911	NM_001025593	Cluster1
chr4	152779953	152912357	NM_001025595	Cluster1
chr11	47465936	47553132	NM_001025596	Cluster1
chr19	18001123	18014102	NM_001025604	Cluster1
chr19	49976466	50025548	NM_001025778	Cluster1
chr3	9809914	9836365	NM_001025930	Cluster1
chr7	45027633	45076470	NM_001029835	Cluster1
chr5	77210679	77428255	NM_001029851	Cluster1
chr5	77210679	77428255	NM_001029852	Cluster1
chr5	77210679	77428255	NM_001029853	Cluster1
chr5	77210679	77428255	NM_001029854	Cluster1
chr11	78171248	78188626	NM_001029859	Cluster1
chr20	958452	1002311	NM_001029871	Cluster1
chr2	26581204	26641366	NM_001029881	Cluster1
chr1	27534244	27603494	NM_001029882	Cluster1
chr8	134477787	134696555	NM_001029939	Cluster1
chr8	144930357	144950880	NM_001029976	Cluster1
chr15	64364303	64381441	NM_001029989	Cluster1
chr14	49570987	49586380	NM_001030001	Cluster1
chr20	44355698	44434595	NM_001030003	Cluster1
chr17	35587321	35726411	NM_001030006	Cluster1
chr16	71729001	71808834	NM_001030007	Cluster1
chr16	18781294	18790334	NM_001030009	Cluster1
chr10	120457226	120592065	NM_001030059	Cluster1
chr6	147508689	147570021	NM_001030060	Cluster1
chr11	13277726	13387265	NM_001030272	Cluster1
chr11	13277726	13387265	NM_001030273	Cluster1
chr11	67662161	67681224	NM_001031615	Cluster1
chr7	964851	975549	NM_001031617	Cluster1
chr7	102551231	102562310	NM_001031618	Cluster1
chr7	102650324	102661400	NM_001031618_r1	Cluster1
chr6	57090187	57170304	NM_001031623	Cluster1
chr19	52949389	52962881	NM_001031665	Cluster1
chr1	54169657	54200030	NM_001031672	Cluster1
chr1	24899510	24965010	NM_001031680	Cluster1
chr17	3636467	3663103	NM_001031681	Cluster1
chr1	223779892	223845947	NM_001031685	Cluster1
chr7	143353399	143362713	NM_001031690	Cluster1
chr19	40348424	40378490	NM_001031696	Cluster1
chr12	49623413	49644669	NM_001031698	Cluster1
chr12	103772309	103841234	NM_001031701	Cluster1
chr3	47495639	47513712	NM_001031703	Cluster1
chr5	172834250	172952682	NM_001031711	Cluster1
chr6	125986539	126039274	NM_001031712	Cluster1
chr6	13786548	13814560	NM_001031713	Cluster1
chr14	104689617	104722535	NM_001031714	Cluster1
chr3	9933833	9945406	NM_001031717	Cluster1
chr13	51770776	51804163	NM_001031719	Cluster1
chr19	51927471	51946621	NM_001031721	Cluster1
chr6	30626873	30646821	NM_001031722	Cluster1
chr19	29698885	29715056	NM_001031726	Cluster1
chr19	13764521	13774282	NM_001031727	Cluster1
chr4	68310386	68350090	NM_001031732	Cluster1
chr15	68190704	68206110	NM_001031733	Cluster1
chr10	49014235	49115522	NM_001031746	Cluster1
chr22	31248383	31277638	NM_001031801	Cluster1
chr17	75525696	75575209	NM_001031803	Cluster1
chr17	19648750	19677596	NM_001031806	Cluster1
chr19	42902085	42917894	NM_001031850	Cluster1
chr11	44047980	44059977	NM_001031854	Cluster1
chr12	98515589	98550350	NM_001032283	Cluster1
chr12	98515589	98550350	NM_001032284	Cluster1
chr12	95030408	95073618	NM_001032287	Cluster1
chr20	50081123	50113150	NM_001032288	Cluster1
chr17	32350137	32370449	NM_001032293	Cluster1
chr11	57598210	57614848	NM_001032295	Cluster1
chr13	98450198	98577151	NM_001032296	Cluster1
chr1	19596978	19629820	NM_001032363	Cluster1
chr15	40844476	40858207	NM_001032367	Cluster1
chr19	44165163	44177685	NM_001032372	Cluster1
chr19	44165095	44177685	NM_001032373	Cluster1
chr19	44165095	44175429	NM_001032374	Cluster1
chr12	55997275	56005525	NM_001032386	Cluster1
chr12	55997275	56005525	NM_001032387	Cluster1
chr16	25111741	25178228	NM_001032391	Cluster1
chr21	29024616	29054486	NM_001032410	Cluster1
chr1	21727845	21783199	NM_001032730	Cluster1
chr20	33490095	33650030	NM_001032999	Cluster1
chr11	4094798	4138932	NM_001033	Cluster1
chr17	5419640	5433020	NM_001033002	Cluster1
chr8	11982320	11984590	NM_001033017	Cluster1
chr8	11973936	11974599	NM_001033018	Cluster1
chr22	32475236	32498831	NM_001033024	Cluster1
chr1	100872390	100894842	NM_001033025	Cluster1
chr19	1009652	1021123	NM_001033026	Cluster1
chr15	22867052	22917313	NM_001033028	Cluster1
chr3	138608770	138633371	NM_001033030	Cluster1
chr3	138608770	138633371	NM_001033031	Cluster1
chr3	138608770	138633371	NM_001033032	Cluster1
chr1	182378097	182391790	NM_001033044	Cluster1
chr2	174431571	174487029	NM_001033045	Cluster1
chr17	82442585	82450752	NM_001033046	Cluster1
chr4	105895470	105971671	NM_001033047	Cluster1
chr12	106977276	106987146	NM_001033050	Cluster1
chr17	5501395	5584509	NM_001033053	Cluster1
chr17	6423737	6435121	NM_001033054	Cluster1
chr17	6423737	6435121	NM_001033055	Cluster1
chr1	182378092	182391404	NM_001033056	Cluster1
chr3	65353525	66038918	NM_001033057	Cluster1
chr6	132617149	132624275	NM_001033080	Cluster1
chr1	39895427	39901917	NM_001033081	Cluster1
chr1	39895427	39901917	NM_001033082	Cluster1
chr10	68285080	68332928	NM_001033083	Cluster1
chr20	15196839	16053196	NM_001033087	Cluster1
chr15	90265671	90272211	NM_001033088	Cluster1
chr5	139342433	139369720	NM_001033112	Cluster1
chr9	137434363	137441357	NM_001033113	Cluster1
chr3	8980590	9249646	NM_001033117	Cluster1
chr5	134601148	134632828	NM_001033503	Cluster1
chr17	32927909	32941649	NM_001033504	Cluster1
chr11	33141430	33161491	NM_001033505	Cluster1
chr11	33141430	33161491	NM_001033506	Cluster1
chr7	5190232	5233839	NM_001033518	Cluster1
chr7	5190232	5233839	NM_001033519	Cluster1
chr7	5214268	5233855	NM_001033520	Cluster1
chr20	56392370	56404526	NM_001033521	Cluster1
chr20	56392644	56406362	NM_001033522	Cluster1
chr19	17267375	17279353	NM_001033549	Cluster1
chr17	17843510	17972400	NM_001033551	Cluster1
chr17	20087021	20314759	NM_001033553	Cluster1
chr17	20156071	20239430	NM_001033554	Cluster1
chr17	20156071	20319026	NM_001033555	Cluster1
chr2	44168874	44231472	NM_001033557	Cluster1
chr15	55430307	55508234	NM_001033559	Cluster1
chr15	55417755	55508234	NM_001033560	Cluster1
chr17	28905250	28951518	NM_001033561	Cluster1
chr6	112087590	112102790	NM_001033564	Cluster1
chr17	32142453	32225771	NM_001033566	Cluster1
chr17	32142453	32225771	NM_001033567	Cluster1
chr17	32142453	32225771	NM_001033568	Cluster1
chr17	68248003	68257164	NM_001033569	Cluster1
chr17	68248003	68257164	NM_001033570	Cluster1
chr17	68248003	68257164	NM_001033571	Cluster1
chr17	68248003	68257164	NM_001033572	Cluster1
chr17	68248003	68257164	NM_001033574	Cluster1
chr2	240560053	240564014	NM_001033575	Cluster1
chr17	35147816	35189343	NM_001033576	Cluster1
chr8	66712780	66862022	NM_001033578	Cluster1
chr17	36513073	36535457	NM_001033580	Cluster1
chr1	2073461	2185399	NM_001033581	Cluster1
chr1	2104715	2185399	NM_001033582	Cluster1
chrX	23701055	23743276	NM_001033583	Cluster1
chr13	29024456	29505947	NM_001033602	Cluster1
chr7	33129539	33606068	NM_001033604	Cluster1
chr7	33129539	33606068	NM_001033605	Cluster1
chr1	160796173	160802746	NM_001033667	Cluster1
chr12	120640618	120667324	NM_001033677	Cluster1
chr11	64223815	64226186	NM_001033678	Cluster1
chr12	6556870	6568291	NM_001033714	Cluster1
chr19	43872364	43880136	NM_001033719	Cluster1
chr8	80628450	80874781	NM_001033723	Cluster1
chr6	43770210	43786486	NM_001033756	Cluster1
chr22	39312881	39319623	NM_001033853	Cluster1
chr10	14904612	14954096	NM_001033855	Cluster1
chr10	14904612	14954096	NM_001033857	Cluster1
chr10	14904612	14954096	NM_001033858	Cluster1
chr17	7219830	7225267	NM_001033859	Cluster1
chr12	51245348	51270210	NM_001033873	Cluster1
chr10	44375866	44385097	NM_001033886	Cluster1
chr1	211326832	211374944	NM_001033910	Cluster1
chr10	119573465	119597029	NM_001033925	Cluster1
chr19	18571856	18577550	NM_001033930	Cluster1
chr11	14968501	14972286	NM_001033952	Cluster1
chr11	14966668	14972286	NM_001033953	Cluster1
chr5	170504019	170736632	NM_001034837	Cluster1
chr5	170353486	170736632	NM_001034838	Cluster1
chr5	16473037	16617058	NM_001034850	Cluster1
chr2	95346657	95386077	NM_001034914	Cluster1
chr10	95311772	95441180	NM_001034954	Cluster1
chr10	95311772	95441180	NM_001034955	Cluster1
chr10	95311772	95441180	NM_001034956	Cluster1
chr10	95311772	95441180	NM_001034957	Cluster1
chr3	40457338	40468587	NM_001034996	Cluster1
chr5	140550066	140558093	NM_001035235	Cluster1
chr22	19449910	19479193	NM_001035247	Cluster1
chr9	127940581	127980989	NM_001035254	Cluster1
chr2	74135399	74147912	NM_001035505	Cluster1
chr2	27051667	27059535	NM_001035507	Cluster1
chr1	161314380	161375340	NM_001035511	Cluster1
chr1	161314380	161375340	NM_001035512	Cluster1
chr1	161314380	161375340	NM_001035513	Cluster1
chr2	27325848	27357034	NM_001035521	Cluster1
chr9	127505343	127579031	NM_001035534	Cluster1
chr19	35030469	35040449	NM_001037	Cluster1
chr16	1398300	1414704	NM_001037125	Cluster1
chr7	133253066	133484192	NM_001037126	Cluster1
chr2	235494042	236131793	NM_001037131	Cluster1
chr7	108147648	108456436	NM_001037132	Cluster1
chr17	7932205	7949920	NM_001037144	Cluster1
chr2	10056798	10080411	NM_001037160	Cluster1
chr14	73537142	73543796	NM_001037161	Cluster1
chr14	73616843	73619888	NM_001037162	Cluster1
chr7	6329410	6348967	NM_001037163	Cluster1
chr7	12686826	12690933	NM_001037164	Cluster1
chr7	4682294	4771442	NM_001037165	Cluster1
chrX	23701055	23743276	NM_001037171	Cluster1
chr3	141231824	141294924	NM_001037172	Cluster1
chr2	151798796	151828421	NM_001037174	Cluster1
chr1	223234915	223364176	NM_001037175	Cluster1
chr11	64938229	64972108	NM_001037225	Cluster1
chr19	36888123	36916291	NM_001037232	Cluster1
chr1	235328437	235344529	NM_001037277	Cluster1
chr1	235328569	235344529	NM_001037278	Cluster1
chr16	67660959	67662774	NM_001037281	Cluster1
chr7	2354826	2380742	NM_001037283	Cluster1
chr14	23377045	23379772	NM_001037288	Cluster1
chr11	112176365	112218933	NM_001037290	Cluster1
chr9	109640787	109951476	NM_001037293	Cluster1
chr11	134248281	134253352	NM_001037304	Cluster1
chr11	134248281	134253352	NM_001037305	Cluster1
chr1	98890244	99004861	NM_001037317	Cluster1
chr3	184276021	184293031	NM_001037324	Cluster1
chr17	65635536	65826451	NM_001037325	Cluster1
chr20	49113338	49188370	NM_001037328	Cluster1
chr11	6239088	6244479	NM_001037329	Cluster1
chr17	18722022	18736119	NM_001037330	Cluster1
chr18	75409475	75427703	NM_001037331	Cluster1
chr5	157266122	157395594	NM_001037333	Cluster1
chr18	158556	214629	NM_001037334	Cluster1
chr20	63558085	63574239	NM_001037335	Cluster1
chr1	66332107	66374579	NM_001037339	Cluster1
chr1	65992615	66374579	NM_001037340	Cluster1
chr1	65792509	66374579	NM_001037341	Cluster1
chrX	18442223	18653629	NM_001037343	Cluster1
chr8	7990414	7997521	NM_001037380	Cluster1
chr8	7312845	7319951	NM_001037380_r1	Cluster1
chr4	70721963	70808619	NM_001037442	Cluster1
chr12	120469841	120498493	NM_001037494	Cluster1
chr12	120496112	120498493	NM_001037495	Cluster1
chr6	50018842	50021994	NM_001037497	Cluster1
chr6	49960248	49964164	NM_001037499	Cluster1
chr20	31465505	31473013	NM_001037500	Cluster1
chr1	120415026	120469670	NM_001037501	Cluster1
chrX	17737448	17754988	NM_001037535	Cluster1
chrX	17737492	17754985	NM_001037536	Cluster1
chr10	13277795	13299746	NM_001037537	Cluster1
chrX	17737492	17754985	NM_001037540	Cluster1
chr21	43925397	43987590	NM_001037553	Cluster1
chr11	124919249	124920677	NM_001037558	Cluster1
chr4	82629538	82798796	NM_001037582	Cluster1
chr2	203867770	203873965	NM_001037631	Cluster1
chr5	138946723	139198368	NM_001037633	Cluster1
chr5	73498424	73505623	NM_001037637	Cluster1
chr3	183829270	183884880	NM_001037639	Cluster1
chr2	206159593	206162929	NM_001037663	Cluster1
chr22	30285116	30289505	NM_001037666	Cluster1
chr8	7495845	7509311	NM_001037668	Cluster1
chr8	7811719	7815716	NM_001037668_r1	Cluster1
chr12	92702842	92708549	NM_001037671	Cluster1
chr1	149054032	149082311	NM_001037675	Cluster1
chr6	50009137	50021981	NM_001037728	Cluster1
chr6	49968676	49969625	NM_001037729	Cluster1
chr20	31257663	31259632	NM_001037730	Cluster1
chr20	31303211	31308585	NM_001037731	Cluster1
chr20	187852	189711	NM_001037732	Cluster1
chrX	48058177	48071141	NM_001037735	Cluster1
chr5	171387848	171407125	NM_001037738	Cluster1
chr7	7357874	7535873	NM_001037763	Cluster1
chr18	47231122	47251660	NM_001037802	Cluster1
chr8	12064388	12071747	NM_001037804	Cluster1
chr8	12310961	12318316	NM_001037804_r1	Cluster1
chr12	49791151	49828413	NM_001037806	Cluster1
chr16	28379581	28403888	NM_001037808	Cluster1
chr16	28711416	28735729	NM_001037808_r1	Cluster1
chrX	53431257	53434376	NM_001037811	Cluster1
chr19	44072158	44089613	NM_001037813	Cluster1
chr22	16961935	17008222	NM_001037814	Cluster1
chr2	109792757	109833019	NM_001037866	Cluster1
chr2	110538487	110578732	NM_001037866_r1	Cluster1
chr2	99400476	99490017	NM_001037872	Cluster1
chr11	111937342	112022652	NM_001037954	Cluster1
chrX	55009054	55030977	NM_001037967	Cluster1
chrX	55009054	55030977	NM_001037968	Cluster1
chr17	81244810	81295307	NM_001037984	Cluster1
chr5	69415115	69444330	NM_001038603	Cluster1
chr17	82458197	82490537	NM_001038618	Cluster1
chr1	37611349	37634892	NM_001038633	Cluster1
chr15	74069856	74082550	NM_001038640	Cluster1
chr1	151050970	151059649	NM_001038707	Cluster1
chr16	23182744	23216883	NM_001039	Cluster1
chr12	1820564	1836753	NM_001039029	Cluster1
chr17	46334901	46361766	NM_001039083	Cluster1
chr17	46552755	46579691	NM_001039083_r1	Cluster1
chrX	12791354	12824227	NM_001039091	Cluster1
chr3	32817996	32897824	NM_001039111	Cluster1
chr8	123851986	124120061	NM_001039112	Cluster1
chr4	124500	164162	NM_001039127	Cluster1
chr17	8039039	8049133	NM_001039130	Cluster1
chr17	8039058	8049133	NM_001039131	Cluster1
chr19	10286954	10288520	NM_001039132	Cluster1
chr20	3753507	3767753	NM_001039140	Cluster1
chr22	37697047	37776556	NM_001039141	Cluster1
chr1	192316991	192367284	NM_001039152	Cluster1
chr11	3225029	3232417	NM_001039165	Cluster1
chr7	99458157	99466167	NM_001039178	Cluster1
chr16	29453589	29454324	NM_001039182	Cluster1
chr16	30192931	30193666	NM_001039182_r1	Cluster1
chr20	44475873	44494603	NM_001039199	Cluster1
chrX	111681169	111690170	NM_001039210	Cluster1
chr1	1449688	1470162	NM_001039211	Cluster1
chr19	44699150	44710718	NM_001039213	Cluster1
chr2	55865966	55923782	NM_001039348	Cluster1
chr2	55865966	55923782	NM_001039349	Cluster1
chr7	153887333	154894285	NM_001039350	Cluster1
chr14	100291115	100306444	NM_001039355	Cluster1
chr18	48026671	48137148	NM_001039360	Cluster1
chr1	12892895	12898270	NM_001039361	Cluster1
chr2	10721629	10785110	NM_001039362	Cluster1
chr22	17592135	17628822	NM_001039366	Cluster1
chr22	17592135	17628822	NM_001039367	Cluster1
chr7	93188533	93226469	NM_001039372	Cluster1
chr9	136796337	136807741	NM_001039374	Cluster1
chr20	13785027	13821580	NM_001039375	Cluster1
chr9	4598315	4666480	NM_001039395	Cluster1
chr11	59208509	59212927	NM_001039396	Cluster1
chr17	18635528	18644427	NM_001039397	Cluster1
chr1	43974959	43978295	NM_001039457	Cluster1
chr7	36852905	36985112	NM_001039459	Cluster1
chr1	54641785	54710266	NM_001039464	Cluster1
chr14	69767141	69772005	NM_001039465	Cluster1
chr20	64073180	64079964	NM_001039467	Cluster1
chr11	63838927	63911020	NM_001039469	Cluster1
chr16	85804	138698	NM_001039476	Cluster1
chr1	27872542	27886685	NM_001039477	Cluster1
chr14	74661255	74713080	NM_001039479	Cluster1
chr12	22625170	22645110	NM_001039481	Cluster1
chr11	832951	838835	NM_001039490	Cluster1
chr2	105357715	105399051	NM_001039492	Cluster1
chr11	64300357	64304770	NM_001039496	Cluster1
chr1	20290874	20359518	NM_001039500	Cluster1
chr16	31083423	31088809	NM_001039503	Cluster1
chr20	1629151	1657779	NM_001039508	Cluster1
chr2	174747594	174764472	NM_001039523	Cluster1
chr18	50375045	50394168	NM_001039535	Cluster1
chr2	209424046	209734112	NM_001039538	Cluster1
chr3	142157526	142225585	NM_001039547	Cluster1
chr11	75422393	75430629	NM_001039548	Cluster1
chr2	219279365	219286895	NM_001039550	Cluster1
chrY	20756107	20781032	NM_001039567	Cluster1
chr2	223755325	223837582	NM_001039569	Cluster1
chr22	29073034	29146820	NM_001039570	Cluster1
chr17	77140968	77217099	NM_001039573	Cluster1
chr1	110210313	110234044	NM_001039574	Cluster1
chr1	1392287	1399342	NM_001039577	Cluster1
chr4	155342659	155376965	NM_001039580	Cluster1
chrX	153669732	153674361	NM_001039582	Cluster1
chr22	38057254	38075701	NM_001039583	Cluster1
chr22	38057254	38075701	NM_001039584	Cluster1
chr1	78490973	78540701	NM_001039585	Cluster1
chr1	43970009	43973369	NM_001039589	Cluster1
chrX	41085444	41236579	NM_001039590	Cluster1
chrX	41085444	41236579	NM_001039591	Cluster1
chr9	35809794	35812262	NM_001039592	Cluster1
chr2	9474550	9489727	NM_001039613	Cluster1
chr15	73735430	73751475	NM_001039614	Cluster1
chr8	12089337	12115516	NM_001039615	Cluster1
chr3	196197451	196211400	NM_001039617	Cluster1
chr11	85657990	85665129	NM_001039618	Cluster1
chr14	22920528	22929376	NM_001039619	Cluster1
chr13	19837452	19863636	NM_001039649	Cluster1
chr13	19837452	19863636	NM_001039650	Cluster1
chr6	31762995	31764847	NM_001039651	Cluster1
chr11	68736131	68751520	NM_001039656	Cluster1
chr11	71998911	72002528	NM_001039659	Cluster1
chr11	71998908	72002804	NM_001039660	Cluster1
chr11	126283086	126294933	NM_001039661	Cluster1
chr1	6464110	6466195	NM_001039664	Cluster1
chr19	8364154	8374370	NM_001039667	Cluster1
chr12	6538960	6556042	NM_001039670	Cluster1
chr19	38303557	38315780	NM_001039671	Cluster1
chr19	38303557	38315947	NM_001039672	Cluster1
chr19	38303557	38315947	NM_001039673	Cluster1
chr15	90930179	90954093	NM_001039675	Cluster1
chr16	69118009	69132588	NM_001039690	Cluster1
chr2	199928912	199955491	NM_001039693	Cluster1
chr9	15422783	15461629	NM_001039697	Cluster1
chr10	15043942	15073853	NM_001039702	Cluster1
chr1	146064698	146144804	NM_001039703	Cluster1
chrX	54920823	54931431	NM_001039705	Cluster1
chr7	90245173	90311063	NM_001039706	Cluster1
chr9	136401921	136410614	NM_001039707	Cluster1
chr9	136401921	136410614	NM_001039708	Cluster1
chr20	33562364	33650031	NM_001039709	Cluster1
chr1	161120977	161132688	NM_001039711	Cluster1
chr1	161120977	161132466	NM_001039712	Cluster1
chr1	53894186	53911086	NM_001039715	Cluster1
chr1	53894186	53911086	NM_001039716	Cluster1
chr4	127965405	128031776	NM_001039717	Cluster1
chr2	168802589	168865339	NM_001039724	Cluster1
chr11	63289902	63311782	NM_001039752	Cluster1
chr2	54725011	54972020	NM_001039753	Cluster1
chr10	127135429	127196591	NM_001039762	Cluster1
chr5	110419495	110726671	NM_001039763	Cluster1
chr3	33090422	33097146	NM_001039770	Cluster1
chr14	24426545	24429668	NM_001039771	Cluster1
chr1	26321858	26354130	NM_001039775	Cluster1
chr5	132747425	132754403	NM_001039780	Cluster1
chr9	35906201	35907136	NM_001039792	Cluster1
chr1	22052708	22101360	NM_001039802	Cluster1
chr9	87966443	87974780	NM_001039803	Cluster1
chrX	73563147	73687109	NM_001039840	Cluster1
chr15	30626147	30638810	NM_001039841	Cluster1
chr17	81665035	81666605	NM_001039842	Cluster1
chr10	15075474	15088776	NM_001039844	Cluster1
chr2	206737764	206765328	NM_001039845	Cluster1
chr19	2096914	2099590	NM_001039846	Cluster1
chr19	1103993	1106779	NM_001039847	Cluster1
chr19	1104649	1106779	NM_001039848	Cluster1
chr19	36003306	36008813	NM_001039876	Cluster1
chr19	46719510	46746450	NM_001039877	Cluster1
chr19	46746056	46758575	NM_001039885	Cluster1
chr19	52527667	52556336	NM_001039886	Cluster1
chr19	35758175	35771166	NM_001039887	Cluster1
chr1	145959440	145964575	NM_001039888	Cluster1
chrX	46497724	46545421	NM_001039891	Cluster1
chr15	40250664	40252909	NM_001039905	Cluster1
chr12	6666476	6689572	NM_001039920	Cluster1
chr17	63928739	63932331	NM_001039933	Cluster1
chr7	29479711	29514335	NM_001039936	Cluster1
chr13	51361576	51453036	NM_001039937	Cluster1
chr13	51436423	51453036	NM_001039938	Cluster1
chr22	24806210	24927578	NM_001039948	Cluster1
chr15	89776331	89778751	NM_001039958	Cluster1
chr12	51424830	51515763	NM_001039960	Cluster1
chr7	1086806	1093815	NM_001039966	Cluster1
chr11	18727927	18791798	NM_001039970	Cluster1
chr17	18968790	19004764	NM_001039999	Cluster1
chr17	43640389	43661922	NM_001040002	Cluster1
chr5	146447332	146511959	NM_001040006	Cluster1
chr20	958452	1002311	NM_001040007	Cluster1
chr8	10672627	10700590	NM_001040032	Cluster1
chr10	47467993	47484115	NM_001040084	Cluster1
chr4	4386255	4419058	NM_001040101	Cluster1
chr10	96343215	96359365	NM_001040102	Cluster1
chr10	96343215	96359365	NM_001040103	Cluster1
chr12	110648685	110689777	NM_001040107	Cluster1
chr14	75013774	75051467	NM_001040108	Cluster1
chr16	15703134	15857028	NM_001040113	Cluster1
chr16	15703134	15857030	NM_001040114	Cluster1
chr11	72685068	72752389	NM_001040118	Cluster1
chr1	19312325	19329300	NM_001040125	Cluster1
chr1	19312325	19329300	NM_001040126	Cluster1
chr19	708934	748329	NM_001040134	Cluster1
chr7	152759748	152855379	NM_001040135	Cluster1
chr16	66552562	66566287	NM_001040138	Cluster1
chr16	69118008	69132588	NM_001040144	Cluster1
chr16	69118009	69132159	NM_001040146	Cluster1
chr5	135334380	135399238	NM_001040158	Cluster1
chr19	53395148	53412009	NM_001040185	Cluster1
chr1	11736084	11750771	NM_001040194	Cluster1
chr1	11736084	11750771	NM_001040195	Cluster1
chr1	11736084	11750771	NM_001040196	Cluster1
chr1	11736084	11750771	NM_001040197	Cluster1
chr1	150996535	151006902	NM_001040217	Cluster1
chr6	14117771	14136917	NM_001040280	Cluster1
chr16	50152910	50235308	NM_001040284	Cluster1
chr16	50152910	50235308	NM_001040285	Cluster1
chr21	41798224	41879344	NM_001040424	Cluster1
chr16	1809097	1827194	NM_001040427	Cluster1
chr16	1706194	1770317	NM_001040439	Cluster1
chr1	32539426	32605941	NM_001040441	Cluster1
chr2	238426926	238452250	NM_001040445	Cluster1
chr5	32227006	32312939	NM_001040446	Cluster1
chr5	179559730	179610012	NM_001040451	Cluster1
chr5	179559730	179610012	NM_001040452	Cluster1
chr3	48625722	48633846	NM_001040454	Cluster1
chr11	117178742	117197442	NM_001040455	Cluster1
chr7	75879033	75888926	NM_001040456	Cluster1
chr7	75878991	75888926	NM_001040457	Cluster1
chr15	100566923	100602184	NM_001040616	Cluster1
chr1	212608760	212620774	NM_001040619	Cluster1
chr8	101686541	102124334	NM_001040624	Cluster1
chr8	101686541	102124334	NM_001040625	Cluster1
chr8	101686541	102124334	NM_001040626	Cluster1
chr8	101686541	102124334	NM_001040627	Cluster1
chr8	101686541	102124334	NM_001040628	Cluster1
chr8	101686541	102124334	NM_001040629	Cluster1
chr8	101686541	102124907	NM_001040630	Cluster1
chr7	151556114	151814871	NM_001040633	Cluster1
chr7	66114817	66154566	NM_001040647	Cluster1
chr7	66114817	66154566	NM_001040648	Cluster1
chr3	126458900	126475919	NM_001040653	Cluster1
chr7	5282942	5306860	NM_001040661	Cluster1
chr19	10106361	10115372	NM_001040664	Cluster1
chr11	62124010	62153166	NM_001040694	Cluster1
chr11	18529608	18588734	NM_001040697	Cluster1
chr1	109466545	109482134	NM_001040709	Cluster1
chr2	24175052	24191698	NM_001040710	Cluster1
chr11	66848419	66958383	NM_001040716	Cluster1
chr15	73443163	73560012	NM_001042367	Cluster1
chr9	133097721	133149210	NM_001042368	Cluster1
chr1	193059873	193091776	NM_001042369	Cluster1
chr1	193059873	193091776	NM_001042370	Cluster1
chr11	2146622	2161209	NM_001042376	Cluster1
chr13	19702500	19783036	NM_001042414	Cluster1
chr10	68377192	68407294	NM_001042417	Cluster1
chr4	1871392	1982192	NM_001042424	Cluster1
chr2	26786014	26794587	NM_001042426	Cluster1
chr14	75069640	75079988	NM_001042430	Cluster1
chr16	28477278	28492074	NM_001042432	Cluster1
chr2	85837119	85867670	NM_001042437	Cluster1
chr20	33217309	33227806	NM_001042439	Cluster1
chr17	18952164	19022595	NM_001042450	Cluster1
chr11	695590	704131	NM_001042463	Cluster1
chr10	71816297	71851251	NM_001042465	Cluster1
chr10	71816297	71851251	NM_001042466	Cluster1
chr2	237487250	237555322	NM_001042467	Cluster1
chr17	39904594	39918650	NM_001042471	Cluster1
chr20	25300213	25390835	NM_001042472	Cluster1
chr16	8852941	8868401	NM_001042476	Cluster1
chr14	51489127	51730726	NM_001042481	Cluster1
chr20	36461467	36528633	NM_001042486	Cluster1
chr15	34229783	34338057	NM_001042495	Cluster1
chr14	94462720	94476197	NM_001042518	Cluster1
chr19	38390199	38399883	NM_001042522	Cluster1
chr3	97941816	97972451	NM_001042533	Cluster1
chr7	151086474	151123638	NM_001042535	Cluster1
chr11	15114922	15247208	NM_001042536	Cluster1
chr1	46635038	46668427	NM_001042546	Cluster1
chr2	36552260	36598168	NM_001042548	Cluster1
chr1	212726152	212791777	NM_001042549	Cluster1
chr12	69470387	69579791	NM_001042555	Cluster1
chr11	10797045	10809035	NM_001042559	Cluster1
chr15	92900323	92949233	NM_001042572	Cluster1
chr17	79074823	79088599	NM_001042573	Cluster1
chr15	90529922	90645345	NM_001042574	Cluster1
chr20	17613677	17682283	NM_001042576	Cluster1
chr9	35829224	35854847	NM_001042589	Cluster1
chr9	35829227	35865515	NM_001042590	Cluster1
chr19	38587640	38617953	NM_001042600	Cluster1
chr12	280056	389320	NM_001042603	Cluster1
chr16	90004870	90019456	NM_001042610	Cluster1
chr5	35904287	35938622	NM_001042625	Cluster1
chr20	45833798	45843276	NM_001042632	Cluster1
chr20	45833798	45843276	NM_001042633	Cluster1
chr3	42091356	42225890	NM_001042646	Cluster1
chr1	6466091	6490580	NM_001042664	Cluster1
chr1	6466091	6485954	NM_001042665	Cluster1
chr1	8352403	8817640	NM_001042681	Cluster1
chr1	8352403	8423832	NM_001042682	Cluster1
chr17	20449394	20467535	NM_001042685	Cluster1
chr1	52633167	52657065	NM_001042693	Cluster1
chr1	16022035	16034050	NM_001042704	Cluster1
chr19	38433690	38587564	NM_001042723	Cluster1
chr19	44846296	44889223	NM_001042724	Cluster1
chr4	109433714	109540459	NM_001042734	Cluster1
chr1	32274110	32286167	NM_001042771	Cluster1
chr11	1919702	1938702	NM_001042780	Cluster1
chr11	1919702	1938702	NM_001042781	Cluster1
chr11	1919702	1938702	NM_001042782	Cluster1
chr16	55656439	55703788	NM_001043	Cluster1
chr11	62665311	62668108	NM_001043229	Cluster1
chr14	73715121	73787208	NM_001043318	Cluster1
chr1	154155307	154183218	NM_001043351	Cluster1
chr1	154155307	154183218	NM_001043352	Cluster1
chr1	154155307	154183218	NM_001043353	Cluster1
chr5	1392795	1445440	NM_001044	Cluster1
chr9	35752990	35754276	NM_001044264	Cluster1
chr6	70667882	70861993	NM_001044305	Cluster1
chr18	74435727	74457268	NM_001044369	Cluster1
chr22	43412013	43507848	NM_001044370	Cluster1
chr2	201620185	201643503	NM_001044385	Cluster1
chr19	7069702	7087967	NM_001044387	Cluster1
chr19	7069702	7087967	NM_001044388	Cluster1
chr1	155185823	155192909	NM_001044390	Cluster1
chr1	155185823	155192909	NM_001044391	Cluster1
chr1	155185823	155192909	NM_001044392	Cluster1
chr1	155185823	155192909	NM_001044393	Cluster1
chr5	123545416	123617044	NM_001044723	Cluster1
chr17	30194318	30235697	NM_001045	Cluster1
chr9	124853459	124857877	NM_001045476	Cluster1
chr9	96928842	96942971	NM_001045477	Cluster1
chr8	133036727	133102602	NM_001045556	Cluster1
chr8	133036727	133102602	NM_001045557	Cluster1
chr5	6633439	6674383	NM_001047	Cluster1
chr10	5412556	5459056	NM_001047160	Cluster1
chr3	16257060	16264943	NM_001047434	Cluster1
chr1	119834764	119844880	NM_001047980	Cluster1
chr1	45329241	45340440	NM_001048171	Cluster1
chr1	45329241	45340115	NM_001048172	Cluster1
chr1	45329241	45340115	NM_001048173	Cluster1
chr1	45329241	45339970	NM_001048174	Cluster1
chr1	28369739	28500364	NM_001048183	Cluster1
chr1	28518225	28539294	NM_001048194	Cluster1
chr1	28518225	28539294	NM_001048195	Cluster1
chr19	4909500	4962154	NM_001048201	Cluster1
chr11	131370614	132336822	NM_001048209	Cluster1
chr1	108929505	108963484	NM_001048210	Cluster1
chr11	65525082	65538704	NM_001048218	Cluster1
chr1	203127725	203167405	NM_001048230	Cluster1
chr11	59852807	59866487	NM_001062	Cluster1
chr3	133746392	133796641	NM_001063	Cluster1
chr3	53224711	53256022	NM_001064	Cluster1
chr1	12166990	12209220	NM_001066	Cluster1
chr18	657652	673577	NM_001071	Cluster1
chr13	72708366	72727629	NM_001071775	Cluster1
chr6	39904169	39934462	NM_001075098	Cluster1
chr19	20619938	20661571	NM_001076675	Cluster1
chr9	36190920	36212059	NM_001076677	Cluster1
chr17	44205040	44220882	NM_001076683	Cluster1
chr17	44205040	44219675	NM_001076684	Cluster1
chr3	58564117	58577391	NM_001076778	Cluster1
chr6	27388717	27403907	NM_001076781	Cluster1
chr16	68264525	68301819	NM_001076785	Cluster1
chr11	32892810	32980268	NM_001076786	Cluster1
chr16	21599475	21657473	NM_001077180	Cluster1
chr9	96500112	96566831	NM_001077181	Cluster1
chr17	81528376	81537130	NM_001077182	Cluster1
chr16	2047894	2088720	NM_001077183	Cluster1
chr19	50203621	50310540	NM_001077186	Cluster1
chr1	23359447	23369836	NM_001077195	Cluster1
chr2	219219379	219229636	NM_001077198	Cluster1
chr4	82818508	82891280	NM_001077206	Cluster1
chr4	82818508	82891153	NM_001077207	Cluster1
chr4	82818508	82891280	NM_001077208	Cluster1
chr19	2328683	2355095	NM_001077238	Cluster1
chr11	117232735	117285688	NM_001077239	Cluster1
chr12	124324414	124567612	NM_001077261	Cluster1
chr1	26282281	26306704	NM_001077262	Cluster1
chr11	117900640	117929402	NM_001077263	Cluster1
chr2	174559573	174682899	NM_001077269	Cluster1
chr19	20004417	20039255	NM_001077349	Cluster1
chr16	85385	138673	NM_001077350	Cluster1
chr14	22893203	22919149	NM_001077351	Cluster1
chr14	22893203	22919149	NM_001077352	Cluster1
chr9	131502917	131523799	NM_001077365	Cluster1
chr9	131502917	131523799	NM_001077366	Cluster1
chr12	51912382	51923361	NM_001077401	Cluster1
chr3	9933833	9945406	NM_001077415	Cluster1
chr16	75538116	75556286	NM_001077416	Cluster1
chr16	75536740	75556252	NM_001077418	Cluster1
chr19	57769651	57780616	NM_001077426	Cluster1
chr6	136256862	136289851	NM_001077440	Cluster1
chr6	136256626	136289846	NM_001077441	Cluster1
chr14	21209135	21269479	NM_001077442	Cluster1
chr14	21209135	21269479	NM_001077443	Cluster1
chr12	46183062	46269043	NM_001077484	Cluster1
chr20	58852980	58911196	NM_001077490	Cluster1
chr17	28755979	28842790	NM_001077498	Cluster1
chr17	49838308	49848017	NM_001077503	Cluster1
chr17	49838308	49848017	NM_001077504	Cluster1
chr17	49838308	49848017	NM_001077505	Cluster1
chr17	49838308	49848017	NM_001077506	Cluster1
chr3	9649504	9702393	NM_001077525	Cluster1
chr3	9649504	9702393	NM_001077526	Cluster1
chr8	142657459	142669967	NM_001077527	Cluster1
chr19	9757474	9768738	NM_001077624	Cluster1
chr5	119268758	119399688	NM_001077654	Cluster1
chr7	43875893	43907069	NM_001077663	Cluster1
chr5	139448559	139462743	NM_001077693	Cluster1
chr6	44223594	44234142	NM_001078175	Cluster1
chr6	44223594	44234142	NM_001078177	Cluster1
chr2	97713567	97739860	NM_001079	Cluster1
chr16	10766674	10818794	NM_001079512	Cluster1
chr16	4847480	4882401	NM_001079514	Cluster1
chr1	235367426	235452443	NM_001079515	Cluster1
chr10	50739935	50759252	NM_001079516	Cluster1
chr17	40019103	40054408	NM_001079518	Cluster1
chr14	35044906	35083383	NM_001079519	Cluster1
chr14	58637961	58648320	NM_001079520	Cluster1
chr14	55580206	55684578	NM_001079521	Cluster1
chr14	55580206	55684578	NM_001079522	Cluster1
chr4	56436259	56464578	NM_001079524	Cluster1
chr4	56436259	56464578	NM_001079525	Cluster1
chr2	212999700	213151612	NM_001079526	Cluster1
chr16	16221186	16223471	NM_001079528	Cluster1
chr2	130521221	130528603	NM_001079530	Cluster1
chr15	82543200	82571766	NM_001079533	Cluster1
chr15	82543200	82571766	NM_001079534	Cluster1
chr15	82543200	82571766	NM_001079535	Cluster1
chr11	3638505	3642316	NM_001079536	Cluster1
chr14	39147813	39170333	NM_001079537	Cluster1
chr22	28794559	28800572	NM_001079539	Cluster1
chr11	62712629	62727457	NM_001079559	Cluster1
chr7	4129684	4268999	NM_001079653	Cluster1
chr14	36516398	36520232	NM_001079668	Cluster1
chr13	100603625	100674795	NM_001079669	Cluster1
chr13	49308649	49444064	NM_001079670	Cluster1
chr13	48975911	49209779	NM_001079673	Cluster1
chr17	43527845	43546340	NM_001079675	Cluster1
chr5	176346060	176361807	NM_001079684	Cluster1
chr5	176346060	176361807	NM_001079685	Cluster1
chr13	32400722	32428130	NM_001079691	Cluster1
chr11	60396458	60417755	NM_001079692	Cluster1
chr9	105558130	105641118	NM_001079802	Cluster1
chr17	80101580	80119881	NM_001079803	Cluster1
chr17	80101580	80119881	NM_001079804	Cluster1
chr11	61203514	61213098	NM_001079807	Cluster1
chr11	61222348	61231693	NM_001079808	Cluster1
chr3	149981675	149983366	NM_001079809	Cluster1
chr2	166888486	167259751	NM_001079810	Cluster1
[truncated: 96,208 more rows]

## Sheet: Cluster 1 iPSC
Category	Term	Count	%	P-Value	Benjamini
GOTERM_BP_FAT	cellular localization	1313	14.9	5.4e-25	6.6e-21
GOTERM_BP_FAT	intracellular transport	854	9.7	1.6e-21	9.8e-18
GOTERM_BP_FAT	establishment of localization in cell	1044	11.8	4.3e-21	1.8e-17
GOTERM_BP_FAT	macromolecule localization	1406	16	3.2e-19	9.8e-16
GOTERM_BP_FAT	protein localization	1235	14	1.1e-18	2.6e-15
GOTERM_BP_FAT	mRNA processing	289	3.3	4.4e-17	9e-14
GOTERM_BP_FAT	mitotic cell cycle process	496	5.6	2.2e-16	3.9e-13
GOTERM_BP_FAT	establishment of protein localization	1028	11.7	3.1e-16	5.1e-13
GOTERM_BP_FAT	mitotic cell cycle	532	6	7.2e-16	9.1e-13
GOTERM_BP_FAT	macromolecular complex subunit organization	1223	13.9	2.4e-15	2.9e-12
GOTERM_BP_FAT	gene expression	2480	28.1	7.1e-15	7.3e-12
GOTERM_BP_FAT	single-organism organelle organization	831	9.4	6.7e-15	7.4e-12
GOTERM_BP_FAT	RNA processing	498	5.7	1.7e-14	1.6e-11
GOTERM_BP_FAT	regulation of organelle organization	611	6.9	5.3e-14	4.7e-11
GOTERM_BP_FAT	RNA splicing	244	2.8	6.1e-14	5e-11
GOTERM_BP_FAT	endomembrane system organization	324	3.7	7.4e-14	5.7e-11
GOTERM_BP_FAT	regulation of cellular component organization	1150	13.1	8.3e-14	6e-11
GOTERM_BP_FAT	RNA splicing, via transesterification reactions	193	2.2	1e-13	6.8e-11
GOTERM_BP_FAT	protein transport	938	10.6	1.2e-13	7.5e-11
GOTERM_BP_FAT	cellular macromolecule localization	824	9.4	1.3e-13	8.2e-11
GOTERM_BP_FAT	cellular protein localization	816	9.3	2.9e-13	1.7e-10
GOTERM_BP_FAT	Golgi vesicle transport	200	2.3	3.3e-13	1.8e-10
GOTERM_BP_FAT	mRNA splicing, via spliceosome	189	2.1	5.2e-13	2.8e-10
GOTERM_BP_FAT	RNA splicing, via transesterification reactions with bulged adenosine as nucleophile	189	2.1	5.2e-13	2.8e-10
GOTERM_BP_FAT	posttranscriptional regulation of gene expression	277	3.1	7.7e-13	3.9e-10
GOTERM_BP_FAT	cell cycle	846	9.6	9.6e-13	4.7e-10
GOTERM_BP_FAT	cellular component biogenesis	1404	15.9	3.2e-12	1.5e-09
GOTERM_BP_FAT	mRNA metabolic process	373	4.2	3.7e-12	1.7e-09
GOTERM_BP_FAT	regulation of translation	209	2.4	5.1e-12	2.1e-09
GOTERM_BP_FAT	RNA metabolic process	2167	24.6	5e-12	2.2e-09
GOTERM_BP_FAT	cell cycle process	695	7.9	8.3e-12	3.4e-09
GOTERM_BP_FAT	vesicle-mediated transport	758	8.6	9.4e-12	3.7e-09
GOTERM_BP_FAT	regulation of cellular amide metabolic process	222	2.5	3.8e-11	1.5e-08
GOTERM_BP_FAT	protein modification process	1795	20.4	4e-11	1.5e-08
GOTERM_BP_FAT	cellular protein modification process	1795	20.4	4e-11	1.5e-08
GOTERM_BP_FAT	macromolecular complex assembly	851	9.7	7.6e-11	2.7e-08
GOTERM_BP_FAT	cellular component assembly	1260	14.3	9e-11	3.1e-08
GOTERM_BP_FAT	covalent chromatin modification	307	3.5	1.5e-10	5.1e-08
GOTERM_BP_FAT	mitotic cell cycle phase transition	289	3.3	1.9e-10	6.2e-08
GOTERM_BP_FAT	cell cycle phase transition	305	3.5	2e-10	6.5e-08
GOTERM_BP_FAT	cellular macromolecule biosynthetic process	2309	26.2	2.3e-10	7.1e-08
GOTERM_BP_FAT	cellular response to stress	876	9.9	2.6e-10	7.9e-08
GOTERM_BP_FAT	chromosome organization	605	6.9	3.7e-10	1.1e-07
GOTERM_BP_FAT	histone modification	250	2.8	9.1e-10	2.7e-07
GOTERM_BP_FAT	cytoskeleton organization	584	6.6	9.5e-10	2.7e-07
GOTERM_BP_FAT	cellular catabolic process	800	9.1	1.1e-09	3.1e-07
GOTERM_BP_FAT	peptidyl-lysine modification	233	2.6	1.4e-09	3.8e-07
GOTERM_BP_FAT	protein modification by small protein conjugation	463	5.3	1.5e-09	4.1e-07
GOTERM_BP_FAT	DNA metabolic process	513	5.8	1.9e-09	4.9e-07
GOTERM_BP_FAT	regulation of chromosome organization	172	2	3.8e-09	9.6e-07
GOTERM_BP_FAT	intracellular protein transport	522	5.9	5.2e-09	1.3e-06
GOTERM_BP_FAT	RNA localization	132	1.5	5.5e-09	1.3e-06
GOTERM_BP_FAT	protein modification by small protein conjugation or removal	527	6	6.5e-09	1.6e-06
GOTERM_BP_FAT	mitotic nuclear division	241	2.7	1.3e-08	3.1e-06
GOTERM_BP_FAT	retrograde vesicle-mediated transport, Golgi to ER	61	0.7	1.5e-08	3.4e-06
GOTERM_BP_FAT	peptidyl-amino acid modification	594	6.7	2.3e-08	5.2e-06
GOTERM_BP_FAT	protein catabolic process	420	4.8	3.2e-08	7.1e-06
GOTERM_BP_FAT	ER to Golgi vesicle-mediated transport	112	1.3	3.6e-08	7.9e-06
GOTERM_BP_FAT	macromolecule catabolic process	600	6.8	3.7e-08	7.9e-06
GOTERM_BP_FAT	actin cytoskeleton organization	297	3.4	5.6e-08	1.2e-05
GOTERM_BP_FAT	regulation of nitrogen compound metabolic process	2018	22.9	5.8e-08	1.2e-05
GOTERM_BP_FAT	autophagy	232	2.6	5.7e-08	1.2e-05
GOTERM_BP_FAT	cellular response to DNA damage stimulus	416	4.7	7.5e-08	1.5e-05
GOTERM_BP_FAT	regulation of gene expression	1991	22.6	7.4e-08	1.5e-05
GOTERM_BP_FAT	cell division	306	3.5	1.1e-07	2.1e-05
GOTERM_BP_FAT	nucleobase-containing compound transport	128	1.5	1.3e-07	2.4e-05
GOTERM_BP_FAT	regulation of protein metabolic process	1183	13.4	1.8e-07	3.3e-05
GOTERM_BP_FAT	establishment of RNA localization	111	1.3	1.9e-07	3.6e-05
GOTERM_BP_FAT	modification-dependent macromolecule catabolic process	313	3.6	2.2e-07	4e-05
GOTERM_BP_FAT	actin filament-based process	350	4	2.4e-07	4.2e-05
GOTERM_BP_FAT	modification-dependent protein catabolic process	309	3.5	2.4e-07	4.2e-05
GOTERM_BP_FAT	cellular protein catabolic process	358	4.1	2.3e-07	4.2e-05
GOTERM_BP_FAT	proteasomal protein catabolic process	222	2.5	2.5e-07	4.2e-05
GOTERM_BP_FAT	ribonucleoprotein complex biogenesis	259	2.9	2.5e-07	4.2e-05
GOTERM_BP_FAT	ribonucleoprotein complex subunit organization	133	1.5	2.8e-07	4.6e-05
GOTERM_BP_FAT	RNA transport	109	1.2	2.8e-07	4.6e-05
GOTERM_BP_FAT	nucleic acid transport	109	1.2	2.8e-07	4.6e-05
GOTERM_BP_FAT	ribonucleoprotein complex assembly	127	1.4	3.8e-07	6.2e-05
GOTERM_BP_FAT	ubiquitin-dependent protein catabolic process	304	3.5	4.1e-07	6.6e-05
GOTERM_BP_FAT	phosphate-containing compound metabolic process	1431	16.2	4.2e-07	6.7e-05
GOTERM_BP_FAT	protein complex assembly	703	8	4.2e-07	6.7e-05
GOTERM_BP_FAT	protein complex biogenesis	703	8	4.8e-07	7.4e-05
GOTERM_BP_FAT	phosphorus metabolic process	1433	16.3	4.8e-07	7.5e-05
GOTERM_BP_FAT	regulation of cellular macromolecule biosynthetic process	1827	20.7	5.2e-07	7.8e-05
GOTERM_BP_FAT	protein complex subunit organization	805	9.1	5.4e-07	8.1e-05
GOTERM_BP_FAT	vacuole organization	127	1.4	7.7e-07	0.00011
GOTERM_BP_FAT	establishment of protein localization to plasma membrane	90	1	8.2e-07	0.00012
GOTERM_BP_FAT	ribonucleoprotein complex localization	81	0.9	8.5e-07	0.00012
GOTERM_BP_FAT	single-organism cellular localization	545	6.2	8.4e-07	0.00012
GOTERM_BP_FAT	proteasome-mediated ubiquitin-dependent protein catabolic process	206	2.3	8.9e-07	0.00013
GOTERM_BP_FAT	vacuolar transport	164	1.9	9.4e-07	0.00013
GOTERM_BP_FAT	regulation of autophagy	154	1.7	1e-06	0.00014
GOTERM_BP_FAT	protein acylation	130	1.5	1.1e-06	0.00015
GOTERM_BP_FAT	proteolysis involved in cellular protein catabolic process	339	3.8	1.2e-06	0.00016
GOTERM_BP_FAT	cellular macromolecule catabolic process	486	5.5	1.4e-06	0.00018
GOTERM_BP_FAT	DNA repair	279	3.2	1.4e-06	0.00018
GOTERM_BP_FAT	regulation of cellular protein metabolic process	1100	12.5	1.5e-06	0.0002
GOTERM_BP_FAT	histone deacetylation	57	0.6	1.9e-06	0.00024
GOTERM_BP_FAT	positive regulation of organelle organization	311	3.5	2e-06	0.00025
GOTERM_BP_FAT	nuclear export	111	1.3	2e-06	0.00025
GOTERM_BP_FAT	mRNA transport	91	1	2e-06	0.00025
GOTERM_BP_FAT	protein localization to plasma membrane	122	1.4	2.1e-06	0.00026
GOTERM_BP_FAT	protein sumoylation	84	1	2.4e-06	0.0003
GOTERM_BP_FAT	cytosolic transport	89	1	2.9e-06	0.00035
GOTERM_BP_FAT	sister chromatid segregation	130	1.5	2.9e-06	0.00035
GOTERM_BP_FAT	negative regulation of translation	91	1	3e-06	0.00036
GOTERM_BP_FAT	regulation of macromolecule biosynthetic process	1867	21.2	3.1e-06	0.00037
GOTERM_BP_FAT	protein deacetylation	63	0.7	3.3e-06	0.00038
GOTERM_BP_FAT	regulation of cellular localization	418	4.7	3.5e-06	0.0004
GOTERM_BP_FAT	macroautophagy	119	1.4	4.1e-06	0.00047
GOTERM_BP_FAT	macromolecule deacylation	66	0.7	4.1e-06	0.00047
GOTERM_BP_FAT	RNA export from nucleus	78	0.9	4.7e-06	0.00053
GOTERM_BP_FAT	nuclear transport	249	2.8	5.3e-06	0.00059
GOTERM_BP_FAT	protein localization to cell periphery	130	1.5	5.5e-06	0.0006
GOTERM_BP_FAT	nucleocytoplasmic transport	245	2.8	5.8e-06	0.00063
GOTERM_BP_FAT	protein ubiquitination	387	4.4	5.8e-06	0.00063
GOTERM_BP_FAT	protein deacylation	65	0.7	6.4e-06	0.00068
GOTERM_BP_FAT	regulation of transport	849	9.6	7.4e-06	0.00078
GOTERM_BP_FAT	microtubule-based process	316	3.6	7.5e-06	0.00079
GOTERM_BP_FAT	endosomal transport	141	1.6	8.9e-06	0.00093
GOTERM_BP_FAT	cellular amide metabolic process	488	5.5	9.2e-06	0.00095
GOTERM_BP_FAT	regulation of mitotic cell cycle phase transition	171	1.9	9.5e-06	0.00098
GOTERM_BP_FAT	internal peptidyl-lysine acetylation	91	1	9.8e-06	0.001
GOTERM_BP_FAT	nuclear envelope organization	57	0.6	1e-05	0.001
GOTERM_BP_FAT	internal protein amino acid acetylation	94	1.1	1e-05	0.001
GOTERM_BP_FAT	regulation of chromatin organization	96	1.1	1e-05	0.001
GOTERM_BP_FAT	spliceosomal complex assembly	41	0.5	1e-05	0.001
GOTERM_BP_FAT	regulation of vesicle-mediated transport	236	2.7	1.1e-05	0.0011
GOTERM_BP_FAT	mRNA export from nucleus	67	0.8	1.1e-05	0.0011
GOTERM_BP_FAT	mRNA-containing ribonucleoprotein complex export from nucleus	67	0.8	1.1e-05	0.0011
GOTERM_BP_FAT	nucleoside monophosphate metabolic process	170	1.9	1.2e-05	0.0012
GOTERM_BP_FAT	chromosome segregation	181	2.1	1.3e-05	0.0012
GOTERM_BP_FAT	histone acetylation	88	1	1.4e-05	0.0013
GOTERM_BP_FAT	positive regulation of cellular component organization	572	6.5	1.4e-05	0.0013
GOTERM_BP_FAT	negative regulation of cellular amide metabolic process	93	1.1	1.5e-05	0.0014
GOTERM_BP_FAT	ribonucleoprotein complex export from nucleus	74	0.8	1.5e-05	0.0014
GOTERM_BP_FAT	regulation of cellular component biogenesis	401	4.6	1.5e-05	0.0014
GOTERM_BP_FAT	cell cycle G2/M phase transition	114	1.3	1.5e-05	0.0014
GOTERM_BP_FAT	peptidyl-lysine acetylation	97	1.1	1.5e-05	0.0014
GOTERM_BP_FAT	G2/M transition of mitotic cell cycle	107	1.2	1.5e-05	0.0014
GOTERM_BP_FAT	regulation of cellular protein localization	288	3.3	1.6e-05	0.0014
GOTERM_BP_FAT	microtubule cytoskeleton organization	225	2.6	1.7e-05	0.0015
GOTERM_BP_FAT	membrane disassembly	36	0.4	1.8e-05	0.0015
GOTERM_BP_FAT	nuclear envelope disassembly	36	0.4	1.8e-05	0.0015
GOTERM_BP_FAT	cellular macromolecular complex assembly	490	5.6	1.9e-05	0.0017
GOTERM_BP_FAT	negative regulation of chromosome organization	69	0.8	2e-05	0.0017
GOTERM_BP_FAT	purine nucleoside monophosphate metabolic process	157	1.8	2e-05	0.0017
GOTERM_BP_FAT	nuclear division	297	3.4	2.1e-05	0.0018
GOTERM_BP_FAT	regulation of cell morphogenesis	290	3.3	2.1e-05	0.0018
GOTERM_BP_FAT	spliceosomal snRNP assembly	30	0.3	2.2e-05	0.0019
GOTERM_BP_FAT	protein localization to organelle	443	5	2.4e-05	0.002
GOTERM_BP_FAT	purine ribonucleoside monophosphate metabolic process	156	1.8	2.6e-05	0.0022
GOTERM_BP_FAT	single-organism membrane organization	426	4.8	2.8e-05	0.0023
GOTERM_BP_FAT	protein acetylation	109	1.2	2.9e-05	0.0023
GOTERM_BP_FAT	heterocycle biosynthetic process	1985	22.5	2.9e-05	0.0024
GOTERM_BP_FAT	intracellular signal transduction	1222	13.9	2.9e-05	0.0024
GOTERM_BP_FAT	establishment of organelle localization	220	2.5	2.9e-05	0.0024
GOTERM_BP_FAT	organelle localization	252	2.9	3.3e-05	0.0027
GOTERM_BP_FAT	intra-Golgi vesicle-mediated transport	36	0.4	3.6e-05	0.0029
GOTERM_BP_FAT	regulation of histone modification	81	0.9	3.8e-05	0.003
GOTERM_BP_FAT	nucleus organization	86	1	4e-05	0.0032
GOTERM_BP_FAT	nucleic acid-templated transcription	1706	19.4	4.1e-05	0.0032
GOTERM_BP_FAT	negative regulation of cellular component organization	314	3.6	4.1e-05	0.0032
GOTERM_BP_FAT	regulation of cell projection organization	290	3.3	4.1e-05	0.0032
GOTERM_BP_FAT	plasma membrane organization	151	1.7	4.7e-05	0.0036
GOTERM_BP_FAT	aromatic compound biosynthetic process	1987	22.6	4.8e-05	0.0036
GOTERM_BP_FAT	negative regulation of organelle organization	168	1.9	5.3e-05	0.004
GOTERM_BP_FAT	organophosphate metabolic process	533	6	5.6e-05	0.0042
GOTERM_BP_FAT	regulation of organelle assembly	94	1.1	5.7e-05	0.0043
GOTERM_BP_FAT	activation of GTPase activity	52	0.6	5.7e-05	0.0043
GOTERM_BP_FAT	organelle fission	312	3.5	5.9e-05	0.0044
GOTERM_BP_FAT	ribonucleoside monophosphate metabolic process	160	1.8	6.3e-05	0.0046
GOTERM_BP_FAT	membrane organization	496	5.6	6.4e-05	0.0046
GOTERM_BP_FAT	mRNA 3'-end processing	56	0.6	7e-05	0.0051
GOTERM_BP_FAT	regulation of molecular function	1307	14.8	7.4e-05	0.0053
GOTERM_BP_FAT	nucleobase-containing compound biosynthetic process	1955	22.2	7.6e-05	0.0054
GOTERM_BP_FAT	mitochondrial transport	150	1.7	7.7e-05	0.0055
GOTERM_BP_FAT	positive regulation of catalytic activity	733	8.3	7.8e-05	0.0055
GOTERM_BP_FAT	regulation of cell cycle phase transition	178	2	8.1e-05	0.0057
GOTERM_BP_FAT	regulation of protein catabolic process	194	2.2	8.2e-05	0.0057
GOTERM_BP_FAT	regulation of cellular response to heat	50	0.6	8.3e-05	0.0058
GOTERM_BP_FAT	ribonucleoside metabolic process	201	2.3	8.4e-05	0.0058
GOTERM_BP_FAT	amide biosynthetic process	363	4.1	8.6e-05	0.0059
GOTERM_BP_FAT	cellular protein complex assembly	289	3.3	9.4e-05	0.0064
GOTERM_BP_FAT	glycosyl compound metabolic process	224	2.5	9.9e-05	0.0067
GOTERM_BP_FAT	transcription, DNA-templated	1628	18.5	0.0001	0.0068
GOTERM_BP_FAT	regulation of signaling	1395	15.8	0.00011	0.0071
GOTERM_BP_FAT	phosphorylation	1027	11.7	0.00011	0.0071
GOTERM_BP_FAT	regulation of cell communication	1373	15.6	0.00011	0.0071
GOTERM_BP_FAT	protein localization to nucleus	190	2.2	0.00011	0.0073
GOTERM_BP_FAT	phospholipid metabolic process	204	2.3	0.00011	0.0075
GOTERM_BP_FAT	positive regulation of cell projection organization	162	1.8	0.00012	0.0076
GOTERM_BP_FAT	ncRNA metabolic process	286	3.2	0.00012	0.0077
GOTERM_BP_FAT	Golgi organization	59	0.7	0.00012	0.0079
GOTERM_BP_FAT	regulation of nucleobase-containing compound metabolic process	1842	20.9	0.00013	0.0081
GOTERM_BP_FAT	ncRNA transcription	61	0.7	0.00013	0.0082
GOTERM_BP_FAT	ribonucleoside triphosphate metabolic process	147	1.7	0.00013	0.0083
GOTERM_BP_FAT	nucleoside metabolic process	213	2.4	0.00013	0.0083
GOTERM_BP_FAT	regulation of signal transduction	1244	14.1	0.00014	0.0087
GOTERM_BP_FAT	purine ribonucleoside triphosphate metabolic process	144	1.6	0.00014	0.0087
GOTERM_BP_FAT	purine ribonucleoside metabolic process	186	2.1	0.00015	0.0093
GOTERM_BP_FAT	mitotic nuclear envelope disassembly	32	0.4	0.00015	0.0095
GOTERM_BP_FAT	regulation of macroautophagy	74	0.8	0.00015	0.0095
GOTERM_BP_FAT	purine nucleoside triphosphate metabolic process	147	1.7	0.00016	0.01
GOTERM_BP_FAT	mitochondrion organization	323	3.7	0.00017	0.01
GOTERM_BP_FAT	protein ubiquitination involved in ubiquitin-dependent protein catabolic process	122	1.4	0.00017	0.01
GOTERM_BP_FAT	purine nucleoside metabolic process	187	2.1	0.00018	0.011
GOTERM_BP_FAT	ATP metabolic process	132	1.5	0.00018	0.011
GOTERM_BP_FAT	nuclear chromosome segregation	153	1.7	0.00018	0.011
GOTERM_BP_FAT	positive regulation of molecular function	853	9.7	0.00018	0.011
GOTERM_BP_FAT	regulation of mitotic cell cycle	248	2.8	0.0002	0.012
GOTERM_BP_FAT	cellular component disassembly	253	2.9	0.00021	0.012
GOTERM_BP_FAT	RNA 3'-end processing	69	0.8	0.00021	0.012
GOTERM_BP_FAT	protein targeting	344	3.9	0.00021	0.012
GOTERM_BP_FAT	nucleotide-excision repair	70	0.8	0.00021	0.012
GOTERM_BP_FAT	cell cycle G1/S phase transition	132	1.5	0.00023	0.013
GOTERM_BP_FAT	regulation of cellular response to stress	289	3.3	0.00023	0.013
GOTERM_BP_FAT	RNA biosynthetic process	1752	19.9	0.00023	0.013
GOTERM_BP_FAT	positive regulation of GTPase activity	313	3.6	0.00025	0.014
GOTERM_BP_FAT	nucleoside triphosphate metabolic process	157	1.8	0.00025	0.014
GOTERM_BP_FAT	regulation of cell cycle process	295	3.3	0.00026	0.015
GOTERM_BP_FAT	regulation of DNA metabolic process	191	2.2	0.00028	0.016
GOTERM_BP_FAT	cofactor metabolic process	198	2.2	0.00028	0.016
GOTERM_BP_FAT	regulation of mitophagy	32	0.4	0.00029	0.016
GOTERM_BP_FAT	sister chromatid cohesion	75	0.9	0.0003	0.017
GOTERM_BP_FAT	organonitrogen compound catabolic process	187	2.1	0.00031	0.017
GOTERM_BP_FAT	regulation of mitochondrion organization	124	1.4	0.00034	0.018
GOTERM_BP_FAT	translation	315	3.6	0.00035	0.019
GOTERM_BP_FAT	positive regulation of chromosome organization	85	1	0.00039	0.021
GOTERM_BP_FAT	regulation of mRNA metabolic process	77	0.9	0.00041	0.022
GOTERM_BP_FAT	regulation of catalytic activity	1075	12.2	0.00043	0.023
GOTERM_BP_FAT	negative regulation of protein metabolic process	498	5.7	0.00045	0.024
GOTERM_BP_FAT	microtubule-based movement	122	1.4	0.00044	0.024
GOTERM_BP_FAT	peptide biosynthetic process	326	3.7	0.00045	0.024
GOTERM_BP_FAT	organic acid catabolic process	120	1.4	0.00046	0.024
GOTERM_BP_FAT	regulation of cell projection assembly	92	1	0.00047	0.025
GOTERM_BP_FAT	positive regulation of macroautophagy	31	0.4	0.00049	0.025
GOTERM_BP_FAT	nitrogen compound transport	352	4	0.00048	0.025
GOTERM_BP_FAT	negative regulation of cellular protein metabolic process	472	5.4	0.00051	0.026
GOTERM_BP_FAT	filopodium assembly	32	0.4	0.00054	0.027
GOTERM_BP_FAT	mitotic sister chromatid segregation	81	0.9	0.00054	0.028
GOTERM_BP_FAT	response to endoplasmic reticulum stress	142	1.6	0.00054	0.028
GOTERM_BP_FAT	posttranscriptional gene silencing by RNA	40	0.5	0.00056	0.028
GOTERM_BP_FAT	histone H4 acetylation	40	0.5	0.00056	0.028
GOTERM_BP_FAT	posttranscriptional gene silencing	40	0.5	0.00056	0.028
GOTERM_BP_FAT	NADH metabolic process	27	0.3	0.00056	0.028
GOTERM_BP_FAT	regulation of RNA metabolic process	1683	19.1	0.0006	0.03
GOTERM_BP_FAT	regulation of protein complex assembly	194	2.2	0.00062	0.031
GOTERM_BP_FAT	endosome organization	43	0.5	0.00063	0.032
GOTERM_BP_FAT	mRNA polyadenylation	28	0.3	0.00064	0.032
GOTERM_BP_FAT	tRNA-containing ribonucleoprotein complex export from nucleus	24	0.3	0.00071	0.035
GOTERM_BP_FAT	tRNA export from nucleus	24	0.3	0.00071	0.035
GOTERM_BP_FAT	negative regulation of protein modification process	284	3.2	0.0007	0.035
GOTERM_BP_FAT	small molecule catabolic process	175	2	0.00072	0.035
GOTERM_BP_FAT	regulation of GTPase activity	335	3.8	0.00075	0.037
GOTERM_BP_FAT	positive regulation of histone modification	50	0.6	0.00076	0.037
GOTERM_BP_FAT	positive regulation of cellular protein localization	185	2.1	0.00078	0.038
GOTERM_BP_FAT	peptide metabolic process	392	4.4	0.00079	0.038
GOTERM_BP_FAT	regulation of catabolic process	252	2.9	0.00083	0.039
GOTERM_BP_FAT	tRNA transport	25	0.3	0.00082	0.039
GOTERM_BP_FAT	DNA-templated transcription, termination	61	0.7	0.00083	0.039
GOTERM_BP_FAT	insulin receptor signaling pathway	66	0.7	0.00082	0.039
GOTERM_BP_FAT	cellular amino acid metabolic process	132	1.5	0.00084	0.04
GOTERM_BP_FAT	cytoplasmic translational initiation	15	0.2	0.00091	0.043
GOTERM_BP_FAT	carbohydrate metabolic process	373	4.2	0.001	0.048
GOTERM_BP_FAT	regulation of defense response to virus by virus	22	0.2	0.001	0.048

## Sheet: Cluster 2_IPSC
Category	Term	Count	%	P-Value	Benjamini
GOTERM_BP_FAT	cell projection morphogenesis	424	4.2	3.8e-15	2.3e-11
GOTERM_BP_FAT	cell part morphogenesis	431	4.3	1.3e-14	3.9e-11
GOTERM_BP_FAT	cell projection organization	649	6.5	9.8e-15	4e-11
GOTERM_BP_FAT	cellular component morphogenesis	660	6.6	3.6e-15	4.5e-11
GOTERM_BP_FAT	cell morphogenesis	620	6.2	2.4e-14	5.8e-11
GOTERM_BP_FAT	anatomical structure formation involved in morphogenesis	570	5.7	2.7e-12	5.5e-09
GOTERM_BP_FAT	nervous system development	1004	10	2.2e-11	3.9e-08
GOTERM_BP_FAT	cardiovascular system development	473	4.7	3.4e-11	5.2e-08
GOTERM_BP_FAT	circulatory system development	473	4.7	3.4e-11	5.2e-08
GOTERM_BP_FAT	cell adhesion	799	8	8.5e-11	1.2e-07
GOTERM_BP_FAT	biological adhesion	801	8	1e-10	1.2e-07
GOTERM_BP_FAT	movement of cell or subcellular component	838	8.4	1.7e-10	1.9e-07
GOTERM_BP_FAT	neuron projection morphogenesis	288	2.9	2e-10	2.1e-07
GOTERM_BP_FAT	cell development	910	9.1	2.9e-10	2.7e-07
GOTERM_BP_FAT	neuron development	473	4.7	1.5e-09	1.3e-06
GOTERM_BP_FAT	neuron projection development	407	4.1	2e-09	1.6e-06
GOTERM_BP_FAT	cell morphogenesis involved in neuron differentiation	262	2.6	2.4e-09	1.8e-06
GOTERM_BP_FAT	transmembrane transport	627	6.3	2.5e-09	1.8e-06
GOTERM_BP_FAT	generation of neurons	639	6.4	7.1e-09	4.9e-06
GOTERM_BP_FAT	vasculature development	311	3.1	9.7e-09	6.3e-06
GOTERM_BP_FAT	locomotion	711	7.1	1.4e-08	8.2e-06
GOTERM_BP_FAT	blood vessel development	295	2.9	1.4e-08	8.3e-06
GOTERM_BP_FAT	regulation of signaling	1356	13.5	1.7e-08	9.5e-06
GOTERM_BP_FAT	regulation of cell communication	1335	13.3	1.9e-08	1e-05
GOTERM_BP_FAT	cellular component assembly involved in morphogenesis	164	1.6	2.7e-08	1.4e-05
GOTERM_BP_FAT	neuron differentiation	578	5.8	3.4e-08	1.7e-05
GOTERM_BP_FAT	neurogenesis	672	6.7	4.2e-08	2e-05
GOTERM_BP_FAT	axon development	233	2.3	5.1e-08	2.3e-05
GOTERM_BP_FAT	ion transport	676	6.8	5.3e-08	2.3e-05
GOTERM_BP_FAT	axon guidance	129	1.3	5.9e-08	2.5e-05
GOTERM_BP_FAT	axonogenesis	218	2.2	6.1e-08	2.5e-05
GOTERM_BP_FAT	neuron projection guidance	129	1.3	8.3e-08	3.3e-05
GOTERM_BP_FAT	regulation of cellular component movement	391	3.9	9.6e-08	3.7e-05
GOTERM_BP_FAT	blood vessel morphogenesis	252	2.5	1.3e-07	4.9e-05
GOTERM_BP_FAT	regulation of locomotion	375	3.7	1.4e-07	5.1e-05
GOTERM_BP_FAT	regulation of signal transduction	1203	12	2.3e-07	8.1e-05
GOTERM_BP_FAT	cell morphogenesis involved in differentiation	366	3.7	3.6e-07	0.00012
GOTERM_BP_FAT	regulation of cell motility	358	3.6	4.5e-07	0.00015
GOTERM_BP_FAT	anion transmembrane transport	113	1.1	5.3e-07	0.00017
GOTERM_BP_FAT	regulation of cell migration	335	3.3	5.7e-07	0.00018
GOTERM_BP_FAT	ion transmembrane transport	456	4.6	6.1e-07	0.00019
GOTERM_BP_FAT	lipid metabolic process	613	6.1	6.6e-07	0.0002
GOTERM_BP_FAT	cell projection assembly	216	2.2	7.3e-07	0.00021
GOTERM_BP_FAT	angiogenesis	212	2.1	1.4e-06	0.00039
GOTERM_BP_FAT	positive regulation of multicellular organismal process	653	6.5	1.4e-06	0.0004
GOTERM_BP_FAT	localization of cell	610	6.1	1.6e-06	0.00042
GOTERM_BP_FAT	cell motility	610	6.1	1.6e-06	0.00042
GOTERM_BP_FAT	heart development	255	2.5	2.1e-06	0.00055
GOTERM_BP_FAT	regulation of cell adhesion	313	3.1	2.3e-06	0.00059
GOTERM_BP_FAT	regulation of cell differentiation	699	7	2.3e-06	0.0006
GOTERM_BP_FAT	dendrite development	108	1.1	2.4e-06	0.0006
GOTERM_BP_FAT	regulation of anatomical structure morphogenesis	489	4.9	2.8e-06	0.0007
GOTERM_BP_FAT	cell-cell adhesion via plasma-membrane adhesion molecules	126	1.3	3.2e-06	0.00077
GOTERM_BP_FAT	cilium assembly	115	1.1	3.6e-06	0.00085
GOTERM_BP_FAT	intracellular signal transduction	1160	11.6	4.1e-06	0.00095
GOTERM_BP_FAT	regulation of multicellular organismal development	769	7.7	6.6e-06	0.0015
GOTERM_BP_FAT	regulation of GTPase activity	331	3.3	6.9e-06	0.0015
GOTERM_BP_FAT	anion transport	233	2.3	7.2e-06	0.0016
GOTERM_BP_FAT	cell surface receptor signaling pathway	1162	11.6	7.5e-06	0.0016
GOTERM_BP_FAT	single organismal cell-cell adhesion	345	3.4	9e-06	0.0019
GOTERM_BP_FAT	positive regulation of cell differentiation	395	3.9	9.6e-06	0.002
GOTERM_BP_FAT	muscle tissue development	187	1.9	1.1e-05	0.0022
GOTERM_BP_FAT	regulation of molecular function	1239	12.4	1.3e-05	0.0025
GOTERM_BP_FAT	inorganic anion transmembrane transport	69	0.7	1.2e-05	0.0025
GOTERM_BP_FAT	cilium morphogenesis	132	1.3	1.3e-05	0.0026
GOTERM_BP_FAT	positive regulation of developmental process	499	5	1.7e-05	0.0033
GOTERM_BP_FAT	central nervous system development	420	4.2	1.8e-05	0.0034
GOTERM_BP_FAT	cell migration	539	5.4	1.9e-05	0.0035
GOTERM_BP_FAT	alpha-beta T cell differentiation	55	0.5	2e-05	0.0036
GOTERM_BP_FAT	forebrain development	183	1.8	2e-05	0.0036
GOTERM_BP_FAT	single organism cell adhesion	366	3.7	2e-05	0.0036
GOTERM_BP_FAT	T-helper cell differentiation	34	0.3	2.2e-05	0.0038
GOTERM_BP_FAT	homophilic cell adhesion via plasma membrane adhesion molecules	90	0.9	2.2e-05	0.0039
GOTERM_BP_FAT	CD4-positive, alpha-beta T cell differentiation involved in immune response	35	0.3	2.4e-05	0.0041
GOTERM_BP_FAT	regulation of nervous system development	361	3.6	2.4e-05	0.0042
GOTERM_BP_FAT	regulation of catalytic activity	1027	10.3	2.5e-05	0.0042
GOTERM_BP_FAT	inorganic anion transport	85	0.8	2.6e-05	0.0042
GOTERM_BP_FAT	peptidyl-tyrosine phosphorylation	177	1.8	2.6e-05	0.0042
GOTERM_BP_FAT	cellular lipid metabolic process	478	4.8	2.6e-05	0.0042
GOTERM_BP_FAT	alpha-beta T cell activation	68	0.7	2.8e-05	0.0045
GOTERM_BP_FAT	cilium organization	121	1.2	3.6e-05	0.0056
GOTERM_BP_FAT	CD4-positive, alpha-beta T cell differentiation	40	0.4	3.6e-05	0.0056
GOTERM_BP_FAT	peptidyl-tyrosine modification	177	1.8	4e-05	0.0059
GOTERM_BP_FAT	negative regulation of response to stimulus	614	6.1	3.9e-05	0.0059
GOTERM_BP_FAT	positive regulation of cell adhesion	192	1.9	4.2e-05	0.0062
GOTERM_BP_FAT	chloride transmembrane transport	57	0.6	4.9e-05	0.0069
GOTERM_BP_FAT	alpha-beta T cell activation involved in immune response	35	0.3	4.7e-05	0.0069
GOTERM_BP_FAT	alpha-beta T cell differentiation involved in immune response	35	0.3	4.7e-05	0.0069
GOTERM_BP_FAT	renal system development	146	1.5	4.8e-05	0.0069
GOTERM_BP_FAT	dendrite morphogenesis	59	0.6	4.8e-05	0.0069
GOTERM_BP_FAT	striated muscle tissue development	176	1.8	5.1e-05	0.0071
GOTERM_BP_FAT	negative regulation of epithelial cell proliferation	69	0.7	5.9e-05	0.008
GOTERM_BP_FAT	cell-substrate adhesion	156	1.6	5.8e-05	0.008
GOTERM_BP_FAT	muscle cell differentiation	181	1.8	5.9e-05	0.008
GOTERM_BP_FAT	lipid modification	136	1.4	6.2e-05	0.0082
GOTERM_BP_FAT	inorganic ion transmembrane transport	339	3.4	6.5e-05	0.0085
GOTERM_BP_FAT	cardiac muscle tissue development	101	1	6.6e-05	0.0086
GOTERM_BP_FAT	sodium ion transport	107	1.1	6.7e-05	0.0087
GOTERM_BP_FAT	kidney development	138	1.4	7.1e-05	0.009
GOTERM_BP_FAT	regulation of hydrolase activity	598	6	7.2e-05	0.009
GOTERM_BP_FAT	regulation of alpha-beta T cell activation	46	0.5	7.5e-05	0.0093
GOTERM_BP_FAT	eye development	168	1.7	7.5e-05	0.0093
GOTERM_BP_FAT	enzyme linked receptor protein signaling pathway	436	4.4	8.2e-05	0.01
GOTERM_BP_FAT	organic acid metabolic process	416	4.2	8.3e-05	0.01
GOTERM_BP_FAT	regulation of alpha-beta T cell differentiation	35	0.3	8.8e-05	0.011
GOTERM_BP_FAT	cellular glucuronidation	20	0.2	9.5e-05	0.011
GOTERM_BP_FAT	regulation of cell morphogenesis	270	2.7	9.8e-05	0.012
GOTERM_BP_FAT	muscle structure development	279	2.8	0.0001	0.012
GOTERM_BP_FAT	behavior	265	2.6	0.00011	0.012
GOTERM_BP_FAT	neuron migration	73	0.7	0.00011	0.012
GOTERM_BP_FAT	urogenital system development	161	1.6	0.0001	0.012
GOTERM_BP_FAT	chloride transport	60	0.6	0.00011	0.012
GOTERM_BP_FAT	regulation of neurogenesis	319	3.2	0.0001	0.012
GOTERM_BP_FAT	regulation of antigen receptor-mediated signaling pathway	30	0.3	0.00011	0.012
GOTERM_BP_FAT	eye morphogenesis	81	0.8	0.00011	0.012
GOTERM_BP_FAT	male sex differentiation	87	0.9	0.00012	0.013
GOTERM_BP_FAT	regulation of cell projection organization	271	2.7	0.00013	0.013
GOTERM_BP_FAT	regulation of developmental growth	153	1.5	0.00013	0.013
GOTERM_BP_FAT	negative regulation of cell adhesion	115	1.1	0.00013	0.014
GOTERM_BP_FAT	muscle system process	198	2	0.00014	0.014
GOTERM_BP_FAT	regulation of cell development	390	3.9	0.00015	0.016
GOTERM_BP_FAT	ameboidal-type cell migration	160	1.6	0.00016	0.016
GOTERM_BP_FAT	positive regulation of GTPase activity	297	3	0.00016	0.016
GOTERM_BP_FAT	cognition	130	1.3	0.00016	0.016
GOTERM_BP_FAT	male gonad development	76	0.8	0.00018	0.018
GOTERM_BP_FAT	development of primary male sexual characteristics	76	0.8	0.00018	0.018
GOTERM_BP_FAT	cell-matrix adhesion	102	1	0.00018	0.018
GOTERM_BP_FAT	monocarboxylic acid metabolic process	264	2.6	0.0002	0.019
GOTERM_BP_FAT	negative regulation of multicellular organismal process	459	4.6	0.00021	0.021
GOTERM_BP_FAT	regulation of small GTPase mediated signal transduction	150	1.5	0.00022	0.021
GOTERM_BP_FAT	developmental growth	274	2.7	0.00022	0.021
GOTERM_BP_FAT	negative regulation of signal transduction	489	4.9	0.00023	0.022
GOTERM_BP_FAT	neuron projection extension	78	0.8	0.00023	0.022
GOTERM_BP_FAT	regulation of neuron projection development	200	2	0.00024	0.023
GOTERM_BP_FAT	brain development	317	3.2	0.00025	0.023
GOTERM_BP_FAT	regulation of epithelial cell proliferation	150	1.5	0.00026	0.024
GOTERM_BP_FAT	telencephalon development	119	1.2	0.00027	0.025
GOTERM_BP_FAT	interleukin-2 production	38	0.4	0.00029	0.026
GOTERM_BP_FAT	CD4-positive, alpha-beta T cell activation	41	0.4	0.0003	0.027
GOTERM_BP_FAT	bile acid biosynthetic process	21	0.2	0.0003	0.027
GOTERM_BP_FAT	positive regulation of hydrolase activity	415	4.1	0.00033	0.029
GOTERM_BP_FAT	developmental cell growth	99	1	0.00035	0.031
GOTERM_BP_FAT	striated muscle cell differentiation	127	1.3	0.00036	0.031
GOTERM_BP_FAT	cell proliferation	808	8.1	0.00037	0.031
GOTERM_BP_FAT	single-organism behavior	191	1.9	0.00037	0.031
GOTERM_BP_FAT	lipid biosynthetic process	290	2.9	0.00037	0.031
GOTERM_BP_FAT	head development	331	3.3	0.00036	0.031
GOTERM_BP_FAT	positive regulation of molecular function	799	8	0.00038	0.031
GOTERM_BP_FAT	epithelial cell proliferation	170	1.7	0.00036	0.031
GOTERM_BP_FAT	phosphatidylinositol-mediated signaling	97	1	0.00038	0.031
GOTERM_BP_FAT	gamma-aminobutyric acid signaling pathway	18	0.2	0.00038	0.032
GOTERM_BP_FAT	negative regulation of alpha-beta T cell activation	18	0.2	0.00038	0.032
GOTERM_BP_FAT	flavonoid glucuronidation	18	0.2	0.00038	0.032
GOTERM_BP_FAT	regulation of intracellular signal transduction	747	7.5	0.00038	0.032
GOTERM_BP_FAT	negative regulation of signaling	527	5.3	0.00042	0.034
GOTERM_BP_FAT	actin filament-based process	310	3.1	0.00043	0.034
GOTERM_BP_FAT	cellular hormone metabolic process	61	0.6	0.00043	0.034
GOTERM_BP_FAT	negative regulation of cell communication	525	5.2	0.00044	0.035
GOTERM_BP_FAT	epithelium migration	118	1.2	0.00044	0.035
GOTERM_BP_FAT	T cell differentiation involved in immune response	36	0.4	0.00046	0.036
GOTERM_BP_FAT	inositol lipid-mediated signaling	98	1	0.00047	0.036
GOTERM_BP_FAT	metal ion transport	370	3.7	0.00048	0.037
GOTERM_BP_FAT	developmental growth involved in morphogenesis	106	1.1	0.00051	0.039
GOTERM_BP_FAT	pallium development	84	0.8	0.00054	0.041
GOTERM_BP_FAT	regulation of neuron differentiation	261	2.6	0.00059	0.044
GOTERM_BP_FAT	tissue migration	120	1.2	0.00061	0.046
GOTERM_BP_FAT	axon extension	60	0.6	0.00062	0.046
GOTERM_BP_FAT	negative regulation of developmental process	337	3.4	0.00064	0.047
GOTERM_BP_FAT	protein phosphorylation	801	8	0.00065	0.048
GOTERM_BP_FAT	bile acid metabolic process	29	0.3	0.00065	0.048
GOTERM_BP_FAT	positive regulation of catalytic activity	680	6.8	0.00065	0.048
GOTERM_BP_FAT	negative regulation of cell morphogenesis involved in differentiation	66	0.7	0.00067	0.048
GOTERM_BP_FAT	sex differentiation	134	1.3	0.00069	0.049
GOTERM_BP_FAT	gonad development	109	1.1	0.00068	0.049

## Sheet: Cluster 3_IPSC
Category	Term	Count	%	P-Value	Benjamini
GOTERM_BP_FAT	SRP-dependent cotranslational protein targeting to membrane	58	1.4	6.9e-24	3.2e-20
GOTERM_BP_FAT	protein targeting to ER	61	1.5	3.7e-24	3.5e-20
GOTERM_BP_FAT	establishment of protein localization to endoplasmic reticulum	61	1.5	5.5e-23	1.7e-19
GOTERM_BP_FAT	cotranslational protein targeting to membrane	58	1.4	8.5e-22	2e-18
GOTERM_BP_FAT	protein localization to endoplasmic reticulum	65	1.6	3.7e-21	6.9e-18
GOTERM_BP_FAT	nuclear-transcribed mRNA catabolic process, nonsense-mediated decay	59	1.5	8.8e-18	1.4e-14
GOTERM_BP_FAT	protein targeting to membrane	74	1.8	8.1e-16	1e-12
GOTERM_BP_FAT	translational initiation	71	1.8	2.8e-14	3.2e-11
GOTERM_BP_FAT	nuclear-transcribed mRNA catabolic process	72	1.8	1.1e-12	1.1e-09
GOTERM_BP_FAT	translation	162	4	1.8e-12	1.6e-09
GOTERM_BP_FAT	peptide biosynthetic process	166	4.1	3.5e-12	3e-09
GOTERM_BP_FAT	amide biosynthetic process	177	4.4	1.4e-11	1.1e-08
GOTERM_BP_FAT	mRNA catabolic process	73	1.8	1.6e-11	1.2e-08
GOTERM_BP_FAT	viral transcription	63	1.6	4e-11	2.6e-08
GOTERM_BP_FAT	ribosome biogenesis	96	2.4	7.8e-11	4.9e-08
GOTERM_BP_FAT	viral gene expression	64	1.6	2.1e-10	1.2e-07
GOTERM_BP_FAT	rRNA processing	81	2	2.1e-10	1.2e-07
GOTERM_BP_FAT	RNA catabolic process	76	1.9	4e-10	2.1e-07
GOTERM_BP_FAT	multi-organism metabolic process	68	1.7	5.6e-10	2.8e-07
GOTERM_BP_FAT	rRNA metabolic process	81	2	7.9e-10	3.5e-07
GOTERM_BP_FAT	establishment of protein localization to membrane	100	2.5	7.7e-10	3.6e-07
GOTERM_BP_FAT	defense response	308	7.7	9.3e-10	4e-07
GOTERM_BP_FAT	peptide metabolic process	185	4.6	1e-09	4.1e-07
GOTERM_BP_FAT	nucleobase-containing compound catabolic process	102	2.5	1.1e-09	4.1e-07
GOTERM_BP_FAT	single-organism intracellular transport	158	3.9	1.3e-08	5e-06
GOTERM_BP_FAT	heterocycle catabolic process	104	2.6	2.1e-08	7.5e-06
GOTERM_BP_FAT	aromatic compound catabolic process	106	2.6	2.7e-08	8.9e-06
GOTERM_BP_FAT	cellular amide metabolic process	210	5.2	2.6e-08	9.1e-06
GOTERM_BP_FAT	positive regulation of cell proliferation	184	4.6	3.3e-08	9.9e-06
GOTERM_BP_FAT	organic cyclic compound catabolic process	110	2.7	3.1e-08	1e-05
GOTERM_BP_FAT	regulation of cell proliferation	305	7.6	3.3e-08	1e-05
GOTERM_BP_FAT	organonitrogen compound biosynthetic process	275	6.9	3.5e-08	1e-05
GOTERM_BP_FAT	establishment of protein localization to organelle	150	3.7	6e-08	1.7e-05
GOTERM_BP_FAT	viral life cycle	110	2.7	1.1e-07	2.9e-05
GOTERM_BP_FAT	cellular nitrogen compound catabolic process	103	2.6	1e-07	2.9e-05
GOTERM_BP_FAT	ribonucleoprotein complex biogenesis	114	2.8	1.7e-07	4.3e-05
GOTERM_BP_FAT	protein targeting	154	3.8	2.1e-07	5.3e-05
GOTERM_BP_FAT	ncRNA processing	100	2.5	3e-07	7.4e-05
GOTERM_BP_FAT	multi-organism cellular process	201	5	3.1e-07	7.5e-05
GOTERM_BP_FAT	symbiosis, encompassing mutualism through parasitism	204	5.1	5.5e-07	0.00013
GOTERM_BP_FAT	interspecies interaction between organisms	204	5.1	5.5e-07	0.00013
GOTERM_BP_FAT	viral process	198	4.9	6.9e-07	0.00016
GOTERM_BP_FAT	protein localization to membrane	112	2.8	1.4e-06	0.00032
GOTERM_BP_FAT	ribosome assembly	25	0.6	1.7e-06	0.00036
GOTERM_BP_FAT	response to cytokine	167	4.2	2.1e-06	0.00045
GOTERM_BP_FAT	response to biotic stimulus	179	4.5	2.4e-06	0.0005
GOTERM_BP_FAT	RNA biosynthetic process	663	16.5	7.8e-06	0.0016
GOTERM_BP_FAT	response to other organism	168	4.2	1e-05	0.002
GOTERM_BP_FAT	response to external biotic stimulus	168	4.2	1e-05	0.002
GOTERM_BP_FAT	regulation of programmed cell death	265	6.6	1.4e-05	0.0028
GOTERM_BP_FAT	ribosomal large subunit biogenesis	25	0.6	1.6e-05	0.003
GOTERM_BP_FAT	mitochondrial translational elongation	29	0.7	2e-05	0.0035
GOTERM_BP_FAT	cellular macromolecule biosynthetic process	829	20.7	2e-05	0.0036
GOTERM_BP_FAT	cell killing	35	0.9	2e-05	0.0036
GOTERM_BP_FAT	cellular response to cytokine stimulus	145	3.6	2.2e-05	0.0039
GOTERM_BP_FAT	regulation of cell death	279	7	2.5e-05	0.0042
GOTERM_BP_FAT	mitochondrial translational termination	29	0.7	2.5e-05	0.0043
GOTERM_BP_FAT	regulation of apoptotic process	261	6.5	2.6e-05	0.0043
GOTERM_BP_FAT	gene expression	872	21.8	2.5e-05	0.0043
GOTERM_BP_FAT	protein localization to organelle	178	4.4	2.7e-05	0.0044
GOTERM_BP_FAT	negative regulation of cell death	177	4.4	2.9e-05	0.0046
GOTERM_BP_FAT	response to bacterium	116	2.9	3e-05	0.0046
GOTERM_BP_FAT	positive regulation of cellular metabolic process	491	12.3	3e-05	0.0047
GOTERM_BP_FAT	translational termination	31	0.8	3.2e-05	0.0048
GOTERM_BP_FAT	negative regulation of programmed cell death	165	4.1	3.4e-05	0.005
GOTERM_BP_FAT	negative regulation of apoptotic process	163	4.1	3.6e-05	0.0053
GOTERM_BP_FAT	programmed cell death	333	8.3	3.8e-05	0.0055
GOTERM_BP_FAT	ncRNA metabolic process	120	3	4e-05	0.0056
GOTERM_BP_FAT	antigen processing and presentation of exogenous peptide antigen via MHC class I, TAP-independent	8	0.2	4.2e-05	0.0058
GOTERM_BP_FAT	positive regulation of nitrogen compound metabolic process	319	8	4.3e-05	0.0059
GOTERM_BP_FAT	heterocycle biosynthetic process	733	18.3	4.6e-05	0.0062
GOTERM_BP_FAT	cell death	349	8.7	5.2e-05	0.0068
GOTERM_BP_FAT	translational elongation	39	1	5.1e-05	0.0068
GOTERM_BP_FAT	apoptotic process	315	7.9	5.3e-05	0.0069
GOTERM_BP_FAT	aromatic compound biosynthetic process	734	18.3	5.5e-05	0.007
GOTERM_BP_FAT	response to external stimulus	366	9.1	7.4e-05	0.0093
GOTERM_BP_FAT	intracellular protein transport	195	4.9	7.5e-05	0.0093
GOTERM_BP_FAT	cellular response to chemical stimulus	457	11.4	7.8e-05	0.0094
GOTERM_BP_FAT	mitochondrial translation	35	0.9	7.7e-05	0.0094
GOTERM_BP_FAT	inflammatory response	130	3.2	8.2e-05	0.0098
GOTERM_BP_FAT	regulation of gastrulation	16	0.4	8.5e-05	0.0098
GOTERM_BP_FAT	nucleobase-containing compound biosynthetic process	721	18	8.4e-05	0.0099
GOTERM_BP_FAT	regulation of endopeptidase activity	83	2.1	9.6e-05	0.011
GOTERM_BP_FAT	negative regulation of cell differentiation	130	3.2	0.0001	0.011
GOTERM_BP_FAT	immune response	281	7	0.0001	0.011
GOTERM_BP_FAT	positive regulation of endopeptidase activity	39	1	0.00012	0.013
GOTERM_BP_FAT	defense response to bacterium	63	1.6	0.00013	0.014
GOTERM_BP_FAT	cell proliferation	330	8.2	0.00013	0.014
GOTERM_BP_FAT	regulation of cysteine-type endopeptidase activity	55	1.4	0.00014	0.015
GOTERM_BP_FAT	negative regulation of molecular function	206	5.1	0.00016	0.017
GOTERM_BP_FAT	regulation of epidermis development	23	0.6	0.0002	0.021
GOTERM_BP_FAT	positive regulation of macromolecule biosynthetic process	286	7.1	0.0002	0.021
GOTERM_BP_FAT	positive regulation of peptidase activity	41	1	0.00022	0.022
GOTERM_BP_FAT	chemokine-mediated signaling pathway	26	0.6	0.00022	0.022
GOTERM_BP_FAT	response to organic substance	479	12	0.00024	0.023
GOTERM_BP_FAT	mitochondrion organization	130	3.2	0.00025	0.025
GOTERM_BP_FAT	positive regulation of nucleobase-containing compound metabolic process	295	7.4	0.00026	0.025
GOTERM_BP_FAT	positive regulation of metabolic process	514	12.8	0.00029	0.027
GOTERM_BP_FAT	negative regulation of catalytic activity	161	4	0.00028	0.027
GOTERM_BP_FAT	regulation of peptidase activity	85	2.1	0.00031	0.029
GOTERM_BP_FAT	negative regulation of cellular metabolic process	403	10.1	0.00031	0.029
GOTERM_BP_FAT	positive regulation of macromolecule metabolic process	483	12.1	0.00034	0.031
GOTERM_BP_FAT	negative regulation of biosynthetic process	269	6.7	0.00035	0.032
GOTERM_BP_FAT	negative regulation of cellular biosynthetic process	265	6.6	0.00036	0.033
GOTERM_BP_FAT	negative regulation of transport	94	2.3	0.00038	0.034
GOTERM_BP_FAT	transcription from RNA polymerase II promoter	319	8	0.0004	0.035
GOTERM_BP_FAT	positive regulation of biosynthetic process	309	7.7	0.00044	0.039
GOTERM_BP_FAT	innate immune response	159	4	0.00047	0.04
GOTERM_BP_FAT	regulation of binding	67	1.7	0.00047	0.04
GOTERM_BP_FAT	negative regulation of inflammatory response	31	0.8	0.00048	0.04
GOTERM_BP_FAT	cell chemotaxis	58	1.4	0.00048	0.041
GOTERM_BP_FAT	leukocyte mediated cytotoxicity	25	0.6	0.00056	0.047

## Sheet: Cluster 4_IPSC
Category	Term	Count	%	P-Value	Benjamini
GOTERM_BP_FAT	detection of chemical stimulus involved in sensory perception	392	6.2	5.3e-286	3.9e-282
GOTERM_BP_FAT	detection of chemical stimulus involved in sensory perception of smell	367	5.8	2.6e-282	9.6e-279
GOTERM_BP_FAT	sensory perception of smell	372	5.9	2.6e-266	6.3e-263
GOTERM_BP_FAT	detection of chemical stimulus	395	6.2	1.3e-264	2.4e-261
GOTERM_BP_FAT	sensory perception of chemical stimulus	400	6.3	8.2e-263	1.2e-259
GOTERM_BP_FAT	detection of stimulus involved in sensory perception	395	6.2	5.8e-259	7.1e-256
GOTERM_BP_FAT	detection of stimulus	407	6.4	5.8e-206	6.1e-203
GOTERM_BP_FAT	G-protein coupled receptor signaling pathway	553	8.7	3e-199	2.7e-196
GOTERM_BP_FAT	sensory perception	447	7.1	8.8e-170	7.2e-167
GOTERM_BP_FAT	neurological system process	487	7.7	1.5e-140	1.1e-137
GOTERM_BP_FAT	system process	558	8.8	1.7e-96	1.1e-93
GOTERM_BP_FAT	nucleosome assembly	78	1.2	4e-32	2.5e-29
GOTERM_BP_FAT	chromatin assembly	78	1.2	2.2e-28	1.2e-25
GOTERM_BP_FAT	nucleosome organization	80	1.3	1e-27	5.5e-25
GOTERM_BP_FAT	DNA packaging	84	1.3	1e-25	5.1e-23
GOTERM_BP_FAT	chromatin assembly or disassembly	80	1.3	2.9e-25	1.4e-22
GOTERM_BP_FAT	chromatin silencing	57	0.9	1.5e-21	6.5e-19
GOTERM_BP_FAT	protein-DNA complex assembly	84	1.3	3.8e-21	1.6e-18
GOTERM_BP_FAT	negative regulation of gene expression, epigenetic	58	0.9	6.1e-19	2.2e-16
GOTERM_BP_FAT	protein-DNA complex subunit organization	86	1.4	6.1e-19	2.3e-16
GOTERM_BP_FAT	keratinization	33	0.5	4.2e-18	1.5e-15
GOTERM_BP_FAT	peptide cross-linking	34	0.5	4.6e-17	1.5e-14
GOTERM_BP_FAT	DNA conformation change	87	1.4	4.4e-17	1.5e-14
GOTERM_BP_FAT	chromatin silencing at rDNA	27	0.4	1.4e-15	4.4e-13
GOTERM_BP_FAT	DNA replication-dependent nucleosome assembly	24	0.4	4.8e-15	1.4e-12
GOTERM_BP_FAT	DNA replication-dependent nucleosome organization	24	0.4	4.8e-15	1.4e-12
GOTERM_BP_FAT	protein heterotetramerization	26	0.4	2.3e-13	6.6e-11
GOTERM_BP_FAT	detection of chemical stimulus involved in sensory perception of bitter taste	25	0.4	5.5e-13	1.5e-10
GOTERM_BP_FAT	keratinocyte differentiation	45	0.7	1.4e-12	3.7e-10
GOTERM_BP_FAT	defense response to bacterium	73	1.2	9.4e-12	2.4e-09
GOTERM_BP_FAT	sensory perception of bitter taste	25	0.4	1.8e-11	4.3e-09
GOTERM_BP_FAT	positive regulation of peptidyl-serine phosphorylation of STAT protein	17	0.3	1.8e-11	4.3e-09
GOTERM_BP_FAT	detection of chemical stimulus involved in sensory perception of taste	25	0.4	3.4e-11	7.7e-09
GOTERM_BP_FAT	regulation of peptidyl-serine phosphorylation of STAT protein	17	0.3	5.8e-11	1.3e-08
GOTERM_BP_FAT	chemokine-mediated signaling pathway	34	0.5	6.2e-11	1.3e-08
GOTERM_BP_FAT	negative regulation of megakaryocyte differentiation	15	0.2	2.1e-10	4.5e-08
GOTERM_BP_FAT	antibacterial humoral response	26	0.4	5.9e-10	1.2e-07
GOTERM_BP_FAT	innate immune response in mucosa	17	0.3	1.1e-09	2.2e-07
GOTERM_BP_FAT	defense response to other organism	105	1.7	3.4e-09	6.5e-07
GOTERM_BP_FAT	epidermal cell differentiation	51	0.8	3.6e-09	6.7e-07
GOTERM_BP_FAT	natural killer cell activation involved in immune response	18	0.3	4.8e-09	8.8e-07
GOTERM_BP_FAT	serine phosphorylation of STAT protein	17	0.3	5.6e-09	9.8e-07
GOTERM_BP_FAT	antimicrobial humoral response	26	0.4	5.5e-09	9.8e-07
GOTERM_BP_FAT	mucosal immune response	19	0.3	7.3e-09	1.2e-06
GOTERM_BP_FAT	positive regulation of gene expression, epigenetic	30	0.5	1.1e-08	1.8e-06
GOTERM_BP_FAT	defense response to Gram-positive bacterium	32	0.5	1.1e-08	1.8e-06
GOTERM_BP_FAT	organ or tissue specific immune response	19	0.3	2.4e-08	3.8e-06
GOTERM_BP_FAT	regulation of gene expression, epigenetic	64	1	3.4e-08	5.3e-06
GOTERM_BP_FAT	sensory perception of taste	26	0.4	1.1e-07	1.6e-05
GOTERM_BP_FAT	lymphocyte chemotaxis	23	0.4	1.6e-07	2.4e-05
GOTERM_BP_FAT	regulation of megakaryocyte differentiation	16	0.3	2e-07	2.9e-05
GOTERM_BP_FAT	gene silencing	60	0.9	2.5e-07	3.5e-05
GOTERM_BP_FAT	response to bacterium	106	1.7	3e-07	4.2e-05
GOTERM_BP_FAT	chromatin organization	139	2.2	3.5e-07	4.9e-05
GOTERM_BP_FAT	skin development	56	0.9	6.3e-07	8.5e-05
GOTERM_BP_FAT	adenylate cyclase-activating G-protein coupled receptor signaling pathway	30	0.5	6.3e-07	8.6e-05
GOTERM_BP_FAT	protein heterooligomerization	35	0.6	1.1e-06	0.00014
GOTERM_BP_FAT	humoral immune response	57	0.9	1.5e-06	0.00019
GOTERM_BP_FAT	response to other organism	145	2.3	1.5e-06	0.00019
GOTERM_BP_FAT	response to external biotic stimulus	145	2.3	1.5e-06	0.00019
GOTERM_BP_FAT	adenylate cyclase-activating serotonin receptor signaling pathway	10	0.2	2.2e-06	0.00027
GOTERM_BP_FAT	anterior/posterior pattern specification	48	0.8	3.2e-06	0.00039
GOTERM_BP_FAT	regionalization	69	1.1	3.4e-06	0.00041
GOTERM_BP_FAT	lymphocyte migration	26	0.4	3.5e-06	0.00042
GOTERM_BP_FAT	monocyte chemotaxis	22	0.3	3.8e-06	0.00044
GOTERM_BP_FAT	response to biotic stimulus	148	2.3	6.6e-06	0.00075
GOTERM_BP_FAT	positive regulation of leukocyte migration	31	0.5	7.2e-06	0.00082
GOTERM_BP_FAT	neutrophil chemotaxis	26	0.4	9.3e-06	0.001
GOTERM_BP_FAT	oxygen transport	10	0.2	1.2e-05	0.0013
GOTERM_BP_FAT	epidermis development	62	1	1.8e-05	0.0019
GOTERM_BP_FAT	positive regulation of leukocyte chemotaxis	25	0.4	1.9e-05	0.002
GOTERM_BP_FAT	feeding behavior	29	0.5	1.9e-05	0.002
GOTERM_BP_FAT	cellular response to zinc ion	11	0.2	1.9e-05	0.002
GOTERM_BP_FAT	negative regulation of myeloid cell differentiation	27	0.4	2.1e-05	0.0022
GOTERM_BP_FAT	adenylate cyclase-modulating G-protein coupled receptor signaling pathway	40	0.6	2.5e-05	0.0025
GOTERM_BP_FAT	neuron fate commitment	22	0.3	2.5e-05	0.0025
GOTERM_BP_FAT	G-protein coupled receptor signaling pathway, coupled to cyclic nucleotide second messenger	44	0.7	3.3e-05	0.0032
GOTERM_BP_FAT	response to exogenous dsRNA	17	0.3	3.4e-05	0.0033
GOTERM_BP_FAT	negative regulation of hemopoiesis	34	0.5	4.5e-05	0.0043
GOTERM_BP_FAT	protein deubiquitination	34	0.5	5.3e-05	0.0049
GOTERM_BP_FAT	granulocyte chemotaxis	28	0.4	5.2e-05	0.0049
GOTERM_BP_FAT	negative regulation of RNA biosynthetic process	187	3	5.4e-05	0.0049
GOTERM_BP_FAT	negative regulation of transcription, DNA-templated	178	2.8	6e-05	0.0055
GOTERM_BP_FAT	neutrophil migration	26	0.4	7.5e-05	0.0067
GOTERM_BP_FAT	leukocyte chemotaxis	43	0.7	8.1e-05	0.0072
GOTERM_BP_FAT	cytokine-mediated signaling pathway	97	1.5	9.1e-05	0.0079
GOTERM_BP_FAT	negative regulation of nucleic acid-templated transcription	183	2.9	9.8e-05	0.0085
GOTERM_BP_FAT	positive regulation of peptidyl-serine phosphorylation	25	0.4	0.0001	0.0085
GOTERM_BP_FAT	histone exchange	19	0.3	0.00011	0.0095
GOTERM_BP_FAT	cell-cell adhesion via plasma-membrane adhesion molecules	48	0.8	0.00012	0.01
GOTERM_BP_FAT	pattern specification process	79	1.2	0.00014	0.012
GOTERM_BP_FAT	gas transport	10	0.2	0.00014	0.012
GOTERM_BP_FAT	cell fate specification	23	0.4	0.00017	0.014
GOTERM_BP_FAT	megakaryocyte differentiation	16	0.3	0.00018	0.014
GOTERM_BP_FAT	serotonin receptor signaling pathway	12	0.2	0.00021	0.016
GOTERM_BP_FAT	negative regulation of RNA metabolic process	189	3	0.00021	0.017
GOTERM_BP_FAT	regulation of leukocyte chemotaxis	26	0.4	0.00022	0.017
GOTERM_BP_FAT	positive regulation of response to external stimulus	53	0.8	0.00023	0.017
GOTERM_BP_FAT	regulation of myeloid cell differentiation	41	0.6	0.00025	0.019
GOTERM_BP_FAT	cellular response to tumor necrosis factor	49	0.8	0.0003	0.022
GOTERM_BP_FAT	CENP-A containing nucleosome assembly	15	0.2	0.0003	0.022
GOTERM_BP_FAT	CENP-A containing chromatin organization	15	0.2	0.0003	0.022
GOTERM_BP_FAT	granulocyte migration	28	0.4	0.00032	0.024
GOTERM_BP_FAT	protein tetramerization	32	0.5	0.00034	0.024
GOTERM_BP_FAT	innate immune response	133	2.1	0.00036	0.026
GOTERM_BP_FAT	B cell proliferation	23	0.4	0.00036	0.026
GOTERM_BP_FAT	regulation of type I interferon-mediated signaling pathway	14	0.2	0.00038	0.027
GOTERM_BP_FAT	defense response to fungus	14	0.2	0.00038	0.027
GOTERM_BP_FAT	response to zinc ion	17	0.3	0.00039	0.027
GOTERM_BP_FAT	epithelial cell differentiation	95	1.5	0.00041	0.028
GOTERM_BP_FAT	positive regulation of lymphocyte migration	11	0.2	0.00049	0.033
GOTERM_BP_FAT	embryonic skeletal system development	29	0.5	0.00051	0.034
GOTERM_BP_FAT	regulation of cAMP metabolic process	30	0.5	0.00051	0.034
GOTERM_BP_FAT	cell fate commitment	48	0.8	0.00052	0.034
GOTERM_BP_FAT	natural killer cell activation	21	0.3	0.00053	0.034
GOTERM_BP_FAT	response to tumor necrosis factor	51	0.8	0.00053	0.034
GOTERM_BP_FAT	regulation of cyclic nucleotide metabolic process	34	0.5	0.00054	0.035
GOTERM_BP_FAT	protein modification by small protein removal	34	0.5	0.00054	0.035
GOTERM_BP_FAT	cyclic nucleotide biosynthetic process	33	0.5	0.00063	0.04
GOTERM_BP_FAT	cAMP metabolic process	32	0.5	0.00064	0.04
GOTERM_BP_FAT	neuropeptide signaling pathway	25	0.4	0.00065	0.04
GOTERM_BP_FAT	positive regulation of cyclic nucleotide metabolic process	26	0.4	0.00066	0.041
GOTERM_BP_FAT	regulation of leukocyte migration	34	0.5	0.00069	0.042
GOTERM_BP_FAT	regulation of peptidyl-serine phosphorylation	28	0.4	0.00077	0.046
GOTERM_BP_FAT	calcium-independent cell-cell adhesion via plasma membrane cell-adhesion molecules	10	0.2	0.00081	0.048
GOTERM_BP_FAT	negative regulation of nucleobase-containing compound metabolic process	202	3.2	0.00081	0.048
GOTERM_BP_FAT	chromatin remodeling at centromere	15	0.2	0.00083	0.049

## Sheet: Cluster 1_M
Category	Term	Count	%	P-Value	Benjamini
GOTERM_BP_FAT	gene expression	2065	38.6	1.4e-96	1.5e-92
GOTERM_BP_FAT	RNA metabolic process	1833	34.3	2.3e-87	1.2e-83
GOTERM_BP_FAT	cellular macromolecule biosynthetic process	1880	35.2	6.1e-68	2.2e-64
GOTERM_BP_FAT	RNA processing	497	9.3	1.7e-66	4.6e-63
GOTERM_BP_FAT	cell cycle	761	14.2	1.4e-57	2.9e-54
GOTERM_BP_FAT	mitotic cell cycle process	467	8.7	1.8e-55	3.2e-52
GOTERM_BP_FAT	mitotic cell cycle	497	9.3	2.3e-55	3.4e-52
GOTERM_BP_FAT	cell cycle process	640	12	1.7e-54	2.2e-51
GOTERM_BP_FAT	regulation of nitrogen compound metabolic process	1642	30.7	2.7e-54	3.2e-51
GOTERM_BP_FAT	mRNA metabolic process	377	7.1	6.5e-54	6.9e-51
GOTERM_BP_FAT	regulation of gene expression	1618	30.3	8e-53	7.7e-50
GOTERM_BP_FAT	chromosome organization	568	10.6	5.3e-51	4.6e-48
GOTERM_BP_FAT	mRNA processing	287	5.4	1e-50	8.3e-48
GOTERM_BP_FAT	macromolecular complex subunit organization	1009	18.9	1.8e-50	1.3e-47
GOTERM_BP_FAT	intracellular transport	711	13.3	1.8e-49	1.2e-46
GOTERM_BP_FAT	regulation of cellular macromolecule biosynthetic process	1489	27.9	5.5e-48	3.6e-45
GOTERM_BP_FAT	heterocycle biosynthetic process	1618	30.3	7.4e-48	4.6e-45
GOTERM_BP_FAT	nucleobase-containing compound biosynthetic process	1598	29.9	4.9e-47	2.9e-44
GOTERM_BP_FAT	aromatic compound biosynthetic process	1616	30.2	1.9e-46	1.1e-43
GOTERM_BP_FAT	regulation of macromolecule biosynthetic process	1515	28.3	1.3e-45	7.1e-43
GOTERM_BP_FAT	RNA splicing	246	4.6	1.8e-44	9.3e-42
GOTERM_BP_FAT	cellular localization	1011	18.9	1.5e-43	7.1e-41
GOTERM_BP_FAT	protein modification by small protein conjugation or removal	487	9.1	4.7e-41	2.2e-38
GOTERM_BP_FAT	RNA biosynthetic process	1430	26.7	2.3e-40	1e-37
GOTERM_BP_FAT	regulation of nucleobase-containing compound metabolic process	1490	27.9	4.5e-40	1.9e-37
GOTERM_BP_FAT	cellular response to stress	740	13.8	5.9e-39	2.4e-36
GOTERM_BP_FAT	nucleic acid-templated transcription	1382	25.9	7.1e-39	2.8e-36
GOTERM_BP_FAT	protein modification by small protein conjugation	428	8	7.4e-39	2.8e-36
GOTERM_BP_FAT	DNA metabolic process	466	8.7	3.3e-38	1.2e-35
GOTERM_BP_FAT	establishment of localization in cell	814	15.2	5.5e-38	1.9e-35
GOTERM_BP_FAT	cellular macromolecule catabolic process	457	8.5	2e-37	6.9e-35
GOTERM_BP_FAT	posttranscriptional regulation of gene expression	263	4.9	7.6e-37	2.5e-34
GOTERM_BP_FAT	regulation of RNA metabolic process	1369	25.6	1.3e-36	4.1e-34
GOTERM_BP_FAT	RNA splicing, via transesterification reactions	190	3.6	4.7e-36	1.4e-33
GOTERM_BP_FAT	transcription, DNA-templated	1315	24.6	1.9e-35	5.9e-33
GOTERM_BP_FAT	RNA splicing, via transesterification reactions with bulged adenosine as nucleophile	186	3.5	1.2e-34	3.6e-32
GOTERM_BP_FAT	mRNA splicing, via spliceosome	186	3.5	1.2e-34	3.6e-32
GOTERM_BP_FAT	cellular component biogenesis	1094	20.5	2.3e-34	6.7e-32
GOTERM_BP_FAT	ribonucleoprotein complex biogenesis	261	4.9	3.5e-34	9.8e-32
GOTERM_BP_FAT	cellular response to DNA damage stimulus	384	7.2	3.3e-33	9e-31
GOTERM_BP_FAT	cell cycle phase transition	284	5.3	1.6e-32	4.3e-30
GOTERM_BP_FAT	macromolecule catabolic process	519	9.7	2.7e-31	7.1e-29
GOTERM_BP_FAT	ncRNA metabolic process	290	5.4	3.2e-31	8.1e-29
GOTERM_BP_FAT	mitotic cell cycle phase transition	268	5	4.3e-31	1.1e-28
GOTERM_BP_FAT	regulation of nucleic acid-templated transcription	1297	24.3	2.1e-30	4.9e-28
GOTERM_BP_FAT	regulation of RNA biosynthetic process	1302	24.4	3e-30	7.1e-28
GOTERM_BP_FAT	regulation of transcription, DNA-templated	1289	24.1	3.6e-30	8.4e-28
GOTERM_BP_FAT	cellular macromolecule localization	654	12.2	7.9e-30	1.8e-27
GOTERM_BP_FAT	modification-dependent macromolecule catabolic process	295	5.5	1.3e-29	3e-27
GOTERM_BP_FAT	cellular protein localization	648	12.1	2.2e-29	4.8e-27
GOTERM_BP_FAT	protein localization	924	17.3	2.3e-29	4.9e-27
GOTERM_BP_FAT	macromolecular complex assembly	683	12.8	5.6e-29	1.2e-26
GOTERM_BP_FAT	covalent chromatin modification	276	5.2	1.7e-28	3.5e-26
GOTERM_BP_FAT	ubiquitin-dependent protein catabolic process	286	5.3	2.2e-28	4.4e-26
GOTERM_BP_FAT	modification-dependent protein catabolic process	289	5.4	2.3e-28	4.4e-26
GOTERM_BP_FAT	macromolecule localization	1035	19.4	4e-28	7.7e-26
GOTERM_BP_FAT	establishment of protein localization	779	14.6	1.5e-27	2.8e-25
GOTERM_BP_FAT	cellular protein catabolic process	325	6.1	2.7e-27	4.9e-25
GOTERM_BP_FAT	proteasomal protein catabolic process	216	4	2.9e-27	5.3e-25
GOTERM_BP_FAT	DNA repair	265	5	4.5e-27	8.1e-25
GOTERM_BP_FAT	protein localization to organelle	401	7.5	4.7e-27	8.4e-25
GOTERM_BP_FAT	translation	306	5.7	8.2e-27	1.4e-24
GOTERM_BP_FAT	regulation of organelle organization	487	9.1	1e-26	1.7e-24
GOTERM_BP_FAT	protein catabolic process	367	6.9	1.6e-26	2.8e-24
GOTERM_BP_FAT	protein ubiquitination	352	6.6	2e-26	3.4e-24
GOTERM_BP_FAT	proteasome-mediated ubiquitin-dependent protein catabolic process	203	3.8	2.2e-26	3.5e-24
GOTERM_BP_FAT	peptidyl-lysine modification	215	4	4.9e-26	7.8e-24
GOTERM_BP_FAT	cellular protein modification process	1332	24.9	7e-26	1.1e-23
GOTERM_BP_FAT	protein modification process	1332	24.9	7e-26	1.1e-23
GOTERM_BP_FAT	regulation of translation	189	3.5	7.5e-26	1.2e-23
GOTERM_BP_FAT	proteolysis involved in cellular protein catabolic process	309	5.8	1e-25	1.5e-23
GOTERM_BP_FAT	peptide biosynthetic process	310	5.8	9.4e-25	1.4e-22
GOTERM_BP_FAT	cellular component assembly	956	17.9	9.9e-25	1.5e-22
GOTERM_BP_FAT	cell division	276	5.2	1.1e-24	1.6e-22
GOTERM_BP_FAT	regulation of cellular amide metabolic process	198	3.7	3.4e-24	4.9e-22
GOTERM_BP_FAT	mitotic nuclear division	220	4.1	4.5e-24	6.4e-22
GOTERM_BP_FAT	nuclear transport	236	4.4	5e-24	7e-22
GOTERM_BP_FAT	nucleocytoplasmic transport	232	4.3	1.2e-23	1.7e-21
GOTERM_BP_FAT	amide biosynthetic process	331	6.2	2.1e-23	2.8e-21
GOTERM_BP_FAT	cellular macromolecular complex assembly	424	7.9	3.6e-23	4.8e-21
GOTERM_BP_FAT	ribonucleoprotein complex subunit organization	134	2.5	3.8e-23	5e-21
GOTERM_BP_FAT	sister chromatid segregation	134	2.5	6.7e-23	8.9e-21
GOTERM_BP_FAT	chromosome segregation	179	3.3	1e-22	1.3e-20
GOTERM_BP_FAT	intracellular protein transport	427	8	1.8e-22	2.3e-20
GOTERM_BP_FAT	ribonucleoprotein complex assembly	128	2.4	2.1e-22	2.6e-20
GOTERM_BP_FAT	single-organism organelle organization	624	11.7	2.1e-22	2.6e-20
GOTERM_BP_FAT	protein transport	704	13.2	2.4e-22	3e-20
GOTERM_BP_FAT	regulation of chromosome organization	159	3	5.3e-22	6.6e-20
GOTERM_BP_FAT	mitochondrion organization	297	5.6	5.7e-22	6.9e-20
GOTERM_BP_FAT	histone modification	218	4.1	8.8e-22	1.1e-19
GOTERM_BP_FAT	Golgi vesicle transport	171	3.2	9.1e-22	1.1e-19
GOTERM_BP_FAT	RNA localization	126	2.4	1.7e-21	2e-19
GOTERM_BP_FAT	regulation of cell cycle	408	7.6	2.4e-21	2.7e-19
GOTERM_BP_FAT	regulation of mitotic cell cycle phase transition	166	3.1	1e-20	1.2e-18
GOTERM_BP_FAT	ribonucleoprotein complex localization	86	1.6	1.6e-20	1.8e-18
GOTERM_BP_FAT	regulation of cell cycle process	271	5.1	3.2e-20	3.6e-18
GOTERM_BP_FAT	regulation of cellular component organization	840	15.7	3.7e-20	4.1e-18
GOTERM_BP_FAT	cellular catabolic process	614	11.5	7e-20	7.7e-18
GOTERM_BP_FAT	nuclear export	112	2.1	7.6e-20	8.3e-18
GOTERM_BP_FAT	regulation of cell cycle phase transition	173	3.2	1.3e-19	1.4e-17
GOTERM_BP_FAT	protein complex subunit organization	629	11.8	4.2e-19	4.5e-17
GOTERM_BP_FAT	regulation of mitotic cell cycle	229	4.3	9.8e-19	1e-16
GOTERM_BP_FAT	chromatin organization	327	6.1	1.2e-18	1.2e-16
GOTERM_BP_FAT	cellular amide metabolic process	404	7.6	1.2e-18	1.3e-16
GOTERM_BP_FAT	peptide metabolic process	344	6.4	1.4e-18	1.4e-16
GOTERM_BP_FAT	establishment of protein localization to organelle	291	5.4	1.6e-18	1.6e-16
GOTERM_BP_FAT	organelle fission	275	5.1	2.3e-18	2.3e-16
GOTERM_BP_FAT	RNA export from nucleus	82	1.5	2.5e-18	2.5e-16
GOTERM_BP_FAT	nuclear division	260	4.9	5.3e-18	5.2e-16
GOTERM_BP_FAT	endomembrane system organization	251	4.7	7.4e-18	7.2e-16
GOTERM_BP_FAT	protein polyubiquitination	136	2.5	7.6e-18	7.3e-16
GOTERM_BP_FAT	ribonucleoprotein complex export from nucleus	79	1.5	7.6e-18	7.4e-16
GOTERM_BP_FAT	autophagy	199	3.7	1.4e-17	1.3e-15
GOTERM_BP_FAT	ncRNA processing	196	3.7	2e-17	1.9e-15
GOTERM_BP_FAT	establishment of RNA localization	105	2	2.6e-17	2.5e-15
GOTERM_BP_FAT	regulation of protein catabolic process	180	3.4	3.7e-17	3.4e-15
GOTERM_BP_FAT	nuclear chromosome segregation	148	2.8	5.1e-17	4.7e-15
GOTERM_BP_FAT	mRNA export from nucleus	71	1.3	8.5e-17	1e-14
GOTERM_BP_FAT	mRNA-containing ribonucleoprotein complex export from nucleus	71	1.3	8.5e-17	1e-14
GOTERM_BP_FAT	protein sumoylation	84	1.6	1.2e-16	1e-14
GOTERM_BP_FAT	RNA transport	103	1.9	6.7e-17	1e-14
GOTERM_BP_FAT	nucleic acid transport	103	1.9	6.7e-17	1e-14
GOTERM_BP_FAT	multi-organism cellular process	389	7.3	2.4e-16	2e-14
GOTERM_BP_FAT	viral process	388	7.3	1.7e-16	2e-14
GOTERM_BP_FAT	negative regulation of macromolecule metabolic process	822	15.4	3.1e-16	2.9e-14
GOTERM_BP_FAT	regulation of RNA stability	92	1.7	3e-16	2.9e-14
GOTERM_BP_FAT	regulation of mRNA stability	89	1.7	2.9e-16	2.9e-14
GOTERM_BP_FAT	mRNA transport	89	1.7	4.3e-16	3.8e-14
GOTERM_BP_FAT	DNA replication	147	2.7	6.5e-16	5.6e-14
GOTERM_BP_FAT	regulation of DNA metabolic process	177	3.3	8.5e-16	7.5e-14
GOTERM_BP_FAT	vacuolar transport	146	2.7	1.2e-15	1e-13
GOTERM_BP_FAT	regulation of catabolic process	227	4.2	1.4e-15	1.2e-13
GOTERM_BP_FAT	regulation of cellular protein catabolic process	131	2.5	1.6e-15	1.3e-13
GOTERM_BP_FAT	positive regulation of protein catabolic process	133	2.5	2.2e-15	1.8e-13
GOTERM_BP_FAT	symbiosis, encompassing mutualism through parasitism	393	7.4	3.1e-15	2.5e-13
GOTERM_BP_FAT	interspecies interaction between organisms	393	7.4	3.1e-15	2.5e-13
GOTERM_BP_FAT	regulation of proteolysis involved in cellular protein catabolic process	122	2.3	3.3e-15	2.7e-13
GOTERM_BP_FAT	positive regulation of protein modification by small protein conjugation or removal	109	2	4e-15	3.2e-13
GOTERM_BP_FAT	peptidyl-amino acid modification	454	8.5	4.2e-15	3.3e-13
GOTERM_BP_FAT	ribosome biogenesis	162	3	4.8e-15	3.8e-13
GOTERM_BP_FAT	nucleobase-containing compound transport	114	2.1	5.3e-15	4.1e-13
GOTERM_BP_FAT	positive regulation of catabolic process	161	3	6e-15	4.6e-13
GOTERM_BP_FAT	protein complex assembly	537	10	6.8e-15	5.2e-13
GOTERM_BP_FAT	nucleus organization	86	1.6	7.6e-15	5.8e-13
GOTERM_BP_FAT	protein complex biogenesis	537	10	7.8e-15	6e-13
GOTERM_BP_FAT	regulation of protein modification by small protein conjugation or removal	139	2.6	8.6e-15	6.4e-13
GOTERM_BP_FAT	cellular component disassembly	222	4.2	8.8e-15	6.6e-13
GOTERM_BP_FAT	RNA 3'-end processing	73	1.4	1.2e-14	9e-13
GOTERM_BP_FAT	DNA-dependent DNA replication	86	1.6	1.3e-14	9.8e-13
GOTERM_BP_FAT	positive regulation of cellular protein catabolic process	103	1.9	1.5e-14	1.1e-12
GOTERM_BP_FAT	regulation of cellular response to stress	248	4.6	3.1e-14	2.2e-12
GOTERM_BP_FAT	negative regulation of metabolic process	869	16.3	4e-14	2.9e-12
GOTERM_BP_FAT	regulation of mRNA metabolic process	80	1.5	4.2e-14	3e-12
GOTERM_BP_FAT	negative regulation of gene expression	545	10.2	5.8e-14	4.1e-12
GOTERM_BP_FAT	protein targeting	288	5.4	6.8e-14	4.8e-12
GOTERM_BP_FAT	mRNA 3'-end processing	59	1.1	8.4e-14	5.9e-12
GOTERM_BP_FAT	positive regulation of cellular catabolic process	135	2.5	9.1e-14	6.3e-12
GOTERM_BP_FAT	regulation of cellular catabolic process	174	3.3	9.3e-14	6.5e-12
GOTERM_BP_FAT	mitotic sister chromatid segregation	83	1.6	1.2e-13	8.5e-12
GOTERM_BP_FAT	positive regulation of proteolysis involved in cellular protein catabolic process	95	1.8	1.3e-13	8.7e-12
GOTERM_BP_FAT	sister chromatid cohesion	77	1.4	1.3e-13	8.9e-12
GOTERM_BP_FAT	DNA-templated transcription, termination	66	1.2	1.4e-13	9.3e-12
GOTERM_BP_FAT	endosomal transport	126	2.4	1.6e-13	1.1e-11
GOTERM_BP_FAT	positive regulation of organelle organization	252	4.7	1.7e-13	1.1e-11
GOTERM_BP_FAT	protein ubiquitination involved in ubiquitin-dependent protein catabolic process	115	2.2	1.8e-13	1.2e-11
GOTERM_BP_FAT	regulation of cellular response to heat	53	1	3.3e-13	2.2e-11
GOTERM_BP_FAT	cell cycle checkpoint	117	2.2	3.8e-13	2.5e-11
GOTERM_BP_FAT	positive regulation of macromolecule metabolic process	964	18	4.2e-13	2.7e-11
GOTERM_BP_FAT	protein localization to nucleus	167	3.1	4.3e-13	2.8e-11
GOTERM_BP_FAT	regulation of protein metabolic process	859	16.1	4.5e-13	2.9e-11
GOTERM_BP_FAT	nuclear envelope organization	57	1.1	4.8e-13	3.1e-11
GOTERM_BP_FAT	negative regulation of translation	84	1.6	4.8e-13	3.1e-11
GOTERM_BP_FAT	regulation of autophagy	132	2.5	5.1e-13	3.2e-11
GOTERM_BP_FAT	transcription from RNA polymerase II promoter	645	12.1	5.7e-13	3.6e-11
GOTERM_BP_FAT	negative regulation of nitrogen compound metabolic process	546	10.2	6.4e-13	4e-11
GOTERM_BP_FAT	positive regulation of protein ubiquitination	98	1.8	6.5e-13	4e-11
GOTERM_BP_FAT	cell cycle G1/S phase transition	122	2.3	8e-13	5e-11
GOTERM_BP_FAT	G1/S transition of mitotic cell cycle	114	2.1	1.1e-12	6.7e-11
GOTERM_BP_FAT	regulation of protein ubiquitination	125	2.3	1.2e-12	7.3e-11
GOTERM_BP_FAT	regulation of cellular protein metabolic process	805	15.1	1.4e-12	8.3e-11
GOTERM_BP_FAT	DNA duplex unwinding	52	1	1.8e-12	1.1e-10
GOTERM_BP_FAT	ncRNA transcription	62	1.2	1.9e-12	1.1e-10
GOTERM_BP_FAT	ER to Golgi vesicle-mediated transport	95	1.8	1.9e-12	1.2e-10
GOTERM_BP_FAT	DNA geometric change	54	1	3e-12	1.8e-10
GOTERM_BP_FAT	negative regulation of chromosome organization	66	1.2	5.8e-12	3.4e-10
GOTERM_BP_FAT	single-organism cellular localization	412	7.7	5.8e-12	3.4e-10
GOTERM_BP_FAT	negative regulation of cellular amide metabolic process	85	1.6	7e-12	4.1e-10
GOTERM_BP_FAT	cytosolic transport	80	1.5	8e-12	4.6e-10
GOTERM_BP_FAT	DNA-templated transcription, elongation	70	1.3	8.2e-12	4.7e-10
GOTERM_BP_FAT	telomere maintenance	76	1.4	1.1e-11	6.5e-10
GOTERM_BP_FAT	regulation of mRNA processing	63	1.2	1.8e-11	1e-09
GOTERM_BP_FAT	membrane disassembly	37	0.7	2.1e-11	1.2e-09
GOTERM_BP_FAT	nuclear envelope disassembly	37	0.7	2.1e-11	1.2e-09
GOTERM_BP_FAT	negative regulation of cellular macromolecule biosynthetic process	479	9	3.1e-11	1.8e-09
GOTERM_BP_FAT	response to endoplasmic reticulum stress	127	2.4	4e-11	2.3e-09
GOTERM_BP_FAT	negative regulation of cellular metabolic process	794	14.9	4.9e-11	2.7e-09
GOTERM_BP_FAT	organonitrogen compound biosynthetic process	494	9.2	4.9e-11	2.7e-09
GOTERM_BP_FAT	positive regulation of cellular component organization	433	8.1	5.2e-11	2.9e-09
GOTERM_BP_FAT	tRNA-containing ribonucleoprotein complex export from nucleus	28	0.5	5.3e-11	2.9e-09
GOTERM_BP_FAT	tRNA export from nucleus	28	0.5	5.3e-11	2.9e-09
GOTERM_BP_FAT	macromolecular complex disassembly	124	2.3	5.7e-11	3.1e-09
GOTERM_BP_FAT	negative regulation of macromolecule biosynthetic process	507	9.5	6.1e-11	3.3e-09
GOTERM_BP_FAT	rRNA metabolic process	129	2.4	6.5e-11	3.5e-09
GOTERM_BP_FAT	transcription elongation from RNA polymerase II promoter	59	1.1	6.8e-11	3.7e-09
GOTERM_BP_FAT	positive regulation of cellular metabolic process	942	17.6	7.2e-11	3.8e-09
GOTERM_BP_FAT	tRNA transport	29	0.5	7.3e-11	3.9e-09
GOTERM_BP_FAT	anaphase-promoting complex-dependent catabolic process	51	1	7.6e-11	4e-09
GOTERM_BP_FAT	regulation of cellular protein localization	229	4.3	7.7e-11	4.1e-09
GOTERM_BP_FAT	DNA integrity checkpoint	84	1.6	7.8e-11	4.1e-09
GOTERM_BP_FAT	macromolecule methylation	125	2.3	8.5e-11	4.4e-09
GOTERM_BP_FAT	regulation of ubiquitin-protein transferase activity	68	1.3	1e-10	5.2e-09
GOTERM_BP_FAT	gene silencing	120	2.2	1e-10	5.2e-09
GOTERM_BP_FAT	regulation of macroautophagy	70	1.3	1.1e-10	5.5e-09
GOTERM_BP_FAT	vesicle-mediated transport	529	9.9	1.2e-10	6.2e-09
GOTERM_BP_FAT	nucleotide-excision repair	67	1.3	1.2e-10	6.2e-09
GOTERM_BP_FAT	positive regulation of chromosome organization	80	1.5	1.2e-10	6.2e-09
GOTERM_BP_FAT	retrograde vesicle-mediated transport, Golgi to ER	52	1	1.3e-10	6.4e-09
GOTERM_BP_FAT	spindle organization	64	1.2	1.4e-10	6.8e-09
GOTERM_BP_FAT	positive regulation of ubiquitin-protein transferase activity	61	1.1	1.4e-10	7.2e-09
GOTERM_BP_FAT	vacuole organization	105	2	1.5e-10	7.2e-09
GOTERM_BP_FAT	RNA catabolic process	118	2.2	1.6e-10	7.7e-09
GOTERM_BP_FAT	positive regulation of metabolic process	1003	18.8	1.7e-10	8.2e-09
GOTERM_BP_FAT	protein complex disassembly	119	2.2	1.7e-10	8.3e-09
GOTERM_BP_FAT	positive regulation of ubiquitin-protein ligase activity involved in regulation of mitotic cell cycle transition	49	0.9	2e-10	9.9e-09
GOTERM_BP_FAT	rRNA processing	125	2.3	2.1e-10	1e-08
GOTERM_BP_FAT	DNA damage checkpoint	79	1.5	2.4e-10	1.1e-08
GOTERM_BP_FAT	positive regulation of nitrogen compound metabolic process	612	11.4	2.4e-10	1.2e-08
GOTERM_BP_FAT	telomere maintenance via telomere lengthening	42	0.8	2.5e-10	1.2e-08
GOTERM_BP_FAT	microtubule cytoskeleton organization	181	3.4	2.8e-10	1.4e-08
GOTERM_BP_FAT	single-organism intracellular transport	271	5.1	3.1e-10	1.5e-08
GOTERM_BP_FAT	macroautophagy	100	1.9	3.1e-10	1.5e-08
GOTERM_BP_FAT	protein import	146	2.7	3.4e-10	1.6e-08
GOTERM_BP_FAT	positive regulation of nucleobase-containing compound metabolic process	577	10.8	3.7e-10	1.7e-08
GOTERM_BP_FAT	nuclear import	135	2.5	4.1e-10	1.9e-08
GOTERM_BP_FAT	regulation of chromosome segregation	52	1	4.4e-10	2e-08
GOTERM_BP_FAT	telomere organization	78	1.5	4.5e-10	2.1e-08
GOTERM_BP_FAT	positive regulation of protein ubiquitination involved in ubiquitin-dependent protein catabolic process	55	1	4.6e-10	2.1e-08
GOTERM_BP_FAT	positive regulation of ubiquitin protein ligase activity	51	1	5.3e-10	2.4e-08
GOTERM_BP_FAT	methylation	147	2.7	5.9e-10	2.7e-08
GOTERM_BP_FAT	protein folding	109	2	6e-10	2.7e-08
GOTERM_BP_FAT	regulation of protein ubiquitination involved in ubiquitin-dependent protein catabolic process	59	1.1	6.3e-10	2.8e-08
GOTERM_BP_FAT	membrane budding	61	1.1	7e-10	3.2e-08
GOTERM_BP_FAT	positive regulation of proteolysis	155	2.9	8.2e-10	3.7e-08
GOTERM_BP_FAT	negative regulation of organelle organization	139	2.6	8.8e-10	3.9e-08
GOTERM_BP_FAT	gene silencing by RNA	82	1.5	9.2e-10	4.1e-08
GOTERM_BP_FAT	tRNA metabolic process	92	1.7	9.2e-10	4.1e-08
GOTERM_BP_FAT	organelle localization	200	3.7	9.3e-10	4.1e-08
GOTERM_BP_FAT	regulation of telomere maintenance via telomere lengthening	36	0.7	9.4e-10	4.1e-08
GOTERM_BP_FAT	DNA biosynthetic process	98	1.8	9.6e-10	4.2e-08
GOTERM_BP_FAT	regulation of translational initiation	51	1	9.6e-10	4.2e-08
GOTERM_BP_FAT	spliceosomal snRNP assembly	30	0.6	9.6e-10	4.2e-08
GOTERM_BP_FAT	regulation of protein stability	108	2	1e-09	4.4e-08
GOTERM_BP_FAT	mitotic nuclear envelope disassembly	33	0.6	1e-09	4.5e-08
GOTERM_BP_FAT	microtubule-based process	243	4.5	1.1e-09	4.8e-08
GOTERM_BP_FAT	regulation of ubiquitin-protein ligase activity involved in mitotic cell cycle	46	0.9	1.2e-09	5.2e-08
GOTERM_BP_FAT	DNA recombination	120	2.2	1.5e-09	6.2e-08
GOTERM_BP_FAT	cell cycle G2/M phase transition	96	1.8	1.5e-09	6.4e-08
GOTERM_BP_FAT	internal peptidyl-lysine acetylation	78	1.5	1.5e-09	6.4e-08
GOTERM_BP_FAT	peptidyl-lysine acetylation	83	1.6	1.6e-09	6.7e-08
GOTERM_BP_FAT	negative regulation of protein modification process	229	4.3	1.6e-09	6.8e-08
GOTERM_BP_FAT	internal protein amino acid acetylation	80	1.5	2.1e-09	8.8e-08
GOTERM_BP_FAT	establishment of organelle localization	175	3.3	2.2e-09	9.2e-08
GOTERM_BP_FAT	in utero embryonic development	144	2.7	2.3e-09	9.6e-08
GOTERM_BP_FAT	negative regulation of ubiquitin-protein transferase activity	49	0.9	2.5e-09	1e-07
GOTERM_BP_FAT	negative regulation of ubiquitin-protein ligase activity involved in mitotic cell cycle	45	0.8	2.8e-09	1.1e-07
GOTERM_BP_FAT	positive regulation of macromolecule biosynthetic process	552	10.3	3.1e-09	1.3e-07
GOTERM_BP_FAT	mRNA catabolic process	104	1.9	3.3e-09	1.4e-07
GOTERM_BP_FAT	protein acetylation	92	1.7	3.6e-09	1.5e-07
GOTERM_BP_FAT	regulation of sister chromatid segregation	43	0.8	3.8e-09	1.5e-07
GOTERM_BP_FAT	mitochondrial transport	124	2.3	4.2e-09	1.7e-07
GOTERM_BP_FAT	histone acetylation	75	1.4	4.4e-09	1.8e-07
GOTERM_BP_FAT	double-strand break repair	98	1.8	4.9e-09	2e-07
GOTERM_BP_FAT	regulation of ubiquitin protein ligase activity	51	1	5.3e-09	2.1e-07
GOTERM_BP_FAT	positive regulation of RNA metabolic process	494	9.2	5.3e-09	2.1e-07
GOTERM_BP_FAT	negative regulation of mitotic cell cycle phase transition	78	1.5	7e-09	2.8e-07
GOTERM_BP_FAT	G2/M transition of mitotic cell cycle	89	1.7	7.1e-09	2.8e-07
GOTERM_BP_FAT	regulation of telomere maintenance	43	0.8	7.3e-09	2.9e-07
GOTERM_BP_FAT	membrane organization	371	6.9	8.5e-09	3.3e-07
GOTERM_BP_FAT	negative regulation of biosynthetic process	520	9.7	9.1e-09	3.6e-07
GOTERM_BP_FAT	negative regulation of protein ubiquitination	68	1.3	9.3e-09	3.6e-07
GOTERM_BP_FAT	negative regulation of mitotic cell cycle	102	1.9	9.4e-09	3.6e-07
GOTERM_BP_FAT	negative regulation of ubiquitin protein ligase activity	45	0.8	9.4e-09	3.6e-07
GOTERM_BP_FAT	regulation of RNA splicing	60	1.1	9.6e-09	3.7e-07
GOTERM_BP_FAT	termination of RNA polymerase II transcription	41	0.8	1e-08	3.9e-07
GOTERM_BP_FAT	tRNA aminoacylation	36	0.7	1e-08	4e-07
GOTERM_BP_FAT	mitotic sister chromatid separation	35	0.7	1.2e-08	4.5e-07
GOTERM_BP_FAT	spindle assembly	52	1	1.2e-08	4.7e-07
GOTERM_BP_FAT	viral life cycle	184	3.4	1.3e-08	4.7e-07
GOTERM_BP_FAT	negative regulation of cellular biosynthetic process	511	9.6	1.5e-08	5.8e-07
GOTERM_BP_FAT	phosphate-containing compound metabolic process	995	18.6	1.6e-08	5.9e-07
GOTERM_BP_FAT	regulation of telomere maintenance via telomerase	32	0.6	1.6e-08	5.9e-07
GOTERM_BP_FAT	mitotic cell cycle checkpoint	79	1.5	1.7e-08	6.2e-07
GOTERM_BP_FAT	protein acylation	102	1.9	1.7e-08	6.2e-07
GOTERM_BP_FAT	protein methylation	82	1.5	1.7e-08	6.3e-07
GOTERM_BP_FAT	protein alkylation	82	1.5	1.7e-08	6.3e-07
GOTERM_BP_FAT	positive regulation of gene expression	576	10.8	1.7e-08	6.3e-07
GOTERM_BP_FAT	microtubule organizing center organization	65	1.2	1.8e-08	6.6e-07
GOTERM_BP_FAT	phosphorus metabolic process	996	18.6	1.9e-08	6.9e-07
GOTERM_BP_FAT	spliceosomal complex assembly	37	0.7	1.9e-08	6.9e-07
GOTERM_BP_FAT	amino acid activation	36	0.7	2.2e-08	7.9e-07
GOTERM_BP_FAT	vesicle targeting	46	0.9	2.5e-08	8.9e-07
GOTERM_BP_FAT	regulation of proteasomal protein catabolic process	74	1.4	2.5e-08	8.9e-07
GOTERM_BP_FAT	nuclear-transcribed mRNA catabolic process	96	1.8	2.6e-08	9.2e-07
GOTERM_BP_FAT	negative regulation of cellular protein metabolic process	357	6.7	2.7e-08	9.6e-07
GOTERM_BP_FAT	tRNA aminoacylation for protein translation	34	0.6	2.8e-08	1e-06
GOTERM_BP_FAT	multi-organism intracellular transport	42	0.8	3e-08	1.1e-06
GOTERM_BP_FAT	multi-organism cellular localization	42	0.8	3e-08	1.1e-06
GOTERM_BP_FAT	negative regulation of cell cycle phase transition	81	1.5	3e-08	1.1e-06
GOTERM_BP_FAT	cytoskeleton organization	404	7.6	3.6e-08	1.3e-06
GOTERM_BP_FAT	regulation of gene expression, epigenetic	116	2.2	3.8e-08	1.3e-06
GOTERM_BP_FAT	protein import into nucleus	122	2.3	3.8e-08	1.3e-06
GOTERM_BP_FAT	protein targeting to nucleus	122	2.3	3.8e-08	1.3e-06
GOTERM_BP_FAT	RNA secondary structure unwinding	31	0.6	3.9e-08	1.4e-06
GOTERM_BP_FAT	metaphase/anaphase transition of mitotic cell cycle	30	0.6	4.3e-08	1.5e-06
GOTERM_BP_FAT	macromolecule deacylation	55	1	4.5e-08	1.6e-06
GOTERM_BP_FAT	RNA polyadenylation	29	0.5	4.6e-08	1.6e-06
GOTERM_BP_FAT	Wnt signaling pathway	186	3.5	4.7e-08	1.6e-06
GOTERM_BP_FAT	single-organism nuclear import	122	2.3	4.9e-08	1.7e-06
GOTERM_BP_FAT	apoptotic signaling pathway	224	4.2	5e-08	1.7e-06
GOTERM_BP_FAT	telomere maintenance via telomerase	35	0.7	5.1e-08	1.7e-06
GOTERM_BP_FAT	positive regulation of RNA biosynthetic process	473	8.8	5.3e-08	1.8e-06
GOTERM_BP_FAT	multi-organism metabolic process	98	1.8	5.3e-08	1.8e-06
GOTERM_BP_FAT	cell-cell signaling by wnt	186	3.5	5.6e-08	1.9e-06
GOTERM_BP_FAT	negative regulation of protein metabolic process	373	7	5.7e-08	1.9e-06
GOTERM_BP_FAT	cellular protein complex assembly	221	4.1	6.1e-08	2e-06
GOTERM_BP_FAT	intracellular transport of virus	41	0.8	6.4e-08	2.2e-06
GOTERM_BP_FAT	negative regulation of nucleobase-containing compound metabolic process	473	8.8	6.5e-08	2.2e-06
GOTERM_BP_FAT	regulation of mitotic sister chromatid separation	33	0.6	6.7e-08	2.2e-06
GOTERM_BP_FAT	regulation of mitochondrion organization	103	1.9	7.2e-08	2.4e-06
GOTERM_BP_FAT	COPII-coated vesicle budding	40	0.7	7.8e-08	2.6e-06
GOTERM_BP_FAT	snRNA metabolic process	48	0.9	7.8e-08	2.6e-06
GOTERM_BP_FAT	regulation of organelle assembly	78	1.5	8.1e-08	2.7e-06
GOTERM_BP_FAT	regulation of mitotic sister chromatid segregation	36	0.7	8.5e-08	2.8e-06
GOTERM_BP_FAT	protein deacetylation	52	1	8.6e-08	2.8e-06
GOTERM_BP_FAT	negative regulation of protein modification by small protein conjugation or removal	70	1.3	8.6e-08	2.8e-06
GOTERM_BP_FAT	protein deacylation	54	1	8.7e-08	2.8e-06
GOTERM_BP_FAT	snRNA transcription	42	0.8	9.4e-08	3e-06
GOTERM_BP_FAT	snRNA transcription from RNA polymerase II promoter	42	0.8	9.4e-08	3e-06
GOTERM_BP_FAT	centrosome organization	59	1.1	1e-07	3.3e-06
GOTERM_BP_FAT	antigen processing and presentation of exogenous peptide antigen	78	1.5	1.1e-07	3.6e-06
GOTERM_BP_FAT	posttranscriptional gene silencing	38	0.7	1.1e-07	3.6e-06
GOTERM_BP_FAT	posttranscriptional gene silencing by RNA	38	0.7	1.1e-07	3.6e-06
GOTERM_BP_FAT	negative regulation of cell cycle	185	3.5	1.1e-07	3.7e-06
GOTERM_BP_FAT	mRNA polyadenylation	28	0.5	1.2e-07	3.7e-06
GOTERM_BP_FAT	viral gene expression	89	1.7	1.2e-07	3.7e-06
GOTERM_BP_FAT	DNA-templated transcription, initiation	103	1.9	1.2e-07	3.9e-06
GOTERM_BP_FAT	chromosome separation	43	0.8	1.3e-07	4.2e-06
GOTERM_BP_FAT	protein stabilization	68	1.3	1.4e-07	4.3e-06
GOTERM_BP_FAT	metaphase/anaphase transition of cell cycle	33	0.6	1.4e-07	4.3e-06
GOTERM_BP_FAT	regulation of chromatin organization	77	1.4	1.4e-07	4.4e-06
GOTERM_BP_FAT	negative regulation of cell cycle process	106	2	1.4e-07	4.4e-06
GOTERM_BP_FAT	gene silencing by miRNA	36	0.7	1.6e-07	5e-06
GOTERM_BP_FAT	regulation of transcription from RNA polymerase II promoter	612	11.4	1.7e-07	5.1e-06
GOTERM_BP_FAT	regulation of response to DNA damage stimulus	76	1.4	1.7e-07	5.4e-06
GOTERM_BP_FAT	positive regulation of nucleic acid-templated transcription	463	8.7	1.8e-07	5.7e-06
GOTERM_BP_FAT	positive regulation of transcription, DNA-templated	463	8.7	1.8e-07	5.7e-06
GOTERM_BP_FAT	positive regulation of cellular biosynthetic process	579	10.8	2.1e-07	6.3e-06
GOTERM_BP_FAT	regulation of transferase activity	340	6.4	2.1e-07	6.4e-06
GOTERM_BP_FAT	mitochondrial translation	61	1.1	2.1e-07	6.6e-06
GOTERM_BP_FAT	multi-organism localization	43	0.8	2.2e-07	6.8e-06
GOTERM_BP_FAT	transcription-coupled nucleotide-excision repair	43	0.8	2.2e-07	6.8e-06
GOTERM_BP_FAT	multi-organism transport	43	0.8	2.2e-07	6.8e-06
GOTERM_BP_FAT	nucleoside monophosphate metabolic process	130	2.4	2.4e-07	7.2e-06
GOTERM_BP_FAT	Golgi organization	51	1	2.6e-07	8e-06
GOTERM_BP_FAT	regulation of cellular localization	301	5.6	2.7e-07	8.2e-06
GOTERM_BP_FAT	cellular protein complex disassembly	89	1.7	2.7e-07	8.3e-06
GOTERM_BP_FAT	organelle assembly	243	4.5	2.9e-07	8.6e-06
GOTERM_BP_FAT	cellular response to topologically incorrect protein	72	1.3	3e-07	9.1e-06
GOTERM_BP_FAT	histone deacetylation	46	0.9	3.2e-07	9.4e-06
GOTERM_BP_FAT	transport of virus	41	0.8	3.4e-07	1e-05
GOTERM_BP_FAT	regulation of mRNA splicing, via spliceosome	41	0.8	3.4e-07	1e-05
GOTERM_BP_FAT	transcription from RNA polymerase I promoter	35	0.7	3.5e-07	1.1e-05
GOTERM_BP_FAT	vesicle coating	38	0.7	3.6e-07	1.1e-05
GOTERM_BP_FAT	regulation of mitotic metaphase/anaphase transition	31	0.6	3.6e-07	1.1e-05
GOTERM_BP_FAT	negative regulation of cellular component organization	233	4.4	3.8e-07	1.1e-05
GOTERM_BP_FAT	chromatin remodeling	78	1.5	3.9e-07	1.1e-05
GOTERM_BP_FAT	positive regulation of DNA metabolic process	91	1.7	4.1e-07	1.2e-05
GOTERM_BP_FAT	ribonucleoside triphosphate metabolic process	116	2.2	4.1e-07	1.2e-05
GOTERM_BP_FAT	antigen processing and presentation of exogenous antigen	79	1.5	4.2e-07	1.2e-05
GOTERM_BP_FAT	regulation of histone modification	66	1.2	4.2e-07	1.2e-05
GOTERM_BP_FAT	COPII vesicle coating	37	0.7	4.4e-07	1.3e-05
GOTERM_BP_FAT	histone H4 acetylation	37	0.7	4.4e-07	1.3e-05
GOTERM_BP_FAT	vesicle targeting, rough ER to cis-Golgi	37	0.7	4.4e-07	1.3e-05
GOTERM_BP_FAT	intrinsic apoptotic signaling pathway	118	2.2	4.3e-07	1.3e-05
GOTERM_BP_FAT	positive regulation of viral life cycle	50	0.9	5e-07	1.5e-05
GOTERM_BP_FAT	single-organism membrane organization	309	5.8	6.1e-07	1.8e-05
GOTERM_BP_FAT	retrograde transport, endosome to Golgi	45	0.8	6.2e-07	1.8e-05
GOTERM_BP_FAT	negative regulation of transferase activity	144	2.7	6.4e-07	1.8e-05
GOTERM_BP_FAT	positive regulation of cellular protein localization	146	2.7	6.4e-07	1.8e-05
GOTERM_BP_FAT	DNA conformation change	119	2.2	6.9e-07	2e-05
GOTERM_BP_FAT	regulation of metaphase/anaphase transition of cell cycle	31	0.6	7.1e-07	2e-05
GOTERM_BP_FAT	microtubule nucleation	18	0.3	7.4e-07	2.1e-05
GOTERM_BP_FAT	regulation of proteasomal ubiquitin-dependent protein catabolic process	57	1.1	7.6e-07	2.2e-05
GOTERM_BP_FAT	regulation of signal transduction by p53 class mediator	76	1.4	8.1e-07	2.3e-05
GOTERM_BP_FAT	positive regulation of viral process	55	1	8.2e-07	2.3e-05
GOTERM_BP_FAT	response to UV	63	1.2	8.3e-07	2.3e-05
GOTERM_BP_FAT	mitotic recombination	30	0.6	8.4e-07	2.3e-05
GOTERM_BP_FAT	protein localization to mitochondrion	86	1.6	8.9e-07	2.5e-05
GOTERM_BP_FAT	ribonucleoside monophosphate metabolic process	123	2.3	9.2e-07	2.5e-05
GOTERM_BP_FAT	nucleobase-containing compound catabolic process	151	2.8	9.5e-07	2.6e-05
GOTERM_BP_FAT	positive regulation of autophagy	45	0.8	9.8e-07	2.7e-05
GOTERM_BP_FAT	vesicle targeting, to, from or within Golgi	38	0.7	1e-06	2.9e-05
GOTERM_BP_FAT	vesicle organization	122	2.3	1.1e-06	3e-05
GOTERM_BP_FAT	positive regulation of biosynthetic process	582	10.9	1.2e-06	3.3e-05
GOTERM_BP_FAT	nucleic acid phosphodiester bond hydrolysis	116	2.2	1.2e-06	3.4e-05
GOTERM_BP_FAT	negative regulation of DNA metabolic process	58	1.1	1.3e-06	3.4e-05
GOTERM_BP_FAT	endoplasmic reticulum unfolded protein response	64	1.2	1.3e-06	3.5e-05
GOTERM_BP_FAT	intra-Golgi vesicle-mediated transport	31	0.6	1.3e-06	3.6e-05
GOTERM_BP_FAT	purine ribonucleoside triphosphate metabolic process	112	2.1	1.4e-06	3.8e-05
GOTERM_BP_FAT	lysosomal transport	43	0.8	1.5e-06	4.1e-05
GOTERM_BP_FAT	regulation of protein modification process	552	10.3	1.6e-06	4.2e-05
GOTERM_BP_FAT	purine ribonucleoside monophosphate metabolic process	118	2.2	1.6e-06	4.2e-05
GOTERM_BP_FAT	nucleoside triphosphate metabolic process	122	2.3	1.7e-06	4.5e-05
GOTERM_BP_FAT	regulation of G1/S transition of mitotic cell cycle	67	1.3	1.7e-06	4.6e-05
GOTERM_BP_FAT	response to topologically incorrect protein	84	1.6	1.8e-06	4.7e-05
GOTERM_BP_FAT	purine nucleoside triphosphate metabolic process	114	2.1	1.8e-06	4.8e-05
GOTERM_BP_FAT	regulation of DNA-templated transcription, elongation	29	0.5	1.9e-06	5e-05
GOTERM_BP_FAT	regulation of mitophagy	29	0.5	1.9e-06	5e-05
GOTERM_BP_FAT	mitochondrial RNA metabolic process	24	0.4	1.9e-06	5.1e-05
GOTERM_BP_FAT	purine nucleoside monophosphate metabolic process	118	2.2	1.9e-06	5.1e-05
GOTERM_BP_FAT	translational elongation	65	1.2	2e-06	5.2e-05
GOTERM_BP_FAT	RNA-dependent DNA biosynthetic process	37	0.7	2.2e-06	5.7e-05
GOTERM_BP_FAT	ATP metabolic process	103	1.9	2.2e-06	5.8e-05
GOTERM_BP_FAT	histone methylation	63	1.2	2.2e-06	5.8e-05
GOTERM_BP_FAT	translational initiation	84	1.6	2.3e-06	6e-05
GOTERM_BP_FAT	negative regulation of RNA metabolic process	421	7.9	2.5e-06	6.6e-05
GOTERM_BP_FAT	viral transcription	81	1.5	2.6e-06	6.7e-05
GOTERM_BP_FAT	stimulatory C-type lectin receptor signaling pathway	53	1	2.7e-06	7e-05
GOTERM_BP_FAT	purine ribonucleoside metabolic process	141	2.6	2.7e-06	7.1e-05
GOTERM_BP_FAT	positive regulation of proteasomal protein catabolic process	46	0.9	2.8e-06	7.2e-05
GOTERM_BP_FAT	nuclear-transcribed mRNA catabolic process, deadenylation-dependent decay	40	0.7	2.9e-06	7.5e-05
GOTERM_BP_FAT	histone lysine methylation	51	1	2.9e-06	7.5e-05
GOTERM_BP_FAT	cell surface receptor signaling pathway involved in cell-cell signaling	197	3.7	2.9e-06	7.5e-05
GOTERM_BP_FAT	regulation of binding	122	2.3	3e-06	7.7e-05
GOTERM_BP_FAT	antigen processing and presentation of peptide antigen	80	1.5	3.2e-06	8.1e-05
GOTERM_BP_FAT	cellular response to unfolded protein	64	1.2	3.3e-06	8.5e-05
GOTERM_BP_FAT	dephosphorylation	163	3	3.6e-06	9e-05
GOTERM_BP_FAT	negative regulation of mRNA metabolic process	25	0.5	3.6e-06	9e-05
GOTERM_BP_FAT	negative regulation of sister chromatid segregation	25	0.5	3.6e-06	9e-05
GOTERM_BP_FAT	establishment of protein localization to mitochondrion	83	1.6	3.7e-06	9.2e-05
GOTERM_BP_FAT	ribonucleoside metabolic process	150	2.8	3.8e-06	9.6e-05
GOTERM_BP_FAT	regulation of DNA biosynthetic process	48	0.9	3.9e-06	9.9e-05
GOTERM_BP_FAT	positive regulation of macroautophagy	28	0.5	4.3e-06	0.00011
GOTERM_BP_FAT	regulation of DNA repair	44	0.8	4.4e-06	0.00011
GOTERM_BP_FAT	regulation of cellular component biogenesis	285	5.3	4.6e-06	0.00011
GOTERM_BP_FAT	purine nucleoside metabolic process	141	2.6	4.6e-06	0.00012
GOTERM_BP_FAT	telomere maintenance via recombination	23	0.4	4.7e-06	0.00012
GOTERM_BP_FAT	cytoplasmic translational initiation	15	0.3	5.3e-06	0.00013
GOTERM_BP_FAT	regulation of protein complex assembly	148	2.8	5.4e-06	0.00013
GOTERM_BP_FAT	innate immune response activating cell surface receptor signaling pathway	53	1	5.5e-06	0.00013
GOTERM_BP_FAT	regulation of cellular amino acid metabolic process	32	0.6	6.1e-06	0.00015
GOTERM_BP_FAT	cell death	635	11.9	6.5e-06	0.00016
GOTERM_BP_FAT	regulation of transcription elongation from RNA polymerase II promoter	19	0.4	6.7e-06	0.00016
GOTERM_BP_FAT	nucleoside metabolic process	158	3	7e-06	0.00017
GOTERM_BP_FAT	negative regulation of chromosome segregation	25	0.5	7.1e-06	0.00017
GOTERM_BP_FAT	transcription initiation from RNA polymerase II promoter	77	1.4	7.7e-06	0.00019
GOTERM_BP_FAT	positive regulation of apoptotic signaling pathway	78	1.5	8e-06	0.00019
GOTERM_BP_FAT	mRNA stabilization	24	0.4	8.4e-06	0.0002
GOTERM_BP_FAT	peptidyl-lysine methylation	54	1	8.6e-06	0.00021
GOTERM_BP_FAT	regulation of glucose transport	51	1	8.6e-06	0.00021
GOTERM_BP_FAT	endosome organization	37	0.7	8.9e-06	0.00021
GOTERM_BP_FAT	positive regulation of cell cycle	133	2.5	9.4e-06	0.00022
GOTERM_BP_FAT	positive regulation of mitochondrion organization	76	1.4	9.4e-06	0.00023
GOTERM_BP_FAT	response to unfolded protein	76	1.4	9.4e-06	0.00023
GOTERM_BP_FAT	positive regulation of protein metabolic process	498	9.3	9.7e-06	0.00023
GOTERM_BP_FAT	apoptotic process	570	10.7	9.8e-06	0.00023
GOTERM_BP_FAT	ATP-dependent chromatin remodeling	42	0.8	1e-05	0.00024
GOTERM_BP_FAT	global genome nucleotide-excision repair	22	0.4	1.1e-05	0.00027
GOTERM_BP_FAT	regulation of cell cycle G1/S phase transition	69	1.3	1.1e-05	0.00027
GOTERM_BP_FAT	positive regulation of telomere maintenance	29	0.5	1.1e-05	0.00027
GOTERM_BP_FAT	regulation of apoptotic signaling pathway	146	2.7	1.2e-05	0.00029
GOTERM_BP_FAT	phosphorylation	713	13.3	1.3e-05	0.0003
GOTERM_BP_FAT	centrosome cycle	41	0.8	1.3e-05	0.0003
GOTERM_BP_FAT	heterocycle catabolic process	156	2.9	1.3e-05	0.00031
GOTERM_BP_FAT	NIK/NF-kappaB signaling	52	1	1.3e-05	0.00031
GOTERM_BP_FAT	positive regulation of cellular protein metabolic process	470	8.8	1.4e-05	0.00032
GOTERM_BP_FAT	programmed cell death	600	11.2	1.4e-05	0.00033
GOTERM_BP_FAT	histone mRNA metabolic process	20	0.4	1.4e-05	0.00033
GOTERM_BP_FAT	rRNA transcription	20	0.4	1.4e-05	0.00033
GOTERM_BP_FAT	cellular nitrogen compound catabolic process	158	3	1.5e-05	0.00035
GOTERM_BP_FAT	transcription from RNA polymerase III promoter	30	0.6	1.6e-05	0.00036
GOTERM_BP_FAT	RNA modification	61	1.1	1.6e-05	0.00036
GOTERM_BP_FAT	RNA stabilization	24	0.4	1.6e-05	0.00037
GOTERM_BP_FAT	formation of translation preinitiation complex	18	0.3	1.7e-05	0.00039
GOTERM_BP_FAT	protein dephosphorylation	104	1.9	1.8e-05	0.00041
GOTERM_BP_FAT	DNA replication initiation	23	0.4	1.9e-05	0.00044
GOTERM_BP_FAT	negative regulation of mitotic sister chromatid segregation	23	0.4	1.9e-05	0.00044
GOTERM_BP_FAT	transcription initiation from RNA polymerase I promoter	22	0.4	2.3e-05	0.00052
GOTERM_BP_FAT	negative regulation of mitotic sister chromatid separation	22	0.4	2.3e-05	0.00052
GOTERM_BP_FAT	mitotic spindle checkpoint	22	0.4	2.3e-05	0.00052
GOTERM_BP_FAT	negative regulation of mitotic metaphase/anaphase transition	22	0.4	2.3e-05	0.00052
GOTERM_BP_FAT	positive regulation of telomere maintenance via telomere lengthening	22	0.4	2.3e-05	0.00052
GOTERM_BP_FAT	establishment or maintenance of cell polarity	74	1.4	2.3e-05	0.00053
GOTERM_BP_FAT	regulation of dephosphorylation	65	1.2	2.6e-05	0.00059
GOTERM_BP_FAT	negative regulation of mRNA processing	21	0.4	2.7e-05	0.0006
GOTERM_BP_FAT	cell cycle DNA replication	21	0.4	2.7e-05	0.0006
GOTERM_BP_FAT	regulation of intracellular transport	174	3.3	2.9e-05	0.00064
GOTERM_BP_FAT	microtubule cytoskeleton organization involved in mitosis	27	0.5	2.9e-05	0.00066
GOTERM_BP_FAT	regulation of DNA-dependent DNA replication	27	0.5	2.9e-05	0.00066
GOTERM_BP_FAT	negative regulation of G1/S transition of mitotic cell cycle	47	0.9	2.9e-05	0.00066
GOTERM_BP_FAT	glycosyl compound metabolic process	162	3	3e-05	0.00066
GOTERM_BP_FAT	cellular respiration	75	1.4	3.1e-05	0.00068
GOTERM_BP_FAT	Wnt signaling pathway, planar cell polarity pathway	51	1	3.2e-05	0.0007
GOTERM_BP_FAT	mitotic DNA integrity checkpoint	51	1	3.2e-05	0.0007
GOTERM_BP_FAT	regulation of molecular function	895	16.7	3.4e-05	0.00075
GOTERM_BP_FAT	regulation of establishment of planar polarity	52	1	3.4e-05	0.00076
GOTERM_BP_FAT	morphogenesis of a polarized epithelium	61	1.1	3.6e-05	0.00079
GOTERM_BP_FAT	insulin receptor signaling pathway	53	1	3.7e-05	0.00082
GOTERM_BP_FAT	Ras protein signal transduction	124	2.3	3.7e-05	0.00082
GOTERM_BP_FAT	G1 DNA damage checkpoint	38	0.7	3.8e-05	0.00083
GOTERM_BP_FAT	non-canonical Wnt signaling pathway	68	1.3	3.8e-05	0.00085
GOTERM_BP_FAT	ribosomal small subunit biogenesis	36	0.7	4e-05	0.00088
GOTERM_BP_FAT	protein monoubiquitination	30	0.6	4.2e-05	0.00092
GOTERM_BP_FAT	negative regulation of metaphase/anaphase transition of cell cycle	22	0.4	4.4e-05	0.00095
GOTERM_BP_FAT	nuclear DNA replication	17	0.3	4.4e-05	0.00096
GOTERM_BP_FAT	mitotic DNA damage checkpoint	48	0.9	4.5e-05	0.00098
GOTERM_BP_FAT	cap-independent translational initiation	13	0.2	4.5e-05	0.00098
GOTERM_BP_FAT	ERAD pathway	45	0.8	4.6e-05	0.001
GOTERM_BP_FAT	antigen processing and presentation of exogenous peptide antigen via MHC class II	45	0.8	4.6e-05	0.001
GOTERM_BP_FAT	positive regulation of transferase activity	226	4.2	4.7e-05	0.001
GOTERM_BP_FAT	aromatic compound catabolic process	157	2.9	4.8e-05	0.001
GOTERM_BP_FAT	negative regulation of ERBB signaling pathway	27	0.5	4.9e-05	0.0011
GOTERM_BP_FAT	blastocyst development	35	0.7	5e-05	0.0011
GOTERM_BP_FAT	production of miRNAs involved in gene silencing by miRNA	21	0.4	5.2e-05	0.0011
GOTERM_BP_FAT	positive regulation of telomere maintenance via telomerase	21	0.4	5.2e-05	0.0011
GOTERM_BP_FAT	regulation of DNA replication	54	1	5.3e-05	0.0011
GOTERM_BP_FAT	RNA capping	24	0.4	5.4e-05	0.0012
GOTERM_BP_FAT	7-methylguanosine RNA capping	24	0.4	5.4e-05	0.0012
GOTERM_BP_FAT	spindle checkpoint	24	0.4	5.4e-05	0.0012
GOTERM_BP_FAT	positive regulation of Wnt signaling pathway	67	1.3	6e-05	0.0013
GOTERM_BP_FAT	mitotic spindle assembly	26	0.5	6.1e-05	0.0013
GOTERM_BP_FAT	mitotic G1 DNA damage checkpoint	37	0.7	6.9e-05	0.0015
GOTERM_BP_FAT	mitotic G1/S transition checkpoint	37	0.7	6.9e-05	0.0015
GOTERM_BP_FAT	lamellipodium organization	37	0.7	6.9e-05	0.0015
GOTERM_BP_FAT	translational termination	46	0.9	7e-05	0.0015
GOTERM_BP_FAT	negative regulation of Wnt signaling pathway	83	1.6	7e-05	0.0015
GOTERM_BP_FAT	negative regulation of nucleic acid-templated transcription	390	7.3	7.2e-05	0.0015
GOTERM_BP_FAT	positive regulation of chromatin organization	43	0.8	7.2e-05	0.0015
GOTERM_BP_FAT	positive regulation of viral transcription	25	0.5	7.5e-05	0.0016
GOTERM_BP_FAT	positive regulation of DNA biosynthetic process	31	0.6	8.2e-05	0.0017
GOTERM_BP_FAT	microtubule polymerization	29	0.5	8.3e-05	0.0017
GOTERM_BP_FAT	intracellular steroid hormone receptor signaling pathway	57	1.1	8.4e-05	0.0017
GOTERM_BP_FAT	negative regulation of telomere maintenance	18	0.3	8.4e-05	0.0018
GOTERM_BP_FAT	mitotic spindle assembly checkpoint	18	0.3	8.4e-05	0.0018
GOTERM_BP_FAT	response to ionizing radiation	63	1.2	8.4e-05	0.0018
GOTERM_BP_FAT	chromosome localization	36	0.7	8.7e-05	0.0018
GOTERM_BP_FAT	mitochondrial translational termination	42	0.8	9e-05	0.0019
GOTERM_BP_FAT	protein-DNA complex subunit organization	103	1.9	9.3e-05	0.0019
GOTERM_BP_FAT	intracellular signal transduction	829	15.5	9.4e-05	0.0019
GOTERM_BP_FAT	RNA phosphodiester bond hydrolysis	60	1.1	9.6e-05	0.002
GOTERM_BP_FAT	dsRNA fragmentation	21	0.4	9.7e-05	0.002
GOTERM_BP_FAT	7-methylguanosine mRNA capping	21	0.4	9.7e-05	0.002
GOTERM_BP_FAT	production of small RNA involved in gene silencing by RNA	21	0.4	9.7e-05	0.002
GOTERM_BP_FAT	maturation of 5.8S rRNA	21	0.4	9.7e-05	0.002
GOTERM_BP_FAT	establishment of planar polarity	55	1	9.8e-05	0.002
GOTERM_BP_FAT	establishment of tissue polarity	55	1	9.8e-05	0.002
GOTERM_BP_FAT	negative regulation of RNA biosynthetic process	394	7.4	0.0001	0.002
GOTERM_BP_FAT	positive regulation of proteasomal ubiquitin-dependent protein catabolic process	37	0.7	0.0001	0.002
GOTERM_BP_FAT	negative regulation of epidermal growth factor receptor signaling pathway	26	0.5	0.0001	0.0021
GOTERM_BP_FAT	positive regulation of histone modification	40	0.7	0.0001	0.0021
GOTERM_BP_FAT	negative regulation of cell cycle G1/S phase transition	47	0.9	0.0001	0.0021
GOTERM_BP_FAT	negative regulation of canonical Wnt signaling pathway	70	1.3	0.0001	0.0021
GOTERM_BP_FAT	chordate embryonic development	204	3.8	0.0001	0.0021
GOTERM_BP_FAT	canonical Wnt signaling pathway	110	2.1	0.00011	0.0022
GOTERM_BP_FAT	antigen processing and presentation	91	1.7	0.00011	0.0022
GOTERM_BP_FAT	transcription of nuclear large rRNA transcript from RNA polymerase I promoter	11	0.2	0.00011	0.0023
GOTERM_BP_FAT	modulation by virus of host morphology or physiology	23	0.4	0.00011	0.0023
GOTERM_BP_FAT	termination of RNA polymerase I transcription	20	0.4	0.00012	0.0024
GOTERM_BP_FAT	protein modification by small protein removal	66	1.2	0.00012	0.0024
GOTERM_BP_FAT	positive regulation of cell death	213	4	0.00012	0.0024
GOTERM_BP_FAT	protein K63-linked ubiquitination	25	0.5	0.00013	0.0025
GOTERM_BP_FAT	regulation of mitotic nuclear division	61	1.1	0.00013	0.0025
GOTERM_BP_FAT	positive regulation of transcription elongation from RNA polymerase II promoter	12	0.2	0.00013	0.0026
GOTERM_BP_FAT	regulation of protein localization to chromosome, telomeric region	12	0.2	0.00013	0.0026
GOTERM_BP_FAT	endoplasmic reticulum organization	27	0.5	0.00013	0.0026
GOTERM_BP_FAT	regulation of Wnt signaling pathway	120	2.2	0.00014	0.0027
GOTERM_BP_FAT	regulation of viral transcription	34	0.6	0.00014	0.0027
GOTERM_BP_FAT	regulation of membrane permeability	37	0.7	0.00014	0.0028
GOTERM_BP_FAT	embryo development ending in birth or egg hatching	205	3.8	0.00014	0.0028
GOTERM_BP_FAT	negative regulation of transcription, DNA-templated	373	7	0.00015	0.0029
GOTERM_BP_FAT	regulation of nucleocytoplasmic transport	86	1.6	0.00016	0.0031
GOTERM_BP_FAT	establishment of chromosome localization	35	0.7	0.00016	0.0031
GOTERM_BP_FAT	positive regulation of canonical Wnt signaling pathway	54	1	0.00016	0.0031
GOTERM_BP_FAT	antigen processing and presentation of peptide antigen via MHC class II	45	0.8	0.00016	0.0031
GOTERM_BP_FAT	modulation by symbiont of host cellular process	18	0.3	0.00017	0.0033
GOTERM_BP_FAT	protein localization to chromosome, telomeric region	18	0.3	0.00017	0.0033
GOTERM_BP_FAT	spindle assembly checkpoint	18	0.3	0.00017	0.0033
GOTERM_BP_FAT	viral release from host cell	21	0.4	0.00017	0.0034
GOTERM_BP_FAT	actin cytoskeleton organization	195	3.6	0.00018	0.0034
GOTERM_BP_FAT	positive regulation of cell cycle process	98	1.8	0.00019	0.0036
GOTERM_BP_FAT	regulation of protein localization to nucleus	87	1.6	0.00019	0.0036
GOTERM_BP_FAT	signal transduction in response to DNA damage	53	1	0.00019	0.0037
GOTERM_BP_FAT	ribosomal large subunit biogenesis	34	0.6	0.0002	0.0038
GOTERM_BP_FAT	maturation of LSU-rRNA	17	0.3	0.0002	0.0038
GOTERM_BP_FAT	ERBB signaling pathway	63	1.2	0.00021	0.0041
GOTERM_BP_FAT	regulation of histone methylation	32	0.6	0.00022	0.0041
GOTERM_BP_FAT	protein polymerization	96	1.8	0.00022	0.0043
GOTERM_BP_FAT	Fc receptor signaling pathway	95	1.8	0.00022	0.0043
GOTERM_BP_FAT	regulation of mitochondrial membrane permeability	35	0.7	0.00022	0.0043
GOTERM_BP_FAT	positive regulation of translation	46	0.9	0.00023	0.0043
GOTERM_BP_FAT	positive regulation of DNA-templated transcription, elongation	16	0.3	0.00023	0.0044
GOTERM_BP_FAT	NLS-bearing protein import into nucleus	16	0.3	0.00023	0.0044
GOTERM_BP_FAT	mitotic metaphase plate congression	22	0.4	0.00024	0.0046
GOTERM_BP_FAT	mitochondrial membrane organization	47	0.9	0.00024	0.0046
GOTERM_BP_FAT	generation of precursor metabolites and energy	139	2.6	0.00025	0.0046
GOTERM_BP_FAT	regulation of protein localization	320	6	0.00025	0.0046
GOTERM_BP_FAT	antigen processing and presentation of peptide antigen via MHC class I	43	0.8	0.00025	0.0047
GOTERM_BP_FAT	organic cyclic compound catabolic process	160	3	0.00025	0.0047
GOTERM_BP_FAT	signal transduction involved in DNA integrity checkpoint	33	0.6	0.00025	0.0047
GOTERM_BP_FAT	signal transduction involved in DNA damage checkpoint	33	0.6	0.00025	0.0047
GOTERM_BP_FAT	regulation of microtubule cytoskeleton organization	53	1	0.00025	0.0047
GOTERM_BP_FAT	cytokinesis	53	1	0.00025	0.0047
GOTERM_BP_FAT	modification by symbiont of host morphology or physiology	26	0.5	0.00025	0.0047
GOTERM_BP_FAT	histone H3-K4 methylation	26	0.5	0.00025	0.0047
GOTERM_BP_FAT	regulation of protein binding	73	1.4	0.00025	0.0047
GOTERM_BP_FAT	protein targeting to mitochondrion	61	1.1	0.00026	0.0048
GOTERM_BP_FAT	protein localization to nuclear body	9	0.2	0.00026	0.0049
GOTERM_BP_FAT	protein localization to nucleoplasm	9	0.2	0.00026	0.0049
GOTERM_BP_FAT	protein localization to Cajal body	9	0.2	0.00026	0.0049
GOTERM_BP_FAT	positive regulation of molecular function	583	10.9	0.00026	0.0049
GOTERM_BP_FAT	cytoskeleton-dependent intracellular transport	44	0.8	0.00027	0.0049
GOTERM_BP_FAT	T cell receptor signaling pathway	69	1.3	0.0003	0.0055
GOTERM_BP_FAT	positive regulation of programmed cell death	201	3.8	0.0003	0.0055
GOTERM_BP_FAT	establishment of spindle localization	21	0.4	0.0003	0.0055
GOTERM_BP_FAT	regulation of chromatin binding	14	0.3	0.00031	0.0056
GOTERM_BP_FAT	antigen processing and presentation of exogenous peptide antigen via MHC class I, TAP-dependent	32	0.6	0.00031	0.0057
GOTERM_BP_FAT	establishment of vesicle localization	94	1.8	0.00031	0.0057
GOTERM_BP_FAT	establishment of cell polarity	43	0.8	0.00033	0.006
GOTERM_BP_FAT	regulation of establishment of protein localization to chromosome	10	0.2	0.00034	0.0062
GOTERM_BP_FAT	glucocorticoid receptor signaling pathway	13	0.2	0.00034	0.0062
GOTERM_BP_FAT	pore complex assembly	13	0.2	0.00034	0.0062
GOTERM_BP_FAT	positive regulation of apoptotic process	199	3.7	0.00034	0.0062
GOTERM_BP_FAT	positive regulation of multi-organism process	66	1.2	0.00035	0.0063
GOTERM_BP_FAT	signal transduction involved in cell cycle checkpoint	33	0.6	0.00035	0.0064
GOTERM_BP_FAT	positive regulation of cell projection organization	114	2.1	0.00035	0.0064
GOTERM_BP_FAT	actin filament organization	124	2.3	0.00035	0.0064
GOTERM_BP_FAT	nuclear pore organization	12	0.2	0.00036	0.0065
GOTERM_BP_FAT	regulation of cell cycle checkpoint	20	0.4	0.00037	0.0066
GOTERM_BP_FAT	mitotic cytokinesis	20	0.4	0.00037	0.0066
GOTERM_BP_FAT	regulation of viral life cycle	72	1.3	0.00037	0.0067
GOTERM_BP_FAT	antigen processing and presentation of peptide or polysaccharide antigen via MHC class II	45	0.8	0.00037	0.0067
GOTERM_BP_FAT	metaphase plate congression	26	0.5	0.00039	0.007
GOTERM_BP_FAT	maturation of SSU-rRNA	26	0.5	0.00039	0.007
GOTERM_BP_FAT	energy derivation by oxidation of organic compounds	103	1.9	0.0004	0.0072
GOTERM_BP_FAT	regulation of catalytic activity	733	13.7	0.00041	0.0073
GOTERM_BP_FAT	regulation of viral process	100	1.9	0.00041	0.0073
GOTERM_BP_FAT	negative regulation of dephosphorylation	38	0.7	0.00041	0.0074
GOTERM_BP_FAT	cell cycle arrest	91	1.7	0.00044	0.0079
GOTERM_BP_FAT	positive regulation of catalytic activity	497	9.3	0.00045	0.008
GOTERM_BP_FAT	Golgi to vacuole transport	19	0.4	0.00046	0.0081
GOTERM_BP_FAT	multivesicular body assembly	19	0.4	0.00046	0.0081
GOTERM_BP_FAT	transcription elongation from RNA polymerase I promoter	19	0.4	0.00046	0.0081
GOTERM_BP_FAT	modulation by virus of host process	16	0.3	0.00046	0.0081
GOTERM_BP_FAT	histone H4-K16 acetylation	16	0.3	0.00046	0.0081
GOTERM_BP_FAT	protein localization to vacuole	27	0.5	0.00046	0.0082
GOTERM_BP_FAT	negative regulation of signal transduction	356	6.7	0.00047	0.0083
GOTERM_BP_FAT	regulation of cytoskeleton organization	151	2.8	0.00048	0.0083
GOTERM_BP_FAT	nuclear-transcribed mRNA poly(A) tail shortening	21	0.4	0.00049	0.0087
GOTERM_BP_FAT	DNA damage response, detection of DNA damage	21	0.4	0.00049	0.0087
GOTERM_BP_FAT	cytoskeleton-dependent cytokinesis	23	0.4	0.0005	0.0088
GOTERM_BP_FAT	regulation of symbiosis, encompassing mutualism through parasitism	107	2	0.00052	0.009
GOTERM_BP_FAT	regulation of establishment of protein localization to mitochondrion	55	1	0.00054	0.0094
GOTERM_BP_FAT	positive regulation of chromosome segregation	15	0.3	0.00055	0.0096
GOTERM_BP_FAT	organelle transport along microtubule	31	0.6	0.00056	0.0097
GOTERM_BP_FAT	microtubule polymerization or depolymerization	38	0.7	0.00056	0.0097
GOTERM_BP_FAT	mRNA splice site selection	18	0.3	0.00056	0.0098
GOTERM_BP_FAT	nucleotide-excision repair, preincision complex assembly	18	0.3	0.00056	0.0098
GOTERM_BP_FAT	lamellipodium assembly	26	0.5	0.00058	0.01
GOTERM_BP_FAT	recombinational repair	39	0.7	0.0006	0.01
GOTERM_BP_FAT	regulation of microtubule-based process	60	1.1	0.0006	0.01
GOTERM_BP_FAT	innate immune response-activating signal transduction	93	1.7	0.0006	0.01
GOTERM_BP_FAT	negative regulation of mitotic nuclear division	24	0.4	0.00062	0.011
GOTERM_BP_FAT	endosome to lysosome transport	24	0.4	0.00062	0.011
GOTERM_BP_FAT	post-Golgi vesicle-mediated transport	32	0.6	0.00062	0.011
GOTERM_BP_FAT	positive regulation of cell cycle phase transition	32	0.6	0.00062	0.011
GOTERM_BP_FAT	histone ubiquitination	22	0.4	0.00063	0.011
GOTERM_BP_FAT	regulation of ERBB signaling pathway	40	0.7	0.00064	0.011
GOTERM_BP_FAT	ephrin receptor signaling pathway	40	0.7	0.00064	0.011
GOTERM_BP_FAT	protein localization to plasma membrane	81	1.5	0.00065	0.011
GOTERM_BP_FAT	establishment of protein localization to membrane	133	2.5	0.00067	0.011
GOTERM_BP_FAT	mitochondrial respiratory chain complex assembly	41	0.8	0.00067	0.011
GOTERM_BP_FAT	negative regulation of RNA splicing	17	0.3	0.00069	0.012
GOTERM_BP_FAT	establishment of spindle orientation	17	0.3	0.00069	0.012
GOTERM_BP_FAT	mitochondrial genome maintenance	17	0.3	0.00069	0.012
GOTERM_BP_FAT	protein localization to chromosome	30	0.6	0.0007	0.012
GOTERM_BP_FAT	modification of morphology or physiology of other organism involved in symbiotic interaction	42	0.8	0.00071	0.012
GOTERM_BP_FAT	negative regulation of phosphorus metabolic process	188	3.5	0.00072	0.012
GOTERM_BP_FAT	negative regulation of phosphate metabolic process	188	3.5	0.00072	0.012
GOTERM_BP_FAT	establishment of protein localization to plasma membrane	59	1.1	0.00072	0.012
GOTERM_BP_FAT	positive regulation of establishment of protein localization to mitochondrion	50	0.9	0.00075	0.013
GOTERM_BP_FAT	mitochondrial DNA metabolic process	13	0.2	0.00076	0.013
GOTERM_BP_FAT	nuclear-transcribed mRNA catabolic process, exonucleolytic	19	0.4	0.00077	0.013
GOTERM_BP_FAT	multivesicular body organization	19	0.4	0.00077	0.013
GOTERM_BP_FAT	DNA strand elongation	19	0.4	0.00077	0.013
GOTERM_BP_FAT	protein targeting to vacuole	19	0.4	0.00077	0.013
GOTERM_BP_FAT	ribonucleoside biosynthetic process	51	1	0.00077	0.013
GOTERM_BP_FAT	signal transduction involved in mitotic DNA damage checkpoint	31	0.6	0.00078	0.013
GOTERM_BP_FAT	signal transduction involved in mitotic DNA integrity checkpoint	31	0.6	0.00078	0.013
GOTERM_BP_FAT	signal transduction involved in mitotic cell cycle checkpoint	31	0.6	0.00078	0.013
GOTERM_BP_FAT	intracellular signal transduction involved in G1 DNA damage checkpoint	31	0.6	0.00078	0.013
GOTERM_BP_FAT	signal transduction involved in mitotic G1 DNA damage checkpoint	31	0.6	0.00078	0.013
GOTERM_BP_FAT	mitochondrial translational elongation	39	0.7	0.00079	0.013
GOTERM_BP_FAT	tRNA processing	52	1	0.00079	0.013
GOTERM_BP_FAT	negative regulation of histone modification	21	0.4	0.00079	0.013
GOTERM_BP_FAT	nucleotide-excision repair, DNA incision, 5'-to lesion	21	0.4	0.00079	0.013
GOTERM_BP_FAT	vesicle localization	96	1.8	0.00079	0.013
GOTERM_BP_FAT	positive regulation of protein localization to nucleus	54	1	0.00082	0.014
GOTERM_BP_FAT	regulation of intracellular protein transport	134	2.5	0.00084	0.014
GOTERM_BP_FAT	positive regulation of protein localization to Cajal body	8	0.1	0.00084	0.014
GOTERM_BP_FAT	regulation of protein localization to Cajal body	8	0.1	0.00084	0.014
GOTERM_BP_FAT	establishment of mitotic spindle localization	16	0.3	0.00085	0.014
GOTERM_BP_FAT	antigen processing and presentation of exogenous peptide antigen via MHC class I	32	0.6	0.00086	0.014
GOTERM_BP_FAT	cellular response to dsRNA	26	0.5	0.00086	0.014
GOTERM_BP_FAT	telomerase RNA localization to Cajal body	12	0.2	0.00086	0.014
GOTERM_BP_FAT	histone H4-K5 acetylation	12	0.2	0.00086	0.014
GOTERM_BP_FAT	histone H4-K8 acetylation	12	0.2	0.00086	0.014
GOTERM_BP_FAT	telomerase RNA localization	12	0.2	0.00086	0.014
GOTERM_BP_FAT	RNA localization to Cajal body	12	0.2	0.00086	0.014
GOTERM_BP_FAT	negative regulation of telomere maintenance via telomere lengthening	12	0.2	0.00086	0.014
GOTERM_BP_FAT	ER-associated ubiquitin-dependent protein catabolic process	36	0.7	0.00087	0.014
GOTERM_BP_FAT	positive regulation of mitotic cell cycle phase transition	29	0.5	0.00088	0.014
GOTERM_BP_FAT	histone H3 acetylation	29	0.5	0.00088	0.014
GOTERM_BP_FAT	regulation of response to stress	412	7.7	0.00088	0.014
GOTERM_BP_FAT	intracellular receptor signaling pathway	98	1.8	0.00089	0.015
GOTERM_BP_FAT	small GTPase mediated signal transduction	182	3.4	0.00091	0.015
GOTERM_BP_FAT	negative regulation of transcription from RNA polymerase II promoter	250	4.7	0.00092	0.015
GOTERM_BP_FAT	regulation of centrosome cycle	24	0.4	0.00093	0.015
GOTERM_BP_FAT	regulation of nuclear division	66	1.2	0.00093	0.015
GOTERM_BP_FAT	negative regulation of protein phosphorylation	140	2.6	0.00094	0.015
GOTERM_BP_FAT	establishment of nucleus localization	11	0.2	0.00096	0.015
GOTERM_BP_FAT	histone mRNA catabolic process	11	0.2	0.00096	0.015
GOTERM_BP_FAT	nucleoside monophosphate biosynthetic process	43	0.8	0.00096	0.015
GOTERM_BP_FAT	exonucleolytic nuclear-transcribed mRNA catabolic process involved in deadenylation-dependent decay	18	0.3	0.00096	0.015
GOTERM_BP_FAT	regulation of signal transduction	836	15.6	0.00098	0.016
GOTERM_BP_FAT	protein transmembrane transport	30	0.6	0.00098	0.016
GOTERM_BP_FAT	spindle localization	22	0.4	0.00098	0.016
GOTERM_BP_FAT	double-strand break repair via homologous recombination	38	0.7	0.00098	0.016
GOTERM_BP_FAT	cytoplasmic translation	27	0.5	0.00098	0.016
GOTERM_BP_FAT	negative regulation of response to DNA damage stimulus	27	0.5	0.00098	0.016
GOTERM_BP_FAT	intracellular protein transmembrane transport	27	0.5	0.00098	0.016
GOTERM_BP_FAT	regulation of transcription of nuclear large rRNA transcript from RNA polymerase I promoter	9	0.2	0.00099	0.016
GOTERM_BP_FAT	regulation of establishment of protein localization to telomere	9	0.2	0.00099	0.016
GOTERM_BP_FAT	nuclear migration	9	0.2	0.00099	0.016
GOTERM_BP_FAT	IRES-dependent translational initiation	10	0.2	0.001	0.016
GOTERM_BP_FAT	spliceosomal tri-snRNP complex assembly	10	0.2	0.001	0.016
GOTERM_BP_FAT	positive regulation of protein localization to chromosome, telomeric region	10	0.2	0.001	0.016
GOTERM_BP_FAT	nucleoside biosynthetic process	54	1	0.001	0.016
GOTERM_BP_FAT	non-recombinational repair	35	0.7	0.0011	0.017
GOTERM_BP_FAT	activation of innate immune response	94	1.8	0.0011	0.017
GOTERM_BP_FAT	cofactor metabolic process	137	2.6	0.0011	0.018
GOTERM_BP_FAT	regulation of canonical Wnt signaling pathway	91	1.7	0.0011	0.018
GOTERM_BP_FAT	ATP synthesis coupled electron transport	41	0.8	0.0011	0.018
GOTERM_BP_FAT	cellular response to starvation	49	0.9	0.0012	0.018
GOTERM_BP_FAT	positive regulation of cellular amide metabolic process	50	0.9	0.0012	0.019
GOTERM_BP_FAT	positive regulation of mitotic cell cycle	52	1	0.0012	0.019
GOTERM_BP_FAT	positive regulation of mRNA metabolic process	26	0.5	0.0012	0.019
GOTERM_BP_FAT	establishment of protein localization to vacuole	19	0.4	0.0013	0.02
GOTERM_BP_FAT	positive regulation of viral genome replication	19	0.4	0.0013	0.02
GOTERM_BP_FAT	IRE1-mediated unfolded protein response	33	0.6	0.0013	0.02
GOTERM_BP_FAT	nucleotide-excision repair, preincision complex stabilization	14	0.3	0.0013	0.02
GOTERM_BP_FAT	regulation of mRNA 3'-end processing	14	0.3	0.0013	0.02
GOTERM_BP_FAT	negative regulation of mRNA splicing, via spliceosome	14	0.3	0.0013	0.02
GOTERM_BP_FAT	response to radiation	147	2.7	0.0013	0.02
GOTERM_BP_FAT	regulation of epidermal growth factor receptor signaling pathway	38	0.7	0.0013	0.02
GOTERM_BP_FAT	negative regulation of phosphorylation	150	2.8	0.0013	0.021
GOTERM_BP_FAT	signal transduction by p53 class mediator	66	1.2	0.0013	0.021
GOTERM_BP_FAT	autophagosome assembly	30	0.6	0.0013	0.021
GOTERM_BP_FAT	DNA damage response, signal transduction by p53 class mediator resulting in cell cycle arrest	30	0.6	0.0013	0.021
GOTERM_BP_FAT	negative regulation of chromatin organization	24	0.4	0.0014	0.021
GOTERM_BP_FAT	regulation of phosphatase activity	47	0.9	0.0014	0.021
GOTERM_BP_FAT	positive regulation of transcription from RNA polymerase II promoter	337	6.3	0.0014	0.021
GOTERM_BP_FAT	positive regulation of protein complex assembly	85	1.6	0.0014	0.022
GOTERM_BP_FAT	nucleotide-excision repair, DNA incision	22	0.4	0.0015	0.023
GOTERM_BP_FAT	DNA strand elongation involved in DNA replication	16	0.3	0.0015	0.023
GOTERM_BP_FAT	activation of GTPase activity	36	0.7	0.0015	0.023
GOTERM_BP_FAT	cytoplasmic mRNA processing body assembly	13	0.2	0.0015	0.023
GOTERM_BP_FAT	corticosteroid receptor signaling pathway	13	0.2	0.0015	0.023
GOTERM_BP_FAT	positive regulation of mitochondrial membrane permeability	28	0.5	0.0015	0.024
GOTERM_BP_FAT	glycosyl compound biosynthetic process	54	1	0.0015	0.024
GOTERM_BP_FAT	cellular response to insulin stimulus	73	1.4	0.0016	0.024
GOTERM_BP_FAT	RNA phosphodiester bond hydrolysis, exonucleolytic	20	0.4	0.0016	0.024
GOTERM_BP_FAT	regulation of protein deacetylation	20	0.4	0.0016	0.024
GOTERM_BP_FAT	negative regulation of TOR signaling	20	0.4	0.0016	0.024
GOTERM_BP_FAT	protein localization to Golgi apparatus	20	0.4	0.0016	0.024
GOTERM_BP_FAT	cellular response to UV	32	0.6	0.0016	0.024
GOTERM_BP_FAT	regulation of intrinsic apoptotic signaling pathway	61	1.1	0.0016	0.024
GOTERM_BP_FAT	oxidative phosphorylation	46	0.9	0.0017	0.025
GOTERM_BP_FAT	regulation of mitochondrial membrane permeability involved in apoptotic process	29	0.5	0.0017	0.025
GOTERM_BP_FAT	mitochondrial transmembrane transport	33	0.6	0.0017	0.025
GOTERM_BP_FAT	regulation of protein dephosphorylation	33	0.6	0.0017	0.025
GOTERM_BP_FAT	cellular amino acid metabolic process	93	1.7	0.0017	0.025
GOTERM_BP_FAT	regulation of telomerase activity	23	0.4	0.0017	0.026
GOTERM_BP_FAT	protein autoubiquitination	26	0.5	0.0018	0.026
GOTERM_BP_FAT	regulation of cellular amine metabolic process	34	0.6	0.0018	0.027
GOTERM_BP_FAT	mitochondrial ATP synthesis coupled electron transport	40	0.7	0.0018	0.027
GOTERM_BP_FAT	epidermal growth factor receptor signaling pathway	50	0.9	0.0018	0.027
GOTERM_BP_FAT	barbed-end actin filament capping	12	0.2	0.0018	0.027
GOTERM_BP_FAT	positive regulation of lamellipodium organization	15	0.3	0.0019	0.028
GOTERM_BP_FAT	positive regulation of neuron projection development	86	1.6	0.0019	0.028
GOTERM_BP_FAT	organelle disassembly	35	0.7	0.0019	0.028
GOTERM_BP_FAT	protein localization to cell periphery	85	1.6	0.0019	0.028
GOTERM_BP_FAT	mitochondrial outer membrane permeabilization involved in programmed cell death	27	0.5	0.0019	0.029
GOTERM_BP_FAT	postreplication repair	27	0.5	0.0019	0.029
GOTERM_BP_FAT	positive regulation of mitochondrial membrane permeability involved in apoptotic process	27	0.5	0.0019	0.029
GOTERM_BP_FAT	protein K48-linked ubiquitination	24	0.4	0.002	0.029
GOTERM_BP_FAT	regulation of protein localization to plasma membrane	31	0.6	0.002	0.029
GOTERM_BP_FAT	peptidyl-threonine phosphorylation	36	0.7	0.002	0.029
GOTERM_BP_FAT	DNA damage response, signal transduction by p53 class mediator	45	0.8	0.0021	0.03
GOTERM_BP_FAT	double-strand break repair via nonhomologous end joining	32	0.6	0.0021	0.031
GOTERM_BP_FAT	respiratory electron transport chain	46	0.9	0.0021	0.031
GOTERM_BP_FAT	negative regulation of ERK1 and ERK2 cascade	28	0.5	0.0021	0.031
GOTERM_BP_FAT	positive regulation of telomerase RNA localization to Cajal body	11	0.2	0.0021	0.031
GOTERM_BP_FAT	regulation of telomerase RNA localization to Cajal body	11	0.2	0.0021	0.031
GOTERM_BP_FAT	mitochondrial RNA processing	11	0.2	0.0021	0.031
GOTERM_BP_FAT	RNA interference	11	0.2	0.0021	0.031
GOTERM_BP_FAT	regulation of DNA damage checkpoint	11	0.2	0.0021	0.031
GOTERM_BP_FAT	regulation of cell death	474	8.9	0.0022	0.032
GOTERM_BP_FAT	negative regulation of cell communication	377	7.1	0.0022	0.032
GOTERM_BP_FAT	actin filament bundle assembly	52	1	0.0023	0.033
GOTERM_BP_FAT	negative regulation of signaling	378	7.1	0.0023	0.033
GOTERM_BP_FAT	establishment of protein localization to chromosome	14	0.3	0.0023	0.033
GOTERM_BP_FAT	nucleus localization	14	0.3	0.0023	0.033
GOTERM_BP_FAT	regulation of plasma membrane organization	34	0.6	0.0023	0.034
GOTERM_BP_FAT	maturation of SSU-rRNA from tricistronic rRNA transcript (SSU-rRNA, 5.8S rRNA, LSU-rRNA)	20	0.4	0.0024	0.034
GOTERM_BP_FAT	autophagosome organization	30	0.6	0.0025	0.035
GOTERM_BP_FAT	regulation of transcription from RNA polymerase I promoter	16	0.3	0.0025	0.036
GOTERM_BP_FAT	protein K11-linked ubiquitination	16	0.3	0.0025	0.036
GOTERM_BP_FAT	ER-nucleus signaling pathway	23	0.4	0.0025	0.036
GOTERM_BP_FAT	regulation of viral release from host cell	18	0.3	0.0025	0.036
GOTERM_BP_FAT	protein localization to membrane	167	3.1	0.0025	0.036
GOTERM_BP_FAT	regulation of protein localization to cell periphery	31	0.6	0.0026	0.037
GOTERM_BP_FAT	mitotic DNA replication	7	0.1	0.0026	0.038
GOTERM_BP_FAT	IRES-dependent viral translational initiation	7	0.1	0.0026	0.038
GOTERM_BP_FAT	positive regulation of mitophagy	7	0.1	0.0026	0.038
GOTERM_BP_FAT	transcription-dependent tethering of RNA polymerase II gene DNA at nuclear periphery	7	0.1	0.0026	0.038
GOTERM_BP_FAT	peptidyl-threonine modification	37	0.7	0.0026	0.038
GOTERM_BP_FAT	negative regulation of intracellular signal transduction	156	2.9	0.0027	0.038
GOTERM_BP_FAT	protein export from nucleus	27	0.5	0.0027	0.038
GOTERM_BP_FAT	negative regulation of nuclear division	27	0.5	0.0027	0.038
GOTERM_BP_FAT	response to insulin	90	1.7	0.0027	0.038
GOTERM_BP_FAT	regulation of cell projection assembly	64	1.2	0.0027	0.038
GOTERM_BP_FAT	nuclear pore complex assembly	9	0.2	0.0027	0.039
GOTERM_BP_FAT	actin filament bundle organization	53	1	0.0028	0.039
GOTERM_BP_FAT	stem cell population maintenance	56	1	0.0028	0.039
GOTERM_BP_FAT	maintenance of cell number	57	1.1	0.0028	0.039
GOTERM_BP_FAT	protein deubiquitination	55	1	0.0028	0.039
GOTERM_BP_FAT	protein-DNA complex assembly	87	1.6	0.0028	0.039
GOTERM_BP_FAT	endosomal vesicle fusion	8	0.1	0.0029	0.04
GOTERM_BP_FAT	positive regulation of establishment of protein localization to telomere	8	0.1	0.0029	0.04
GOTERM_BP_FAT	primary miRNA processing	8	0.1	0.0029	0.04
GOTERM_BP_FAT	transferrin transport	19	0.4	0.003	0.042
GOTERM_BP_FAT	vacuole fusion	19	0.4	0.003	0.042
GOTERM_BP_FAT	DNA alkylation	25	0.5	0.0031	0.043
GOTERM_BP_FAT	DNA methylation	25	0.5	0.0031	0.043
GOTERM_BP_FAT	transmembrane receptor protein tyrosine kinase signaling pathway	215	4	0.0031	0.043
GOTERM_BP_FAT	intracellular estrogen receptor signaling pathway	22	0.4	0.0031	0.044
GOTERM_BP_FAT	blastocyst formation	17	0.3	0.0031	0.044
GOTERM_BP_FAT	regulation of cell cycle arrest	45	0.8	0.0032	0.044
GOTERM_BP_FAT	electron transport chain	46	0.9	0.0032	0.044
GOTERM_BP_FAT	somatic diversification of immune receptors	30	0.6	0.0033	0.045
GOTERM_BP_FAT	mitochondrial outer membrane permeabilization	26	0.5	0.0034	0.046
GOTERM_BP_FAT	ribonucleoside monophosphate biosynthetic process	38	0.7	0.0035	0.048
GOTERM_BP_FAT	regulation of translational fidelity	12	0.2	0.0035	0.048
GOTERM_BP_FAT	regulation of early endosome to late endosome transport	12	0.2	0.0035	0.048
GOTERM_BP_FAT	mismatch repair	20	0.4	0.0035	0.048
GOTERM_BP_FAT	regulation of vacuole organization	23	0.4	0.0035	0.048
GOTERM_BP_FAT	positive regulation of protein modification process	363	6.8	0.0036	0.049
GOTERM_BP_FAT	tRNA modification	32	0.6	0.0036	0.049

## Sheet: Cluster 2_M
Category	Term	Count	%	P-Value	Benjamini
GOTERM_BP_FAT	ion transport	957	7.5	2.6e-32	3.4e-28
GOTERM_BP_FAT	transmembrane transport	863	6.8	6.6e-28	4.3e-24
GOTERM_BP_FAT	ion transmembrane transport	642	5	3.4e-24	1.5e-20
GOTERM_BP_FAT	metal ion transport	550	4.3	8.8e-23	2.9e-19
GOTERM_BP_FAT	cation transport	640	5	1.3e-21	2.8e-18
GOTERM_BP_FAT	cellular component morphogenesis	838	6.6	1.3e-21	3.3e-18
GOTERM_BP_FAT	cell morphogenesis	785	6.2	6.2e-20	1.2e-16
GOTERM_BP_FAT	lipid metabolic process	832	6.5	4.5e-19	7.4e-16
GOTERM_BP_FAT	cation transmembrane transport	472	3.7	7.2e-19	1e-15
GOTERM_BP_FAT	inorganic ion transmembrane transport	480	3.8	1.9e-17	2.3e-14
GOTERM_BP_FAT	anatomical structure formation involved in morphogenesis	724	5.7	1.8e-17	2.3e-14
GOTERM_BP_FAT	movement of cell or subcellular component	1080	8.5	1.6e-16	1.1e-13
GOTERM_BP_FAT	regulation of ion transport	378	3	5.7e-17	1.2e-13
GOTERM_BP_FAT	cell projection morphogenesis	519	4.1	2.2e-16	2.1e-13
GOTERM_BP_FAT	cell projection organization	804	6.3	3.7e-16	2.9e-13
GOTERM_BP_FAT	cellular lipid metabolic process	658	5.2	5.7e-16	4.5e-13
GOTERM_BP_FAT	anion transport	324	2.5	8e-16	5.9e-13
GOTERM_BP_FAT	cell part morphogenesis	526	4.1	3.4e-15	2.4e-12
GOTERM_BP_FAT	cell adhesion	1018	8	6.8e-15	4.6e-12
GOTERM_BP_FAT	biological adhesion	1020	8	1.2e-14	7.5e-12
GOTERM_BP_FAT	regulation of membrane potential	255	2	2e-14	1.2e-11
GOTERM_BP_FAT	inorganic cation transmembrane transport	416	3.3	7.1e-14	4.2e-11
GOTERM_BP_FAT	sodium ion transport	153	1.2	1.2e-13	7e-11
GOTERM_BP_FAT	regulation of ion transmembrane transport	272	2.1	1.3e-13	7.3e-11
GOTERM_BP_FAT	organic anion transport	235	1.8	1.5e-13	7.8e-11
GOTERM_BP_FAT	secretion	675	5.3	5.5e-13	2.8e-10
GOTERM_BP_FAT	cardiovascular system development	589	4.6	6.1e-13	2.9e-10
GOTERM_BP_FAT	circulatory system development	589	4.6	6.1e-13	2.9e-10
GOTERM_BP_FAT	cell development	1152	9.1	8.6e-13	4e-10
GOTERM_BP_FAT	locomotion	912	7.2	1.3e-12	5.6e-10
GOTERM_BP_FAT	cellular component assembly involved in morphogenesis	210	1.7	1.3e-12	5.6e-10
GOTERM_BP_FAT	organonitrogen compound catabolic process	251	2	1.4e-12	6e-10
GOTERM_BP_FAT	regulation of transmembrane transport	277	2.2	1.7e-12	7.1e-10
GOTERM_BP_FAT	blood circulation	334	2.6	6e-12	2.3e-09
GOTERM_BP_FAT	extracellular structure organization	233	1.8	5.9e-12	2.3e-09
GOTERM_BP_FAT	chemical homeostasis	642	5	7.1e-12	2.6e-09
GOTERM_BP_FAT	circulatory system process	336	2.6	7.4e-12	2.7e-09
GOTERM_BP_FAT	extracellular matrix organization	232	1.8	8e-12	2.8e-09
GOTERM_BP_FAT	cellular potassium ion transport	138	1.1	1.3e-11	4.5e-09
GOTERM_BP_FAT	potassium ion transmembrane transport	138	1.1	1.3e-11	4.5e-09
GOTERM_BP_FAT	regulation of signaling	1731	13.6	3e-11	1e-08
GOTERM_BP_FAT	potassium ion transport	156	1.2	3.1e-11	1e-08
GOTERM_BP_FAT	cell-substrate adhesion	213	1.7	4.5e-11	1.4e-08
GOTERM_BP_FAT	divalent inorganic cation transport	281	2.2	5.3e-11	1.7e-08
GOTERM_BP_FAT	organic acid metabolic process	557	4.4	9.4e-11	2.7e-08
GOTERM_BP_FAT	regulation of transport	1045	8.2	9e-11	2.7e-08
GOTERM_BP_FAT	ion homeostasis	440	3.5	9.3e-11	2.8e-08
GOTERM_BP_FAT	regulation of cell communication	1700	13.4	9.9e-11	2.8e-08
GOTERM_BP_FAT	divalent metal ion transport	278	2.2	1.2e-10	3.4e-08
GOTERM_BP_FAT	monovalent inorganic cation transport	316	2.5	3.2e-10	8.6e-08
GOTERM_BP_FAT	lipid modification	184	1.4	3.3e-10	8.9e-08
GOTERM_BP_FAT	single-organism catabolic process	515	4	3.4e-10	8.9e-08
GOTERM_BP_FAT	secretion by cell	586	4.6	5e-10	1.3e-07
GOTERM_BP_FAT	localization of cell	786	6.2	6e-10	1.5e-07
GOTERM_BP_FAT	cell motility	786	6.2	6e-10	1.5e-07
GOTERM_BP_FAT	carboxylic acid transport	191	1.5	6.5e-10	1.6e-07
GOTERM_BP_FAT	angiogenesis	272	2.1	8.9e-10	2.1e-07
GOTERM_BP_FAT	calcium ion transmembrane transport	184	1.4	8.9e-10	2.1e-07
GOTERM_BP_FAT	sodium ion transmembrane transport	103	0.8	8.8e-10	2.1e-07
GOTERM_BP_FAT	regulation of system process	324	2.5	1.3e-09	2.9e-07
GOTERM_BP_FAT	nervous system development	1237	9.7	1.5e-09	3.4e-07
GOTERM_BP_FAT	inorganic ion homeostasis	411	3.2	1.7e-09	3.7e-07
GOTERM_BP_FAT	muscle contraction	223	1.8	1.7e-09	3.7e-07
GOTERM_BP_FAT	single organism cell adhesion	479	3.8	1.7e-09	3.8e-07
GOTERM_BP_FAT	regulation of cellular component movement	491	3.9	2.5e-09	5.2e-07
GOTERM_BP_FAT	positive regulation of multicellular organismal process	836	6.6	3.4e-09	7e-07
GOTERM_BP_FAT	cilium morphogenesis	172	1.4	3.7e-09	7.4e-07
GOTERM_BP_FAT	cilium assembly	147	1.2	4.2e-09	8.5e-07
GOTERM_BP_FAT	cell surface receptor signaling pathway	1499	11.8	4.4e-09	8.7e-07
GOTERM_BP_FAT	neuron development	580	4.6	4.6e-09	9e-07
GOTERM_BP_FAT	cation homeostasis	400	3.1	5.9e-09	1.1e-06
GOTERM_BP_FAT	regulation of GTPase activity	427	3.4	5.9e-09	1.1e-06
GOTERM_BP_FAT	muscle system process	264	2.1	7.1e-09	1.3e-06
GOTERM_BP_FAT	calcium ion transport	243	1.9	7.6e-09	1.4e-06
GOTERM_BP_FAT	cilium organization	159	1.3	7.9e-09	1.4e-06
GOTERM_BP_FAT	cell morphogenesis involved in differentiation	461	3.6	8e-09	1.4e-06
GOTERM_BP_FAT	regulation of cell migration	423	3.3	7.8e-09	1.4e-06
GOTERM_BP_FAT	blood vessel morphogenesis	313	2.5	9e-09	1.6e-06
GOTERM_BP_FAT	single organismal cell-cell adhesion	445	3.5	9.4e-09	1.6e-06
GOTERM_BP_FAT	anion transmembrane transport	140	1.1	9.3e-09	1.6e-06
GOTERM_BP_FAT	monocarboxylic acid metabolic process	351	2.8	1.3e-08	2.1e-06
GOTERM_BP_FAT	multicellular organismal signaling	110	0.9	1.3e-08	2.2e-06
GOTERM_BP_FAT	oxoacid metabolic process	503	4	1.5e-08	2.4e-06
GOTERM_BP_FAT	chemical synaptic transmission	376	3	1.6e-08	2.5e-06
GOTERM_BP_FAT	trans-synaptic signaling	376	3	1.6e-08	2.5e-06
GOTERM_BP_FAT	anterograde trans-synaptic signaling	376	3	1.6e-08	2.5e-06
GOTERM_BP_FAT	synaptic signaling	376	3	1.6e-08	2.5e-06
GOTERM_BP_FAT	vasculature development	379	3	1.9e-08	3e-06
GOTERM_BP_FAT	regulation of blood circulation	201	1.6	2.2e-08	3.5e-06
GOTERM_BP_FAT	positive regulation of GTPase activity	392	3.1	2.4e-08	3.6e-06
GOTERM_BP_FAT	regulation of secretion	419	3.3	2.9e-08	4.4e-06
GOTERM_BP_FAT	neuron projection morphogenesis	340	2.7	3.3e-08	5e-06
GOTERM_BP_FAT	carbohydrate derivative catabolic process	130	1	3.3e-08	5e-06
GOTERM_BP_FAT	carboxylic acid metabolic process	498	3.9	3.6e-08	5.2e-06
GOTERM_BP_FAT	regulation of cell motility	448	3.5	3.7e-08	5.3e-06
GOTERM_BP_FAT	action potential	99	0.8	3.6e-08	5.3e-06
GOTERM_BP_FAT	lipid biosynthetic process	385	3	4.5e-08	6.4e-06
GOTERM_BP_FAT	blood vessel development	358	2.8	4.5e-08	6.4e-06
GOTERM_BP_FAT	neurogenesis	836	6.6	5.4e-08	7.5e-06
GOTERM_BP_FAT	generation of neurons	787	6.2	5.9e-08	8.2e-06
GOTERM_BP_FAT	regulation of locomotion	464	3.6	7.7e-08	1e-05
GOTERM_BP_FAT	neuron differentiation	715	5.6	7.8e-08	1.1e-05
GOTERM_BP_FAT	neuron projection development	491	3.9	8e-08	1.1e-05
GOTERM_BP_FAT	regulation of cell adhesion	394	3.1	9.3e-08	1.2e-05
GOTERM_BP_FAT	metal ion homeostasis	346	2.7	1.1e-07	1.4e-05
GOTERM_BP_FAT	detection of abiotic stimulus	91	0.7	1.1e-07	1.4e-05
GOTERM_BP_FAT	cell projection assembly	267	2.1	1.2e-07	1.6e-05
GOTERM_BP_FAT	lipid transport	205	1.6	1.6e-07	2e-05
GOTERM_BP_FAT	inorganic anion transport	108	0.8	1.6e-07	2.1e-05
GOTERM_BP_FAT	organic acid catabolic process	152	1.2	1.7e-07	2.2e-05
GOTERM_BP_FAT	cell-matrix adhesion	134	1.1	1.8e-07	2.2e-05
GOTERM_BP_FAT	inositol lipid-mediated signaling	131	1	1.8e-07	2.2e-05
GOTERM_BP_FAT	cell morphogenesis involved in neuron differentiation	310	2.4	1.8e-07	2.2e-05
GOTERM_BP_FAT	peptidyl-tyrosine phosphorylation	226	1.8	2e-07	2.4e-05
GOTERM_BP_FAT	peptidyl-tyrosine modification	227	1.8	2.2e-07	2.6e-05
GOTERM_BP_FAT	regulation of signal transduction	1513	11.9	2.6e-07	3e-05
GOTERM_BP_FAT	cell migration	688	5.4	3.1e-07	3.6e-05
GOTERM_BP_FAT	cellular chemical homeostasis	430	3.4	3.2e-07	3.7e-05
GOTERM_BP_FAT	detection of external stimulus	88	0.7	3.5e-07	4e-05
GOTERM_BP_FAT	neuron projection guidance	152	1.2	4.1e-07	4.7e-05
GOTERM_BP_FAT	phosphatidylinositol-mediated signaling	128	1	4.7e-07	5.3e-05
GOTERM_BP_FAT	regulation of hydrolase activity	769	6	5.2e-07	5.8e-05
GOTERM_BP_FAT	regulation of vasculature development	164	1.3	5.3e-07	5.9e-05
GOTERM_BP_FAT	regulation of anatomical structure morphogenesis	614	4.8	5.3e-07	5.9e-05
GOTERM_BP_FAT	hormone metabolic process	126	1	5.5e-07	5.9e-05
GOTERM_BP_FAT	fatty acid metabolic process	234	1.8	5.4e-07	5.9e-05
GOTERM_BP_FAT	axon guidance	151	1.2	5.5e-07	6e-05
GOTERM_BP_FAT	cellular ion homeostasis	359	2.8	6e-07	6.4e-05
GOTERM_BP_FAT	sensory perception of mechanical stimulus	112	0.9	6.1e-07	6.5e-05
GOTERM_BP_FAT	lipid localization	220	1.7	6.2e-07	6.5e-05
GOTERM_BP_FAT	small molecule catabolic process	219	1.7	7.9e-07	8.2e-05
GOTERM_BP_FAT	glycoprotein metabolic process	252	2	8.3e-07	8.5e-05
GOTERM_BP_FAT	intracellular signal transduction	1470	11.6	8.3e-07	8.5e-05
GOTERM_BP_FAT	regulation of metal ion transport	208	1.6	8.3e-07	8.6e-05
GOTERM_BP_FAT	regulation of postsynaptic membrane potential	65	0.5	8.7e-07	8.7e-05
GOTERM_BP_FAT	regulation of cell morphogenesis	347	2.7	8.6e-07	8.7e-05
GOTERM_BP_FAT	regulation of heart contraction	156	1.2	1e-06	0.0001
GOTERM_BP_FAT	regulation of secretion by cell	381	3	1.1e-06	0.0001
GOTERM_BP_FAT	glutamate receptor signaling pathway	57	0.4	1.1e-06	0.00011
GOTERM_BP_FAT	import into cell	57	0.4	1.1e-06	0.00011
GOTERM_BP_FAT	actin filament-based process	403	3.2	1.7e-06	0.00017
GOTERM_BP_FAT	cellular cation homeostasis	348	2.7	1.8e-06	0.00018
GOTERM_BP_FAT	positive regulation of hydrolase activity	537	4.2	2e-06	0.00019
GOTERM_BP_FAT	phosphatidylinositol metabolic process	135	1.1	2e-06	0.00019
GOTERM_BP_FAT	homophilic cell adhesion via plasma membrane adhesion molecules	111	0.9	2.3e-06	0.00021
GOTERM_BP_FAT	cardiac conduction	73	0.6	2.3e-06	0.00022
GOTERM_BP_FAT	positive regulation of cell adhesion	242	1.9	2.4e-06	0.00022
GOTERM_BP_FAT	modulation of synaptic transmission	182	1.4	2.4e-06	0.00022
GOTERM_BP_FAT	organic hydroxy compound metabolic process	256	2	2.5e-06	0.00023
GOTERM_BP_FAT	regulation of cell differentiation	874	6.9	2.8e-06	0.00025
GOTERM_BP_FAT	behavior	338	2.7	2.9e-06	0.00026
GOTERM_BP_FAT	membrane depolarization	69	0.5	3e-06	0.00027
GOTERM_BP_FAT	regulation of molecular function	1572	12.4	3e-06	0.00027
GOTERM_BP_FAT	cilium movement	43	0.3	3.2e-06	0.00028
GOTERM_BP_FAT	regulation of hormone levels	292	2.3	3.2e-06	0.00029
GOTERM_BP_FAT	regulation of ion transmembrane transporter activity	126	1	3.3e-06	0.00029
GOTERM_BP_FAT	locomotory behavior	130	1	3.7e-06	0.00032
GOTERM_BP_FAT	heart contraction	161	1.3	3.7e-06	0.00032
GOTERM_BP_FAT	actin filament-based movement	94	0.7	4e-06	0.00034
GOTERM_BP_FAT	regulation of small GTPase mediated signal transduction	192	1.5	4e-06	0.00034
GOTERM_BP_FAT	positive regulation of developmental process	628	4.9	4.1e-06	0.00035
GOTERM_BP_FAT	carboxylic acid catabolic process	131	1	4.2e-06	0.00035
GOTERM_BP_FAT	lipid catabolic process	189	1.5	4.3e-06	0.00036
GOTERM_BP_FAT	membrane depolarization during action potential	40	0.3	5e-06	0.00042
GOTERM_BP_FAT	inorganic ion import into cell	31	0.2	5.1e-06	0.00042
GOTERM_BP_FAT	inorganic cation import into cell	31	0.2	5.1e-06	0.00042
GOTERM_BP_FAT	sulfur compound metabolic process	233	1.8	5.3e-06	0.00044
GOTERM_BP_FAT	regulation of angiogenesis	147	1.2	5.5e-06	0.00044
GOTERM_BP_FAT	cellular homeostasis	488	3.8	5.6e-06	0.00045
GOTERM_BP_FAT	cell-cell adhesion via plasma-membrane adhesion molecules	151	1.2	5.7e-06	0.00046
GOTERM_BP_FAT	heart process	162	1.3	5.8e-06	0.00046
GOTERM_BP_FAT	positive regulation of transport	535	4.2	6.3e-06	0.0005
GOTERM_BP_FAT	regulation of transmembrane transporter activity	128	1	6.5e-06	0.00051
GOTERM_BP_FAT	neurotransmitter transport	132	1	7e-06	0.00055
GOTERM_BP_FAT	homeostatic process	924	7.3	7.3e-06	0.00057
GOTERM_BP_FAT	regulation of response to external stimulus	426	3.3	7.4e-06	0.00057
GOTERM_BP_FAT	regulation of catalytic activity	1301	10.2	7.7e-06	0.0006
GOTERM_BP_FAT	regulation of nervous system development	452	3.6	8e-06	0.00061
GOTERM_BP_FAT	phospholipid metabolic process	244	1.9	8e-06	0.00061
GOTERM_BP_FAT	single-organism behavior	245	1.9	8.5e-06	0.00064
GOTERM_BP_FAT	inorganic anion transmembrane transport	82	0.6	9.9e-06	0.00075
GOTERM_BP_FAT	regulation of cell projection organization	343	2.7	1.1e-05	0.00081
GOTERM_BP_FAT	lipid phosphorylation	77	0.6	1.1e-05	0.00081
GOTERM_BP_FAT	positive regulation of catalytic activity	876	6.9	1.2e-05	0.0009
GOTERM_BP_FAT	axon development	272	2.1	1.3e-05	0.00098
GOTERM_BP_FAT	glycerolipid metabolic process	235	1.8	1.4e-05	0.00099
GOTERM_BP_FAT	proteoglycan metabolic process	65	0.5	1.4e-05	0.001
GOTERM_BP_FAT	regulation of transporter activity	135	1.1	1.4e-05	0.001
GOTERM_BP_FAT	response to external stimulus	1148	9	1.5e-05	0.001
GOTERM_BP_FAT	organic acid transport	87	0.7	1.5e-05	0.0011
GOTERM_BP_FAT	sensory perception of sound	99	0.8	1.5e-05	0.0011
GOTERM_BP_FAT	multicellular organism metabolic process	93	0.7	1.5e-05	0.0011
GOTERM_BP_FAT	divalent inorganic cation homeostasis	265	2.1	1.5e-05	0.0011
GOTERM_BP_FAT	positive regulation of cell differentiation	489	3.8	1.6e-05	0.0012
GOTERM_BP_FAT	multicellular organismal macromolecule metabolic process	82	0.6	1.7e-05	0.0012
GOTERM_BP_FAT	cognition	163	1.3	1.7e-05	0.0012
GOTERM_BP_FAT	negative regulation of response to external stimulus	171	1.3	1.8e-05	0.0012
GOTERM_BP_FAT	regulation of Ras protein signal transduction	134	1.1	1.9e-05	0.0013
GOTERM_BP_FAT	phosphatidylinositol phosphorylation	69	0.5	1.9e-05	0.0013
GOTERM_BP_FAT	regulation of phosphatidylinositol 3-kinase signaling	98	0.8	2e-05	0.0014
GOTERM_BP_FAT	glycerophospholipid metabolic process	177	1.4	2e-05	0.0014
GOTERM_BP_FAT	glycoprotein biosynthetic process	220	1.7	2.1e-05	0.0014
GOTERM_BP_FAT	T-helper cell differentiation	39	0.3	2.2e-05	0.0015
GOTERM_BP_FAT	regulation of neuron projection development	253	2	2.2e-05	0.0015
GOTERM_BP_FAT	aminoglycan metabolic process	115	0.9	2.3e-05	0.0015
GOTERM_BP_FAT	dendrite development	126	1	2.4e-05	0.0016
GOTERM_BP_FAT	regulation of multicellular organismal development	959	7.5	2.5e-05	0.0016
GOTERM_BP_FAT	cellular metal ion homeostasis	296	2.3	2.6e-05	0.0016
GOTERM_BP_FAT	chloride transport	73	0.6	2.5e-05	0.0017
GOTERM_BP_FAT	cytokine production	373	2.9	2.7e-05	0.0017
GOTERM_BP_FAT	cellular glucuronidation	23	0.2	2.7e-05	0.0017
GOTERM_BP_FAT	regulation of cation transmembrane transport	139	1.1	3e-05	0.0019
GOTERM_BP_FAT	renal system development	179	1.4	3.2e-05	0.002
GOTERM_BP_FAT	CD4-positive, alpha-beta T cell differentiation involved in immune response	40	0.3	3.4e-05	0.0021
GOTERM_BP_FAT	regulation of cell development	492	3.9	3.5e-05	0.0022
GOTERM_BP_FAT	transmission of nerve impulse	49	0.4	3.6e-05	0.0022
GOTERM_BP_FAT	actin-mediated cell contraction	72	0.6	3.6e-05	0.0022
GOTERM_BP_FAT	regulation of cell-substrate adhesion	119	0.9	3.6e-05	0.0022
GOTERM_BP_FAT	detection of mechanical stimulus	36	0.3	3.6e-05	0.0022
GOTERM_BP_FAT	alpha-beta T cell differentiation	64	0.5	3.7e-05	0.0022
GOTERM_BP_FAT	glycosaminoglycan metabolic process	109	0.9	3.7e-05	0.0022
GOTERM_BP_FAT	glycosphingolipid biosynthetic process	25	0.2	3.7e-05	0.0022
GOTERM_BP_FAT	regulation of lipid metabolic process	181	1.4	3.7e-05	0.0022
GOTERM_BP_FAT	regulation of protein secretion	240	1.9	3.8e-05	0.0023
GOTERM_BP_FAT	collagen metabolic process	78	0.6	3.8e-05	0.0023
GOTERM_BP_FAT	monocarboxylic acid transport	94	0.7	4.4e-05	0.0026
GOTERM_BP_FAT	dicarboxylic acid transport	57	0.4	4.4e-05	0.0026
GOTERM_BP_FAT	regulation of neurotransmitter levels	129	1	4.8e-05	0.0028
GOTERM_BP_FAT	regulated exocytosis	181	1.4	4.9e-05	0.0029
GOTERM_BP_FAT	kidney development	169	1.3	5.1e-05	0.003
GOTERM_BP_FAT	protein secretion	282	2.2	5.2e-05	0.003
GOTERM_BP_FAT	alpha-beta T cell activation	80	0.6	5.3e-05	0.0031
GOTERM_BP_FAT	positive regulation of ion transport	138	1.1	5.5e-05	0.0032
GOTERM_BP_FAT	learning or memory	142	1.1	5.5e-05	0.0032
GOTERM_BP_FAT	carbohydrate derivative metabolic process	703	5.5	5.8e-05	0.0033
GOTERM_BP_FAT	positive regulation of molecular function	1018	8	5.8e-05	0.0033
GOTERM_BP_FAT	CD4-positive, alpha-beta T cell differentiation	46	0.4	6e-05	0.0034
GOTERM_BP_FAT	calcium ion homeostasis	246	1.9	6.4e-05	0.0036
GOTERM_BP_FAT	positive regulation of secretion	218	1.7	6.7e-05	0.0038
GOTERM_BP_FAT	chloride transmembrane transport	67	0.5	6.9e-05	0.0038
GOTERM_BP_FAT	phenol-containing compound metabolic process	67	0.5	6.9e-05	0.0038
GOTERM_BP_FAT	xenobiotic metabolic process	70	0.6	7.1e-05	0.004
GOTERM_BP_FAT	axoneme assembly	42	0.3	7.2e-05	0.004
GOTERM_BP_FAT	regulation of alpha-beta T cell activation	54	0.4	7.3e-05	0.004
GOTERM_BP_FAT	carbohydrate derivative biosynthetic process	438	3.4	7.3e-05	0.004
GOTERM_BP_FAT	axonogenesis	250	2	7.7e-05	0.0042
GOTERM_BP_FAT	cellular divalent inorganic cation homeostasis	250	2	7.7e-05	0.0042
GOTERM_BP_FAT	positive regulation of cytokine production	235	1.8	7.7e-05	0.0042
GOTERM_BP_FAT	alpha-beta T cell activation involved in immune response	40	0.3	7.8e-05	0.0042
GOTERM_BP_FAT	alpha-beta T cell differentiation involved in immune response	40	0.3	7.8e-05	0.0042
GOTERM_BP_FAT	organic hydroxy compound transport	127	1	7.9e-05	0.0043
GOTERM_BP_FAT	heart development	304	2.4	8.1e-05	0.0044
GOTERM_BP_FAT	oxidation-reduction process	560	4.4	8.5e-05	0.0045
GOTERM_BP_FAT	phospholipid translocation	21	0.2	8.6e-05	0.0046
GOTERM_BP_FAT	flavonoid glucuronidation	21	0.2	8.6e-05	0.0046
GOTERM_BP_FAT	bicarbonate transport	36	0.3	8.8e-05	0.0047
GOTERM_BP_FAT	regulation of cytosolic calcium ion concentration	182	1.4	9e-05	0.0048
GOTERM_BP_FAT	regulation of anion transport	63	0.5	9.3e-05	0.0049
GOTERM_BP_FAT	striated muscle contraction	107	0.8	9.4e-05	0.0049
GOTERM_BP_FAT	regulation of neurogenesis	397	3.1	9.5e-05	0.0049
GOTERM_BP_FAT	chemotaxis	326	2.6	9.7e-05	0.005
GOTERM_BP_FAT	sensory perception of light stimulus	137	1.1	9.6e-05	0.005
GOTERM_BP_FAT	organophosphate catabolic process	84	0.7	9.8e-05	0.005
GOTERM_BP_FAT	ganglioside biosynthetic process	18	0.1	9.9e-05	0.0051
GOTERM_BP_FAT	cellular hormone metabolic process	75	0.6	0.0001	0.0052
GOTERM_BP_FAT	regulation of muscle contraction	101	0.8	0.0001	0.0053
GOTERM_BP_FAT	negative regulation of cellular component movement	163	1.3	0.00011	0.0055
GOTERM_BP_FAT	regulation of blood coagulation	61	0.5	0.00011	0.0055
GOTERM_BP_FAT	regulation of hemostasis	61	0.5	0.00011	0.0055
GOTERM_BP_FAT	cellular calcium ion homeostasis	238	1.9	0.00011	0.0056
GOTERM_BP_FAT	regulation of synaptic transmission, glutamatergic	41	0.3	0.00011	0.0056
GOTERM_BP_FAT	visual perception	135	1.1	0.00011	0.0056
GOTERM_BP_FAT	drug transport	23	0.2	0.00011	0.0057
GOTERM_BP_FAT	taxis	326	2.6	0.00012	0.0058
GOTERM_BP_FAT	renal system process	76	0.6	0.00012	0.0058
GOTERM_BP_FAT	carbohydrate metabolic process	448	3.5	0.00013	0.0063
GOTERM_BP_FAT	positive regulation of vasculature development	96	0.8	0.00013	0.0063
GOTERM_BP_FAT	negative regulation of locomotion	162	1.3	0.00013	0.0065
GOTERM_BP_FAT	positive regulation of protein kinase activity	280	2.2	0.00014	0.0067
GOTERM_BP_FAT	collagen catabolic process	49	0.4	0.00014	0.0068
GOTERM_BP_FAT	regulation of peptidyl-tyrosine phosphorylation	138	1.1	0.00014	0.0069
GOTERM_BP_FAT	regulation of intracellular signal transduction	947	7.4	0.00014	0.0069
GOTERM_BP_FAT	multicellular organismal homeostasis	195	1.5	0.00015	0.007
GOTERM_BP_FAT	positive regulation of kinase activity	299	2.4	0.00015	0.0071
GOTERM_BP_FAT	muscle cell differentiation	220	1.7	0.00015	0.0072
GOTERM_BP_FAT	organic acid biosynthetic process	173	1.4	0.00015	0.0073
GOTERM_BP_FAT	regulation of calcium ion transport	131	1	0.00015	0.0073
GOTERM_BP_FAT	sialylation	20	0.2	0.00015	0.0073
GOTERM_BP_FAT	cellular response to xenobiotic stimulus	72	0.6	0.00016	0.0076
GOTERM_BP_FAT	positive regulation of cell communication	862	6.8	0.00017	0.0078
GOTERM_BP_FAT	regulation of cytokine production	338	2.7	0.00017	0.0078
GOTERM_BP_FAT	regulation of alpha-beta T cell differentiation	40	0.3	0.00017	0.0078
GOTERM_BP_FAT	single-organism carbohydrate metabolic process	381	3	0.00017	0.0078
GOTERM_BP_FAT	positive regulation of signaling	866	6.8	0.00018	0.0082
GOTERM_BP_FAT	glycolipid biosynthetic process	50	0.4	0.00018	0.0082
GOTERM_BP_FAT	small molecule biosynthetic process	289	2.3	0.00019	0.0086
GOTERM_BP_FAT	multicellular organism catabolic process	53	0.4	0.00019	0.0089
GOTERM_BP_FAT	urogenital system development	196	1.5	0.0002	0.0089
GOTERM_BP_FAT	epithelial cell proliferation	211	1.7	0.0002	0.009
GOTERM_BP_FAT	regulation of neuron differentiation	328	2.6	0.00021	0.0097
GOTERM_BP_FAT	regulation of cardiac conduction	51	0.4	0.00022	0.01
GOTERM_BP_FAT	oligosaccharide metabolic process	51	0.4	0.00022	0.01
GOTERM_BP_FAT	myofibril assembly	41	0.3	0.00023	0.01
GOTERM_BP_FAT	leukocyte cell-cell adhesion	290	2.3	0.00024	0.011
GOTERM_BP_FAT	alpha-amino acid metabolic process	125	1	0.00025	0.011
GOTERM_BP_FAT	mucopolysaccharide metabolic process	78	0.6	0.00025	0.011
GOTERM_BP_FAT	exocytosis	242	1.9	0.00025	0.011
GOTERM_BP_FAT	monocarboxylic acid catabolic process	72	0.6	0.00026	0.011
GOTERM_BP_FAT	membrane lipid metabolic process	130	1	0.00027	0.012
GOTERM_BP_FAT	flavonoid biosynthetic process	19	0.1	0.00028	0.012
GOTERM_BP_FAT	adenylate cyclase-inhibiting G-protein coupled receptor signaling pathway	52	0.4	0.00028	0.012
GOTERM_BP_FAT	inflammatory response	369	2.9	0.00028	0.012
GOTERM_BP_FAT	regulation of lymphocyte differentiation	93	0.7	0.00029	0.013
GOTERM_BP_FAT	positive regulation of lymphocyte differentiation	58	0.5	0.0003	0.013
GOTERM_BP_FAT	actin cytoskeleton organization	323	2.5	0.00031	0.014
GOTERM_BP_FAT	aminoglycan catabolic process	50	0.4	0.00032	0.014
GOTERM_BP_FAT	cellular lipid catabolic process	117	0.9	0.00034	0.014
GOTERM_BP_FAT	organic cation transport	16	0.1	0.00034	0.014
GOTERM_BP_FAT	lipid translocation	21	0.2	0.00034	0.015
GOTERM_BP_FAT	regulation of membrane lipid distribution	31	0.2	0.00036	0.015
GOTERM_BP_FAT	protein autophosphorylation	143	1.1	0.00036	0.015
GOTERM_BP_FAT	negative regulation of cell migration	135	1.1	0.00038	0.016
GOTERM_BP_FAT	detection of mechanical stimulus involved in sensory perception	23	0.2	0.00038	0.016
GOTERM_BP_FAT	cytokine secretion	107	0.8	0.00039	0.016
GOTERM_BP_FAT	cardiac muscle tissue development	119	0.9	0.00039	0.016
GOTERM_BP_FAT	glucuronate metabolic process	25	0.2	0.0004	0.016
GOTERM_BP_FAT	uronic acid metabolic process	25	0.2	0.0004	0.016
GOTERM_BP_FAT	glutamine family amino acid metabolic process	51	0.4	0.0004	0.016
GOTERM_BP_FAT	glycosylation	177	1.4	0.00041	0.017
GOTERM_BP_FAT	protein phosphorylation	1014	8	0.00042	0.017
GOTERM_BP_FAT	positive regulation of MAPK cascade	285	2.2	0.00042	0.017
GOTERM_BP_FAT	T cell differentiation	129	1	0.00045	0.018
GOTERM_BP_FAT	monovalent inorganic cation homeostasis	94	0.7	0.00047	0.019
GOTERM_BP_FAT	drug transmembrane transport	18	0.1	0.00049	0.02
GOTERM_BP_FAT	membrane depolarization during cardiac muscle cell action potential	18	0.1	0.00049	0.02
GOTERM_BP_FAT	membrane lipid biosynthetic process	91	0.7	0.0005	0.02
GOTERM_BP_FAT	positive regulation of synaptic transmission	74	0.6	0.00052	0.021
GOTERM_BP_FAT	cell-cell signaling	836	6.6	0.00054	0.022
GOTERM_BP_FAT	protein homooligomerization	164	1.3	0.00056	0.022
GOTERM_BP_FAT	sensory perception of pain	53	0.4	0.00058	0.023
GOTERM_BP_FAT	regulation of coagulation	62	0.5	0.00058	0.023
GOTERM_BP_FAT	response to xenobiotic stimulus	75	0.6	0.00059	0.023
GOTERM_BP_FAT	smooth muscle contraction	59	0.5	0.00059	0.023
GOTERM_BP_FAT	regulation of Rho protein signal transduction	82	0.6	0.00059	0.023
GOTERM_BP_FAT	leukocyte aggregation	267	2.1	0.0006	0.024
GOTERM_BP_FAT	integrin-mediated signaling pathway	72	0.6	0.00061	0.024
GOTERM_BP_FAT	glycosaminoglycan catabolic process	45	0.4	0.00062	0.024
GOTERM_BP_FAT	activation of protein kinase activity	181	1.4	0.00063	0.024
GOTERM_BP_FAT	import across plasma membrane	24	0.2	0.00065	0.025
GOTERM_BP_FAT	chemical synaptic transmission, postsynaptic	48	0.4	0.00066	0.025
GOTERM_BP_FAT	tissue remodeling	94	0.7	0.00066	0.025
GOTERM_BP_FAT	monocarboxylic acid biosynthetic process	118	0.9	0.00067	0.026
GOTERM_BP_FAT	muscle structure development	340	2.7	0.00069	0.026
GOTERM_BP_FAT	regulation of antigen receptor-mediated signaling pathway	33	0.3	0.00073	0.028
GOTERM_BP_FAT	cardiac muscle cell action potential involved in contraction	33	0.3	0.00073	0.028
GOTERM_BP_FAT	positive regulation of angiogenesis	84	0.7	0.00073	0.028
GOTERM_BP_FAT	regulation of endothelial cell migration	77	0.6	0.00074	0.028
GOTERM_BP_FAT	central nervous system development	509	4	0.00074	0.028
GOTERM_BP_FAT	positive regulation of cell migration	234	1.8	0.00077	0.029
GOTERM_BP_FAT	smoothened signaling pathway	74	0.6	0.00078	0.029
GOTERM_BP_FAT	regulation of cell-cell adhesion	229	1.8	0.00078	0.029
GOTERM_BP_FAT	regulation of cell morphogenesis involved in differentiation	203	1.6	0.00082	0.031
GOTERM_BP_FAT	positive regulation of protein phosphorylation	501	3.9	0.00084	0.031
GOTERM_BP_FAT	inner ear development	113	0.9	0.00085	0.031
GOTERM_BP_FAT	response to abiotic stimulus	575	4.5	0.00086	0.032
GOTERM_BP_FAT	regulation of potassium ion transmembrane transport	44	0.3	0.00089	0.033
GOTERM_BP_FAT	lymphocyte aggregation	262	2.1	0.00089	0.033
GOTERM_BP_FAT	cardiac muscle cell action potential	47	0.4	0.00093	0.034
GOTERM_BP_FAT	CD4-positive, alpha-beta T cell activation	47	0.4	0.00093	0.034
GOTERM_BP_FAT	regulation of smoothened signaling pathway	47	0.4	0.00093	0.034
GOTERM_BP_FAT	carboxylic acid biosynthetic process	160	1.3	0.00094	0.034
GOTERM_BP_FAT	leukocyte migration	223	1.8	0.00094	0.034
GOTERM_BP_FAT	regulation of synapse structure or activity	146	1.1	0.00096	0.035
GOTERM_BP_FAT	positive regulation of phosphate metabolic process	585	4.6	0.00099	0.036
GOTERM_BP_FAT	positive regulation of phosphorus metabolic process	585	4.6	0.00099	0.036
GOTERM_BP_FAT	endothelial cell migration	99	0.8	0.001	0.036
GOTERM_BP_FAT	regulation of cell activation	291	2.3	0.001	0.036
GOTERM_BP_FAT	dendrite morphogenesis	66	0.5	0.001	0.036
GOTERM_BP_FAT	cell-cell adhesion	646	5.1	0.001	0.036
GOTERM_BP_FAT	calcium ion import	103	0.8	0.001	0.036
GOTERM_BP_FAT	vascular endothelial growth factor production	25	0.2	0.001	0.036
GOTERM_BP_FAT	T cell activation	261	2.1	0.001	0.037
GOTERM_BP_FAT	T cell aggregation	261	2.1	0.001	0.037
GOTERM_BP_FAT	purine-containing compound catabolic process	42	0.3	0.001	0.037
GOTERM_BP_FAT	regulation of wound healing	84	0.7	0.001	0.037
GOTERM_BP_FAT	positive regulation of vascular endothelial growth factor production	23	0.2	0.0011	0.037
GOTERM_BP_FAT	striated muscle cell differentiation	153	1.2	0.0011	0.038
GOTERM_BP_FAT	regulation of striated muscle contraction	60	0.5	0.0011	0.038
GOTERM_BP_FAT	plasma membrane organization	168	1.3	0.0011	0.038
GOTERM_BP_FAT	enzyme linked receptor protein signaling pathway	534	4.2	0.0011	0.038
GOTERM_BP_FAT	T cell selection	32	0.3	0.0011	0.038
GOTERM_BP_FAT	chondroitin sulfate metabolic process	32	0.3	0.0011	0.038
GOTERM_BP_FAT	nucleotide catabolic process	48	0.4	0.0011	0.038
GOTERM_BP_FAT	protein glycosylation	169	1.3	0.0011	0.039
GOTERM_BP_FAT	macromolecule glycosylation	169	1.3	0.0011	0.039
GOTERM_BP_FAT	negative regulation of cell motility	140	1.1	0.0011	0.039
GOTERM_BP_FAT	regulation of B cell receptor signaling pathway	14	0.1	0.0012	0.04
GOTERM_BP_FAT	G-protein coupled glutamate receptor signaling pathway	14	0.1	0.0012	0.04
GOTERM_BP_FAT	protein processing	145	1.1	0.0012	0.04
GOTERM_BP_FAT	sulfur compound biosynthetic process	127	1	0.0012	0.041
GOTERM_BP_FAT	lymphocyte differentiation	186	1.5	0.0012	0.041
GOTERM_BP_FAT	interleukin-2 production	43	0.3	0.0013	0.043
GOTERM_BP_FAT	epithelium migration	142	1.1	0.0013	0.043
GOTERM_BP_FAT	fatty acid transport	58	0.5	0.0013	0.043
GOTERM_BP_FAT	regulation of T cell differentiation	75	0.6	0.0013	0.043
GOTERM_BP_FAT	regulation of ion homeostasis	124	1	0.0013	0.044
GOTERM_BP_FAT	regulation of epithelial cell migration	107	0.8	0.0013	0.045
GOTERM_BP_FAT	positive regulation of cytosolic calcium ion concentration	163	1.3	0.0014	0.045
GOTERM_BP_FAT	regulation of blood pressure	108	0.8	0.0014	0.048
GOTERM_BP_FAT	regulation of epithelial cell proliferation	180	1.4	0.0015	0.048
GOTERM_BP_FAT	bile acid metabolic process	33	0.3	0.0015	0.048
GOTERM_BP_FAT	chondroitin sulfate proteoglycan metabolic process	33	0.3	0.0015	0.048
GOTERM_BP_FAT	response to endogenous stimulus	847	6.7	0.0015	0.048
GOTERM_BP_FAT	positive regulation of peptidyl-tyrosine phosphorylation	104	0.8	0.0015	0.048
GOTERM_BP_FAT	T cell differentiation involved in immune response	41	0.3	0.0015	0.048
GOTERM_BP_FAT	transmembrane receptor protein tyrosine kinase signaling pathway	369	2.9	0.0015	0.049
GOTERM_BP_FAT	cellular monovalent inorganic cation homeostasis	73	0.6	0.0015	0.049
GOTERM_BP_FAT	sphingolipid biosynthetic process	66	0.5	0.0015	0.049

## Sheet: Cluster 3_M
Category	Term	Count	%	P-Value	Benjamini
GOTERM_BP_FAT	SRP-dependent cotranslational protein targeting to membrane	59	1.6	9.2e-26	4.2e-22
GOTERM_BP_FAT	protein targeting to ER	62	1.6	4.9e-26	4.4e-22
GOTERM_BP_FAT	establishment of protein localization to endoplasmic reticulum	62	1.6	8e-25	2.4e-21
GOTERM_BP_FAT	cotranslational protein targeting to membrane	59	1.6	1.4e-23	3.2e-20
GOTERM_BP_FAT	protein localization to endoplasmic reticulum	66	1.8	6.4e-23	1.2e-19
GOTERM_BP_FAT	nuclear-transcribed mRNA catabolic process, nonsense-mediated decay	60	1.6	2.2e-19	3.4e-16
GOTERM_BP_FAT	protein targeting to membrane	75	2	1.6e-17	2.1e-14
GOTERM_BP_FAT	nuclear-transcribed mRNA catabolic process	76	2	1.1e-15	1.3e-12
GOTERM_BP_FAT	translational initiation	70	1.9	1.2e-14	1.2e-11
GOTERM_BP_FAT	mRNA catabolic process	77	2	2.3e-14	2e-11
GOTERM_BP_FAT	translation	162	4.3	5.3e-14	4e-11
GOTERM_BP_FAT	viral transcription	67	1.8	4.9e-14	4.1e-11
GOTERM_BP_FAT	peptide biosynthetic process	166	4.4	1e-13	7.3e-11
GOTERM_BP_FAT	viral gene expression	68	1.8	3.6e-13	2.3e-10
GOTERM_BP_FAT	amide biosynthetic process	176	4.7	7.8e-13	4.7e-10
GOTERM_BP_FAT	RNA catabolic process	80	2.1	9.1e-13	5.2e-10
GOTERM_BP_FAT	ribosome biogenesis	98	2.6	1.2e-12	6.4e-10
GOTERM_BP_FAT	multi-organism metabolic process	71	1.9	3.6e-12	1.8e-09
GOTERM_BP_FAT	rRNA processing	82	2.2	9.9e-12	4.7e-09
GOTERM_BP_FAT	establishment of protein localization to membrane	101	2.7	3.3e-11	1.5e-08
GOTERM_BP_FAT	rRNA metabolic process	82	2.2	4.1e-11	1.8e-08
GOTERM_BP_FAT	nucleobase-containing compound catabolic process	103	2.7	4.6e-11	1.9e-08
GOTERM_BP_FAT	peptide metabolic process	183	4.9	1.1e-10	4.4e-08
GOTERM_BP_FAT	organonitrogen compound biosynthetic process	277	7.4	2.3e-10	8.8e-08
GOTERM_BP_FAT	viral life cycle	115	3.1	3.3e-10	1.2e-07
GOTERM_BP_FAT	single-organism intracellular transport	159	4.2	3.9e-10	1.4e-07
GOTERM_BP_FAT	multi-organism cellular process	206	5.5	1.1e-09	3.6e-07
GOTERM_BP_FAT	heterocycle catabolic process	105	2.8	1.1e-09	3.6e-07
GOTERM_BP_FAT	aromatic compound catabolic process	107	2.8	1.4e-09	4.4e-07
GOTERM_BP_FAT	organic cyclic compound catabolic process	111	2.9	1.6e-09	4.8e-07
GOTERM_BP_FAT	symbiosis, encompassing mutualism through parasitism	209	5.5	2.1e-09	6.1e-07
GOTERM_BP_FAT	interspecies interaction between organisms	209	5.5	2.1e-09	6.1e-07
GOTERM_BP_FAT	ribonucleoprotein complex biogenesis	117	3.1	2.4e-09	6.7e-07
GOTERM_BP_FAT	viral process	203	5.4	2.7e-09	7.5e-07
GOTERM_BP_FAT	ncRNA processing	103	2.7	5e-09	1.3e-06
GOTERM_BP_FAT	cellular nitrogen compound catabolic process	104	2.8	6.3e-09	1.6e-06
GOTERM_BP_FAT	defense response	293	7.8	7e-09	1.8e-06
GOTERM_BP_FAT	establishment of protein localization to organelle	148	3.9	1.3e-08	3.2e-06
GOTERM_BP_FAT	protein targeting	154	4.1	1.4e-08	3.4e-06
GOTERM_BP_FAT	cellular amide metabolic process	204	5.4	1.8e-08	4.2e-06
GOTERM_BP_FAT	protein localization to membrane	114	3	5.2e-08	1.2e-05
GOTERM_BP_FAT	ncRNA metabolic process	128	3.4	7.3e-08	1.6e-05
GOTERM_BP_FAT	positive regulation of cell proliferation	173	4.6	4.1e-07	8.8e-05
GOTERM_BP_FAT	response to cytokine	164	4.4	6.8e-07	0.00014
GOTERM_BP_FAT	intracellular protein transport	198	5.3	1.9e-06	0.00038
GOTERM_BP_FAT	response to biotic stimulus	173	4.6	2.5e-06	0.00049
GOTERM_BP_FAT	cellular response to cytokine stimulus	145	3.8	2.5e-06	0.0005
GOTERM_BP_FAT	regulation of cell proliferation	283	7.5	2.5e-06	0.00051
GOTERM_BP_FAT	ribosome assembly	24	0.6	3.2e-06	0.0006
GOTERM_BP_FAT	ribosomal large subunit biogenesis	25	0.7	7.7e-06	0.0014
GOTERM_BP_FAT	cell killing	35	0.9	8e-06	0.0015
GOTERM_BP_FAT	cellular response to chemical stimulus	448	11.9	1.1e-05	0.0019
GOTERM_BP_FAT	chemokine-mediated signaling pathway	28	0.7	1.3e-05	0.0023
GOTERM_BP_FAT	response to organic substance	471	12.5	2.5e-05	0.0043
GOTERM_BP_FAT	response to external biotic stimulus	160	4.2	2.8e-05	0.0045
GOTERM_BP_FAT	response to other organism	160	4.2	2.8e-05	0.0045
GOTERM_BP_FAT	mitochondrial translational elongation	28	0.7	2.7e-05	0.0045
GOTERM_BP_FAT	protein localization to organelle	172	4.6	2.7e-05	0.0046
GOTERM_BP_FAT	antigen processing and presentation of exogenous peptide antigen via MHC class I, TAP-independent	8	0.2	3.2e-05	0.005
GOTERM_BP_FAT	mitochondrial translational termination	28	0.7	3.4e-05	0.0054
GOTERM_BP_FAT	translational termination	30	0.8	4e-05	0.006
GOTERM_BP_FAT	leukocyte mediated cytotoxicity	27	0.7	3.9e-05	0.0061
GOTERM_BP_FAT	mRNA metabolic process	133	3.5	4.3e-05	0.0064
GOTERM_BP_FAT	mitochondrial translation	34	0.9	8.2e-05	0.012
GOTERM_BP_FAT	cell chemotaxis	59	1.6	8.9e-05	0.013
GOTERM_BP_FAT	response to bacterium	110	2.9	8.7e-05	0.013
GOTERM_BP_FAT	negative regulation of cell death	168	4.5	9.3e-05	0.013
GOTERM_BP_FAT	translational elongation	37	1	0.00011	0.016
GOTERM_BP_FAT	negative regulation of programmed cell death	156	4.1	0.00013	0.017
GOTERM_BP_FAT	RNA processing	169	4.5	0.00013	0.017
GOTERM_BP_FAT	antigen processing and presentation	54	1.4	0.00013	0.018
GOTERM_BP_FAT	immune response	270	7.2	0.00014	0.018
GOTERM_BP_FAT	single-organism cellular localization	199	5.3	0.00017	0.021
GOTERM_BP_FAT	inflammatory response	124	3.3	0.00016	0.021
GOTERM_BP_FAT	innate immune response	156	4.1	0.00019	0.024
GOTERM_BP_FAT	negative regulation of apoptotic process	153	4.1	0.0002	0.025
GOTERM_BP_FAT	regulation of gastrulation	15	0.4	0.00022	0.027
GOTERM_BP_FAT	response to testosterone	15	0.4	0.00022	0.027
GOTERM_BP_FAT	cellular defense response	21	0.6	0.00023	0.027
GOTERM_BP_FAT	response to unfolded protein	43	1.1	0.00023	0.027
GOTERM_BP_FAT	leukocyte chemotaxis	47	1.2	0.00025	0.028
GOTERM_BP_FAT	cellular response to organic substance	364	9.7	0.00032	0.036
GOTERM_BP_FAT	regulation of cell death	260	6.9	0.00035	0.039
GOTERM_BP_FAT	regulation of programmed cell death	245	6.5	0.00037	0.041
GOTERM_BP_FAT	response to topologically incorrect protein	45	1.2	0.00045	0.048
GOTERM_BP_FAT	regulation of apoptotic process	242	6.4	0.00047	0.049

## Sheet: Cluster 4_M
Category	Term	Count	%	P-Value	Benjamini
GOTERM_BP_FAT	detection of chemical stimulus involved in sensory perception	395	5.5	2e-254	1.6e-250
GOTERM_BP_FAT	detection of chemical stimulus involved in sensory perception of smell	368	5.2	4.2e-250	1.7e-246
GOTERM_BP_FAT	sensory perception of smell	373	5.2	8.6e-234	1.8e-230
GOTERM_BP_FAT	detection of stimulus involved in sensory perception	403	5.7	8e-234	2.2e-230
GOTERM_BP_FAT	detection of chemical stimulus	398	5.6	9.6e-233	1.6e-229
GOTERM_BP_FAT	sensory perception of chemical stimulus	403	5.7	1.8e-230	2.5e-227
GOTERM_BP_FAT	G-protein coupled receptor signaling pathway	602	8.4	1.4e-192	1.6e-189
GOTERM_BP_FAT	detection of stimulus	420	5.9	4e-184	4.1e-181
GOTERM_BP_FAT	sensory perception	472	6.6	1.1e-153	1e-150
GOTERM_BP_FAT	neurological system process	524	7.4	4.2e-128	3.5e-125
GOTERM_BP_FAT	system process	634	8.9	1e-96	7.8e-94
GOTERM_BP_FAT	nucleosome assembly	79	1.1	4e-27	2.8e-24
GOTERM_BP_FAT	chromatin assembly	80	1.1	3e-24	1.9e-21
GOTERM_BP_FAT	nucleosome organization	81	1.1	9.5e-23	5.6e-20
GOTERM_BP_FAT	chromatin assembly or disassembly	83	1.2	1e-21	5.7e-19
GOTERM_BP_FAT	DNA packaging	86	1.2	3e-21	1.5e-18
GOTERM_BP_FAT	protein-DNA complex assembly	90	1.3	4.3e-19	2.1e-16
GOTERM_BP_FAT	chromatin silencing	58	0.8	3.3e-18	1.5e-15
GOTERM_BP_FAT	protein-DNA complex subunit organization	92	1.3	1.1e-16	4.8e-14
GOTERM_BP_FAT	keratinization	33	0.5	1.6e-15	6.1e-13
GOTERM_BP_FAT	negative regulation of gene expression, epigenetic	59	0.8	1.6e-15	6.4e-13
GOTERM_BP_FAT	peptide cross-linking	35	0.5	2.2e-15	8.3e-13
GOTERM_BP_FAT	DNA conformation change	93	1.3	1.4e-14	5.1e-12
GOTERM_BP_FAT	defense response to bacterium	88	1.2	4e-14	1.4e-11
GOTERM_BP_FAT	chromatin silencing at rDNA	27	0.4	1.8e-13	5.8e-11
GOTERM_BP_FAT	DNA replication-dependent nucleosome assembly	24	0.3	3.7e-13	1.2e-10
GOTERM_BP_FAT	DNA replication-dependent nucleosome organization	24	0.3	3.7e-13	1.2e-10
GOTERM_BP_FAT	detection of chemical stimulus involved in sensory perception of bitter taste	27	0.4	4.3e-13	1.3e-10
GOTERM_BP_FAT	protein heterotetramerization	27	0.4	2.3e-12	6.8e-10
GOTERM_BP_FAT	keratinocyte differentiation	48	0.7	2e-11	5.8e-09
GOTERM_BP_FAT	sensory perception of bitter taste	27	0.4	2.2e-11	5.9e-09
GOTERM_BP_FAT	detection of chemical stimulus involved in sensory perception of taste	27	0.4	4.3e-11	1.1e-08
GOTERM_BP_FAT	defense response to other organism	126	1.8	1.3e-10	3.2e-08
GOTERM_BP_FAT	chemokine-mediated signaling pathway	37	0.5	1.3e-10	3.3e-08
GOTERM_BP_FAT	antibacterial humoral response	29	0.4	2.1e-10	5.1e-08
GOTERM_BP_FAT	positive regulation of peptidyl-serine phosphorylation of STAT protein	17	0.2	3.8e-10	8.8e-08
GOTERM_BP_FAT	antimicrobial humoral response	30	0.4	5e-10	1.1e-07
GOTERM_BP_FAT	regulation of peptidyl-serine phosphorylation of STAT protein	17	0.2	1.2e-09	2.7e-07
GOTERM_BP_FAT	defense response to Gram-positive bacterium	37	0.5	1.4e-09	3.1e-07
GOTERM_BP_FAT	adenylate cyclase-activating G-protein coupled receptor signaling pathway	38	0.5	2.2e-09	4.6e-07
GOTERM_BP_FAT	negative regulation of megakaryocyte differentiation	15	0.2	3.1e-09	6.5e-07
GOTERM_BP_FAT	neuron fate commitment	31	0.4	3.9e-09	7.9e-07
GOTERM_BP_FAT	epidermal cell differentiation	57	0.8	6.7e-09	1.3e-06
GOTERM_BP_FAT	response to bacterium	129	1.8	1e-08	1.9e-06
GOTERM_BP_FAT	regionalization	87	1.2	2e-08	3.8e-06
GOTERM_BP_FAT	innate immune response in mucosa	17	0.2	2.1e-08	3.9e-06
GOTERM_BP_FAT	mucosal immune response	20	0.3	2.4e-08	4.2e-06
GOTERM_BP_FAT	response to other organism	178	2.5	3.7e-08	6.6e-06
GOTERM_BP_FAT	response to external biotic stimulus	178	2.5	3.7e-08	6.6e-06
GOTERM_BP_FAT	organ or tissue specific immune response	20	0.3	8.1e-08	1.4e-05
GOTERM_BP_FAT	anterior/posterior pattern specification	59	0.8	9.3e-08	1.6e-05
GOTERM_BP_FAT	serine phosphorylation of STAT protein	17	0.2	1e-07	1.6e-05
GOTERM_BP_FAT	natural killer cell activation involved in immune response	18	0.3	9.9e-08	1.6e-05
GOTERM_BP_FAT	G-protein coupled receptor signaling pathway, coupled to cyclic nucleotide second messenger	57	0.8	1.5e-07	2.4e-05
GOTERM_BP_FAT	pattern specification process	104	1.5	2.3e-07	3.5e-05
GOTERM_BP_FAT	lymphocyte chemotaxis	25	0.4	2.7e-07	4.2e-05
GOTERM_BP_FAT	sensory perception of taste	28	0.4	3.3e-07	4.9e-05
GOTERM_BP_FAT	response to biotic stimulus	181	2.5	3.5e-07	5.2e-05
GOTERM_BP_FAT	defense response to fungus	20	0.3	4.2e-07	6.1e-05
GOTERM_BP_FAT	cell-cell adhesion via plasma-membrane adhesion molecules	63	0.9	5.1e-07	7.2e-05
GOTERM_BP_FAT	adenylate cyclase-modulating G-protein coupled receptor signaling pathway	50	0.7	6.2e-07	8.6e-05
GOTERM_BP_FAT	neutrophil chemotaxis	31	0.4	1.1e-06	0.00015
GOTERM_BP_FAT	skin development	63	0.9	1.5e-06	0.00021
GOTERM_BP_FAT	monocyte chemotaxis	25	0.4	1.8e-06	0.00024
GOTERM_BP_FAT	epidermis development	75	1.1	2.1e-06	0.00026
GOTERM_BP_FAT	cell fate commitment	64	0.9	2.1e-06	0.00027
GOTERM_BP_FAT	humoral immune response	65	0.9	2e-06	0.00027
GOTERM_BP_FAT	negative regulation of RNA biosynthetic process	231	3.2	2.1e-06	0.00027
GOTERM_BP_FAT	neuron fate specification	17	0.2	2.2e-06	0.00028
GOTERM_BP_FAT	regulation of megakaryocyte differentiation	16	0.2	2.7e-06	0.00033
GOTERM_BP_FAT	epithelial cell differentiation	122	1.7	4e-06	0.00047
GOTERM_BP_FAT	lymphocyte migration	29	0.4	3.9e-06	0.00047
GOTERM_BP_FAT	negative regulation of nucleic acid-templated transcription	226	3.2	4.7e-06	0.00055
GOTERM_BP_FAT	feeding behavior	34	0.5	5.2e-06	0.0006
GOTERM_BP_FAT	granulocyte chemotaxis	34	0.5	5.2e-06	0.0006
GOTERM_BP_FAT	defense response	281	3.9	6.2e-06	0.0007
GOTERM_BP_FAT	response to fungus	22	0.3	6.8e-06	0.00075
GOTERM_BP_FAT	cell fate specification	29	0.4	6.8e-06	0.00076
GOTERM_BP_FAT	neuropeptide signaling pathway	33	0.5	9.3e-06	0.001
GOTERM_BP_FAT	positive regulation of gene expression, epigenetic	28	0.4	9.7e-06	0.001
GOTERM_BP_FAT	embryonic organ development	94	1.3	1.1e-05	0.0012
GOTERM_BP_FAT	adenylate cyclase-activating serotonin receptor signaling pathway	10	0.1	1.2e-05	0.0012
GOTERM_BP_FAT	protein heterooligomerization	37	0.5	1.3e-05	0.0013
GOTERM_BP_FAT	positive regulation of response to external stimulus	66	0.9	1.4e-05	0.0014
GOTERM_BP_FAT	cellular response to zinc ion	12	0.2	1.5e-05	0.0015
GOTERM_BP_FAT	neutrophil migration	31	0.4	1.5e-05	0.0015
GOTERM_BP_FAT	negative regulation of transcription, DNA-templated	215	3	1.6e-05	0.0015
GOTERM_BP_FAT	regulation of gene expression, epigenetic	65	0.9	1.6e-05	0.0016
GOTERM_BP_FAT	negative regulation of RNA metabolic process	232	3.3	2.3e-05	0.0022
GOTERM_BP_FAT	leukocyte chemotaxis	51	0.7	2.7e-05	0.0025
GOTERM_BP_FAT	negative regulation of hemopoiesis	39	0.5	3.6e-05	0.0034
GOTERM_BP_FAT	adenylate cyclase-activating adrenergic receptor signaling pathway	12	0.2	5.2e-05	0.0047
GOTERM_BP_FAT	cAMP metabolic process	40	0.6	5.2e-05	0.0047
GOTERM_BP_FAT	positive regulation of leukocyte migration	33	0.5	5.1e-05	0.0048
GOTERM_BP_FAT	B cell proliferation	28	0.4	5.4e-05	0.0048
GOTERM_BP_FAT	granulocyte migration	34	0.5	5.4e-05	0.0048
GOTERM_BP_FAT	regulation of cAMP metabolic process	37	0.5	5.9e-05	0.0052
GOTERM_BP_FAT	oxygen transport	10	0.1	6.2e-05	0.0053
GOTERM_BP_FAT	homophilic cell adhesion via plasma membrane adhesion molecules	43	0.6	6.2e-05	0.0053
GOTERM_BP_FAT	positive regulation of leukocyte chemotaxis	27	0.4	6.1e-05	0.0053
GOTERM_BP_FAT	gene silencing	61	0.9	6.4e-05	0.0054
GOTERM_BP_FAT	positive regulation of cAMP metabolic process	28	0.4	6.8e-05	0.0056
GOTERM_BP_FAT	chromatin organization	151	2.1	6.7e-05	0.0056
GOTERM_BP_FAT	embryonic organ morphogenesis	67	0.9	7e-05	0.0057
GOTERM_BP_FAT	innate immune response	162	2.3	7.5e-05	0.0061
GOTERM_BP_FAT	positive regulation of cyclic nucleotide metabolic process	32	0.4	8.8e-05	0.007
GOTERM_BP_FAT	regulation of cyclic nucleotide metabolic process	41	0.6	0.00014	0.011
GOTERM_BP_FAT	cyclic nucleotide biosynthetic process	40	0.6	0.00014	0.011
GOTERM_BP_FAT	cyclic nucleotide metabolic process	48	0.7	0.00013	0.011
GOTERM_BP_FAT	cytokine-mediated signaling pathway	113	1.6	0.00014	0.011
GOTERM_BP_FAT	megakaryocyte differentiation	18	0.3	0.00014	0.011
GOTERM_BP_FAT	cAMP biosynthetic process	33	0.5	0.00016	0.012
GOTERM_BP_FAT	cyclic purine nucleotide metabolic process	39	0.5	0.00019	0.014
GOTERM_BP_FAT	epithelium development	196	2.7	0.0002	0.015
GOTERM_BP_FAT	regulation of cAMP biosynthetic process	32	0.4	0.00022	0.016
GOTERM_BP_FAT	cellular response to interleukin-1	27	0.4	0.00022	0.016
GOTERM_BP_FAT	negative regulation of myeloid cell differentiation	28	0.4	0.00024	0.017
GOTERM_BP_FAT	embryonic skeletal system development	34	0.5	0.00027	0.019
GOTERM_BP_FAT	serotonin receptor signaling pathway	13	0.2	0.00027	0.019
GOTERM_BP_FAT	response to external stimulus	355	5	0.00032	0.022
GOTERM_BP_FAT	apoptotic process involved in heart morphogenesis	6	0.1	0.00034	0.024
GOTERM_BP_FAT	regulation of leukocyte chemotaxis	29	0.4	0.00035	0.024
GOTERM_BP_FAT	negative regulation of nucleobase-containing compound metabolic process	244	3.4	0.00036	0.025
GOTERM_BP_FAT	response to exogenous dsRNA	17	0.2	0.00037	0.025
GOTERM_BP_FAT	response to zinc ion	19	0.3	0.00041	0.027
GOTERM_BP_FAT	positive regulation of chemotaxis	33	0.5	0.00043	0.028
GOTERM_BP_FAT	histone exchange	20	0.3	0.00046	0.03
GOTERM_BP_FAT	regulation of cyclic nucleotide biosynthetic process	35	0.5	0.00049	0.032
GOTERM_BP_FAT	GABAergic neuron differentiation	9	0.1	0.00049	0.032
GOTERM_BP_FAT	positive regulation of inflammatory response	32	0.4	0.00051	0.032
GOTERM_BP_FAT	neuron fate determination	7	0.1	0.00053	0.034
GOTERM_BP_FAT	cerebral cortex GABAergic interneuron differentiation	8	0.1	0.00055	0.035
GOTERM_BP_FAT	regulation of myeloid cell differentiation	46	0.6	0.00058	0.036
GOTERM_BP_FAT	positive regulation of cAMP biosynthetic process	24	0.3	0.00063	0.039
GOTERM_BP_FAT	vascular process in circulatory system	40	0.6	0.00065	0.04
GOTERM_BP_FAT	gas transport	10	0.1	0.00066	0.04
GOTERM_BP_FAT	inflammatory response	123	1.7	0.00068	0.041
GOTERM_BP_FAT	JAK-STAT cascade	42	0.6	0.00069	0.041
GOTERM_BP_FAT	multi-organism reproductive process	172	2.4	0.00068	0.041
GOTERM_BP_FAT	CENP-A containing nucleosome assembly	16	0.2	0.0007	0.042
GOTERM_BP_FAT	negative regulation of blood pressure	16	0.2	0.0007	0.042
GOTERM_BP_FAT	CENP-A containing chromatin organization	16	0.2	0.0007	0.042
GOTERM_BP_FAT	endocrine system development	34	0.5	0.00078	0.045
GOTERM_BP_FAT	calcium-independent cell-cell adhesion via plasma membrane cell-adhesion molecules	11	0.2	0.00077	0.045
GOTERM_BP_FAT	positive regulation of peptidyl-serine phosphorylation	26	0.4	0.00081	0.047
GOTERM_BP_FAT	adrenergic receptor signaling pathway	12	0.2	0.00082	0.047

## Sheet: Cluster 1_CMes
Category	Term	Count	%	P-Value	Benjamini
GOTERM_BP_FAT	gene expression	2160	38	1.9e-97	2e-93
GOTERM_BP_FAT	RNA metabolic process	1924	33.9	1.5e-90	8e-87
GOTERM_BP_FAT	cellular macromolecule biosynthetic process	1963	34.5	4.3e-67	1.6e-63
GOTERM_BP_FAT	RNA processing	504	8.9	1.5e-61	3.9e-58
GOTERM_BP_FAT	cell cycle	794	14	9.9e-59	2.1e-55
GOTERM_BP_FAT	regulation of nitrogen compound metabolic process	1729	30.4	3.2e-57	5.7e-54
GOTERM_BP_FAT	regulation of gene expression	1709	30.1	5.1e-57	7.8e-54
GOTERM_BP_FAT	mitotic cell cycle	516	9.1	5.3e-56	7.2e-53
GOTERM_BP_FAT	mitotic cell cycle process	482	8.5	7.2e-55	8.6e-52
GOTERM_BP_FAT	cell cycle process	662	11.7	1.5e-53	1.6e-50
GOTERM_BP_FAT	intracellular transport	747	13.1	3.7e-52	3.6e-49
GOTERM_BP_FAT	regulation of cellular macromolecule biosynthetic process	1571	27.6	2.4e-51	2.1e-48
GOTERM_BP_FAT	regulation of macromolecule biosynthetic process	1601	28.2	2.2e-49	1.8e-46
GOTERM_BP_FAT	mRNA processing	293	5.2	4.4e-49	3.4e-46
GOTERM_BP_FAT	mRNA metabolic process	380	6.7	4.9e-49	3.5e-46
GOTERM_BP_FAT	macromolecular complex subunit organization	1045	18.4	2e-48	1.4e-45
GOTERM_BP_FAT	cellular localization	1067	18.8	8.2e-47	5.2e-44
GOTERM_BP_FAT	heterocycle biosynthetic process	1688	29.7	1.2e-46	7.3e-44
GOTERM_BP_FAT	nucleobase-containing compound biosynthetic process	1670	29.4	1.7e-46	9.4e-44
GOTERM_BP_FAT	aromatic compound biosynthetic process	1689	29.7	6.7e-46	3.6e-43
GOTERM_BP_FAT	protein modification by small protein conjugation	458	8.1	1.3e-44	6.5e-42
GOTERM_BP_FAT	protein modification by small protein conjugation or removal	514	9	2.4e-44	1.2e-41
GOTERM_BP_FAT	chromosome organization	570	10	1.5e-43	7e-41
GOTERM_BP_FAT	RNA biosynthetic process	1510	26.6	2e-43	9e-41
GOTERM_BP_FAT	regulation of nucleobase-containing compound metabolic process	1574	27.7	2.9e-43	1.3e-40
GOTERM_BP_FAT	nucleic acid-templated transcription	1465	25.8	3.8e-43	1.6e-40
GOTERM_BP_FAT	establishment of localization in cell	865	15.2	1.5e-42	6.1e-40
GOTERM_BP_FAT	RNA splicing	249	4.4	8.7e-42	3.3e-39
GOTERM_BP_FAT	regulation of RNA metabolic process	1451	25.5	1.3e-40	5e-38
GOTERM_BP_FAT	transcription, DNA-templated	1397	24.6	5.3e-40	1.9e-37
GOTERM_BP_FAT	cellular component biogenesis	1151	20.3	5.5e-36	1.9e-33
GOTERM_BP_FAT	RNA splicing, via transesterification reactions	195	3.4	1.1e-35	3.6e-33
GOTERM_BP_FAT	cellular macromolecule catabolic process	469	8.3	2.1e-35	6.9e-33
GOTERM_BP_FAT	regulation of nucleic acid-templated transcription	1380	24.3	7.7e-35	2.4e-32
GOTERM_BP_FAT	cellular macromolecule localization	700	12.3	8.6e-35	2.7e-32
GOTERM_BP_FAT	regulation of transcription, DNA-templated	1372	24.1	1.2e-34	3.5e-32
GOTERM_BP_FAT	cellular response to stress	756	13.3	1.2e-34	3.5e-32
GOTERM_BP_FAT	regulation of RNA biosynthetic process	1385	24.4	1.4e-34	3.9e-32
GOTERM_BP_FAT	RNA splicing, via transesterification reactions with bulged adenosine as nucleophile	191	3.4	2.5e-34	6.9e-32
GOTERM_BP_FAT	mRNA splicing, via spliceosome	191	3.4	2.5e-34	6.9e-32
GOTERM_BP_FAT	cellular protein localization	693	12.2	4.2e-34	1.1e-31
GOTERM_BP_FAT	posttranscriptional regulation of gene expression	265	4.7	1.8e-33	4.7e-31
GOTERM_BP_FAT	protein localization	977	17.2	7.1e-32	1.8e-29
GOTERM_BP_FAT	protein ubiquitination	379	6.7	3.2e-31	8.1e-29
GOTERM_BP_FAT	cellular protein modification process	1424	25.1	4.5e-31	1.1e-28
GOTERM_BP_FAT	protein modification process	1424	25.1	4.5e-31	1.1e-28
GOTERM_BP_FAT	macromolecule localization	1095	19.3	1.1e-30	2.7e-28
GOTERM_BP_FAT	macromolecule catabolic process	536	9.4	5.3e-30	1.2e-27
GOTERM_BP_FAT	cell cycle phase transition	287	5.1	1.9e-29	4.4e-27
GOTERM_BP_FAT	modification-dependent macromolecule catabolic process	305	5.4	2.7e-29	6e-27
GOTERM_BP_FAT	DNA metabolic process	458	8.1	3.5e-29	7.7e-27
GOTERM_BP_FAT	establishment of protein localization	820	14.4	5e-29	1.1e-26
GOTERM_BP_FAT	macromolecular complex assembly	712	12.5	8.4e-29	1.8e-26
GOTERM_BP_FAT	ubiquitin-dependent protein catabolic process	297	5.2	1.3e-28	2.7e-26
GOTERM_BP_FAT	modification-dependent protein catabolic process	300	5.3	1.5e-28	3.1e-26
GOTERM_BP_FAT	single-organism organelle organization	676	11.9	2.6e-28	5.1e-26
GOTERM_BP_FAT	mitotic cell cycle phase transition	271	4.8	2.9e-28	5.6e-26
GOTERM_BP_FAT	cellular response to DNA damage stimulus	385	6.8	2.9e-28	5.6e-26
GOTERM_BP_FAT	cellular component assembly	1017	17.9	4e-28	7.6e-26
GOTERM_BP_FAT	cellular protein catabolic process	339	6	6.5e-28	1.2e-25
GOTERM_BP_FAT	covalent chromatin modification	283	5	2.9e-27	5.3e-25
GOTERM_BP_FAT	peptidyl-lysine modification	225	4	3e-27	5.3e-25
GOTERM_BP_FAT	proteasomal protein catabolic process	223	3.9	4.3e-27	7.6e-25
GOTERM_BP_FAT	proteasome-mediated ubiquitin-dependent protein catabolic process	211	3.7	6e-27	1e-24
GOTERM_BP_FAT	ncRNA metabolic process	290	5.1	6.8e-27	1.2e-24
GOTERM_BP_FAT	ribonucleoprotein complex biogenesis	254	4.5	7.6e-27	1.3e-24
GOTERM_BP_FAT	protein localization to organelle	416	7.3	1e-26	1.7e-24
GOTERM_BP_FAT	proteolysis involved in cellular protein catabolic process	323	5.7	1.5e-26	2.5e-24
GOTERM_BP_FAT	protein catabolic process	381	6.7	2.3e-26	3.7e-24
GOTERM_BP_FAT	intracellular protein transport	456	8	1.1e-25	1.7e-23
GOTERM_BP_FAT	regulation of organelle organization	502	8.8	3.2e-25	5e-23
GOTERM_BP_FAT	protein transport	747	13.1	8.2e-25	1.3e-22
GOTERM_BP_FAT	mitotic nuclear division	229	4	1.4e-24	2.1e-22
GOTERM_BP_FAT	regulation of translation	192	3.4	3.1e-24	4.6e-22
GOTERM_BP_FAT	cell division	282	5	4.6e-23	6.8e-21
GOTERM_BP_FAT	regulation of cellular amide metabolic process	202	3.6	6.5e-23	9.5e-21
GOTERM_BP_FAT	DNA repair	264	4.6	7.6e-23	1.1e-20
GOTERM_BP_FAT	histone modification	228	4	1.3e-22	1.8e-20
GOTERM_BP_FAT	endomembrane system organization	274	4.8	2.2e-22	3e-20
GOTERM_BP_FAT	Golgi vesicle transport	178	3.1	2.5e-22	3.4e-20
GOTERM_BP_FAT	regulation of cell cycle	427	7.5	6.9e-22	9.4e-20
GOTERM_BP_FAT	chromosome segregation	182	3.2	2.7e-21	3.7e-19
GOTERM_BP_FAT	cellular macromolecular complex assembly	434	7.6	4.8e-21	6.3e-19
GOTERM_BP_FAT	protein polyubiquitination	147	2.6	4.9e-21	6.4e-19
GOTERM_BP_FAT	regulation of cellular component organization	884	15.6	4.9e-21	6.4e-19
GOTERM_BP_FAT	nuclear transport	237	4.2	5.1e-21	6.5e-19
GOTERM_BP_FAT	mitochondrion organization	305	5.4	9.2e-21	1.2e-18
GOTERM_BP_FAT	nucleocytoplasmic transport	233	4.1	1.1e-20	1.4e-18
GOTERM_BP_FAT	RNA localization	128	2.3	2e-20	2.5e-18
GOTERM_BP_FAT	sister chromatid segregation	133	2.3	4.8e-20	5.9e-18
GOTERM_BP_FAT	protein complex subunit organization	661	11.6	8.3e-20	1e-17
GOTERM_BP_FAT	nuclear export	115	2	1.3e-19	1.6e-17
GOTERM_BP_FAT	ribonucleoprotein complex subunit organization	131	2.3	3.3e-19	3.9e-17
GOTERM_BP_FAT	peptidyl-amino acid modification	489	8.6	8e-19	9.3e-17
GOTERM_BP_FAT	translation	294	5.2	1.1e-18	1.3e-16
GOTERM_BP_FAT	ribonucleoprotein complex assembly	125	2.2	1.5e-18	1.7e-16
GOTERM_BP_FAT	protein ubiquitination involved in ubiquitin-dependent protein catabolic process	129	2.3	2.2e-18	2.5e-16
GOTERM_BP_FAT	regulation of cell cycle process	276	4.9	2.2e-18	2.5e-16
GOTERM_BP_FAT	vacuolar transport	157	2.8	2.4e-18	2.7e-16
GOTERM_BP_FAT	chromatin organization	339	6	3.1e-18	3.5e-16
GOTERM_BP_FAT	regulation of mitotic cell cycle	236	4.2	4.1e-18	4.5e-16
GOTERM_BP_FAT	cellular catabolic process	633	11.1	4.5e-18	4.9e-16
GOTERM_BP_FAT	organelle fission	284	5	9.5e-18	1e-15
GOTERM_BP_FAT	regulation of mitotic cell cycle phase transition	165	2.9	9.7e-18	1e-15
GOTERM_BP_FAT	establishment of RNA localization	109	1.9	1.1e-17	1.1e-15
GOTERM_BP_FAT	mRNA transport	94	1.7	1.3e-17	1.3e-15
GOTERM_BP_FAT	nuclear division	269	4.7	1.4e-17	1.4e-15
GOTERM_BP_FAT	autophagy	206	3.6	2.1e-17	2.1e-15
GOTERM_BP_FAT	RNA transport	107	1.9	2.5e-17	2.5e-15
GOTERM_BP_FAT	nucleic acid transport	107	1.9	2.5e-17	2.5e-15
GOTERM_BP_FAT	peptide biosynthetic process	299	5.3	2.8e-17	2.7e-15
GOTERM_BP_FAT	protein sumoylation	87	1.5	5.3e-17	5.2e-15
GOTERM_BP_FAT	protein complex assembly	570	10	1.6e-16	1.1e-14
GOTERM_BP_FAT	regulation of chromosome organization	153	2.7	9.3e-17	1.1e-14
GOTERM_BP_FAT	ribonucleoprotein complex localization	83	1.5	7.8e-17	1.1e-14
GOTERM_BP_FAT	nuclear chromosome segregation	153	2.7	6.2e-17	1.1e-14
GOTERM_BP_FAT	amide biosynthetic process	322	5.7	2.2e-16	2.1e-14
GOTERM_BP_FAT	protein complex biogenesis	570	10	1.7e-16	2.1e-14
GOTERM_BP_FAT	establishment of protein localization to organelle	296	5.2	3.8e-16	3.1e-14
GOTERM_BP_FAT	nucleus organization	91	1.6	3.5e-16	3.1e-14
GOTERM_BP_FAT	regulation of cell cycle phase transition	171	3	5.1e-16	5.1e-14
GOTERM_BP_FAT	endosomal transport	136	2.4	6.5e-16	6e-14
GOTERM_BP_FAT	ncRNA processing	199	3.5	1.3e-15	1.2e-13
GOTERM_BP_FAT	nucleobase-containing compound transport	119	2.1	1.4e-15	1.3e-13
GOTERM_BP_FAT	regulation of protein catabolic process	183	3.2	1.6e-15	1.4e-13
GOTERM_BP_FAT	RNA export from nucleus	80	1.4	2.1e-15	1.8e-13
GOTERM_BP_FAT	cytosolic transport	89	1.6	2.6e-15	2.2e-13
GOTERM_BP_FAT	regulation of protein modification by small protein conjugation or removal	145	2.6	3.3e-15	2.8e-13
GOTERM_BP_FAT	viral process	398	7	5.7e-15	4.9e-13
GOTERM_BP_FAT	regulation of catabolic process	234	4.1	6.2e-15	5.3e-13
GOTERM_BP_FAT	mRNA-containing ribonucleoprotein complex export from nucleus	70	1.2	1.1e-14	9.5e-13
GOTERM_BP_FAT	mRNA export from nucleus	70	1.2	1.1e-14	9.5e-13
GOTERM_BP_FAT	multi-organism cellular process	399	7	1.2e-14	1e-12
GOTERM_BP_FAT	negative regulation of macromolecule metabolic process	851	15	1.2e-14	1e-12
GOTERM_BP_FAT	protein targeting	302	5.3	2.3e-14	1.9e-12
GOTERM_BP_FAT	positive regulation of protein modification by small protein conjugation or removal	111	2	2.5e-14	2e-12
GOTERM_BP_FAT	ribonucleoprotein complex export from nucleus	76	1.3	2.5e-14	2e-12
GOTERM_BP_FAT	regulation of protein metabolic process	908	16	4e-14	3.2e-12
GOTERM_BP_FAT	microtubule cytoskeleton organization	201	3.5	4.5e-14	3.6e-12
GOTERM_BP_FAT	regulation of cellular protein catabolic process	132	2.3	5.6e-14	4.4e-12
GOTERM_BP_FAT	regulation of mRNA stability	87	1.5	1.1e-13	8.8e-12
GOTERM_BP_FAT	regulation of RNA stability	90	1.6	1.2e-13	9.4e-12
GOTERM_BP_FAT	symbiosis, encompassing mutualism through parasitism	403	7.1	1.4e-13	1.1e-11
GOTERM_BP_FAT	interspecies interaction between organisms	403	7.1	1.4e-13	1.1e-11
GOTERM_BP_FAT	negative regulation of gene expression	568	10	1.5e-13	1.1e-11
GOTERM_BP_FAT	negative regulation of metabolic process	906	15.9	2.4e-13	1.9e-11
GOTERM_BP_FAT	transcription from RNA polymerase II promoter	676	11.9	4.8e-13	3.7e-11
GOTERM_BP_FAT	negative regulation of nitrogen compound metabolic process	572	10.1	5.1e-13	3.8e-11
GOTERM_BP_FAT	regulation of cellular protein metabolic process	847	14.9	5.2e-13	3.9e-11
GOTERM_BP_FAT	DNA replication	145	2.6	5.6e-13	4.1e-11
GOTERM_BP_FAT	microtubule-based process	267	4.7	5.7e-13	4.2e-11
GOTERM_BP_FAT	positive regulation of macromolecule metabolic process	1010	17.8	6.4e-13	4.7e-11
GOTERM_BP_FAT	regulation of proteolysis involved in cellular protein catabolic process	121	2.1	6.6e-13	4.8e-11
GOTERM_BP_FAT	cellular amide metabolic process	398	7	8.5e-13	6.1e-11
GOTERM_BP_FAT	negative regulation of translation	86	1.5	1.1e-12	8e-11
GOTERM_BP_FAT	G1/S transition of mitotic cell cycle	118	2.1	1.2e-12	8.2e-11
GOTERM_BP_FAT	nuclear envelope organization	58	1	1.2e-12	8.3e-11
GOTERM_BP_FAT	cell cycle G1/S phase transition	126	2.2	1.2e-12	8.3e-11
GOTERM_BP_FAT	regulation of cellular catabolic process	177	3.1	1.7e-12	1.2e-10
GOTERM_BP_FAT	regulation of protein ubiquitination	129	2.3	2e-12	1.4e-10
GOTERM_BP_FAT	peptide metabolic process	335	5.9	2.5e-12	1.8e-10
GOTERM_BP_FAT	regulation of autophagy	135	2.4	2.6e-12	1.8e-10
GOTERM_BP_FAT	positive regulation of organelle organization	258	4.5	2.7e-12	1.9e-10
GOTERM_BP_FAT	mitotic sister chromatid segregation	83	1.5	3.1e-12	2.1e-10
GOTERM_BP_FAT	single-organism cellular localization	432	7.6	3.3e-12	2.2e-10
GOTERM_BP_FAT	positive regulation of protein catabolic process	130	2.3	3.4e-12	2.3e-10
GOTERM_BP_FAT	regulation of mRNA metabolic process	79	1.4	3.5e-12	2.3e-10
GOTERM_BP_FAT	positive regulation of catabolic process	159	2.8	4.7e-12	3.1e-10
GOTERM_BP_FAT	regulation of DNA metabolic process	173	3	4.7e-12	3.1e-10
GOTERM_BP_FAT	positive regulation of cellular protein catabolic process	101	1.8	5.3e-12	3.5e-10
GOTERM_BP_FAT	regulation of cellular response to stress	250	4.4	5.6e-12	3.6e-10
GOTERM_BP_FAT	negative regulation of cellular amide metabolic process	88	1.5	5.8e-12	3.7e-10
GOTERM_BP_FAT	ER to Golgi vesicle-mediated transport	97	1.7	7.2e-12	4.6e-10
GOTERM_BP_FAT	positive regulation of protein ubiquitination	99	1.7	7.7e-12	4.9e-10
GOTERM_BP_FAT	sister chromatid cohesion	76	1.3	9.6e-12	6.1e-10
GOTERM_BP_FAT	spindle organization	68	1.2	1.1e-11	6.6e-10
GOTERM_BP_FAT	regulation of cellular protein localization	242	4.3	1.1e-11	7.2e-10
GOTERM_BP_FAT	positive regulation of proteolysis involved in cellular protein catabolic process	94	1.7	1.2e-11	7.7e-10
GOTERM_BP_FAT	vesicle-mediated transport	560	9.9	1.3e-11	8e-10
GOTERM_BP_FAT	retrograde vesicle-mediated transport, Golgi to ER	55	1	1.4e-11	8.4e-10
GOTERM_BP_FAT	cytoskeleton organization	443	7.8	1.4e-11	8.6e-10
GOTERM_BP_FAT	negative regulation of cellular macromolecule biosynthetic process	503	8.9	1.6e-11	9.7e-10
GOTERM_BP_FAT	ncRNA transcription	62	1.1	2.4e-11	1.4e-09
GOTERM_BP_FAT	cellular component disassembly	219	3.9	2.7e-11	1.6e-09
GOTERM_BP_FAT	DNA-templated transcription, elongation	71	1.2	3.7e-11	2.2e-09
GOTERM_BP_FAT	regulation of ubiquitin-protein transferase activity	71	1.2	3.7e-11	2.2e-09
GOTERM_BP_FAT	positive regulation of cellular catabolic process	133	2.3	3.9e-11	2.3e-09
GOTERM_BP_FAT	negative regulation of macromolecule biosynthetic process	532	9.4	4e-11	2.3e-09
GOTERM_BP_FAT	protein acylation	113	2	4.2e-11	2.5e-09
GOTERM_BP_FAT	RNA 3'-end processing	69	1.2	5e-11	2.9e-09
GOTERM_BP_FAT	protein localization to nucleus	167	2.9	5.6e-11	3.3e-09
GOTERM_BP_FAT	regulation of mRNA processing	64	1.1	6.1e-11	3.5e-09
GOTERM_BP_FAT	organelle localization	213	3.7	6.2e-11	3.6e-09
GOTERM_BP_FAT	peptidyl-lysine acetylation	89	1.6	7.4e-11	4.2e-09
GOTERM_BP_FAT	mRNA 3'-end processing	56	1	9.6e-11	5.4e-09
GOTERM_BP_FAT	positive regulation of cellular component organization	451	7.9	1.2e-10	6.9e-09
GOTERM_BP_FAT	positive regulation of ubiquitin-protein transferase activity	63	1.1	1.3e-10	7e-09
GOTERM_BP_FAT	positive regulation of cellular metabolic process	987	17.4	1.3e-10	7.1e-09
GOTERM_BP_FAT	DNA-dependent DNA replication	81	1.4	1.3e-10	7.2e-09
GOTERM_BP_FAT	protein acetylation	99	1.7	1.3e-10	7.3e-09
GOTERM_BP_FAT	internal peptidyl-lysine acetylation	83	1.5	1.4e-10	7.8e-09
GOTERM_BP_FAT	transcription elongation from RNA polymerase II promoter	60	1.1	1.9e-10	1.1e-08
GOTERM_BP_FAT	negative regulation of cellular metabolic process	828	14.6	2.2e-10	1.2e-08
GOTERM_BP_FAT	internal protein amino acid acetylation	85	1.5	2.4e-10	1.3e-08
GOTERM_BP_FAT	cell cycle checkpoint	114	2	2.8e-10	1.5e-08
GOTERM_BP_FAT	negative regulation of chromosome organization	65	1.1	2.8e-10	1.5e-08
GOTERM_BP_FAT	vacuole organization	108	1.9	3.1e-10	1.7e-08
GOTERM_BP_FAT	positive regulation of metabolic process	1051	18.5	3.2e-10	1.7e-08
GOTERM_BP_FAT	positive regulation of ubiquitin-protein ligase activity involved in regulation of mitotic cell cycle transition	50	0.9	3.7e-10	1.9e-08
GOTERM_BP_FAT	regulation of cellular response to heat	50	0.9	3.7e-10	1.9e-08
GOTERM_BP_FAT	histone acetylation	80	1.4	3.8e-10	2e-08
GOTERM_BP_FAT	Golgi organization	58	1	4.6e-10	2.4e-08
GOTERM_BP_FAT	tRNA metabolic process	96	1.7	5e-10	2.6e-08
GOTERM_BP_FAT	single-organism intracellular transport	282	5	5.1e-10	2.6e-08
GOTERM_BP_FAT	regulation of protein ubiquitination involved in ubiquitin-dependent protein catabolic process	61	1.1	5.2e-10	2.7e-08
GOTERM_BP_FAT	macroautophagy	103	1.8	5.7e-10	2.9e-08
GOTERM_BP_FAT	retrograde transport, endosome to Golgi	52	0.9	5.7e-10	2.9e-08
GOTERM_BP_FAT	organelle assembly	267	4.7	6.2e-10	3.2e-08
GOTERM_BP_FAT	anaphase-promoting complex-dependent catabolic process	51	0.9	6.4e-10	3.2e-08
GOTERM_BP_FAT	ribosome biogenesis	153	2.7	7.2e-10	3.6e-08
GOTERM_BP_FAT	membrane disassembly	36	0.6	7.8e-10	3.9e-08
GOTERM_BP_FAT	nuclear envelope disassembly	36	0.6	7.8e-10	3.9e-08
GOTERM_BP_FAT	gene silencing	122	2.1	8e-10	4e-08
GOTERM_BP_FAT	negative regulation of biosynthetic process	552	9.7	8.5e-10	4.2e-08
GOTERM_BP_FAT	membrane organization	394	6.9	8.7e-10	4.3e-08
GOTERM_BP_FAT	positive regulation of ubiquitin protein ligase activity	52	0.9	1.1e-09	5.3e-08
GOTERM_BP_FAT	positive regulation of protein ubiquitination involved in ubiquitin-dependent protein catabolic process	56	1	1.1e-09	5.5e-08
GOTERM_BP_FAT	positive regulation of nitrogen compound metabolic process	636	11.2	1.5e-09	7.4e-08
GOTERM_BP_FAT	negative regulation of protein modification process	239	4.2	1.6e-09	7.8e-08
GOTERM_BP_FAT	positive regulation of nucleobase-containing compound metabolic process	600	10.6	1.8e-09	8.8e-08
GOTERM_BP_FAT	regulation of organelle assembly	85	1.5	1.8e-09	8.9e-08
GOTERM_BP_FAT	regulation of protein stability	111	2	2.5e-09	1.2e-07
GOTERM_BP_FAT	spliceosomal snRNP assembly	30	0.5	3.9e-09	1.9e-07
GOTERM_BP_FAT	spliceosomal complex assembly	39	0.7	4.1e-09	1.9e-07
GOTERM_BP_FAT	in utero embryonic development	149	2.6	4.1e-09	1.9e-07
GOTERM_BP_FAT	nucleotide-excision repair	66	1.2	4.7e-09	2.2e-07
GOTERM_BP_FAT	protein import	148	2.6	4.9e-09	2.3e-07
GOTERM_BP_FAT	establishment of organelle localization	181	3.2	5e-09	2.3e-07
GOTERM_BP_FAT	DNA-templated transcription, termination	60	1.1	5.1e-09	2.4e-07
GOTERM_BP_FAT	negative regulation of cellular biosynthetic process	539	9.5	5.2e-09	2.4e-07
GOTERM_BP_FAT	regulation of transcription from RNA polymerase II promoter	654	11.5	5.4e-09	2.5e-07
GOTERM_BP_FAT	gene silencing by RNA	83	1.5	5.8e-09	2.7e-07
GOTERM_BP_FAT	protein deacetylation	56	1	5.9e-09	2.7e-07
GOTERM_BP_FAT	rRNA metabolic process	128	2.3	6.3e-09	2.9e-07
GOTERM_BP_FAT	regulation of cellular localization	324	5.7	6.8e-09	3.1e-07
GOTERM_BP_FAT	protein deacylation	58	1	7.1e-09	3.2e-07
GOTERM_BP_FAT	posttranscriptional gene silencing by RNA	41	0.7	7.3e-09	3.3e-07
GOTERM_BP_FAT	posttranscriptional gene silencing	41	0.7	7.3e-09	3.3e-07
GOTERM_BP_FAT	regulation of ubiquitin-protein ligase activity involved in mitotic cell cycle	46	0.8	8.1e-09	3.6e-07
GOTERM_BP_FAT	positive regulation of RNA metabolic process	516	9.1	9.6e-09	4.3e-07
GOTERM_BP_FAT	regulation of cellular component biogenesis	314	5.5	1e-08	4.5e-07
GOTERM_BP_FAT	regulation of ubiquitin protein ligase activity	52	0.9	1.1e-08	4.9e-07
GOTERM_BP_FAT	macromolecule deacylation	58	1	1.2e-08	5.2e-07
GOTERM_BP_FAT	negative regulation of nucleobase-containing compound metabolic process	501	8.8	1.2e-08	5.2e-07
GOTERM_BP_FAT	RNA catabolic process	117	2.1	1.2e-08	5.2e-07
GOTERM_BP_FAT	positive regulation of macromolecule biosynthetic process	574	10.1	1.4e-08	6.1e-07
GOTERM_BP_FAT	histone deacetylation	50	0.9	1.5e-08	6.6e-07
GOTERM_BP_FAT	protein folding	109	1.9	1.7e-08	7.2e-07
GOTERM_BP_FAT	rRNA processing	124	2.2	1.7e-08	7.4e-07
GOTERM_BP_FAT	negative regulation of ubiquitin-protein ligase activity involved in mitotic cell cycle	45	0.8	1.7e-08	7.4e-07
GOTERM_BP_FAT	negative regulation of ubiquitin-protein transferase activity	49	0.9	1.8e-08	7.5e-07
GOTERM_BP_FAT	nuclear import	135	2.4	1.9e-08	7.9e-07
GOTERM_BP_FAT	double-strand break repair	100	1.8	2e-08	8.4e-07
GOTERM_BP_FAT	tRNA-containing ribonucleoprotein complex export from nucleus	26	0.5	2.1e-08	8.8e-07
GOTERM_BP_FAT	tRNA export from nucleus	26	0.5	2.1e-08	8.8e-07
GOTERM_BP_FAT	single-organism membrane organization	332	5.8	2.2e-08	9.4e-07
GOTERM_BP_FAT	microtubule organizing center organization	67	1.2	2.3e-08	9.7e-07
GOTERM_BP_FAT	DNA duplex unwinding	47	0.8	2.4e-08	9.9e-07
GOTERM_BP_FAT	tRNA transport	27	0.5	2.4e-08	9.9e-07
GOTERM_BP_FAT	DNA integrity checkpoint	81	1.4	2.6e-08	1.1e-06
GOTERM_BP_FAT	regulation of translational initiation	50	0.9	2.6e-08	1.1e-06
GOTERM_BP_FAT	spindle assembly	53	0.9	2.7e-08	1.1e-06
GOTERM_BP_FAT	mitotic nuclear envelope disassembly	32	0.6	2.8e-08	1.1e-06
GOTERM_BP_FAT	RNA polyadenylation	30	0.5	2.8e-08	1.1e-06
GOTERM_BP_FAT	regulation of RNA splicing	61	1.1	2.9e-08	1.2e-06
GOTERM_BP_FAT	DNA geometric change	49	0.9	3.1e-08	1.2e-06
GOTERM_BP_FAT	cellular protein complex assembly	232	4.1	3.4e-08	1.4e-06
GOTERM_BP_FAT	negative regulation of protein ubiquitination	69	1.2	3.7e-08	1.5e-06
GOTERM_BP_FAT	gene silencing by miRNA	38	0.7	4e-08	1.6e-06
GOTERM_BP_FAT	positive regulation of gene expression	601	10.6	4.4e-08	1.8e-06
GOTERM_BP_FAT	positive regulation of proteolysis	155	2.7	4.8e-08	1.9e-06
GOTERM_BP_FAT	Wnt signaling pathway	194	3.4	4.9e-08	2e-06
GOTERM_BP_FAT	regulation of chromatin organization	81	1.4	5.2e-08	2.1e-06
GOTERM_BP_FAT	regulation of protein complex assembly	163	2.9	5.5e-08	2.2e-06
GOTERM_BP_FAT	negative regulation of protein modification by small protein conjugation or removal	73	1.3	5.6e-08	2.2e-06
GOTERM_BP_FAT	negative regulation of ubiquitin protein ligase activity	45	0.8	5.7e-08	2.2e-06
GOTERM_BP_FAT	intra-Golgi vesicle-mediated transport	34	0.6	5.7e-08	2.2e-06
GOTERM_BP_FAT	cell-cell signaling by wnt	194	3.4	6e-08	2.3e-06
GOTERM_BP_FAT	DNA damage checkpoint	76	1.3	6.6e-08	2.5e-06
GOTERM_BP_FAT	response to endoplasmic reticulum stress	122	2.1	7e-08	2.7e-06
GOTERM_BP_FAT	mRNA polyadenylation	29	0.5	6.9e-08	2.7e-06
GOTERM_BP_FAT	positive regulation of RNA biosynthetic process	495	8.7	7.1e-08	2.7e-06
GOTERM_BP_FAT	DNA recombination	119	2.1	9.3e-08	3.5e-06
GOTERM_BP_FAT	regulation of gene expression, epigenetic	119	2.1	1.2e-07	4.5e-06
GOTERM_BP_FAT	mitochondrial transport	124	2.2	1.3e-07	5e-06
GOTERM_BP_FAT	snRNA transcription from RNA polymerase II promoter	43	0.8	1.4e-07	5.1e-06
GOTERM_BP_FAT	snRNA transcription	43	0.8	1.4e-07	5.1e-06
GOTERM_BP_FAT	regulation of chromosome segregation	49	0.9	1.5e-07	5.6e-06
GOTERM_BP_FAT	cell cycle G2/M phase transition	94	1.7	1.5e-07	5.6e-06
GOTERM_BP_FAT	mRNA catabolic process	103	1.8	1.6e-07	5.9e-06
GOTERM_BP_FAT	negative regulation of cellular protein metabolic process	369	6.5	1.6e-07	6e-06
GOTERM_BP_FAT	macromolecular complex disassembly	118	2.1	1.8e-07	6.8e-06
GOTERM_BP_FAT	membrane budding	58	1	1.9e-07	6.9e-06
GOTERM_BP_FAT	negative regulation of mitotic cell cycle	102	1.8	1.9e-07	6.9e-06
GOTERM_BP_FAT	negative regulation of protein metabolic process	387	6.8	2.1e-07	7.8e-06
GOTERM_BP_FAT	phosphorus metabolic process	1036	18.2	2.3e-07	8.3e-06
GOTERM_BP_FAT	positive regulation of chromosome organization	75	1.3	2.3e-07	8.3e-06
GOTERM_BP_FAT	regulation of histone modification	69	1.2	2.5e-07	9e-06
GOTERM_BP_FAT	telomere maintenance	69	1.2	2.5e-07	9e-06
GOTERM_BP_FAT	regulation of protein modification process	586	10.3	2.6e-07	9.4e-06
GOTERM_BP_FAT	establishment or maintenance of cell polarity	83	1.5	2.6e-07	9.4e-06
GOTERM_BP_FAT	protein localization to mitochondrion	91	1.6	2.6e-07	9.5e-06
GOTERM_BP_FAT	phosphate-containing compound metabolic process	1033	18.2	2.8e-07	9.9e-06
GOTERM_BP_FAT	centrosome organization	60	1.1	3e-07	1.1e-05
GOTERM_BP_FAT	protein K48-linked ubiquitination	32	0.6	3e-07	1.1e-05
GOTERM_BP_FAT	positive regulation of nucleic acid-templated transcription	484	8.5	3e-07	1.1e-05
GOTERM_BP_FAT	positive regulation of transcription, DNA-templated	484	8.5	3e-07	1.1e-05
GOTERM_BP_FAT	regulation of DNA-templated transcription, elongation	31	0.5	3.2e-07	1.1e-05
GOTERM_BP_FAT	dephosphorylation	175	3.1	3.3e-07	1.2e-05
GOTERM_BP_FAT	negative regulation of cell cycle	191	3.4	3.4e-07	1.2e-05
GOTERM_BP_FAT	transcription-coupled nucleotide-excision repair	44	0.8	3.4e-07	1.2e-05
GOTERM_BP_FAT	nuclear-transcribed mRNA catabolic process	96	1.7	4.3e-07	1.5e-05
GOTERM_BP_FAT	macromolecule methylation	118	2.1	4.8e-07	1.7e-05
GOTERM_BP_FAT	vesicle targeting	45	0.8	4.9e-07	1.7e-05
GOTERM_BP_FAT	negative regulation of RNA metabolic process	447	7.9	4.9e-07	1.7e-05
GOTERM_BP_FAT	negative regulation of mitotic cell cycle phase transition	76	1.3	5.2e-07	1.8e-05
GOTERM_BP_FAT	G2/M transition of mitotic cell cycle	87	1.5	5.6e-07	1.9e-05
GOTERM_BP_FAT	multi-organism cellular localization	41	0.7	5.6e-07	1.9e-05
GOTERM_BP_FAT	multi-organism intracellular transport	41	0.7	5.6e-07	1.9e-05
GOTERM_BP_FAT	positive regulation of protein metabolic process	533	9.4	6e-07	2.1e-05
GOTERM_BP_FAT	protein dephosphorylation	114	2	6e-07	2.1e-05
GOTERM_BP_FAT	regulation of mitochondrion organization	104	1.8	6.4e-07	2.2e-05
GOTERM_BP_FAT	regulation of macroautophagy	64	1.1	6.4e-07	2.2e-05
GOTERM_BP_FAT	positive regulation of cellular protein metabolic process	504	8.9	7.1e-07	2.4e-05
GOTERM_BP_FAT	RNA secondary structure unwinding	30	0.5	7.4e-07	2.5e-05
GOTERM_BP_FAT	protein complex disassembly	112	2	8.6e-07	2.9e-05
GOTERM_BP_FAT	negative regulation of organelle organization	134	2.4	8.7e-07	2.9e-05
GOTERM_BP_FAT	regulation of DNA repair	47	0.8	8.9e-07	3e-05
GOTERM_BP_FAT	stimulatory C-type lectin receptor signaling pathway	56	1	9.3e-07	3.1e-05
GOTERM_BP_FAT	protein import into nucleus	122	2.1	9.5e-07	3.1e-05
GOTERM_BP_FAT	protein targeting to nucleus	122	2.1	9.5e-07	3.1e-05
GOTERM_BP_FAT	histone mRNA metabolic process	22	0.4	9.7e-07	3.2e-05
GOTERM_BP_FAT	establishment of protein localization to mitochondrion	88	1.5	1.1e-06	3.6e-05
GOTERM_BP_FAT	intracellular transport of virus	40	0.7	1.1e-06	3.7e-05
GOTERM_BP_FAT	regulation of sister chromatid segregation	40	0.7	1.1e-06	3.7e-05
GOTERM_BP_FAT	multi-organism localization	43	0.8	1.1e-06	3.7e-05
GOTERM_BP_FAT	multi-organism transport	43	0.8	1.1e-06	3.7e-05
GOTERM_BP_FAT	protein alkylation	80	1.4	1.1e-06	3.7e-05
GOTERM_BP_FAT	protein methylation	80	1.4	1.1e-06	3.7e-05
GOTERM_BP_FAT	methylation	141	2.5	1.1e-06	3.7e-05
GOTERM_BP_FAT	cell surface receptor signaling pathway involved in cell-cell signaling	208	3.7	1.2e-06	3.8e-05
GOTERM_BP_FAT	single-organism nuclear import	122	2.1	1.2e-06	3.8e-05
GOTERM_BP_FAT	antigen processing and presentation of exogenous peptide antigen	78	1.4	1.2e-06	4e-05
GOTERM_BP_FAT	positive regulation of cellular biosynthetic process	601	10.6	1.3e-06	4.1e-05
GOTERM_BP_FAT	viral life cycle	183	3.2	1.3e-06	4.3e-05
GOTERM_BP_FAT	nuclear-transcribed mRNA catabolic process, deadenylation-dependent decay	42	0.7	1.3e-06	4.3e-05
GOTERM_BP_FAT	snRNA metabolic process	47	0.8	1.4e-06	4.5e-05
GOTERM_BP_FAT	regulation of mitophagy	30	0.5	1.5e-06	4.7e-05
GOTERM_BP_FAT	organonitrogen compound biosynthetic process	487	8.6	1.5e-06	4.7e-05
GOTERM_BP_FAT	regulation of proteasomal protein catabolic process	72	1.3	1.5e-06	4.8e-05
GOTERM_BP_FAT	regulation of mRNA splicing, via spliceosome	41	0.7	1.6e-06	5e-05
GOTERM_BP_FAT	transport of virus	41	0.7	1.6e-06	5e-05
GOTERM_BP_FAT	multi-organism metabolic process	97	1.7	1.7e-06	5.5e-05
GOTERM_BP_FAT	regulation of transferase activity	350	6.2	1.8e-06	5.5e-05
GOTERM_BP_FAT	regulation of response to DNA damage stimulus	76	1.3	1.8e-06	5.6e-05
GOTERM_BP_FAT	negative regulation of cell cycle phase transition	79	1.4	1.8e-06	5.7e-05
GOTERM_BP_FAT	chromatin remodeling	79	1.4	1.8e-06	5.7e-05
GOTERM_BP_FAT	telomere maintenance via telomere lengthening	37	0.7	1.8e-06	5.7e-05
GOTERM_BP_FAT	DNA biosynthetic process	92	1.6	2e-06	6.2e-05
GOTERM_BP_FAT	innate immune response activating cell surface receptor signaling pathway	56	1	2e-06	6.2e-05
GOTERM_BP_FAT	regulation of telomere maintenance via telomere lengthening	32	0.6	2.2e-06	6.7e-05
GOTERM_BP_FAT	positive regulation of cellular protein localization	150	2.6	2.2e-06	6.8e-05
GOTERM_BP_FAT	regulation of transcription elongation from RNA polymerase II promoter	20	0.4	2.3e-06	7.1e-05
GOTERM_BP_FAT	mitotic cell cycle checkpoint	76	1.3	2.4e-06	7.3e-05
GOTERM_BP_FAT	dsRNA fragmentation	24	0.4	2.4e-06	7.4e-05
GOTERM_BP_FAT	production of small RNA involved in gene silencing by RNA	24	0.4	2.4e-06	7.4e-05
GOTERM_BP_FAT	positive regulation of biosynthetic process	608	10.7	2.6e-06	7.9e-05
GOTERM_BP_FAT	regulation of G1/S transition of mitotic cell cycle	69	1.2	2.7e-06	8e-05
GOTERM_BP_FAT	regulation of intracellular transport	187	3.3	3.2e-06	9.7e-05
GOTERM_BP_FAT	telomere organization	71	1.2	3.4e-06	0.0001
GOTERM_BP_FAT	negative regulation of DNA metabolic process	59	1	3.4e-06	0.0001
GOTERM_BP_FAT	protein monoubiquitination	33	0.6	3.5e-06	0.0001
GOTERM_BP_FAT	tRNA aminoacylation	33	0.6	3.5e-06	0.0001
GOTERM_BP_FAT	vesicle organization	125	2.2	3.9e-06	0.00011
GOTERM_BP_FAT	negative regulation of cellular component organization	238	4.2	4e-06	0.00012
GOTERM_BP_FAT	mitotic sister chromatid separation	32	0.6	4e-06	0.00012
GOTERM_BP_FAT	antigen processing and presentation of exogenous antigen	79	1.4	4.3e-06	0.00013
GOTERM_BP_FAT	intracellular steroid hormone receptor signaling pathway	63	1.1	4.4e-06	0.00013
GOTERM_BP_FAT	COPII-coated vesicle budding	38	0.7	4.4e-06	0.00013
GOTERM_BP_FAT	negative regulation of cell cycle process	105	1.8	4.6e-06	0.00013
GOTERM_BP_FAT	regulation of mitotic sister chromatid segregation	34	0.6	5.2e-06	0.00015
GOTERM_BP_FAT	phosphorylation	753	13.3	5.4e-06	0.00016
GOTERM_BP_FAT	production of miRNAs involved in gene silencing by miRNA	23	0.4	5.8e-06	0.00017
GOTERM_BP_FAT	ATP-dependent chromatin remodeling	44	0.8	5.9e-06	0.00017
GOTERM_BP_FAT	regulation of cellular amino acid metabolic process	33	0.6	6.1e-06	0.00018
GOTERM_BP_FAT	amino acid activation	33	0.6	6.1e-06	0.00018
GOTERM_BP_FAT	Ras protein signal transduction	133	2.3	6.1e-06	0.00018
GOTERM_BP_FAT	microtubule cytoskeleton organization involved in mitosis	29	0.5	6.2e-06	0.00018
GOTERM_BP_FAT	histone H4 acetylation	36	0.6	6.2e-06	0.00018
GOTERM_BP_FAT	viral gene expression	87	1.5	6.4e-06	0.00018
GOTERM_BP_FAT	protein stabilization	66	1.2	6.4e-06	0.00018
GOTERM_BP_FAT	chromosome separation	41	0.7	6.6e-06	0.00019
GOTERM_BP_FAT	histone methylation	64	1.1	6.9e-06	0.00019
GOTERM_BP_FAT	regulation of signal transduction by p53 class mediator	76	1.3	7.5e-06	0.00021
GOTERM_BP_FAT	regulation of molecular function	949	16.7	8e-06	0.00023
GOTERM_BP_FAT	intracellular signal transduction	885	15.6	8.1e-06	0.00023
GOTERM_BP_FAT	tRNA aminoacylation for protein translation	31	0.5	8.3e-06	0.00023
GOTERM_BP_FAT	autophagosome organization	37	0.7	8.6e-06	0.00024
GOTERM_BP_FAT	termination of RNA polymerase II transcription	37	0.7	8.6e-06	0.00024
GOTERM_BP_FAT	positive regulation of cell cycle	139	2.4	8.6e-06	0.00024
GOTERM_BP_FAT	negative regulation of nucleic acid-templated transcription	417	7.3	8.8e-06	0.00025
GOTERM_BP_FAT	regulation of dephosphorylation	69	1.2	8.9e-06	0.00025
GOTERM_BP_FAT	negative regulation of transcription from RNA polymerase II promoter	277	4.9	9.6e-06	0.00026
GOTERM_BP_FAT	positive regulation of molecular function	628	11.1	9.8e-06	0.00027
GOTERM_BP_FAT	negative regulation of mRNA metabolic process	25	0.4	1e-05	0.00028
GOTERM_BP_FAT	autophagosome assembly	36	0.6	1e-05	0.00028
GOTERM_BP_FAT	cytoplasmic translational initiation	15	0.3	1.1e-05	0.00029
GOTERM_BP_FAT	negative regulation of ERBB signaling pathway	29	0.5	1.1e-05	0.00031
GOTERM_BP_FAT	NIK/NF-kappaB signaling	54	1	1.2e-05	0.00034
GOTERM_BP_FAT	mitotic spindle assembly	28	0.5	1.3e-05	0.00036
GOTERM_BP_FAT	DNA-templated transcription, initiation	100	1.8	1.4e-05	0.00037
GOTERM_BP_FAT	translational elongation	65	1.1	1.4e-05	0.00038
GOTERM_BP_FAT	actin cytoskeleton organization	211	3.7	1.4e-05	0.00038
GOTERM_BP_FAT	apoptotic signaling pathway	221	3.9	1.5e-05	0.00039
GOTERM_BP_FAT	microtubule nucleation	17	0.3	1.4e-05	0.00039
GOTERM_BP_FAT	protein localization to vacuole	31	0.5	1.4e-05	0.00039
GOTERM_BP_FAT	transcription from RNA polymerase III promoter	31	0.5	1.4e-05	0.00039
GOTERM_BP_FAT	metaphase/anaphase transition of mitotic cell cycle	27	0.5	1.5e-05	0.0004
GOTERM_BP_FAT	histone lysine methylation	51	0.9	1.6e-05	0.00042
GOTERM_BP_FAT	non-canonical Wnt signaling pathway	72	1.3	1.6e-05	0.00042
GOTERM_BP_FAT	vesicle coating	36	0.6	1.6e-05	0.00044
GOTERM_BP_FAT	regulation of mitotic sister chromatid separation	30	0.5	1.7e-05	0.00045
GOTERM_BP_FAT	establishment of protein localization to plasma membrane	67	1.2	1.7e-05	0.00046
GOTERM_BP_FAT	negative regulation of RNA biosynthetic process	420	7.4	1.9e-05	0.00049
GOTERM_BP_FAT	regulation of cell cycle G1/S phase transition	71	1.2	1.9e-05	0.00049
GOTERM_BP_FAT	establishment of cell polarity	48	0.8	2e-05	0.00051
GOTERM_BP_FAT	positive regulation of viral life cycle	48	0.8	2e-05	0.00051
GOTERM_BP_FAT	lysosomal transport	42	0.7	2e-05	0.00051
GOTERM_BP_FAT	centrosome cycle	42	0.7	2e-05	0.00051
GOTERM_BP_FAT	vesicle targeting, rough ER to cis-Golgi	35	0.6	2e-05	0.00051
GOTERM_BP_FAT	COPII vesicle coating	35	0.6	2e-05	0.00051
GOTERM_BP_FAT	negative regulation of transcription, DNA-templated	399	7	2e-05	0.00053
GOTERM_BP_FAT	positive regulation of catalytic activity	536	9.4	2.1e-05	0.00054
GOTERM_BP_FAT	positive regulation of transferase activity	239	4.2	2.1e-05	0.00055
GOTERM_BP_FAT	mitochondrial translation	58	1	2.1e-05	0.00055
GOTERM_BP_FAT	protein localization to Golgi apparatus	24	0.4	2.2e-05	0.00058
GOTERM_BP_FAT	negative regulation of G1/S transition of mitotic cell cycle	49	0.9	2.3e-05	0.00059
GOTERM_BP_FAT	negative regulation of epidermal growth factor receptor signaling pathway	28	0.5	2.3e-05	0.0006
GOTERM_BP_FAT	regulation of telomere maintenance via telomerase	28	0.5	2.3e-05	0.0006
GOTERM_BP_FAT	tRNA processing	59	1	2.4e-05	0.00061
GOTERM_BP_FAT	intrinsic apoptotic signaling pathway	116	2	2.5e-05	0.00062
GOTERM_BP_FAT	microtubule polymerization	31	0.5	2.5e-05	0.00063
GOTERM_BP_FAT	protein K63-linked ubiquitination	27	0.5	2.7e-05	0.0007
GOTERM_BP_FAT	antigen processing and presentation of peptide antigen	80	1.4	2.8e-05	0.00072
GOTERM_BP_FAT	cytokinesis	58	1	2.9e-05	0.00073
GOTERM_BP_FAT	metaphase/anaphase transition of cell cycle	30	0.5	2.9e-05	0.00073
GOTERM_BP_FAT	chordate embryonic development	217	3.8	3.1e-05	0.00078
GOTERM_BP_FAT	transcription initiation from RNA polymerase II promoter	78	1.4	3.2e-05	0.0008
GOTERM_BP_FAT	positive regulation of protein complex assembly	96	1.7	3.3e-05	0.00082
GOTERM_BP_FAT	regulation of establishment of planar polarity	54	1	3.3e-05	0.00083
GOTERM_BP_FAT	antigen processing and presentation of exogenous peptide antigen via MHC class II	47	0.8	3.4e-05	0.00084
GOTERM_BP_FAT	endoplasmic reticulum organization	29	0.5	3.4e-05	0.00086
GOTERM_BP_FAT	positive regulation of proteasomal protein catabolic process	45	0.8	3.5e-05	0.00086
GOTERM_BP_FAT	ephrin receptor signaling pathway	45	0.8	3.5e-05	0.00086
GOTERM_BP_FAT	histone ubiquitination	25	0.4	3.7e-05	0.00092
GOTERM_BP_FAT	positive regulation of mitochondrion organization	77	1.4	3.8e-05	0.00093
GOTERM_BP_FAT	formation of translation preinitiation complex	18	0.3	3.8e-05	0.00093
GOTERM_BP_FAT	establishment of protein localization to membrane	146	2.6	3.8e-05	0.00093
GOTERM_BP_FAT	cytoskeleton-dependent intracellular transport	48	0.8	3.9e-05	0.00097
GOTERM_BP_FAT	nucleobase-containing compound catabolic process	150	2.6	4e-05	0.00097
GOTERM_BP_FAT	vesicle targeting, to, from or within Golgi	36	0.6	4e-05	0.00098
GOTERM_BP_FAT	mitotic recombination	28	0.5	4.1e-05	0.00099
GOTERM_BP_FAT	negative regulation of chromatin organization	28	0.5	4.1e-05	0.00099
GOTERM_BP_FAT	chromosome localization	38	0.7	4.2e-05	0.001
GOTERM_BP_FAT	embryo development ending in birth or egg hatching	218	3.8	4.5e-05	0.0011
GOTERM_BP_FAT	peptidyl-lysine methylation	54	1	4.6e-05	0.0011
GOTERM_BP_FAT	protein targeting to mitochondrion	66	1.2	4.7e-05	0.0011
GOTERM_BP_FAT	morphogenesis of a polarized epithelium	63	1.1	4.8e-05	0.0012
GOTERM_BP_FAT	regulation of binding	122	2.1	4.9e-05	0.0012
GOTERM_BP_FAT	transcription from RNA polymerase I promoter	32	0.6	5.4e-05	0.0013
GOTERM_BP_FAT	protein export from nucleus	32	0.6	5.4e-05	0.0013
GOTERM_BP_FAT	antigen processing and presentation of peptide antigen via MHC class II	48	0.8	5.5e-05	0.0013
GOTERM_BP_FAT	telomere maintenance via recombination	22	0.4	5.6e-05	0.0013
GOTERM_BP_FAT	protein localization to plasma membrane	89	1.6	5.7e-05	0.0013
GOTERM_BP_FAT	positive regulation of viral transcription	26	0.5	5.7e-05	0.0013
GOTERM_BP_FAT	nucleic acid phosphodiester bond hydrolysis	114	2	5.8e-05	0.0014
GOTERM_BP_FAT	response to ionizing radiation	66	1.2	6.1e-05	0.0014
GOTERM_BP_FAT	DNA conformation change	116	2	6.1e-05	0.0014
GOTERM_BP_FAT	regulation of proteasomal ubiquitin-dependent protein catabolic process	54	1	6.2e-05	0.0015
GOTERM_BP_FAT	regulation of protein localization	341	6	6.2e-05	0.0015
GOTERM_BP_FAT	negative regulation of intracellular signal transduction	174	3.1	6.3e-05	0.0015
GOTERM_BP_FAT	negative regulation of mRNA processing	21	0.4	6.3e-05	0.0015
GOTERM_BP_FAT	response to UV	60	1.1	6.3e-05	0.0015
GOTERM_BP_FAT	positive regulation of apoptotic signaling pathway	78	1.4	6.4e-05	0.0015
GOTERM_BP_FAT	positive regulation of DNA metabolic process	87	1.5	6.4e-05	0.0015
GOTERM_BP_FAT	negative regulation of transferase activity	141	2.5	6.6e-05	0.0015
GOTERM_BP_FAT	positive regulation of viral process	52	0.9	6.7e-05	0.0015
GOTERM_BP_FAT	Wnt signaling pathway, planar cell polarity pathway	52	0.9	6.7e-05	0.0015
GOTERM_BP_FAT	regulation of signal transduction	896	15.8	6.8e-05	0.0016
GOTERM_BP_FAT	regulation of mitotic metaphase/anaphase transition	28	0.5	6.9e-05	0.0016
GOTERM_BP_FAT	small GTPase mediated signal transduction	198	3.5	7.5e-05	0.0017
GOTERM_BP_FAT	establishment of chromosome localization	37	0.7	7.6e-05	0.0017
GOTERM_BP_FAT	transmembrane receptor protein tyrosine kinase signaling pathway	238	4.2	7.7e-05	0.0018
GOTERM_BP_FAT	plasma membrane organization	113	2	8.1e-05	0.0019
GOTERM_BP_FAT	cap-independent translational initiation	13	0.2	8.2e-05	0.0019
GOTERM_BP_FAT	ERBB signaling pathway	67	1.2	8.5e-05	0.0019
GOTERM_BP_FAT	negative regulation of cell cycle G1/S phase transition	49	0.9	8.7e-05	0.002
GOTERM_BP_FAT	protein localization to cell periphery	95	1.7	8.7e-05	0.002
GOTERM_BP_FAT	positive regulation of autophagy	42	0.7	8.9e-05	0.002
GOTERM_BP_FAT	nuclear-transcribed mRNA poly(A) tail shortening	23	0.4	9.1e-05	0.002
GOTERM_BP_FAT	negative regulation of TOR signaling	23	0.4	9.1e-05	0.002
GOTERM_BP_FAT	positive regulation of DNA-templated transcription, elongation	17	0.3	9.1e-05	0.0021
GOTERM_BP_FAT	mitochondrial membrane organization	50	0.9	9.8e-05	0.0022
GOTERM_BP_FAT	regulation of glucose transport	50	0.9	9.8e-05	0.0022
GOTERM_BP_FAT	signal transduction in response to DNA damage	56	1	0.0001	0.0023
GOTERM_BP_FAT	mitochondrial RNA metabolic process	22	0.4	0.00011	0.0024
GOTERM_BP_FAT	negative regulation of dephosphorylation	41	0.7	0.00011	0.0024
GOTERM_BP_FAT	establishment of tissue polarity	57	1	0.00011	0.0025
GOTERM_BP_FAT	establishment of planar polarity	57	1	0.00011	0.0025
GOTERM_BP_FAT	post-Golgi vesicle-mediated transport	35	0.6	0.00011	0.0025
GOTERM_BP_FAT	regulation of metaphase/anaphase transition of cell cycle	28	0.5	0.00011	0.0025
GOTERM_BP_FAT	cytoskeleton-dependent cytokinesis	25	0.4	0.00012	0.0026
GOTERM_BP_FAT	regulation of catalytic activity	778	13.7	0.00012	0.0026
GOTERM_BP_FAT	global genome nucleotide-excision repair	21	0.4	0.00012	0.0027
GOTERM_BP_FAT	telomere maintenance via telomerase	30	0.5	0.00012	0.0027
GOTERM_BP_FAT	regulation of intracellular protein transport	145	2.6	0.00013	0.0028
GOTERM_BP_FAT	regulation of nucleocytoplasmic transport	90	1.6	0.00013	0.0029
GOTERM_BP_FAT	regulation of telomere maintenance	36	0.6	0.00014	0.003
GOTERM_BP_FAT	7-methylguanosine RNA capping	24	0.4	0.00014	0.003
GOTERM_BP_FAT	RNA capping	24	0.4	0.00014	0.003
GOTERM_BP_FAT	antigen processing and presentation of peptide or polysaccharide antigen via MHC class II	48	0.8	0.00014	0.0031
GOTERM_BP_FAT	protein polymerization	101	1.8	0.00015	0.0033
GOTERM_BP_FAT	positive regulation of histone modification	41	0.7	0.00015	0.0033
GOTERM_BP_FAT	T cell receptor signaling pathway	73	1.3	0.00015	0.0033
GOTERM_BP_FAT	viral transcription	78	1.4	0.00016	0.0034
GOTERM_BP_FAT	regulation of cytoskeleton organization	161	2.8	0.00016	0.0034
GOTERM_BP_FAT	rRNA transcription	19	0.3	0.00016	0.0034
GOTERM_BP_FAT	negative regulation of histone modification	23	0.4	0.00016	0.0035
GOTERM_BP_FAT	mitotic metaphase plate congression	23	0.4	0.00016	0.0035
GOTERM_BP_FAT	blastocyst development	35	0.6	0.00017	0.0035
GOTERM_BP_FAT	regulation of protein localization to nucleus	91	1.6	0.00017	0.0036
GOTERM_BP_FAT	protein localization to membrane	183	3.2	0.00018	0.0039
GOTERM_BP_FAT	RNA modification	60	1.1	0.00018	0.0039
GOTERM_BP_FAT	positive regulation of Wnt signaling pathway	68	1.2	0.00019	0.0039
GOTERM_BP_FAT	nucleoside monophosphate metabolic process	123	2.2	0.00019	0.0039
GOTERM_BP_FAT	spliceosomal tri-snRNP complex assembly	11	0.2	0.00019	0.004
GOTERM_BP_FAT	regulation of membrane permeability	38	0.7	0.00019	0.0041
GOTERM_BP_FAT	regulation of ERBB signaling pathway	43	0.8	0.0002	0.0042
GOTERM_BP_FAT	protein-DNA complex subunit organization	106	1.9	0.0002	0.0042
GOTERM_BP_FAT	cellular respiration	75	1.3	0.00021	0.0044
GOTERM_BP_FAT	cellular response to topologically incorrect protein	66	1.2	0.00021	0.0044
GOTERM_BP_FAT	positive regulation of chromosome segregation	16	0.3	0.00022	0.0045
GOTERM_BP_FAT	positive regulation of cell cycle process	102	1.8	0.00022	0.0046
GOTERM_BP_FAT	mitotic cytokinesis	21	0.4	0.00022	0.0046
GOTERM_BP_FAT	Arp2/3 complex-mediated actin nucleation	21	0.4	0.00022	0.0046
GOTERM_BP_FAT	7-methylguanosine mRNA capping	21	0.4	0.00022	0.0046
GOTERM_BP_FAT	positive regulation of transcription elongation from RNA polymerase II promoter	12	0.2	0.00022	0.0046
GOTERM_BP_FAT	vascular endothelial growth factor receptor signaling pathway	44	0.8	0.00023	0.0047
GOTERM_BP_FAT	spindle localization	24	0.4	0.00023	0.0048
GOTERM_BP_FAT	mitotic G1 DNA damage checkpoint	37	0.7	0.00023	0.0048
GOTERM_BP_FAT	lamellipodium organization	37	0.7	0.00023	0.0048
GOTERM_BP_FAT	mitotic G1/S transition checkpoint	37	0.7	0.00023	0.0048
GOTERM_BP_FAT	protein autoubiquitination	29	0.5	0.00023	0.0048
GOTERM_BP_FAT	regulation of histone methylation	33	0.6	0.00024	0.005
GOTERM_BP_FAT	Fc receptor signaling pathway	99	1.7	0.00024	0.005
GOTERM_BP_FAT	RNA phosphodiester bond hydrolysis	61	1.1	0.00025	0.0051
GOTERM_BP_FAT	regulation of DNA replication	54	1	0.00025	0.0051
GOTERM_BP_FAT	regulation of DNA biosynthetic process	45	0.8	0.00025	0.0052
GOTERM_BP_FAT	regulation of Wnt signaling pathway	124	2.2	0.00026	0.0052
GOTERM_BP_FAT	peptidyl-threonine phosphorylation	40	0.7	0.00026	0.0052
GOTERM_BP_FAT	Golgi to vacuole transport	20	0.4	0.00026	0.0053
GOTERM_BP_FAT	heterocycle catabolic process	156	2.7	0.00026	0.0053
GOTERM_BP_FAT	cellular protein complex disassembly	82	1.4	0.00027	0.0055
GOTERM_BP_FAT	epidermal growth factor receptor signaling pathway	55	1	0.00027	0.0055
GOTERM_BP_FAT	regulation of plasma membrane organization	38	0.7	0.00027	0.0055
GOTERM_BP_FAT	cell cycle arrest	96	1.7	0.00027	0.0055
GOTERM_BP_FAT	modulation by virus of host morphology or physiology	23	0.4	0.00028	0.0055
GOTERM_BP_FAT	toxin transport	23	0.4	0.00028	0.0055
GOTERM_BP_FAT	cellular response to dsRNA	28	0.5	0.00028	0.0056
GOTERM_BP_FAT	regulation of mitochondrial membrane permeability	36	0.6	0.00028	0.0057
GOTERM_BP_FAT	negative regulation of signal transduction	376	6.6	0.00028	0.0057
GOTERM_BP_FAT	signal transduction involved in DNA damage checkpoint	34	0.6	0.00029	0.0058
GOTERM_BP_FAT	signal transduction involved in DNA integrity checkpoint	34	0.6	0.00029	0.0058
GOTERM_BP_FAT	positive regulation of protein modification process	393	6.9	0.0003	0.0059
GOTERM_BP_FAT	cellular nitrogen compound catabolic process	158	2.8	0.0003	0.0059
GOTERM_BP_FAT	mitotic DNA integrity checkpoint	50	0.9	0.00031	0.0061
GOTERM_BP_FAT	TOR signaling	39	0.7	0.00031	0.0062
GOTERM_BP_FAT	regulation of protein deacetylation	22	0.4	0.00033	0.0065
GOTERM_BP_FAT	G1 DNA damage checkpoint	37	0.7	0.00033	0.0065
GOTERM_BP_FAT	regulation of mitotic nuclear division	62	1.1	0.00033	0.0066
GOTERM_BP_FAT	metaphase plate congression	27	0.5	0.00034	0.0067
GOTERM_BP_FAT	ribosomal small subunit biogenesis	35	0.6	0.00034	0.0067
GOTERM_BP_FAT	microtubule polymerization or depolymerization	40	0.7	0.00036	0.0069
GOTERM_BP_FAT	intracellular protein transmembrane transport	29	0.5	0.00036	0.0069
GOTERM_BP_FAT	histone H3 acetylation	31	0.5	0.00036	0.007
GOTERM_BP_FAT	positive regulation of cellular component biogenesis	165	2.9	0.00038	0.0075
GOTERM_BP_FAT	peptidyl-threonine modification	41	0.7	0.0004	0.0078
GOTERM_BP_FAT	regulation of epidermal growth factor receptor signaling pathway	41	0.7	0.0004	0.0078
GOTERM_BP_FAT	regulation of cell cycle arrest	50	0.9	0.0004	0.0078
GOTERM_BP_FAT	mitotic DNA damage checkpoint	47	0.8	0.00041	0.0079
GOTERM_BP_FAT	positive regulation of translation	47	0.8	0.00041	0.0079
GOTERM_BP_FAT	regulation of viral transcription	34	0.6	0.00042	0.0081
GOTERM_BP_FAT	signal transduction involved in cell cycle checkpoint	34	0.6	0.00042	0.0081
GOTERM_BP_FAT	regulation of cilium assembly	32	0.6	0.00043	0.0083
GOTERM_BP_FAT	regulation of gene silencing	32	0.6	0.00043	0.0083
GOTERM_BP_FAT	protein transmembrane transport	32	0.6	0.00043	0.0083
GOTERM_BP_FAT	NLS-bearing protein import into nucleus	16	0.3	0.00045	0.0087
GOTERM_BP_FAT	DNA-dependent DNA replication maintenance of fidelity	20	0.4	0.00046	0.0089
GOTERM_BP_FAT	protein targeting to vacuole	20	0.4	0.00046	0.0089
GOTERM_BP_FAT	regulation of protein binding	75	1.3	0.00047	0.0091
GOTERM_BP_FAT	ribonucleoside monophosphate metabolic process	116	2	0.0005	0.0096
GOTERM_BP_FAT	regulation of mRNA 3'-end processing	15	0.3	0.0005	0.0096
GOTERM_BP_FAT	cell death	646	11.4	0.00053	0.01
GOTERM_BP_FAT	regulation of microtubule cytoskeleton organization	54	1	0.00054	0.01
GOTERM_BP_FAT	positive regulation of cell cycle arrest	41	0.7	0.00054	0.01
GOTERM_BP_FAT	negative regulation of sister chromatid segregation	22	0.4	0.00055	0.01
GOTERM_BP_FAT	establishment of vesicle localization	97	1.7	0.00055	0.01
GOTERM_BP_FAT	regulation of chromatin binding	14	0.2	0.00055	0.01
GOTERM_BP_FAT	histone H2A ubiquitination	14	0.2	0.00055	0.01
GOTERM_BP_FAT	apoptotic process	580	10.2	0.00056	0.011
GOTERM_BP_FAT	positive regulation of apoptotic process	207	3.6	0.00057	0.011
GOTERM_BP_FAT	vesicle localization	101	1.8	0.00058	0.011
GOTERM_BP_FAT	positive regulation of cell projection organization	118	2.1	0.00059	0.011
GOTERM_BP_FAT	pore complex assembly	13	0.2	0.00059	0.011
GOTERM_BP_FAT	endosome organization	34	0.6	0.00059	0.011
GOTERM_BP_FAT	positive regulation of chromatin organization	42	0.7	0.0006	0.011
GOTERM_BP_FAT	regulation of double-strand break repair	24	0.4	0.0006	0.011
GOTERM_BP_FAT	mitochondrial RNA processing	12	0.2	0.00061	0.011
GOTERM_BP_FAT	RNA interference	12	0.2	0.00061	0.011
GOTERM_BP_FAT	organelle transport along microtubule	32	0.6	0.00062	0.011
GOTERM_BP_FAT	response to topologically incorrect protein	78	1.4	0.00063	0.012
GOTERM_BP_FAT	modification by symbiont of host morphology or physiology	26	0.5	0.00064	0.012
GOTERM_BP_FAT	positive regulation of mitochondrial membrane permeability	30	0.5	0.00064	0.012
GOTERM_BP_FAT	regulation of establishment of protein localization to mitochondrion	57	1	0.00064	0.012
GOTERM_BP_FAT	regulation of gene silencing by RNA	18	0.3	0.00064	0.012
GOTERM_BP_FAT	regulation of posttranscriptional gene silencing	18	0.3	0.00064	0.012
GOTERM_BP_FAT	positive regulation of cell death	218	3.8	0.00065	0.012
GOTERM_BP_FAT	vacuole fusion	21	0.4	0.00066	0.012
GOTERM_BP_FAT	establishment of spindle localization	21	0.4	0.00066	0.012
GOTERM_BP_FAT	endoplasmic reticulum unfolded protein response	58	1	0.00067	0.012
GOTERM_BP_FAT	regulation of phosphatase activity	50	0.9	0.00068	0.012
GOTERM_BP_FAT	negative regulation of phosphatase activity	35	0.6	0.00068	0.012
GOTERM_BP_FAT	positive regulation of programmed cell death	208	3.7	0.00069	0.013
GOTERM_BP_FAT	intracellular receptor signaling pathway	103	1.8	0.0007	0.013
GOTERM_BP_FAT	insulin receptor signaling pathway	51	0.9	0.00072	0.013
GOTERM_BP_FAT	signal transduction by p53 class mediator	70	1.2	0.00073	0.013
GOTERM_BP_FAT	negative regulation of phosphate metabolic process	197	3.5	0.00074	0.013
GOTERM_BP_FAT	negative regulation of phosphorus metabolic process	197	3.5	0.00074	0.013
GOTERM_BP_FAT	purine ribonucleoside monophosphate metabolic process	111	2	0.00075	0.014
GOTERM_BP_FAT	regulation of histone deacetylation	17	0.3	0.00075	0.014
GOTERM_BP_FAT	retrograde transport, vesicle recycling within Golgi	17	0.3	0.00075	0.014
GOTERM_BP_FAT	positive regulation of proteasomal ubiquitin-dependent protein catabolic process	36	0.6	0.00077	0.014
GOTERM_BP_FAT	positive regulation of establishment of protein localization to mitochondrion	52	0.9	0.00077	0.014
GOTERM_BP_FAT	androgen receptor signaling pathway	29	0.5	0.00078	0.014
GOTERM_BP_FAT	cellular response to organic cyclic compound	189	3.3	0.00078	0.014
GOTERM_BP_FAT	establishment of protein localization to vacuole	20	0.4	0.00079	0.014
GOTERM_BP_FAT	programmed cell death	611	10.8	0.00079	0.014
GOTERM_BP_FAT	regulation of microtubule-based process	62	1.1	0.00081	0.014
GOTERM_BP_FAT	regulation of cell projection assembly	69	1.2	0.00085	0.015
GOTERM_BP_FAT	ERAD pathway	43	0.8	0.00087	0.015
GOTERM_BP_FAT	purine nucleoside monophosphate metabolic process	111	2	0.00087	0.015
GOTERM_BP_FAT	negative regulation of autophagy	32	0.6	0.00087	0.015
GOTERM_BP_FAT	signal transduction involved in mitotic cell cycle checkpoint	32	0.6	0.00087	0.015
GOTERM_BP_FAT	signal transduction involved in mitotic DNA integrity checkpoint	32	0.6	0.00087	0.015
GOTERM_BP_FAT	intracellular signal transduction involved in G1 DNA damage checkpoint	32	0.6	0.00087	0.015
GOTERM_BP_FAT	signal transduction involved in mitotic DNA damage checkpoint	32	0.6	0.00087	0.015
GOTERM_BP_FAT	signal transduction involved in mitotic G1 DNA damage checkpoint	32	0.6	0.00087	0.015
GOTERM_BP_FAT	negative regulation of chromosome segregation	22	0.4	0.00088	0.016
GOTERM_BP_FAT	tRNA modification	35	0.6	0.00093	0.016
GOTERM_BP_FAT	cell cycle DNA replication	19	0.3	0.00094	0.017
GOTERM_BP_FAT	autophagosome maturation	19	0.3	0.00094	0.017
GOTERM_BP_FAT	maturation of SSU-rRNA	26	0.5	0.00095	0.017
GOTERM_BP_FAT	activation of GTPase activity	38	0.7	0.00096	0.017
GOTERM_BP_FAT	regulation of protein localization to plasma membrane	33	0.6	0.001	0.017
GOTERM_BP_FAT	nucleus localization	15	0.3	0.001	0.018
GOTERM_BP_FAT	ATP metabolic process	96	1.7	0.001	0.018
GOTERM_BP_FAT	regulation of cellular amine metabolic process	36	0.6	0.001	0.018
GOTERM_BP_FAT	regulation of cell projection organization	205	3.6	0.0011	0.018
GOTERM_BP_FAT	mRNA splice site selection	18	0.3	0.0011	0.019
GOTERM_BP_FAT	nucleotide-excision repair, preincision complex assembly	18	0.3	0.0011	0.019
GOTERM_BP_FAT	aromatic compound catabolic process	156	2.7	0.0011	0.02
GOTERM_BP_FAT	microtubule anchoring	14	0.2	0.0012	0.02
GOTERM_BP_FAT	positive regulation of protein deacetylation	14	0.2	0.0012	0.02
GOTERM_BP_FAT	organelle disassembly	37	0.7	0.0012	0.02
GOTERM_BP_FAT	steroid hormone mediated signaling pathway	74	1.3	0.0012	0.02
GOTERM_BP_FAT	RNA-dependent DNA biosynthetic process	32	0.6	0.0012	0.021
GOTERM_BP_FAT	translational initiation	77	1.4	0.0013	0.022
GOTERM_BP_FAT	cell-cell junction organization	87	1.5	0.0013	0.022
GOTERM_BP_FAT	protein localization to cytoskeleton	20	0.4	0.0013	0.022
GOTERM_BP_FAT	regulation of protein export from nucleus	20	0.4	0.0013	0.022
GOTERM_BP_FAT	regulation of early endosome to late endosome transport	13	0.2	0.0013	0.022
GOTERM_BP_FAT	cellular response to unfolded protein	58	1	0.0013	0.022
GOTERM_BP_FAT	regulation of cell morphogenesis	203	3.6	0.0013	0.022
GOTERM_BP_FAT	antigen processing and presentation	90	1.6	0.0013	0.022
GOTERM_BP_FAT	negative regulation of RNA splicing	17	0.3	0.0013	0.023
GOTERM_BP_FAT	protein K11-linked ubiquitination	17	0.3	0.0013	0.023
GOTERM_BP_FAT	modulation by symbiont of host cellular process	17	0.3	0.0013	0.023
GOTERM_BP_FAT	establishment of spindle orientation	17	0.3	0.0013	0.023
GOTERM_BP_FAT	positive regulation of mitotic cell cycle	54	1	0.0014	0.023
GOTERM_BP_FAT	regulation of protein localization to cell periphery	33	0.6	0.0014	0.023
GOTERM_BP_FAT	spindle checkpoint	22	0.4	0.0014	0.023
GOTERM_BP_FAT	intracellular protein transmembrane import	24	0.4	0.0014	0.024
GOTERM_BP_FAT	positive regulation of histone deacetylation	12	0.2	0.0014	0.024
GOTERM_BP_FAT	negative regulation of telomere maintenance via telomere lengthening	12	0.2	0.0014	0.024
GOTERM_BP_FAT	nuclear migration	9	0.2	0.0015	0.025
GOTERM_BP_FAT	DNA damage response, signal transduction by p53 class mediator resulting in cell cycle arrest	31	0.5	0.0015	0.025
GOTERM_BP_FAT	negative regulation of cell communication	398	7	0.0015	0.025
GOTERM_BP_FAT	regulation of apoptotic signaling pathway	141	2.5	0.0015	0.025
GOTERM_BP_FAT	histone mRNA catabolic process	11	0.2	0.0015	0.025
GOTERM_BP_FAT	establishment of nucleus localization	11	0.2	0.0015	0.025
GOTERM_BP_FAT	purine nucleoside metabolic process	134	2.4	0.0015	0.025
GOTERM_BP_FAT	purine ribonucleoside metabolic process	133	2.3	0.0015	0.025
GOTERM_BP_FAT	DNA strand elongation	19	0.3	0.0016	0.026
GOTERM_BP_FAT	IRES-dependent translational initiation	10	0.2	0.0016	0.026
GOTERM_BP_FAT	maturation of LSU-rRNA	16	0.3	0.0016	0.026
GOTERM_BP_FAT	establishment of mitotic spindle localization	16	0.3	0.0016	0.026
GOTERM_BP_FAT	establishment of localization by movement along microtubule	45	0.8	0.0017	0.028
GOTERM_BP_FAT	nucleotide-excision repair, DNA incision, 5'-to lesion	21	0.4	0.0017	0.028
GOTERM_BP_FAT	ribonucleoside triphosphate metabolic process	105	1.8	0.0017	0.028
GOTERM_BP_FAT	regulation of TOR signaling	35	0.6	0.0017	0.028
GOTERM_BP_FAT	centrosome duplication	25	0.4	0.0017	0.028
GOTERM_BP_FAT	histone H3-K4 methylation	25	0.4	0.0017	0.028
GOTERM_BP_FAT	base-excision repair	23	0.4	0.0017	0.028
GOTERM_BP_FAT	nucleoside triphosphate metabolic process	113	2	0.0017	0.028
GOTERM_BP_FAT	positive regulation of neuron projection development	90	1.6	0.0018	0.029
GOTERM_BP_FAT	protein localization to chromosome	30	0.5	0.0018	0.029
GOTERM_BP_FAT	regulation of mitochondrial membrane permeability involved in apoptotic process	30	0.5	0.0018	0.029
GOTERM_BP_FAT	recombinational repair	39	0.7	0.0018	0.03
GOTERM_BP_FAT	DNA damage response, signal transduction by p53 class mediator	47	0.8	0.0019	0.03
GOTERM_BP_FAT	nuclear DNA replication	15	0.3	0.0019	0.03
GOTERM_BP_FAT	establishment of protein localization to Golgi	15	0.3	0.0019	0.03
GOTERM_BP_FAT	ribonucleoside metabolic process	142	2.5	0.0019	0.031
GOTERM_BP_FAT	regulation of vesicle-mediated transport	163	2.9	0.0019	0.031
GOTERM_BP_FAT	regulation of viral process	101	1.8	0.0019	0.031
GOTERM_BP_FAT	regulation of cell communication	965	17	0.0019	0.031
GOTERM_BP_FAT	positive regulation of mitochondrial membrane permeability involved in apoptotic process	28	0.5	0.0019	0.031
GOTERM_BP_FAT	mitochondrial outer membrane permeabilization involved in programmed cell death	28	0.5	0.0019	0.031
GOTERM_BP_FAT	protein modification by small protein removal	64	1.1	0.0019	0.031
GOTERM_BP_FAT	negative regulation of signaling	398	7	0.002	0.032
GOTERM_BP_FAT	mitochondrial respiratory chain complex I biogenesis	31	0.5	0.002	0.032
GOTERM_BP_FAT	antigen processing and presentation of exogenous peptide antigen via MHC class I, TAP-dependent	31	0.5	0.002	0.032
GOTERM_BP_FAT	mitochondrial respiratory chain complex I assembly	31	0.5	0.002	0.032
GOTERM_BP_FAT	NADH dehydrogenase complex assembly	31	0.5	0.002	0.032
GOTERM_BP_FAT	nucleoside metabolic process	151	2.7	0.002	0.032
GOTERM_BP_FAT	negative regulation of mitotic sister chromatid segregation	20	0.4	0.002	0.032
GOTERM_BP_FAT	regulation of protein dephosphorylation	34	0.6	0.0021	0.033
GOTERM_BP_FAT	regulation of centrosome cycle	24	0.4	0.0021	0.033
GOTERM_BP_FAT	mitochondrial respiratory chain complex assembly	41	0.7	0.0021	0.034
GOTERM_BP_FAT	negative regulation of ERK1 and ERK2 cascade	29	0.5	0.0022	0.035
GOTERM_BP_FAT	nucleotide-excision repair, preincision complex stabilization	14	0.2	0.0022	0.035
GOTERM_BP_FAT	negative regulation of mRNA splicing, via spliceosome	14	0.2	0.0022	0.035
GOTERM_BP_FAT	response to unfolded protein	70	1.2	0.0022	0.035
GOTERM_BP_FAT	regulation of signaling	979	17.2	0.0022	0.035
GOTERM_BP_FAT	actin filament organization	125	2.2	0.0022	0.035
GOTERM_BP_FAT	positive regulation of cellular amide metabolic process	51	0.9	0.0023	0.035
GOTERM_BP_FAT	replication fork processing	17	0.3	0.0023	0.035
GOTERM_BP_FAT	early endosome to late endosome transport	17	0.3	0.0023	0.035
GOTERM_BP_FAT	cellular response to endogenous stimulus	397	7	0.0023	0.036
GOTERM_BP_FAT	positive regulation of organelle assembly	27	0.5	0.0023	0.037
GOTERM_BP_FAT	cytoplasmic translation	27	0.5	0.0023	0.037
GOTERM_BP_FAT	negative regulation of response to DNA damage stimulus	27	0.5	0.0023	0.037
GOTERM_BP_FAT	negative regulation of cellular protein catabolic process	25	0.4	0.0025	0.038
GOTERM_BP_FAT	negative regulation of mitotic metaphase/anaphase transition	19	0.3	0.0025	0.039
GOTERM_BP_FAT	mitotic spindle checkpoint	19	0.3	0.0025	0.039
GOTERM_BP_FAT	transcription initiation from RNA polymerase I promoter	19	0.3	0.0025	0.039
GOTERM_BP_FAT	regulation of cell cycle checkpoint	19	0.3	0.0025	0.039
GOTERM_BP_FAT	negative regulation of mitotic sister chromatid separation	19	0.3	0.0025	0.039
GOTERM_BP_FAT	cell junction organization	96	1.7	0.0025	0.039
GOTERM_BP_FAT	response to radiation	152	2.7	0.0025	0.039
GOTERM_BP_FAT	intracellular estrogen receptor signaling pathway	23	0.4	0.0025	0.039
GOTERM_BP_FAT	cellular response to nerve growth factor stimulus	21	0.4	0.0026	0.04
GOTERM_BP_FAT	corticosteroid receptor signaling pathway	13	0.2	0.0026	0.04
GOTERM_BP_FAT	cytoplasmic mRNA processing body assembly	13	0.2	0.0026	0.04
GOTERM_BP_FAT	cell aging	41	0.7	0.0027	0.042
GOTERM_BP_FAT	endocytic recycling	16	0.3	0.0027	0.042
GOTERM_BP_FAT	negative regulation of telomere maintenance	16	0.3	0.0027	0.042
GOTERM_BP_FAT	DNA strand elongation involved in DNA replication	16	0.3	0.0027	0.042
GOTERM_BP_FAT	microtubule-based movement	88	1.5	0.0027	0.042
GOTERM_BP_FAT	regulation of protein polymerization	73	1.3	0.0027	0.042
GOTERM_BP_FAT	double-strand break repair via homologous recombination	38	0.7	0.0029	0.044
GOTERM_BP_FAT	cellular response to decreased oxygen levels	58	1	0.0029	0.044
GOTERM_BP_FAT	negative regulation of cellular protein localization	58	1	0.0029	0.044
GOTERM_BP_FAT	glucocorticoid receptor signaling pathway	12	0.2	0.003	0.045
GOTERM_BP_FAT	non-recombinational repair	35	0.6	0.003	0.045
GOTERM_BP_FAT	glycosyl compound metabolic process	157	2.8	0.003	0.045
GOTERM_BP_FAT	vesicle-mediated transport to the plasma membrane	18	0.3	0.003	0.046
GOTERM_BP_FAT	termination of RNA polymerase I transcription	18	0.3	0.003	0.046
GOTERM_BP_FAT	transcription elongation from RNA polymerase I promoter	18	0.3	0.003	0.046
GOTERM_BP_FAT	vesicle-mediated transport between endosomal compartments	18	0.3	0.003	0.046
GOTERM_BP_FAT	regulation of vacuole organization	24	0.4	0.003	0.046
GOTERM_BP_FAT	mitochondrial translational termination	39	0.7	0.0031	0.046
GOTERM_BP_FAT	nucleotide-excision repair, DNA incision	22	0.4	0.0031	0.047
GOTERM_BP_FAT	RNA phosphodiester bond hydrolysis, exonucleolytic	20	0.4	0.0031	0.047
GOTERM_BP_FAT	mRNA stabilization	20	0.4	0.0031	0.047
GOTERM_BP_FAT	DNA damage response, detection of DNA damage	20	0.4	0.0031	0.047
GOTERM_BP_FAT	mitochondrial outer membrane permeabilization	27	0.5	0.0033	0.049
GOTERM_BP_FAT	negative regulation of protein phosphorylation	143	2.5	0.0033	0.049
GOTERM_BP_FAT	misfolded or incompletely synthesized protein catabolic process	15	0.3	0.0033	0.049
GOTERM_BP_FAT	modulation by virus of host process	15	0.3	0.0033	0.049
GOTERM_BP_FAT	histone H4-K16 acetylation	15	0.3	0.0033	0.049

[truncated: 21 more sheets: Cluster 2_CMes, Cluster 3_CMes, Cluster 4_CMes, Cluster 1_CP, Cluster 2_CP, Cluster 3_CP, Cluster 4_CP, Cluster 1_CM, Cluster 2_CM, Cluste 3_CM, Cluster 4_CM, iPSC v M, iPSC up, iPSC v M, M up, M v CMes, M up, M v CMes, CMes up, CMes v CP, CMes up, CMes v CP, CP up, CP v CM, CP up, CP v CM, CM up, Genes in Amount Patterns …]
