# Supplementary material for: Dynamic tissue-specific H2Bub1 is required for human and mouse cardiogenesis
Source: Research Square preprint supplement (doi:10.21203/rs.3.rs-1498907/v1), 2022-04-01
Supplement: Supplementary file 5 [file 88db9df3a856411aea4b11cd.xlsx]

## Sheet: Cluster Identities
Chromosome	Start	End	Name	Cluster
chr1	201283451	201332993	NM_000299	Cluster1
chr1	67092165	67134970	NM_001276351	Cluster1
chr1	67092165	67134970	NM_001276352	Cluster1
chr1	201283505	201332989	NM_001005337	Cluster1
chr1	67092165	67134970	NR_075077	Cluster1
chr1	8352403	8817640	NM_001042681	Cluster1
chr1	41847188	42035934	NR_038261	Cluster1
chr1	8352403	8423832	NM_001042682	Cluster1
chr1	33513998	34165842	NM_052896	Cluster1
chr1	8352403	8817640	NM_012102	Cluster1
chr1	33513997	34165230	NM_001281956	Cluster1
chr1	75202128	75611114	NM_001320285	Cluster1
chr1	75202128	75611114	NM_001130058	Cluster1
chr1	75202128	75611114	NM_001320287	Cluster1
chr1	75204474	75611114	NM_152697	Cluster1
chr1	75204474	75616163	NM_001320283	Cluster1
chr1	83865023	83999132	NM_001350214	Cluster1
chr1	83865023	83999132	NM_001350215	Cluster1
chr1	83865023	83999132	NM_024686	Cluster1
chr1	167721981	167791919	NM_001146191	Cluster1
chr1	167721981	167791919	NM_024569	Cluster1
chr1	184387028	184629019	NM_030806	Cluster1
chr1	150982291	150995633	NM_003568	Cluster1
chr1	192935743	192948257	NR_126003	Cluster1
chr1	175944825	176207244	NM_001001740	Cluster1
chr1	167721981	167791919	NM_003953	Cluster1
chr1	175944830	176207286	NM_022457	Cluster1
chr1	175944825	176207244	NM_001286644	Cluster1
chr1	243256004	243500092	NM_001350246	Cluster1
chr1	209661358	209724125	NR_134509	Cluster1
chr1	209661358	209742562	NR_134510	Cluster1
chr1	209686179	209734950	NM_181755	Cluster1
chr1	243256004	243500092	NM_001350249	Cluster1
chr1	243256004	243500092	NM_001350251	Cluster1
chr1	243256004	243500092	NM_001350247	Cluster1
chr1	243256004	243500092	NM_001350248	Cluster1
chr1	209704845	209734928	NM_005525	Cluster1
chr1	209686179	209734950	NM_001206741	Cluster1
chr1	1020119	1056114	NM_198576	Cluster1
chr1	6264271	6385768	NM_181864	Cluster1
chr1	3069202	3438621	NM_022114	Cluster1
chr1	2073461	2185399	NM_001033581	Cluster1
chr1	2073461	2185399	NM_001350806	Cluster1
chr1	2073985	2185399	NM_001350805	Cluster1
chr1	1033992	1056114	NM_001364727	Cluster1
chr1	3069202	3438621	NM_199454	Cluster1
chr1	2073985	2185399	NM_001242874	Cluster1
chr1	2050410	2185395	NM_002744	Cluster1
chr1	6264271	6393766	NM_007274	Cluster1
chr1	2073461	2185399	NM_001350804	Cluster1
chr1	2073461	2185399	NM_001350803	Cluster1
chr1	1020119	1056114	NM_001305275	Cluster1
chr1	6264271	6360714	NM_181865	Cluster1
chr1	6264271	6358929	NM_181866	Cluster1
chr1	2073461	2185399	NR_146911	Cluster1
chr1	10474949	10630758	NM_004565	Cluster1
chr1	12567909	12618210	NM_004753	Cluster1
chr1	11479154	11537551	NM_020780	Cluster1
chr1	12567909	12616789	NM_001319225	Cluster1
chr1	15684319	15734769	NM_015164	Cluster1
chr1	12567909	12596613	NM_001324370	Cluster1
chr1	14598684	15118043	NM_201628	Cluster1
chr1	14598716	15068155	NM_015209	Cluster1
chr1	14598684	15068155	NM_001370230	Cluster1
chr1	20806291	21176897	NM_001198801	Cluster1
chr1	18871429	18902799	NM_001319218	Cluster1
chr1	20806291	21176897	NM_001198802	Cluster1
chr1	18871429	18902555	NM_003748	Cluster1
chr1	23019467	23083689	NM_015013	Cluster1
chr1	20941244	21168039	NM_001198803	Cluster1
chr1	18871429	18890891	NM_001161504	Cluster1
chr1	20806291	21111383	NM_003760	Cluster1
chr1	17755332	17827063	NM_030812	Cluster1
chr1	18871429	18902555	NM_170726	Cluster1
chr1	23019467	23083689	NM_001009999	Cluster1
chr1	23019467	23083689	NM_001363654	Cluster1
chr1	27234631	27308636	NM_015023	Cluster1
chr1	27234631	27308636	NM_001276252	Cluster1
chr1	39841030	39883511	NR_132401	Cluster1
chr1	39841030	39883511	NR_132402	Cluster1
chr1	39841030	39883511	NR_132403	Cluster1
chr1	39841030	39883511	NR_132404	Cluster1
chr1	39841030	39883511	NR_132405	Cluster1
chr1	39841030	39883511	NR_132406	Cluster1
chr1	39841030	39883511	NR_132407	Cluster1
chr1	39841030	39883511	NR_132408	Cluster1
chr1	39841030	39883511	NR_132409	Cluster1
chr1	39841030	39883511	NR_132410	Cluster1
chr1	39841030	39883511	NR_132412	Cluster1
chr1	39841030	39883511	NR_132413	Cluster1
chr1	39841030	39883511	NR_132414	Cluster1
chr1	39841030	39883511	NR_132415	Cluster1
chr1	39841030	39883511	NM_001312692	Cluster1
chr1	39841030	39883511	NM_001312691	Cluster1
chr1	37715975	37765120	NM_001099439	Cluster1
chr1	39838109	39883504	NM_017646	Cluster1
chr1	48532853	50023954	NM_032785	Cluster1
chr1	48532853	50023954	NR_136623	Cluster1
chr1	46040139	46176488	NM_001303427	Cluster1
chr1	46040139	46174901	NM_001328648	Cluster1
chr1	48222715	48248638	NM_001135181	Cluster1
chr1	48532853	50023954	NM_001323573	Cluster1
chr1	48532853	50023954	NM_001323574	Cluster1
chr1	48222715	48248638	NM_001011547	Cluster1
chr1	48532853	50023954	NM_001323575	Cluster1
chr1	52423275	52553090	NM_015269	Cluster1
chr1	57143998	58250547	NM_001353980	Cluster1
chr1	51354262	51422095	NM_001159969	Cluster1
chr1	52423275	52553092	NM_001009881	Cluster1
chr1	56994777	58250503	NM_021080	Cluster1
chr1	60659630	60825584	NR_110628	Cluster1
chr1	65992615	66374579	NM_001037340	Cluster1
chr1	64833228	65067746	NM_001321852	Cluster1
chr1	63774016	64181496	NM_005012	Cluster1
chr1	64833228	65067746	NM_001321853	Cluster1
chr1	65792509	66374579	NM_001037341	Cluster1
chr1	64833228	65067746	NM_001321854	Cluster1
chr1	65913244	66374579	NM_001297441	Cluster1
chr1	65792509	66374579	NM_001297440	Cluster1
chr1	65792894	66374574	NM_002600	Cluster1
chr1	63774016	64143369	NM_001083592	Cluster1
chr1	61742479	62163915	NM_001350145	Cluster1
chr1	61742479	62163915	NM_176877	Cluster1
chr1	67832287	68202987	NR_040077	Cluster1
chr1	74198211	74464925	NM_001199327	Cluster1
chr1	74198211	74544432	NM_001112808	Cluster1
chr1	68125357	68232546	NM_001193334	Cluster1
chr1	68098458	68232546	NM_001002292	Cluster1
chr1	68125359	68232523	NM_024911	Cluster1
chr1	76074745	76577207	NM_001160011	Cluster1
chr1	76074745	76634603	NM_001349111	Cluster1
chr1	76074745	76634603	NM_001349105	Cluster1
chr1	76074745	76637316	NM_001349109	Cluster1
chr1	81699769	81993932	NM_001297704	Cluster1
chr1	76074745	76634603	NM_001349108	Cluster1
chr1	76074745	76634603	NM_152996	Cluster1
chr1	76074745	76634603	NM_001349107	Cluster1
chr1	76074745	76634603	NM_001349106	Cluster1
chr1	76074745	76577207	NM_001349110	Cluster1
chr1	76074745	76634603	NR_146056	Cluster1
chr1	84925582	84997113	NM_153259	Cluster1
chr1	86914634	87109982	NM_012262	Cluster1
chr1	86914634	87098445	NM_001134492	Cluster1
chr1	84925582	84997113	NM_001330647	Cluster1
chr1	93310108	93345811	NR_034089	Cluster1
chr1	110082687	110109719	NR_126382	Cluster1
chr1	115283033	115368072	NR_157569	Cluster1
chr1	111139848	111185104	NM_001330743	Cluster1
chr1	111140222	111185104	NR_138483	Cluster1
chr1	116383369	116404776	NM_001160234	Cluster1
chr1	111140222	111185104	NR_138484	Cluster1
chr1	111140222	111185104	NM_006090	Cluster1
chr1	111139498	111185104	NR_138485	Cluster1
chr1	111139382	111185104	NM_001007794	Cluster1
chr1	144641368	144919902	NR_104189	Cluster1
chr1	146486331	146822034	NR_103556	Cluster1
chr1	148887372	148932728	NM_001195260	Cluster1
chr1	149937811	150010726	NM_020205	Cluster1
chr1	148889402	148932728	NM_001195261	Cluster1
chr1	145738867	145824095	NM_014455	Cluster1
chr1	148808341	148932728	NM_022359	Cluster1
chr1	148808341	149033016	NM_001350521	Cluster1
chr1	148808341	149033016	NM_001377392	Cluster1
chr1	148844427	149033016	NM_001198832	Cluster1
chr1	148844427	149033016	NM_001350522	Cluster1
chr1	148844427	149033016	NM_001350523	Cluster1
chr1	148844427	149033016	NM_001377393	Cluster1
chr1	148889559	148932728	NM_001002810	Cluster1
chr1	148889559	148993882	NM_001002812	Cluster1
chr1	148889559	149033019	NM_001198834	Cluster1
chr1	148889559	149033019	NM_014644	Cluster1
chr1	153992691	154155116	NM_207308	Cluster1
chr1	156212987	156243332	NM_001199664	Cluster1
chr1	155185823	155192909	NM_001044393	Cluster1
chr1	155185823	155192909	NM_001044392	Cluster1
chr1	156212987	156243332	NM_001199661	Cluster1
chr1	156212987	156240077	NM_001199653	Cluster1
chr1	156212987	156240077	NM_007221	Cluster1
chr1	156212987	156240077	NM_001199654	Cluster1
chr1	156212987	156243332	NM_001199662	Cluster1
chr1	156212987	156243332	NM_001199663	Cluster1
chr1	155185823	155192909	NM_001018017	Cluster1
chr1	153992691	154155116	NM_001159484	Cluster1
chr1	155185823	155192909	NM_001018016	Cluster1
chr1	155185823	155192909	NM_001044390	Cluster1
chr1	155185823	155192909	NM_001044391	Cluster1
chr1	155185823	155192909	NM_001371720	Cluster1
chr1	162497804	162529629	NM_144624	Cluster1
chr1	164559359	164886047	NM_001353131	Cluster1
chr1	164559721	164851823	NM_001353130	Cluster1
chr1	162497173	162529629	NM_001184763	Cluster1
chr1	162497817	162529631	NM_175866	Cluster1
chr1	165662215	165698562	NM_001365774	Cluster1
chr1	165662211	165698663	NM_000696	Cluster1
chr1	171841497	172418463	NM_001350206	Cluster1
chr1	175067832	175148068	NM_022093	Cluster1
chr1	171841497	172412717	NM_001136127	Cluster1
chr1	169849630	169893896	NM_020423	Cluster1
chr1	171841497	172133392	NM_001350205	Cluster1
chr1	171841497	172412717	NM_001350204	Cluster1
chr1	169853075	169893959	NM_181093	Cluster1
chr1	183472498	183554191	NM_001331007	Cluster1
chr1	179293796	179358679	NM_003101	Cluster1
chr1	183472498	183554191	NM_001174061	Cluster1
chr1	183472498	183554191	NM_001375584	Cluster1
chr1	182450145	182560597	NM_001366934	Cluster1
chr1	183472498	183554191	NM_001350220	Cluster1
chr1	179293713	179358679	NM_001252512	Cluster1
chr1	183472498	183554191	NM_201568	Cluster1
chr1	183472498	183554191	NM_001350221	Cluster1
chr1	183472498	183554191	NM_173156	Cluster1
chr1	183472498	183554191	NM_001375585	Cluster1
chr1	179293796	179358679	NR_045530	Cluster1
chr1	183472498	183554191	NM_001350222	Cluster1
chr1	179293713	179358679	NM_001252511	Cluster1
chr1	183472498	183554191	NM_201569	Cluster1
chr1	183472498	183554191	NM_001350219	Cluster1
chr1	177170957	177282422	NM_021165	Cluster1
chr1	182450145	182560597	NM_001137669	Cluster1
chr1	197084126	197146694	NM_001206846	Cluster1
chr1	202348701	202438242	NM_001167857	Cluster1
chr1	205504668	205532789	NM_002596	Cluster1
chr1	202348701	202438242	NM_001167858	Cluster1
chr1	205504668	205532789	NM_212503	Cluster1
chr1	202348698	202592702	NM_001331029	Cluster1
chr1	202348698	202592702	NM_002481	Cluster1
chr1	206557163	206589447	NM_182665	Cluster1
chr1	206507530	206589447	NM_182664	Cluster1
chr1	207496156	207641765	NM_000651	Cluster1
chr1	206507530	206589447	NM_182663	Cluster1
chr1	205504668	205532789	NM_212502	Cluster1
chr1	207496156	207641765	NM_000573	Cluster1
chr1	204422637	204494805	NM_001377334	Cluster1
chr1	204422637	204494805	NM_001377335	Cluster1
chr1	204422637	204494805	NM_002646	Cluster1
chr1	216503250	217078287	NM_001350125	Cluster1
chr1	210678313	211134148	NM_002238	Cluster1
chr1	216503250	217076992	NM_001243507	Cluster1
chr1	216503250	217090568	NM_001350122	Cluster1
chr1	216503250	217089618	NM_001350123	Cluster1
chr1	212858274	212899363	NM_014053	Cluster1
chr1	211743456	211830338	NM_001320808	Cluster1
chr1	216503250	217089824	NM_001243505	Cluster1
chr1	216503250	217137702	NM_001350124	Cluster1
chr1	210678313	211134148	NM_172362	Cluster1
chr1	216503250	217137702	NM_001243511	Cluster1
chr1	216503250	217076992	NM_001243509	Cluster1
chr1	216503250	217137702	NM_001243510	Cluster1
chr1	216503250	217089618	NM_001243506	Cluster1
chr1	223234915	223364176	NM_001037175	Cluster1
chr1	223220832	223364176	NM_017982	Cluster1
chr1	224385146	224434797	NM_001115113	Cluster1
chr1	231626789	232041272	NM_018662	Cluster1
chr1	231528652	231750619	NR_028400	Cluster1
chr1	231528652	231819244	NR_028394	Cluster1
chr1	231528652	231819244	NR_028395	Cluster1
chr1	231528652	231819244	NR_028396	Cluster1
chr1	231528652	231819244	NR_028397	Cluster1
chr1	231528652	231819244	NR_028398	Cluster1
chr1	231528652	232041273	NR_028393	Cluster1
chr1	231626789	232009654	NM_001164538	Cluster1
chr1	231626789	231959503	NM_001164542	Cluster1
chr1	231626814	231819244	NM_001164544	Cluster1
chr1	231626814	231819244	NM_001164545	Cluster1
chr1	231626789	231959503	NM_001164546	Cluster1
chr1	231626814	231819244	NM_001164548	Cluster1
chr1	231626789	232009654	NM_001164547	Cluster1
chr1	229626215	229660200	NM_001314021	Cluster1
chr1	231626789	231750619	NM_001164551	Cluster1
chr1	231626814	231750619	NM_001164555	Cluster1
chr1	231626789	231855379	NM_001164539	Cluster1
chr1	231626789	232041272	NM_001164540	Cluster1
chr1	231626789	232009654	NM_001164541	Cluster1
chr1	231626789	231866706	NM_001012959	Cluster1
chr1	231626814	231819244	NM_001164556	Cluster1
chr1	231626789	232041272	NM_001164537	Cluster1
chr1	230642480	230693982	NM_007357	Cluster1
chr1	230642480	230693982	NM_001145036	Cluster1
chr1	231626789	231771662	NM_001164549	Cluster1
chr1	229626246	229660200	NM_014777	Cluster1
chr1	231626789	232041272	NM_001012957	Cluster1
chr1	240774741	241357205	NM_001374811	Cluster1
chr1	240775513	241357230	NM_001282773	Cluster1
chr1	240774741	241357205	NM_001374808	Cluster1
chr1	240775513	241355826	NM_001350116	Cluster1
chr1	240775513	241357230	NM_001350113	Cluster1
chr1	240774741	241357205	NM_001374813	Cluster1
chr1	240774741	241357205	NM_001374814	Cluster1
chr1	240775513	241357230	NM_001350115	Cluster1
chr1	240774741	241357205	NM_001374809	Cluster1
chr1	240775513	241357205	NM_001364886	Cluster1
chr1	240775513	241357230	NM_001282775	Cluster1
chr1	240774741	241357205	NM_001374810	Cluster1
chr1	240775513	241357230	NM_001350114	Cluster1
chr1	240091882	240475185	NM_001348094	Cluster1
chr1	240774741	241356958	NM_001374807	Cluster1
chr1	240775513	241357230	NM_001282778	Cluster1
chr1	240775513	241357230	NM_002924	Cluster1
chr1	240774741	241357205	NM_001374815	Cluster1
chr1	240774741	241357205	NM_001374816	Cluster1
chr1	240774741	241357205	NM_001374806	Cluster1
chr1	242082985	242449468	NM_001195812	Cluster1
chr1	242082985	242524697	NM_001320272	Cluster1
chr1	240774741	241357205	NM_001374812	Cluster1
chr1	242088386	242449482	NM_001195811	Cluster1
chr1	242082985	242524697	NM_001372062	Cluster1
chr1	245749346	246507279	NM_001167740	Cluster1
chr1	245154984	245709432	NM_018012	Cluster1
chr1	245749339	246417412	NM_022743	Cluster1
chr1	245749346	246507279	NM_001375962	Cluster1
chr1	1785284	1891117	NM_001282539	Cluster1
chr1	1785285	1891087	NM_002074	Cluster1
chr1	1785284	1891117	NM_001282538	Cluster1
chr1	1702378	1724357	NM_024011	Cluster1
chr1	1541672	1574863	NM_014188	Cluster1
chr1	1702378	1724357	NM_001313896	Cluster1
chr1	1702378	1724357	NR_132739	Cluster1
chr1	1921956	2003786	NM_001304360	Cluster1
chr1	1173879	1197935	NM_001130045	Cluster1
chr1	1173879	1197935	NM_001371649	Cluster1
chr1	1702378	1724357	NM_001313982	Cluster1
chr1	1702378	1724357	NR_132740	Cluster1
chr1	1702378	1724357	NM_033529	Cluster1
chr1	2476314	2505530	NM_001303013	Cluster1
chr1	2355154	2391554	NM_001301060	Cluster1
chr1	2476288	2505532	NM_014638	Cluster1
chr1	2467450	2505532	NM_001303012	Cluster1
chr1	2590639	2633016	NM_033467	Cluster1
chr1	2641268	2800868	NM_001242672	Cluster1
chr1	2321252	2391554	NM_024848	Cluster1
chr1	3652515	3736201	NM_005427	Cluster1
chr1	3487950	3611508	NM_001409	Cluster1
chr1	3652515	3736201	NM_001204186	Cluster1
chr1	3652515	3736201	NM_001204184	Cluster1
chr1	3652564	3736201	NM_001204188	Cluster1
chr1	3652564	3736201	NM_001204187	Cluster1
chr1	3652515	3736201	NM_001204185	Cluster1
chr1	4654608	4792522	NM_018836	Cluster1
chr1	4654608	4777795	NM_001042478	Cluster1
chr1	5862810	5992425	NM_001291593	Cluster1
chr1	6026332	6101180	NM_172130	Cluster1
chr1	6101786	6180321	NM_015557	Cluster1
chr1	5862810	5992425	NM_015102	Cluster1
chr1	5992675	6101180	NM_001199861	Cluster1
chr1	5862810	5992425	NM_001291594	Cluster1
chr1	6026332	6101180	NM_003636	Cluster1
chr1	5862810	5992425	NR_111987	Cluster1
chr1	6785453	6872014	NM_001195563	Cluster1
chr1	6521346	6554513	NM_024654	Cluster1
chr1	6634169	6701816	NM_018198	Cluster1
chr1	7669729	7769706	NM_001349614	Cluster1
chr1	7704735	7769706	NM_001349626	Cluster1
chr1	7669743	7769706	NM_001349625	Cluster1
chr1	7704735	7769706	NM_001349624	Cluster1
chr1	7669729	7769706	NM_001349623	Cluster1
chr1	7704735	7769706	NM_001349622	Cluster1
chr1	7680087	7769706	NM_001349613	Cluster1
chr1	7669729	7769706	NM_001349621	Cluster1
chr1	7704735	7769706	NM_001349619	Cluster1
chr1	7669729	7769706	NM_001349620	Cluster1
chr1	7704735	7769706	NM_001349618	Cluster1
chr1	7669764	7769706	NM_001349617	Cluster1
chr1	7704735	7769706	NM_001349616	Cluster1
chr1	7704735	7769706	NM_001349615	Cluster1
chr1	9148010	9182338	NR_132742	Cluster1
chr1	9040079	9069635	NM_001135585	Cluster1
chr1	9035105	9072259	NM_001328619	Cluster1
chr1	9292893	9369531	NM_025106	Cluster1
chr1	9035105	9069635	NM_001328621	Cluster1
chr1	9035105	9069635	NM_001328620	Cluster1
chr1	9035105	9069635	NM_003039	Cluster1
chr1	10210569	10308597	NM_183416	Cluster1
chr1	10032957	10181238	NM_001105562	Cluster1
chr1	9651730	9729114	NM_005026	Cluster1
chr1	10210705	10381603	NM_015074	Cluster1
chr1	9689543	9729114	NM_001350234	Cluster1
chr1	9943474	9981766	NM_001297779	Cluster1
chr1	9942922	9985498	NM_001297778	Cluster1
chr1	10211615	10381603	NM_001365952	Cluster1
chr1	9943474	9985498	NM_022787	Cluster1
chr1	10210569	10381603	NM_001365951	Cluster1
chr1	9539464	9585173	NM_032315	Cluster1
chr1	10032957	10181238	NM_006048	Cluster1
chr1	9691466	9728922	NM_001350235	Cluster1
chr1	10636605	10796646	NM_001079843	Cluster1
chr1	11106534	11262551	NM_004958	Cluster1
chr1	10647210	10796646	NM_017766	Cluster1
chr1	12166990	12209220	NM_001066	Cluster1
chr1	12230029	12512046	NM_018156	Cluster1
chr1	11664199	11674352	NM_018438	Cluster1
chr1	12230029	12512046	NM_015378	Cluster1
chr1	11785725	11805964	NM_005957	Cluster1
chr1	11785729	11803677	NM_001330358	Cluster1
chr1	13474972	13514003	NM_001010847	Cluster1
chr1	13368441	13371999	NM_001099790	Cluster1
chr1	14348954	14419973	NR_149058	Cluster1
chr1	13704854	13788079	NM_015866	Cluster1
chr1	13704854	13825079	NM_012231	Cluster1
chr1	15153746	15220478	NM_001136218	Cluster1
chr1	15152531	15220478	NM_001136217	Cluster1
chr1	15153746	15220478	NM_018022	Cluster1
chr1	15247224	15398127	NM_052929	Cluster1
chr1	15326679	15343883	NR_148918	Cluster1
chr1	14929665	15068155	NM_001370231	Cluster1
chr1	14924128	15068155	NM_001018000	Cluster1
chr1	15326679	15343883	NR_148919	Cluster1
chr1	15152565	15220478	NM_001136216	Cluster1
chr1	15153746	15220478	NM_001319665	Cluster1
chr1	15456731	15472091	NM_033440	Cluster1
chr1	14929799	15068155	NM_001018001	Cluster1
chr1	14924128	15068155	NM_001370229	Cluster1
chr1	15153746	15220478	NR_135082	Cluster1
chr1	16367241	16398145	NR_073501	Cluster1
chr1	16367241	16398145	NM_001271869	Cluster1
chr1	16367241	16398145	NR_073503	Cluster1
chr1	16367241	16398145	NR_073502	Cluster1
chr1	16367241	16398145	NR_073500	Cluster1
chr1	16246839	16352480	NM_018994	Cluster1
chr1	16367241	16398145	NM_001114600	Cluster1
chr1	17580552	17697875	NM_001011722	Cluster1
chr1	17580552	17697875	NM_001319837	Cluster1
chr1	17618312	17697869	NM_001328124	Cluster1
chr1	17618312	17697875	NM_001319838	Cluster1
chr1	17539697	17697869	NM_018125	Cluster1
chr1	17018725	17054032	NM_003000	Cluster1
chr1	17406759	17439677	NM_018715	Cluster1
chr1	17406759	17438536	NM_001136204	Cluster1
chr1	17539697	17697869	NR_137288	Cluster1
chr1	17539697	17697869	NR_137287	Cluster1
chr1	18630845	18748866	NM_001135254	Cluster1
chr1	18107797	18378483	NM_032880	Cluster1
chr1	19743318	19799349	NM_001349115	Cluster1
chr1	19682212	19799916	NM_001349113	Cluster1
chr1	19338774	19485539	NM_001206541	Cluster1
chr1	19682212	19799916	NM_181719	Cluster1
chr1	19338774	19484295	NM_001282162	Cluster1
chr1	19338774	19485539	NM_001206540	Cluster1
chr1	19265981	19274122	NM_001348421	Cluster1
chr1	19682212	19799916	NM_001349114	Cluster1
chr1	19338774	19485539	NM_004930	Cluster1
chr1	19074510	19210266	NM_020765	Cluster1
chr1	19374174	19485539	NM_001313932	Cluster1
chr1	19682212	19799916	NM_001349112	Cluster1
chr1	20664013	20718007	NM_020816	Cluster1
chr1	20664013	20718007	NM_001122819	Cluster1
chr1	20664013	20718007	NM_001287212	Cluster1
chr1	20290874	20359518	NM_001039500	Cluster1
chr1	20290874	20359518	NM_001377531	Cluster1
chr1	21678298	21783149	NM_001350168	Cluster1
chr1	21217249	21279615	NM_001113347	Cluster1
chr1	21596220	21669357	NM_001330383	Cluster1
chr1	21596220	21669357	NM_001350528	Cluster1
chr1	21596220	21669357	NM_001350525	Cluster1
chr1	21678298	21783149	NM_001350166	Cluster1
chr1	21217249	21290463	NM_001397	Cluster1
chr1	21678298	21783149	NM_001350164	Cluster1
chr1	21678578	21783199	NM_001330394	Cluster1
chr1	21596220	21669357	NM_001350527	Cluster1
chr1	21596220	21669357	NM_002885	Cluster1
chr1	21596220	21651898	NM_001145658	Cluster1
chr1	21678298	21783149	NM_001350167	Cluster1
chr1	21596220	21669357	NM_001350524	Cluster1
chr1	21596220	21669357	NM_001145657	Cluster1
chr1	21678298	21783149	NM_032236	Cluster1
chr1	21217249	21290215	NM_001113349	Cluster1
chr1	21822243	21937310	NM_001291860	Cluster1
chr1	21217249	21345504	NM_001113348	Cluster1
chr1	21596220	21669357	NM_001350526	Cluster1
chr1	21822243	21937310	NM_005529	Cluster1
chr1	21727845	21783199	NM_001032730	Cluster1
chr1	22710838	22921500	NM_001309192	Cluster1
chr1	22710838	22921500	NM_001309193	Cluster1
chr1	22710837	22921500	NM_004442	Cluster1
chr1	22710837	22921500	NM_017449	Cluster1
chr1	23428562	23484179	NM_001143778	Cluster1
chr1	23428562	23484179	NM_017707	Cluster1
chr1	23304689	23344284	NM_001297620	Cluster1
chr1	23304689	23344284	NM_001102399	Cluster1
chr1	23304689	23344284	NM_005826	Cluster1
chr1	23304689	23344284	NM_001297621	Cluster1
chr1	23304689	23344284	NM_001102398	Cluster1
chr1	23304689	23344284	NM_001297622	Cluster1
chr1	23845080	23868369	NM_000147	Cluster1
chr1	23304689	23344284	NM_001102397	Cluster1
chr1	24356998	24413772	NM_001199014	Cluster1
chr1	24356998	24415097	NM_001199012	Cluster1
chr1	24356998	24413782	NM_001199013	Cluster1
chr1	24502343	24541040	NM_001251979	Cluster1
chr1	24502350	24537020	NM_001251984	Cluster1
chr1	24502896	24537020	NM_001251983	Cluster1
chr1	24899510	24930276	NM_004350	Cluster1
chr1	24507593	24537020	NM_001251978	Cluster1
chr1	24899510	24965010	NM_001031680	Cluster1
chr1	24502835	24541040	NM_013441	Cluster1
chr1	24502835	24541040	NM_001251977	Cluster1
chr1	24745446	24844319	NM_013943	Cluster1
chr1	24502896	24537020	NM_001251981	Cluster1
chr1	24899510	24965010	NM_001320672	Cluster1
chr1	25242236	25338254	NM_001321772	Cluster1
chr1	25819905	25832942	NM_001099627	Cluster1
chr1	25272485	25330445	NM_001282870	Cluster1
chr1	25272508	25330445	NM_001282869	Cluster1
chr1	25272485	25330445	NM_001282868	Cluster1
chr1	25543605	25568886	NM_015627	Cluster1
chr1	25820192	25832942	NM_019557	Cluster1
chr1	25272485	25330445	NM_001282867	Cluster1
chr1	25617467	25786207	NM_001289010	Cluster1
chr1	25617467	25786207	NM_020379	Cluster1
chr1	25272485	25330445	NM_001282872	Cluster1
chr1	25272508	25330445	NM_001127691	Cluster1
chr1	25272508	25330445	NM_001282871	Cluster1
chr1	25820827	25832942	NM_001099626	Cluster1
chr1	25819953	25832938	NM_001099625	Cluster1
chr1	26696014	26782104	NM_006015	Cluster1
chr1	27098808	27155125	NR_046474	Cluster1
chr1	27098808	27155125	NM_003047	Cluster1
chr1	26696014	26782104	NM_139135	Cluster1
chr1	26993691	27000886	NM_001013642	Cluster1
chr1	26321858	26354130	NM_001039775	Cluster1
chr1	27970343	28088610	NM_001990	Cluster1
chr1	27773218	27824443	NM_177424	Cluster1
chr1	28147165	28193856	NM_001164722	Cluster1
chr1	27977269	28088610	NM_001282560	Cluster1
chr1	27970343	28088637	NM_001282561	Cluster1
chr1	28147165	28193936	NM_001164721	Cluster1
chr1	27970343	28088637	NM_001282562	Cluster1
chr1	27988472	28088637	NR_104214	Cluster1
chr1	28369739	28500364	NM_001350161	Cluster1
chr1	28553016	28578545	NR_003109	Cluster1
chr1	28369739	28500364	NM_001350158	Cluster1
chr1	28887090	29120046	NM_001166005	Cluster1
chr1	29192656	29230934	NM_016011	Cluster1
chr1	28369739	28500364	NM_001048183	Cluster1
chr1	29192656	29230934	NM_001024732	Cluster1
chr1	28668783	28719352	NM_006582	Cluster1
chr1	28553084	28578545	NM_017846	Cluster1
chr1	28914575	29065221	NM_001166006	Cluster1
chr1	28887090	29120046	NM_203342	Cluster1
chr1	28887099	29120041	NM_203343	Cluster1
chr1	28668783	28719352	NM_001319674	Cluster1
chr1	28369739	28500364	NM_001350159	Cluster1
chr1	29192656	29230934	NR_146214	Cluster1
chr1	29192656	29230934	NM_001349717	Cluster1
chr1	28668783	28719352	NM_024482	Cluster1
chr1	29192656	29230934	NM_001349716	Cluster1
chr1	29192656	29230934	NM_001349715	Cluster1
chr1	28887099	29120041	NM_001166007	Cluster1
chr1	28887099	29120041	NM_004437	Cluster1
chr1	29192656	29230934	NR_146213	Cluster1
chr1	29192656	29230934	NR_146212	Cluster1
chr1	29192656	29230934	NM_001349714	Cluster1
chr1	28369739	28500364	NM_001350160	Cluster1
chr1	28438149	28500364	NM_023923	Cluster1
chr1	29192656	29230934	NM_001349712	Cluster1
chr1	29192656	29230934	NM_001349711	Cluster1
chr1	29192656	29230934	NM_001349713	Cluster1
chr1	29192656	29230934	NR_146215	Cluster1
chr1	28812169	28871267	NM_000911	Cluster1
chr1	28887099	29072573	NM_001376023	Cluster1
chr1	28887099	29072573	NM_001376024	Cluster1
chr1	28887099	29072573	NM_001376025	Cluster1
chr1	28887099	29072573	NM_001376026	Cluster1
chr1	28887099	29072573	NM_001376027	Cluster1
chr1	28887099	29072573	NM_001376028	Cluster1
chr1	28887099	29120041	NM_001376022	Cluster1
chr1	28914568	29072573	NM_001376021	Cluster1
chr1	28914568	29120041	NM_001376014	Cluster1
chr1	28914568	29120041	NM_001376015	Cluster1
chr1	28914568	29072573	NM_001376016	Cluster1
chr1	28914568	29120041	NM_001376013	Cluster1
chr1	28914568	29072573	NM_001376017	Cluster1
chr1	28914568	29072573	NM_001376020	Cluster1
chr1	28914568	29072573	NM_001376019	Cluster1
chr1	28914568	29072573	NM_001376018	Cluster1
chr1	30013951	30037612	NR_110790	Cluster1
chr1	31296981	31364953	NM_001282574	Cluster1
chr1	31179744	31239887	NM_024522	Cluster1
chr1	31296981	31364953	NM_016505	Cluster1
chr1	31296981	31364953	NM_001282567	Cluster1
chr1	31296981	31364953	NM_001282566	Cluster1
chr1	31296981	31364953	NM_001282570	Cluster1
chr1	31296981	31364953	NM_001282572	Cluster1
chr1	31296981	31364953	NM_001282571	Cluster1
chr1	31296981	31364953	NM_001282573	Cluster1
chr1	30931505	31065717	NM_001020658	Cluster1
chr1	31296981	31364953	NM_001282568	Cluster1
chr1	31296981	31364953	NM_001282569	Cluster1
chr1	30931505	31065717	NM_014676	Cluster1
chr1	32364632	32394441	NM_018045	Cluster1
chr1	32364632	32394441	NM_001143888	Cluster1
chr1	32364632	32394441	NM_001143889	Cluster1
chr1	32364632	32394441	NM_001143890	Cluster1
chr1	32364632	32394441	NR_125352	Cluster1
chr1	32364632	32394441	NM_001300958	Cluster1
chr1	32108055	32176563	NM_012316	Cluster1
chr1	32620822	32650932	NM_001366264	Cluster1
chr1	32620822	32650932	NM_001366269	Cluster1
chr1	32620822	32650932	NM_001366270	Cluster1
chr1	32620822	32650932	NM_001366271	Cluster1
chr1	32620822	32650932	NR_158775	Cluster1
chr1	32620822	32650932	NR_158776	Cluster1
chr1	32620822	32650932	NR_158777	Cluster1
chr1	32620822	32650932	NR_158778	Cluster1
chr1	32620822	32650932	NR_158780	Cluster1
chr1	32620822	32650932	NR_158782	Cluster1
chr1	32620822	32650932	NR_158781	Cluster1
chr1	32620822	32650932	NR_158779	Cluster1
chr1	33145401	33176550	NM_001330483	Cluster1
chr1	32620822	32650932	NR_158772	Cluster1
chr1	33007985	33036883	NM_001625	Cluster1
chr1	32620822	32650932	NR_158774	Cluster1
chr1	32620822	32650932	NM_001308135	Cluster1
chr1	32765626	32774970	NM_001198973	Cluster1
chr1	32765626	32774970	NM_001198972	Cluster1
chr1	32620822	32650932	NM_178547	Cluster1
chr1	33007939	33036883	NM_013411	Cluster1
chr1	33007939	33036883	NM_001199199	Cluster1
chr1	33007939	33036883	NM_001319142	Cluster1
chr1	33007939	33036883	NM_001319141	Cluster1
chr1	33013043	33036911	NM_001319143	Cluster1
chr1	33007939	33036883	NM_001319139	Cluster1
chr1	32620822	32650932	NM_001366266	Cluster1
chr1	32620822	32650932	NM_001366265	Cluster1
chr1	32620822	32650932	NM_001366258	Cluster1
chr1	32620822	32650932	NM_001366259	Cluster1
chr1	32620822	32650932	NM_001366260	Cluster1
chr1	32620822	32650932	NR_158773	Cluster1
chr1	32620822	32650932	NM_001366268	Cluster1
chr1	32620822	32650932	NM_001366267	Cluster1
chr1	33256491	33300719	NM_152493	Cluster1
chr1	32741829	32774970	NM_020888	Cluster1
chr1	32620822	32650932	NM_001330475	Cluster1
chr1	33007939	33036883	NR_134976	Cluster1
chr1	33011224	33036911	NM_001319140	Cluster1
chr1	32620822	32650932	NM_001308138	Cluster1
chr1	32620822	32650932	NM_001308137	Cluster1
chr1	32620822	32650932	NM_001308136	Cluster1
chr1	32620822	32650932	NM_001308141	Cluster1
chr1	32620822	32650932	NM_001308140	Cluster1
chr1	32620822	32650932	NM_001308139	Cluster1
chr1	32620822	32650932	NM_001366263	Cluster1
chr1	33145398	33182043	NM_018207	Cluster1
chr1	32620822	32650550	NM_001366278	Cluster1
chr1	32620822	32650932	NM_001366257	Cluster1
chr1	32620822	32650932	NM_001366256	Cluster1
chr1	32620822	32650932	NM_001366255	Cluster1
chr1	32753998	32774970	NM_001369553	Cluster1
chr1	33269692	33300719	NM_001370212	Cluster1
chr1	34176906	34219130	NM_001134734	Cluster1
chr1	34166992	34219130	NM_032884	Cluster1
chr1	35433491	35557403	NM_024874	Cluster1
chr1	34986165	35031945	NM_007167	Cluster1
chr1	35268708	35422058	NM_001350138	Cluster1
chr1	35268708	35422058	NM_001350139	Cluster1
chr1	35268708	35422058	NM_001350140	Cluster1
chr1	35268708	35422058	NM_005095	Cluster1
chr1	35268708	35421944	NM_001375653	Cluster1
chr1	35883208	35930531	NM_012199	Cluster1
chr1	36428299	36450451	NM_206837	Cluster1
chr1	36156159	36180849	NM_018067	Cluster1
chr1	35883194	35924298	NM_001317122	Cluster1
chr1	36417905	36450451	NM_145047	Cluster1
chr1	36306367	36321347	NM_001162530	Cluster1
chr1	36156159	36180849	NM_001286366	Cluster1
chr1	36156159	36180849	NM_001286365	Cluster1
chr1	36417905	36450485	NM_001330493	Cluster1
chr1	35869807	35924298	NM_001317123	Cluster1
chr1	37611349	37634892	NM_001242909	Cluster1
chr1	37611349	37634892	NM_001242910	Cluster1
chr1	37611349	37634892	NM_001038633	Cluster1
chr1	36795526	37034515	NM_000831	Cluster1
chr1	37611349	37634892	NM_001242908	Cluster1
chr1	37860696	37947057	NM_001365821	Cluster1
chr1	37860696	37947057	NR_158628	Cluster1
chr1	37860696	37947057	NM_001365824	Cluster1
chr1	37860696	37946869	NM_001365820	Cluster1
chr1	37860696	37947057	NR_158629	Cluster1
chr1	37860696	37931791	NR_158631	Cluster1
chr1	37860696	37947057	NM_001365825	Cluster1
chr1	37860696	37931739	NM_001350227	Cluster1
chr1	37860696	37946869	NM_001365822	Cluster1
chr1	37860696	37947053	NM_005540	Cluster1
chr1	37860696	37931739	NM_001297434	Cluster1
chr1	37860696	37947057	NM_001365823	Cluster1
chr1	37860696	37947057	NR_158630	Cluster1
chr1	37860696	37942264	NM_001350228	Cluster1
chr1	39084166	39487138	NM_012090	Cluster1
chr1	38885806	38929519	NM_001304746	Cluster1
chr1	38885806	38941830	NM_017821	Cluster1
chr1	40709365	40771603	NM_001308115	Cluster1
chr1	40692007	40771603	NM_001142590	Cluster1
chr1	40620679	40665682	NM_014747	Cluster1
chr1	40738835	40771606	NM_001308114	Cluster1
chr1	40691703	40771603	NM_001142589	Cluster1
chr1	40161386	40240921	NM_012421	Cluster1
chr1	40691703	40771603	NM_001142588	Cluster1
chr1	40691703	40771603	NM_001142587	Cluster1
chr1	40691703	40771603	NM_014223	Cluster1
chr1	41014589	41043890	NR_037868	Cluster1
chr1	41027198	41161432	NM_001172222	Cluster1
chr1	41027201	41242306	NM_001172220	Cluster1
chr1	41027198	41161432	NM_001350668	Cluster1
chr1	41027201	41242306	NM_001172218	Cluster1
chr1	41506364	41918922	NM_001127714	Cluster1
chr1	41027198	41163017	NM_001172221	Cluster1
chr1	41027201	41242306	NM_001172219	Cluster1
chr1	41027201	41242306	NM_001350667	Cluster1
chr1	42176538	42335215	NM_001198852	Cluster1
chr1	42857621	42888792	NR_104171	Cluster1
chr1	42463285	42657190	NM_001355224	Cluster1
chr1	42176547	42334955	NM_001198851	Cluster1
chr1	42176547	42335880	NM_001198850	Cluster1
chr1	42456493	42473378	NM_001287511	Cluster1
chr1	42463285	42654190	NM_001355227	Cluster1
chr1	42533019	42654190	NM_001080850	Cluster1
chr1	42176547	42335235	NM_014947	Cluster1
chr1	43707535	43931159	NM_001350621	Cluster1
chr1	43707535	43931159	NR_073020	Cluster1
chr1	43707496	43931165	NM_001270466	Cluster1
chr1	43707496	43931165	NM_174965	Cluster1
chr1	43707535	43931159	NM_174971	Cluster1
chr1	43707535	43931159	NM_174963	Cluster1
chr1	43172329	43254358	NM_001195831	Cluster1
chr1	43707535	43931159	NM_001350620	Cluster1
chr1	43707535	43931159	NM_174969	Cluster1
chr1	43707535	43931159	NM_174968	Cluster1
chr1	43707535	43931159	NM_001270463	Cluster1
chr1	43707535	43931159	NM_001270462	Cluster1
chr1	43707535	43931159	NM_174970	Cluster1
chr1	43707535	43931159	NM_174964	Cluster1
chr1	43707535	43931159	NM_174966	Cluster1
chr1	43707496	43931165	NM_001270465	Cluster1
chr1	43707535	43931159	NM_174967	Cluster1
chr1	43707535	43931159	NR_073018	Cluster1
chr1	43707535	43931159	NM_006279	Cluster1
chr1	43707535	43931159	NR_073021	Cluster1
chr1	43707535	43931159	NR_073019	Cluster1
chr1	43707535	43931159	NR_073016	Cluster1
chr1	43707535	43931159	NR_073017	Cluster1
chr1	43707535	43931159	NR_146867	Cluster1
chr1	43707535	43931159	NM_001363573	Cluster1
chr1	43707535	43931159	NM_001270464	Cluster1
chr1	43707535	43931159	NM_001270461	Cluster1
chr1	43707535	43931159	NM_001350619	Cluster1
chr1	43707535	43931159	NM_001270460	Cluster1
chr1	43707535	43931159	NM_001270459	Cluster1
chr1	43707535	43931159	NR_073023	Cluster1
chr1	44874528	44986722	NM_001166588	Cluster1
chr1	44221069	44355279	NM_001301699	Cluster1
chr1	44221069	44355279	NM_001301700	Cluster1
chr1	44221069	44355279	NM_001301701	Cluster1
chr1	44850521	44986722	NM_001261418	Cluster1
chr1	44405254	44651723	NM_018150	Cluster1
chr1	44821937	44843253	NM_003738	Cluster1
chr1	44674713	44725591	NM_001145636	Cluster1
chr1	44221069	44355257	NM_024066	Cluster1
chr1	44819843	44842944	NM_001166292	Cluster1
chr1	44406791	44651723	NM_001376488	Cluster1
chr1	44850521	44986595	NM_020365	Cluster1
chr1	44424000	44651723	NM_001319957	Cluster1
chr1	44221069	44355257	NM_001301698	Cluster1
chr1	44405159	44651724	NM_001319956	Cluster1
chr1	44405254	44651723	NM_001376486	Cluster1
chr1	44405254	44651723	NM_001376487	Cluster1
chr1	45343882	45491163	NM_001320800	Cluster1
chr1	45583987	45618906	NM_001195193	Cluster1
chr1	45343882	45491163	NM_007170	Cluster1
chr1	45694325	45750813	NM_001145349	Cluster1
chr1	45584040	45618893	NM_002482	Cluster1
chr1	45803611	46036122	NM_015112	Cluster1
chr1	45803612	46036124	NM_001319245	Cluster1
chr1	45864347	46036124	NM_001324321	Cluster1
chr1	45698734	45750653	NM_005897	Cluster1
chr1	45803606	46036124	NM_001324320	Cluster1
chr1	45584040	45618893	NM_152298	Cluster1
chr1	46635038	46665878	NM_001243728	Cluster1
chr1	46635038	46668427	NM_022745	Cluster1
chr1	46635038	46668427	NM_001042546	Cluster1
chr1	46247687	46278473	NM_001370766	Cluster1
chr1	46247694	46278473	NM_001142548	Cluster1
chr1	46247762	46278473	NM_003579	Cluster1
chr1	46394316	46413845	NM_001441	Cluster1
chr1	46635038	46665878	NM_001256418	Cluster1
chr1	48101714	48182428	NR_026749	Cluster1
chr1	47760527	47997385	NM_001194986	Cluster1
chr1	48295371	48472208	NM_001286239	Cluster1
chr1	48727522	48776969	NM_001302082	Cluster1
chr1	48727522	48776969	NM_001349795	Cluster1
chr1	48727522	48776969	NM_001349793	Cluster1
chr1	48727522	48776969	NM_001349794	Cluster1
chr1	48727518	48776891	NM_024603	Cluster1
chr1	48727522	48776969	NR_146232	Cluster1
chr1	48295372	48472204	NM_001286238	Cluster1
chr1	49374200	49472085	NR_046839	Cluster1
chr1	50108919	50203772	NM_021952	Cluster1
chr1	50108919	50203772	NM_001144774	Cluster1
chr1	50106230	50203772	NM_001144775	Cluster1
chr1	50108919	50203772	NM_001324209	Cluster1
chr1	50048054	50203772	NM_001324208	Cluster1
chr1	50109832	50203772	NM_001324214	Cluster1
chr1	50109832	50203772	NM_001324213	Cluster1
chr1	50108919	50203772	NM_001324212	Cluster1
chr1	50109832	50203772	NM_001324215	Cluster1
chr1	50103908	50203772	NM_001144776	Cluster1
chr1	50048054	50203772	NM_001144777	Cluster1
chr1	51236272	51273447	NM_014372	Cluster1
chr1	51102227	51148085	NM_001136508	Cluster1
chr1	50437027	50960267	NM_007051	Cluster1
chr1	51617091	51789219	NM_024586	Cluster1
chr1	52142088	52346686	NM_007324	Cluster1
chr1	51617091	51789219	NR_036662	Cluster1
chr1	51617091	51789219	NM_001350208	Cluster1
chr1	51617091	51789219	NM_148909	Cluster1
chr1	51617091	51789219	NM_001350209	Cluster1
chr1	51617091	51789219	NM_148908	Cluster1
chr1	52142093	52346686	NM_004799	Cluster1
chr1	52020131	52055191	NM_015913	Cluster1
chr1	52032096	52056171	NR_046406	Cluster1
chr1	52032096	52056171	NR_046405	Cluster1
chr1	51729849	51789219	NM_001350210	Cluster1
chr1	51617091	51789219	NM_148906	Cluster1
chr1	52684448	52698347	NM_023077	Cluster1
chr1	53062212	53085494	NM_153703	Cluster1
chr1	52726452	52827336	NM_024646	Cluster1
chr1	53062212	53085494	NM_001199081	Cluster1
chr1	53062212	53085493	NM_001199080	Cluster1
chr1	53851732	53889797	NM_018982	Cluster1
chr1	53506232	53734204	NM_147193	Cluster1
chr1	54132719	54153181	NM_001353655	Cluster1
chr1	54225431	54406394	NM_145716	Cluster1
chr1	53851732	53889797	NR_036640	Cluster1
chr1	53851732	53889797	NR_036639	Cluster1
chr1	53506238	53739164	NM_001367484	Cluster1
chr1	54225431	54406394	NM_018070	Cluster1
chr1	54225431	54406394	NM_001009955	Cluster1
chr1	53851732	53889797	NR_135075	Cluster1
chr1	54641739	54710267	NM_001291332	Cluster1
chr1	54641739	54710267	NR_026782	Cluster1
chr1	54641739	54710267	NR_111931	Cluster1
chr1	54641739	54742655	NR_037639	Cluster1
chr1	54641739	54742655	NR_037640	Cluster1
chr1	54641739	54742655	NR_037641	Cluster1
chr1	55039547	55064852	NM_174936	Cluster1
chr1	55040221	55064853	NR_110451	Cluster1
chr1	54784550	54801323	NM_017904	Cluster1
chr1	54779712	54801323	NM_001114108	Cluster1
chr1	54641785	54710266	NM_001039464	Cluster1
chr1	56718790	56819404	NM_001004303	Cluster1
chr1	56854796	56918223	NM_000562	Cluster1
chr1	56994777	57424060	NM_001353986	Cluster1
chr1	56994777	57424306	NM_001353985	Cluster1
chr1	57143998	57424060	NM_001365795	Cluster1
chr1	57143998	57424306	NM_001365794	Cluster1
chr1	56994777	57423112	NM_001365793	Cluster1
chr1	56994777	57424060	NM_001365792	Cluster1
chr1	56994777	57424921	NM_001353983	Cluster1
chr1	58785150	58899712	NR_034014	Cluster1
chr1	58785150	58899712	NR_034015	Cluster1
chr1	58785150	58899712	NR_108106	Cluster1
chr1	59296812	59762727	NM_001350797	Cluster1
chr1	59296812	59762727	NM_001350798	Cluster1
chr1	59310031	59762727	NM_001350791	Cluster1
chr1	59296812	59762727	NM_001350796	Cluster1
chr1	59297093	59762727	NM_001350795	Cluster1
chr1	59297093	59762730	NM_018291	Cluster1
chr1	59310031	59762727	NM_001350792	Cluster1
chr1	59310031	59762727	NM_001350799	Cluster1
chr1	59515629	59762727	NM_001278224	Cluster1
chr1	59310031	59762727	NM_001350790	Cluster1
chr1	59310031	59762727	NM_001350794	Cluster1
chr1	59297093	59699394	NR_103473	Cluster1
chr1	59296812	59762727	NM_001350793	Cluster1
chr1	59297093	59762727	NM_001113411	Cluster1
chr1	59310031	59762727	NM_001244714	Cluster1
chr1	60515715	60622685	NR_146508	Cluster1
chr1	59990393	60073770	NM_152377	Cluster1
chr1	60940243	60970776	NR_110617	Cluster1
chr1	61081738	61462788	NM_001145512	Cluster1
chr1	61077226	61462788	NM_001145511	Cluster1
chr1	62236164	62319434	NM_181712	Cluster1
chr1	62454725	62688386	NM_001367561	Cluster1
chr1	62454725	62688368	NM_001272001	Cluster1
chr1	62454725	62688368	NM_001271999	Cluster1
chr1	62454725	62688368	NM_033407	Cluster1
chr1	62454725	62688368	NM_001272000	Cluster1
chr1	62584101	62688386	NM_001272002	Cluster1
chr1	62236164	62319434	NM_001320269	Cluster1
chr1	62454725	62688368	NM_001330614	Cluster1
chr1	63159082	63317257	NR_038252	Cluster1
chr1	64833228	64966549	NM_002227	Cluster1
chr1	64833222	64966936	NM_001320923	Cluster1
chr1	64505913	64693058	NM_001293274	Cluster1
chr1	64833228	64966549	NM_001321857	Cluster1
chr1	64470128	64693053	NM_020925	Cluster1
chr1	64833222	64966936	NM_001321856	Cluster1
chr1	64833228	64966549	NM_001321855	Cluster1
chr1	65525688	65635428	NM_001198689	Cluster1
chr1	65525688	65626234	NM_001198688	Cluster1
chr1	65420651	65630412	NM_001003680	Cluster1
chr1	65420667	65641559	NM_002303	Cluster1
chr1	65420651	65635428	NM_001003679	Cluster1
chr1	65525650	65630429	NM_001198687	Cluster1
chr1	65264693	65415869	NM_001256865	Cluster1
chr1	65309542	65415871	NM_001256864	Cluster1
chr1	66924894	66988619	NM_001146113	Cluster1
chr1	66924989	66988619	NM_001350530	Cluster1
chr1	66924894	66988619	NM_001146111	Cluster1
chr1	66924989	66988619	NM_001146110	Cluster1
chr1	66924989	66988619	NM_001146112	Cluster1
chr1	66534152	66751139	NM_001350217	Cluster1
chr1	66534152	66751139	NM_001350218	Cluster1
chr1	67307872	67398722	NM_001374259	Cluster1
chr1	67307363	67396900	NM_001559	Cluster1
chr1	67701474	67833467	NM_018841	Cluster1
chr1	67307363	67396900	NM_001319233	Cluster1
chr1	67307363	67396900	NM_001258214	Cluster1
chr1	67307363	67396900	NM_001258216	Cluster1
chr1	67307363	67396900	NM_001258215	Cluster1
chr1	67307363	67396900	NR_047583	Cluster1
chr1	67307363	67396900	NR_047584	Cluster1
chr1	69055897	69185002	NR_146608	Cluster1
chr1	69568753	70144363	NM_001350216	Cluster1
chr1	69567921	70144363	NM_001370785	Cluster1
chr1	71081323	71237723	NR_046217	Cluster1
chr1	74026017	74198176	NM_001322315	Cluster1
chr1	74026017	74198176	NM_001105659	Cluster1
chr1	74705487	74733050	NM_001889	Cluster1
chr1	74705487	74733408	NM_001130042	Cluster1
chr1	74705487	74733408	NM_001134759	Cluster1
chr1	74705487	74733408	NM_001130043	Cluster1
chr1	74568122	74673792	NM_001002912	Cluster1
chr1	75724346	75763678	NM_001286043	Cluster1
chr1	75724346	75763678	NM_001286042	Cluster1
chr1	75724708	75763678	NM_000016	Cluster1
chr1	75724346	75763678	NM_001127328	Cluster1
chr1	75796881	75913241	NM_002440	Cluster1
chr1	75724346	75763678	NM_001286044	Cluster1
chr1	77282018	77559966	NM_174858	Cluster1
chr1	77283086	77559966	NM_012093	Cluster1
chr1	76867479	77067546	NM_001320273	Cluster1
chr1	76867479	77067546	NM_030965	Cluster1
chr1	76867479	77067546	NM_001320274	Cluster1
chr1	77711501	77759852	NM_201626	Cluster1
chr1	77779623	77879540	NM_001270384	Cluster1
chr1	77779804	77879540	NM_001363583	Cluster1
chr1	77779804	77879540	NM_001363584	Cluster1
chr1	77779804	77879540	NM_001363586	Cluster1
chr1	78229598	78369462	NR_027310	Cluster1
chr1	77979157	78017964	NM_001317102	Cluster1
chr1	78490973	78540701	NM_000959	Cluster1
chr1	78044969	78138442	NM_001304725	Cluster1
chr1	77779623	77879540	NM_198549	Cluster1
chr1	77979157	78017964	NM_001317100	Cluster1
chr1	78045965	78138442	NM_017655	Cluster1
chr1	77979157	78017964	NM_001317101	Cluster1
chr1	77980183	78017964	NM_001317099	Cluster1
chr1	78490973	78540701	NM_001039585	Cluster1
chr1	77695988	77759852	NM_001377430	Cluster1
chr1	77695988	77759852	NM_001377431	Cluster1
chr1	77695988	77759852	NM_001377432	Cluster1
chr1	77695988	77759852	NM_001377433	Cluster1
chr1	77695988	77759852	NM_001377434	Cluster1
chr1	77695988	77759852	NM_001377435	Cluster1
chr1	77695988	77759852	NM_001377436	Cluster1
chr1	77695988	77759852	NM_001377437	Cluster1
chr1	77695988	77759852	NM_001377438	Cluster1
chr1	77695988	77759852	NM_001377439	Cluster1
chr1	77695988	77759852	NM_015017	Cluster1
chr1	77695988	77759852	NM_201624	Cluster1
chr1	81800375	81993932	NM_001350699	Cluster1
chr1	81800396	81993932	NM_001297706	Cluster1
chr1	81800396	81993932	NM_001297705	Cluster1
chr1	81800933	81993932	NM_001350698	Cluster1
chr1	84643706	84690468	NM_001166295	Cluster1
chr1	84398531	84415008	NM_021233	Cluster1
chr1	84643705	84690461	NM_014021	Cluster1
chr1	84506385	84556495	NM_001310156	Cluster1
chr1	84643705	84690461	NM_001166294	Cluster1
chr1	84643705	84690461	NM_001166417	Cluster1
chr1	84643705	84690461	NM_001166293	Cluster1
chr1	85062326	85133138	NM_145172	Cluster1
chr1	85318484	85578200	NM_001134445	Cluster1
chr1	85062297	85133138	NM_001288563	Cluster1
chr1	86346823	86396342	NM_001184766	Cluster1
chr1	86346823	86396342	NM_001184765	Cluster1
chr1	86862444	86914365	NM_203341	Cluster1
chr1	86862444	86914126	NM_004261	Cluster1
chr1	86862444	86914577	NR_144513	Cluster1
chr1	86862444	86914475	NR_144512	Cluster1
chr1	86346836	86396323	NM_001007022	Cluster1
chr1	87129764	87169203	NR_026989	Cluster1
chr1	88684272	88836255	NM_001320709	Cluster1
chr1	88684272	88836255	NM_001320708	Cluster1
chr1	88684143	88836255	NM_001320707	Cluster1
chr1	88852632	88891567	NM_001514	Cluster1
chr1	89258950	89272860	NM_001134486	Cluster1
chr1	89258950	89272860	NM_052942	Cluster1
chr1	89821938	89936611	NM_018103	Cluster1
chr1	89821031	89936611	NM_001134479	Cluster1
chr1	90915299	91021508	NM_016620	Cluster1
chr1	90915299	91022255	NM_032186	Cluster1
chr1	90782983	90851638	NR_135038	Cluster1
chr1	90915305	91022035	NM_201269	Cluster1
chr1	90829546	90851650	NR_147930	Cluster1
chr1	90829546	90851650	NR_147931	Cluster1
chr1	91949370	92014428	NM_001242806	Cluster1
chr1	91949370	92014428	NM_001242810	Cluster1
chr1	91949370	92014428	NM_001242805	Cluster1
chr1	91952151	92014428	NM_001726	Cluster1
chr1	91680342	91906002	NM_001195684	Cluster1
chr1	91680342	91886151	NM_003243	Cluster1
chr1	91680342	91886151	NR_036634	Cluster1
chr1	91949370	92014428	NM_001242808	Cluster1
chr1	91680342	91886151	NM_001195683	Cluster1
chr1	91949370	92014428	NM_001242807	Cluster1
chr1	91949370	92014428	NM_207189	Cluster1
chr1	92080344	92184723	NM_001376131	Cluster1
chr1	92832728	92961522	NM_001252273	Cluster1
chr1	92842159	92961522	NM_001252269	Cluster1
chr1	92842159	92961522	NM_001252270	Cluster1
chr1	92508695	92792410	NM_005665	Cluster1
chr1	92842166	92961462	NM_001006605	Cluster1
chr1	92508695	92785108	NM_001350198	Cluster1
chr1	92508695	92785108	NM_001350197	Cluster1
chr1	92508695	92785108	NM_001377210	Cluster1
chr1	92508695	92785108	NM_001377211	Cluster1
chr1	92508695	92785108	NM_001377212	Cluster1
chr1	92508695	92785108	NM_001377213	Cluster1
chr1	92508695	92792410	NM_001308248	Cluster1
chr1	93448130	93554661	NM_001164473	Cluster1
chr1	93561740	93847219	NM_001261408	Cluster1
chr1	93561740	93614097	NM_001261410	Cluster1
chr1	93561740	93681837	NM_003567	Cluster1
chr1	93992833	94121148	NM_000350	Cluster1
chr1	93561785	93681370	NM_001261409	Cluster1
chr1	93448130	93554661	NM_001024948	Cluster1
chr1	93448117	93554661	NM_017737	Cluster1
chr1	94974404	95072951	NR_131032	Cluster1
chr1	94974404	95072951	NM_144988	Cluster1
chr1	95117354	95197605	NM_152487	Cluster1
chr1	94974404	95072951	NM_001305242	Cluster1
chr1	95092516	95197605	NM_001199679	Cluster1
chr1	95117922	95244953	NM_001199691	Cluster1
chr1	94616355	94820232	NR_160779	Cluster1
chr1	94616355	94820232	NR_160780	Cluster1
chr1	94657532	94820232	NR_104131	Cluster1
chr1	94672896	94820232	NR_160781	Cluster1
chr1	94672896	94820232	NR_160782	Cluster1
chr1	94672896	94820232	NR_160783	Cluster1
chr1	94672896	94820232	NR_160784	Cluster1
chr1	94418388	94518663	NM_002858	Cluster1
chr1	96254068	96374125	NR_110693	Cluster1
chr1	96721604	96815049	NM_001300988	Cluster1
chr1	96721604	96815049	NM_021190	Cluster1
chr1	98661720	98760500	NM_001364903	Cluster1
chr1	98890244	99004861	NM_001037317	Cluster1
chr1	98890244	99004861	NM_001010861	Cluster1
chr1	100133149	100150498	NR_135078	Cluster1
chr1	99703969	99766635	NM_001361041	Cluster1
chr1	100266157	100292769	NM_003729	Cluster1
chr1	100266157	100292769	NM_001130841	Cluster1
chr1	99703966	99765793	NM_001013660	Cluster1
chr1	100133149	100150498	NM_019083	Cluster1
chr1	100896089	100981757	NM_001144884	Cluster1
chr1	102876466	103108496	NM_001190709	Cluster1
chr1	103525698	103555237	NM_017619	Cluster1
chr1	107141038	107484923	NM_001372169	Cluster1
chr1	107571160	107965180	NM_006113	Cluster1
chr1	107571160	107688499	NM_001079874	Cluster1
chr1	107141038	107484923	NM_001372166	Cluster1
chr1	107140087	107484923	NM_001372167	Cluster1
chr1	107141334	107484923	NM_001372171	Cluster1
chr1	107141334	107484923	NM_001372170	Cluster1
chr1	107141038	107484923	NM_001372168	Cluster1
chr1	108648294	108661093	NM_001102592	Cluster1
chr1	108876984	108934335	NM_001321039	Cluster1
chr1	108648287	108661526	NM_144584	Cluster1
chr1	108876984	108934544	NM_001321038	Cluster1
chr1	109114114	109206781	NM_001267048	Cluster1
chr1	109114114	109206781	NM_020775	Cluster1
chr1	109114114	109206781	NM_001284352	Cluster1
chr1	109309565	109393357	NM_001205228	Cluster1
chr1	109548614	109600193	NM_006496	Cluster1
chr1	110210313	110234044	NM_001039574	Cluster1
chr1	110210313	110234044	NR_036437	Cluster1
chr1	110873099	110899936	NM_001320638	Cluster1
chr1	110210313	110234044	NM_001377330	Cluster1
chr1	110210313	110234044	NM_001377331	Cluster1
chr1	110210313	110234044	NM_004978	Cluster1
chr1	111775831	111989155	NM_172198	Cluster1
chr1	111664793	111716695	NM_001370217	Cluster1
chr1	111775831	111989155	NM_004980	Cluster1
chr1	111542008	111716695	NM_001370216	Cluster1
chr1	113073197	113132260	NM_014813	Cluster1
chr1	112541790	112619418	NM_138729	Cluster1
chr1	112523514	112619141	NM_138728	Cluster1
chr1	112523514	112619141	NM_138727	Cluster1
chr1	112523514	112619141	NM_017744	Cluster1
chr1	112396213	112461164	NM_018704	Cluster1
chr1	113073197	113132260	NM_001312686	Cluster1
chr1	112523514	112619141	NM_001308264	Cluster1
chr1	112720566	112727234	NM_001004440	Cluster1
chr1	113761831	113812476	NM_018364	Cluster1
chr1	113894194	113905028	NM_001253853	Cluster1
chr1	113894194	113905028	NM_006594	Cluster1
chr1	113894194	113904799	NM_001308312	Cluster1
chr1	113894194	113904799	NM_001253852	Cluster1
chr1	113761831	113812476	NR_130896	Cluster1
chr1	114392792	114511203	NM_033020	Cluster1
chr1	115048010	115089503	NM_005725	Cluster1
chr1	114673098	114695618	NM_001172626	Cluster1
chr1	114673098	114695618	NM_000036	Cluster1
chr1	114854802	114995369	NM_001282542	Cluster1
chr1	115048010	115089500	NM_001308315	Cluster1
chr1	115048010	115089500	NM_001308316	Cluster1
chr1	114854802	114995369	NM_001282541	Cluster1
chr1	114392792	114511203	NM_015906	Cluster1
chr1	116111754	116135240	NM_152367	Cluster1
chr1	117025481	117059490	NR_110786	Cluster1
chr1	117295465	117321336	NR_126408	Cluster1
chr1	116574407	116667733	NM_001007237	Cluster1
chr1	117143586	117210927	NM_024626	Cluster1
chr1	116514533	116571026	NR_026665	Cluster1
chr1	116574397	116667755	NM_001542	Cluster1
chr1	116514533	116571026	NM_001779	Cluster1
chr1	116518699	116571093	NM_001144822	Cluster1
chr1	117143586	117210927	NR_045604	Cluster1
chr1	117143586	117210927	NR_045603	Cluster1
chr1	117143586	117203836	NM_001253849	Cluster1
chr1	117143586	117210960	NM_001253850	Cluster1
chr1	116909915	116990352	NM_020440	Cluster1
chr1	119140395	119151408	NR_125977	Cluster1
chr1	119140395	119183823	NR_125974	Cluster1
chr1	119140395	119234178	NR_125976	Cluster1
chr1	119140395	119275973	NR_125975	Cluster1
chr1	120415026	120469670	NR_102404	Cluster1
chr1	119794016	119811460	NM_032044	Cluster1
chr1	119794016	119811460	NM_001159352	Cluster1
chr1	120415026	120469670	NM_001037501	Cluster1
chr1	120415026	120469670	NR_102405	Cluster1
chr1	121360155	121397905	NR_104189_r1	Cluster1
chr1	121184974	121392874	NM_001271872	Cluster1
chr1	121107174	121117292	NR_027337	Cluster1
chr1	121184974	121392874	NM_001329984	Cluster1
chr1	121107174	121117292	NR_160942	Cluster1
chr1	121059762	121118626	NR_160941	Cluster1
chr1	121107174	121118626	NR_160940	Cluster1
chr1	144421385	144459464	NM_001170755	Cluster1
chr1	144421385	144456805	NM_173638	Cluster1
chr1	145094758	145112692	NM_001345942	Cluster1
chr1	145607959	145670464	NM_001097613	Cluster1
chr1	145607959	145670464	NR_036541	Cluster1
chr1	144887190	145093443	NM_001366280	Cluster1
chr1	144887190	145095316	NM_001368324	Cluster1
chr1	145095973	145112696	NM_207418	Cluster1
chr1	144887190	145093443	NM_001330684	Cluster1
chr1	145289899	145405778	NM_001278267	Cluster1
chr1	144887190	145095316	NM_001271870	Cluster1
chr1	145607987	145670650	NM_001097612	Cluster1
chr1	145866559	145885866	NM_001280799	Cluster1
chr1	145866563	145885866	NM_144698	Cluster1
chr1	147382191	147517875	NR_038423	Cluster1
chr1	147186260	147225339	NM_001461	Cluster1
chr1	147541500	147626214	NM_004326	Cluster1
chr1	147184304	147225638	NM_001144829	Cluster1
chr1	147172746	147295762	NM_001348451	Cluster1
chr1	147186260	147225638	NM_001144830	Cluster1
chr1	147928373	147993592	NM_001350181	Cluster1
chr1	147928373	147993592	NM_001350182	Cluster1
chr1	147928373	147993592	NM_001350183	Cluster1
chr1	147928373	147993592	NM_001350184	Cluster1
chr1	148208092	148247071	NR_120331	Cluster1
chr1	147928419	147993592	NM_016334	Cluster1
chr1	148600284	148679746	NM_001364007	Cluster1
chr1	148102045	148152281	NM_183372	Cluster1
chr1	148102045	148152281	NR_110864	Cluster1
chr1	147928373	147993592	NM_001350180	Cluster1
chr1	148102045	148152281	NR_046188	Cluster1
chr1	148599806	148679764	NM_001364008	Cluster1
chr1	148102045	148135813	NM_001101663	Cluster1
chr1	149475897	149556361	NM_001351365	Cluster1
chr1	149390620	149471833	NM_001364012	Cluster1
chr1	149390637	149465302	NM_001364013	Cluster1
chr1	148952456	149033019	NM_001350520	Cluster1
chr1	150067775	150145329	NM_001279354	Cluster1
chr1	150730187	150765778	NM_004079	Cluster1
chr1	150364110	150476565	NM_001297673	Cluster1
chr1	150364110	150476565	NM_001297674	Cluster1
chr1	150809713	150876599	NM_001350226	Cluster1
chr1	150321467	150353228	NR_146766	Cluster1
chr1	150809713	150876599	NM_001197325	Cluster1
chr1	150809713	150876599	NM_001350225	Cluster1
chr1	150730187	150765778	NM_001199739	Cluster1
chr1	150067381	150145329	NM_001279353	Cluster1
chr1	150321467	150353228	NR_146767	Cluster1
chr1	150321467	150353228	NM_001350529	Cluster1
chr1	150321467	150353228	NR_146769	Cluster1
chr1	150809713	150876599	NM_001668	Cluster1
chr1	150809713	150876599	NM_178427	Cluster1
chr1	150809713	150876599	NM_001350224	Cluster1
chr1	150321467	150353228	NR_146768	Cluster1
chr1	150364110	150476565	NM_015203	Cluster1
chr1	150809713	150876599	NM_001286036	Cluster1
chr1	150809713	150876599	NM_001286035	Cluster1
chr1	150321532	150353233	NM_004698	Cluster1
chr1	151773479	151790534	NM_001083963	Cluster1
chr1	151511386	151538691	NM_020770	Cluster1
chr1	151612049	151699080	NM_001330723	Cluster1
chr1	151771567	151790500	NM_006862	Cluster1
chr1	151612049	151699080	NM_030918	Cluster1
chr1	151773495	151790500	NM_001083965	Cluster1
chr1	151773479	151790534	NM_001083964	Cluster1
chr1	151254733	151267460	NM_001330692	Cluster1
chr1	151254733	151267478	NM_002810	Cluster1
chr1	153804726	153922972	NM_020699	Cluster1
chr1	153728049	153774808	NM_023015	Cluster1
chr1	153728049	153774808	NM_001324475	Cluster1
chr1	155051315	155062775	NM_207195	Cluster1
chr1	155051315	155062775	NM_207197	Cluster1
chr1	155051315	155062775	NM_207191	Cluster1
chr1	154502218	154548147	NM_182499	Cluster1
chr1	155051315	155062775	NM_207194	Cluster1
chr1	154697465	154868070	NM_001365838	Cluster1
chr1	154924739	154936719	NM_006556	Cluster1
chr1	155051315	155062775	NM_001261465	Cluster1
chr1	154924739	154936719	NM_001323011	Cluster1
chr1	154924739	154936719	NM_001348696	Cluster1
chr1	154924739	154942658	NM_001323012	Cluster1
chr1	155051315	155062775	NM_001261464	Cluster1
chr1	155051315	155062775	NM_003815	Cluster1
chr1	155051315	155062775	NR_048577	Cluster1
chr1	154502218	154548147	NM_001098475	Cluster1
chr1	154697465	154870278	NM_001204087	Cluster1
chr1	154697457	154859876	NM_170782	Cluster1
chr1	155051315	155062775	NR_048578	Cluster1
chr1	154697457	154870281	NM_002249	Cluster1
chr1	155051315	155062775	NM_207196	Cluster1
chr1	154697465	154868070	NM_001365837	Cluster1
chr1	155045191	155063991	NR_040773	Cluster1
chr1	155051315	155062775	NR_048579	Cluster1
chr1	155335267	155562803	NM_018489	Cluster1
chr1	155749657	155859400	NM_001282856	Cluster1
chr1	155749659	155857214	NM_001282858	Cluster1
chr1	155946838	155978545	NM_001162384	Cluster1
chr1	155308865	155320665	NM_001135821	Cluster1
chr1	156082545	156137866	NM_001282625	Cluster1
chr1	155308865	155320665	NM_002004	Cluster1
chr1	155308865	155320665	NM_001135822	Cluster1
chr1	155946838	155978175	NM_004723	Cluster1
chr1	155689093	155739009	NM_033657	Cluster1
chr1	155308865	155320665	NM_001242824	Cluster1
chr1	155946838	155978175	NM_001350111	Cluster1
chr1	155308747	155320666	NM_001242825	Cluster1
chr1	155335267	155562803	NM_001366177	Cluster1
chr1	155689090	155739009	NM_004632	Cluster1
chr1	155749659	155857214	NM_001282860	Cluster1
chr1	155946838	155979560	NM_001350112	Cluster1
chr1	155689090	155739009	NM_001199851	Cluster1
chr1	155689090	155739009	NM_001199849	Cluster1
chr1	155689090	155739009	NM_001199850	Cluster1
chr1	155946853	155978547	NM_001162383	Cluster1
chr1	155946838	155979290	NM_001350110	Cluster1
chr1	155764455	155857214	NM_001282861	Cluster1
chr1	155764455	155857214	NM_032292	Cluster1
chr1	156934839	157045742	NM_014784	Cluster1
chr1	156934839	157045742	NM_198236	Cluster1
chr1	156463726	156500775	NM_005920	Cluster1
chr1	156934839	157045742	NM_001377419	Cluster1
chr1	156934839	157046903	NM_001377418	Cluster1
chr1	157676480	157700769	NR_135216	Cluster1
chr1	157993272	158100262	NM_001286349	Cluster1
chr1	157513376	157552515	NM_031281	Cluster1
chr1	157676480	157700769	NR_135215	Cluster1
chr1	157676480	157700769	NR_135214	Cluster1
chr1	157993644	158100262	NM_018240	Cluster1
chr1	157676480	157700769	NR_135217	Cluster1
chr1	157794403	157820120	NM_001159398	Cluster1
chr1	157676480	157700769	NM_001320333	Cluster1
chr1	157794403	157820120	NM_001159397	Cluster1
chr1	157513376	157552515	NM_001195388	Cluster1
chr1	157676480	157700769	NM_052939	Cluster1
chr1	158465561	158466503	NM_001004473	Cluster1
chr1	160288593	160343250	NM_004371	Cluster1
chr1	160151602	160186980	NM_144699	Cluster1
chr1	160037466	160070160	NM_002241	Cluster1
chr1	160288593	160343250	NM_001098398	Cluster1
chr1	160541093	160579516	NM_001184882	Cluster1
chr1	160541097	160579496	NM_001184881	Cluster1
chr1	160541097	160579496	NM_001184879	Cluster1
chr1	160541097	160579496	NM_001330742	Cluster1
chr1	160796173	160828255	NM_002348	Cluster1
chr1	161314380	161375340	NM_001035511	Cluster1
chr1	160796173	160828255	NM_001261456	Cluster1
chr1	161314380	161375340	NM_001278172	Cluster1
chr1	161314380	161375340	NM_001035513	Cluster1
chr1	161314380	161375340	NM_001035512	Cluster1
chr1	160796173	160828255	NM_001261457	Cluster1
chr1	160680421	160711851	NM_001256030	Cluster1
chr1	160541097	160579496	NM_003874	Cluster1
chr1	161070997	161089558	NM_030916	Cluster1
chr1	160678745	160711822	NM_001778	Cluster1
chr1	161314380	161375340	NR_103459	Cluster1
chr1	161314380	161363205	NM_003001	Cluster1
chr1	161983191	162024465	NM_015441	Cluster1
chr1	161983191	162024465	NM_001297713	Cluster1
chr1	162069690	162370475	NM_014697	Cluster1
chr1	161983191	162024465	NM_001347700	Cluster1
chr1	161766319	161964070	NM_007348	Cluster1
chr1	162069690	162370475	NM_001164757	Cluster1
chr1	162395267	162412136	NM_053282	Cluster1
chr1	163161674	163213023	NR_110699	Cluster1
chr1	163142298	163321791	NM_001254748	Cluster1
chr1	163142298	163202916	NM_001254749	Cluster1
chr1	162631974	162787405	NM_001354982	Cluster1
chr1	163304205	163321791	NR_045630	Cluster1
chr1	162632463	162787405	NM_006182	Cluster1
chr1	162790701	162812818	NM_016371	Cluster1
chr1	162630862	162787405	NM_001354983	Cluster1
chr1	163142298	163202916	NM_001195303	Cluster1
chr1	162632463	162787405	NM_001014796	Cluster1
chr1	165476841	165582155	NR_026744	Cluster1
chr1	165400921	165424984	NM_001256571	Cluster1
chr1	165400921	165445355	NM_001256570	Cluster1
chr1	165201866	165356241	NM_001174069	Cluster1
chr1	165400921	165445126	NM_006917	Cluster1
chr1	165201866	165356715	NM_177398	Cluster1
chr1	166055917	166166755	NM_001320302	Cluster1
chr1	166055917	166166755	NR_135199	Cluster1
chr1	166055917	166166755	NR_163271	Cluster1
chr1	167220885	167427340	NM_002697	Cluster1
chr1	167220885	167427340	NR_037163	Cluster1
chr1	167630231	167708696	NM_001322924	Cluster1
chr1	167630192	167708696	NM_001322923	Cluster1
chr1	167630231	167708696	NM_052862	Cluster1
chr1	167094074	167129165	NM_001080426	Cluster1
chr1	167430639	167518529	NM_000734	Cluster1
chr1	166839474	166856346	NM_017542	Cluster1
chr1	167220885	167427340	NM_001198786	Cluster1
chr1	167329069	167427340	NM_001198783	Cluster1
chr1	167630231	167643238	NR_136519	Cluster1
chr1	166975581	167022212	NM_001286378	Cluster1
chr1	167220884	167427345	NM_001365849	Cluster1
chr1	167220884	167427345	NM_001365848	Cluster1
chr1	166839474	166856346	NM_001314014	Cluster1
chr1	167430639	167518610	NM_198053	Cluster1
chr1	167936238	168075843	NM_001349774	Cluster1
chr1	167936238	168075843	NM_001349778	Cluster1
chr1	167936558	168075843	NM_001349775	Cluster1
chr1	167936558	168075843	NM_001349776	Cluster1
chr1	167936558	168075843	NM_001349777	Cluster1
chr1	167936558	168075843	NM_001349779	Cluster1
chr1	167936558	168075843	NM_001349780	Cluster1
chr1	167936558	168075843	NM_018442	Cluster1
chr1	167936558	168075843	NR_146228	Cluster1
chr1	167936558	168075843	NR_146229	Cluster1
chr1	167936558	168075843	NR_146230	Cluster1
chr1	167936558	168075843	NM_001198956	Cluster1
chr1	167809385	167914134	NM_001167749	Cluster1
chr1	167809385	167914134	NM_001297772	Cluster1
chr1	167936558	168075843	NM_001017977	Cluster1
chr1	167936558	168075843	NM_001349773	Cluster1
chr1	167936558	168075843	NM_001198957	Cluster1
chr1	167809385	167914134	NM_018417	Cluster1
chr1	168280876	168314426	NM_005149	Cluster1
chr1	168903904	169087005	NR_104091	Cluster1
chr1	169463910	169485944	NM_006996	Cluster1
chr1	169463910	169485970	NM_001319667	Cluster1
chr1	169588849	169630124	NM_003005	Cluster1
chr1	169921328	170068915	NM_001204517	Cluster1
chr1	170935470	171064765	NM_001163629	Cluster1
chr1	171485529	171593511	NM_015172	Cluster1
chr1	171700162	171742065	NM_001185127	Cluster1
chr1	173235059	173477155	NR_037845	Cluster1
chr1	173931083	173993072	NM_001300851	Cluster1
chr1	173799549	173824132	NM_001171182	Cluster1
chr1	173799549	173824639	NM_033319	Cluster1
chr1	173931083	173993072	NM_001300850	Cluster1
chr1	173799549	173824639	NM_001127181	Cluster1
chr1	173931083	173993072	NM_001300852	Cluster1
chr1	174159519	174995308	NR_158982	Cluster1
chr1	174159519	174246341	NR_158981	Cluster1
chr1	174159519	174958187	NM_001366447	Cluster1
chr1	174159519	174995308	NM_001366448	Cluster1
chr1	174799737	174995308	NM_001243765	Cluster1
chr1	174799737	174995308	NM_001330989	Cluster1
chr1	174799737	174995308	NM_001366456	Cluster1
chr1	174964777	174995308	NM_001243764	Cluster1
chr1	174799737	174958187	NM_001366455	Cluster1
chr1	174799737	174995308	NM_001366454	Cluster1
chr1	174159413	174958190	NM_014857	Cluster1
chr1	174159519	174995308	NM_001366446	Cluster1
chr1	174159519	174548561	NM_001366445	Cluster1
chr1	175315194	175743595	NM_001328635	Cluster1
chr1	175315194	175743595	NM_003285	Cluster1
chr1	176463174	176845601	NM_020318	Cluster1
chr1	176861063	177164712	NM_001364856	Cluster1
chr1	176857304	177164904	NM_001286164	Cluster1
chr1	176463174	176691205	NM_021936	Cluster1
chr1	176861066	177164712	NM_004319	Cluster1
chr1	176868817	177164904	NM_207108	Cluster1
chr1	177928787	178038007	NM_001356505	Cluster1
chr1	177928787	178038007	NM_001356506	Cluster1
chr1	177945334	178037976	NR_151492	Cluster1
chr1	179099330	179229677	NM_007314	Cluster1
chr1	179110580	179229684	NM_001136001	Cluster1
chr1	178513108	178523506	NM_001170722	Cluster1
chr1	179099330	179229677	NM_001168237	Cluster1
chr1	179099330	179229677	NM_001168236	Cluster1
chr1	179025803	179076574	NM_001324310	Cluster1
chr1	179026123	179076574	NM_001324311	Cluster1
chr1	178513108	178521811	NM_001170723	Cluster1
chr1	178513108	178522650	NM_032126	Cluster1
chr1	179099330	179229677	NM_001168238	Cluster1
chr1	178513108	178523506	NM_001170724	Cluster1
chr1	178725146	178921842	NM_001286247	Cluster1
chr1	179025893	179076567	NM_014864	Cluster1
chr1	179954809	180114875	NM_014810	Cluster1
chr1	179365970	179554735	NM_144696	Cluster1
chr1	179550538	179575948	NM_001297575	Cluster1
chr1	179550538	179575948	NM_014625	Cluster1
chr1	179366043	179554735	NR_073544	Cluster1
chr1	180972712	181023121	NM_001286210	Cluster1
chr1	180972724	181022870	NM_005819	Cluster1
chr1	181483516	181808084	NM_000721	Cluster1
chr1	181483516	181808084	NM_001205293	Cluster1
chr1	181483516	181808084	NM_001205294	Cluster1
chr1	182839346	182887982	NR_033302	Cluster1
chr1	183186263	183241294	NM_018891	Cluster1
chr1	183248236	183418380	NM_015039	Cluster1
chr1	183186263	183245127	NM_005562	Cluster1
chr1	183023419	183145592	NM_002293	Cluster1
chr1	182573633	182589256	NM_021133	Cluster1
chr1	182839346	182887982	NM_001357	Cluster1
chr1	183929661	184037728	NM_001303420	Cluster1
chr1	183636108	183928543	NM_001297670	Cluster1
chr1	183935834	184037728	NM_001303421	Cluster1
chr1	183805119	183928543	NM_001297671	Cluster1
chr1	183805119	183928543	NM_001297672	Cluster1
chr1	183636108	183928543	NM_001297669	Cluster1
chr1	183935834	184037728	NM_015101	Cluster1
chr1	185157059	185291781	NM_001105518	Cluster1
chr1	185045557	185102603	NM_007212	Cluster1
chr1	185157166	185291781	NM_017673	Cluster1
chr1	184791031	184974508	NM_052966	Cluster1
chr1	185734390	186190949	NM_031935	Cluster1
chr1	190097666	190476010	NM_001317188	Cluster1
chr1	193122030	193254812	NM_024529	Cluster1
chr1	193304744	193365953	NR_125789	Cluster1
chr1	193059611	193091219	NM_001173524	Cluster1
chr1	193059873	193091776	NM_001173525	Cluster1
chr1	193059873	193085985	NM_004600	Cluster1
chr1	193059873	193091776	NM_001042370	Cluster1
chr1	193059611	193091219	NM_001331020	Cluster1
chr1	193059873	193091776	NM_001042369	Cluster1
chr1	196225780	196608440	NM_001287819	Cluster1
chr1	196225780	196608440	NM_001287820	Cluster1
chr1	197268203	197478455	NM_001257966	Cluster1
chr1	197504748	197775480	NM_001195215	Cluster1
chr1	197917371	197935478	NM_020204	Cluster1
chr1	197201503	197478455	NM_001257965	Cluster1
chr1	197912504	197930143	NM_001014434	Cluster1
chr1	197917371	197932587	NM_001370213	Cluster1
chr1	200027709	200177415	NM_003822	Cluster1
chr1	200027709	200177415	NM_205860	Cluster1
chr1	200739571	200860703	NM_203459	Cluster1
chr1	200928943	200966668	NR_147176	Cluster1
chr1	201190823	201228952	NM_001367841	Cluster1
chr1	201039511	201112426	NM_000069	Cluster1
chr1	200404950	200410036	NM_001281294	Cluster1
chr1	200739571	200860703	NM_001297708	Cluster1
chr1	200739571	200860703	NM_001297707	Cluster1
chr1	200404950	200410036	NM_001281293	Cluster1
chr1	201190823	201228952	NM_001164586	Cluster1
chr1	201688255	201829559	NR_046696	Cluster1
chr1	201829156	201884290	NM_018085	Cluster1
chr1	202203711	202319761	NM_021636	Cluster1
chr1	202193989	202319761	NM_001017403	Cluster1
chr1	201648321	201826974	NM_020443	Cluster1
chr1	202214154	202319761	NM_001017404	Cluster1
chr1	202725184	202809470	NM_001314042	Cluster1
chr1	203127725	203167405	NM_001365066	Cluster1
chr1	203127725	203167405	NM_001365065	Cluster1
chr1	202590596	202643453	NM_001136504	Cluster1
chr1	203026490	203078736	NM_001304331	Cluster1
chr1	203127725	203167405	NM_001048230	Cluster1
chr1	202724496	202808421	NM_006618	Cluster1
chr1	203026490	203078736	NM_001304332	Cluster1
chr1	203127725	203167405	NM_000674	Cluster1
chr1	202590596	202710454	NM_177402	Cluster1
chr1	202725184	202809470	NM_001347591	Cluster1
chr1	203795622	203854124	NM_001319239	Cluster1
chr1	203795622	203854124	NM_014827	Cluster1
chr1	203795622	203854124	NM_001350266	Cluster1
chr1	204218852	204359929	NM_014935	Cluster1
chr1	203795622	203854124	NM_001350265	Cluster1
chr1	203795622	203854124	NM_001350263	Cluster1
chr1	203626831	203733629	NM_001365783	Cluster1
chr1	203627936	203733630	NM_001365784	Cluster1
chr1	203795622	203854124	NM_001350264	Cluster1
chr1	203626786	203744081	NM_001001396	Cluster1
chr1	203795622	203854124	NM_001319238	Cluster1
chr1	204198162	204213988	NM_198447	Cluster1
chr1	203795622	203854124	NM_001350262	Cluster1
chr1	203795622	203854124	NM_001350261	Cluster1
chr1	203626831	203744081	NM_001684	Cluster1
chr1	203795622	203854124	NM_001376334	Cluster1
chr1	203795622	203854124	NM_001376335	Cluster1
chr1	203795622	203854124	NM_001376336	Cluster1
chr1	203795622	203854124	NM_001376337	Cluster1
chr1	203795622	203854124	NM_001376338	Cluster1
chr1	203795622	203854124	NM_001376339	Cluster1
chr1	203795622	203854124	NM_001376340	Cluster1
chr1	203795622	203854124	NM_001376341	Cluster1
chr1	203795622	203854124	NM_001376342	Cluster1
chr1	203795622	203854124	NM_001376343	Cluster1
chr1	203795622	203854124	NM_001376344	Cluster1
chr1	203795622	203854124	NM_001376345	Cluster1
chr1	203795622	203854124	NM_001376346	Cluster1
chr1	203795622	203854124	NM_001376347	Cluster1
chr1	203795622	203854124	NM_001376348	Cluster1
chr1	203795622	203854124	NM_001376349	Cluster1
chr1	203795622	203854124	NM_001376350	Cluster1
chr1	203795622	203854124	NM_001376351	Cluster1
chr1	203795622	203854124	NM_001376352	Cluster1
chr1	203795622	203854124	NM_001376353	Cluster1
chr1	203795622	203854124	NM_001376354	Cluster1
chr1	203795622	203854124	NM_001376355	Cluster1
chr1	203795622	203854124	NM_001376356	Cluster1
chr1	203795622	203854124	NM_001376357	Cluster1
chr1	203795622	203854124	NM_001376358	Cluster1
chr1	203795622	203854124	NM_001376359	Cluster1
chr1	203795622	203854124	NM_001376360	Cluster1
chr1	203795622	203854124	NM_001376361	Cluster1
chr1	203795622	203854124	NM_001376362	Cluster1
chr1	203795622	203854124	NM_001376363	Cluster1
chr1	203795622	203854124	NM_001376364	Cluster1
chr1	203795622	203854124	NM_001376365	Cluster1
chr1	203795622	203854124	NM_001376367	Cluster1
chr1	203795622	203854124	NM_001376366	Cluster1
chr1	205228930	205273343	NM_001242925	Cluster1
chr1	205246495	205273343	NM_001297611	Cluster1
chr1	205256200	205273343	NM_001297613	Cluster1
chr1	204944225	205022822	NM_001160331	Cluster1
chr1	205229714	205273343	NM_001375651	Cluster1
chr1	205381378	205422056	NM_001199052	Cluster1
chr1	204828653	205022822	NM_001160332	Cluster1
chr1	205227945	205273343	NM_014858	Cluster1
chr1	205381378	205422056	NM_001199050	Cluster1
chr1	204828651	205022822	NM_001365986	Cluster1
chr1	205381378	205422056	NR_037583	Cluster1
chr1	204828651	204977146	NM_001160333	Cluster1
chr1	205381378	205422056	NM_001001552	Cluster1
chr1	205381378	205422056	NM_001199051	Cluster1
chr1	204828653	205022822	NM_015090	Cluster1
chr1	205229714	205273343	NM_001375652	Cluster1
chr1	204828651	204977146	NM_001005389	Cluster1
chr1	204828653	205022822	NM_001005388	Cluster1
chr1	205913047	205943460	NM_134325	Cluster1
chr1	205913051	205943456	NM_052934	Cluster1
chr1	206203540	206464436	NM_001170637	Cluster1
chr1	207088859	207099992	NM_001017365	Cluster1
chr1	206957966	206970460	NM_001170631	Cluster1
chr1	206957966	206970460	NM_001122979	Cluster1
chr1	207088859	207099992	NM_001017366	Cluster1
chr1	207321677	207360966	NM_001114752	Cluster1
chr1	206684904	206734281	NM_032960	Cluster1
chr1	207321677	207360966	NM_000574	Cluster1
chr1	207089238	207099992	NM_001017364	Cluster1
chr1	207321677	207360966	NM_001300903	Cluster1
chr1	206957966	206970625	NM_032029	Cluster1
chr1	206770772	206842981	NM_153758	Cluster1
chr1	207321677	207360966	NM_001300904	Cluster1
chr1	207454327	207489892	NM_001877	Cluster1
chr1	206684904	206734281	NM_004759	Cluster1
chr1	206828876	206842981	NM_013371	Cluster1
chr1	207454327	207489892	NM_001006658	Cluster1
chr1	207089282	207099992	NM_001017367	Cluster1
chr1	207321677	207360966	NR_125349	Cluster1
chr1	207089238	207099992	NM_000716	Cluster1
chr1	208022242	208244384	NM_025179	Cluster1
chr1	209583713	209613939	NM_020439	Cluster1
chr1	210328901	210676290	NM_018194	Cluster1
chr1	210328905	210676296	NM_001170588	Cluster1
chr1	209938216	210171389	NM_001146264	Cluster1
chr1	209938173	210164288	NM_001256006	Cluster1
chr1	210328905	210676296	NM_001170587	Cluster1
chr1	209827971	209857565	NM_014388	Cluster1
chr1	210232795	210246255	NM_019605	Cluster1
chr1	209938216	210171389	NR_027459	Cluster1
chr1	209938216	210171389	NM_001146262	Cluster1
chr1	209938173	210164288	NM_001146261	Cluster1
chr1	209938216	210171389	NM_153262	Cluster1
chr1	210329365	210676290	NM_001170580	Cluster1
chr1	210232795	210246631	NM_001354173	Cluster1
chr1	210328251	210676296	NM_001170564	Cluster1
chr1	210328251	210676296	NM_001122834	Cluster1
chr1	211382754	211432535	NR_026761	Cluster1
chr1	211259276	211313313	NM_001136225	Cluster1
chr1	211259276	211316383	NM_001136224	Cluster1
chr1	211259276	211316383	NM_001350069	Cluster1
chr1	211259276	211316383	NM_001350070	Cluster1
chr1	211675761	211687459	NR_148994	Cluster1
chr1	211259276	211316383	NM_001136223	Cluster1
chr1	211940398	212035660	NM_001199809	Cluster1
chr1	211940398	212035660	NM_001199812	Cluster1
chr1	211940398	212035660	NR_037667	Cluster1
chr1	212726152	212791777	NM_001297739	Cluster1
chr1	211940402	212035557	NM_015434	Cluster1
chr1	212726152	212791777	NM_001297736	Cluster1
chr1	212726152	212791777	NM_001297737	Cluster1
chr1	212301857	212361853	NM_001199756	Cluster1
chr1	211940398	212035660	NM_001199811	Cluster1
chr1	212035552	212105006	NM_001286229	Cluster1
chr1	212035552	212105006	NM_001286230	Cluster1
chr1	212565333	212620777	NM_001030287	Cluster1
chr1	213051240	213274774	NM_012424	Cluster1
chr1	213051232	213274774	NM_001287218	Cluster1
chr1	213051232	213274774	NM_001287219	Cluster1
chr1	213051232	213274774	NM_001287220	Cluster1
chr1	213051232	213274774	NM_001287221	Cluster1
chr1	213051232	213274774	NM_001349646	Cluster1
chr1	213051232	213274774	NM_001349647	Cluster1
chr1	213051232	213274774	NM_001349648	Cluster1
chr1	213051232	213274774	NM_001349649	Cluster1
chr1	213051232	213274774	NM_001349650	Cluster1
chr1	213051232	213274774	NM_001349651	Cluster1
chr1	213051232	213274774	NM_001349652	Cluster1
chr1	213051232	213274774	NM_001349653	Cluster1
chr1	213051232	213274774	NM_001349654	Cluster1
chr1	213051232	213274774	NM_001349657	Cluster1
chr1	213051232	213274774	NM_001349658	Cluster1
chr1	213051232	213274774	NM_001349659	Cluster1
chr1	213051232	213274774	NM_001349660	Cluster1
chr1	213051232	213274774	NM_001349661	Cluster1
chr1	213051232	213274774	NM_001349662	Cluster1
chr1	213051232	213274774	NM_001349663	Cluster1
chr1	213051232	213274774	NM_001349664	Cluster1
chr1	213051232	213274774	NM_001349665	Cluster1
chr1	213051232	213274774	NM_001349666	Cluster1
chr1	213051232	213274774	NM_001349667	Cluster1
chr1	213051232	213274774	NM_001349668	Cluster1
chr1	213051232	213274774	NM_001349669	Cluster1
chr1	213051232	213274774	NM_001349670	Cluster1
chr1	213051232	213274774	NM_001349671	Cluster1
chr1	213051232	213274774	NM_001349672	Cluster1
chr1	213051232	213274774	NR_146207	Cluster1
chr1	213051232	213274774	NR_146208	Cluster1
chr1	213051232	213274774	NR_146209	Cluster1
chr1	213051232	213274774	NR_146210	Cluster1
chr1	213051232	213274774	NM_001136138	Cluster1
chr1	214281158	214337131	NM_020197	Cluster1
chr1	214348701	214551602	NM_005401	Cluster1
chr1	215082736	215237090	NM_014217	Cluster1
chr1	215082736	215237090	NM_001017425	Cluster1
chr1	215005541	215237090	NM_001017424	Cluster1
chr1	216503245	216723472	NM_001243519	Cluster1
chr1	216503250	216723429	NM_001243518	Cluster1
chr1	216503250	216723429	NM_001243515	Cluster1
chr1	216503250	216805385	NM_001243514	Cluster1
chr1	216503245	216939673	NM_001243513	Cluster1
chr1	216503245	216939673	NM_001243512	Cluster1
chr1	218437632	219108110	NR_031644	Cluster1
chr1	219435157	219557324	NR_135822	Cluster1
chr1	219910444	219959098	NM_001376929	Cluster1
chr1	220057481	220089788	NM_001286149	Cluster1
chr1	220057481	220089788	NM_006085	Cluster1
chr1	220057481	220089853	NM_001286151	Cluster1
chr1	220057481	220089853	NM_001286150	Cluster1
chr1	220528135	220664460	NM_001286128	Cluster1
chr1	220528135	220664460	NM_018650	Cluster1
chr1	220528182	220664457	NM_001286124	Cluster1
chr1	220528182	220664457	NM_001286126	Cluster1
chr1	222815038	223005995	NM_001377229	Cluster1
chr1	222815038	223005995	NM_032890	Cluster1
chr1	222815080	223005995	NM_001377228	Cluster1
chr1	222668012	222712491	NM_022831	Cluster1
chr1	222815038	223005995	NM_001350630	Cluster1
chr1	222928423	223005995	NM_001369594	Cluster1
chr1	222815038	222837384	NR_165109	Cluster1
chr1	222815038	222837384	NR_165110	Cluster1
chr1	222815038	222837384	NR_165114	Cluster1
chr1	222815038	222837384	NR_165116	Cluster1
chr1	222815038	222837384	NR_165118	Cluster1
chr1	222815038	222837384	NR_165119	Cluster1
chr1	222815038	222837384	NR_165120	Cluster1
chr1	222815038	222837384	NR_165121	Cluster1
chr1	222815038	222837384	NR_165122	Cluster1
chr1	222815038	222837384	NR_165123	Cluster1
chr1	222815038	222837384	NR_165124	Cluster1
chr1	222815038	222837384	NR_165125	Cluster1
chr1	222815038	222837384	NR_165126	Cluster1
chr1	222815038	222837384	NR_165127	Cluster1
chr1	222815038	222837384	NR_165128	Cluster1
chr1	222815038	222837384	NR_165129	Cluster1
chr1	222815038	222837384	NR_165130	Cluster1
chr1	222815038	222837384	NR_165131	Cluster1
chr1	222815038	222837384	NR_165132	Cluster1
chr1	222815038	222837384	NR_165133	Cluster1
chr1	222815038	222837384	NR_165134	Cluster1
chr1	222815038	222837384	NR_165135	Cluster1
chr1	222815038	222837384	NR_165136	Cluster1
chr1	222815038	222837384	NR_165137	Cluster1
chr1	222815038	222837384	NR_165138	Cluster1
chr1	222815038	222837384	NR_165139	Cluster1
chr1	222815080	222837384	NR_165140	Cluster1
chr1	222815080	222837384	NR_165141	Cluster1
chr1	222815080	222837384	NR_165142	Cluster1
chr1	222815080	222837384	NR_165143	Cluster1
chr1	222815080	222837384	NR_165144	Cluster1
chr1	222815080	222837384	NR_165145	Cluster1
chr1	222815080	222837384	NR_165146	Cluster1
chr1	222815080	222837384	NR_165147	Cluster1
chr1	222815080	222837384	NR_165148	Cluster1
chr1	222815080	222837384	NR_165149	Cluster1
chr1	222815080	222837384	NR_165150	Cluster1
chr1	222815080	222837384	NR_165151	Cluster1
chr1	222815080	222837384	NR_165152	Cluster1
chr1	222815080	222837384	NR_165153	Cluster1
chr1	222815080	222837384	NR_165154	Cluster1
chr1	222815080	222837384	NR_165155	Cluster1
chr1	222815356	222837384	NR_165156	Cluster1
chr1	222815356	222837384	NR_165157	Cluster1
chr1	223992729	224010607	NR_136590	Cluster1
chr1	223992729	224010607	NR_136591	Cluster1
chr1	223992729	224010607	NR_136592	Cluster1
chr1	223992729	224033859	NR_136593	Cluster1
chr1	224227333	224330189	NM_206840	Cluster1
chr1	223701592	223776018	NM_001146068	Cluster1
chr1	224114110	224162047	NM_001136115	Cluster1
chr1	223541615	223665701	NM_001143962	Cluster1
chr1	224227333	224330189	NM_001243147	Cluster1
chr1	224227344	224330172	NM_002533	Cluster1
chr1	224227333	224330189	NM_001243146	Cluster1
chr1	224114110	224162047	NR_049764	Cluster1
chr1	224114110	224162047	NM_015176	Cluster1
chr1	223712538	223776018	NM_001748	Cluster1
chr1	224616316	224740554	NM_001322305	Cluster1
chr1	224434848	224740554	NM_001322304	Cluster1
chr1	224434639	224740549	NR_136288	Cluster1
chr1	224434639	224740549	NR_136289	Cluster1
chr1	224434639	224740549	NR_136290	Cluster1
chr1	224434848	224740554	NR_136291	Cluster1
chr1	224434848	224740554	NR_136293	Cluster1
chr1	224434848	224740554	NR_136292	Cluster1
chr1	224434848	224740554	NR_136297	Cluster1
chr1	224616316	224740554	NM_152495	Cluster1
chr1	224434848	224740554	NR_136295	Cluster1
chr1	224434848	224740554	NR_136296	Cluster1
chr1	224616316	224740554	NR_136287	Cluster1
chr1	224434848	224740554	NR_136294	Cluster1
chr1	224434848	224740554	NM_001322302	Cluster1
chr1	224434848	224740554	NM_001322303	Cluster1
chr1	224929674	225399286	NM_001367479	Cluster1
chr1	225810133	225845561	NM_001291163	Cluster1
chr1	225810073	225845561	NM_001136018	Cluster1
chr1	225825353	225845561	NM_000120	Cluster1
chr1	226360690	226408093	NM_001618	Cluster1
chr1	226870571	226896103	NM_012486	Cluster1
chr1	226870615	226896098	NM_000447	Cluster1
chr1	227563555	227679669	NR_102302	Cluster1
chr1	228208043	228361250	NM_052843	Cluster1
chr1	227918655	227947932	NM_003395	Cluster1
chr1	228208129	228378874	NM_001271223	Cluster1
chr1	228208129	228378874	NM_001098623	Cluster1
chr1	228644646	228746669	NR_037962	Cluster1
chr1	230067237	230282122	NM_004481	Cluster1
chr1	230314489	230426332	NM_001258311	Cluster1
chr1	231528652	231702561	NR_028399	Cluster1
chr1	231591291	231612090	NR_034037	Cluster1
chr1	231338292	231355023	NM_032018	Cluster1
chr1	230906242	230978861	NM_001122835	Cluster1
chr1	231338292	231355023	NM_001010984	Cluster1
chr1	231338292	231355023	NM_001261462	Cluster1
chr1	231162927	231221564	NM_001300889	Cluster1
chr1	230906242	230978861	NM_024525	Cluster1
chr1	231162927	231221564	NM_001004342	Cluster1
chr1	230906242	230978861	NM_001376507	Cluster1
chr1	230906242	230978861	NM_001376508	Cluster1
chr1	230906242	230978861	NM_001376509	Cluster1
chr1	230906242	230978861	NM_001376510	Cluster1
chr1	230906242	230978861	NM_001376511	Cluster1
chr1	230906242	230978861	NM_001376512	Cluster1
chr1	230906242	230978861	NM_001376513	Cluster1
chr1	230906242	230978861	NM_001376514	Cluster1
chr1	232983434	233295725	NM_014801	Cluster1
chr1	234214210	234324518	NM_001300845	Cluster1
chr1	233904675	234324511	NM_173508	Cluster1
chr1	235367359	235448968	NM_001287802	Cluster1
chr1	235166901	235328179	NM_031371	Cluster1
chr1	235131182	235161250	NM_015014	Cluster1
chr1	235131182	235161250	NR_027762	Cluster1
chr1	235661040	235866906	NM_000081	Cluster1
chr1	235367426	235452443	NM_003193	Cluster1
chr1	235661030	235883708	NM_001301365	Cluster1
chr1	235131182	235161250	NM_001346738	Cluster1
chr1	235367426	235452443	NM_001079515	Cluster1
chr1	235166901	235328179	NR_135074	Cluster1
chr1	235367426	235452443	NM_001287801	Cluster1
chr1	235131182	235161250	NR_144492	Cluster1
chr1	235131182	235161250	NR_144491	Cluster1
chr1	235131182	235161250	NR_144490	Cluster1
chr1	235166894	235327487	NM_001206794	Cluster1
chr1	235166901	235328179	NM_016374	Cluster1
chr1	236142538	236208907	NM_003272	Cluster1
chr1	236795280	236903981	NM_001291939	Cluster1
chr1	236795291	236903981	NM_001291940	Cluster1
chr1	236795280	236903981	NM_000254	Cluster1
chr1	236394285	236484930	NM_145861	Cluster1
chr1	236686498	236764627	NM_001278343	Cluster1
chr1	235975831	236065090	NM_002508	Cluster1
chr1	236686453	236764627	NM_001103	Cluster1
chr1	236549004	236604516	NM_018072	Cluster1
chr1	236686453	236764627	NM_001278344	Cluster1
chr1	236395412	236484905	NM_080738	Cluster1
chr1	237862174	237928319	NR_027247	Cluster1
chr1	239386567	239915449	NM_001347716	Cluster1
chr1	239629072	239915449	NM_000740	Cluster1
chr1	239386567	239886598	NR_164748	Cluster1
chr1	239386567	239915449	NM_001375982	Cluster1
chr1	239386567	239915449	NM_001375981	Cluster1
chr1	239386567	239915449	NM_001375980	Cluster1
chr1	239386567	239915449	NM_001375979	Cluster1
chr1	239386567	239915449	NM_001375978	Cluster1
chr1	239386567	239915449	NM_001375984	Cluster1
chr1	239386567	239915449	NM_001375983	Cluster1
chr1	239386567	239915449	NM_001375985	Cluster1
chr1	241532377	241595642	NM_003679	Cluster1
chr1	241652280	241802777	NM_001367482	Cluster1
chr1	243917401	244047318	NR_033883	Cluster1
chr1	243499718	243843584	NM_001206729	Cluster1
chr1	243499723	243851079	NM_001370074	Cluster1
chr1	244835305	244845063	NM_001312871	Cluster1
chr1	244461272	244640504	NM_001130957	Cluster1
chr1	244408491	244452060	NM_001365073	Cluster1
chr1	245749346	245988551	NM_001375966	Cluster1
chr1	245749346	245988551	NM_001375965	Cluster1
chr1	245749346	246355540	NM_001375963	Cluster1
chr1	247034636	247078811	NM_001204220	Cluster1
chr1	246945546	247078813	NR_037894	Cluster1
chr1	247034636	247078811	NM_033213	Cluster1
chr1	246540560	246566261	NM_022366	Cluster1
chr1	247937028	248100922	NM_175911	Cluster1
chr1	247937028	248100922	NM_001304535	Cluster1
chr1	14361	29370	NR_024540	Cluster1
chr1	764864	778688	NR_033908	Cluster1
chr1	827590	843604	NR_047526	Cluster1
chr1	827590	859446	NR_047519	Cluster1
chr1	827590	859446	NR_047521	Cluster1
chr1	827590	859446	NR_047523	Cluster1
chr1	827590	859446	NR_047524	Cluster1
chr1	827797	859446	NR_047525	Cluster1
chr1	966481	975865	NM_001160184	Cluster1
chr1	966481	975865	NM_032129	Cluster1
chr1	975197	981173	NM_001369898	Cluster1
chr1	925730	944574	NM_152486	Cluster1
chr1	966481	975865	NM_001367552	Cluster1
chr1	944202	959256	NM_015658	Cluster1
chr1	975197	982093	NM_001369897	Cluster1
chr1	1081822	1116089	NM_017891	Cluster1
chr1	1081822	1116089	NM_001330306	Cluster1
chr1	1081822	1116089	NM_001363525	Cluster1
chr1	1216930	1232001	NM_016176	Cluster1
chr1	1292390	1307930	NM_030649	Cluster1
chr1	1253911	1273854	NM_058167	Cluster1
chr1	1280435	1292029	NR_037668	Cluster1
chr1	1280435	1292025	NM_001130413	Cluster1
chr1	1253911	1273854	NM_194457	Cluster1
chr1	1253911	1273854	NM_194458	Cluster1
chr1	1216907	1232067	NM_016547	Cluster1
chr1	1253911	1273854	NM_194315	Cluster1
chr1	1352688	1358794	NM_001282584	Cluster1
chr1	1311584	1324687	NM_001256456	Cluster1
chr1	1373735	1375207	NM_001127229	Cluster1
chr1	1352690	1361799	NM_001282583	Cluster1
chr1	1418419	1421276	NM_001243535	Cluster1
chr1	1385710	1399335	NM_001320155	Cluster1
chr1	1373735	1375207	NM_001127230	Cluster1
chr1	1418419	1421276	NM_001243536	Cluster1
chr1	1311599	1324660	NM_001256463	Cluster1
chr1	1385710	1399335	NM_001350499	Cluster1
chr1	1335277	1349418	NM_004421	Cluster1
chr1	1385710	1399335	NM_001320153	Cluster1
chr1	1385710	1398342	NM_001350497	Cluster1
chr1	1385710	1399335	NM_001350498	Cluster1
chr1	1392287	1399342	NM_001039577	Cluster1
chr1	1352688	1363541	NM_001282582	Cluster1
chr1	1385710	1399335	NR_135154	Cluster1
chr1	1335277	1349418	NM_001330311	Cluster1
chr1	1311584	1324687	NM_001256460	Cluster1
chr1	1311584	1324687	NM_001256462	Cluster1
chr1	1352688	1358547	NM_001282585	Cluster1
chr1	1426127	1427787	NM_001146685	Cluster1
chr1	1385710	1399335	NM_001350500	Cluster1
chr1	1385710	1399335	NM_030937	Cluster1
chr1	1418419	1421444	NM_001145210	Cluster1
chr1	1311599	1324660	NM_017871	Cluster1
chr1	1385710	1399335	NR_146722	Cluster1
chr1	1385710	1399335	NR_146723	Cluster1
chr1	1471764	1497848	NM_031921	Cluster1
chr1	1512161	1534685	NM_001170535	Cluster1
chr1	1534777	1540624	NM_001114748	Cluster1
chr1	1512529	1534687	NM_001170536	Cluster1
chr1	1512161	1534685	NM_018188	Cluster1
chr1	1477848	1497848	NM_001317238	Cluster1
chr1	1449688	1470162	NM_001039211	Cluster1
chr1	1635224	1659004	NM_033489	Cluster1
chr1	1635224	1659004	NM_033490	Cluster1
chr1	1635224	1659004	NM_033487	Cluster1
chr1	1635224	1659004	NM_033486	Cluster1
chr1	1661477	1692795	NM_001290264	Cluster1
chr1	1635224	1659004	NM_001787	Cluster1
chr1	1615854	1630605	NM_001170689	Cluster1
chr1	1615499	1630605	NM_001170687	Cluster1
chr1	1615414	1630610	NM_001170688	Cluster1
chr1	1615499	1630605	NM_001170686	Cluster1
chr1	1615499	1630605	NM_080875	Cluster1
chr1	1661477	1692795	NM_001110781	Cluster1
chr1	1635224	1659004	NM_001291345	Cluster1
chr1	1615499	1630605	NR_033183	Cluster1
chr1	1724837	1745999	NM_001199787	Cluster1
chr1	1751231	1778816	NM_001198993	Cluster1
chr1	1751231	1780031	NM_001198994	Cluster1
chr1	1751231	1758642	NM_001198995	Cluster1
chr1	1751231	1778470	NM_023018	Cluster1
chr1	1727384	1745999	NM_182838	Cluster1
chr1	1751231	1778470	NM_001353642	Cluster1
chr1	1751231	1780031	NM_001353641	Cluster1
chr1	2019344	2030758	NM_000815	Cluster1
chr1	2184459	2194775	NM_001282673	Cluster1
chr1	2184459	2207733	NM_001146310	Cluster1
chr1	2189548	2194775	NM_001256947	Cluster1
chr1	2191894	2194775	NM_001256946	Cluster1
chr1	2184459	2194775	NM_001256945	Cluster1
chr1	2189548	2212720	NM_001282670	Cluster1
chr1	2184459	2194775	NM_001282672	Cluster1
chr1	2184459	2194775	NM_001282671	Cluster1
chr1	2104715	2185399	NM_001033582	Cluster1
chr1	2228318	2310213	NM_003036	Cluster1
chr1	2391840	2405436	NM_007033	Cluster1
chr1	2403973	2413827	NM_001374426	Cluster1
chr1	2374853	2391554	NR_125361	Cluster1
chr1	2403973	2413827	NM_001374427	Cluster1
chr1	2403973	2413827	NR_164636	Cluster1
chr1	2566534	2584534	NR_121638	Cluster1
chr1	2586776	2591468	NM_001195741	Cluster1
chr1	2556364	2565622	NM_001297605	Cluster1
chr1	2508536	2526596	NM_018216	Cluster1
chr1	2586776	2591468	NM_001195736	Cluster1
chr1	2586776	2591468	NM_001195737	Cluster1
chr1	2586776	2591468	NM_001195738	Cluster1
chr1	2586776	2591468	NM_001195740	Cluster1
chr1	3454664	3481113	NM_014448	Cluster1
chr1	3630769	3650103	NM_017818	Cluster1
chr1	3772786	3775982	NM_001163724	Cluster1
chr1	3778558	3796498	NM_020710	Cluster1
chr1	3690671	3736201	NM_001204190	Cluster1
chr1	3690671	3736201	NM_001204189	Cluster1
chr1	3690671	3736201	NM_001204191	Cluster1
chr1	3752449	3771645	NM_152492	Cluster1
chr1	3698045	3736201	NM_001204192	Cluster1
chr1	3690671	3736201	NM_001126241	Cluster1
chr1	3690671	3736201	NM_001126242	Cluster1
chr1	3690671	3736201	NM_001126240	Cluster1
chr1	3735983	3747373	NR_033708	Cluster1
chr1	3735983	3746771	NR_033712	Cluster1
chr1	3735983	3747373	NR_033711	Cluster1
chr1	3735983	3747373	NR_033709	Cluster1
chr1	3735983	3747373	NR_033710	Cluster1
chr1	3900403	3915447	NR_024455	Cluster1
chr1	3857475	3885429	NR_135152	Cluster1
chr1	3857475	3885429	NR_135151	Cluster1
chr1	3857475	3885429	NR_135150	Cluster1
chr1	3812085	3857211	NM_014704	Cluster1
chr1	3889132	3900272	NM_207356	Cluster1
chr1	3857475	3885429	NM_004402	Cluster1
chr1	3857475	3885429	NM_001320132	Cluster1
chr1	3857475	3885429	NM_001320136	Cluster1
chr1	3857475	3885429	NR_104222	Cluster1
chr1	3857266	3885429	NM_001282669	Cluster1
chr1	3940611	3952583	NR_040065	Cluster1
chr1	4412050	4424684	NR_027088	Cluster1
chr1	4571486	4583704	NR_147025	Cluster1
chr1	6045887	6101180	NM_001199863	Cluster1
chr1	6045887	6101180	NM_001199862	Cluster1
chr1	6034687	6101180	NM_001199860	Cluster1
chr1	6206118	6221299	NM_207396	Cluster1
chr1	6221192	6235964	NM_012405	Cluster1
chr1	6244178	6245578	NM_001024598	Cluster1
chr1	6185019	6199595	NM_000983	Cluster1
chr1	6247352	6261098	NM_207370	Cluster1
chr1	6424775	6460944	NM_001367474	Cluster1
chr1	6466091	6497096	NM_001265592	Cluster1
chr1	6424775	6460944	NM_031475	Cluster1
chr1	6466091	6490580	NM_001265594	Cluster1
chr1	6424775	6460944	NM_001367473	Cluster1
chr1	6466091	6491667	NM_020631	Cluster1
chr1	6466091	6485469	NM_001265593	Cluster1
chr1	6466091	6485954	NM_001042665	Cluster1
chr1	6464110	6466195	NM_001039664	Cluster1
[truncated: 92,974 more rows]

## Sheet: WT v UBE2B Null1, WT up
Chromosome	Start	End	Mean Concentration of Reads in WT	Mean Concentration of Reads in UBE2B Null1	Fold	p-value	FDR	Gene Start	Gene End	SYMBOL
chr13	18211781	18213725	-0.16	10.94	-11.1	9.64e-21	5.38e-17	18211959	18230481	FAM230C
chr21	8221608	8249229	-0.16	9.48	-9.64	7.83e-17	2.19e-13	8249505	8249596	MIR6724-1
chr21	8217652	8220807	-0.16	8.87	-9.03	1.45e-15	2.69e-12	8212572	8212724	RNA5-8SN4
chr21	10325339	10326390	-0.16	8.15	-8.31	2.34e-12	3.26e-09	10413477	10452529	BAGE2
chr21	8404551	8431707	-0.16	7.09	-7.25	2.54e-10	2.83e-07	8432530	8432621	MIR6724-1
chr5	141176630	141179759	-0.16	6.95	-7.11	1.16e-09	9.22e-07	141177790	141180539	PCDHB8
chr12	53254	54745	-0.16	6.16	-6.33	1.71e-07	0.000119	66767	178455	IQSEC3
chr1	144103502	144104763	-0.16	6.19	-6.35	2.57e-07	0.000159	143975087	144068350	SRGAP2D
chr1_KI270713v1_random	28229	30432	-0.16	5.99	-6.15	3.92e-07	0.000219	21861	22024	RNVU1-18
chr22	11351882	11354294	-0.16	5.94	-6.1	4.43e-07	0.000225	10939388	10961338	FRG1FP
chr2	90295217	90296642	0.23	5.58	-5.36	3.41e-06	0.00159	89622213	89640635	LOC101927050
chr2	91501900	91503931	-0.16	5.46	-5.62	4.86e-06	0.00209	91636688	91655378	LSP1P4
chrUn_GL000195v1	68312	68837	-0.16	5.29	-5.46	1.9e-05	0.0072	42939	49164	LOC389831
chr2	87397849	87399253	-0.16	5.16	-5.32	1.94e-05	0.0072	87454781	87630751	CYTOR
chr3	75702837	75704837	0.3	5.39	-5.09	2.22e-05	0.0075	75674413	75676625	LINC00960
chr16	22648347	22649772	-0.16	5.28	-5.44	2.28e-05	0.0075	22546964	22576682	OTOAP1
chr1_KI270713v1_random	26249	27028	-0.16	5.14	-5.3	3.23e-05	0.01	21861	22024	RNVU1-18
chr2	91601817	91603607	-0.16	5.01	-5.17	3.85e-05	0.0113	91636688	91655378	LSP1P4
chr16	22639764	22640853	0.64	5.27	-4.63	4.2e-05	0.0117	22546964	22576682	OTOAP1
chr21	9020772	9021645	-0.16	4.99	-5.15	4.63e-05	0.0121	8986999	8987178	MIR3648-1
chr14_GL000194v1_random	182135	183073	-0.16	4.93	-5.09	4.77e-05	0.0121	53594	115055	MAFIP
chr20	30929644	30931108	0.3	5.19	-4.89	5.4e-05	0.0131	31257664	31259632	DEFB115
chr2	89764627	89765525	1.22	5.53	-4.32	6.65e-05	0.0155	89622213	89640635	LOC101927050
chr21	12981790	12983656	-0.16	4.97	-5.13	7.2e-05	0.0161	13038160	13052118	ANKRD30BP2
chr22	12366655	12369883	1.18	5.61	-4.43	8.16e-05	0.0175	11827523	11910358	LOC102723769
chr1	122897482	122898129	-0.16	4.82	-4.98	9.13e-05	0.0189	121519345	121568791	EMBP1
chr3	86424691	86425242	-0.16	4.82	-4.98	0.000126	0.0235	86481943	86496996	LINC02070
chr21	7301961	7302651	-0.16	4.61	-4.78	0.000161	0.028	7430659	7467182	LOC102724951
chr9	66807893	66809666	-0.16	5.39	-5.55	0.000172	0.028	66856426	66919359	ZNF658
chr20	30838278	30840068	2.21	6.25	-4.05	0.000174	0.028	31257664	31259632	DEFB115
chr12	8133800	8134580	0.23	4.76	-4.53	0.000176	0.028	8133772	8134849	POU5F1P3
chr17	36418898	36420624	-0.16	4.66	-4.82	0.000245	0.036	36428618	36439566	TBC1D3F
chr2	135117500	135117747	-0.16	4.55	-4.72	0.000245	0.036	135124080	135130705	RAB3GAP1
chr22	11318996	11319958	-0.16	4.48	-4.64	0.000253	0.0362	10939388	10961338	FRG1FP
chr17	22146767	22147032	-0.16	4.38	-4.54	0.000322	0.0449	22202995	22205154	UBBP4

## Sheet: WT v UBE2B Null1, WT down
Chromosome	Start	End	Mean Concentration of Reads in WT	Mean Concentration of Reads in UBE2B Null1	Fold	p-value	FDR	Gene Start	Gene End	SYMBOL
chr1	124119208	124120574	5.53	-0.26	5.79	9.56e-05	0.0191	121519345	121568791	EMBP1
chr22	15835439	15836022	4.83	-0.26	5.09	0.000125	0.0235	15805812	15820884	BMS1P22
chr14	18976956	18978574	4.47	-0.26	4.73	0.000348	0.0474	18977180	18980742	LOC100508046

## Sheet: WT v UBE2B Null2, WT up
Chromosome	Start	End	Mean Concentration of Reads in WT	Mean Concentration of Reads in UBE2B Null2	Fold	p-value	FDR	Gene Start	Gene End	SYMBOL
chr13	18211781	18213725	-0.16	11.12	-11.28	5.61e-19	2.76e-15	18211959	18230481	FAM230C
chr21	8221608	8249229	-0.16	9.1	-9.27	1.12e-14	2.76e-11	8249505	8249596	MIR6724-1
chr21	10325339	10326390	-0.16	8.3	-8.46	7.4e-12	1.21e-08	10413477	10452529	BAGE2
chr5	141176630	141179759	-0.16	6.47	-6.63	5.49e-08	5.8e-05	141177790	141180539	PCDHB8
chr21	8217652	8220807	-0.16	7.46	-7.62	5.9e-08	5.8e-05	8212572	8212724	RNA5-8SN4
chr21	8404551	8431707	-0.16	6.5	-6.66	1.35e-07	0.00011	8432530	8432621	MIR6724-1
chr9	40943252	40944937	-0.16	5.68	-5.84	3.49e-06	0.00214	40929010	40929092	MIR1299
chr22	11351882	11354294	-0.16	5.49	-5.65	1.17e-05	0.00626	10939388	10961338	FRG1FP
chr5	141174636	141176031	-0.16	5.89	-6.05	1.27e-05	0.00626	141177790	141180539	PCDHB8
chr20	30929644	30931108	0.3	5.56	-5.26	1.9e-05	0.00849	31257664	31259632	DEFB115
chr9	66807893	66809666	-0.16	5.17	-5.34	4.31e-05	0.0148	66856426	66919359	ZNF658
chr22	10964300	10965934	0.23	5.24	-5.02	4.51e-05	0.0148	10939388	10961338	FRG1FP
chr9	62803478	62805954	-0.16	5.51	-5.67	6.69e-05	0.0194	62802789	62813486	LINC01410
chr21	9020772	9021645	-0.16	4.98	-5.14	7.35e-05	0.0201	8986999	8987178	MIR3648-1
chr22	10927983	10928866	-0.16	4.96	-5.12	9.39e-05	0.0236	10939388	10961338	FRG1FP
chr1	144103502	144104763	-0.16	4.96	-5.12	9.81e-05	0.0236	143975087	144068350	SRGAP2D
chr6	365834	366332	-0.16	4.89	-5.05	0.000102	0.0236	391752	396074	IRF4
chr2	91501900	91503931	-0.16	5.12	-5.28	0.000109	0.0236	91636688	91655378	LSP1P4
chr20	29063659	29064606	-0.16	4.73	-4.89	0.000162	0.0332	29080390	29102761	FRG1DP
chr21	12981790	12983656	-0.16	4.75	-4.91	0.00018	0.0355	13038160	13052118	ANKRD30BP2
chr14_GL000194v1_random	182135	183073	-0.16	4.72	-4.88	0.000216	0.0379	53594	115055	MAFIP
chr13	16110919	16112759	-0.16	4.78	-4.94	0.000255	0.0391	18195297	18232024	FAM230C
chr15	20654102	20655811	-0.16	4.57	-4.73	0.000274	0.0409	20664725	20671271	NBEAP1

## Sheet: WT v UBE2B Null2, WT down
Chromosome	Start	End	Mean Concentration of Reads in WT	Mean Concentration of Reads in UBE2B Null2	Fold	p-value	FDR	Gene Start	Gene End	SYMBOL
chr1	123511869	123515270	6.11	-0.31	6.42	1.17e-06	0.000824	121519345	121568791	EMBP1
chr20	29694710	29695863	5.14	-0.31	5.45	3.06e-05	0.0126	29548661	29559705	FAM242B
chr22_KI270733v1_random	118495	125255	5.96	-0.31	6.27	3.38e-05	0.0128	128877	129029	RNA5-8SN4
chr22	11306815	11307605	4.91	-0.31	5.22	6.29e-05	0.0193	10939388	10961338	FRG1FP
chr13	16235775	16238485	5.67	1.21	4.46	0.000197	0.0359	18195297	18232024	FAM230C
chr22	15747891	15749024	4.55	-0.31	4.86	0.000197	0.0359	15746630	15778297	PSLNR
chr11	581191	581936	5.3	-0.31	5.61	0.000231	0.0386	576521	611964	PHRF1
chr19	37288839	37291989	4.84	-0.31	5.15	0.000244	0.0386	37235507	37304340	LOC284412

## Sheet: Sarcomere Metagene
ACTN2
AHNAK2
AKAP6
ANK2
ANK3
ASPH
ATP2A2
BVES
CACNA1C
CACNA2D1
CACNB2
CAMK2D
CASQ1
CFL2
CMYA5
CORIN
COX5A
COX7B
CTNNB1
DMD
DTNA
FBXO32
FERMT2
FHOD3
FLNC
HOMER1
ITGB1
ITGB1BP2
KAT2B
KCNH2
KRT8
LAMA2
LDB3
LMOD1
LMOD2
MYBPC3
MYL12B
MYL4
MYL6
MYL7
MYO18B
MYOM1
MYOZ2
NEBL
NEXN
NPPA
OBSCN
PALLD
PGM5
PLN
POPDC2
PPP1R12B
RYR2
SLC8A1
SLMAP
SMPX
SORBS2
SVIL
SYNE1
SYNM
SYNPO2L
TNNC1
TNNI1
TNNT2
TPM1
TRDN
TRIM55
TRIM63
TTN
UQCRB

## Sheet: Calcium Metagene
ACTN2
AKAP6
ANK2
ANK3
ASPH
CACNA1C
CACNA1E
CACNA1H
CAMK2D
CHRM3
CTNNB1
DMD
ERBB4
FGF12
HOMER1
HSP90AA1
MYLK2
NPTN
PDE1A
PDE1C
PDE4D
PKP2
PLCB1
PLN
RYR2
SLC8A1
TACR1
TRDN

## Sheet: ECM Metagene
Adamts15
Adamts4
Adamts8
Adamtsl2
Adamtsl3
Adamtsl4
Agrn
Agt
Alpl
Astn2
C1qtnf3
Ccn3
Chl1
Cilp2
Clec14a
Cmya5
Cntfr
Cntn1
Coch
Col10a1
Col11a1
Col12a1
Col14a1
Col15a1
Col18a1
Col19a1
Col23a1
Col24a1
Col25a1
Col26a1
Col2a1
Col5a1
Col6a4
Col7a1
Col9a3
Colq
Cpxm2
Crip2
Crispld2
Cthrc1
Dcc
Ddx5
Ecm1
Egflam
Eln
Emid1
Eng
Epha5
Epha7
Fgf10
Fndc1
Foxf1
Frem2
Frem3
Gfap
Gldn
Gpc1
H4c1
H4c18
H4c9
Htra1
Ilk
Itga2
Itga8
Itga9
L1cam
Lama1
Lama2
Lrrn3
Mdga1
Megf6
Mfap2
Mfap4
Mfap5
Mkx
Mmp15
Mmp17
Mmp28
Mybpc1
Mybph
Myom3
Ncam1
Ncan
Ndnf
Ndp
Nfasc
Ntn1
Ntn4
Ntng1
Olfml2a
Optc
Pdgfb
Phospho1
Postn
Prelp
Ptprs
Ptprz1
Reln
Rgcc
Robo2
Rxfp1
Sbspon
Scara5
Scx
Sdk2
Serpinb7
Sfrp1
Shh
Slit2
Sned1
Sorl1
Sost
Sox9
Spock3
Sv2c
Tnn
Tril
Vit
Vwa1
Wnt1
Wnt16
Wnt4
Wnt5b
Wnt7a

## Sheet: EGF Metagene
ADAM33
C1S
COMP
FAT1
FAT4
FBLN1
FBLN2
HEG1
HMCN1
ITGB8
ITGBL1
LAMA4
SLIT3
SVEP1
