# Supplementary material for: Dynamic tissue-specific H2Bub1 is required for human and mouse cardiogenesis
Source: Research Square preprint supplement (doi:10.21203/rs.3.rs-1498907/v1), 2022-04-01
Supplement: Supplementary file 6 [file e0b7fbc38f47754b0bd94b38.xlsx]

## Sheet: WT v UBE2B Null1, WT up 
ext_gene	target_id	pval	qval	b	se_b	mean_obs	var_obs	tech_var	sigma_sq	smooth_sigma_sq	final_sigma_sq
SPTBN1	ENST00000389980.7	4.7714e-31	1.04107e-26	-7.36109	0.635264	3.83694	11.9973	0.39235	-0.107506	0.212991	0.212991
AL512646.1	ENST00000269395.6	1.74383e-30	2.85364e-26	-4.58063	0.399153	5.19915	5.87307	0.0441565	0.194828	0.0624563	0.194828
SH3BGR	ENST00000380634.5	6.44189e-18	4.21667e-14	-1.45394	0.168585	6.3933	0.606744	0.0108023	0.0282182	0.0318289	0.0318289
PDLIM5	ENST00000508216.5	9.21745e-18	5.48497e-14	-1.59087	0.185344	6.51446	0.748027	0.0128858	0.0386429	0.0304948	0.0386429
NEXN	ENST00000342754.5	1.06291e-17	5.79793e-14	-1.2261	0.14312	7.09501	0.484437	0.00447562	0.0261697	0.0262495	0.0262495
CDC42EP3	ENST00000611976.1	7.3724e-17	3.44696e-13	-1.36328	0.163445	8.03829	0.488147	0.00493297	0.0351384	0.0252734	0.0351384
TOP2B	ENST00000264331.8	2.8446e-16	1.03444e-12	-1.95263	0.238715	6.9478	0.7609	0.0584461	-0.0304226	0.0270311	0.0270311
NEXN	ENST00000334785.11	7.54077e-16	2.59787e-12	-1.16381	0.144368	8.27134	0.404897	0.000656063	0.0306069	0.0260813	0.0306069
PDE4DIP	ENST00000618462.4	1.45332e-15	4.75649e-12	-1.10832	0.138872	7.53169	0.298788	0.00396841	0.0243654	0.0249598	0.0249598
MYOCD	ENST00000425538.5	4.60069e-15	1.36885e-11	-1.07665	0.137374	8.60469	0.27864	0.000265708	0.0225074	0.0280415	0.0280415
RHOQ	ENST00000473428.1	1.50705e-14	3.79411e-11	-1.40629	0.182946	6.41645	0.442472	0.00420936	0.0459945	0.0315592	0.0459945
CMYA5	ENST00000446378.3	1.68557e-14	4.08638e-11	-1.79084	0.233408	7.68988	0.752358	0.000648009	0.0810709	0.0248513	0.0810709
PGGT1B	ENST00000419445.6	2.34049e-14	5.47147e-11	-1.2523	0.16412	6.0035	0.345479	0.0027458	0.0113982	0.0376571	0.0376571
GUCY1A1	ENST00000296518.11	2.91364e-14	6.35726e-11	-1.23802	0.162852	7.84865	0.326467	0.0043808	0.0354006	0.02493	0.0354006
SLK	ENST00000335753.8	3.65339e-13	7.24667e-10	-1.02812	0.141461	7.71337	0.23624	0.00516591	0.0132227	0.0248511	0.0248511
JAK2	ENST00000381652.3	7.37413e-13	1.30456e-09	-1.16827	0.162886	6.64349	0.399435	0.00161142	0.0381862	0.0292669	0.0381862
LMOD2	ENST00000458573.3	9.65661e-13	1.6634e-09	-1.5795	0.221364	7.34051	0.613851	0.000790174	0.0727131	0.025342	0.0727131
NEXN	ENST00000440324.5	1.82542e-12	3.06376e-09	-1.25291	0.177789	6.21782	0.533868	0.0132849	0.0192544	0.0341283	0.0341283
CYP2J2	ENST00000371204.4	2.06727e-12	3.38294e-09	-1.30239	0.185265	5.67907	0.466457	0.00647963	0.0348561	0.0450052	0.0450052
MYOM1	ENST00000261606.11	2.26073e-12	3.60928e-09	-1.28737	0.183455	7.7808	0.540619	0.0153591	0.0351243	0.0248733	0.0351243
ITSN2	ENST00000406921.7	2.60312e-12	3.96261e-09	-2.1811	0.311691	6.27041	1.07209	0.0871444	0.0585823	0.0333891	0.0585823
TTN	ENST00000360870.9	3.26528e-12	4.74968e-09	-1.68573	0.242	8.11845	0.724659	0.000510922	0.0873353	0.0255021	0.0873353
MACF1	ENST00000289893.8	5.29351e-12	7.37228e-09	-1.67729	0.243175	8.55372	0.594438	0.00121877	0.0874821	0.0276758	0.0874821
ITGB1	ENST00000423113.5	6.20331e-12	8.45937e-09	-1.26107	0.183431	8.41051	0.455797	0.00301427	0.047456	0.0267785	0.047456
LRRFIP2	ENST00000336686.9	7.85547e-12	1.04938e-08	-1.26393	0.184754	6.01797	0.41388	0.00727706	0.0439239	0.03739	0.0439239
RAPGEF2	ENST00000264431.8	8.8943e-12	1.16439e-08	-1.28492	0.188312	6.76279	0.504529	0.0229803	0.0302116	0.0282856	0.0302116
POPDC2	ENST00000493094.5	1.0044e-11	1.26433e-08	-1.00718	0.147987	8.24899	0.368377	0.000816728	0.0320333	0.0259846	0.0320333
VDAC3	ENST00000521158.5	1.14396e-11	1.38667e-08	-1.5726	0.231704	5.78576	0.562906	0.033517	0.0470129	0.0422736	0.0470129
PTP4A2	ENST00000602725.5	1.42489e-11	1.6363e-08	-1.24436	0.184204	7.29449	0.37544	0.025421	0.00127329	0.0254758	0.0254758
FBXO32	ENST00000517956.5	1.58611e-11	1.79003e-08	-0.877066	0.130132	7.84643	0.197262	0.000474071	0.0134809	0.0249276	0.0249276
ROR1	ENST00000545203.2	2.66191e-11	2.8564e-08	-1.22638	0.184026	7.28452	0.456109	0.0231285	0.0276699	0.0255069	0.0276699
SYNM	ENST00000560674.5	4.4874e-11	4.51895e-08	-1.46772	0.222819	6.18543	0.680813	0.0398662	0.0163615	0.0346065	0.0346065
CNN1	ENST00000586059.5	4.99244e-11	4.87747e-08	-1.29321	0.1968	5.73104	0.427726	0.014464	0.00551999	0.0436315	0.0436315
SYNE1	ENST00000367255.10	5.59308e-11	5.30589e-08	-1.26034	0.192294	6.38548	0.340859	0.00933146	0.0461343	0.0319217	0.0461343
OXCT1	ENST00000196371.10	6.38653e-11	5.88793e-08	-0.851996	0.130386	7.6811	0.211841	0.000648462	0.0199391	0.0248524	0.0248524
RNF115	ENST00000582693.5	7.56975e-11	6.76367e-08	-0.848144	0.130305	7.71314	0.213646	0.000618037	0.017222	0.0248511	0.0248511
GHR	ENST00000357703.6	7.64642e-11	6.76367e-08	-1.62794	0.250167	5.82288	0.680201	0.0218946	0.0719808	0.0414009	0.0719808
DCAF6	ENST00000367840.3	7.9723e-11	6.95791e-08	-1.25215	0.192606	6.51632	0.344386	0.0141638	0.0414818	0.0304758	0.0414818
FILIP1	ENST00000393004.6	9.01627e-11	7.7655e-08	-1.3556	0.209113	8.07825	0.472352	0.000670877	0.0649217	0.0253811	0.0649217
AKAP13	ENST00000558644.2	9.30431e-11	7.90951e-08	-1.7842	0.275431	4.84275	0.705723	0.0310617	0.0463249	0.0827321	0.0827321
IFT81	ENST00000552912.5	1.14021e-10	9.44745e-08	-1.07653	0.166979	6.31266	0.283513	0.00899573	0.0149972	0.0328273	0.0328273
MTRNR2L11	ENST00000604646.1	1.15582e-10	9.45707e-08	-0.850548	0.13197	7.82148	0.257509	0.000391829	0.0257322	0.0249032	0.0257322
TIPARP	ENST00000295924.12	1.19383e-10	9.64747e-08	-0.885857	0.137553	7.30861	0.212853	0.00161034	0.0267709	0.025433	0.0267709
CFL2	ENST00000556161.1	1.21768e-10	9.72017e-08	-1.12064	0.174091	5.96545	0.353267	0.00708041	0.0371914	0.0383812	0.0383812
ANK3	ENST00000280772.7	2.33336e-10	1.80588e-07	-1.18649	0.187213	5.91836	0.329754	0.00534688	0.0472262	0.0393234	0.0472262
RICTOR	ENST00000357387.8	2.87035e-10	2.15959e-07	-0.897937	0.142403	7.03775	0.20225	0.00388612	0.020159	0.0265316	0.0265316
NOTCH2NLC	ENST00000578189.1	3.01602e-10	2.24341e-07	-0.991416	0.157419	6.26728	0.197001	0.00373917	-3.73225e-05	0.0334319	0.0334319
SYNE1	ENST00000367256.9	3.40338e-10	2.47528e-07	-1.20476	0.191865	6.82306	0.291721	0.027376	-0.00304428	0.0278423	0.0278423
GUCY1A2	ENST00000526355.6	3.64118e-10	2.61913e-07	-1.08898	0.173717	6.57767	0.256831	0.00183073	0.0434358	0.0298702	0.0434358
CYCS	ENST00000305786.6	4.09955e-10	2.88542e-07	-0.926835	0.148289	7.76815	0.223618	0.000627037	0.0323575	0.0248666	0.0323575
KRT8	ENST00000549176.1	4.36891e-10	3.01027e-07	-2.65398	0.4253	6.9008	1.71734	0.206494	0.064826	0.0273203	0.064826
RPL21	ENST00000493317.1	4.62449e-10	3.15318e-07	-1.26341	0.202751	6.93211	0.485861	0.0195145	0.0421473	0.0271255	0.0421473
CLGN	ENST00000325617.10	5.27217e-10	3.55774e-07	-0.970564	0.156271	6.79075	0.252509	0.00116933	0.0354616	0.0280757	0.0354616
LNPEP	ENST00000231368.10	6.78225e-10	4.31015e-07	-0.862276	0.139728	7.82155	0.175789	0.000534451	0.0287516	0.0249032	0.0287516
TNNT2	ENST00000438742.6	8.17641e-10	5.09718e-07	-0.952642	0.155116	6.892	0.280213	0.00871505	0.0196469	0.0273766	0.0273766
LMO7	ENST00000489941.6	8.3003e-10	5.12559e-07	-1.34463	0.219029	5.28841	0.467529	0.00993454	0.0620258	0.0584669	0.0620258
FBN2	ENST00000262464.9	9.43069e-10	5.71578e-07	-1.07955	0.176433	9.72088	0.277774	6.02452e-05	0.0466329	0.044177	0.0466329
TCF25	ENST00000561958.5	1.28237e-09	7.42831e-07	-5.71741	0.941977	3.02011	7.81024	0.901007	-0.850151	0.429973	0.429973
MYO18A	ENST00000527372.6	1.36308e-09	7.69167e-07	-0.879576	0.14515	6.90561	0.171972	0.00431292	0.0248452	0.0272898	0.0272898
CPEB4	ENST00000334035.9	1.47224e-09	8.23662e-07	-1.12667	0.186307	6.6151	0.399247	0.0104919	0.0415734	0.0295215	0.0415734
PPP2R5D	ENST00000461010.5	1.63219e-09	9.05411e-07	-6.19786	1.02771	2.9143	8.25341	1.11872	-0.493299	0.465573	0.465573
ANTXR2	ENST00000482406.1	2.13978e-09	1.15247e-06	-1.0219	0.170691	5.91611	0.260785	0.0043337	0.0350203	0.0393696	0.0393696
ANK2	ENST00000506722.5	2.22915e-09	1.17672e-06	-1.4972	0.250362	5.92301	0.523116	0.0547936	0.0362803	0.039228	0.039228
GYG1	ENST00000296048.10	2.32611e-09	1.21808e-06	-0.844187	0.141329	8.06383	0.212019	0.000360929	0.0295997	0.0253408	0.0295997
HACD1	ENST00000361271.8	2.55568e-09	1.31413e-06	-0.863111	0.144869	6.66169	0.233697	0.00237265	0.0275579	0.029108	0.029108
SAMD4A	ENST00000392067.7	2.5376e-09	1.31413e-06	-0.948127	0.159108	7.2715	0.244876	0.0124243	0.0230593	0.0255488	0.0255488
XIRP1	ENST00000396251.1	2.72729e-09	1.37323e-06	-1.49239	0.250939	7.41327	0.537072	0.0101898	0.0842661	0.0251638	0.0842661
RASAL2	ENST00000462775.5	3.00237e-09	1.5002e-06	-0.777181	0.131027	7.49562	0.134998	0.000741306	0.00520075	0.0250107	0.0250107
PPP1R12B	ENST00000608999.6	3.42112e-09	1.68373e-06	-1.6372	0.277022	9.2457	0.808175	0.00161763	0.113494	0.0350952	0.113494
OBSCN	ENST00000284548.15	3.39624e-09	1.68373e-06	-1.10211	0.186445	6.81405	0.268377	0.00583195	0.0463107	0.0279064	0.0463107
ASPH	ENST00000517856.5	3.56696e-09	1.7424e-06	-1.01037	0.171158	6.08	0.254758	0.00241783	0.0415248	0.036295	0.0415248
SLC25A12	ENST00000422440.7	3.72019e-09	1.8038e-06	-0.927664	0.157333	6.38463	0.208502	0.00519878	0.0146582	0.0319318	0.0319318
AAK1	ENST00000409085.9	4.69103e-09	2.20907e-06	-1.13695	0.194093	5.7065	0.320297	0.00879772	0.0477104	0.0442696	0.0477104
NPTN	ENST00000345330.8	4.8063e-09	2.24718e-06	-0.819068	0.139922	7.24756	0.165485	0.00373806	0.015742	0.0256292	0.0256292
MTRNR2L6	ENST00000604952.1	4.90801e-09	2.27847e-06	-1.32617	0.226686	6.40606	0.641269	0.0309481	0.0461318	0.0316793	0.0461318
MYO18B	ENST00000335473.11	5.8153e-09	2.63937e-06	-1.08608	0.186548	7.13611	0.404377	0.0261363	0.0250674	0.0260638	0.0260638
POPDC2	ENST00000474523.5	5.84673e-09	2.63937e-06	-1.3033	0.223893	5.69592	0.517469	0.0306417	0.0430256	0.0445504	0.0445504
PPARGC1A	ENST00000264867.7	6.4893e-09	2.88959e-06	-1.20559	0.207731	6.84322	0.367623	0.00185445	0.0628738	0.0277016	0.0628738
POPDC2	ENST00000341124.9	7.29397e-09	3.16028e-06	-1.04378	0.18046	7.6511	0.358098	0.00487585	0.0439728	0.0248606	0.0439728
GAB1	ENST00000505913.5	7.33859e-09	3.16028e-06	-1.39533	0.241282	6.22838	0.464735	0.0533495	0.0172039	0.0339762	0.0339762
CTNNB1	ENST00000396183.7	7.90052e-09	3.35808e-06	-0.893725	0.154877	7.49803	0.214612	0.0109731	0.0226045	0.025007	0.025007
SLC25A3	ENST00000551917.5	8.58535e-09	3.53441e-06	-1.38177	0.240035	6.89778	0.507801	0.00769606	0.0787293	0.0273395	0.0787293
CAPZA2	ENST00000361183.8	8.45741e-09	3.53441e-06	-0.799379	0.138803	6.88473	0.147158	0.00147585	0.011985	0.0274237	0.0274237
KRBA2	ENST00000643221.1	8.73129e-09	3.57203e-06	-1.50097	0.26087	5.2889	0.562699	0.0436339	0.0351384	0.058446	0.058446
FGF5	ENST00000312465.11	9.01284e-09	3.66431e-06	-1.50583	0.261959	4.94058	0.676	0.0265346	0.0619837	0.0763995	0.0763995
JAZF1	ENST00000283928.10	9.18902e-09	3.71288e-06	-0.854206	0.148685	6.53285	0.171689	0.00285273	0.0188636	0.0303083	0.0303083
KTN1	ENST00000395309.7	9.31035e-09	3.73882e-06	-1.40699	0.244998	7.19486	0.504045	0.0591122	0.0309241	0.0258223	0.0309241
SORBS2	ENST00000490779.5	9.83033e-09	3.87629e-06	-1.36188	0.237524	5.60653	0.558167	0.00683826	0.0777884	0.0470689	0.0777884
MT-ND3	ENST00000361227.2	1.07524e-08	4.18252e-06	-1.05264	0.18408	9.97029	0.443235	4.6891e-05	0.037977	0.0507812	0.0507812
AKAP6	ENST00000280979.9	1.08589e-08	4.18252e-06	-1.3043	0.228155	7.48322	0.524257	0.000842592	0.0772397	0.0250305	0.0772397
MLIP	ENST00000274897.9	1.0954e-08	4.19307e-06	-1.24909	0.218554	6.19962	0.47306	0.00526677	0.066382	0.0343948	0.066382
FBXL17	ENST00000619412.4	1.39206e-08	5.2368e-06	-1.08831	0.191795	6.04907	0.268902	0.0183466	0.0234119	0.0368311	0.0368311
PHF20L1	ENST00000395390.6	1.48005e-08	5.50451e-06	-0.967367	0.170796	6.43397	0.236699	0.0123972	0.0156571	0.03136	0.03136
KLHL13	ENST00000469946.5	1.47467e-08	5.50451e-06	-0.982671	0.173479	5.99609	0.330983	0.00734703	0.0206224	0.0377956	0.0377956
PCDH7	ENST00000511884.6	1.56938e-08	5.8038e-06	-1.07594	0.190303	7.98735	0.266133	0.000541241	0.0537818	0.0251541	0.0537818
NARS1	ENST00000587194.1	1.82081e-08	6.58479e-06	-6.27831	1.11551	2.30594	8.83475	0.964379	0.902148	0.707454	0.902148
TRAC	ENST00000611116.2	1.88094e-08	6.72791e-06	-4.38276	0.779488	3.53463	4.57343	0.0941182	0.817284	0.283395	0.817284
PTPN21	ENST00000328736.7	1.99496e-08	6.94598e-06	-0.87958	0.15672	7.39239	0.264004	0.0116308	0.000362003	0.0252108	0.0252108
SYNM	ENST00000336292.10	2.30641e-08	7.90421e-06	-1.01747	0.182105	6.91421	0.25192	0.00380352	0.0459398	0.0272358	0.0459398
CFL2	ENST00000341223.7	2.37417e-08	8.09406e-06	-0.924885	0.165683	7.13174	0.253222	0.00181648	0.0393598	0.0260829	0.0393598
SORBS2	ENST00000421420.5	2.53758e-08	8.47463e-06	-1.30295	0.233894	5.24776	0.493568	0.012969	0.0690909	0.0602358	0.0690909
DUSP27	ENST00000361200.6	2.6243e-08	8.71974e-06	-1.07896	0.193889	7.46766	0.326061	0.00142918	0.0549603	0.0250569	0.0549603
PROS1	ENST00000648381.1	2.65046e-08	8.76219e-06	-1.19514	0.214835	7.05078	0.461654	0.0344992	0.0347318	0.026465	0.0347318
KAT2B	ENST00000263754.5	2.7919e-08	9.1834e-06	-0.946976	0.170503	6.15816	0.222455	0.00217816	0.0414288	0.0350235	0.0414288
ATP5F1C	ENST00000335698.4	3.30065e-08	1.07488e-05	-0.931681	0.16864	7.78126	0.2054	0.00224438	0.0404146	0.0248736	0.0404146
NACA	ENST00000550952.5	3.40733e-08	1.10413e-05	-6.34373	1.14941	3.27285	8.41857	1.6292	-1.02882	0.352521	0.352521
PPP1R12B	ENST00000491336.5	3.68933e-08	1.18379e-05	-2.28544	0.415149	6.85674	1.36568	0.00386159	0.254662	0.0276094	0.254662
TBL1XR1	ENST00000631253.2	3.88258e-08	1.2337e-05	-1.13263	0.206078	6.23323	0.299306	0.0297952	0.0094356	0.033907	0.033907
LCK	ENST00000336890.10	3.96823e-08	1.25482e-05	-5.31046	0.966898	2.14893	6.85241	0.294408	1.10793	0.781843	1.10793
MEF2C	ENST00000637481.1	3.99753e-08	1.25801e-05	-1.19391	0.217432	6.5084	0.395535	0.0214275	0.0494874	0.0305572	0.0494874
FILIP1	ENST00000237172.12	4.25091e-08	1.31873e-05	-0.917708	0.167462	7.87468	0.199706	0.00100054	0.0410647	0.0249609	0.0410647
NDUFA5	ENST00000378795.8	4.64263e-08	1.42673e-05	-0.856481	0.156736	6.41249	0.177593	0.00524445	0.0113862	0.0316048	0.0316048
IDH3A	ENST00000558535.1	5.03343e-08	1.51831e-05	-0.911687	0.167278	6.99118	0.232547	0.00176745	0.0402055	0.0267815	0.0402055
FGF5	ENST00000456523.3	5.30482e-08	1.57121e-05	-1.47056	0.270284	4.76905	0.488193	0.0216418	-0.0107969	0.0879384	0.0879384
TAB2	ENST00000538427.5	5.29175e-08	1.57121e-05	-0.767642	0.141079	8.13298	0.128635	0.00430593	0.00819811	0.025549	0.025549
AC245297.1	ENST00000313342.8	5.73669e-08	1.67637e-05	-1.17515	0.216544	5.95856	0.341814	0.00399204	0.0663451	0.0385158	0.0663451
TTN	ENST00000589042.5	5.73184e-08	1.67637e-05	-2.07294	0.381971	7.0061	1.06306	0.0206591	0.198193	0.0266994	0.198193
GOLGA4	ENST00000437131.1	5.77276e-08	1.67941e-05	-1.31313	0.242021	7.01802	0.437669	0.0459876	0.0418735	0.0266353	0.0418735
POPDC3	ENST00000254765.4	5.96551e-08	1.70517e-05	-1.21696	0.224538	5.91691	0.481603	0.00496481	0.070661	0.0393532	0.070661
UGP2	ENST00000613823.1	6.12188e-08	1.73472e-05	-0.743727	0.137341	8.25139	0.169394	0.00229887	0.0189093	0.0259948	0.0259948
SORBS2	ENST00000448662.6	6.17276e-08	1.7416e-05	-0.785786	0.145147	8.63504	0.224848	0.00105347	0.0305481	0.0282714	0.0305481
FASTKD1	ENST00000453153.7	6.78675e-08	1.85246e-05	-1.06037	0.196485	5.64346	0.274888	0.0119131	0.0439091	0.0459961	0.0459961
YARS1	ENST00000616261.1	7.0025e-08	1.90192e-05	-0.812703	0.150749	6.6821	0.146795	0.00515395	0.0162268	0.0289339	0.0289339
PLN	ENST00000357525.6	7.14134e-08	1.92737e-05	-1.38418	0.256921	10.04	0.552823	4.62316e-05	0.0989662	0.0529063	0.0989662
CEP350	ENST00000367607.8	7.92349e-08	2.10832e-05	-0.757419	0.141076	7.46648	0.13165	0.000862572	0.0289912	0.025059	0.0289912
MED21	ENST00000282892.4	8.47513e-08	2.24598e-05	-0.852626	0.15917	6.29545	0.16597	0.00494972	0.0303741	0.0330528	0.0330528
NCL	ENST00000494618.1	9.46454e-08	2.45841e-05	-0.798441	0.149613	6.80542	0.18059	0.00560746	0.0126782	0.0279685	0.0279685
ANTXR2	ENST00000404191.5	9.66186e-08	2.48014e-05	-0.9232	0.173112	6.11334	0.178628	0.00921303	0.014105	0.0357385	0.0357385
DMD	ENST00000357033.8	9.6443e-08	2.48014e-05	-1.68616	0.316157	7.97913	0.685196	0.0022926	0.147641	0.0251367	0.147641
REST	ENST00000619101.4	1.00512e-07	2.57001e-05	-1.07692	0.202209	7.33657	0.271216	0.0359799	0.0155226	0.0253528	0.0253528
SLC16A1	ENST00000630362.2	1.06013e-07	2.66895e-05	-0.797976	0.150105	7.90003	0.186845	0.000217888	0.0335796	0.024996	0.0335796
SLC16A1	ENST00000369626.7	1.06013e-07	2.66895e-05	-0.797976	0.150105	7.90003	0.186845	0.000217888	0.0335796	0.024996	0.0335796
CLTC	ENST00000472651.5	1.06913e-07	2.68129e-05	-0.967816	0.182106	5.78248	0.274408	0.00739148	0.0245067	0.0423526	0.0423526
YBX1	ENST00000467957.1	1.35206e-07	3.33969e-05	-0.706613	0.13404	7.42643	0.13322	0.00181433	0.0172193	0.0251359	0.0251359
AGL	ENST00000370163.7	1.40373e-07	3.45428e-05	-1.33335	0.25326	6.88539	0.555451	0.0543072	0.0419039	0.0274194	0.0419039
AASS	ENST00000417368.7	1.48298e-07	3.59524e-05	-0.855486	0.162805	6.80105	0.20227	0.0022538	0.0375045	0.0280002	0.0375045
SLMAP	ENST00000494088.5	1.54388e-07	3.71536e-05	-1.25973	0.240075	5.51595	0.410167	0.0365475	0.0109642	0.0499066	0.0499066
OPHN1	ENST00000355520.6	1.57878e-07	3.7716e-05	-0.707678	0.134973	7.07835	0.15356	0.000997632	0.013277	0.0263288	0.0263288
SUGT1	ENST00000310528.8	1.59007e-07	3.78476e-05	-0.768798	0.146666	6.50871	0.122068	0.00171251	0.012699	0.030554	0.030554
AKAP6	ENST00000557272.1	1.68502e-07	3.93147e-05	-1.29967	0.248451	6.13996	0.429321	0.00792151	0.0846701	0.0353094	0.0846701
ZBTB37	ENST00000367701.9	1.6997e-07	3.9453e-05	-0.735024	0.140553	6.73975	0.121859	0.00116867	0.0214204	0.0284642	0.0284642
NCOA4	ENST00000585132.5	1.83291e-07	4.20972e-05	-0.874837	0.167737	7.16533	0.218639	0.0162634	0.0141169	0.0259402	0.0259402
HLTF	ENST00000392912.6	1.91749e-07	4.38857e-05	-1.0973	0.210728	5.93363	0.245224	0.0275975	-0.00340829	0.0390122	0.0390122
CRYBG3	ENST00000389622.7	2.26924e-07	5.0869e-05	-1.08894	0.210389	7.15014	0.290436	0.000999348	0.0653961	0.0260036	0.0653961
ATP13A3	ENST00000645319.1	2.31259e-07	5.1664e-05	-0.741961	0.14345	8.62833	0.158454	0.00264692	0.0263072	0.0282198	0.0282198
LDB3	ENST00000361373.8	2.33079e-07	5.18934e-05	-1.05199	0.203447	9.71867	0.343999	0.000190067	0.0618961	0.0441248	0.0618961
ANK3	ENST00000373827.6	2.39629e-07	5.31709e-05	-0.984669	0.190619	7.27503	0.226414	0.00385521	0.0506483	0.0255373	0.0506483
RSL1D1	ENST00000355674.9	2.44355e-07	5.37242e-05	-0.975247	0.188929	6.18008	0.303883	0.0173618	0.0361794	0.0346874	0.0361794
NDUFS1	ENST00000233190.11	2.45406e-07	5.37242e-05	-0.738539	0.143095	6.594	0.130923	0.000998144	0.0277235	0.0297162	0.0297162
NDUFS1	ENST00000635748.2	2.45406e-07	5.37242e-05	-0.738539	0.143095	6.594	0.130923	0.000998144	0.0277235	0.0297162	0.0297162
HOMER1	ENST00000334082.10	2.5765e-07	5.62167e-05	-0.70598	0.137029	6.96935	0.125012	0.00126022	0.0155759	0.0269051	0.0269051
MTRNR2L1	ENST00000540040.2	2.67488e-07	5.79767e-05	-0.809526	0.157342	9.36734	0.227563	8.65553e-05	0.0191437	0.037048	0.037048
CSDE1	ENST00000369530.5	2.67163e-07	5.79767e-05	-1.04687	0.203463	8.40789	0.279196	0.00195381	0.0601421	0.0267638	0.0601421
KLC1	ENST00000445352.8	2.69559e-07	5.82328e-05	-6.91826	1.34503	2.70991	11.0165	1.09208	1.62158	0.539567	1.62158
ATAD1	ENST00000328142.3	2.77218e-07	5.91069e-05	-0.698566	0.135952	6.98542	0.111166	0.000910877	0.00179561	0.0268137	0.0268137
CLIC5	ENST00000185206.12	2.76837e-07	5.91069e-05	-1.59006	0.309436	5.44067	0.649417	0.0328953	0.110731	0.0525006	0.110731
PHF10	ENST00000612128.1	2.76269e-07	5.91069e-05	-0.68054	0.132428	7.34813	0.115574	0.000984231	0.0196431	0.0253214	0.0253214
ATAD1	ENST00000634773.1	2.77218e-07	5.91069e-05	-0.698566	0.135952	6.98542	0.111166	0.000910877	0.00179561	0.0268137	0.0268137
SLC25A12	ENST00000263812.8	2.81755e-07	5.98793e-05	-0.764607	0.148893	6.79931	0.168395	0.0024678	0.0307861	0.0280129	0.0307861
POPDC3	ENST00000474760.1	2.97617e-07	6.26402e-05	-1.05292	0.20545	5.53858	0.317112	0.0141452	0.0368808	0.0491692	0.0491692
RGPD6	ENST00000329516.7	3.07967e-07	6.44912e-05	-0.826315	0.161437	8.04166	0.193807	0.0104984	0.0285943	0.025282	0.0285943
BVES	ENST00000314641.10	3.0871e-07	6.44912e-05	-1.00043	0.195471	8.8274	0.37866	0.000235357	0.0570779	0.0299476	0.0570779
USP53	ENST00000509769.5	3.2259e-07	6.70341e-05	-0.816502	0.159793	6.52352	0.155528	0.00789831	0.00626099	0.0304024	0.0304024
PCGF5	ENST00000336126.6	3.26675e-07	6.76683e-05	-1.08384	0.212211	6.34851	0.360888	0.0351782	-0.0144319	0.0323719	0.0323719
SC5D	ENST00000392789.2	3.44098e-07	7.08291e-05	-0.760254	0.149141	6.83056	0.150355	0.00166017	0.0317046	0.0277895	0.0317046
PAIP1	ENST00000436644.6	3.47319e-07	7.08611e-05	-0.674229	0.132311	7.80922	0.118723	0.00136658	0.00643309	0.0248929	0.0248929
CHIC1	ENST00000373504.10	3.57792e-07	7.25078e-05	-0.815283	0.160169	6.11484	0.158196	0.00276726	0.0199185	0.0357139	0.0357139
CAP2	ENST00000229922.7	3.67243e-07	7.41932e-05	-1.08736	0.213829	7.73254	0.302144	0.00148778	0.0670965	0.0248539	0.0670965
USP15	ENST00000280377.10	3.93529e-07	7.92591e-05	-0.788064	0.155374	6.57661	0.129621	0.00633109	0.00400323	0.0298803	0.0298803
CLIP1	ENST00000620786.4	3.98646e-07	7.97987e-05	-0.866622	0.170945	6.89274	0.169777	0.0164613	0.0220013	0.0273719	0.0273719
PPARGC1B	ENST00000309241.10	3.99945e-07	7.98147e-05	-1.05351	0.207834	5.27129	0.250376	0.00559056	0.0450871	0.0592022	0.0592022
ANTXR2	ENST00000403729.7	4.06703e-07	8.04277e-05	-0.752766	0.148598	7.39169	0.13659	0.00107542	0.0320466	0.0252124	0.0320466
SVIL	ENST00000632315.1	4.51323e-07	8.76624e-05	-0.685867	0.135925	7.42907	0.145834	0.00258288	0.0159492	0.0251304	0.0251304
MXRA7	ENST00000375036.6	4.76678e-07	9.17704e-05	-0.805893	0.160043	7.61194	0.183277	0.0042234	0.0341974	0.0248814	0.0341974
CD69	ENST00000228434.7	4.78322e-07	9.18168e-05	-4.68965	0.931446	3.06701	7.29514	0.237146	1.06424	0.414792	1.06424
LDB3	ENST00000429277.6	5.36662e-07	0.000100943	-1.10895	0.221226	8.36912	0.407504	0.00230506	0.0711066	0.0265536	0.0711066
HECTD1	ENST00000556224.5	5.67345e-07	0.000105203	-5.11867	1.02332	3.61949	6.70407	1.05959	0.511193	0.262684	0.511193
DGKH	ENST00000261491.9	5.79061e-07	0.000107072	-0.727459	0.145548	6.54763	0.129106	0.0016149	0.0273671	0.0301614	0.0301614
PIGN	ENST00000638183.1	5.93198e-07	0.000109377	-0.663823	0.13294	7.2311	0.0964216	0.000822255	0.0124044	0.0256871	0.0256871
DENND5B	ENST00000389082.10	6.1389e-07	0.000111931	-1.12105	0.224803	8.77088	0.329829	0.000237359	0.0755675	0.0294144	0.0755675
PAM	ENST00000304400.11	6.10624e-07	0.000111931	-0.790394	0.158465	8.99448	0.165512	0.00103497	0.0366316	0.0317372	0.0366316
LMO7	ENST00000526202.5	6.23861e-07	0.000112807	-0.657374	0.131905	7.93491	0.119031	0.00104632	0.0237696	0.0250522	0.0250522
TMEM245	ENST00000374586.8	6.22811e-07	0.000112807	-0.684153	0.13727	8.59915	0.107636	0.000263908	0.016333	0.0280005	0.0280005
TTN	ENST00000342992.10	6.35452e-07	0.000114505	-2.6811	0.538361	9.67171	1.84018	0.000726652	0.434022	0.043041	0.434022
CAMK2D	ENST00000394524.7	6.41214e-07	0.000114992	-0.665279	0.133634	7.63987	0.134933	0.00192156	0.024476	0.0248654	0.0248654
AKAP6	ENST00000556638.1	6.43342e-07	0.000115058	-1.38184	0.277605	4.60726	0.538612	0.0147801	0.0414707	0.100817	0.100817
MAP4	ENST00000426837.6	6.71963e-07	0.0001192	-1.61947	0.325895	7.21936	0.686921	0.00306588	0.156245	0.0257298	0.156245
EXOC1	ENST00000349598.6	6.97498e-07	0.000123062	-0.97413	0.196316	6.01189	0.221933	0.0203081	0.0373113	0.0375017	0.0375017
CAPZA2	ENST00000426421.5	7.09607e-07	0.000124862	-0.652825	0.131652	7.52986	0.0988412	0.0010362	0.00456075	0.0249621	0.0249621
PTPRD	ENST00000397606.7	7.3143e-07	0.000126978	-1.16334	0.234884	6.09751	0.319781	0.00995135	0.0728044	0.0359999	0.0728044
PTPRD	ENST00000635279.1	7.3143e-07	0.000126978	-1.16334	0.234884	6.09751	0.319781	0.00995135	0.0728044	0.0359999	0.0728044
COX7B	ENST00000475465.1	7.33269e-07	0.000126978	-1.03879	0.209758	5.6478	0.298784	0.00925269	0.0567449	0.0458731	0.0567449
ASH1L	ENST00000392403.8	7.48485e-07	0.000128256	-0.664566	0.134301	8.06506	0.101742	0.00171089	0.0234988	0.0253442	0.0253442
CAST	ENST00000421689.6	7.65103e-07	0.000130761	-4.96958	1.00516	2.27107	5.30457	0.792026	-0.583001	0.723494	0.723494
SOD2	ENST00000546260.5	7.71732e-07	0.000131208	-0.781396	0.158101	7.91474	0.170609	0.000526082	0.0369678	0.0250186	0.0369678
QKI	ENST00000361752.8	7.71579e-07	0.000131208	-1.08828	0.220191	7.662	0.307242	0.00132633	0.0714	0.0248569	0.0714
PAM	ENST00000379799.7	7.79751e-07	0.000132228	-1.01266	0.204976	8.02754	0.315997	0.00209855	0.0609241	0.0252465	0.0609241
DAAM1	ENST00000395125.1	8.51873e-07	0.000141886	-0.695915	0.141357	7.76196	0.129889	0.00102492	0.0289479	0.0248637	0.0289479
SKA2	ENST00000330137.12	8.5121e-07	0.000141886	-0.727591	0.147787	6.47349	0.15375	0.0018364	0.0295349	0.0309251	0.0309251
MOB4	ENST00000323303.9	8.48504e-07	0.000141886	-0.656488	0.133328	7.22087	0.110043	0.000940189	0.00533551	0.0257242	0.0257242
FAM241A	ENST00000309733.6	8.56477e-07	0.00014229	-1.03723	0.210732	6.6302	0.32659	0.00190557	0.0647063	0.029385	0.0647063
MEF2A	ENST00000557942.5	8.7464e-07	0.00014421	-1.20844	0.245721	8.3773	0.422666	0.00247091	0.0880973	0.0265969	0.0880973
DLD	ENST00000205402.10	8.82853e-07	0.000144834	-0.868781	0.176722	5.90588	0.166721	0.00726387	0.0230598	0.0395819	0.0395819
JMJD1C	ENST00000639129.1	9.00104e-07	0.000147295	-0.831227	0.169213	7.50565	0.179193	0.00853651	0.0344131	0.0249956	0.0344131
ITSN2	ENST00000416160.1	9.22803e-07	0.000150258	-1.19756	0.244031	6.41654	0.417928	0.00179542	0.0875314	0.0315581	0.0875314
KRR1	ENST00000229214.9	9.45629e-07	0.000152515	-0.679263	0.138551	6.86373	0.1009	0.00123219	0.00708298	0.0275623	0.0275623
PRKAG2	ENST00000418337.6	9.45984e-07	0.000152515	-0.893574	0.182267	6.85182	0.294355	0.00721425	0.0426176	0.0276427	0.0426176
EEA1	ENST00000322349.12	9.49111e-07	0.000152644	-0.660303	0.134703	7.11513	0.122779	0.00106064	0.0186971	0.0261569	0.0261569
USP25	ENST00000400183.6	9.74819e-07	0.000156394	-4.53312	0.925759	3.34727	5.80134	0.577948	0.707596	0.331747	0.707596
LAMA2	ENST00000421865.2	1.00463e-06	0.000160782	-1.4461	0.295681	7.99921	0.585695	0.00276186	0.128379	0.0251801	0.128379
RAB9B	ENST00000243298.3	1.02888e-06	0.000164262	-0.984348	0.201462	5.87517	0.29979	0.00287435	0.0580058	0.0402342	0.0580058
SLC25A30	ENST00000519676.6	1.06665e-06	0.000169878	-0.88227	0.180833	5.87235	0.181716	0.00875529	0.0150604	0.0402955	0.0402955
VWA8	ENST00000379310.8	1.07743e-06	0.000171178	-0.657181	0.134753	7.21465	0.122153	0.000846278	0.0263911	0.0257472	0.0263911
KLHL24	ENST00000242810.11	1.08915e-06	0.000171377	-0.811765	0.166523	7.59141	0.161285	0.00777662	0.033818	0.0248969	0.033818
STRIP2	ENST00000435494.2	1.0964e-06	0.000172103	-1.13449	0.232788	5.34509	0.466308	0.0251578	0.0319695	0.0561278	0.0561278
MYL4	ENST00000573747.6	1.17068e-06	0.00018245	-1.22034	0.25107	6.31233	0.434498	0.0163512	0.0782034	0.0328316	0.0782034
CCL5	ENST00000605140.6	1.17739e-06	0.00018306	-3.29636	0.678347	3.45749	3.33154	0.387576	-0.00557253	0.302656	0.302656
PEAK1	ENST00000312493.5	1.26656e-06	0.000194613	-0.636821	0.131441	8.14035	0.0951985	0.000341534	0.0228235	0.0255734	0.0255734
CENPBD1P1	ENST00000651608.1	1.27555e-06	0.000195078	-0.642538	0.132659	7.27419	0.10025	0.000857659	0.0152994	0.02554	0.02554
ZNF91	ENST00000397082.2	1.2821e-06	0.000195454	-1.53325	0.316622	5.45764	0.469042	0.0984783	-0.0610338	0.0518963	0.0518963
RBM20	ENST00000369519.4	1.31362e-06	0.000199502	-1.24074	0.256474	8.24153	0.473815	0.000289637	0.0983788	0.0259533	0.0983788
DYRK2	ENST00000344096.3	1.3301e-06	0.000200148	-0.633714	0.131063	7.49039	0.0853527	0.000747202	0.0106421	0.0250189	0.0250189
TACC2	ENST00000369004.7	1.33675e-06	0.000200688	-1.29461	0.267802	5.489	0.444699	0.0493846	0.0581922	0.0508098	0.0581922
TNNT2	ENST00000412633.3	1.35445e-06	0.00020288	-0.976898	0.20219	9.19048	0.368309	0.00112446	0.0601965	0.0342824	0.0601965
ZBTB43	ENST00000373464.5	1.36951e-06	0.000204201	-0.808071	0.167324	6.77669	0.166833	0.0138155	0.0265513	0.0281803	0.0281803
CCDC141	ENST00000443758.6	1.37679e-06	0.000204758	-1.22339	0.253376	6.32444	0.374068	0.00419824	0.092101	0.0326756	0.092101
MATR3	ENST00000510056.5	1.38205e-06	0.000204758	-0.670346	0.138858	8.47109	0.111436	0.00178706	0.0190195	0.0271351	0.0271351
AKAP13	ENST00000394518.6	1.40028e-06	0.000205342	-1.09122	0.226162	8.43539	0.29552	0.000986371	0.0757374	0.026921	0.0757374
TRIM55	ENST00000353317.9	1.39728e-06	0.000205342	-1.00235	0.207724	7.55294	0.365505	0.00301604	0.061708	0.0249344	0.061708
LMO7	ENST00000321797.12	1.42843e-06	0.000208707	-1.73299	0.359467	6.06728	0.648199	0.157312	-0.143665	0.0365131	0.0365131
TIMM44	ENST00000597926.1	1.43885e-06	0.000209761	-5.26536	1.0925	2.68752	5.73635	1.24224	-0.960685	0.548091	0.548091
SLC16A7	ENST00000547379.6	1.57181e-06	0.000227624	-1.16931	0.243511	6.17336	0.349063	0.0284775	0.0604691	0.0347896	0.0604691
WEE1	ENST00000299613.10	1.59074e-06	0.000229351	-1.84253	0.383903	5.14282	0.90343	0.0704082	0.150664	0.065178	0.150664
SCHIP1	ENST00000482804.1	1.58745e-06	0.000229351	-0.940311	0.195902	6.53968	0.330172	0.00601403	0.0515524	0.0302401	0.0515524
TXLNB	ENST00000358430.8	1.59547e-06	0.000229527	-1.49642	0.311826	5.95758	0.606736	0.00295148	0.142902	0.038535	0.142902
RMDN1	ENST00000406452.8	1.60697e-06	0.000230674	-0.657072	0.136963	7.00043	0.10911	0.00140774	0.0206222	0.0267304	0.0267304
ARFGAP1	ENST00000549047.5	1.66671e-06	0.000238204	-4.86877	1.01642	2.3852	5.53155	0.877664	-0.672549	0.671988	0.671988
COX5A	ENST00000568517.1	1.78891e-06	0.000251281	-0.744465	0.155879	7.64144	0.183518	0.000742328	0.0357051	0.0248647	0.0357051
NAV1	ENST00000367295.5	1.79942e-06	0.000252216	-1.19273	0.249799	9.39346	0.53527	0.000283178	0.0933163	0.0374979	0.0933163
UNC45B	ENST00000394570.6	1.95777e-06	0.000271504	-0.984066	0.206835	8.51453	0.344542	0.000897527	0.0632736	0.0274114	0.0632736
PPARA	ENST00000624793.1	1.96765e-06	0.000272297	-0.786231	0.165288	5.98243	0.166478	0.00292625	0.0362046	0.0380541	0.0380541
LRRFIP1	ENST00000308482.14	2.00404e-06	0.000275585	-0.707645	0.148883	7.77915	0.150271	0.000553516	0.0326959	0.0248724	0.0326959
CD52	ENST00000374213.3	2.03711e-06	0.000279545	-4.71365	0.992408	2.67086	8.2248	0.100702	1.37661	0.554485	1.37661
UQCRB	ENST00000517603.5	2.08043e-06	0.000284893	-0.666021	0.140349	7.09297	0.13617	0.0011035	0.0284434	0.0262591	0.0284434
SYDE2	ENST00000234668.6	2.09628e-06	0.000286464	-1.06302	0.224081	5.16155	0.250626	0.0110637	0.0369612	0.0642548	0.0642548
ZMYND8	ENST00000352431.6	2.16573e-06	0.000294724	-5.20378	1.09847	3.72462	7.01953	1.57203	-0.431363	0.237917	0.237917
SLC8A1	ENST00000332839.8	2.20861e-06	0.000299936	-1.37443	0.290373	7.73222	0.476187	0.0186526	0.107822	0.0248539	0.107822
MTRNR2L4	ENST00000399974.4	2.22463e-06	0.000301486	-0.616735	0.130336	7.52872	0.141251	0.000517747	0.0119083	0.0249636	0.0249636
ITK	ENST00000519402.5	2.25096e-06	0.000303796	-1.98353	0.419398	3.7559	0.912056	0.0330446	0.0962766	0.230797	0.230797
IL2RG	ENST00000374202.6	2.2745e-06	0.000306342	-4.67033	0.987935	2.2287	9.98983	0.286463	1.17756	0.743352	1.17756
SBDS	ENST00000246868.7	2.30125e-06	0.000309308	-0.616957	0.130573	7.75103	0.110585	0.000714734	0.0235285	0.0248593	0.0248593
SVIL	ENST00000355867.8	2.3764e-06	0.000318102	-0.830973	0.176111	8.89469	0.171297	0.000693395	0.0458293	0.030629	0.0458293
BNIP2	ENST00000439052.5	2.37379e-06	0.000318102	-1.30746	0.277081	4.73294	0.406376	0.0245261	0.0449589	0.0906347	0.0906347
REEP5	ENST00000379638.9	2.41728e-06	0.000322914	-0.715737	0.151801	7.80091	0.14274	0.000708633	0.0338565	0.0248865	0.0338565
AP1B1	ENST00000357586.6	2.43013e-06	0.000323339	-7.84893	1.66506	3.34316	14.673	1.558	2.60062	0.332872	2.60062
PNRC1	ENST00000369472.1	2.43034e-06	0.000323339	-0.895498	0.18997	5.72858	0.196337	0.0104381	0.0384957	0.0436949	0.0436949
MICAL2	ENST00000256194.8	2.44077e-06	0.000324067	-0.92445	0.196148	7.08881	0.27309	0.00341294	0.0542982	0.0262787	0.0542982
CUL2	ENST00000421317.4	2.47905e-06	0.000328484	-0.705046	0.149696	6.58528	0.113072	0.00381535	0.00980197	0.0297981	0.0297981
LTBP1	ENST00000418533.6	2.49571e-06	0.000330024	-1.77363	0.376687	7.29408	0.813945	0.0394197	0.17342	0.025477	0.17342
XPNPEP3	ENST00000357137.9	2.51406e-06	0.000331238	-0.659539	0.140119	6.80448	0.108962	0.00147481	0.0132355	0.0279753	0.0279753
ZNF460	ENST00000360338.4	2.52864e-06	0.000332363	-1.29306	0.274779	4.9415	0.417197	0.0153979	0.0978577	0.0763429	0.0978577
TMTC1	ENST00000551659.5	2.58856e-06	0.000339558	-1.48024	0.314877	4.83172	0.588835	0.0609402	0.0877809	0.0834867	0.0877809
FERMT2	ENST00000554152.5	2.63051e-06	0.000344089	-1.2434	0.26468	7.21473	0.543131	0.00568716	0.0993964	0.0257469	0.0993964
BTBD1	ENST00000261721.8	2.69303e-06	0.000350453	-0.615199	0.13109	8.04934	0.0887963	0.000475017	0.00641766	0.0253019	0.0253019
B4GALNT3	ENST00000322843.3	2.78428e-06	0.000360892	-1.38374	0.295285	5.16244	0.46656	0.0194463	0.111344	0.0642116	0.111344
MT-ATP8	ENST00000361851.1	2.89274e-06	0.000371755	-0.967458	0.206797	9.26104	0.402277	9.6905e-05	0.0640507	0.0353289	0.0640507
RYR2	ENST00000366574.7	2.89648e-06	0.000371755	-1.80853	0.386601	8.63859	0.863399	0.000362634	0.223828	0.0282988	0.223828
DENND5A	ENST00000530044.5	3.04378e-06	0.000384627	-0.718984	0.154029	7.38804	0.116483	0.0103665	0.0153895	0.025221	0.025221
ABCC9	ENST00000261200.8	3.02696e-06	0.000384627	-0.861121	0.184434	5.74334	0.177319	0.00408128	0.0469428	0.0433188	0.0469428
HSPH1	ENST00000630972.2	3.03522e-06	0.000384627	-0.755498	0.161832	6.92157	0.181804	0.00724071	0.0320435	0.0271901	0.0320435
RHEB	ENST00000472642.5	3.03915e-06	0.000384627	-0.707067	0.151466	6.57407	0.14616	0.00450835	0.0237017	0.0299045	0.0299045
GPR22	ENST00000304402.6	3.11279e-06	0.000391083	-2.52829	0.542176	3.15686	1.96964	0.0432449	0.397687	0.386737	0.397687
GPR22	ENST00000639742.2	3.11279e-06	0.000391083	-2.52829	0.542176	3.15686	1.96964	0.0432449	0.397687	0.386737	0.397687
SLIT2	ENST00000503837.5	3.29326e-06	0.000411387	-0.917423	0.197226	6.9539	0.20317	0.00832724	0.05002	0.026995	0.05002
PCGF5	ENST00000490164.1	3.42663e-06	0.000425611	-0.88243	0.190038	5.67231	0.340138	0.00402122	0.0501505	0.0451901	0.0501505
BLOC1S6	ENST00000566753.5	3.43564e-06	0.000425922	-0.661154	0.142401	6.73147	0.110346	0.0018875	0.0265743	0.0285297	0.0285297
ZADH2	ENST00000322342.4	3.44298e-06	0.000426025	-0.711197	0.153194	6.35979	0.130485	0.00297032	0.0240998	0.0322324	0.0322324
STK39	ENST00000355999.5	3.45761e-06	0.000427028	-0.890321	0.191814	7.98781	0.288368	0.000320905	0.0548682	0.0251551	0.0548682
ALPK2	ENST00000361673.4	3.61161e-06	0.000443624	-0.940083	0.202929	9.36976	0.266331	0.000132247	0.0616382	0.0370891	0.0616382
PDE4D	ENST00000405755.6	3.61232e-06	0.000443624	-1.10357	0.238222	5.21443	0.311552	0.0184158	0.0667089	0.0617454	0.0667089
TNRC6B	ENST00000335727.13	3.64748e-06	0.000447103	-0.668791	0.144431	7.66791	0.104791	0.00643532	0.018685	0.0248552	0.0248552
H4C3	ENST00000377803.3	3.73955e-06	0.000455828	-3.20636	0.693215	2.61364	2.70757	0.144002	0.159777	0.576818	0.576818
PTPN21	ENST00000557249.1	3.84448e-06	0.000464474	-4.66624	1.01009	1.6762	5.23337	0.384296	1.14614	1.03849	1.14614
PAM	ENST00000348126.6	3.84052e-06	0.000464474	-0.641172	0.138787	8.60436	0.110453	0.00085362	0.0169102	0.0280391	0.0280391
RPS10-NUDT3	ENST00000639877.1	3.82674e-06	0.000464474	-1.05785	0.228943	5.54249	0.265465	0.0295785	0.0418992	0.049044	0.049044
MACF1	ENST00000469490.1	3.84596e-06	0.000464474	-0.878231	0.190112	5.73035	0.189776	0.0105649	0.0159973	0.0436492	0.0436492
CYCS	ENST00000409764.5	3.86315e-06	0.000465691	-0.844338	0.182812	7.31497	0.193106	0.00272904	0.0474013	0.0254142	0.0474013
CCDC141	ENST00000446116.5	3.89617e-06	0.000468808	-1.34766	0.291901	6.10777	0.477241	0.00358966	0.12422	0.0358299	0.12422
ZBTB44	ENST00000525842.5	4.09301e-06	0.000488898	-0.874437	0.189823	6.2629	0.283787	0.020557	0.032764	0.0334919	0.0334919
FRMD3	ENST00000328788.5	4.12712e-06	0.000491179	-1.2083	0.262395	5.85203	0.470229	0.00405745	0.0992196	0.0407417	0.0992196
ZNF736	ENST00000423484.3	4.23357e-06	0.000502023	-2.68092	0.582863	3.08364	2.02862	0.100099	0.0946175	0.409494	0.409494
LRRC49	ENST00000560158.6	4.25354e-06	0.000503479	-1.51803	0.330108	6.15048	1.0735	0.0117859	0.151671	0.0351435	0.151671
MYO18B	ENST00000536101.5	4.4575e-06	0.000519543	-1.52256	0.331797	7.05449	0.575039	0.0937206	0.0714131	0.0264463	0.0714131
SCOC	ENST00000394201.8	4.46069e-06	0.000519543	-0.621104	0.135356	7.16946	0.0931007	0.00155856	0.0175023	0.0259233	0.0259233
SET	ENST00000372686.5	4.57824e-06	0.000528533	-0.767683	0.167498	7.07033	0.2014	0.0157156	0.0164291	0.0263677	0.0263677
SLC8A1	ENST00000406785.6	4.61158e-06	0.00053051	-1.15355	0.251773	9.08449	0.392999	0.000141497	0.0949431	0.0328427	0.0949431
TTN	ENST00000460472.6	4.62831e-06	0.0005315	-2.19393	0.478924	10.5093	1.32181	0.000128334	0.343924	0.0711388	0.343924
RANBP6	ENST00000259569.5	4.66829e-06	0.000535153	-0.603077	0.1317	7.32563	0.0927828	0.000633939	0.0178112	0.0253834	0.0253834
LRRC49	ENST00000544974.6	4.78869e-06	0.000547039	-1.40103	0.306314	4.46587	0.540915	0.0205313	0.120211	0.113897	0.120211
SMPX	ENST00000379494.4	4.9833e-06	0.00056729	-1.21958	0.26713	7.91723	0.520128	0.00153324	0.105504	0.0250225	0.105504
DCAF6	ENST00000367843.7	5.04901e-06	0.000571836	-0.68522	0.150177	7.27361	0.135512	0.00592247	0.0279074	0.0255419	0.0279074
IMPA1	ENST00000256108.10	5.05188e-06	0.000571836	-0.820053	0.179733	5.74382	0.176032	0.00514925	0.00378989	0.0433066	0.0433066
RIT1	ENST00000368323.8	5.09863e-06	0.000575415	-0.648867	0.142274	6.86836	0.106015	0.00283146	0.00495168	0.0275314	0.0275314
EPM2AIP1	ENST00000322716.7	5.19097e-06	0.000583823	-0.637141	0.139818	7.52261	0.105893	0.000523638	0.0288002	0.0249717	0.0288002
NUDT4	ENST00000549992.5	5.33333e-06	0.000596458	-0.777099	0.170745	9.28135	0.194964	0.000121773	0.0436089	0.0356438	0.0436089
MAST4	ENST00000403625.6	5.37177e-06	0.000599012	-0.6603	0.14513	6.75114	0.102759	0.00321877	0.0212705	0.0283752	0.0283752
PPP1R12A	ENST00000450142.7	5.43497e-06	0.000603344	-0.603973	0.132821	7.81363	0.079304	0.00156581	0.0110115	0.0248964	0.0248964
MPC1	ENST00000360961.11	5.5704e-06	0.000615916	-0.706257	0.155492	6.29952	0.130469	0.00326772	0.0141161	0.032999	0.032999
C5orf24	ENST00000338051.4	5.64657e-06	0.000623284	-0.900387	0.198358	6.93634	0.268144	0.020358	0.0386606	0.0270998	0.0386606
STRN	ENST00000263918.9	5.75871e-06	0.000634592	-0.75338	0.166123	7.77258	0.147387	0.000555641	0.0408399	0.0248688	0.0408399
AKAP13	ENST00000560579.5	5.87834e-06	0.000645601	-6.18046	1.36412	2.44368	7.58078	2.14459	-1.59293	0.646658	0.646658
CUL3	ENST00000409096.5	5.90885e-06	0.000647866	-0.594426	0.131231	7.71848	0.0805461	0.000980685	0.0157118	0.0248516	0.0248516
FRMD3	ENST00000621208.4	5.94201e-06	0.000649326	-1.75441	0.38742	6.5851	1.13369	0.0856743	0.139467	0.0297998	0.139467
NFE2L1	ENST00000583060.1	5.9874e-06	0.000653196	-5.86981	1.29667	2.8225	8.35247	1.33085	1.19118	0.497964	1.19118
RPAP2	ENST00000610020.2	6.02954e-06	0.000655607	-0.691363	0.152776	7.30319	0.122261	0.000799916	0.0342107	0.0254492	0.0342107
NEBL	ENST00000377122.8	6.0857e-06	0.000659523	-1.27549	0.281976	9.65201	0.545496	8.73031e-05	0.119178	0.0426002	0.119178
TTBK2	ENST00000267890.11	6.10309e-06	0.000659809	-0.604032	0.133553	7.19989	0.0734899	0.000951774	0.00289726	0.0258029	0.0258029
PCMTD1	ENST00000522514.6	6.12908e-06	0.000660941	-0.63616	0.140685	6.95069	0.0844487	0.00267424	0.00652499	0.027014	0.027014
PSD3	ENST00000327040.13	6.22861e-06	0.000667277	-0.598559	0.132469	8.14199	0.0906537	0.000743213	0.023739	0.025579	0.025579
RIF1	ENST00000444746.6	6.39125e-06	0.00068098	-0.777197	0.172212	6.49964	0.146165	0.0138375	0.0194242	0.0306481	0.0306481
MAP3K20	ENST00000338983.7	6.44336e-06	0.00068357	-0.849605	0.188329	8.85905	0.240519	0.000168764	0.0530327	0.0302617	0.0530327
AC124312.1	ENST00000551312.6	6.64226e-06	0.000702395	-1.12807	0.250413	5.20908	0.325313	0.0106806	0.0833797	0.0619932	0.0833797
PCMT1	ENST00000649295.1	6.72304e-06	0.000707508	-0.668749	0.148536	6.64804	0.128512	0.00386752	0.0229367	0.0292269	0.0292269
NIPSNAP2	ENST00000322090.8	6.81146e-06	0.000713372	-0.7432	0.165174	7.85639	0.161545	0.00055057	0.0403731	0.0249387	0.0403731
AP1S2	ENST00000329235.6	6.98477e-06	0.000730355	-0.856847	0.190658	6.73133	0.208873	0.00200196	0.0525239	0.0285308	0.0525239
MARCHF7	ENST00000409591.5	7.00744e-06	0.000731556	-0.586472	0.130517	7.62196	0.0754123	0.000676895	0.00282591	0.024875	0.024875
RNMT	ENST00000543302.6	7.07398e-06	0.000735104	-2.309	0.514088	3.79309	1.09651	0.173923	-0.0982416	0.222506	0.222506
RAD50	ENST00000533482.5	7.05571e-06	0.000735104	-0.828957	0.184541	6.49417	0.178412	0.00818762	0.0428953	0.0307053	0.0428953
NOMO1	ENST00000620839.3	7.07511e-06	0.000735104	-5.92431	1.31903	2.40199	7.86349	1.94512	-0.285134	0.664644	0.664644
NEDD4	ENST00000508075.1	7.14562e-06	0.00073907	-0.722729	0.160989	6.13526	0.136174	0.00349211	0.0296156	0.0353841	0.0353841
SLC25A4	ENST00000281456.11	7.1445e-06	0.00073907	-0.704669	0.156965	7.23592	0.162724	0.00126016	0.0356969	0.0256699	0.0356969
FGD6	ENST00000343958.9	7.50612e-06	0.000768901	-0.585107	0.130639	7.7727	0.0754589	0.000730954	0.0118983	0.0248689	0.0248689
MOCS2	ENST00000450852.7	7.55378e-06	0.000770167	-0.614682	0.137284	6.93676	0.106819	0.001173	0.0192913	0.0270973	0.0270973
TNRC18	ENST00000440081.2	7.74452e-06	0.000785943	-0.995317	0.22256	5.27256	0.222396	0.0151524	0.029874	0.0591471	0.0591471
AFG3L2	ENST00000269143.7	7.77722e-06	0.00078804	-0.62998	0.140896	8.34364	0.110137	0.000280816	0.0294969	0.0264227	0.0294969
NNT	ENST00000512996.6	7.92568e-06	0.00079937	-0.592341	0.132598	8.24599	0.087521	0.000401512	0.0202879	0.025972	0.025972
BRWD1	ENST00000342449.7	7.93852e-06	0.000799434	-0.665583	0.149005	6.55897	0.12104	0.00325374	0.0239392	0.0300502	0.0300502
KAT6A	ENST00000649827.1	8.40607e-06	0.000843095	-4.56787	1.02543	3.2309	5.5891	1.21264	0.176365	0.364636	0.364636
NA	ENST00000327578.9	8.41073e-06	0.000843095	-0.671788	0.150813	6.63755	0.117109	0.00479726	0.0209574	0.0293194	0.0293194
NDUFB6	ENST00000379847.8	8.58747e-06	0.000859495	-0.721479	0.16213	6.11167	0.142628	0.00366366	0.0127559	0.0357658	0.0357658
ACADM	ENST00000420607.6	8.65639e-06	0.000865071	-0.707718	0.1591	6.41871	0.135496	0.0064357	0.0207679	0.0315333	0.0315333
NAV1	ENST00000367296.8	8.85163e-06	0.000883234	-1.33545	0.300541	7.18744	0.609884	0.00988098	0.125606	0.0258512	0.125606
LIN9	ENST00000366808.5	8.94835e-06	0.00088901	-1.35987	0.306199	5.3342	0.434974	0.0840704	0.0106652	0.056566	0.056566
HACD1	ENST00000466335.1	9.01871e-06	0.000893098	-1.07592	0.242354	6.17018	0.444832	0.00377749	0.0843258	0.0348381	0.0843258
FABP3	ENST00000373713.6	9.01866e-06	0.000893098	-0.811428	0.182776	8.58766	0.229816	0.000244822	0.049866	0.0279165	0.049866
KTN1	ENST00000438792.6	9.16842e-06	0.000905327	-0.62128	0.140057	8.16074	0.0905764	0.00378064	0.0116499	0.0256433	0.0256433
PIK3CA	ENST00000263967.4	9.28076e-06	0.000910781	-0.669021	0.150909	6.44057	0.104336	0.00287412	0.0238908	0.0312859	0.0312859
TPM1	ENST00000560970.6	9.53778e-06	0.000933206	-1.87064	0.422515	7.2593	1.19765	0.0562062	0.211572	0.0255892	0.211572
SEMA6D	ENST00000358066.8	9.66678e-06	0.000943009	-4.85435	1.09715	3.43418	6.74972	1.49697	-0.455813	0.308642	0.308642
CCDC69	ENST00000355417.7	9.76308e-06	0.000950985	-0.776091	0.175493	8.00245	0.163357	0.00063635	0.0455602	0.0251874	0.0455602
MPDZ	ENST00000447879.5	9.78213e-06	0.000951425	-0.991317	0.224182	6.9023	0.251339	0.0351696	0.0402166	0.0273108	0.0402166
UBE3A	ENST00000630424.2	9.85736e-06	0.000954598	-1.68671	0.381585	5.72268	0.661487	0.174563	-0.10244	0.043847	0.043847
PALM2AKAP2	ENST00000374525.5	9.9307e-06	0.000960168	-0.712406	0.161226	8.96458	0.180337	0.00100877	0.037982	0.0313925	0.037982
TTC3	ENST00000399017.6	1.00236e-05	0.000967717	-0.881185	0.199514	5.95379	0.191658	0.0117809	0.0479277	0.0386097	0.0479277
PALLD	ENST00000505667.6	1.00406e-05	0.000967934	-1.15144	0.260724	8.81851	0.464376	0.000515898	0.10145	0.0298614	0.10145
TMEM45A	ENST00000489060.1	1.0149e-05	0.000974085	-0.692186	0.156817	6.23353	0.116646	0.00298469	0.0298299	0.0339027	0.0339027
CACNA2D1	ENST00000356860.8	1.0752e-05	0.00102444	-1.00417	0.228143	6.37314	0.275606	0.00332783	0.0747462	0.0320697	0.0747462
ANKRD26	ENST00000376087.4	1.08398e-05	0.00102901	-0.649096	0.147532	6.56857	0.103188	0.00269111	0.019063	0.0299573	0.0299573
SCAI	ENST00000336505.10	1.08471e-05	0.00102901	-0.699533	0.159001	6.14092	0.107922	0.00262769	0.0189257	0.0352942	0.0352942
EIF1AY	ENST00000382772.3	1.08441e-05	0.00102901	-0.822155	0.18687	5.77007	0.173603	0.00972637	0.0203903	0.042654	0.042654
QSER1	ENST00000399302.7	1.10913e-05	0.00104763	-0.673674	0.153292	7.18726	0.0927972	0.0093955	0.000553702	0.0258519	0.0258519
NAP1L3	ENST00000373079.3	1.11414e-05	0.00104932	-0.838312	0.190797	6.64526	0.177074	0.00307741	0.0515276	0.0292513	0.0515276
CPEB4	ENST00000265085.10	1.11697e-05	0.00105048	-0.880989	0.200535	7.06822	0.195885	0.00287037	0.057451	0.0263781	0.057451
MTRNR2L8	ENST00000536684.2	1.12248e-05	0.00105264	-0.784983	0.178725	9.86608	0.213649	7.24894e-05	0.0165791	0.0478415	0.0478415
TPM1	ENST00000559556.5	1.14434e-05	0.00107007	-0.919244	0.209494	9.02361	0.208269	0.00208656	0.0637448	0.0320837	0.0637448
TNNT2	ENST00000455702.5	1.15831e-05	0.00108159	-1.29491	0.295284	7.89284	0.523672	0.00312516	0.127664	0.0249856	0.127664
CORIN	ENST00000273857.9	1.16805e-05	0.00108603	-1.57254	0.358744	6.67371	0.811412	0.00578969	0.187256	0.029005	0.187256
MASP1	ENST00000392470.6	1.18222e-05	0.0010961	-0.793933	0.181229	6.6458	0.238813	0.00896805	0.0402976	0.0292465	0.0402976
SDHB	ENST00000491274.5	1.18854e-05	0.0011004	-5.65106	1.29029	2.49961	6.5245	1.87421	-1.54268	0.623073	0.623073
DNAJB9	ENST00000249356.4	1.24226e-05	0.00114851	-0.600726	0.137465	6.92487	0.0804761	0.00117505	0.00715888	0.0271698	0.0271698
STRIP2	ENST00000249344.7	1.26096e-05	0.00115925	-1.25078	0.28643	7.40794	0.632728	0.00122641	0.121837	0.0251755	0.121837
KIF13A	ENST00000378814.9	1.27391e-05	0.00116561	-1.01974	0.233643	8.14962	0.258043	0.00280891	0.0790748	0.0256048	0.0790748
EEF1A1	ENST00000488500.1	1.275e-05	0.00116561	-0.969016	0.22203	9.6553	0.231788	0.000794429	0.0731513	0.0426731	0.0731513
RANBP2	ENST00000283195.11	1.28344e-05	0.00117169	-0.603754	0.138383	8.67202	0.0823812	0.000161129	0.0157822	0.0285638	0.0285638
ARHGAP42	ENST00000298815.13	1.28956e-05	0.00117261	-0.727903	0.166879	8.17088	0.139509	0.000425403	0.0413473	0.0256793	0.0413473
CFL2	ENST00000422678.2	1.28982e-05	0.00117261	-0.931386	0.213531	6.77878	0.276358	0.00370039	0.064693	0.0281646	0.064693
C12orf45	ENST00000552951.7	1.29738e-05	0.0011744	-0.765995	0.175665	6.78401	0.154932	0.00124772	0.0450395	0.0281256	0.0450395
MED13L	ENST00000281928.8	1.29702e-05	0.0011744	-0.76534	0.175512	6.0095	0.159762	0.00812603	0.0380808	0.0375457	0.0380808
ANK3	ENST00000616444.4	1.331e-05	0.00119684	-1.30492	0.299642	5.34738	0.442453	0.0298713	0.104807	0.0560364	0.104807
CBX5	ENST00000439541.6	1.3311e-05	0.00119684	-0.925851	0.212598	6.15386	0.212854	0.0106676	0.0571296	0.0350906	0.0571296
NUP98	ENST00000397007.8	1.34946e-05	0.00120837	-0.919073	0.211188	6.06304	0.227323	0.00742629	0.059474	0.0365866	0.059474
PTGES3L	ENST00000424284.5	1.37863e-05	0.00123112	-0.901391	0.207348	5.3897	0.338878	0.010103	0.0288647	0.0543868	0.0543868
DLAT	ENST00000533297.1	1.38662e-05	0.00123226	-0.60128	0.138354	7.03141	0.0992904	0.00214803	0.0220398	0.0265645	0.0265645
NMNAT3	ENST00000645507.1	1.38634e-05	0.00123226	-0.802681	0.184694	6.80149	0.162178	0.00164828	0.0495193	0.027997	0.0495193
MTERF2	ENST00000240050.9	1.40235e-05	0.00124046	-1.21376	0.279444	5.04369	0.342791	0.0467514	0.0306629	0.0703817	0.0703817
RAB21	ENST00000358546.3	1.43234e-05	0.00125954	-0.640056	0.147518	6.467	0.0914853	0.00164719	0.000728238	0.030995	0.030995
CDH8	ENST00000584337.5	1.43608e-05	0.00125954	-1.2198	0.281171	4.64725	0.441719	0.0211484	0.0546743	0.0974375	0.0974375
SON	ENST00000436227.5	1.43641e-05	0.00125954	-0.594147	0.136956	7.72202	0.10329	0.00328351	0.0243221	0.024852	0.024852
LAMA2	ENST00000617695.4	1.43606e-05	0.00125954	-2.00096	0.461234	6.34827	0.90133	0.28673	-0.0888969	0.0323748	0.0323748
QKI	ENST00000361195.6	1.48472e-05	0.00129753	-0.764081	0.176424	6.91874	0.155625	0.0128925	0.0337955	0.0272076	0.0337955
RSF1	ENST00000528095.5	1.55508e-05	0.0013422	-0.721313	0.166942	6.21553	0.129012	0.00764307	0.0292336	0.0341614	0.0341614
MRPS30	ENST00000230914.4	1.55494e-05	0.0013422	-0.72575	0.167968	5.90425	0.116037	0.00270418	0.0159306	0.0396158	0.0396158
CERS6	ENST00000392687.4	1.56731e-05	0.00134881	-0.766127	0.177385	7.83765	0.173745	0.00440614	0.042792	0.0249185	0.042792
COX7B	ENST00000647835.1	1.64889e-05	0.00140171	-0.832052	0.19315	6.90598	0.210601	0.00291771	0.0530428	0.0272874	0.0530428
MYL12B	ENST00000400175.9	1.6655e-05	0.00141033	-1.09103	0.253399	6.24428	0.497703	0.062566	-0.0201259	0.0337507	0.0337507
CCSER2	ENST00000224756.12	1.67432e-05	0.00141414	-0.660878	0.153535	7.18961	0.112381	0.00951676	0.0196843	0.0258427	0.0258427
ZC3H12C	ENST00000278590.8	1.67349e-05	0.00141414	-0.872943	0.202797	6.21877	0.20738	0.00411448	0.0575753	0.0341145	0.0575753
ACSS2	ENST00000253382.5	1.70139e-05	0.00143337	-1.2646	0.294034	5.70662	0.399991	0.0854174	0.0359842	0.0442664	0.0442664
NNT	ENST00000264663.9	1.70585e-05	0.00143337	-0.75206	0.174886	6.43884	0.159571	0.0060697	0.0398081	0.0313052	0.0398081
WNK1	ENST00000315939.11	1.72989e-05	0.00144753	-0.801317	0.186475	8.81518	0.169153	0.00144975	0.0507098	0.0298294	0.0507098
MTCO2P22	ENST00000603246.1	1.73376e-05	0.00144753	-1.12498	0.261826	4.73775	0.537341	0.0104107	0.0924183	0.09027	0.0924183
ARHGEF9	ENST00000253401.10	1.77493e-05	0.00147626	-0.871622	0.203106	7.42507	0.218922	0.00750938	0.0543684	0.0251387	0.0543684
C16orf87	ENST00000285697.9	1.79032e-05	0.00148528	-0.625417	0.1458	6.57671	0.107145	0.0020071	0.0168909	0.0298793	0.0298793
RICTOR	ENST00000296782.9	1.82504e-05	0.00150645	-0.908806	0.212076	6.37039	0.216703	0.0211873	0.046277	0.0321031	0.046277
CNOT11	ENST00000462489.1	1.84979e-05	0.00152304	-0.837766	0.195635	5.66091	0.283715	0.0119044	0.0194159	0.0455052	0.0455052
WBP11	ENST00000535638.5	1.8756e-05	0.00153848	-1.45422	0.339833	4.82738	0.455932	0.0894435	-0.0310287	0.0837861	0.0837861
CLIC4	ENST00000374379.9	1.87823e-05	0.00153872	-0.684722	0.160023	9.43582	0.11114	0.000159404	0.0224249	0.0382517	0.0382517
PKP2	ENST00000340811.8	1.89147e-05	0.00154569	-0.663143	0.155037	9.23206	0.106735	0.00116424	0.0195003	0.0348902	0.0348902
ATPAF1	ENST00000576409.5	1.91731e-05	0.00156485	-0.608195	0.142291	6.72171	0.0919969	0.00176233	0.0275725	0.0286077	0.0286077
ZNF106	ENST00000263805.8	1.95704e-05	0.00159331	-0.709309	0.166125	8.10588	0.127591	0.000547417	0.0408488	0.0254629	0.0408488
SELL	ENST00000236147.5	1.9999e-05	0.00161814	-2.31692	0.543252	3.75017	1.34684	0.0626225	0.380062	0.232092	0.380062
ITGB2	ENST00000397850.6	2.00945e-05	0.00162386	-4.0291	0.944947	2.10185	5.14964	0.534197	0.60712	0.805189	0.805189
AP1B1	ENST00000415447.5	2.0151e-05	0.00162641	-5.28529	1.23974	3.31745	6.46843	1.96549	-0.551726	0.33996	0.33996
TASOR2	ENST00000645567.1	2.04252e-05	0.00164449	-0.858757	0.201577	6.83328	0.18503	0.019805	0.041145	0.0277705	0.041145
SLMAP	ENST00000428312.5	2.04085e-05	0.00164449	-0.984344	0.231046	6.17617	0.315713	0.0227898	0.0572839	0.0347467	0.0572839
USP28	ENST00000003302.8	2.06745e-05	0.00165863	-0.795796	0.186917	7.70701	0.212575	0.00237982	0.0500272	0.0248507	0.0500272
CREBRF	ENST00000296953.6	2.06768e-05	0.00165863	-0.713799	0.167659	5.94854	0.112952	0.00345051	0.0158481	0.0387136	0.0387136
HACD1	ENST00000498812.5	2.09157e-05	0.00167272	-2.42803	0.570644	3.98501	1.44799	0.305288	-0.0469956	0.183165	0.183165
CD48	ENST00000368046.8	2.11277e-05	0.00168235	-3.22982	0.759489	2.42443	2.8781	0.210317	0.404689	0.654919	0.654919
NA	ENST00000643585.2	2.15131e-05	0.0017076	-0.612325	0.144125	7.90721	0.0940814	0.000883927	0.0302739	0.0250068	0.0302739
RAPGEF2	ENST00000644902.1	2.21261e-05	0.00174495	-0.882696	0.208071	7.36196	0.24306	0.00785042	0.05709	0.0252852	0.05709
SPPL2A	ENST00000261854.10	2.28379e-05	0.00178816	-0.604444	0.14272	6.70824	0.102255	0.00183666	0.0169788	0.0287169	0.0287169
PARM1	ENST00000307428.7	2.37003e-05	0.00184137	-0.798382	0.188884	6.80721	0.1597	0.00122718	0.0522887	0.0279555	0.0522887
NOTCH2NLA	ENST00000362074.7	2.38056e-05	0.0018419	-0.760515	0.179968	5.81714	0.12795	0.00704932	0.00165835	0.0415334	0.0415334
UBE2D3	ENST00000453744.7	2.4075e-05	0.00186054	-0.653837	0.154816	6.60771	0.114009	0.00466803	0.0312842	0.0295891	0.0312842
CISD1	ENST00000333926.6	2.42609e-05	0.0018661	-0.788791	0.186848	5.59801	0.151247	0.00504506	0.0194284	0.0473232	0.0473232
UNK	ENST00000586527.1	2.42404e-05	0.0018661	-0.742306	0.175829	5.76391	0.196207	0.00356808	0.0250413	0.0428055	0.0428055
PPM1K	ENST00000608933.6	2.44137e-05	0.00187125	-0.797003	0.188856	7.27847	0.193541	0.00112207	0.052378	0.0255262	0.052378
RAD50	ENST00000651541.1	2.48298e-05	0.00189737	-5.13092	1.21691	2.10261	5.94063	1.4165	-0.236352	0.804808	0.804808
UGP2	ENST00000640075.1	2.49074e-05	0.00189798	-0.742099	0.176035	6.56241	0.203689	0.00317083	0.0433115	0.0300168	0.0433115
NDUFB5	ENST00000359944.10	2.50542e-05	0.00190473	-0.648058	0.153776	6.60609	0.100837	0.00586638	0.0142283	0.029604	0.029604
SEPTIN5	ENST00000383045.7	2.64983e-05	0.00199139	-0.930545	0.221472	6.59148	0.223806	0.00927044	0.0643041	0.0297398	0.0643041
ADAM32	ENST00000633335.1	2.64738e-05	0.00199139	-5.14362	1.22413	1.8561	6.26647	1.31287	0.426687	0.934875	0.934875
POPDC2	ENST00000264231.7	2.67447e-05	0.0020076	-0.825526	0.196575	8.19732	0.316286	0.00116274	0.0567998	0.0257771	0.0567998
PMPCB	ENST00000249269.9	2.68281e-05	0.00201155	-0.866938	0.206471	5.37969	0.191978	0.00917518	0.0381028	0.05477	0.05477
MDH1	ENST00000233114.13	2.69087e-05	0.00201299	-0.724746	0.172634	9.15117	0.165231	0.000120038	0.0445837	0.0337304	0.0445837
DYNC1LI1	ENST00000413350.5	2.70537e-05	0.00202152	-4.8522	1.15613	2.26928	5.23486	1.28062	-1.04953	0.724325	0.724325
CAP2	ENST00000465994.5	2.72331e-05	0.00203261	-1.14526	0.272977	6.49762	0.36387	0.0137828	0.0979921	0.0306692	0.0979921
BTRC	ENST00000370187.8	2.80622e-05	0.00208498	-0.675685	0.161313	7.31118	0.10654	0.0136077	0.0142511	0.0254253	0.0254253
PPP1R12B	ENST00000618451.1	2.96924e-05	0.00218134	-2.48562	0.595243	2.98285	1.61746	0.0891748	0.329994	0.442297	0.442297
FASTKD2	ENST00000402774.8	2.96703e-05	0.00218134	-0.630312	0.150937	6.43364	0.115867	0.00280946	0.0182665	0.0313637	0.0313637
PDXK	ENST00000481512.5	2.96916e-05	0.00218134	-4.75577	1.13888	2.37119	5.46917	1.26742	-0.810868	0.67816	0.67816
FBXO3	ENST00000265651.8	3.1137e-05	0.00226208	-0.678422	0.162887	6.23446	0.144895	0.00590871	0.0305181	0.0338895	0.0338895
NDUFAF4	ENST00000316149.8	3.12848e-05	0.0022703	-0.840341	0.201816	5.39564	0.208319	0.0069329	0.0292904	0.0541614	0.0541614
CAP2	ENST00000378990.6	3.13553e-05	0.0022729	-0.76571	0.183915	7.61583	0.18451	0.00185246	0.0488845	0.0248788	0.0488845
DEK	ENST00000652576.1	3.15894e-05	0.00227933	-0.627602	0.150804	6.79001	0.107543	0.00603182	0.0225445	0.0280811	0.0280811
PALM2AKAP2	ENST00000482335.1	3.15397e-05	0.00227933	-0.781476	0.187762	5.72227	0.202013	0.00902438	0.0327494	0.0438575	0.0438575
ATE1	ENST00000369043.7	3.20981e-05	0.00230884	-0.590087	0.141914	6.95348	0.0940166	0.00321197	0.0178819	0.0269976	0.0269976
PYROXD1	ENST00000240651.14	3.22809e-05	0.0023169	-0.839002	0.201841	5.54557	0.216006	0.0121642	0.040056	0.0489454	0.0489454
SLC20A2	ENST00000520262.6	3.22587e-05	0.0023169	-1.23648	0.297453	7.21242	0.449409	0.0165525	0.116165	0.0257555	0.116165
ANKRD18A	ENST00000399703.6	3.23782e-05	0.0023188	-1.05109	0.252906	4.94379	0.471928	0.00917827	0.0867642	0.0762019	0.0867642
MCC	ENST00000302475.8	3.3114e-05	0.00235603	-1.18713	0.285991	7.49309	0.398612	0.0046151	0.118072	0.0250147	0.118072
USP53	ENST00000274030.10	3.38974e-05	0.00240392	-0.937156	0.226062	5.78815	0.222167	0.0291866	0.0474697	0.0422163	0.0474697
SNX6	ENST00000362031.9	3.40416e-05	0.00241153	-0.863135	0.208256	6.07548	0.181505	0.0286834	-0.00980011	0.0363721	0.0363721
ZNF638	ENST00000264447.9	3.42747e-05	0.00242224	-0.781005	0.18851	7.85281	0.155166	0.00150043	0.0518039	0.0249346	0.0518039
TRDN	ENST00000546248.5	3.44058e-05	0.00242683	-1.28127	0.309324	6.66156	0.549247	0.00237638	0.141145	0.0291091	0.141145
PDE4DIP	ENST00000369356.8	3.44937e-05	0.00243041	-1.38108	0.333468	7.99277	0.551304	0.00252639	0.164275	0.0251658	0.164275
DNAJC24	ENST00000465995.6	3.45566e-05	0.00243223	-0.663836	0.160302	6.08291	0.128056	0.00229961	0.0316776	0.0362456	0.0362456
NA	ENST00000640289.1	3.49208e-05	0.00244733	-0.751604	0.181602	6.28535	0.188274	0.0133185	0.0361503	0.0331873	0.0361503
PABPC4	ENST00000470443.5	3.53144e-05	0.00246963	-0.917773	0.221889	5.52373	0.192696	0.0242015	-0.00587719	0.0496509	0.0496509
CORIN	ENST00000503821.5	3.53823e-05	0.00247174	-1.5997	0.386799	4.55236	0.750629	0.0846815	0.139739	0.105679	0.139739
AP1S2	ENST00000452376.5	3.57119e-05	0.0024921	-1.75273	0.424021	4.32812	0.858251	0.140328	-0.042272	0.129363	0.129363
SAMD12	ENST00000445741.6	3.60477e-05	0.00250752	-0.841332	0.203641	5.36986	0.198172	0.00705387	0.0506464	0.0551504	0.0551504
KPNA5	ENST00000368564.6	3.61114e-05	0.00250928	-0.644452	0.156002	6.21679	0.111899	0.00236175	0.026676	0.0341432	0.0341432
DENND1B	ENST00000620048.6	3.67113e-05	0.00253354	-0.623106	0.150973	6.40673	0.0805599	0.00251787	0.00578986	0.0316715	0.0316715
AP5M1	ENST00000261558.8	3.66623e-05	0.00253354	-0.622874	0.150906	6.37177	0.101961	0.00207257	0.0203557	0.0320864	0.0320864
WDR13	ENST00000376729.10	3.69881e-05	0.00254053	-0.649845	0.157518	6.23138	0.123689	0.00328451	0.0275396	0.0339333	0.0339333
BZW2	ENST00000446596.5	3.71402e-05	0.00254564	-0.867636	0.210357	5.71798	0.163088	0.0224063	0.00534844	0.0439689	0.0439689
NRP1	ENST00000374822.8	3.73557e-05	0.00255773	-0.628664	0.152468	6.71716	0.098014	0.00622538	0.0125331	0.0286443	0.0286443
MIPOL1	ENST00000555870.5	3.76494e-05	0.00257246	-0.896967	0.217634	5.40227	0.219527	0.00624163	0.0648051	0.0539117	0.0648051
LARP4	ENST00000398473.7	3.77653e-05	0.002575	-0.597875	0.145089	6.90448	0.108246	0.00307556	0.0285007	0.027297	0.0285007
SORBS2	ENST00000650145.1	3.79689e-05	0.00258619	-0.880289	0.213688	7.723	0.242138	0.00215069	0.0663432	0.0248522	0.0663432
NUDT4P2	ENST00000578341.2	3.8502e-05	0.00261706	-0.602082	0.146268	7.01592	0.144881	0.00170161	0.0303899	0.0266465	0.0303899
DTNA	ENST00000554864.7	3.92144e-05	0.00264625	-1.43598	0.349211	5.41053	0.578775	0.022469	0.160454	0.0536029	0.160454
CD46	ENST00000493796.5	3.97183e-05	0.00267473	-4.61668	1.12352	2.08915	5.15286	1.08188	-0.213741	0.811568	0.811568
DST	ENST00000361203.7	3.97952e-05	0.00267716	-1.79777	0.437556	7.6213	0.82404	0.00184149	0.285342	0.0248754	0.285342
RRAGD	ENST00000359203.3	4.03281e-05	0.00269088	-5.53382	1.34787	2.30285	9.60518	0.898645	1.8265	0.708864	1.8265
FSD2	ENST00000561368.1	4.07477e-05	0.00271335	-1.72762	0.421043	3.8257	0.764816	0.0505143	0.17617	0.215402	0.215402
KLHL31	ENST00000370905.4	4.13847e-05	0.00274738	-1.33713	0.326161	6.04343	0.491543	0.00360945	0.155962	0.036931	0.155962
ANO6	ENST00000441606.2	4.16314e-05	0.00275538	-1.8363	0.448071	5.63238	0.878061	0.254838	-0.0448672	0.0463131	0.0463131
LARP7	ENST00000344442.10	4.19597e-05	0.0027743	-0.594985	0.145245	6.96687	0.0920939	0.00472491	0.0106194	0.0269194	0.0269194
KANSL3	ENST00000420155.5	4.31791e-05	0.00283877	-0.788402	0.192774	6.31418	0.304574	0.0229351	0.0255542	0.0328075	0.0328075
SVIL	ENST00000375398.6	4.42563e-05	0.0028911	-3.36621	0.824232	6.5252	2.50147	0.988653	-0.522273	0.0303855	0.0303855
DLD	ENST00000415325.5	4.51647e-05	0.00293288	-0.774065	0.189753	6.74585	0.155397	0.0255928	-0.00621591	0.0284164	0.0284164
RNF216	ENST00000389902.7	4.52616e-05	0.00293626	-0.847981	0.207898	6.04911	0.186452	0.00892494	0.0559073	0.0368304	0.0559073
DAB1	ENST00000485760.5	4.57155e-05	0.00296035	-3.95662	0.970588	1.67548	3.36557	0.374144	-0.257471	1.03892	1.03892
LMO7	ENST00000526528.1	4.5821e-05	0.00296374	-1.73884	0.426608	3.83267	0.841106	0.0590856	0.187119	0.213906	0.213906
KIF21A	ENST00000547108.5	4.60906e-05	0.0029753	-0.957738	0.23505	5.01777	0.219638	0.0110384	0.0274799	0.0718343	0.0718343
IDH3A	ENST00000560667.5	4.71535e-05	0.00302009	-1.13325	0.278488	5.39952	0.299028	0.0623186	0.0111722	0.0540148	0.0540148
CEP295	ENST00000325212.11	4.76119e-05	0.00304349	-0.643497	0.158222	6.17241	0.0988667	0.00274722	0.0248276	0.0348041	0.0348041
SLC8A1	ENST00000407929.6	4.78765e-05	0.00305444	-0.978453	0.240657	7.64695	0.271806	0.00275174	0.0841218	0.0248623	0.0841218
SORBS2	ENST00000437304.6	4.84413e-05	0.00307548	-0.979866	0.241167	8.41368	0.326384	0.00089165	0.0863504	0.0267964	0.0863504
CLIC5	ENST00000339561.11	4.86469e-05	0.00308554	-1.08392	0.266841	7.24524	0.355306	0.00156352	0.105243	0.0256372	0.105243
ANKRD50	ENST00000515641.1	4.96182e-05	0.00313803	-0.614272	0.151395	6.62436	0.0957681	0.00494316	0.028397	0.0294374	0.0294374
PLXNA4	ENST00000321063.8	4.97065e-05	0.00314058	-1.59017	0.391957	7.44237	0.73603	0.00394266	0.226503	0.0251038	0.226503
PTGER3	ENST00000370924.4	4.99985e-05	0.00315598	-1.27167	0.313557	4.60906	0.433378	0.0114471	0.13603	0.100662	0.13603
TTN	ENST00000414766.5	5.1059e-05	0.00321507	-2.79014	0.6888	5.13119	2.34967	0.0479349	0.663734	0.0657606	0.663734
SRSF3	ENST00000614136.1	5.1082e-05	0.00321507	-1.5522	0.383202	4.52986	0.695351	0.112517	0.0254379	0.107749	0.107749
CCDC141	ENST00000343876.6	5.14102e-05	0.00322333	-1.07872	0.266409	6.86075	0.371112	0.00163633	0.104825	0.0275823	0.104825
FGF12	ENST00000445105.6	5.13737e-05	0.00322333	-2.10053	0.51874	5.50278	1.58851	0.0102734	0.393363	0.0503445	0.393363
DENND4C	ENST00000602925.5	5.23573e-05	0.00327644	-0.776499	0.191973	6.24892	0.134878	0.0215944	0.00748058	0.0336857	0.0336857
USP53	ENST00000450251.5	5.31775e-05	0.00332141	-0.900559	0.222844	5.54471	0.225285	0.0255162	0.0102728	0.0489731	0.0489731
CACHD1	ENST00000290039.6	5.33864e-05	0.00332811	-1.11321	0.275527	7.37522	0.34032	0.00554094	0.108331	0.0252519	0.108331
ERC2	ENST00000288221.11	5.38753e-05	0.00335539	-1.12118	0.277646	4.85352	0.284851	0.0336275	0.0145788	0.0820035	0.0820035
MYCBP2	ENST00000357337.10	5.42819e-05	0.0033775	-1.26062	0.312314	6.7948	0.390358	0.118264	-0.00280133	0.0280459	0.0280459
FLNC	ENST00000346177.6	5.48553e-05	0.0034067	-0.885043	0.2194	9.60931	0.262011	0.00134021	0.0708647	0.0416711	0.0708647
TMTC1	ENST00000539277.6	5.55773e-05	0.00343875	-1.66356	0.412709	5.61687	0.878429	0.0101214	0.245371	0.0467636	0.245371
ATP13A3	ENST00000642744.1	5.57505e-05	0.00344595	-0.74519	0.184906	7.89588	0.187894	0.0113559	0.0399292	0.0249899	0.0399292
DDX23	ENST00000552369.5	5.62171e-05	0.00347151	-4.80638	1.1932	1.88152	5.99933	0.948975	1.1866	0.920838	1.1866
AFG3L2	ENST00000590811.1	5.63218e-05	0.0034747	-1.04556	0.259591	5.20449	0.252627	0.0388747	0.0245292	0.0622067	0.0622067
KRCC1	ENST00000347055.4	5.68536e-05	0.00349762	-0.631548	0.156887	6.17935	0.0860602	0.00222173	0.0060538	0.0346984	0.0346984
AKAP9	ENST00000356239.7	5.80449e-05	0.00355694	-0.650886	0.161887	7.73016	0.109268	0.00105914	0.0382519	0.0248534	0.0382519
SNRPN	ENST00000553597.5	5.94801e-05	0.00362851	-0.734924	0.183051	5.72243	0.148873	0.00640795	0.0328534	0.0438535	0.0438535
FGF13	ENST00000305414.8	5.99938e-05	0.00364964	-1.06546	0.265512	5.6802	0.310288	0.00680337	0.0989417	0.0449744	0.0989417
PRKAA2	ENST00000371244.9	6.02289e-05	0.00365715	-0.728773	0.181652	6.87866	0.132628	0.022033	0.00408705	0.0274633	0.0274633
ANK2	ENST00000514960.5	6.06098e-05	0.00367346	-0.965341	0.240708	6.80165	0.265095	0.00343689	0.0834736	0.0279958	0.0834736
PRSS44P	ENST00000515154.2	6.2355e-05	0.00375835	-1.25613	0.313741	4.49708	0.480827	0.0147244	0.132926	0.110847	0.132926
PLXNA4	ENST00000359827.7	6.31622e-05	0.00378956	-1.44863	0.362097	6.02086	0.553128	0.0569206	0.139751	0.0373373	0.139751
ZNF710	ENST00000560908.1	6.35264e-05	0.00380096	-1.08166	0.270461	4.71545	0.246329	0.0177477	0.00687468	0.0919761	0.0919761
NUB1	ENST00000483358.5	6.36827e-05	0.00380683	-0.944586	0.236221	5.28359	0.217308	0.0250281	0.0151775	0.0586727	0.0586727
PLCL1	ENST00000487695.6	6.43443e-05	0.00383238	-1.17806	0.294789	6.02986	0.537856	0.00661962	0.123731	0.037174	0.123731
TAF5L	ENST00000366675.3	6.68979e-05	0.00395925	-0.975965	0.244783	4.87337	0.241317	0.00919664	0.0283046	0.0806817	0.0806817
HOMER1	ENST00000535690.1	6.84812e-05	0.00403836	-0.923403	0.231923	5.05989	0.239703	0.0111886	0.0240388	0.069494	0.069494
MAP3K20	ENST00000539448.5	6.87183e-05	0.00404505	-1.41917	0.356514	5.84842	0.526364	0.020997	0.169656	0.0408222	0.169656
AKAP6	ENST00000557354.5	6.89504e-05	0.00405506	-1.25233	0.314666	4.53634	0.553636	0.0374907	0.111031	0.107148	0.111031
CLIP4	ENST00000320081.10	6.91641e-05	0.00406398	-0.690845	0.173617	5.91121	0.179461	0.00574307	0.0295774	0.039471	0.039471
PALM2AKAP2	ENST00000374530.7	7.02662e-05	0.00411029	-1.13929	0.286586	8.42677	0.394877	0.00341749	0.11978	0.026871	0.11978
PARN	ENST00000341484.11	7.07006e-05	0.00412832	-3.24124	0.81563	3.07607	2.88308	0.576303	0.421575	0.4119	0.421575
PARN	ENST00000634004.1	7.07006e-05	0.00412832	-3.24124	0.81563	3.07607	2.88308	0.576303	0.421575	0.4119	0.421575
ENSA	ENST00000513281.5	7.12742e-05	0.0041545	-1.13717	0.286296	5.5369	0.373908	0.0737251	0.0257059	0.0492234	0.0492234
APOOL	ENST00000373173.7	7.12759e-05	0.0041545	-0.593431	0.149404	6.77432	0.0959275	0.00528419	0.0208754	0.0281982	0.0281982
PUM2	ENST00000319801.9	7.16319e-05	0.00416843	-0.699261	0.176101	6.76235	0.110745	0.0182283	-0.00103792	0.028289	0.028289
PIK3R1	ENST00000336483.9	7.1705e-05	0.00416843	-0.942538	0.237382	6.37934	0.256533	0.00926484	0.0752603	0.0319951	0.0752603
VPS37A	ENST00000324849.9	7.32015e-05	0.00422535	-0.659186	0.166225	6.10545	0.107983	0.00557776	0.0292655	0.0358682	0.0358682
LYRM2	ENST00000517396.5	7.34523e-05	0.00422955	-0.649844	0.163903	6.19338	0.110691	0.00580858	0.0192193	0.0344876	0.0344876
EIF1AY	ENST00000361365.7	7.3468e-05	0.00422955	-0.587503	0.148181	6.55426	0.0993425	0.00284027	0.0245609	0.0300962	0.0300962
KIAA1328	ENST00000586501.1	7.36163e-05	0.00423064	-0.622875	0.157122	6.17836	0.106483	0.00231735	0.0327934	0.0347134	0.0347134
ITFG1	ENST00000544001.6	7.42723e-05	0.00424968	-0.826185	0.208518	6.31528	0.188187	0.00948015	0.0557397	0.0327934	0.0557397
ZNF302	ENST00000446502.6	7.52239e-05	0.00428914	-0.925925	0.233871	5.27805	0.216476	0.0231333	0.029309	0.0589101	0.0589101
TSC22D3	ENST00000372397.6	7.58223e-05	0.00430824	-0.865436	0.218697	6.67976	0.222559	0.00578417	0.0659584	0.0289537	0.0659584
DLD	ENST00000417551.5	7.79262e-05	0.00441629	-0.599159	0.151659	6.97616	0.10536	0.0076347	0.0197137	0.0268661	0.0268661
FGF1	ENST00000621536.4	8.30442e-05	0.00462624	-6.00092	1.52484	2.66411	9.37527	1.28542	2.20229	0.557092	2.20229
NR1D2	ENST00000312521.9	8.4066e-05	0.00467917	-0.590811	0.150238	6.88393	0.108309	0.00242213	0.031435	0.0274289	0.031435
AC241952.1	ENST00000612480.2	8.46095e-05	0.00470419	-0.914722	0.232697	6.13914	0.240175	0.00390041	0.0773215	0.0353223	0.0773215
KIDINS220	ENST00000569008.2	8.46592e-05	0.00470419	-0.837984	0.213183	5.68243	0.204433	0.00649602	0.0616748	0.0449138	0.0616748
MAN1C1	ENST00000374332.8	8.61606e-05	0.00476336	-0.768293	0.195665	7.65781	0.193226	0.000995117	0.0564318	0.0248582	0.0564318
CUTC	ENST00000370476.10	8.63608e-05	0.00477039	-0.75109	0.191311	5.57103	0.155925	0.00675432	0.0294458	0.0481453	0.0481453
ADAMTS9	ENST00000295903.8	8.66212e-05	0.00478075	-0.747739	0.190492	7.67137	0.156736	0.00859345	0.0458374	0.0248543	0.0458374
ADAM23	ENST00000264377.8	8.7201e-05	0.00480464	-1.11307	0.28368	6.66036	0.405439	0.0025715	0.11814	0.0291195	0.11814
PICALM	ENST00000530692.5	8.73264e-05	0.00480751	-0.753761	0.192122	5.67271	0.173647	0.0101871	0.0290786	0.0451791	0.0451791
PGM5	ENST00000396396.6	8.96017e-05	0.00492035	-0.800372	0.204325	7.21366	0.229527	0.00098068	0.0616424	0.0257509	0.0616424
ETF1	ENST00000503014.5	8.97746e-05	0.00492571	-0.605322	0.15455	6.63359	0.0982858	0.0064737	0.0247159	0.0293547	0.0293547
PDE4DIP	ENST00000369347.8	9.06278e-05	0.0049642	-1.05954	0.270678	7.01649	0.32185	0.0013289	0.108571	0.0266434	0.108571
HMBOX1	ENST00000287701.15	9.07703e-05	0.00496448	-0.746128	0.190629	5.94735	0.145277	0.00929171	0.0452177	0.0387372	0.0452177
SETX	ENST00000224140.6	9.07845e-05	0.00496448	-0.619271	0.15822	7.94517	0.100803	0.000630664	0.0369197	0.0250705	0.0369197
ACOT13	ENST00000476436.1	9.1086e-05	0.00496851	-0.65483	0.167339	5.98684	0.121509	0.00403359	0.0329512	0.0379701	0.0379701
BEX3	ENST00000372634.1	9.25133e-05	0.00503379	-0.686422	0.175581	6.53077	0.130922	0.0159137	0.00564866	0.0303293	0.0303293
CCAR1	ENST00000540210.5	9.60867e-05	0.00518085	-0.818377	0.209826	6.21794	0.227117	0.0319138	0.0169599	0.0341266	0.0341266
CKAP5	ENST00000526496.1	9.59555e-05	0.00518085	-4.00224	1.02606	2.13461	3.4892	0.790301	-0.374725	0.788893	0.788893
CYTIP	ENST00000264192.8	9.60804e-05	0.00518085	-4.01988	1.03066	2.00837	5.16101	0.180586	1.41281	0.852955	1.41281
BMT2	ENST00000297145.9	9.60212e-05	0.00518085	-0.890713	0.228363	7.34096	0.228737	0.000917077	0.0773071	0.0253407	0.0773071
MAP4K4	ENST00000625522.2	9.71201e-05	0.00522366	-1.64889	0.423044	7.29401	0.715071	0.140266	0.128183	0.0254772	0.128183
KLHDC8B	ENST00000462582.1	9.82723e-05	0.00527263	-0.999294	0.25657	5.68259	0.424829	0.0342121	0.0645302	0.0449094	0.0645302
USF2	ENST00000343550.9	9.87031e-05	0.00528708	-0.909153	0.23349	5.71547	0.38153	0.037742	0.0416655	0.0440342	0.0440342
PABPC4	ENST00000372862.7	9.91575e-05	0.00529841	-1.65437	0.425	5.46555	0.729135	0.219319	0.0399285	0.0516188	0.0516188
FHOD3	ENST00000590592.5	0.000103094	0.00549085	-1.03861	0.267463	8.49756	0.341866	0.000876879	0.106428	0.0273014	0.106428
ILDR2	ENST00000271417.8	0.000103685	0.00550037	-1.07013	0.275679	6.17087	0.318801	0.00281561	0.111182	0.0348276	0.111182
GAB1	ENST00000262995.8	0.000104445	0.00553577	-0.881119	0.227091	7.16745	0.209346	0.00131405	0.0760415	0.0259315	0.0760415
MASP1	ENST00000460839.5	0.000106136	0.00559819	-1.02816	0.265254	5.47708	0.420118	0.025777	0.0797627	0.0512182	0.0797627
PURA	ENST00000331327.4	0.000106511	0.00560894	-0.664899	0.171575	6.32151	0.117219	0.00199436	0.0421628	0.0327131	0.0421628
CACNA2D1	ENST00000356253.9	0.000106846	0.00561755	-0.954871	0.246451	6.05532	0.241517	0.00706689	0.08404	0.0367212	0.08404
NOL7	ENST00000474485.1	0.000112073	0.00585941	-0.664675	0.172069	6.00731	0.141964	0.00682517	0.00660237	0.0375863	0.0375863
TPM1	ENST00000403994.8	0.000112294	0.00586624	-0.898845	0.232719	10.4759	0.36758	0.000198047	0.0810389	0.0695849	0.0810389
TMEM38B	ENST00000374692.8	0.000112571	0.00587603	-0.785291	0.20335	5.35527	0.160711	0.00630425	0.0193528	0.0557228	0.0557228
ANTXR2	ENST00000449651.5	0.000113258	0.00590247	-0.742274	0.192285	6.51044	0.151449	0.00457414	0.0508862	0.0305361	0.0508862
PRDM8	ENST00000515013.5	0.000113942	0.00593141	-4.0603	1.05222	2.12742	3.8287	0.868288	0.112661	0.792448	0.792448
NEBL	ENST00000493005.5	0.000114595	0.0059532	-0.991243	0.256971	5.66004	0.513103	0.0114678	0.0875833	0.0455294	0.0875833
OXR1	ENST00000297447.10	0.000115391	0.00598982	-0.863285	0.223897	5.40155	0.192455	0.0212562	0.0378181	0.0539388	0.0539388
PTPRM	ENST00000400060.8	0.000115782	0.00599585	-0.610641	0.158407	6.93222	0.118049	0.0103611	0.027278	0.0271249	0.027278
COX7C	ENST00000511472.5	0.000116255	0.00601556	-0.80331	0.208441	6.00609	0.238476	0.00603988	0.0591317	0.0376088	0.0591317
CLIP1	ENST00000537123.2	0.000117568	0.00606435	-0.990383	0.257166	5.19402	0.29908	0.00551602	0.0936855	0.0626974	0.0936855
ATP5PF	ENST00000284971.7	0.000119598	0.00611126	-0.613489	0.159474	7.39682	0.132253	0.000994129	0.0371538	0.0252005	0.0371538
NBPF14	ENST00000581201.5	0.000120744	0.00615063	-4.38371	1.14022	4.25051	5.59186	1.4151	0.53506	0.139604	0.53506
RO60	ENST00000367446.7	0.000121024	0.00615532	-4.85773	1.2637	2.4909	6.11568	1.76871	-1.22477	0.626707	0.626707
GOT1	ENST00000370508.7	0.000122003	0.00619546	-0.655203	0.170534	8.18035	0.130502	0.000321049	0.0433017	0.0257137	0.0433017
KLHL41	ENST00000284669.2	0.000121988	0.00619546	-0.935772	0.243558	7.40409	0.236378	0.000686006	0.0882946	0.025184	0.0882946
MASP1	ENST00000169293.10	0.000122396	0.00621061	-1.03785	0.270184	7.67527	0.411893	0.00134073	0.108158	0.0248535	0.108158
PDLIM5	ENST00000615540.4	0.000122802	0.00622637	-1.34396	0.349948	8.98889	0.657148	0.00357788	0.180117	0.0316719	0.180117
PDHA1	ENST00000481733.1	0.000123173	0.00623068	-0.61664	0.160595	6.12784	0.124854	0.00318288	0.0343805	0.0355031	0.0355031
PPP1R13B	ENST00000557082.5	0.000126403	0.00634995	-1.77771	0.463747	4.66467	0.852309	0.0707179	0.251874	0.0960072	0.251874
RHOQ	ENST00000238738.9	0.000127592	0.00639491	-0.944879	0.246636	8.40382	0.263347	0.0003183	0.0909259	0.0267412	0.0909259
OGA	ENST00000370094.7	0.000128595	0.0064403	-1.46545	0.382711	4.1213	0.52101	0.0605429	0.0857446	0.159158	0.159158
FSIP2	ENST00000429412.1	0.000128948	0.00644808	-0.86189	0.225127	5.28195	0.213146	0.00826966	0.0677537	0.0587429	0.0677537
ANK2	ENST00000510275.6	0.000129218	0.00645174	-1.75545	0.458589	4.88995	0.947576	0.179273	0.136183	0.0795975	0.136183
MAP3K7	ENST00000369332.7	0.000130852	0.0065226	-0.587492	0.153599	7.29506	0.0915623	0.00315812	0.0322307	0.025474	0.0322307
GCNT2	ENST00000644492.1	0.000130965	0.0065226	-1.03566	0.270786	6.05245	0.365973	0.0210171	0.0889707	0.0367715	0.0889707
ARHGAP5	ENST00000539826.6	0.000131796	0.00653442	-0.596191	0.155945	7.60448	0.0948838	0.00337752	0.0331008	0.0248867	0.0331008
MTX3	ENST00000512528.2	0.000132008	0.0065362	-0.625477	0.163623	6.43439	0.086113	0.00880337	0.00549977	0.0313552	0.0313552
RAD23B	ENST00000416373.6	0.000132622	0.00655171	-1.48771	0.389295	5.73466	0.916863	0.0726779	0.154648	0.0435391	0.154648
USP9Y	ENST00000651177.1	0.000136675	0.00669136	-0.600144	0.157348	7.64796	0.0991333	0.000895654	0.0362421	0.0248619	0.0362421
ANO5	ENST00000324559.8	0.000139	0.00677477	-1.05005	0.275607	6.41727	0.294183	0.00195563	0.111984	0.0315498	0.111984
AC114801.3	ENST00000510231.1	0.000139445	0.00678633	-5.28259	1.38682	2.91026	10.9629	0.478318	2.40657	0.466969	2.40657
MSS51	ENST00000299432.7	0.000139975	0.00680204	-1.01886	0.267543	5.33811	0.39641	0.00858617	0.0987826	0.056408	0.0987826
TBL1XR1	ENST00000637659.1	0.00014227	0.00690332	-0.588933	0.154812	6.46772	0.0832682	0.00496272	0.0146328	0.0309873	0.0309873
ZEB1	ENST00000320985.14	0.00014347	0.00695122	-1.22583	0.322409	5.96752	0.411946	0.0172105	0.138711	0.0383411	0.138711
TET2	ENST00000380013.8	0.000144648	0.00700311	-0.658752	0.173352	6.97742	0.111792	0.0182175	0.0175682	0.026859	0.026859
LYST	ENST00000389793.6	0.000145364	0.00701704	-0.787457	0.207288	5.51118	0.144416	0.0143881	0.0191725	0.0500643	0.0500643
CHCHD6	ENST00000514908.5	0.00014522	0.00701704	-4.69782	1.23656	1.75943	5.53798	1.30402	0.530346	0.989605	0.989605
UCK1	ENST00000372210.7	0.000147208	0.00709034	-5.34572	1.40835	2.41193	6.6244	2.31485	-1.18691	0.660327	0.660327
MEF2A	ENST00000354410.9	0.000148211	0.00712819	-0.886629	0.233689	7.22385	0.233538	0.00589239	0.0760237	0.0257133	0.0760237
GSE1	ENST00000412692.5	0.000151349	0.0072631	-0.841988	0.222228	7.10752	0.300672	0.0145668	0.0595112	0.0261915	0.0595112
FSIP2	ENST00000424728.6	0.000152577	0.00731128	-0.965831	0.25505	4.86739	0.266629	0.0108922	0.0866832	0.0810768	0.0866832
MYOZ2	ENST00000307128.5	0.00015396	0.00735622	-1.18933	0.314257	8.26975	0.518854	0.000285652	0.14785	0.0260743	0.14785
MTR	ENST00000366576.3	0.000155334	0.00738946	-0.598372	0.1582	6.51862	0.0959229	0.00708842	0.013705	0.0304523	0.0304523
MYO18A	ENST00000530254.6	0.000160056	0.00758088	-1.15591	0.306208	8.17726	0.366012	0.00106547	0.139579	0.0257024	0.139579
DCUN1D1	ENST00000632685.1	0.000160047	0.00758088	-0.708176	0.187599	5.95033	0.142519	0.0141122	0.0291632	0.0386781	0.0386781
CORIN	ENST00000508498.5	0.000162384	0.0076745	-1.36896	0.362993	5.89786	0.634715	0.0664092	0.131236	0.0397501	0.131236
SMCHD1	ENST00000577880.5	0.000165275	0.00777185	-0.756506	0.200829	6.26348	0.128729	0.0270145	0.000802417	0.0334839	0.0334839
LRIF1	ENST00000485275.2	0.00016511	0.00777185	-0.644203	0.171005	5.94525	0.107071	0.00508469	0.0201712	0.0387791	0.0387791
ARHGAP5	ENST00000433497.5	0.000171967	0.0080003	-0.604551	0.160913	6.24799	0.100143	0.00514103	0.0333657	0.0336986	0.0336986
H2BC20P	ENST00000564237.2	0.000172491	0.00800193	-0.79062	0.210482	5.25584	0.225517	0.00657624	0.056959	0.0598778	0.0598778
UNC45B	ENST00000268876.9	0.000172353	0.00800193	-1.16747	0.310793	7.13538	0.530885	0.0113616	0.133527	0.026067	0.133527
PUM1	ENST00000373747.7	0.00017244	0.00800193	-0.795787	0.211854	6.87063	0.14983	0.0398067	-0.000869188	0.0275163	0.0275163
NIPBL	ENST00000504430.5	0.00017276	0.00800321	-2.08199	0.554334	5.08878	0.96235	0.392982	-0.193618	0.0679473	0.0679473
EPHA7	ENST00000369303.9	0.000175319	0.00809869	-0.788835	0.210235	6.92622	0.181749	0.00122202	0.0650761	0.0271615	0.0650761
CACNA1C	ENST00000399655.5	0.000176447	0.00812787	-1.29503	0.345291	7.10991	0.559914	0.00101299	0.177826	0.0261806	0.177826
CACNA1C	ENST00000644235.1	0.000176447	0.00812787	-1.29503	0.345291	7.10991	0.559914	0.00101299	0.177826	0.0261806	0.177826
RAB2A	ENST00000530071.5	0.000176655	0.0081317	-0.793852	0.211679	5.85848	0.1914	0.0266134	0.00978642	0.0405988	0.0405988
RPS24	ENST00000645440.1	0.000176795	0.00813243	-1.04886	0.279692	7.87121	0.376302	0.00199388	0.115348	0.0249565	0.115348
OGDH	ENST00000444676.5	0.000177543	0.00816113	-1.3704	0.365538	5.69207	0.508191	0.0616228	0.138804	0.0446535	0.138804
ACTN2	ENST00000366578.6	0.000178616	0.00819316	-1.0848	0.289473	8.93172	0.440399	0.000459888	0.125232	0.0310263	0.125232
UBR3	ENST00000418381.5	0.000178609	0.00819316	-5.867	1.56558	3.33306	13.1993	1.11604	2.56052	0.335644	2.56052
BPTF	ENST00000644067.1	0.000179218	0.00820356	-0.731896	0.195347	7.00567	0.144353	0.0197617	0.0374792	0.0267018	0.0374792
CDH8	ENST00000299345.10	0.000180212	0.0082433	-1.24906	0.333504	4.42764	0.566084	0.0489897	0.0563466	0.117848	0.117848
RBMS1	ENST00000392753.7	0.000180637	0.00825117	-0.874866	0.23363	6.93881	0.368575	0.0547896	0.0125379	0.0270849	0.0270849
AP1M1	ENST00000291439.7	0.000182927	0.00832096	-0.854052	0.228265	5.0694	0.220016	0.00917792	0.051085	0.0689793	0.0689793
MFF	ENST00000349901.11	0.000182801	0.00832096	-4.37626	1.1696	3.06513	5.10262	1.63655	0.0651741	0.415393	0.415393
SSBP2	ENST00000320672.8	0.000184541	0.00838252	-0.817828	0.218712	5.22777	0.177949	0.0106175	0.0394427	0.061135	0.061135
USP13	ENST00000263966.8	0.00018535	0.00840272	-0.951378	0.254502	7.54901	0.287948	0.000838454	0.0963187	0.0249388	0.0963187
NA	ENST00000429665.3	0.000186348	0.00842973	-1.71373	0.458603	3.55975	0.868615	0.0382612	0.272608	0.277214	0.277214
XIRP1	ENST00000340369.4	0.000186736	0.0084356	-1.10746	0.296404	8.52864	0.438369	0.00141258	0.13037	0.027505	0.13037
SLC25A46	ENST00000513807.5	0.000187298	0.00844934	-0.639188	0.171109	6.01534	0.0911323	0.00647928	0.00886659	0.0374382	0.0374382
HSF2	ENST00000368455.8	0.000187275	0.00844934	-0.786807	0.210625	5.87633	0.150308	0.0263349	0.00346008	0.0402092	0.0402092
VPS26A	ENST00000489794.1	0.000188118	0.00848049	-0.902282	0.24161	5.18308	0.214279	0.0243467	0.0353496	0.0632162	0.0632162
SREBF2	ENST00000462539.1	0.00018853	0.00848734	-4.57931	1.22641	3.12426	5.64233	0.949492	1.30663	0.396759	1.30663
ZC3H14	ENST00000302216.12	0.000189275	0.00850982	-0.704624	0.18876	5.83417	0.11913	0.0123023	-0.00656827	0.041143	0.041143
RAPGEF2	ENST00000504604.5	0.000190726	0.00856852	-2.39123	0.64091	3.45239	1.11609	0.312191	-0.259088	0.303957	0.303957
PAM	ENST00000455264.6	0.000192683	0.00862683	-0.821847	0.220427	7.83683	0.280078	0.00818759	0.0646948	0.0249177	0.0646948
SIPA1L2	ENST00000366630.5	0.000193428	0.00864247	-1.19055	0.3194	9.32282	0.386544	0.00349182	0.149533	0.0363064	0.149533
BZW2	ENST00000258761.8	0.000197058	0.00877429	-0.629939	0.169213	8.01703	0.134629	0.00390333	0.0390462	0.0252212	0.0390462
XPO1	ENST00000406957.5	0.000197978	0.00880371	-0.661335	0.177703	6.67287	0.122961	0.0183552	0.0168809	0.0290122	0.0290122
EXOC6B	ENST00000634650.1	0.000198781	0.00882141	-2.13515	0.573878	3.76861	0.906297	0.26606	-0.199184	0.227943	0.227943
RCAN2	ENST00000371374.5	0.000199024	0.00882622	-1.22403	0.329017	6.96237	0.403333	0.00469969	0.157679	0.0269455	0.157679
PPARGC1A	ENST00000506055.5	0.000200562	0.00888239	-0.880981	0.236931	5.28298	0.200487	0.0255054	0.0411861	0.0586988	0.0586988
OSBPL9	ENST00000447887.5	0.00020097	0.00889445	-0.804338	0.216348	6.51533	0.175972	0.0206382	0.0495716	0.0304859	0.0495716
BCO2	ENST00000531169.5	0.00020195	0.0089318	-1.26255	0.339709	4.64226	0.428721	0.0403837	0.13272	0.0978519	0.13272
TLK1	ENST00000359766.7	0.00020846	0.00915785	-0.813486	0.219355	5.68183	0.189062	0.0272448	0.0127518	0.04493	0.04493
NDUFA5	ENST00000611607.4	0.000208333	0.00915785	-1.60405	0.432511	4.95657	0.646483	0.205176	-0.00596721	0.0754231	0.0754231
BIRC6	ENST00000648282.1	0.000213964	0.00938701	-0.745842	0.201474	6.66886	0.150493	0.0124165	0.0484709	0.0290464	0.0484709
PABPC1	ENST00000519004.5	0.00022006	0.00959584	-5.95903	1.61282	3.59569	14.2419	1.64447	2.2573	0.268441	2.2573
TEAD3	ENST00000402886.8	0.000221981	0.00966103	-5.8811	1.59268	3.09008	9.68823	0.967751	2.83718	0.407456	2.83718
ZNF571	ENST00000451802.6	0.000223997	0.00973585	-4.38201	1.18744	2.11744	4.60567	1.31763	-1.12889	0.797405	0.797405
ADAM23	ENST00000374415.7	0.000226878	0.00982822	-1.1175	0.30309	6.02343	0.369681	0.0071282	0.130667	0.0372904	0.130667
DPY19L2P1	ENST00000458672.5	0.000231595	0.00995371	-1.26881	0.344616	4.20991	0.506994	0.0214487	0.156692	0.14541	0.156692
SMPX	ENST00000494525.1	0.000231235	0.00995371	-1.14207	0.310161	4.53906	0.520185	0.0374027	0.0505289	0.106897	0.106897
EIF1	ENST00000310837.8	0.000232187	0.00997261	-1.09243	0.296764	6.61529	0.474735	0.0559099	0.0761931	0.0295197	0.0761931
NOTCH2NLA	ENST00000579793.6	0.000233388	0.0100176	-0.768268	0.208778	5.30978	0.130776	0.00781473	0.0178218	0.0575677	0.0575677
TRMT9B	ENST00000524591.7	0.000237073	0.0100955	-1.14896	0.312572	4.5042	0.365355	0.0363856	0.107184	0.110166	0.110166
CDC14B	ENST00000412285.6	0.000237208	0.0100955	-0.646427	0.175865	7.00548	0.120537	0.00653884	0.0398541	0.0267028	0.0398541
MLF1	ENST00000651874.1	0.000238436	0.0101346	-0.903224	0.245817	5.8255	0.255246	0.0254054	0.0652338	0.0413408	0.0652338
ATP6V1C1	ENST00000521514.5	0.00023949	0.0101728	-0.658864	0.179368	5.86553	0.115115	0.00781547	0.0237104	0.040444	0.040444
NOTCH2	ENST00000602566.6	0.00024053	0.0101971	-1.12395	0.306075	4.6096	0.370073	0.0399068	0.0247276	0.100616	0.100616
PDHA1	ENST00000379804.1	0.0002414	0.010219	-0.669191	0.182281	6.87251	0.146941	0.00155392	0.0482854	0.0275039	0.0482854
ERBB4	ENST00000342788.9	0.000250428	0.0104543	-1.90144	0.519261	6.42032	1.06777	0.0367899	0.367658	0.0315149	0.367658
DPY19L2P1	ENST00000436258.1	0.000253669	0.0105492	-1.25486	0.342995	4.12466	0.430672	0.0178582	0.0675824	0.15861	0.15861
CAMK2D	ENST00000513132.5	0.000254183	0.0105638	-1.11089	0.303686	6.8432	0.435655	0.0055884	0.132749	0.0277017	0.132749
USP16	ENST00000399975.7	0.000256998	0.0106491	-0.840038	0.229821	5.94139	0.253529	0.0403703	0.0267459	0.0388562	0.0388562
TMEM126B	ENST00000529197.1	0.000261309	0.0107847	-1.0211	0.279683	5.25557	0.252029	0.0574442	-0.0381496	0.0598898	0.0598898
ACADM	ENST00000370834.9	0.000261962	0.0108046	-0.888205	0.243326	5.51625	0.197527	0.0389144	-0.00167666	0.0498967	0.0498967
PIAS2	ENST00000585916.6	0.00026364	0.0108535	-0.675935	0.185257	5.66579	0.129478	0.00444651	0.0470337	0.0453699	0.0470337
RDX	ENST00000530131.5	0.000266517	0.0109444	-0.81714	0.224129	6.52746	0.193657	0.0206749	0.054676	0.0303626	0.054676
PAPOLA	ENST00000392990.6	0.000268574	0.0110013	-0.675594	0.185406	6.37107	0.0928249	0.0194681	-0.0110529	0.0320948	0.0320948
ANK3	ENST00000622427.4	0.000269938	0.0110502	-1.57536	0.432486	5.50078	0.682453	0.0146879	0.265878	0.0504115	0.265878
NAP1L2	ENST00000373517.3	0.000272371	0.0111359	-1.11404	0.306034	4.71081	0.349667	0.0101915	0.130293	0.0923361	0.130293
HIVEP3	ENST00000372583.6	0.000275737	0.0112244	-5.24895	1.44317	2.16903	7.63614	2.03213	1.092	0.772015	1.092
PAM	ENST00000506260.1	0.000276382	0.0112437	-4.13299	1.13653	1.99455	4.14193	1.07739	-0.982908	0.860176	0.860176
SMIM30	ENST00000397764.8	0.000276628	0.0112467	-0.601965	0.165545	6.82688	0.130968	0.0025745	0.0385333	0.0278153	0.0385333
UBE2B	ENST00000499038.2	0.00027787	0.0112762	-1.32576	0.364711	4.3843	0.410368	0.0768791	-0.0287716	0.122642	0.122642
PNPLA8	ENST00000436062.5	0.000278852	0.0113021	-0.933173	0.256776	6.04682	0.23633	0.0620301	0.00450294	0.0368708	0.0368708
ATP11A	ENST00000375645.7	0.000280013	0.0113421	-0.764593	0.210451	7.38485	0.14071	0.0412057	0.000207207	0.0252286	0.0252286
PAM	ENST00000504691.1	0.000282306	0.0113887	-1.23067	0.338932	5.40075	0.501296	0.0332878	0.139024	0.0539686	0.139024
SYNDIG1	ENST00000376862.4	0.000285673	0.0115002	-0.875623	0.241354	5.34165	0.226635	0.00524521	0.0821327	0.0562656	0.0821327
PAG1	ENST00000220597.4	0.000286476	0.0115113	-1.31036	0.361257	6.20225	0.468915	0.0023691	0.193391	0.034356	0.193391
ARID1B	ENST00000414678.7	0.000291153	0.0116705	-0.65216	0.180003	6.74013	0.119717	0.0201405	0.00966421	0.0284612	0.0284612
SOD2	ENST00000538183.7	0.000290982	0.0116705	-0.668432	0.184487	6.73837	0.129205	0.00227721	0.0487757	0.028475	0.0487757
LAPTM5	ENST00000294507.4	0.00029112	0.0116705	-2.93025	0.808774	3.48928	4.05753	0.105043	0.876131	0.29463	0.876131
TNNI1	ENST00000555948.5	0.000292505	0.0117032	-1.07362	0.296428	7.30785	0.451175	0.00517623	0.126628	0.0254352	0.126628
PALLD	ENST00000507699.1	0.000292208	0.0117032	-4.61818	1.275	2.66082	8.8892	1.18578	1.25264	0.558365	1.25264
ERCC6L2	ENST00000479391.6	0.000297257	0.0118456	-0.793344	0.219296	5.16126	0.158986	0.00786761	0.0289823	0.0642688	0.0642688
CLASP2	ENST00000359576.9	0.000297636	0.0118506	-0.706073	0.195191	6.66785	0.131198	0.0280941	0.0154664	0.0290551	0.0290551
FRMPD1	ENST00000539465.5	0.000301956	0.0119476	-4.31335	1.19364	1.47414	4.43706	0.972674	0.291826	1.16448	1.16448
POPDC2	ENST00000463323.1	0.000303839	0.0120099	-0.979937	0.2713	4.82963	0.373122	0.0267745	0.0629966	0.083631	0.083631
RYR2	ENST00000609119.1	0.000304944	0.0120371	-1.38125	0.382506	6.36529	0.715101	0.0116732	0.207793	0.0321652	0.207793
DCAF5	ENST00000341516.9	0.000305446	0.0120371	-0.731869	0.202698	6.95671	0.182213	0.00517926	0.0564505	0.0269786	0.0564505
SGMS1	ENST00000361781.7	0.000306717	0.0120799	-0.873393	0.241967	6.78285	0.28137	0.00215606	0.0856658	0.0281343	0.0856658
TOPORS	ENST00000379858.1	0.000308212	0.012117	-0.58887	0.163199	6.42123	0.0853228	0.00844641	0.0149346	0.0315044	0.0315044
PPP2CA	ENST00000522385.1	0.000312863	0.0122629	-0.608553	0.168836	6.01134	0.124893	0.00524651	0.00595264	0.0375118	0.0375118
DISC1	ENST00000537876.5	0.000314555	0.0123218	-1.46925	0.407784	5.08954	0.801078	0.00962973	0.239801	0.0679071	0.239801
FASTKD1	ENST00000453929.6	0.000317798	0.0124192	-0.638543	0.177356	5.91886	0.143668	0.00786982	0.0372814	0.039313	0.039313
SGSM2	ENST00000574563.5	0.00031874	0.0124263	-4.51814	1.25519	1.54185	5.20533	1.24216	0.593141	1.12109	1.12109
SNX6	ENST00000555416.6	0.000321009	0.0124776	-4.70605	1.30806	1.93114	4.49479	1.67267	-1.43708	0.89386	0.89386
MORF4L1	ENST00000558830.5	0.000321239	0.0124791	-0.696583	0.193628	6.49922	0.135707	0.0198977	0.0363398	0.0306524	0.0363398
ZNF772	ENST00000427512.6	0.000322304	0.0125056	-0.651097	0.181027	6.09578	0.116848	0.0131274	0.0276194	0.0360288	0.0360288
RPS3	ENST00000528439.5	0.000322867	0.0125201	-3.19792	0.889242	3.1353	5.08886	0.792783	0.135274	0.393344	0.393344
AC241952.1	ENST00000647832.1	0.000323351	0.012524	-1.22744	0.341349	4.23484	0.422791	0.027612	0.147167	0.141808	0.147167
HIKESHI	ENST00000618164.1	0.000324257	0.0125517	-4.72224	1.31352	1.89892	5.32904	1.67668	-0.175139	0.911315	0.911315
TECRL	ENST00000507440.5	0.000326049	0.0126136	-1.39089	0.387039	4.71858	0.551462	0.0198413	0.204858	0.0917349	0.204858
SNRPN	ENST00000645002.1	0.000328683	0.0126987	-0.65153	0.181405	5.87802	0.118184	0.00918874	0.00996776	0.0401729	0.0401729
PANK1	ENST00000307534.8	0.000330838	0.0127536	-0.898954	0.250414	5.00053	0.229762	0.0113773	0.0826833	0.0728224	0.0826833
KLRG1	ENST00000356986.8	0.000337825	0.0129543	-3.39613	0.94747	3.00691	3.24698	0.493603	0.852946	0.43431	0.852946
AKIRIN1	ENST00000372984.8	0.00034224	0.0131083	-5.13645	1.43435	2.62655	7.66774	0.694398	2.39164	0.571731	2.39164
PDE4D	ENST00000636120.1	0.000343512	0.0131493	-1.04199	0.291054	5.88341	0.283859	0.0870115	-0.00733003	0.0400569	0.0400569
N4BP1	ENST00000564124.5	0.000344802	0.0131755	-1.07711	0.300945	5.70147	0.321126	0.0180016	0.117851	0.0444027	0.117851
TMEM38A	ENST00000187762.7	0.00034589	0.0131807	-0.620754	0.173479	6.05612	0.107106	0.00245023	0.0426924	0.0367072	0.0426924
GCNT2	ENST00000495262.6	0.000345944	0.0131807	-0.899109	0.251273	6.00563	0.274118	0.00573422	0.0889729	0.0376174	0.0889729
PRKDC	ENST00000314191.6	0.000345479	0.0131807	-0.649404	0.18147	8.79643	0.116986	0.000280534	0.0491167	0.0296512	0.0491167
GCNT2	ENST00000644083.1	0.000345944	0.0131807	-0.899109	0.251273	6.00563	0.274118	0.00573422	0.0889729	0.0376174	0.0889729
HLA-C	ENST00000376228.9	0.000346984	0.0131973	-4.0214	1.1241	1.52229	5.19507	0.401057	1.49435	1.1335	1.49435
CISD1	ENST00000489785.5	0.000348077	0.0132302	-0.844802	0.236202	5.19566	0.259108	0.0207272	0.0629598	0.06262	0.0629598
USP9YP14	ENST00000430663.2	0.000348253	0.0132302	-3.34249	0.934577	1.83405	2.56667	0.362978	0.0784917	0.947173	0.947173
ASPH	ENST00000522603.5	0.000348739	0.013236	-3.47834	0.972658	2.29327	3.02001	0.705847	0.245588	0.71325	0.71325
HEPH	ENST00000419594.5	0.000348811	0.013236	-1.10734	0.309655	6.79136	0.380183	0.0342186	0.10961	0.0280711	0.10961
SLMAP	ENST00000449503.6	0.000351522	0.0133031	-1.02839	0.28774	5.75477	0.42278	0.0604993	0.0636919	0.0430319	0.0636919
MRPS33	ENST00000324787.10	0.000351307	0.0133031	-0.855334	0.239308	4.93081	0.183987	0.00889895	0.0460995	0.0770036	0.0770036
ASTN2	ENST00000358637.4	0.000358405	0.0135139	-0.812511	0.227661	5.04948	0.179019	0.00768136	0.04984	0.0700627	0.0700627
STRN	ENST00000379213.3	0.000363294	0.0136504	-0.790626	0.221749	6.57361	0.184423	0.0023196	0.0714395	0.029909	0.0714395
ANK3	ENST00000503366.5	0.000365909	0.0137247	-1.65093	0.463285	6.29002	0.758082	0.0279926	0.293957	0.0331249	0.293957
ZNF639	ENST00000484866.5	0.000366093	0.0137247	-1.05065	0.294845	5.1035	0.31362	0.0632235	0.016865	0.0671773	0.0671773
H2BC21	ENST00000369155.3	0.00036922	0.0138182	-0.85352	0.239675	7.41132	0.277013	0.000599639	0.0855663	0.025168	0.0855663
YIPF4	ENST00000437765.1	0.000369451	0.0138189	-0.643816	0.180797	5.71199	0.119701	0.00490567	0.0361914	0.0441254	0.0441254
RAPGEF1	ENST00000419442.1	0.000370566	0.0138319	-1.04685	0.294042	5.10908	0.362196	0.00632408	0.123367	0.0668887	0.123367
PPFIA4	ENST00000367240.6	0.000373113	0.0138814	-0.934419	0.262595	6.81812	0.246425	0.00522228	0.0982118	0.0278774	0.0982118
EIF5A2	ENST00000295822.7	0.00037981	0.0140253	-0.783779	0.220551	5.11921	0.143916	0.00659586	0.0216133	0.0663683	0.0663683
ARFGEF2	ENST00000371917.5	0.000382862	0.014103	-0.588686	0.165751	7.99691	0.0980617	0.000313721	0.0408965	0.025175	0.0408965
ATP5MC1	ENST00000393366.7	0.000384826	0.0141435	-0.747338	0.210501	5.54642	0.181707	0.0175478	0.0407143	0.0489184	0.0489184
GPRIN3	ENST00000609438.2	0.00038569	0.0141673	-1.11793	0.314936	7.86933	0.362859	0.000575255	0.148202	0.0249542	0.148202
SYNE1	ENST00000490135.6	0.000390897	0.0143264	-1.66864	0.470548	5.14264	0.748248	0.266936	0.0150404	0.065187	0.065187
CCDC82	ENST00000538597.1	0.000391357	0.0143352	-4.29622	1.21162	1.62297	5.10891	1.13138	0.981431	1.07066	1.07066
RAB3IP	ENST00000550536.5	0.000404679	0.0147243	-0.93872	0.265399	7.14981	0.30417	0.00107518	0.10458	0.026005	0.10458
COG5	ENST00000640820.1	0.000407884	0.0148162	-0.883511	0.249937	6.10617	0.216639	0.0334601	0.0602429	0.0358563	0.0602429
ZNF181	ENST00000392232.7	0.000408782	0.0148291	-1.06552	0.301474	5.09329	0.362367	0.0346343	0.101696	0.0677103	0.101696
CACNA1C	ENST00000480911.5	0.000414138	0.014972	-3.40496	0.964329	2.29261	3.22051	0.120548	1.27435	0.713554	1.27435
CACNA1C	ENST00000646676.1	0.000414138	0.014972	-3.40496	0.964329	2.29261	3.22051	0.120548	1.27435	0.713554	1.27435
PTPRK	ENST00000368210.7	0.000416052	0.015013	-0.890105	0.252177	5.67538	0.2367	0.0420586	0.0533311	0.0451057	0.0533311
PTPRK	ENST00000625760.2	0.000416052	0.015013	-0.890105	0.252177	5.67538	0.2367	0.0420586	0.0533311	0.0451057	0.0533311
FLOT1	ENST00000437093.5	0.000420776	0.0151588	-0.934664	0.265025	5.55889	0.190865	0.0568336	-0.0224266	0.048524	0.048524
ADD1	ENST00000355842.7	0.000421246	0.0151669	-0.93633	0.26552	6.14842	0.267373	0.0113056	0.0944456	0.0351757	0.0944456
RBM33	ENST00000287912.7	0.000423216	0.0152128	-1.27361	0.36129	4.62926	0.450988	0.0290776	0.166719	0.0989413	0.166719
KCNH2	ENST00000532957.5	0.000423677	0.0152177	-0.760596	0.215779	6.76459	0.283863	0.027667	0.0421742	0.0282718	0.0421742
HUWE1	ENST00000262854.11	0.000426445	0.015272	-1.01543	0.288217	8.18374	0.336331	0.0452349	0.0793686	0.0257261	0.0793686
CTNNA3	ENST00000433211.7	0.00042923	0.0153615	-1.27443	0.361907	7.60836	0.543013	0.000634936	0.19583	0.0248839	0.19583
MLIP	ENST00000514433.1	0.000432668	0.0154591	-1.34821	0.38309	4.17648	0.413602	0.0697133	-0.000837734	0.150424	0.150424
NPY6R	ENST00000510937.1	0.000433419	0.0154643	-1.53825	0.437146	5.99663	0.710921	0.00355525	0.28309	0.0377855	0.28309
AFAP1L1	ENST00000515000.1	0.000433178	0.0154643	-0.824878	0.234407	5.73402	0.191116	0.0113553	0.0710646	0.0435554	0.0710646
TRDN	ENST00000361029.8	0.000439796	0.0156321	-1.21124	0.344595	4.68451	0.604879	0.0150724	0.163046	0.094408	0.163046
PPP4R3A	ENST00000554943.5	0.000448228	0.0158593	-0.708142	0.201754	6.46955	0.164419	0.0130906	0.0479664	0.0309675	0.0479664
ZNF415	ENST00000601493.5	0.000450685	0.015929	-4.29921	1.22538	2.14015	5.00699	1.46618	-0.813301	0.786158	0.786158
ASB2	ENST00000555019.5	0.00045236	0.0159451	-0.874987	0.249462	6.8695	0.405907	0.00216861	0.0911787	0.0275238	0.0911787
ASB2	ENST00000612647.3	0.00045236	0.0159451	-0.874987	0.249462	6.8695	0.405907	0.00216861	0.0911787	0.0275238	0.0911787
ABLIM1	ENST00000392955.7	0.00045385	0.0159804	-0.805526	0.229716	9.03817	0.193084	0.00144242	0.0777119	0.0322608	0.0777119
ADAP1	ENST00000478000.5	0.000455661	0.0160098	-2.01646	0.575218	4.07651	1.47826	0.149569	0.346744	0.166669	0.346744
TNNT2	ENST00000367318.9	0.000457393	0.0160534	-1.02258	0.291787	9.40036	0.420881	0.00116194	0.126548	0.0376187	0.126548
CORO6	ENST00000388767.7	0.000458191	0.0160728	-0.954146	0.272296	6.32216	0.29592	0.0077045	0.103513	0.0327048	0.103513
WDPCP	ENST00000409562.7	0.000459669	0.016116	-0.692372	0.197639	5.50248	0.119646	0.00823732	0.0276511	0.0503543	0.0503543
MYO18A	ENST00000533420.3	0.000460229	0.0161184	-1.64754	0.470335	5.4493	0.792452	0.00570628	0.326117	0.0521921	0.326117
SCAF11	ENST00000549162.5	0.00046331	0.0161685	-0.767087	0.219098	6.93677	0.178039	0.00502235	0.0669833	0.0270973	0.0669833
MSRB3	ENST00000614640.4	0.000463178	0.0161685	-6.73807	1.92451	3.73435	12.6957	1.49013	4.06546	0.23569	4.06546
MARK3	ENST00000553942.5	0.000465669	0.0161962	-0.826709	0.236218	5.86968	0.163026	0.0433451	-0.00848245	0.0403536	0.0403536
CRYAB	ENST00000526180.6	0.000466977	0.0162245	-0.865701	0.247413	5.50814	0.22571	0.038577	0.0532425	0.0501654	0.0532425
UBR4	ENST00000375254.8	0.000475528	0.0164604	-0.841917	0.240949	9.1689	0.198484	0.000197928	0.0868865	0.0339766	0.0868865
RBM24	ENST00000509686.5	0.000476787	0.0164836	-1.13599	0.325176	6.551	0.449242	0.00679845	0.15181	0.0301281	0.15181
PTP4A2	ENST00000457805.6	0.000479369	0.0165525	-0.760314	0.217728	5.5293	0.133926	0.0216392	0.0116281	0.0494693	0.0494693
MLLT3	ENST00000380338.9	0.000480616	0.0165752	-0.792002	0.226848	5.32757	0.178706	0.011278	0.065912	0.0568352	0.065912
GOPC	ENST00000368498.7	0.000482645	0.0166219	-1.03533	0.296638	6.04156	0.291603	0.0950266	0.0222679	0.0369642	0.0369642
KIF26B	ENST00000407071.7	0.000491514	0.0168622	-0.837	0.240149	9.0305	0.221636	0.00122824	0.0852789	0.0321671	0.0852789
RNF2	ENST00000367510.8	0.000492931	0.0168931	-0.655515	0.188119	5.72124	0.126484	0.00919912	0.0402085	0.0438842	0.0438842
AKAP13	ENST00000560676.5	0.00049426	0.0169298	-2.13438	0.612651	3.84533	1.37621	0.188268	0.374744	0.211205	0.374744
VIRMA	ENST00000421249.2	0.000494876	0.016942	-0.91566	0.262855	5.35234	0.211778	0.0478003	0.0119405	0.055839	0.055839
DYNC1LI1	ENST00000273130.9	0.000499904	0.0170873	-0.587613	0.168815	7.44233	0.114988	0.000814671	0.0419332	0.0251039	0.0419332
TMEM67	ENST00000519845.5	0.000502923	0.0171815	-1.65262	0.475001	4.46627	1.18632	0.116951	0.221488	0.113858	0.221488
ANK3	ENST00000373820.5	0.000503342	0.0171822	-1.231	0.35384	5.92312	0.474389	0.0163379	0.171466	0.0392258	0.171466
DNM2	ENST00000408974.8	0.000510908	0.0173818	-1.34248	0.386328	5.9891	0.511588	0.170864	0.05301	0.0379272	0.05301
RIC8B	ENST00000355478.6	0.000514324	0.0174617	-4.54573	1.30881	1.72091	5.32697	1.55745	0.319453	1.01202	1.01202
QKI	ENST00000541696.1	0.000526228	0.0177922	-0.771165	0.222428	6.06805	0.224605	0.00804971	0.0661614	0.0364997	0.0661614
SPHKAP	ENST00000344657.5	0.000528329	0.0178538	-1.61628	0.466329	7.071	0.899974	0.00600121	0.320194	0.0263645	0.320194
B2M	ENST00000633512.1	0.000532124	0.0179542	-3.90349	1.12686	1.60405	5.57259	0.386578	1.51814	1.08227	1.51814
ERBIN	ENST00000508515.1	0.000535085	0.0180356	-0.672915	0.194341	5.96725	0.135025	0.0163187	0.0403338	0.0383463	0.0403338
PIK3R1	ENST00000521381.6	0.000535545	0.0180418	-0.719997	0.207952	7.72347	0.176363	0.000757342	0.0641089	0.0248522	0.0641089
SLC38A1	ENST00000546893.5	0.000539014	0.0181036	-0.936524	0.270626	5.80716	0.248922	0.0121049	0.097753	0.0417659	0.097753
NAP1L1	ENST00000552342.5	0.000540591	0.0181278	-0.903662	0.26119	5.61058	0.195201	0.0553811	-0.0248346	0.0469489	0.0469489
RPL23AP82	ENST00000480246.1	0.000543542	0.0181716	-0.703976	0.20356	5.28904	0.133056	0.00371471	0.0209417	0.0584402	0.0584402
RPL23AP82	ENST00000635902.1	0.000543542	0.0181716	-0.703976	0.20356	5.28904	0.133056	0.00371471	0.0209417	0.0584402	0.0584402
SMC4	ENST00000497984.5	0.00054671	0.0182117	-4.23751	1.22586	1.66536	4.34499	1.20912	0.0453473	1.04498	1.04498
GPR174	ENST00000645147.1	0.000550505	0.0183009	-2.56715	0.743046	2.42906	1.49471	0.175247	-0.116289	0.652928	0.652928
MTMR8	ENST00000374852.4	0.000551179	0.018314	-1.17811	0.34103	4.56133	0.469484	0.0133579	0.161095	0.104867	0.161095
NBPF19	ENST00000426482.3	0.000551547	0.0183169	-0.719312	0.208232	5.76916	0.146162	0.0170061	0.0480344	0.0426763	0.0480344
NA	ENST00000647359.1	0.000554826	0.0183885	-4.44101	1.28621	3.63464	6.18694	1.38199	1.09952	0.259046	1.09952
KIFAP3	ENST00000361580.7	0.000562769	0.0185464	-0.786321	0.227988	8.31872	0.210104	0.000794035	0.0771741	0.0263	0.0771741
DDX51	ENST00000462829.2	0.000564371	0.0185781	-3.97023	1.1514	2.51984	4.12628	1.37388	-0.00516913	0.614693	0.614693
TECRL	ENST00000509536.1	0.000565437	0.0185989	-1.01012	0.292986	4.80457	0.290574	0.0287124	0.100049	0.0853809	0.100049
NAA30	ENST00000298406.6	0.000568909	0.0186756	-1.12167	0.325497	5.1078	0.41899	0.0718679	0.0870545	0.0669546	0.0870545
GTF2A2	ENST00000396063.5	0.000569691	0.0186886	-0.591268	0.171598	6.05932	0.0822711	0.00751769	0.00403939	0.0366513	0.0366513
SSPN	ENST00000422622.3	0.000574023	0.0187775	-1.02412	0.297397	5.78895	0.309159	0.00433401	0.128334	0.042197	0.128334
MACF1	ENST00000524432.5	0.000591704	0.0192214	-2.90291	0.845001	3.64135	2.598	0.508775	0.562266	0.257439	0.562266
METTL5	ENST00000392640.6	0.000593656	0.0192562	-0.910689	0.265159	5.38736	0.322641	0.0509882	-0.00583997	0.0544761	0.0544761
KLHL3	ENST00000309755.9	0.000594899	0.0192774	-0.828817	0.241361	6.50346	0.251692	0.00358302	0.0837998	0.0306083	0.0837998
FAM13C	ENST00000618804.4	0.000598254	0.0193382	-4.35586	1.26904	3.24283	5.59161	1.48019	0.935507	0.36116	0.935507
LINC00888	ENST00000471496.5	0.000599305	0.0193626	-0.794669	0.231552	5.09067	0.162668	0.0125767	0.0136807	0.0678475	0.0678475
RBPMS	ENST00000523115.5	0.000601547	0.0194255	-4.50249	1.31233	1.90287	6.81421	1.16489	1.41842	0.909159	1.41842
KCNAB1	ENST00000618897.4	0.000609009	0.0196444	-1.39488	0.40696	3.96315	0.47167	0.0610944	0.0794854	0.18733	0.18733
SCRN3	ENST00000272732.10	0.000627933	0.020096	-0.619473	0.181172	5.78419	0.129259	0.00692346	0.0298118	0.0423114	0.0423114
ASPH	ENST00000517847.6	0.000627315	0.020096	-1.09959	0.321562	5.78802	0.346279	0.0623659	0.0927374	0.0422194	0.0927374
CDH8	ENST00000577390.6	0.000628778	0.0201065	-1.30624	0.382066	4.05765	0.600272	0.0490194	0.10275	0.169943	0.169943
MDM4	ENST00000621032.4	0.000632515	0.020173	-3.45516	1.01109	3.64474	3.62487	1.06222	0.471227	0.25663	0.471227
FAM81A	ENST00000288228.10	0.000632233	0.020173	-1.69921	0.497225	3.40808	0.72856	0.0553981	0.141397	0.31545	0.31545
ZFAND6	ENST00000559835.5	0.000633016	0.020173	-0.708845	0.207443	5.67044	0.135673	0.0193075	-0.00852567	0.0452414	0.0452414
MPDZ	ENST00000319217.11	0.000634095	0.0201975	-1.02991	0.301445	7.29573	0.316615	0.0153752	0.120928	0.0254719	0.120928
ZNF302	ENST00000505365.2	0.000636135	0.0202527	-1.0577	0.309656	5.499	0.402288	0.0933587	0.0399293	0.0504715	0.0504715
XPR1	ENST00000367590.8	0.000641146	0.0203898	-0.691925	0.202698	8.35379	0.16126	0.000454146	0.0611754	0.0264742	0.0611754
POPDC2	ENST00000468916.1	0.000641377	0.0203898	-0.800779	0.234593	5.11165	0.225922	0.0157945	0.00878614	0.0667561	0.0667561
NA	ENST00000457986.5	0.000647605	0.020518	-0.7607	0.223023	5.68399	0.192586	0.0067103	0.0678988	0.0448715	0.0678988
TATDN3	ENST00000366974.9	0.000649399	0.020555	-4.98684	1.46237	2.20235	7.31351	1.34446	1.86334	0.755914	1.86334
ABHD5	ENST00000644371.1	0.000656345	0.0207347	-0.617608	0.181266	5.76975	0.0876001	0.00662405	0.00944037	0.0426619	0.0426619
USP2	ENST00000525735.1	0.000674282	0.0211991	-0.919815	0.270547	4.85494	0.258026	0.0278854	0.0689365	0.0819085	0.0819085
KTN1	ENST00000554507.5	0.000678526	0.0213223	-0.882397	0.259673	6.61167	0.295762	0.022058	0.0790868	0.0295528	0.0790868
ERBB2	ENST00000580074.1	0.000682046	0.021362	-4.45198	1.31068	3.32545	5.7329	1.26546	1.31136	0.337744	1.31136
NA	ENST00000558084.5	0.000682434	0.021363	-0.756958	0.222861	6.35257	0.167073	0.00795246	0.0665483	0.0323214	0.0665483
TBX20	ENST00000492961.1	0.000688513	0.0215224	-1.27255	0.374929	5.59304	0.464956	0.0388675	0.17199	0.0474728	0.17199
MEF2C	ENST00000510942.5	0.000692817	0.0216363	-1.04558	0.308211	5.39675	0.318679	0.0482889	0.0942024	0.0541195	0.0942024
WEE1	ENST00000530175.5	0.000696163	0.0217098	-0.804648	0.237283	5.7649	0.229982	0.0117156	0.0727394	0.0427809	0.0727394
FGF12	ENST00000440901.4	0.00070007	0.021801	-1.49049	0.43973	4.43286	1.10222	0.0626403	0.227403	0.117293	0.227403
ZNF436	ENST00000635400.2	0.000700421	0.021801	-0.820254	0.242005	6.84266	0.209727	0.00178274	0.0860666	0.0277055	0.0860666
ZNF436	ENST00000314011.9	0.000700421	0.021801	-0.820254	0.242005	6.84266	0.209727	0.00178274	0.0860666	0.0277055	0.0860666
LMOD1	ENST00000367288.5	0.000703112	0.021864	-0.667793	0.197084	7.9251	0.15177	0.000371007	0.0578924	0.0250354	0.0578924
RETREG1	ENST00000399793.6	0.000709953	0.0220035	-1.49554	0.441722	4.96535	0.950423	0.0983958	0.194282	0.074894	0.194282
MFSD11	ENST00000590393.1	0.000711711	0.0220475	-3.40859	1.00696	2.61446	3.63969	0.597672	0.923283	0.576493	0.923283
NRP1	ENST00000418675.5	0.000714899	0.0221061	-1.00896	0.298173	4.40027	0.286451	0.0125241	-0.00374628	0.120836	0.120836
ATRX	ENST00000493470.2	0.000715291	0.0221061	-0.773342	0.228553	5.04559	0.178096	0.00807789	0.0215747	0.0702766	0.0702766
HECTD1	ENST00000553700.5	0.000717857	0.0221645	-0.765631	0.226339	7.57046	0.167553	0.013823	0.0630213	0.0249159	0.0630213
NACA	ENST00000549259.5	0.000725895	0.0223389	-0.713733	0.211188	6.80227	0.258861	0.0389093	0.00828682	0.0279913	0.0279913
RPL8	ENST00000526668.5	0.000733723	0.0225058	-0.874202	0.258896	6.98767	0.252969	0.0737392	0.00508522	0.0268011	0.0268011
HIVEP2	ENST00000367603.8	0.00073894	0.0226002	-0.77957	0.231004	7.03067	0.176712	0.0353318	0.0447124	0.0265684	0.0447124
CDC37L1	ENST00000381854.4	0.000739431	0.0226002	-0.625807	0.18545	5.63728	0.0972746	0.0054153	0.0132796	0.0461724	0.0461724
C2CD3	ENST00000537285.1	0.000742648	0.0226522	-4.04693	1.19968	1.59656	3.38711	1.07197	-0.862876	1.08689	1.08689
B2M	ENST00000561424.5	0.000744673	0.0226822	-1.28617	0.381362	7.29418	0.601396	0.00114597	0.21701	0.0254767	0.21701
B2M	ENST00000631728.1	0.000744673	0.0226822	-1.28617	0.381362	7.29418	0.601396	0.00114597	0.21701	0.0254767	0.21701
NA	ENST00000646637.1	0.000753384	0.0228307	-0.889025	0.263854	4.74785	0.165326	0.014919	0.00791912	0.0895096	0.0895096
TCF12	ENST00000333725.9	0.000762608	0.0230568	-0.672064	0.199661	6.53354	0.116224	0.0294955	0.00935917	0.0303014	0.0303014
SPSB4	ENST00000508126.1	0.000776835	0.0233575	-1.16885	0.347776	5.05859	0.495238	0.0853503	0.0960715	0.0695643	0.0960715
SEC11A	ENST00000560266.5	0.000783322	0.0234733	-1.36605	0.406729	4.93059	0.764623	0.0856105	0.162532	0.0770174	0.162532
OCIAD1	ENST00000513391.2	0.000783554	0.0234733	-4.22839	1.259	4.58503	5.1501	1.05654	1.32107	0.102754	1.32107
RBM24	ENST00000510826.1	0.000783545	0.0234733	-1.22097	0.363541	4.20809	0.542556	0.0525661	0.123869	0.145678	0.145678
C10orf71	ENST00000374144.8	0.00078433	0.0234858	-1.06925	0.318392	6.10724	0.37592	0.00260682	0.149454	0.0358387	0.149454
INO80D	ENST00000403263.6	0.000788401	0.0235538	-0.60478	0.180164	5.88152	0.112097	0.00160034	0.0470881	0.0400975	0.0470881
INO80D	ENST00000636453.2	0.000788401	0.0235538	-0.60478	0.180164	5.88152	0.112097	0.00160034	0.0470881	0.0400975	0.0470881
ZC2HC1A	ENST00000263849.9	0.000790845	0.023616	-0.586021	0.17462	5.81035	0.0916891	0.00404695	0.0109913	0.0416912	0.0416912
SVIL	ENST00000464984.1	0.000795416	0.0237093	-1.21018	0.360777	4.1662	0.570482	0.0296993	0.165541	0.152007	0.165541
MYBPC3	ENST00000545968.5	0.000796806	0.0237349	-0.874756	0.260817	9.86472	0.304131	7.39903e-05	0.101964	0.0478048	0.101964
GTF2H1	ENST00000418116.6	0.000798558	0.0237489	-0.677193	0.201949	5.77844	0.104266	0.0187245	0.00564189	0.0424503	0.0424503
RPS24	ENST00000464716.6	0.000799521	0.0237667	-1.05548	0.314791	6.61838	0.430251	0.012737	0.135903	0.0294916	0.135903
PPIL3	ENST00000415562.5	0.00080314	0.023831	-4.4062	1.31461	2.21553	4.92359	1.8427	-1.62509	0.74961	0.74961
PSME3IP1	ENST00000562324.5	0.00080567	0.0238736	-1.92384	0.574136	4.36623	1.06719	0.340343	0.154105	0.124741	0.154105
PPHLN1	ENST00000449194.6	0.000811364	0.0239833	-0.761475	0.227381	6.14902	0.191158	0.0147166	0.0628369	0.0351664	0.0628369
NSMF	ENST00000371472.6	0.000810962	0.0239833	-4.48711	1.33983	3.8695	6.84224	0.985207	1.7075	0.206117	1.7075
HLTF	ENST00000465259.5	0.000815059	0.0240647	-0.750354	0.224145	6.50339	0.164645	0.0447523	0.00247053	0.0306091	0.0306091
SLC8A1	ENST00000403092.5	0.00081545	0.0240653	-0.923215	0.275793	8.17919	0.291032	0.00779444	0.106298	0.0257094	0.106298
CHRM2	ENST00000445907.6	0.000815893	0.0240676	-0.872717	0.260719	7.52979	0.237148	0.000842049	0.10112	0.0249622	0.10112
NDUFA10	ENST00000252711.7	0.000819612	0.0241338	-0.666202	0.199099	5.35211	0.11454	0.0036127	0.0313286	0.0558479	0.0558479
NA	ENST00000630647.3	0.000819612	0.0241338	-0.666202	0.199099	5.35211	0.11454	0.0036127	0.0313286	0.0558479	0.0558479
RALGAPA1	ENST00000553892.2	0.000821281	0.0241637	-1.14561	0.342432	5.3067	0.390198	0.0706292	0.105261	0.057696	0.105261
SERTM2	ENST00000569275.1	0.000821738	0.0241637	-1.01665	0.303897	4.36545	0.258422	0.0136974	0.0713853	0.124833	0.124833
PPP2R5C	ENST00000556260.6	0.000826842	0.024292	-0.645093	0.192931	5.46983	0.144273	0.00436409	0.0375589	0.0514694	0.0514694
SORBS2	ENST00000464975.5	0.000829625	0.0243519	-1.64087	0.490878	4.65252	0.947249	0.084984	0.276458	0.0970025	0.276458
SCMH1	ENST00000372596.5	0.000845042	0.0247268	-0.772664	0.231503	6.15917	0.169653	0.0453823	-0.0122458	0.0350079	0.0350079
ARHGAP5	ENST00000556611.5	0.000850015	0.024839	-0.673831	0.201989	6.41019	0.128697	0.0295681	0.0221284	0.0316315	0.0316315
KRBA2	ENST00000649935.1	0.000850622	0.0248457	-1.34892	0.404379	4.05542	0.459203	0.0749505	-0.00127278	0.170333	0.170333
SLMAP	ENST00000417128.5	0.000854209	0.0249282	-1.68235	0.504513	6.10299	1.18579	0.129016	0.252784	0.0359089	0.252784
CACNB2	ENST00000324631.12	0.00086256	0.0251271	-1.26736	0.380373	5.16537	0.577179	0.0303152	0.186711	0.0640688	0.186711
PPP1R12B	ENST00000391959.5	0.000863789	0.0251517	-1.24129	0.372593	7.49484	0.505944	0.052177	0.156061	0.0250119	0.156061
PDE4DIP	ENST00000585156.5	0.000865202	0.0251816	-0.953404	0.286217	5.87641	0.32524	0.0502693	0.0726114	0.0402075	0.0726114
PLEKHO1	ENST00000479194.5	0.000867742	0.0252354	-1.13544	0.340949	4.83302	0.315282	0.0909718	-0.0170821	0.0833975	0.0833975
SORBS2	ENST00000451701.5	0.000870481	0.0252567	-0.96038	0.288459	5.84369	0.360338	0.00323269	0.12158	0.0409281	0.12158
ME2	ENST00000321341.11	0.000870945	0.0252589	-0.904548	0.271701	4.69155	0.181935	0.0168842	-0.00120663	0.0938479	0.0938479
VPS54	ENST00000409558.8	0.000877884	0.0254122	-0.611213	0.183713	6.33756	0.0903646	0.0181169	0.00803173	0.0325089	0.0325089
MCMDC2	ENST00000422365.7	0.000878533	0.0254122	-0.907793	0.272874	4.6064	0.246223	0.0107996	0.0472377	0.100891	0.100891
HERC2	ENST00000261609.12	0.000881195	0.0254435	-0.788066	0.236945	7.67847	0.180351	0.00104959	0.0831649	0.0248529	0.0831649
AP4E1	ENST00000261842.10	0.000885489	0.0255112	-0.633232	0.190469	6.64627	0.141494	0.0156366	0.0387813	0.0292424	0.0387813
ATP13A3	ENST00000485194.1	0.000885421	0.0255112	-1.99059	0.598743	5.1726	1.22451	0.277484	0.260255	0.0637185	0.260255
TTN	ENST00000436599.1	0.000891407	0.0256253	-2.66916	0.803303	2.35069	1.73331	0.280679	0.197018	0.687266	0.687266
FGFR1	ENST00000533668.5	0.000891306	0.0256253	-3.99936	1.20363	2.0033	4.68722	1.20337	0.969703	0.8556	0.969703
KIF13A	ENST00000378826.6	0.000894161	0.0256837	-1.158	0.348599	7.3504	0.396448	0.0177232	0.164558	0.0253154	0.164558
NPPA	ENST00000376480.7	0.000898713	0.0257449	-1.53014	0.460824	8.89661	1.33813	0.000216294	0.318322	0.0306493	0.318322
ZNF441	ENST00000357901.5	0.000899414	0.0257537	-1.06122	0.319623	4.34356	0.53614	0.0257794	0.10339	0.127459	0.127459
PITPNA	ENST00000575895.5	0.000901447	0.0257573	-1.14389	0.344585	5.09722	0.381721	0.0952067	0.0829013	0.0675044	0.0829013
AC016582.3	ENST00000443870.3	0.000901088	0.0257573	-0.85998	0.259052	4.71444	0.191964	0.00860717	0.0395099	0.0920548	0.0920548
GTF2IRD2	ENST00000451013.6	0.000906841	0.0258871	-0.761633	0.22955	5.39263	0.181787	0.0198427	0.0591971	0.0542754	0.0591971
KLRK1	ENST00000240618.11	0.000909535	0.025911	-3.13435	0.944905	2.92849	4.09193	0.420555	0.918712	0.460689	0.918712
ANAPC5	ENST00000541652.5	0.000908784	0.025911	-3.72797	1.12378	3.54099	3.83278	1.6125	0.0220023	0.281828	0.281828
NA	ENST00000647132.1	0.00091747	0.0260429	-0.766322	0.23119	5.12612	0.187267	0.00962388	0.0705494	0.0660171	0.0705494
ANAPC16	ENST00000470481.2	0.000919168	0.0260684	-0.717166	0.216394	5.62867	0.163821	0.0238196	0.000794914	0.04642	0.04642
MBNL1	ENST00000324210.9	0.000924873	0.0262076	-1.16554	0.351868	6.11359	0.424523	0.0721075	0.113609	0.0357343	0.113609
GOLGA4	ENST00000356847.8	0.000929947	0.0263014	-0.611661	0.184741	6.83382	0.124349	0.0234273	0.0209482	0.0277667	0.0277667
SLC38A1	ENST00000552197.5	0.000930894	0.0263098	-0.955899	0.288737	4.59578	0.212071	0.0232416	0.0298585	0.101812	0.101812
PDHA1	ENST00000379806.9	0.000934195	0.0263608	-4.29736	1.29844	1.74474	5.50938	1.53082	0.947265	0.998113	0.998113
RASGRP3	ENST00000403687.8	0.000942978	0.0265254	-1.34729	0.407406	5.33991	0.597048	0.192634	0.0204039	0.0563355	0.0563355
PRDX4	ENST00000439422.1	0.000945978	0.0265755	-4.30955	1.30351	1.34096	4.48107	1.29534	-0.00732567	1.25335	1.25335
THUMPD3	ENST00000452837.7	0.000951472	0.0267004	-0.668654	0.202347	5.99584	0.152746	0.0236161	0.0318211	0.0378002	0.0378002
HECTD2	ENST00000298068.9	0.000952238	0.0267055	-0.797081	0.241228	6.36563	0.210667	0.00328309	0.084003	0.032161	0.084003
SMYD1	ENST00000419482.7	0.000956378	0.0267872	-0.997899	0.302114	9.90569	0.416245	6.78443e-05	0.136842	0.0489268	0.136842
PPP1R9A	ENST00000424654.5	0.000964773	0.0269186	-4.35336	1.31896	1.71067	5.49183	1.59145	0.838281	1.01804	1.01804
MROH7	ENST00000371287.3	0.000968058	0.0269988	-1.57149	0.476259	3.4958	0.695511	0.0472297	0.148083	0.293004	0.293004
TOM1L2	ENST00000535933.5	0.000972289	0.0270779	-0.771593	0.233928	6.0059	0.194561	0.00846347	0.0736198	0.0376124	0.0736198
CACYBP	ENST00000405362.1	0.000974028	0.027096	-0.76011	0.230482	5.36674	0.163979	0.0244106	0.0189802	0.055272	0.055272
MLIP	ENST00000502396.6	0.000978935	0.0271633	-1.16623	0.353776	6.89253	0.494054	0.00504773	0.182688	0.0273732	0.182688
TMEM138	ENST00000381787.2	0.000980167	0.0271744	-3.61198	1.09581	2.05304	3.17396	0.971318	-0.00124459	0.829894	0.829894
LRATD2	ENST00000517458.1	0.000985255	0.0272923	-1.09171	0.331354	4.52676	0.565896	0.0465245	0.118169	0.108038	0.118169
SLCO3A1	ENST00000318445.11	0.000990568	0.0273688	-0.834815	0.253497	6.12763	0.348479	0.00518825	0.0912031	0.0355064	0.0912031
ADPRHL1	ENST00000612156.2	0.000992235	0.0273814	-1.19308	0.362338	5.66839	0.471818	0.00421454	0.192719	0.045298	0.192719
NDUFA5	ENST00000466896.5	0.000996693	0.0274929	-0.633579	0.192492	6.09425	0.130775	0.00422676	0.0513529	0.0360544	0.0513529
SCP2	ENST00000408941.7	0.00100497	0.0276481	-1.05835	0.321771	5.62662	0.381492	0.0256268	0.129678	0.0464795	0.129678
COBL	ENST00000441453.5	0.00101621	0.0278152	-1.38438	0.421296	3.83442	0.510949	0.0527048	0.0911406	0.21353	0.21353
IMPA1	ENST00000311489.8	0.00102093	0.027926	-0.865066	0.263363	4.92092	0.185043	0.0264183	0.0056538	0.0776214	0.0776214
EXOC5	ENST00000555148.5	0.00103074	0.0281221	-0.629151	0.191698	6.02401	0.117468	0.0110068	0.0441152	0.0372798	0.0441152
PPP2R3A	ENST00000334546.6	0.00103583	0.0281695	-1.09139	0.332678	5.89687	0.367338	0.0104974	0.155515	0.0397709	0.155515
PRXL2C	ENST00000411939.5	0.00103755	0.0282039	-1.69849	0.517811	3.7175	0.820518	0.162637	0.0511946	0.239556	0.239556
PRICKLE1	ENST00000445766.7	0.00104529	0.02834	-1.48918	0.454288	7.24457	0.640223	0.283927	0.0121096	0.0256396	0.0256396
PSMD12	ENST00000357146.4	0.00104718	0.0283597	-0.961579	0.293385	5.06704	0.199057	0.0600053	-0.0404886	0.0691068	0.0691068
ZFYVE1	ENST00000553891.5	0.00105566	0.0285413	-4.24828	1.29708	2.86572	5.50917	2.0411	-1.0142	0.482543	0.482543
NCOR2	ENST00000356219.7	0.00105798	0.0285813	-4.70564	1.437	3.04186	7.13936	2.22046	0.876981	0.422886	0.876981
LDB3	ENST00000623007.3	0.00105958	0.0286008	-0.878794	0.268399	7.51718	0.329043	0.0012387	0.106818	0.0249791	0.106818
CPVL	ENST00000396276.7	0.00106659	0.0287071	-1.14817	0.35087	7.21555	0.461389	0.0025585	0.182106	0.0257438	0.182106
SPECC1L	ENST00000541492.1	0.00106952	0.0287741	-3.12038	0.953787	4.72363	2.03266	1.27322	-1.14435	0.0913457	0.0913457
MAN1B1	ENST00000544448.5	0.00107451	0.028861	-4.12145	1.26028	2.92434	4.86615	1.92036	0.198241	0.462115	0.462115
MORC4	ENST00000604604.1	0.00107888	0.0289427	-0.684662	0.209434	5.82519	0.140315	0.0057213	0.0600726	0.0413477	0.0600726
MTRNR2L12	ENST00000600213.3	0.00107978	0.0289549	-0.961975	0.294284	11.3544	0.290552	1.22839e-05	0.013711	0.129892	0.129892
EZH1	ENST00000415827.6	0.0010895	0.0291578	-4.671	1.43004	1.81295	5.92204	2.1085	0.245677	0.959037	0.959037
AK2	ENST00000550338.5	0.00108957	0.0291578	-0.777201	0.237944	5.17774	0.174436	0.0214547	0.0600807	0.0634715	0.0634715
RCSD1	ENST00000367854.8	0.00110798	0.0295298	-1.05983	0.324946	7.2867	0.445385	0.00176139	0.156624	0.0255	0.156624
MTND2P28	ENST00000457540.1	0.00111194	0.0296082	-0.718265	0.220289	7.48749	0.31321	0.00077878	0.0720123	0.0250236	0.0720123
PARP15	ENST00000483793.5	0.00111502	0.029669	-1.33569	0.409749	3.84858	0.441117	0.0413271	0.0565992	0.210514	0.210514
ADAL	ENST00000428046.7	0.00111603	0.0296717	-0.644475	0.197721	5.65458	0.121696	0.0129585	0.0271092	0.045682	0.045682
WDR72	ENST00000614174.4	0.00112169	0.029774	-0.786171	0.241299	5.60349	0.181391	0.0361572	0.0511805	0.0471592	0.0511805
IDH3A	ENST00000559881.5	0.00112468	0.0298412	-1.21854	0.374092	4.42225	0.406894	0.0914905	0.0169314	0.118426	0.118426
MGAT5	ENST00000488365.1	0.001126	0.029864	-2.51561	0.772371	2.33611	1.80235	0.201038	0.567815	0.693797	0.693797
CACNA1C	ENST00000543114.1	0.00115224	0.030449	-1.22996	0.378397	3.89409	0.486265	0.0137366	0.149045	0.20104	0.20104
CACNA1C	ENST00000642774.1	0.00115224	0.030449	-1.22996	0.378397	3.89409	0.486265	0.0137366	0.149045	0.20104	0.20104
MYH14	ENST00000376970.6	0.00115432	0.0304671	-4.88334	1.5026	2.13938	7.27737	2.49719	0.889512	0.78654	0.889512
TCP1	ENST00000420894.6	0.00116186	0.0306289	-1.20701	0.371606	6.51876	0.439086	0.127907	0.0792297	0.0304508	0.0792297
EPRS1	ENST00000464052.5	0.00116529	0.0306576	-4.28854	1.32067	1.90533	6.84372	1.23824	1.37803	0.907825	1.37803
SH3BGR	ENST00000333634.8	0.00117152	0.0307844	-0.901322	0.277695	7.03182	0.363753	0.00243236	0.11324	0.0265624	0.11324
ACADM	ENST00000532509.5	0.00117546	0.0308632	-1.13496	0.349782	4.78269	0.298619	0.0965758	-0.0292555	0.0869457	0.0869457
KTN1	ENST00000553360.5	0.00117753	0.0308766	-1.16681	0.359652	4.34251	0.345859	0.0664376	-0.0301289	0.127587	0.127587
TTN	ENST00000470257.1	0.00119426	0.0311321	-0.813839	0.251166	4.87289	0.329369	0.0122454	0.082381	0.0807133	0.082381
PCM1	ENST00000518936.5	0.00119509	0.0311413	-1.02199	0.315425	4.53207	0.332375	0.0186701	0.130569	0.107544	0.130569
PAM	ENST00000438793.7	0.00119628	0.0311495	-2.07722	0.641163	3.54916	1.15063	0.336819	0.113194	0.279815	0.279815
INPP4B	ENST00000513000.5	0.00120516	0.0313539	-0.88908	0.274606	6.6434	0.257946	0.00238737	0.110725	0.0292677	0.110725
MFN2	ENST00000412236.1	0.00120488	0.0313539	-1.36029	0.420138	4.32407	0.693433	0.0300293	0.234745	0.12987	0.234745
DNAJC13	ENST00000486798.5	0.00120619	0.0313681	-2.39194	0.738842	3.30657	1.61576	0.475836	0.197474	0.342995	0.342995
TNNT2	ENST00000367320.6	0.00121118	0.031473	-1.02293	0.316086	6.01631	0.40248	0.0117798	0.138086	0.0374204	0.138086
ZNF75A	ENST00000574298.5	0.001214	0.0315337	-1.45431	0.449477	4.35612	0.477596	0.177103	-0.081769	0.125941	0.125941
ETFDH	ENST00000511912.5	0.00122526	0.0317504	-0.656215	0.202978	5.57923	0.145442	0.0139075	0.0198791	0.0478927	0.0478927
STUB1	ENST00000564316.1	0.0012466	0.0321635	-4.20208	1.30176	1.42572	4.23452	1.34562	-0.114928	1.19625	1.19625
SYTL5	ENST00000456733.2	0.00124838	0.0321967	-0.93528	0.289777	6.95974	0.274433	0.00836042	0.117595	0.0269608	0.117595
MDN1	ENST00000369393.8	0.00125514	0.0323456	-0.643103	0.199347	7.42701	0.122427	0.0023968	0.0572122	0.0251347	0.0572122
SACS	ENST00000402364.1	0.0012581	0.0323964	-0.733454	0.227402	6.85095	0.1762	0.0499186	-0.00123526	0.0276486	0.0276486
NDRG2	ENST00000556008.5	0.00126013	0.032423	-4.31161	1.33697	1.89292	4.95012	1.76664	-0.114555	0.914591	0.914591
NTN4	ENST00000344911.8	0.00127514	0.0326809	-4.51307	1.40092	2.00757	6.65172	2.09047	0.731693	0.853374	0.853374
USP2	ENST00000455332.6	0.0012764	0.0327004	-0.5982	0.185705	6.0628	0.189179	0.0151388	0.032494	0.0365908	0.0365908
ANKRD13A	ENST00000547639.5	0.00127693	0.032701	-1.01668	0.315629	4.56001	0.263606	0.0444463	0.00660643	0.104986	0.104986
TRDN	ENST00000334268.9	0.00127916	0.0327326	-1.43626	0.445959	6.97356	0.874983	0.00167214	0.296647	0.026881	0.296647
SOS1	ENST00000395038.6	0.00130089	0.033146	-0.758461	0.235856	6.39806	0.175786	0.0060461	0.0773958	0.0317728	0.0773958
SLC5A1	ENST00000543737.2	0.00130417	0.0332168	-1.80922	0.562731	5.95514	1.4377	0.00547919	0.469521	0.038583	0.469521
IFTAP	ENST00000334307.9	0.00131225	0.0333966	-0.856317	0.266493	4.89333	0.173448	0.0271488	0.00399763	0.0793786	0.0793786
CEBPZOS	ENST00000402297.6	0.00133601	0.0339353	-0.662655	0.206555	6.37002	0.134584	0.00264485	0.0613526	0.0321075	0.0613526
ROGDI	ENST00000587377.5	0.0013448	0.0340791	-0.777979	0.242645	5.75315	0.15812	0.0452425	-0.0117313	0.0430724	0.0430724
ADAL	ENST00000562188.6	0.00135452	0.0342725	-0.850747	0.265512	5.01306	0.1599	0.0336432	-0.00291446	0.0721021	0.0721021
PPP1R14C	ENST00000361131.5	0.00135565	0.0342877	-1.02419	0.319668	7.59564	0.472496	0.000654972	0.152627	0.0248934	0.152627
ETFDH	ENST00000307738.5	0.0013581	0.0343098	-0.742372	0.231744	5.95851	0.201493	0.00626713	0.074291	0.0385169	0.074291
TLK1	ENST00000521943.5	0.00136168	0.0343606	-0.857009	0.267594	5.65264	0.166494	0.061673	-0.0304664	0.0457365	0.0457365
E2F6	ENST00000381525.8	0.00136638	0.0344408	-0.723682	0.226033	5.69624	0.173451	0.0320948	0.033813	0.0445419	0.0445419
PTDSS2	ENST00000632987.1	0.00136838	0.0344765	-3.57632	1.11717	1.62574	3.66948	0.803127	0.891989	1.06897	1.06897
KIAA2026	ENST00000381461.6	0.00138121	0.0346398	-0.996332	0.311495	6.23219	0.306281	0.03165	0.113894	0.0339218	0.113894
ARNT	ENST00000505979.5	0.00138947	0.0348038	-3.89955	1.21982	1.72404	3.69937	1.22176	-0.746315	1.01018	1.01018
TNS1	ENST00000490566.1	0.00139948	0.035004	-3.32856	1.04188	3.16032	3.33627	1.22477	0.403501	0.385683	0.403501
HERPUD1	ENST00000564678.1	0.00140102	0.035016	-1.98043	0.619963	3.30924	0.998832	0.234284	0.114106	0.342247	0.342247
AP3D1	ENST00000643010.1	0.00140422	0.0350769	-4.35305	1.36298	3.47611	5.90232	1.3545	1.43205	0.297934	1.43205
HCLS1	ENST00000314583.8	0.00140453	0.0350769	-2.91675	0.913278	3.39921	2.5635	0.359881	0.891235	0.317791	0.891235
CHCHD2	ENST00000395422.4	0.00144208	0.0358558	-2.40374	0.754448	3.53324	2.04605	0.309333	0.544454	0.283737	0.544454
PTPRD	ENST00000356435.9	0.00145098	0.0360034	-0.968119	0.304028	6.52014	0.283254	0.0342185	0.104431	0.0304368	0.104431
PTPRD	ENST00000634608.1	0.00145098	0.0360034	-0.968119	0.304028	6.52014	0.283254	0.0342185	0.104431	0.0304368	0.104431
UBE2Q2	ENST00000561851.5	0.00146088	0.0361759	-0.94253	0.296175	5.23476	0.29716	0.0707609	-0.0623803	0.0608182	0.0608182
RAPGEF1	ENST00000438647.3	0.00146603	0.0362531	-0.953495	0.299716	4.45146	0.27214	0.0193888	0.106657	0.115356	0.115356
SLC29A2	ENST00000619145.4	0.00148186	0.0365065	-4.47239	1.4072	2.21877	5.05467	2.22226	-1.85032	0.748067	0.748067
ITSN2	ENST00000361999.7	0.00148804	0.0366312	-1.35481	0.426442	6.26357	0.559133	0.174635	0.0981432	0.0334828	0.0981432
DMAC2L	ENST00000311459.11	0.00148916	0.0366451	-0.596585	0.187795	5.58856	0.0847182	0.00529246	0.00886058	0.047608	0.047608
AK9	ENST00000285397.9	0.00149994	0.0368375	-0.681236	0.214583	5.2055	0.11833	0.00690925	0.0263376	0.0621595	0.0621595
TYW3	ENST00000370867.8	0.00150307	0.0368628	-0.622866	0.196234	5.58886	0.102206	0.0101628	0.0221211	0.0475991	0.0475991
LSMEM2	ENST00000316436.4	0.00150979	0.0369859	-0.808386	0.254787	5.66651	0.216406	0.00457418	0.0928002	0.0453498	0.0928002
TACC2	ENST00000369001.5	0.0015149	0.0370972	-0.618614	0.195035	6.68298	0.136674	0.00589424	0.0511637	0.0289265	0.0511637
PDLIM5	ENST00000359265.8	0.00152962	0.0374016	-0.762737	0.240687	5.52065	0.250553	0.00477518	0.0821199	0.0497519	0.0821199
ASB13	ENST00000479033.1	0.00153707	0.0375557	-4.07535	1.28658	3.10308	5.0585	2.07955	-0.68181	0.403365	0.403365
TARS3	ENST00000558533.5	0.00153689	0.0375557	-0.938024	0.296128	5.47253	0.296411	0.0260598	0.105478	0.0513757	0.105478
JPH1	ENST00000342232.5	0.00154354	0.0376295	-0.804457	0.254063	6.79266	0.215714	0.00187016	0.0949517	0.0280616	0.0949517
COX20	ENST00000366528.3	0.00154932	0.0377143	-0.940295	0.297065	4.86685	0.493109	0.0512586	0.0713218	0.0811129	0.0811129
VPS13D	ENST00000613099.4	0.00155254	0.0377787	-0.809855	0.255904	7.20054	0.214294	0.052827	0.0454035	0.0258004	0.0454035
CSAD	ENST00000267085.8	0.00155891	0.0378899	-4.24207	1.34095	2.08862	4.8329	1.88538	-1.02142	0.811835	0.811835
SLC8A1	ENST00000448531.1	0.00155943	0.0378899	-1.13685	0.359377	5.54045	0.428923	0.00624646	0.187482	0.0491091	0.187482
TPM4	ENST00000646575.1	0.00156887	0.038091	-6.145	1.94362	2.9014	12.8363	1.0779	4.58857	0.470042	4.58857
ACTN2	ENST00000651786.1	0.0015764	0.0381888	-0.861804	0.272702	8.5029	0.320835	0.00137429	0.110175	0.0273358	0.110175
ZNF528	ENST00000598479.1	0.00160251	0.0386355	-1.08653	0.344333	4.47978	0.310506	0.0653241	0.0453209	0.112524	0.112524
MYL6	ENST00000550639.1	0.00161272	0.0388103	-0.879473	0.27888	7.58491	0.322199	0.00104178	0.115619	0.0249024	0.115619
TUFT1	ENST00000498606.5	0.00161793	0.0388927	-3.87835	1.23019	1.30557	3.93633	0.992269	0.485143	1.27776	1.27776
FBXO11	ENST00000402508.5	0.00162553	0.0390181	-5.60749	1.77943	2.98817	11.7529	1.8548	2.89474	0.440521	2.89474
TPM1	ENST00000558264.5	0.00162829	0.03907	-1.1989	0.380507	5.29869	0.454382	0.0115994	0.205579	0.0580319	0.205579
FBXO9	ENST00000244426.10	0.00163153	0.0391152	-0.78123	0.247993	4.95258	0.198734	0.0156578	0.076593	0.0756653	0.076593
SENP6	ENST00000483859.6	0.00163341	0.0391355	-0.781039	0.247959	4.97407	0.179671	0.017852	0.0644711	0.0743735	0.0743735
COPS2	ENST00000558843.5	0.00164423	0.0393659	-0.698381	0.221853	5.4158	0.144018	0.0204206	0.0187824	0.0534076	0.0534076
C1QBP	ENST00000574444.5	0.00165727	0.0396056	-0.597355	0.1899	6.94315	0.173159	0.0052318	0.048861	0.0270589	0.048861
NAV1	ENST00000490213.5	0.00166257	0.0396455	-1.16605	0.370799	6.6524	0.469171	0.00405327	0.202184	0.0291887	0.202184
PITRM1	ENST00000430362.1	0.00166164	0.0396455	-2.75686	0.876623	2.82021	1.51852	0.653911	-0.531636	0.498792	0.498792
BPTF	ENST00000424123.7	0.0016694	0.039722	-0.688438	0.219004	7.55388	0.143471	0.00365061	0.0682932	0.0249333	0.0682932
C3orf18	ENST00000449241.5	0.00166942	0.039722	-4.6482	1.47867	2.14902	6.71952	2.4979	0.768025	0.781795	0.781795
TACR2	ENST00000373307.5	0.0016819	0.0398071	-0.993674	0.316324	4.29959	0.280601	0.0170927	0.092142	0.132999	0.132999
AC084357.3	ENST00000541353.2	0.00167956	0.0398071	-1.01118	0.321856	7.91114	0.340412	0.000353944	0.155033	0.0250129	0.155033
KANK2	ENST00000588724.5	0.00168159	0.0398071	-0.798731	0.254262	4.85499	0.136575	0.0150687	0.00741679	0.081905	0.081905
GLMN	ENST00000370360.8	0.00167616	0.0398071	-0.613655	0.195288	5.462	0.132567	0.00546288	0.0256163	0.051743	0.051743
MYL7	ENST00000431007.1	0.00168483	0.039857	-0.97054	0.30901	5.50224	0.374745	0.00890296	0.134328	0.0503625	0.134328
ENOX2	ENST00000610637.1	0.00170179	0.0401711	-0.648344	0.206619	5.49559	0.174711	0.0134508	0.0486866	0.0505863	0.0505863
CLDND1	ENST00000506885.5	0.00172029	0.0405637	-3.12013	0.995352	1.74871	2.57982	0.490282	0.511116	0.995806	0.995806
PGRMC2	ENST00000512483.5	0.00172393	0.040635	-1.03853	0.331365	5.76569	0.28276	0.121943	-0.0305748	0.0427616	0.0427616
ATP2A2	ENST00000308664.10	0.00174429	0.040982	-1.14917	0.367073	9.87755	0.482482	0.000170071	0.201944	0.0481518	0.201944
AKAP13	ENST00000559486.2	0.00174934	0.0410565	-1.66741	0.532755	3.40334	0.718378	0.109042	0.146153	0.316699	0.316699
ATG16L1	ENST00000392018.1	0.00176054	0.0412602	-0.880439	0.281478	5.10679	0.26438	0.0518381	0.0198291	0.0670069	0.0670069
ATG16L1	ENST00000626639.1	0.00176054	0.0412602	-0.880439	0.281478	5.10679	0.26438	0.0518381	0.0198291	0.0670069	0.0670069
TIPARP	ENST00000481853.5	0.00176488	0.0412991	-0.862005	0.275649	6.41317	0.269619	0.007411	0.106562	0.031597	0.106562
PDE4D	ENST00000546160.5	0.00176564	0.0412991	-0.80911	0.258745	6.58542	0.271587	0.0119391	0.088484	0.0297968	0.088484
DYRK1A	ENST00000643854.1	0.00176671	0.0413013	-2.65083	0.847754	2.77764	2.36276	0.540951	0.537081	0.514294	0.537081
HSP90AA1	ENST00000554401.1	0.00177621	0.0414197	-1.17305	0.375338	4.52555	0.38513	0.103168	-0.0368205	0.108151	0.108151
PPP1R12B	ENST00000290419.9	0.00178278	0.0415582	-2.53649	0.811881	3.62674	1.37161	0.727787	-0.613104	0.260939	0.260939
CASQ1	ENST00000368078.8	0.00178479	0.0415605	-0.824672	0.263989	6.02419	0.336316	0.00269405	0.101841	0.0372765	0.101841
FBXO40	ENST00000338040.6	0.00178401	0.0415605	-1.63431	0.523145	5.79597	0.945232	0.00340566	0.407116	0.0420297	0.407116
YY1AP1	ENST00000476093.5	0.00178951	0.0416557	-1.47963	0.473768	3.6135	0.61801	0.0725542	-0.00455038	0.26413	0.26413
C7orf26	ENST00000472693.1	0.00179218	0.0416954	-3.93398	1.25981	1.84345	5.67568	0.958459	1.42223	0.941916	1.42223
ZNF655	ENST00000493277.5	0.00181247	0.0420313	-0.745887	0.239116	5.35134	0.170245	0.0217891	0.0639755	0.0558787	0.0639755
CBX5	ENST00000550411.5	0.00181445	0.0420569	-1.09122	0.349858	4.46656	0.405585	0.0633222	0.120279	0.113829	0.120279
SLC25A4	ENST00000491736.1	0.00181859	0.0420822	-0.719629	0.230771	8.40663	0.221336	0.000274084	0.0796091	0.0267568	0.0796091
MYL4	ENST00000576874.5	0.00183311	0.0422798	-0.634247	0.203544	5.58719	0.0920662	0.0144956	-0.000406517	0.0476498	0.0476498
NFATC3	ENST00000569766.5	0.00184159	0.0423687	-4.17126	1.33923	2.74003	4.52561	2.16209	-0.665383	0.528237	0.528237
NSD1	ENST00000439151.6	0.00184444	0.0423917	-0.68396	0.219626	6.74503	0.138985	0.0439307	0.0229773	0.0284229	0.0284229
GPR65	ENST00000267549.5	0.00186142	0.0426621	-2.12411	0.682667	2.66055	1.23665	0.140581	0.212892	0.55847	0.55847
PPP2CA	ENST00000472253.1	0.00187324	0.0428881	-0.657984	0.211596	5.40539	0.132405	0.0133646	0.00586682	0.0537946	0.0537946
EFCAB2	ENST00000366523.5	0.00187749	0.0429264	-1.17942	0.379361	4.16602	0.391959	0.0638372	0.0146358	0.152035	0.152035
NUSAP1	ENST00000560177.5	0.00188768	0.0430829	-3.84952	1.23884	2.18283	5.06211	1.53677	-1.19435	0.76532	0.76532
HSPG2	ENST00000644714.1	0.00189181	0.0430976	-1.35043	0.434682	4.53626	0.59453	0.0166602	0.266763	0.107156	0.266763
DGKI	ENST00000453654.6	0.00191114	0.0434269	-1.44069	0.464186	7.76355	0.793858	0.000748993	0.322453	0.0248644	0.322453
TRMT2B	ENST00000545398.5	0.00192844	0.0436631	-0.6369	0.205383	5.75217	0.137205	0.0201763	0.0190582	0.0430969	0.0430969
PABPC4	ENST00000421687.6	0.00196649	0.0442948	-0.958359	0.309623	6.06099	0.28583	0.0889768	0.0548227	0.0366222	0.0548227
AZI2	ENST00000334100.10	0.00197876	0.0445075	-1.23608	0.399586	4.13758	0.408158	0.0829817	-0.00483355	0.156521	0.156521
C9orf72	ENST00000380003.7	0.00198066	0.0445221	-0.61472	0.198738	5.56622	0.106158	0.0109504	0.03523	0.0482949	0.0482949
NAMPTP1	ENST00000440465.1	0.00198859	0.0446696	-0.687175	0.222248	5.14161	0.166822	0.00885274	0.0621655	0.0652385	0.0652385
RAPGEF2	ENST00000503328.1	0.00199445	0.0447092	-1.51626	0.490532	3.40824	0.608765	0.0455224	0.153	0.315409	0.315409
S1PR1	ENST00000305352.6	0.00200999	0.0449806	-0.974304	0.315436	7.17255	0.368674	0.00461135	0.144639	0.0259107	0.144639
MTUS2	ENST00000612955.5	0.0020184	0.0451379	-0.914229	0.296105	7.56304	0.364027	0.000776669	0.130741	0.0249234	0.130741
OR4F17	ENST00000641591.1	0.00202453	0.0452286	-0.665969	0.215761	5.17666	0.118253	0.0063059	0.0282935	0.0635231	0.0635231
RIOK3	ENST00000581302.5	0.00203688	0.0454425	-1.08643	0.352189	5.90776	0.298453	0.146513	-0.0827393	0.0395428	0.0395428
LRRC10	ENST00000361484.4	0.00203928	0.0454486	-1.36868	0.443735	7.0743	0.67878	0.00124213	0.294109	0.0263484	0.294109
NUP210	ENST00000420141.2	0.00204997	0.0455482	-4.06074	1.31718	1.65366	5.01208	1.55044	0.754553	1.05202	1.05202
CACNA2D1	ENST00000443883.1	0.00205364	0.0456143	-3.6682	1.19006	1.72211	4.15158	1.11306	0.580687	1.01131	1.01131
HPS5	ENST00000396253.7	0.00205587	0.0456483	-0.679432	0.220449	5.87595	0.141305	0.0218007	0.0510957	0.0402174	0.0510957
HCST	ENST00000246551.8	0.00207053	0.0458959	-2.51885	0.817829	2.6136	2.27222	0.426434	-0.228096	0.576833	0.576833
TRIM63	ENST00000374272.3	0.00207672	0.0459677	-1.02838	0.333995	7.48606	0.429523	0.000670637	0.166658	0.0250259	0.166658
TECRL	ENST00000381210.7	0.00208302	0.0460263	-1.11213	0.361301	7.542	0.384169	0.00101572	0.194792	0.024947	0.194792
ARHGAP26	ENST00000645722.2	0.00208344	0.0460263	-0.814369	0.264571	6.11518	0.210508	0.0420431	0.0629536	0.0357084	0.0629536
CCPG1	ENST00000442196.7	0.00211081	0.0465053	-0.595985	0.193868	6.03986	0.109462	0.013232	0.0431451	0.0369945	0.0431451
ADPRHL1	ENST00000375418.7	0.00211492	0.0465175	-1.01603	0.330568	6.31919	0.465201	0.00345842	0.160454	0.032743	0.160454
PCDH9	ENST00000377861.4	0.00212023	0.0466045	-0.786951	0.256098	5.99784	0.193413	0.00368382	0.0946953	0.0377627	0.0946953
PRSS42P	ENST00000447340.1	0.00212208	0.0466281	-1.05108	0.342082	5.04811	0.460259	0.00792016	0.16761	0.0701381	0.16761
MACF1	ENST00000567887.5	0.0021275	0.0467158	-3.98654	1.29777	5.36969	4.43307	2.47117	-0.75088	0.0551569	0.0551569
CCSER2	ENST00000494586.5	0.00214261	0.0469707	-0.900826	0.293456	4.49987	0.20697	0.018594	0.0225774	0.11058	0.11058
CYP46A1	ENST00000554611.5	0.00214254	0.0469707	-1.12666	0.367024	3.99197	0.340398	0.020204	0.0897652	0.181856	0.181856
ANKRD11	ENST00000642443.1	0.0021427	0.0469707	-4.1389	1.3483	2.92623	6.31763	1.06875	1.65814	0.461465	1.65814
PGRMC2	ENST00000503588.1	0.00214693	0.0470478	-0.641813	0.20912	6.33095	0.151857	0.00928134	0.0563154	0.0325926	0.0563154
MDM2	ENST00000544125.1	0.00215141	0.0470828	-3.13877	1.0229	2.73175	2.73555	1.03816	0.145201	0.531335	0.531335
EMP2	ENST00000359543.8	0.00215039	0.0470828	-0.891462	0.290508	8.34738	0.259339	0.000280817	0.126311	0.0264415	0.126311
RCHY1	ENST00000324439.9	0.0021808	0.0475711	-0.605062	0.197446	5.46243	0.0966856	0.00674953	0.0147887	0.0517281	0.0517281
KIF1B	ENST00000377083.5	0.002196	0.0477509	-2.20761	0.720886	5.6563	1.55278	0.477537	0.301977	0.0456339	0.301977
RNF111	ENST00000561186.5	0.00220153	0.0478437	-0.722106	0.235859	6.05681	0.115243	0.0467488	-0.023544	0.0366952	0.0366952
MRTFA	ENST00000402042.6	0.00220277	0.0478549	-4.17483	1.36368	2.65011	4.55833	2.22693	-1.28295	0.562518	0.562518
FGF7	ENST00000560765.6	0.00220424	0.0478709	-1.27086	0.415145	3.97302	0.480575	0.0730785	0.161747	0.18544	0.18544
HECTD4	ENST00000550722.5	0.00221023	0.0479691	-1.15976	0.378953	6.56501	0.410097	0.185416	-0.0310533	0.0299916	0.0299916
SRRM1	ENST00000468822.5	0.00221523	0.0479983	-3.08161	1.00715	3.14215	2.97399	0.438528	1.08299	0.391237	1.08299
RSBN1L	ENST00000445288.5	0.00221936	0.0480558	-0.636337	0.208008	5.45313	0.111496	0.0128452	0.0167777	0.0520561	0.0520561
DGLUCY	ENST00000256324.14	0.00222192	0.0480795	-0.716324	0.234181	5.61182	0.126385	0.0353489	-0.00424425	0.0469124	0.0469124
EIF4H	ENST00000495187.1	0.00222351	0.0480947	-3.62052	1.18371	1.74195	4.23392	1.02146	1.08029	0.999733	1.08029
NPNT	ENST00000379987.6	0.00222657	0.0481111	-0.784142	0.256405	8.3917	0.197061	0.000615401	0.0979998	0.0266744	0.0979998
SYNPO2L	ENST00000372873.8	0.00223627	0.0482305	-1.00021	0.327196	9.1989	0.472611	0.000175178	0.160411	0.0344035	0.160411
TNNC1	ENST00000232975.7	0.0022351	0.0482305	-0.808258	0.26439	9.61556	0.328934	8.57005e-05	0.104767	0.0418047	0.104767
HACD1	ENST00000471481.1	0.00225027	0.0484588	-1.00071	0.327559	4.59513	0.347962	0.0590734	0.0320567	0.101869	0.101869
UBAP2L	ENST00000441890.5	0.00226819	0.0487369	-3.55854	1.16571	3.88266	4.04227	0.624474	1.41386	0.203389	1.41386
CLEC2D	ENST00000290855.11	0.00227005	0.0487472	-0.986512	0.32319	4.36094	0.359717	0.019357	0.137321	0.125366	0.137321
PPP1R12A	ENST00000650220.1	0.00227661	0.0488169	-0.680319	0.222942	5.27398	0.148734	0.0154686	0.0305876	0.059086	0.059086
SLC2A4	ENST00000317370.12	0.00228049	0.0488622	-1.04324	0.34193	5.0939	0.353811	0.0941442	0.0812301	0.0676779	0.0812301
SCYL2	ENST00000549687.5	0.00230775	0.0493333	-0.851691	0.279474	5.2246	0.232827	0.0258406	0.0913184	0.0612794	0.0913184
CEBPG	ENST00000284000.9	0.00230885	0.0493407	-0.604639	0.198416	6.91564	0.154438	0.00593131	0.0531221	0.0272269	0.0531221
PPP3CB	ENST00000360663.9	0.00231184	0.0493885	-1.14867	0.376991	4.63404	0.287583	0.114645	-0.0616159	0.0985389	0.0985389
THAP9	ENST00000302236.10	0.00233324	0.0497159	-0.62404	0.204995	5.3619	0.085942	0.00757312	0.00251371	0.0554614	0.0554614
FAM189A2	ENST00000645516.1	0.00233426	0.0497213	-0.936826	0.307758	5.0157	0.311723	0.0147179	0.127354	0.071952	0.127354
ROCK2	ENST00000401753.5	0.00234218	0.0498413	-0.586814	0.19284	6.11125	0.112402	0.020008	0.017981	0.0357726	0.0357726
ADCY5	ENST00000309879.9	0.00234162	0.0498413	-1.38053	0.45366	5.75452	0.709781	0.0183724	0.290338	0.0430382	0.290338
NA	ENST00000556740.5	0.00234954	0.0499007	-0.622769	0.204719	5.46138	0.107276	0.0110999	0.0273982	0.0517647	0.0517647
CYP1B1	ENST00000610745.5	0.00235218	0.0499204	-1.25731	0.413354	5.51677	0.621117	0.00710077	0.249191	0.0498796	0.249191
MYO18B	ENST00000540454.1	0.00235466	0.0499204	-1.72957	0.568673	3.47015	0.808782	0.185645	0.103656	0.299439	0.299439
FOXJ3	ENST00000372573.5	0.00235332	0.0499204	-0.924021	0.303795	5.76402	0.228998	0.0956347	-0.00850513	0.0428026	0.0428026

## Sheet: WT v UBE2B Null1, WT down
ext_gene	target_id	pval	qval	b	se_b	mean_obs	var_obs	tech_var	sigma_sq	smooth_sigma_sq	final_sigma_sq
CTNND1	ENST00000529986.5	9.81938e-62	6.42747e-57	8.8628	0.534567	4.97482	18.4661	0.0225956	0.406047	0.0743292	0.406047
SRP68	ENST00000539137.5	1.79021e-32	5.85908e-28	6.68413	0.563329	3.66414	10.7726	0.223988	-0.121986	0.252021	0.252021
MYADM	ENST00000448420.5	1.16077e-26	1.51961e-22	6.05962	0.566966	3.48786	10.0903	0.18719	0.11107	0.294985	0.294985
TPT1	ENST00000527226.2	6.69547e-24	7.30443e-20	1.48343	0.147149	7.22888	0.595554	0.0060455	0.0264337	0.0256951	0.0264337
SPTAN1	ENST00000372739.5	1.0826e-21	1.01234e-17	6.47727	0.676923	4.47995	13.5886	0.574829	-0.134469	0.112507	0.112507
NKD1	ENST00000268459.6	4.6337e-21	3.79135e-17	2.40742	0.255641	5.88522	1.38111	0.00748682	0.0905418	0.0400182	0.0905418
FCGRT	ENST00000426395.7	1.04898e-18	7.62925e-15	1.38153	0.156462	6.49369	0.482957	0.00601034	0.00871497	0.0307104	0.0307104
TTYH3	ENST00000258796.12	2.07648e-17	1.04554e-13	1.25663	0.148023	8.75609	0.439332	0.00212194	0.0307441	0.0292806	0.0307441
PCSK1N	ENST00000218230.6	1.21622e-16	5.30736e-13	1.21587	0.146818	6.569	0.329916	0.0019109	0.0304222	0.0299532	0.0304222
RTN4	ENST00000402434.6	1.3252e-16	5.42149e-13	6.58866	0.79657	4.46858	10.9832	0.838157	0.00607625	0.113628	0.113628
ITPRID2	ENST00000467172.2	1.73639e-16	6.68581e-13	6.26836	0.760815	3.33607	9.25899	0.533445	-0.414493	0.334815	0.334815
MEX3D	ENST00000402693.4	1.61261e-15	5.0265e-12	1.21097	0.151979	6.65541	0.324396	0.00548369	0.0232739	0.0291625	0.0291625
ANKRD30BL	ENST00000470729.5	6.55627e-15	1.86589e-11	1.58999	0.204034	5.61457	0.531818	0.00465007	0.0577946	0.0468312	0.0577946
CD276	ENST00000318443.10	7.67797e-15	2.09407e-11	1.19228	0.153392	7.56193	0.370442	0.0103689	0.0154494	0.0249246	0.0249246
SLMAP	ENST00000416658.5	1.16416e-14	3.04809e-11	5.47005	0.708565	3.12949	8.46526	0.357958	-0.100013	0.395138	0.395138
SDC2	ENST00000520233.1	2.57048e-14	5.80194e-11	5.60012	0.735088	3.12696	8.25795	0.41461	-0.365805	0.395923	0.395923
ATP11A	ENST00000419631.1	3.2831e-14	6.93231e-11	5.55806	0.732612	2.97627	7.72659	0.360584	-0.159842	0.444496	0.444496
SEZ6L2	ENST00000346932.9	6.44363e-14	1.31807e-10	4.89743	0.6531	2.73721	6.79217	0.11052	0.0586176	0.52929	0.52929
SEZ6L2	ENST00000308713.9	3.95648e-13	7.61705e-10	1.54866	0.213402	6.85553	0.760523	0.00775514	0.0605552	0.0276176	0.0605552
TMUB1	ENST00000297533.9	4.64507e-13	8.68721e-10	1.28846	0.17808	6.1187	0.407008	0.0119175	0.0216312	0.035651	0.035651
PPP6R3	ENST00000534190.5	5.07285e-13	9.2237e-10	6.26634	0.867514	3.47444	9.82337	0.830514	-0.75904	0.298356	0.298356
TNIK	ENST00000470834.5	2.60258e-12	3.96261e-09	6.01547	0.859639	3.50604	10.4764	0.818007	-0.154505	0.290463	0.290463
SUN2	ENST00000405018.5	3.26237e-12	4.74968e-09	1.27809	0.183477	6.7919	0.397843	0.0224287	0.0152822	0.0280672	0.0280672
PLCB3	ENST00000279230.10	4.79457e-12	6.82257e-09	1.10437	0.159786	6.50065	0.330164	0.00765989	0.0208829	0.0306376	0.0306376
NOTCH3	ENST00000263388.7	9.41968e-12	1.20899e-08	1.54968	0.227389	8.35777	0.783221	0.000518436	0.0770399	0.0264946	0.0770399
NA	ENST00000435882.6	1.05133e-11	1.29843e-08	6.55678	0.964332	3.99734	12.4046	1.21405	-0.728429	0.180853	0.180853
ADAMTS7	ENST00000388820.5	1.16617e-11	1.3879e-08	1.45461	0.214408	6.31666	0.621801	0.00312309	0.0658328	0.0327755	0.0658328
PCED1B	ENST00000432328.2	1.31673e-11	1.53909e-08	4.7419	0.700761	2.5409	6.35144	0.130552	0.481805	0.606046	0.606046
SLC9A3R1	ENST00000262613.10	1.69807e-11	1.8839e-08	1.60577	0.238603	7.08881	0.83961	0.00344002	0.0819568	0.0262787	0.0819568
CALM1	ENST00000553995.5	2.07081e-11	2.25915e-08	5.35203	0.798698	2.84091	7.09363	0.465518	-0.372443	0.491358	0.491358
NLGN2	ENST00000575301.5	2.99151e-11	3.10818e-08	1.29027	0.194113	5.53733	0.614819	0.00731031	0.0383902	0.0492097	0.0492097
NLGN2	ENST00000639647.1	2.99151e-11	3.10818e-08	1.29027	0.194113	5.53733	0.614819	0.00731031	0.0383902	0.0492097	0.0492097
SSC4D	ENST00000275560.4	4.40826e-11	4.50861e-08	1.54614	0.234631	5.49842	0.694865	0.0100672	0.0725102	0.050491	0.0725102
HLA-A	ENST00000638375.1	4.66646e-11	4.62807e-08	4.98509	0.757474	2.43491	5.89933	0.210238	0.231116	0.650412	0.650412
CXCL14	ENST00000512158.5	5.57611e-11	5.30589e-08	2.7049	0.412666	5.78823	1.70303	0.0175373	0.237903	0.0422144	0.237903
KLRD1	ENST00000381908.7	6.26849e-11	5.86166e-08	4.50024	0.688405	2.33643	5.19646	0.0172031	0.0256845	0.69365	0.69365
MID1IP1	ENST00000336949.6	7.26737e-11	6.60695e-08	5.66878	0.870107	3.03522	7.97088	0.710589	-0.512701	0.42504	0.42504
NDUFV3	ENST00000354250.7	1.08969e-10	9.14462e-08	1.84092	0.285238	6.37164	0.969713	0.0899535	0.0162782	0.032088	0.032088
ACTB	ENST00000473257.2	1.75365e-10	1.38299e-07	7.51768	1.17804	4.05879	14.377	1.16113	0.920549	0.169743	0.920549
MEX3C	ENST00000406189.4	2.34505e-10	1.80588e-07	1.08532	0.17127	6.28056	0.38331	0.0107487	0.00308539	0.0332516	0.0332516
HDAC7	ENST00000080059.12	2.78109e-10	2.11677e-07	1.49712	0.237241	6.69029	0.660167	0.018675	0.0657503	0.0288652	0.0657503
UBE3A	ENST00000566215.5	3.34361e-10	2.45913e-07	5.86194	0.93314	3.19283	8.64062	0.930241	-0.7361	0.375886	0.375886
MZT2B	ENST00000281871.10	3.85887e-10	2.74554e-07	1.12417	0.179591	6.164	0.301299	0.0134461	0.0327292	0.0349332	0.0349332
ZNF579	ENST00000325421.7	4.144e-10	2.88568e-07	0.924121	0.147895	6.48578	0.244589	0.00201544	0.0192954	0.0307938	0.0307938
RAB34	ENST00000395245.9	5.38556e-10	3.59717e-07	0.871006	0.140316	7.20103	0.204877	0.00373455	0.0256272	0.0257985	0.0257985
FAM20C	ENST00000313766.6	5.84878e-10	3.86711e-07	1.17855	0.190258	5.85576	0.338766	0.00651959	0.0477777	0.0406591	0.0477777
RNF187	ENST00000305943.8	6.70766e-10	4.30455e-07	1.02379	0.165854	6.43946	0.253479	0.00996316	0.00265499	0.0312984	0.0312984
B4GALNT4	ENST00000329962.11	6.57764e-10	4.30455e-07	1.64033	0.265601	7.15903	0.730622	0.00136896	0.104447	0.0259662	0.104447
RNF187	ENST00000643372.2	6.70766e-10	4.30455e-07	1.02379	0.165854	6.43946	0.253479	0.00996316	0.00265499	0.0312984	0.0312984
C2CD4C	ENST00000332235.8	7.42858e-10	4.67551e-07	1.35801	0.220575	5.15103	0.546069	0.00820869	0.0600268	0.064771	0.064771
TNFAIP8L1	ENST00000327473.9	8.51025e-10	5.20613e-07	1.08852	0.177425	5.7728	0.266299	0.00463225	0.028495	0.0425875	0.0425875
HYAL2	ENST00000395139.7	1.03187e-09	6.19662e-07	1.10562	0.181118	6.26848	0.283962	0.0157902	0.00961776	0.0334155	0.0334155
TCF3	ENST00000262965.10	1.12433e-09	6.69049e-07	0.839155	0.137777	7.53568	0.175681	0.00351894	0.0241991	0.0249548	0.0249548
DGKZ	ENST00000456247.6	1.23924e-09	7.30785e-07	1.01572	0.167194	6.54883	0.24984	0.0117811	0.0156449	0.0301495	0.0301495
ATXN2L	ENST00000340394.12	1.25224e-09	7.31858e-07	0.99643	0.164064	7.27465	0.236811	0.0148372	0.00825557	0.0255385	0.0255385
HOMER3	ENST00000392351.8	1.30459e-09	7.49076e-07	1.00428	0.165535	6.1615	0.276694	0.00613114	0.0266748	0.0349718	0.0349718
PLPPR3	ENST00000520876.7	1.31806e-09	7.50226e-07	1.42285	0.234593	6.46648	0.66525	0.00330299	0.0792476	0.0310008	0.0792476
SEZ6L2	ENST00000617533.4	1.67047e-09	9.18859e-07	1.42969	0.237215	7.18808	0.697849	0.00467674	0.0797296	0.0258487	0.0797296
ATP2B4	ENST00000357681.9	1.8298e-09	9.98109e-07	1.08345	0.180207	7.20216	0.520767	0.0229178	0.0253307	0.0257942	0.0257942
ABI2	ENST00000454023.1	2.14799e-09	1.15247e-06	4.71949	0.788395	2.60919	6.42816	0.35377	-0.0167048	0.578581	0.578581
MEIS2	ENST00000559561.5	2.22498e-09	1.17672e-06	5.71172	0.955063	3.4515	8.98307	1.06403	-0.942902	0.304184	0.304184
PDIA4	ENST00000286091.9	2.57223e-09	1.31413e-06	1.32456	0.222361	6.20333	0.545302	0.0295007	0.0446657	0.0343401	0.0446657
PTPRF	ENST00000429895.5	2.58984e-09	1.31413e-06	1.6567	0.278172	7.4582	0.684376	0.0482444	0.0678248	0.0250739	0.0678248
LMTK3	ENST00000600059.5	3.92554e-09	1.88937e-06	5.36997	0.912128	3.02148	8.07668	0.818443	-0.439168	0.429523	0.429523
TPT1	ENST00000442760.2	4.41557e-09	2.10971e-06	0.863913	0.147229	7.24478	0.238442	0.00172979	0.0307848	0.0256388	0.0307848
RPL8	ENST00000394920.6	4.57979e-09	2.17231e-06	0.938982	0.160188	8.00281	0.267911	0.0133019	0.0122268	0.0251882	0.0251882
TMEM132A	ENST00000453848.6	5.12363e-09	2.35828e-06	1.04655	0.179109	6.61467	0.322946	0.0185945	0.0154994	0.0295254	0.0295254
SSC5D	ENST00000389623.11	5.15199e-09	2.35828e-06	2.56027	0.438238	5.7992	1.81566	0.00922389	0.278855	0.0419531	0.278855
ACKR3	ENST00000272928.4	6.2083e-09	2.7834e-06	1.69541	0.291756	6.1348	0.838863	0.00398361	0.123699	0.0353916	0.123699
PPDPF	ENST00000370179.8	6.55858e-09	2.90071e-06	0.770581	0.132816	8.29712	0.147825	0.000262385	0.0112963	0.0261979	0.0261979
RDX	ENST00000530085.2	6.99907e-09	3.07475e-06	5.5655	0.961069	3.0677	7.88864	0.970911	-0.904282	0.414569	0.414569
DOCK6	ENST00000294618.12	7.13581e-09	3.11393e-06	1.33318	0.230347	6.08791	0.536558	0.0071187	0.0724712	0.0361611	0.0724712
NME2	ENST00000512737.5	7.51703e-09	3.21596e-06	0.776285	0.13433	7.79755	0.161943	0.00218267	0.0189881	0.0248841	0.0248841
MPST	ENST00000429360.5	8.55097e-09	3.53441e-06	0.815855	0.14171	6.86505	0.183988	0.00256908	0.0196652	0.0275534	0.0275534
RCC2	ENST00000631021.3	8.48405e-09	3.53441e-06	0.758332	0.131688	7.64524	0.155645	0.000305499	0.0257071	0.024863	0.0257071
RCC2	ENST00000375436.9	8.48405e-09	3.53441e-06	0.758332	0.131688	7.64524	0.155645	0.000305499	0.0257071	0.024863	0.0257071
MAF	ENST00000569649.1	9.72933e-09	3.86641e-06	4.45843	0.777356	2.35017	5.46189	0.218927	0.105912	0.687498	0.687498
EPHB4	ENST00000358173.8	9.74621e-09	3.86641e-06	1.08292	0.188824	7.95553	0.335064	0.00224076	0.051241	0.0250897	0.051241
GNB2	ENST00000303210.9	9.89145e-09	3.87703e-06	0.788537	0.137554	8.13347	0.17728	0.00283086	0.010646	0.0255506	0.0255506
FAHD1	ENST00000615972.1	1.08625e-08	4.18252e-06	4.98626	0.87223	2.69575	6.6245	0.59623	-0.386462	0.544948	0.544948
CTBP1	ENST00000514596.1	1.17366e-08	4.46652e-06	5.66751	0.993689	2.80403	7.33426	0.976479	-0.548024	0.504648	0.504648
MAP3K11	ENST00000309100.8	1.31661e-08	4.98159e-06	1.05522	0.185651	6.93165	0.289042	0.00288008	0.0488193	0.0271283	0.0488193
GAA	ENST00000390015.7	1.6453e-08	6.05036e-06	0.744759	0.131917	7.54343	0.148625	0.00115765	0.00412683	0.0249453	0.0249453
MBOAT7	ENST00000245615.6	1.72078e-08	6.29257e-06	0.929474	0.16486	7.24554	0.219285	0.00218365	0.0385846	0.0256362	0.0385846
LTBP3	ENST00000301873.9	1.76987e-08	6.43613e-06	1.08921	0.193359	7.91514	0.338133	0.00398618	0.0520952	0.0250192	0.0520952
PGLS	ENST00000252603.7	1.86297e-08	6.70024e-06	0.864988	0.153796	6.57102	0.201965	0.00197924	0.0335004	0.0299338	0.0335004
TRIM28	ENST00000253024.10	1.93413e-08	6.84335e-06	0.838079	0.149183	7.63709	0.213306	0.00851656	0.0159766	0.0248668	0.0248668
FOXP4	ENST00000307972.8	1.92743e-08	6.84335e-06	0.75702	0.13474	7.8347	0.156303	0.000995768	0.0262364	0.0249155	0.0262364
MED25	ENST00000312865.10	1.95453e-08	6.87836e-06	1.06137	0.188991	6.27726	0.343072	0.0163749	0.0372017	0.0332962	0.0372017
KRT5	ENST00000252242.9	1.9846e-08	6.94598e-06	4.17231	0.743284	2.28528	3.98415	0.111783	0.149782	0.716924	0.716924
LGR6	ENST00000367278.7	2.0744e-08	7.18433e-06	4.92016	0.87771	2.22934	5.86524	0.41251	0.714369	0.743052	0.743052
PRKD2	ENST00000291281.8	2.26968e-08	7.81928e-06	1.02395	0.183174	6.3546	0.332167	0.0180325	-0.00141083	0.0322964	0.0322964
NA	ENST00000277541.7	2.39393e-08	8.11914e-06	0.963556	0.172655	6.97503	0.242017	0.0178421	0.00685396	0.0268725	0.0268725
CTSB	ENST00000533455.5	2.44623e-08	8.25375e-06	0.822292	0.147442	8.55886	0.219011	0.00489714	0.0250266	0.0277115	0.0277115
LMF2	ENST00000474879.7	2.50386e-08	8.40489e-06	0.794791	0.142615	7.0418	0.185894	0.00389819	0.0266102	0.0265107	0.0266102
MYO9B	ENST00000597073.5	2.89579e-08	9.47748e-06	1.23369	0.222382	5.41384	0.352746	0.0207009	0.0498017	0.0534799	0.0534799
SOX4	ENST00000244745.3	3.60106e-08	1.16116e-05	0.80743	0.146556	9.02245	0.163732	0.000148228	0.016282	0.0320696	0.0320696
CORO1B	ENST00000393893.5	3.79134e-08	1.21059e-05	1.05784	0.192323	6.88238	0.308318	0.00254906	0.0529331	0.027439	0.0529331
PCBP4	ENST00000355852.6	4.22358e-08	1.31873e-05	0.815325	0.148748	7.0482	0.155235	0.00625507	0.026934	0.0264781	0.026934
PDIA4	ENST00000652332.1	4.24829e-08	1.31873e-05	0.743736	0.135713	8.48216	0.152845	0.000423243	0.0197973	0.0272039	0.0272039
P3H3	ENST00000290510.10	4.61179e-08	1.42393e-05	1.91456	0.350289	5.78307	1.25802	0.0287686	0.155285	0.0423384	0.155285
FTH1	ENST00000530019.5	4.67361e-08	1.42953e-05	2.18655	0.400225	7.59907	1.18296	0.215379	-0.145752	0.0248908	0.0248908
MTHFD1L	ENST00000611279.4	4.78071e-08	1.45549e-05	5.64546	1.0341	3.51603	10.7306	1.31606	-0.345055	0.287989	0.287989
NEDD4L	ENST00000356462.10	4.85343e-08	1.47079e-05	5.31471	0.973997	2.9232	7.61815	0.9605	-0.622847	0.462506	0.462506
PTBP1	ENST00000356948.11	5.12511e-08	1.53887e-05	0.993643	0.182423	8.33182	0.265904	0.00295174	0.0469656	0.0263638	0.0469656
MZT2A	ENST00000309451.7	5.21779e-08	1.55955e-05	0.946015	0.173781	5.88385	0.236367	0.00525223	0.0388729	0.0400475	0.0400475
AHSA2P	ENST00000642732.1	5.47301e-08	1.61373e-05	4.91362	0.904034	3.15492	6.06547	0.838588	-0.116016	0.387329	0.387329
SBK1	ENST00000341901.5	5.83063e-08	1.68874e-05	1.01265	0.186701	7.31722	0.266182	0.000762976	0.0515231	0.0254076	0.0515231
LMNB2	ENST00000325327.4	5.88999e-08	1.69842e-05	0.844645	0.155778	7.85023	0.181968	0.000554154	0.035846	0.0249318	0.035846
RBP1	ENST00000232219.6	5.96241e-08	1.70517e-05	0.920796	0.169891	6.81401	0.23491	0.00549296	0.0378014	0.0279067	0.0378014
CSNK1A1	ENST00000523203.5	6.11453e-08	1.73472e-05	5.17194	0.95504	3.87952	7.6923	0.899548	0.468606	0.204038	0.468606
TSKU	ENST00000333090.5	6.40739e-08	1.79234e-05	1.11397	0.206022	6.93371	0.347048	0.00306237	0.060605	0.0271157	0.060605
TMEM184B	ENST00000361906.8	6.3901e-08	1.79234e-05	0.85729	0.158537	7.69801	0.214514	0.00342374	0.034277	0.0248507	0.034277
LIMA1	ENST00000552909.5	6.4486e-08	1.7962e-05	5.48252	1.01417	3.24448	9.2631	1.18214	-0.514927	0.360683	0.360683
MKNK2	ENST00000250896.7	6.55665e-08	1.81855e-05	1.47162	0.272376	7.09047	0.560196	0.0755099	0.0357731	0.0262709	0.0357731
RASSF7	ENST00000397582.7	6.59575e-08	1.82168e-05	0.972415	0.180015	5.96278	0.236498	0.010175	0.0282296	0.0384332	0.0384332
TMEM132A	ENST00000540112.1	6.79209e-08	1.85246e-05	1.73376	0.321269	4.89183	0.70704	0.0484204	0.1064	0.0794757	0.1064
CSNK1G2	ENST00000255641.13	6.75304e-08	1.85246e-05	0.72083	0.133546	7.30207	0.140199	0.00129919	0.0149947	0.0254526	0.0254526
CAPN15	ENST00000219611.7	7.15509e-08	1.92737e-05	0.840592	0.156034	6.32462	0.199216	0.00384666	0.0161257	0.0326733	0.0326733
CYTH2	ENST00000452733.7	7.50985e-08	2.01464e-05	0.752938	0.13999	6.91601	0.110876	0.00217107	0.00268918	0.0272246	0.0272246
RNPEP	ENST00000295640.9	7.69561e-08	2.05605e-05	0.727482	0.135368	7.35827	0.147142	0.00219182	0.0200328	0.0252947	0.0252947
RPL13	ENST00000565571.5	8.92226e-08	2.3361e-05	1.04198	0.194857	7.70566	0.361019	0.00129516	0.0556585	0.0248507	0.0556585
ACTN4	ENST00000497637.5	8.91839e-08	2.3361e-05	1.16253	0.217397	5.38099	0.331748	0.013605	0.0572872	0.05472	0.0572872
ACTN4	ENST00000635521.1	8.91839e-08	2.3361e-05	1.16253	0.217397	5.38099	0.331748	0.013605	0.0572872	0.05472	0.0572872
SMARCD2	ENST00000448276.6	9.1525e-08	2.38683e-05	1.48276	0.277525	6.197	0.63326	0.0211996	0.0943309	0.0344336	0.0943309
SRC	ENST00000373578.6	9.50654e-08	2.45956e-05	0.875125	0.164007	6.58599	0.259597	0.0105558	0.0139886	0.0297914	0.0297914
MXD4	ENST00000337190.7	1.02365e-07	2.60721e-05	0.717747	0.134852	7.45697	0.189626	0.000658925	0.0266187	0.0250762	0.0266187
RPL17-C18orf32	ENST00000332968.11	1.05492e-07	2.66895e-05	4.81401	0.905399	2.40731	5.44247	0.567292	-0.546954	0.66233	0.66233
MPG	ENST00000219431.4	1.15131e-07	2.87638e-05	4.27671	0.806765	2.16143	4.85098	0.200584	0.155915	0.775722	0.775722
MDFI	ENST00000230321.10	1.29636e-07	3.22646e-05	1.20835	0.228881	6.31998	0.437631	0.00559736	0.0729826	0.0327328	0.0729826
ITM2B	ENST00000378549.5	1.33044e-07	3.29872e-05	1.32276	0.250779	5.74075	0.415506	0.0509513	-0.0169087	0.0433841	0.0433841
NACAD	ENST00000490531.3	1.42813e-07	3.50116e-05	0.858948	0.163249	6.0185	0.201065	0.00259495	0.0255353	0.0373802	0.0373802
NAT14	ENST00000205194.5	1.43488e-07	3.50458e-05	0.76795	0.145978	6.58843	0.174578	0.00219594	0.0134559	0.0297684	0.0297684
CYP2S1	ENST00000310054.9	1.47277e-07	3.58377e-05	1.15346	0.219459	5.40904	0.492494	0.00597699	0.0662661	0.0536586	0.0662661
MAP2K2	ENST00000262948.9	1.5413e-07	3.71536e-05	0.725871	0.138326	7.38938	0.117477	0.00348312	0.00575348	0.0252178	0.0252178
WDR6	ENST00000452875.5	1.56425e-07	3.75059e-05	5.37044	1.02395	2.93902	7.51371	1.11562	-0.997894	0.457087	0.457087
DTX4	ENST00000227451.4	1.62901e-07	3.8634e-05	0.839655	0.160321	7.08472	0.205452	0.00119095	0.0373631	0.0262982	0.0373631
CHD3	ENST00000481999.1	1.64457e-07	3.87224e-05	1.4009	0.267573	5.08159	0.458006	0.0163552	0.0910374	0.0683276	0.0910374
OPA1	ENST00000475899.1	1.63974e-07	3.87224e-05	4.48426	0.856407	2.38356	5.34373	0.427439	-0.419144	0.67271	0.67271
MFSD12	ENST00000355415.7	1.68774e-07	3.93147e-05	0.777024	0.148548	6.47423	0.154856	0.00218253	0.0245543	0.0309171	0.0309171
MARCKSL1	ENST00000329421.8	1.68e-07	3.93147e-05	0.91456	0.174813	8.92633	0.226593	0.000157965	0.0456813	0.0309675	0.0456813
NCOR2	ENST00000404121.6	1.72707e-07	3.99465e-05	0.780914	0.149413	8.20305	0.205072	0.00768739	0.0199148	0.025799	0.025799
TCF7L1	ENST00000282111.4	1.80058e-07	4.15001e-05	0.704698	0.13503	7.06536	0.107622	0.000957466	0.00294328	0.0263921	0.0263921
YIF1A	ENST00000376901.9	2.04701e-07	4.66868e-05	0.698832	0.13452	7.10777	0.131958	0.000952997	0.0159124	0.0261904	0.0261904
UNC45A	ENST00000418476.2	2.06645e-07	4.69666e-05	0.7011	0.135002	7.13894	0.145538	0.00128677	0.017378	0.0260515	0.0260515
PTBP1	ENST00000349038.8	2.08645e-07	4.7257e-05	0.958727	0.184674	6.96286	0.244149	0.0242139	0.00463664	0.0269427	0.0269427
FOXA1	ENST00000545425.2	2.15835e-07	4.8717e-05	4.75997	0.917999	2.20213	5.319	0.508063	0.123026	0.75602	0.75602
BCL7C	ENST00000215115.4	2.24146e-07	5.04189e-05	0.800015	0.154499	6.29795	0.153573	0.00278531	0.0121577	0.0330198	0.0330198
TFPI2	ENST00000647793.1	2.42096e-07	5.35368e-05	4.86914	0.942953	3.7386	7.24095	0.810996	0.522744	0.234719	0.522744
AP000344.2	ENST00000512987.2	2.82922e-07	5.99328e-05	3.60771	0.702642	2.41426	3.80704	0.0812448	0.457662	0.659315	0.659315
CLSTN3	ENST00000266546.10	2.85863e-07	6.03605e-05	0.8758	0.170637	7.74971	0.215039	0.000897344	0.0427781	0.0248588	0.0427781
KHSRP	ENST00000594496.5	3.09367e-07	6.44912e-05	0.679646	0.132804	7.23454	0.128868	0.000780649	0.0205202	0.0256748	0.0256748
SRSF9	ENST00000229390.8	3.35016e-07	6.9177e-05	0.896727	0.175739	7.51332	0.218846	0.000815279	0.0455111	0.0249845	0.0455111
NYNRIN	ENST00000382554.4	3.46647e-07	7.08611e-05	1.30148	0.255386	7.94512	0.759788	0.000495856	0.097337	0.0250704	0.097337
TMEM160	ENST00000253047.7	3.47502e-07	7.08611e-05	1.03369	0.202857	5.3461	0.248135	0.00563934	0.0325407	0.0560871	0.0560871
C14orf132	ENST00000555004.2	3.54782e-07	7.2121e-05	0.799843	0.157086	6.58796	0.239925	0.00180062	0.0352135	0.0297728	0.0352135
NACA	ENST00000549855.5	3.96709e-07	7.96546e-05	1.03093	0.203318	5.9637	0.389645	0.0235602	0.0384473	0.0384152	0.0384473
TMEM132C	ENST00000435159.2	4.03312e-07	8.02419e-05	2.81832	0.556168	3.5214	1.96395	0.086422	0.377562	0.286661	0.377562
PPP1R14B	ENST00000309318.8	4.0555e-07	8.04277e-05	0.664904	0.13124	7.43022	0.099315	0.00070767	0.0210449	0.0251281	0.0251281
FBXL19	ENST00000338343.8	4.09674e-07	8.05287e-05	0.798205	0.157611	6.56359	0.216671	0.00725633	0.0115141	0.0300054	0.0300054
SHKBP1	ENST00000291842.10	4.09021e-07	8.05287e-05	0.8292	0.163721	6.82502	0.196255	0.00166684	0.0385401	0.0278284	0.0385401
CDK13	ENST00000340829.10	4.21105e-07	8.25277e-05	0.84509	0.167041	6.38219	0.239514	0.00989328	0.0278236	0.031961	0.031961
BDKRB2	ENST00000554311.1	4.34814e-07	8.49601e-05	1.80943	0.358086	4.70618	1.11659	0.0316603	0.160678	0.0926974	0.160678
FADS2	ENST00000278840.9	4.50654e-07	8.76624e-05	0.722368	0.143151	8.18186	0.125707	0.00252001	0.0282181	0.0257192	0.0282181
LRP3	ENST00000253193.9	4.69724e-07	9.09666e-05	0.865312	0.171747	6.01556	0.167607	0.00681157	0.028709	0.0374341	0.0374341
ULK1	ENST00000321867.6	4.72754e-07	9.12833e-05	0.656165	0.130268	7.60353	0.104128	0.000567085	0.0109874	0.0248874	0.0248874
PGAP6	ENST00000431232.7	4.84786e-07	9.2515e-05	0.675218	0.134178	7.32738	0.114428	0.00162728	0.0244632	0.0253785	0.0253785
TRO	ENST00000492706.5	4.84349e-07	9.2515e-05	1.43869	0.285885	5.36593	0.482007	0.0672915	0.00633979	0.0553037	0.0553037
MAGED4B	ENST00000470594.5	4.94e-07	9.39994e-05	1.44198	0.286754	4.92219	0.59613	0.0458005	0.0356308	0.0775417	0.0775417
GRSF1	ENST00000505068.5	5.05256e-07	9.58624e-05	1.05441	0.209863	5.68108	0.280078	0.0211131	0.0277492	0.0449503	0.0449503
NELFB	ENST00000343053.5	5.07083e-07	9.59311e-05	0.71173	0.141677	7.02457	0.147556	0.00350804	0.0237225	0.0266005	0.0266005
CDKN1C	ENST00000440480.7	5.201e-07	9.811e-05	2.46676	0.491509	6.17277	1.75903	0.327574	-0.0984639	0.0347985	0.0347985
OAF	ENST00000328965.9	5.40872e-07	0.000101444	1.58548	0.316387	5.31893	0.619089	0.00853238	0.141618	0.0571894	0.141618
LTBP4	ENST00000318809.11	5.48925e-07	0.00010266	4.87327	0.973026	2.44018	6.12026	0.77201	-0.00497078	0.648159	0.648159
HMCN1	ENST00000271588.9	5.57714e-07	0.000104007	0.774469	0.154729	6.26105	0.290748	0.0023944	0.0308359	0.0335174	0.0335174
SLC25A1	ENST00000215882.10	5.66002e-07	0.000105203	0.875213	0.174956	7.18229	0.217695	0.00339986	0.0425146	0.0258716	0.0425146
GNAO1	ENST00000262494.12	5.98291e-07	0.000110007	1.25445	0.251304	4.91779	0.366415	0.0133882	0.081342	0.0778181	0.081342
TCF21	ENST00000367882.4	6.12359e-07	0.000111931	5.01558	1.00567	3.42148	7.98819	0.138039	1.37903	0.311941	1.37903
UBE2S	ENST00000589978.1	6.18382e-07	0.000112437	1.01629	0.203853	5.64678	0.303329	0.00828717	0.0540472	0.045902	0.0540472
SNX33	ENST00000308527.5	6.36752e-07	0.000114505	0.731168	0.146829	6.88324	0.196139	0.00169184	0.0306463	0.0274334	0.0306463
EIF3F	ENST00000528653.1	6.64188e-07	0.000118141	1.25075	0.25158	4.92924	0.446373	0.0178379	0.00646365	0.0771012	0.0771012
NA	ENST00000626931.1	6.64188e-07	0.000118141	1.25075	0.25158	4.92924	0.446373	0.0178379	0.00646365	0.0771012	0.0771012
CHPF	ENST00000243776.11	6.74022e-07	0.000119242	1.06305	0.213948	8.43829	0.368644	0.00136049	0.0673004	0.0269379	0.0673004
HMG20B	ENST00000333651.11	7.12679e-07	0.000125067	0.685161	0.138197	7.04686	0.145769	0.00106	0.0275874	0.0264849	0.0275874
SCRIB	ENST00000526832.5	7.19882e-07	0.000125657	4.31499	0.870673	2.62925	4.35299	0.56644	0.286259	0.570668	0.570668
SCRIB	ENST00000634208.1	7.19882e-07	0.000125657	4.31499	0.870673	2.62925	4.35299	0.56644	0.286259	0.570668	0.570668
MVB12A	ENST00000317040.12	7.41154e-07	0.000128005	0.847287	0.17116	6.06567	0.222488	0.00740281	0.00291051	0.0365409	0.0365409
CTDNEP1	ENST00000318988.10	7.45626e-07	0.000128117	0.764932	0.15456	6.89493	0.167394	0.00847548	0.00712983	0.0273578	0.0273578
MGAT1	ENST00000307826.4	7.45719e-07	0.000128117	0.985414	0.199111	7.03553	0.293846	0.00668147	0.0527865	0.0265431	0.0527865
RAB4A	ENST00000481981.1	7.93639e-07	0.000134159	3.9714	0.804427	2.89221	4.58033	0.335195	0.635461	0.473241	0.635461
RRBP1	ENST00000377813.5	7.96803e-07	0.000134159	1.01979	0.206596	7.43477	0.408372	0.0156417	0.0483814	0.0251189	0.0483814
STIMATE	ENST00000355083.10	7.97282e-07	0.000134159	0.760672	0.154106	6.29003	0.153346	0.00249818	0.0146443	0.0331248	0.0331248
PPP1R9B	ENST00000612501.2	8.15597e-07	0.000136888	0.811184	0.164487	7.68181	0.209216	0.0004912	0.0400928	0.0248523	0.0400928
PXDN	ENST00000252804.9	8.63705e-07	0.000142978	1.10104	0.223771	9.12918	0.421174	0.000161971	0.0749485	0.033431	0.0749485
AGPAT2	ENST00000371696.7	8.64986e-07	0.000142978	1.06156	0.21576	6.77097	0.299054	0.00323044	0.0665984	0.0282234	0.0665984
RNA5-8SP6	ENST00000515896.1	8.80264e-07	0.000144773	1.47761	0.300531	7.02476	0.634609	0.00133804	0.13414	0.0265995	0.13414
GGCX	ENST00000233838.9	9.17485e-07	0.000149765	0.702298	0.143076	6.74439	0.181204	0.00227838	0.0269897	0.0284279	0.0284279
SF3A2	ENST00000221494.10	9.33026e-07	0.000151546	0.637331	0.129928	7.7196	0.103982	0.000470195	0.00591032	0.0248517	0.0248517
MARCHF9	ENST00000266643.6	9.43888e-07	0.000152515	0.863159	0.176048	5.85785	0.185542	0.00587624	0.00692681	0.0406129	0.0406129
SMARCE1	ENST00000582955.6	1.08304e-06	0.000171377	5.01092	1.02769	2.90856	7.42658	1.11665	-1.09695	0.46756	0.46756
MAGED4B	ENST00000335504.9	1.08702e-06	0.000171377	0.815917	0.167361	6.81949	0.224073	0.00511961	0.036895	0.0278676	0.036895
MAGED4	ENST00000471932.5	1.08702e-06	0.000171377	0.815917	0.167361	6.81949	0.224073	0.00511961	0.036895	0.0278676	0.036895
YIPF2	ENST00000253031.6	1.12827e-06	0.000176682	0.8217	0.168802	6.8039	0.224316	0.00707755	0.0356635	0.0279795	0.0356635
EGFL7	ENST00000371698.3	1.15742e-06	0.000180814	1.19331	0.245396	5.86812	0.418716	0.00520325	0.0851257	0.0403874	0.0851257
ADAMTSL2	ENST00000393060.1	1.19144e-06	0.000184807	5.65612	1.16452	2.73135	7.90882	1.50266	-0.0226944	0.531486	0.531486
H2AX	ENST00000530167.1	1.24952e-06	0.0001929	1.05757	0.218163	6.86309	0.274431	0.00190064	0.0694922	0.0275666	0.0694922
COL27A1	ENST00000356083.8	1.24789e-06	0.0001929	1.11741	0.230494	6.92443	0.344245	0.00200527	0.0776861	0.0271725	0.0776861
P3H3	ENST00000612048.4	1.2539e-06	0.000193121	1.76307	0.36375	5.97181	1.01054	0.0210266	0.177444	0.0382579	0.177444
NR2F6	ENST00000291442.3	1.27114e-06	0.00019486	0.71177	0.146932	7.44289	0.130076	0.000760194	0.0316233	0.0251028	0.0316233
PLXNB1	ENST00000485535.5	1.28398e-06	0.000195454	0.927719	0.19159	5.86616	0.199362	0.0146296	0.00904937	0.0404303	0.0404303
CYBA	ENST00000261623.8	1.31914e-06	0.000199656	0.965782	0.199672	7.22547	0.248828	0.000914441	0.0588888	0.0257074	0.0588888
TNNT1	ENST00000593046.5	1.32073e-06	0.000199656	3.95189	0.817078	2.21071	5.03253	0.249511	-0.0268854	0.751913	0.751913
GLMP	ENST00000362007.6	1.32717e-06	0.000200148	0.750156	0.155131	6.57559	0.16054	0.00620823	0.0115546	0.0298901	0.0298901
SERF2	ENST00000339624.9	1.36851e-06	0.000204201	0.647437	0.134058	7.42369	0.12591	0.00181569	0.0170404	0.0251416	0.0251416
PDLIM7	ENST00000486828.6	1.38263e-06	0.000204758	1.355	0.280684	5.54568	0.434841	0.0294485	0.0887266	0.0489419	0.0887266
HMG20B	ENST00000488973.6	1.38577e-06	0.000204759	1.50428	0.311636	4.70593	0.444391	0.0529591	-0.0410671	0.0927167	0.0927167
RABAC1	ENST00000222008.11	1.39473e-06	0.000205342	0.688916	0.142758	7.04236	0.146144	0.00107453	0.0294953	0.0265079	0.0294953
DPYSL2	ENST00000523027.1	1.40226e-06	0.000205342	4.63573	0.960836	3.46516	6.2551	1.08411	-0.651307	0.300703	0.300703
EFS	ENST00000216733.8	1.47985e-06	0.000215258	2.25475	0.468379	5.10003	1.83729	0.0966608	0.232407	0.0673576	0.232407
JUND	ENST00000252818.4	1.5192e-06	0.000220493	0.700326	0.145637	8.09295	0.129688	0.000333974	0.0314814	0.0254239	0.0314814
SPARC	ENST00000521327.1	1.64437e-06	0.000235526	1.77588	0.370527	6.56912	1.04624	0.0047653	0.20117	0.029952	0.20117
ARFGAP1	ENST00000395285.3	1.67942e-06	0.000239109	1.35803	0.283596	4.91783	0.447833	0.0403215	0.0803186	0.0778159	0.0803186
CDC42EP5	ENST00000619217.1	1.68034e-06	0.000239109	5.78273	1.20763	3.19805	8.5601	1.81323	-1.43032	0.374328	0.374328
PABPN1	ENST00000397276.6	1.69901e-06	0.000241241	0.69919	0.146082	6.74664	0.118222	0.00359975	0.0166883	0.0284103	0.0284103
PTBP1	ENST00000586944.5	1.7085e-06	0.000242063	1.29401	0.270421	4.7516	0.383578	0.0204618	0.0618542	0.0892295	0.0892295
LIMK1	ENST00000336180.7	1.73228e-06	0.000244902	0.95591	0.199881	7.26276	0.267215	0.00171888	0.05821	0.0255776	0.05821
SEMA3F	ENST00000002829.8	1.7567e-06	0.00024782	2.13797	0.447314	5.66691	1.4908	0.234522	0.0656117	0.0453388	0.0656117
CARM1	ENST00000344150.8	1.76834e-06	0.000248926	1.65121	0.34557	6.71654	0.728517	0.150478	-0.0153342	0.0286493	0.0286493
PCBP2	ENST00000359282.9	1.81795e-06	0.000254269	0.803255	0.168303	7.25547	0.243391	0.0137901	0.0286987	0.0256021	0.0286987
MRPL34	ENST00000594999.1	1.83283e-06	0.000255804	4.41841	0.92609	3.26397	5.50281	0.269143	1.01732	0.355061	1.01732
CELSR3	ENST00000164024.5	1.92479e-06	0.000268066	0.911162	0.191374	6.02314	0.336981	0.00404479	0.0508911	0.0372957	0.0508911
ZNF467	ENST00000302017.4	1.93722e-06	0.000269225	1.17848	0.247586	5.46634	0.447967	0.00687909	0.0850693	0.051591	0.0850693
AP2B1	ENST00000621914.4	1.97607e-06	0.000272885	0.757911	0.159364	8.08238	0.166592	0.0127022	0.0241463	0.025393	0.025393
GMDS	ENST00000380815.5	1.98545e-06	0.000273604	1.32461	0.278578	5.11902	0.444797	0.0500304	0.0100817	0.066378	0.066378
SFRP5	ENST00000266066.4	2.13905e-06	0.0002917	1.15993	0.244719	7.57319	0.455056	0.000630869	0.0892004	0.0249133	0.0892004
ST3GAL5	ENST00000393808.8	2.23282e-06	0.00030197	1.88109	0.397599	5.74501	1.08096	0.193851	-0.0568094	0.0432765	0.0432765
TPGS2	ENST00000614939.4	2.51502e-06	0.000331238	4.07139	0.864982	2.8493	4.64018	0.633924	0.187826	0.488366	0.488366
USP5	ENST00000389231.9	2.63362e-06	0.000344089	0.833893	0.177518	7.2479	0.20615	0.0098964	0.0373728	0.025628	0.0373728
MEIS3	ENST00000331559.9	2.662e-06	0.000347105	1.61282	0.343495	5.79448	0.933028	0.0178098	0.159173	0.0420652	0.159173
PRKCSH	ENST00000592741.5	2.73387e-06	0.000355061	0.705248	0.150377	7.34105	0.138625	0.00857941	0.0193775	0.0253405	0.0253405
IGLON5	ENST00000270642.8	2.84438e-06	0.000367954	2.28724	0.488545	5.7373	2.00619	0.00992822	0.348086	0.0434717	0.348086
FGFR3	ENST00000260795.7	2.8717e-06	0.000370026	5.10694	1.09128	2.94148	8.85994	0.898037	0.888285	0.456249	0.888285
NA	ENST00000619580.4	2.86956e-06	0.000370026	0.863351	0.184479	7.8437	0.232573	0.00571482	0.0453339	0.0249247	0.0453339
PIP4K2A	ENST00000323883.11	2.95462e-06	0.000378475	4.83118	1.03364	2.2918	5.69284	0.888688	0.00377307	0.713928	0.713928
PDCD2	ENST00000614056.4	2.96343e-06	0.000378861	5.36054	1.14705	2.85136	7.11244	1.48595	-1.42715	0.48763	0.48763
TBC1D9B	ENST00000355235.7	2.99028e-06	0.000380807	0.68324	0.146258	7.0462	0.160667	0.00559865	0.0157227	0.0264882	0.0264882
TBC1D9B	ENST00000639711.1	2.99028e-06	0.000380807	0.68324	0.146258	7.0462	0.160667	0.00559865	0.0157227	0.0264882	0.0264882
MTA2	ENST00000278823.7	3.06668e-06	0.000386774	0.639084	0.136957	7.72838	0.106111	0.00328283	0.013279	0.0248531	0.0248531
KLF16	ENST00000250916.6	3.22166e-06	0.000403962	0.666556	0.143156	6.65537	0.125067	0.00157759	0.0215423	0.0291628	0.0291628
ABHD8	ENST00000247706.4	3.22765e-06	0.000403962	0.740923	0.159141	6.13154	0.162904	0.00254497	0.0339883	0.0354437	0.0354437
MIDN	ENST00000591446.6	3.31279e-06	0.000413039	1.40362	0.301828	7.10979	0.564553	0.110469	-0.0759584	0.0261811	0.0261811
SHC2	ENST00000264554.10	3.38338e-06	0.000421038	0.643073	0.138413	6.92013	0.108557	0.00153806	0.0161159	0.027199	0.027199
FHOD1	ENST00000258201.9	3.60318e-06	0.000443624	1.09488	0.23632	5.68679	0.395537	0.00762335	0.0761471	0.0447957	0.0761471
NSMF	ENST00000265663.12	3.67689e-06	0.000449866	0.635383	0.137266	7.19129	0.0955701	0.00242666	0.00784243	0.0258361	0.0258361
IGFBP3	ENST00000275521.10	3.68799e-06	0.000450382	1.61621	0.349207	7.78434	0.97455	0.00666825	0.17625	0.0248754	0.17625
SH3GL1	ENST00000269886.7	3.75767e-06	0.000457186	0.60954	0.131811	7.9159	0.121556	0.000454635	0.0256065	0.0250204	0.0256065
UNC93B1	ENST00000227471.7	3.99049e-06	0.000478398	1.07167	0.232371	5.3179	0.329624	0.00761735	0.0733769	0.0572317	0.0733769
MAGED4	ENST00000477634.5	3.98997e-06	0.000478398	1.52467	0.330594	4.43886	0.651755	0.0472772	0.0250278	0.116662	0.116662
SIPA1	ENST00000534313.6	4.02752e-06	0.000481955	1.03031	0.223497	5.58288	0.323205	0.0271457	0.0313558	0.047781	0.047781
TMEM9	ENST00000367334.9	4.10393e-06	0.000489309	0.632771	0.137378	7.21714	0.11735	0.00257124	0.0217085	0.0257379	0.0257379
PDE4DIP	ENST00000533845.1	4.13804e-06	0.000491585	3.87551	0.84171	2.36212	4.29447	0.380537	0.124345	0.682176	0.682176
NME1-NME2	ENST00000393193.6	4.27391e-06	0.000504977	1.1928	0.25944	5.42374	0.376053	0.0478482	-0.0219172	0.0531152	0.0531152
ARFGAP1	ENST00000518794.6	4.32045e-06	0.000509556	1.20146	0.261451	5.27571	0.373352	0.0284428	0.0740922	0.059011	0.0740922
FADS2	ENST00000257261.10	4.3596e-06	0.000512327	0.901922	0.196349	6.87387	0.223834	0.0303346	0.000443789	0.0274949	0.0274949
BOK	ENST00000318407.5	4.35937e-06	0.000512327	0.871705	0.189771	7.12863	0.206199	0.000964981	0.0530543	0.0260966	0.0530543
HS1BP3	ENST00000304031.8	4.38918e-06	0.000514197	0.767083	0.167046	5.95953	0.160031	0.00335968	0.0241193	0.0384968	0.0384968
GATA4	ENST00000647274.1	4.39122e-06	0.000514197	1.02998	0.224301	7.06308	0.375321	0.0490628	0.00167657	0.0264034	0.0264034
CNOT9	ENST00000418808.1	4.45181e-06	0.000519543	4.33487	0.944604	2.20393	4.75689	0.583257	-0.535637	0.755159	0.755159
ZNF875	ENST00000544914.5	4.48109e-06	0.000520993	4.99235	1.0882	2.63848	6.31338	1.20921	-1.1162	0.567053	0.567053
TNKS1BP1	ENST00000427750.2	4.51102e-06	0.000523542	2.37494	0.51783	4.21354	1.16866	0.257343	-0.135441	0.144879	0.144879
PCED1A	ENST00000360652.7	4.55585e-06	0.00052781	0.813905	0.177543	6.04642	0.180741	0.00354131	0.0437411	0.036878	0.0437411
MPG	ENST00000356432.7	4.5747e-06	0.000528533	0.858675	0.187344	6.11546	0.235438	0.0169431	0.0287508	0.0357038	0.0357038
PAQR6	ENST00000335852.6	4.61007e-06	0.00053051	4.22712	0.92259	3.00604	4.80868	0.842159	0.397643	0.434599	0.434599
MRPS34	ENST00000397375.6	4.74734e-06	0.000543264	0.74042	0.161817	6.33225	0.162611	0.00670115	0.0166539	0.0325761	0.0325761
MAP4K4	ENST00000456652.5	4.86374e-06	0.000554644	5.50969	1.20547	4.36795	8.92308	1.06574	1.11399	0.124539	1.11399
ARHGEF18	ENST00000594665.1	5.01751e-06	0.000570194	0.973881	0.213381	6.68438	0.241853	0.00573233	0.0625647	0.0289147	0.0625647
SFRP2	ENST00000274063.5	5.05818e-06	0.000571836	2.57705	0.56485	5.87159	2.2096	0.00817709	0.470407	0.0403119	0.470407
BTBD2	ENST00000255608.8	5.19008e-06	0.000583823	0.594132	0.130379	7.61708	0.0999755	0.000620092	0.0163595	0.024878	0.024878
BAZ2A	ENST00000549787.5	5.24106e-06	0.000587438	5.25548	1.15381	2.54527	6.21782	1.39264	-1.126	0.604266	0.604266
SMO	ENST00000249373.8	5.24002e-06	0.000587438	0.598474	0.13139	7.42991	0.131205	0.000766288	0.0244247	0.0251287	0.0251287
OGFR	ENST00000290291.10	5.33975e-06	0.000596458	0.619931	0.136219	6.97786	0.124184	0.000977136	0.00859435	0.0268564	0.0268564
MEX3D	ENST00000605173.2	5.43828e-06	0.000603344	0.901076	0.198164	5.93822	0.226469	0.0199837	0.0295337	0.0389196	0.0389196
MAN1B1	ENST00000371589.9	5.43093e-06	0.000603344	0.623681	0.137151	7.40493	0.123334	0.00248697	0.0257285	0.0251821	0.0257285
QPRT	ENST00000449759.1	5.56977e-06	0.000615916	1.34732	0.296629	4.58677	0.504698	0.029383	0.00911119	0.1026	0.1026
SPINT2	ENST00000301244.12	5.77004e-06	0.000634772	0.93911	0.207097	8.32877	0.245065	0.000863858	0.0634697	0.0263488	0.0634697
TMEM219	ENST00000566848.5	5.93668e-06	0.000649326	1.01337	0.223769	5.27479	0.308258	0.0160584	0.0461548	0.0590507	0.0590507
C1QBP	ENST00000225698.8	6.02497e-06	0.000655607	0.70228	0.155182	6.71493	0.156339	0.00468165	0.0314407	0.0286624	0.0314407
SSBP4	ENST00000593641.3	6.08221e-06	0.000659523	0.934602	0.20661	5.47505	0.231975	0.0127429	0.00555496	0.0512885	0.0512885
MAP3K1	ENST00000399503.4	6.1085e-06	0.000659809	0.611884	0.135295	7.24288	0.118071	0.000759564	0.0266975	0.0256455	0.0266975
LMF1	ENST00000568897.5	6.13958e-06	0.000660984	4.41548	0.976546	2.81794	4.95343	0.930853	-0.467133	0.49961	0.49961
EFNA4	ENST00000368409.8	6.17768e-06	0.000663994	0.835049	0.184737	5.75713	0.16644	0.0082183	-0.0012763	0.0429731	0.0429731
MEGF6	ENST00000294599.8	6.21678e-06	0.000667101	1.78972	0.396054	5.47221	1.04982	0.0584692	0.176819	0.0513867	0.176819
IGFBP3	ENST00000613132.4	6.2664e-06	0.000670228	1.4231	0.31504	8.69486	0.715381	0.00906174	0.139814	0.0287513	0.139814
PAK1	ENST00000356341.7	6.37191e-06	0.000680401	0.650882	0.144203	6.94538	0.110594	0.00414613	0.0106642	0.0270456	0.0270456
CAPN5	ENST00000648180.1	6.40854e-06	0.00068098	1.15484	0.255924	5.35491	0.415025	0.00834488	0.0899006	0.0557371	0.0899006
NA	ENST00000278559.8	6.40854e-06	0.00068098	1.15484	0.255924	5.35491	0.415025	0.00834488	0.0899006	0.0557371	0.0899006
ZDHHC8	ENST00000320602.11	6.51946e-06	0.000690525	0.66621	0.147758	6.56919	0.115357	0.00279717	0.0174141	0.0299513	0.0299513
NAGLU	ENST00000225927.7	6.70476e-06	0.00070672	0.734207	0.163054	6.06212	0.141444	0.00327721	0.0042495	0.0366026	0.0366026
CUL7	ENST00000535468.1	6.70194e-06	0.00070672	0.816616	0.181352	6.37841	0.219807	0.0166959	0.0326367	0.0320063	0.0326367
FAAP20	ENST00000378546.9	6.75178e-06	0.000709392	0.738561	0.164075	6.11558	0.150176	0.00467899	0.025627	0.0357018	0.0357018
BEX3	ENST00000361298.8	6.8e-06	0.000713314	0.655143	0.145592	7.13529	0.140781	0.0057282	0.0260433	0.0260674	0.0260674
FBLN1	ENST00000262722.11	7.14715e-06	0.00073907	1.94784	0.433889	8.04201	1.12003	0.000961895	0.281428	0.0252829	0.281428
LOXL3	ENST00000393937.6	7.18254e-06	0.000741558	4.39694	0.979666	3.29535	5.72967	0.373298	1.06632	0.346142	1.06632
CDR2L	ENST00000337231.5	7.20097e-06	0.00074229	0.932798	0.207858	6.69454	0.244868	0.00156758	0.0632401	0.0288298	0.0632401
ADCK2	ENST00000072869.9	7.32642e-06	0.000754034	0.799884	0.178387	5.86911	0.190797	0.00736699	0.0312168	0.040366	0.040366
GLIS2	ENST00000433375.1	7.47395e-06	0.000767682	0.814151	0.181741	6.65528	0.186578	0.0110273	0.0385176	0.0291636	0.0385176
CAPZB	ENST00000264202.8	7.48249e-06	0.000767682	0.848211	0.189355	8.21376	0.204084	0.000994965	0.0527878	0.0258407	0.0527878
TTC3	ENST00000428693.1	7.52355e-06	0.000769482	4.24896	0.948787	4.67471	5.54717	1.2551	-0.0452008	0.0951942	0.0951942
SHISA5	ENST00000426002.5	7.55226e-06	0.000770167	0.588647	0.131468	7.83953	0.10391	0.00100531	0.0229152	0.0249204	0.0249204
FES	ENST00000328850.8	7.7002e-06	0.000783875	4.12925	0.923077	2.08785	4.70523	0.465885	0.00549616	0.812221	0.812221
PTMS	ENST00000309083.7	7.71365e-06	0.000784026	1.16606	0.260689	6.62314	0.363536	0.0724893	0.0183091	0.0294485	0.0294485
PCDHB2	ENST00000622947.1	7.8791e-06	0.000797128	1.45606	0.325854	5.48444	0.549776	0.108306	-0.0510015	0.0509653	0.0509653
PKD1P1	ENST00000458669.1	7.91918e-06	0.00079937	0.704634	0.157729	6.66658	0.131984	0.00825192	0.0225048	0.0290659	0.0290659
CPNE1	ENST00000397443.6	8.30999e-06	0.000835556	0.708666	0.158999	7.42647	0.173904	0.00605639	0.0318648	0.0251358	0.0318648
LETMD1	ENST00000550100.5	8.91528e-06	0.000888231	4.71379	1.0612	2.65318	6.40849	1.1279	-1.07513	0.561326	0.561326
TCF3	ENST00000590684.5	9.16986e-06	0.000905327	0.842892	0.190017	5.99523	0.184604	0.0163481	0.0325201	0.0378117	0.0378117
ACSS3	ENST00000261206.7	9.19898e-06	0.000905504	0.844422	0.190391	5.64671	0.247547	0.00846919	0.0449386	0.045904	0.045904
OBSL1	ENST00000373873.8	9.19932e-06	0.000905504	1.16628	0.262961	6.31031	0.631356	0.0307716	0.0729513	0.0328579	0.0729513
COL3A1	ENST00000304636.7	9.25418e-06	0.000909536	2.43308	0.548745	10.8301	2.56792	0.000184047	0.451497	0.0886298	0.451497
BMP1	ENST00000520626.6	9.42002e-06	0.000923063	1.37252	0.309819	5.92032	0.502071	0.060328	0.0836536	0.0392832	0.0836536
G6PD	ENST00000393562.8	9.61648e-06	0.000939501	1.0694	0.241638	6.11613	0.329649	0.0118736	0.0757095	0.0356929	0.0757095
RHBDF1	ENST00000262316.10	9.79694e-06	0.000951451	0.961931	0.217552	6.44532	0.25861	0.016114	0.0548795	0.031233	0.0548795
SEMA6A	ENST00000343348.10	9.85851e-06	0.000954598	0.620556	0.140389	7.36136	0.143388	0.00178552	0.0277781	0.0252868	0.0277781
MAP1S	ENST00000324096.9	1.0076e-05	0.000969466	0.593132	0.134328	7.16537	0.0964994	0.00112613	0.0055999	0.02594	0.02594
ARSI	ENST00000328668.8	1.00861e-05	0.000969466	2.38998	0.541292	5.29348	2.13507	0.0243888	0.415107	0.0582518	0.415107
DHRSX	ENST00000412516.7	1.03054e-05	0.000987645	4.14392	0.939522	2.00947	4.18959	0.471672	-0.371764	0.852381	0.852381
MEN1	ENST00000312049.10	1.03967e-05	0.000994932	0.799275	0.181293	6.48023	0.180129	0.00931349	0.0399871	0.0308528	0.0399871
PTBP1	ENST00000585932.5	1.04346e-05	0.000997102	4.18186	0.948704	3.2751	5.63002	0.715084	0.634975	0.35188	0.634975
EVX1	ENST00000496902.7	1.06746e-05	0.00101855	3.75758	0.853405	1.69346	3.71994	0.0642393	0.592204	1.02821	1.02821
PRKCSH	ENST00000591462.5	1.10433e-05	0.00104494	0.611295	0.139068	7.56012	0.137711	0.0040832	0.0240563	0.0249265	0.0249265
UBE2D2	ENST00000505007.5	1.10469e-05	0.00104494	1.18534	0.269666	4.91966	0.408791	0.031379	0.0155545	0.0777005	0.0777005
TNC	ENST00000341037.8	1.11076e-05	0.00104766	1.97059	0.448433	8.06867	1.25838	0.00705915	0.294579	0.0253541	0.294579
ZMYND8	ENST00000467200.6	1.12185e-05	0.00105264	5.49707	1.25154	2.78105	7.79999	1.83649	-0.547554	0.513043	0.513043
SPPL2A	ENST00000560288.1	1.12859e-05	0.00105685	3.80469	0.866485	2.569	3.89419	0.531554	0.258119	0.594642	0.594642
LRCH4	ENST00000310300.11	1.16013e-05	0.00108174	0.648784	0.147957	6.93863	0.123952	0.00359913	0.0292378	0.027086	0.0292378
EIF4E2	ENST00000258416.8	1.16391e-05	0.00108373	0.618286	0.141025	6.97814	0.115934	0.00171485	0.0281171	0.0268548	0.0281171
RPS2	ENST00000533161.5	1.16998e-05	0.00108629	0.875418	0.199725	5.81512	0.224977	0.0151966	0.0446388	0.0415801	0.0446388
ARFGAP1	ENST00000370283.9	1.25469e-05	0.00115837	0.854265	0.19558	7.31772	0.235991	0.00284501	0.0545321	0.0254062	0.0545321
PCNX3	ENST00000439247.2	1.25877e-05	0.00115925	0.748422	0.171375	6.13067	0.136898	0.0085967	0.0198328	0.0354575	0.0354575
EMP1	ENST00000431267.2	1.26003e-05	0.00115925	4.31554	0.988231	2.42839	4.9276	0.811683	-0.390982	0.653217	0.653217
TRIM62	ENST00000291416.10	1.26329e-05	0.00115976	0.806332	0.184669	5.64133	0.179075	0.00509725	0.027128	0.0460566	0.0460566
CYP26B1	ENST00000001146.6	1.27014e-05	0.00116442	1.96002	0.449013	6.17943	1.18009	0.0294403	0.272978	0.0346973	0.272978
QSER1	ENST00000650167.1	1.28965e-05	0.00117261	1.42314	0.32627	5.96264	0.548808	0.121242	0.0227682	0.0384361	0.0384361
FZR1	ENST00000441788.6	1.29897e-05	0.0011744	0.630825	0.144675	6.8279	0.0922561	0.00358828	0.0113809	0.0278082	0.0278082
KCND1	ENST00000218176.4	1.29718e-05	0.0011744	1.82461	0.418433	4.2811	1.2855	0.0819274	0.180702	0.135435	0.180702
LRP5	ENST00000294304.12	1.31508e-05	0.00118733	0.795066	0.182456	7.53047	0.177835	0.000601837	0.0493333	0.0249614	0.0493333
MERTK	ENST00000421804.6	1.32628e-05	0.00119579	0.963706	0.22125	5.51706	0.361733	0.0235577	0.0289788	0.0498699	0.0498699
GNAI2	ENST00000313601.11	1.33345e-05	0.0011973	0.617144	0.141724	8.8002	0.118935	0.000168664	0.02996	0.0296866	0.02996
FOXP4	ENST00000373063.7	1.33729e-05	0.00119911	0.667745	0.153367	6.54315	0.113204	0.00507644	0.0227581	0.0302056	0.0302056
SLC25A29	ENST00000359232.8	1.38743e-05	0.00123226	0.806584	0.185599	5.99914	0.166128	0.013932	0.0288236	0.0377385	0.0377385
TNK2	ENST00000333602.12	1.38208e-05	0.00123226	0.744213	0.171214	6.70562	0.156419	0.00666002	0.0373112	0.0287383	0.0373112
SERP1	ENST00000487153.1	1.39661e-05	0.00123705	4.46973	1.02885	2.21246	5.27543	0.836723	-0.147122	0.751076	0.751076
SIDT2	ENST00000324225.8	1.42801e-05	0.00125954	0.669819	0.154354	6.68928	0.141242	0.00686395	0.0142154	0.0288737	0.0288737
TRAF4	ENST00000262395.10	1.42872e-05	0.00125954	0.717319	0.165304	7.42137	0.141367	0.000991874	0.039996	0.0251464	0.039996
PDGFC	ENST00000502773.6	1.47398e-05	0.00128987	1.15187	0.265866	6.45929	0.377769	0.00684951	0.0991775	0.0310789	0.0991775
CENPV	ENST00000299736.5	1.49207e-05	0.00130222	1.12087	0.258871	4.87735	0.309434	0.020102	0.0512363	0.0804192	0.0804192
SYNGAP1	ENST00000355818.3	1.51247e-05	0.00131651	3.94159	0.910958	2.00746	4.22365	0.391339	-0.241736	0.853427	0.853427
MMP24OS	ENST00000424358.1	1.52738e-05	0.00132773	0.695569	0.160836	6.19422	0.154535	0.00432749	0.018578	0.034475	0.034475
SOCS1	ENST00000332029.2	1.53097e-05	0.00132908	2.49024	0.575887	3.96831	1.66962	0.0626242	0.434845	0.186339	0.434845
ITGA7	ENST00000557555.2	1.53656e-05	0.00133217	4.51694	1.04477	1.6578	5.07274	0.330106	1.30721	1.04953	1.30721
LEPROT	ENST00000488747.5	1.53926e-05	0.00133275	4.2145	0.974903	2.04697	4.28786	0.59265	-0.51754	0.833005	0.833005
TP53I11	ENST00000525680.5	1.55633e-05	0.0013422	0.949079	0.219666	6.39959	0.242677	0.0406246	0.0109858	0.0317549	0.0317549
NACA	ENST00000546862.5	1.57018e-05	0.00134881	0.722792	0.167367	7.15585	0.166566	0.00407424	0.0379433	0.0259795	0.0379433
LAMA5	ENST00000370691.6	1.57645e-05	0.00135242	1.42183	0.329301	6.10987	0.505488	0.108326	0.0543329	0.0357953	0.0543329
EIF4G1	ENST00000475721.5	1.61279e-05	0.00137818	5.46449	1.26707	3.27708	6.99161	2.05689	-0.464185	0.351316	0.351316
FOXP4	ENST00000409208.5	1.611e-05	0.00137818	1.00258	0.232459	6.09294	0.295973	0.036265	0.0447907	0.0360763	0.0447907
PTMA	ENST00000409683.5	1.62747e-05	0.00138891	5.8942	1.36734	4.75519	10.2159	0.233524	2.57092	0.0889617	2.57092
BCL2L12	ENST00000246784.7	1.63538e-05	0.00139261	0.962123	0.22325	5.31895	0.226768	0.0175726	0.0507513	0.0571885	0.0571885
SLC35C1	ENST00000314134.3	1.65556e-05	0.00140555	0.61111	0.141891	6.7509	0.131135	0.00182238	0.0276776	0.0283771	0.0283771
SLC45A1	ENST00000289877.8	1.65948e-05	0.00140706	3.98539	0.925462	2.50719	4.4312	0.664797	-0.0867799	0.619924	0.619924
LRP1	ENST00000556356.1	1.70447e-05	0.00143337	2.46089	0.572239	5.39903	1.51416	0.193918	0.297267	0.0540335	0.297267
SH3GLB2	ENST00000479237.5	1.70427e-05	0.00143337	1.12952	0.262649	5.3058	0.318084	0.0137355	0.0897416	0.0577336	0.0897416
TMEM214	ENST00000238788.14	1.73219e-05	0.00144753	0.664319	0.154605	7.71765	0.157377	0.000581327	0.0352727	0.0248515	0.0352727
MRPL40	ENST00000471259.1	1.72923e-05	0.00144753	3.73725	0.869682	2.54001	3.91666	0.528107	0.166563	0.606413	0.606413
TKT	ENST00000423516.5	1.73029e-05	0.00144753	0.857794	0.19962	7.36083	0.208506	0.00346828	0.0563042	0.0252881	0.0563042
CTBP2	ENST00000531469.5	1.74262e-05	0.00145308	0.671197	0.156254	6.79362	0.105772	0.00856852	0.0142406	0.0280545	0.0280545
MFAP2	ENST00000375534.7	1.77247e-05	0.00147609	1.32047	0.307674	7.08027	0.60122	0.00599547	0.136	0.0263195	0.136
SPINDOC	ENST00000294244.9	1.78516e-05	0.00148289	0.587888	0.137031	6.93096	0.0839558	0.0010336	0.00683566	0.0271325	0.0271325
MAZ	ENST00000545521.5	1.79912e-05	0.00148881	0.667618	0.155678	7.61357	0.13182	0.0062119	0.0301414	0.0248803	0.0301414
ERI3	ENST00000456170.6	1.79758e-05	0.00148881	5.1125	1.1921	2.93827	6.51056	1.6743	-1.20137	0.457346	0.457346
MIER2	ENST00000619835.4	1.80399e-05	0.00149095	0.714069	0.166532	6.00748	0.149884	0.00401636	0.0255758	0.0375832	0.0375832
EFS	ENST00000351354.3	1.85393e-05	0.00152453	4.61887	1.07872	3.71661	6.9996	0.172615	1.57285	0.23976	1.57285
CDH17	ENST00000027335.8	1.8671e-05	0.00153344	1.79887	0.420275	4.99122	0.897249	0.0226525	0.242294	0.0733635	0.242294
AP2A1	ENST00000354293.9	1.8894e-05	0.00154569	0.749331	0.175176	7.95663	0.188462	0.00178612	0.0442441	0.0250918	0.0442441
GSE1	ENST00000405402.6	1.96844e-05	0.0016006	4.65683	1.09099	3.61244	7.19868	1.2095	0.575899	0.264386	0.575899
GGCX	ENST00000430215.7	1.97483e-05	0.0016038	0.821969	0.192601	5.64853	0.195617	0.00979044	0.0420962	0.0458525	0.0458525
TAMALIN	ENST00000293662.9	1.99153e-05	0.00161472	4.24756	0.995716	3.22122	5.73606	0.230581	1.25659	0.367474	1.25659
RAB36	ENST00000263116.6	1.99321e-05	0.00161472	1.09262	0.256143	4.78409	0.329827	0.0115689	0.0558098	0.0868448	0.0868448
TMEM250	ENST00000418388.6	2.06524e-05	0.00165863	0.61903	0.14539	6.63662	0.102194	0.00237967	0.0131266	0.0293277	0.0293277
SPTAN1	ENST00000372731.8	2.08068e-05	0.00166701	6.82117	1.6027	4.03773	14.9446	0.428803	3.42416	0.173473	3.42416
MON1B	ENST00000566455.1	2.09842e-05	0.00167508	1.13567	0.266957	5.05405	0.37724	0.0370867	0.0368694	0.0698122	0.0698122
ATXN7L3	ENST00000591295.5	2.10371e-05	0.00167725	5.2469	1.23352	4.56653	8.37746	0.742954	1.53941	0.104399	1.53941
TIMP2	ENST00000262768.11	2.11524e-05	0.00168235	0.592557	0.139348	8.04734	0.0970547	0.00382996	0.0148062	0.0252967	0.0252967
CNOT9	ENST00000542068.5	2.15392e-05	0.0017076	0.660193	0.155402	6.54018	0.128372	0.00598929	0.0264469	0.0302351	0.0302351
LAMB1	ENST00000393561.5	2.15481e-05	0.0017076	1.63541	0.384965	6.65691	0.781181	0.0638962	0.158401	0.0291495	0.158401
IGFBP2	ENST00000233809.9	2.17391e-05	0.00172065	2.15082	0.506523	7.30399	1.39863	0.0051363	0.379712	0.0254468	0.379712
ZC3H3	ENST00000262577.6	2.20191e-05	0.0017407	0.621867	0.14655	6.56749	0.0978349	0.00224772	0.00361154	0.0299677	0.0299677
NBAS	ENST00000442506.5	2.21243e-05	0.00174495	4.78533	1.128	3.56695	6.6197	1.63314	0.260355	0.27545	0.27545
COL9A3	ENST00000466192.5	2.22459e-05	0.00175155	3.76903	0.888697	1.82061	3.76039	0.229955	0.0446715	0.954719	0.954719
UBE2D3	ENST00000321805.11	2.22633e-05	0.00175155	0.634025	0.149503	6.89611	0.135103	0.00617636	0.0207115	0.0273502	0.0273502
SMPD4	ENST00000409031.5	2.25402e-05	0.00176908	0.897944	0.211873	5.74146	0.216383	0.0239692	0.00648736	0.0433662	0.0433662
IER5L	ENST00000372491.3	2.27122e-05	0.00178045	1.68433	0.397584	6.37819	0.871267	0.00322106	0.233888	0.0320089	0.233888
ITM2C	ENST00000326427.11	2.30316e-05	0.00180117	0.772454	0.182472	9.11892	0.239508	0.000228913	0.0497152	0.0332935	0.0497152
COL15A1	ENST00000610452.1	2.31967e-05	0.00181192	4.99851	1.18122	2.48526	7.2922	1.10278	0.990122	0.629067	0.990122
SHC2	ENST00000588376.5	2.3323e-05	0.00181961	1.28176	0.302984	4.65129	0.374744	0.0405955	0.0396136	0.0971038	0.0971038
SHPK	ENST00000225519.3	2.33781e-05	0.00182174	0.776158	0.183493	5.64627	0.182591	0.00458784	0.0131823	0.0459165	0.0459165
MAZ	ENST00000219782.10	2.35847e-05	0.00183565	0.915948	0.216642	7.56032	0.265986	0.0137101	0.0566905	0.0249263	0.0566905
STK11	ENST00000586243.5	2.3764e-05	0.00184137	0.84355	0.199599	5.9086	0.169575	0.0202342	0.014212	0.0395253	0.0395253
KHSRP	ENST00000600480.1	2.37706e-05	0.00184137	1.29812	0.307163	4.68937	0.525943	0.047503	0.0486176	0.0940206	0.0940206
ENSA	ENST00000361532.9	2.42015e-05	0.00186591	1.15717	0.274074	5.10599	0.34219	0.0456262	-0.03599	0.0670483	0.0670483
MED15	ENST00000263205.11	2.41946e-05	0.00186591	0.652235	0.154478	7.13107	0.125252	0.00970939	0.0193525	0.0260858	0.0260858
TCAF1	ENST00000355951.2	2.47414e-05	0.00189415	1.11896	0.265335	5.73393	0.650184	0.0178537	0.0877504	0.0435577	0.0877504
TCP1	ENST00000543532.5	2.48414e-05	0.00189737	1.31067	0.310863	4.94368	0.517789	0.0687447	0.0530481	0.0762089	0.0762089
SLC25A37	ENST00000290075.10	2.49029e-05	0.00189798	4.04234	0.958883	2.94765	4.64682	0.557525	0.821659	0.45415	0.821659
PLEKHG3	ENST00000471182.6	2.53945e-05	0.00192836	0.720094	0.170992	6.4032	0.14475	0.0121448	0.0268766	0.0317127	0.0317127
NLGN2	ENST00000302926.7	2.56555e-05	0.00193918	0.954557	0.226792	6.57818	0.357826	0.00115274	0.0759991	0.0298653	0.0759991
SNRPA	ENST00000243563.8	2.56315e-05	0.00193918	0.70721	0.168017	6.85852	0.129118	0.00160756	0.0407368	0.0275973	0.0407368
H1-10	ENST00000333762.6	2.55919e-05	0.00193918	0.653142	0.155159	8.35815	0.130758	0.000284371	0.0358269	0.0264966	0.0358269
NLGN2	ENST00000640620.2	2.56555e-05	0.00193918	0.954557	0.226792	6.57818	0.357826	0.00115274	0.0759991	0.0298653	0.0759991
RPS9	ENST00000302907.9	2.57216e-05	0.00194194	4.47905	1.06432	3.52755	4.72077	1.41402	-0.781376	0.285143	0.285143
TOR4A	ENST00000357503.3	2.59183e-05	0.00195453	0.764853	0.18182	6.25097	0.185652	0.00204686	0.0475409	0.0336571	0.0475409
PFKL	ENST00000349048.9	2.63299e-05	0.00198329	0.852092	0.20273	7.84552	0.223525	0.000581571	0.0610676	0.0249266	0.0610676
SLC39A3	ENST00000269740.9	2.76926e-05	0.00206442	0.921317	0.219798	5.62648	0.251148	0.00952029	0.0629463	0.0464835	0.0629463
SPATA2L	ENST00000289805.10	2.84128e-05	0.00210864	0.841852	0.201119	5.39043	0.2102	0.0063146	0.0524577	0.054359	0.054359
NAB2	ENST00000300131.8	2.88167e-05	0.0021336	0.640117	0.153042	6.61086	0.12499	0.00410239	0.0310304	0.0295602	0.0310304
IL11	ENST00000585513.1	2.88069e-05	0.0021336	4.85815	1.16149	2.28149	6.61266	0.408036	1.61554	0.718675	1.61554
LY6E	ENST00000429120.6	2.90999e-05	0.00214745	1.73321	0.414604	5.29574	0.875346	0.195588	0.0622564	0.0581562	0.0622564
LY6E	ENST00000632424.1	2.90999e-05	0.00214745	1.73321	0.414604	5.29574	0.875346	0.195588	0.0622564	0.0581562	0.0622564
CA12	ENST00000178638.8	2.98812e-05	0.0021885	1.95096	0.467366	3.67268	0.938361	0.0776423	0.207534	0.250003	0.250003
SH2B2	ENST00000536178.3	2.98901e-05	0.0021885	1.4421	0.34547	4.16693	0.516351	0.0271317	0.0732414	0.151893	0.151893
MXRA8	ENST00000309212.10	3.02692e-05	0.00221378	2.23648	0.536141	6.40588	1.51603	0.0380256	0.393146	0.0316815	0.393146
MARCKS	ENST00000612661.2	3.09384e-05	0.00225516	1.00557	0.241348	8.70445	0.340494	0.000230315	0.0871433	0.0288316	0.0871433
SUFU	ENST00000369902.7	3.10926e-05	0.00226136	0.657908	0.157949	7.03922	0.17523	0.00101645	0.0364054	0.026524	0.0364054
PDIA3	ENST00000469684.1	3.10712e-05	0.00226136	1.18538	0.284574	4.60136	0.406173	0.0201469	0.0201751	0.101327	0.101327
FSTL1	ENST00000469005.1	3.14184e-05	0.00227495	1.76924	0.424998	5.32776	1.46634	0.122921	0.148014	0.0568273	0.148014
SNRPN	ENST00000390687.8	3.16182e-05	0.00227933	1.08201	0.260005	7.02666	0.375719	0.0255018	0.0759021	0.0265894	0.0759021
BICRA	ENST00000396720.7	3.15807e-05	0.00227933	0.658252	0.158167	6.31891	0.155263	0.00477856	0.0271535	0.0327465	0.0327465
ANO8	ENST00000159087.7	3.23606e-05	0.0023188	0.667004	0.160485	6.14293	0.145402	0.00337059	0.0218037	0.0352624	0.0352624
MAN2B1	ENST00000456935.7	3.25692e-05	0.00232993	0.69465	0.167195	7.62703	0.148402	0.000632469	0.041299	0.0248721	0.041299
FAM89A	ENST00000366654.5	3.26393e-05	0.00233239	0.847469	0.204002	5.32849	0.198844	0.00562743	0.0513522	0.0567977	0.0567977
CACNG4	ENST00000262138.4	3.28743e-05	0.00234662	1.45051	0.349303	6.1852	0.632914	0.00325649	0.179762	0.03461	0.179762
KDELR1	ENST00000330720.7	3.29623e-05	0.00235034	0.591681	0.142506	8.85931	0.126426	0.000197547	0.0246014	0.0302644	0.0302644
AC115223.1	ENST00000466377.1	3.3264e-05	0.00236156	1.21548	0.292895	4.48466	0.363976	0.016633	0.037736	0.112048	0.112048
ID1	ENST00000376112.4	3.43037e-05	0.00242224	1.91057	0.461174	7.19322	1.01336	0.00179688	0.317225	0.0258286	0.317225
FGFRL1	ENST00000264748.6	3.42934e-05	0.00242224	0.769451	0.185727	7.02458	0.17973	0.00519723	0.0465447	0.0266004	0.0465447
IRF2BP2	ENST00000491430.1	3.46344e-05	0.00243431	0.655644	0.158344	6.22152	0.114689	0.00353434	0.0207188	0.0340748	0.0340748
TJP1	ENST00000613680.4	3.46978e-05	0.00243431	6.19803	1.49703	4.49647	10.903	1.32773	2.03393	0.110906	2.03393
RPL8	ENST00000528957.5	3.50828e-05	0.00245606	0.931391	0.2251	6.08074	0.207691	0.0397223	-0.00933934	0.0362824	0.0362824
NA	ENST00000375048.7	3.63727e-05	0.00252208	4.45546	1.07896	4.16805	6.01048	1.59452	-0.634544	0.151721	0.151721
TRIM8	ENST00000643721.1	3.64689e-05	0.00252505	0.634838	0.153759	6.7777	0.137527	0.00206984	0.033393	0.0281727	0.033393
SNAPC4	ENST00000298532.2	3.64926e-05	0.00252505	0.67206	0.16278	6.11089	0.124448	0.00336567	0.0363805	0.0357786	0.0363805
FAM174C	ENST00000409293.6	3.67314e-05	0.00253354	1.01231	0.245282	5.01826	0.242353	0.0184384	0.0350749	0.0718065	0.0718065
CPNE2	ENST00000565874.5	3.68466e-05	0.00253848	1.11736	0.270783	5.51163	0.355489	0.0428718	0.0671137	0.0500494	0.0671137
GRAMD1A	ENST00000600231.5	3.68807e-05	0.00253848	0.742319	0.179904	6.51981	0.221572	0.0181079	0.0152646	0.0304402	0.0304402
HLA-B	ENST00000416726.5	3.69771e-05	0.00254053	4.74289	1.14963	3.70656	6.81443	0.833525	1.14893	0.242084	1.14893
CLPP	ENST00000245816.10	3.70889e-05	0.00254479	0.662469	0.160602	6.20609	0.128522	0.00439029	0.0138971	0.0342994	0.0342994
SLC38A10	ENST00000374759.8	3.73992e-05	0.00255804	0.674065	0.163489	7.37984	0.148688	0.00203257	0.0380606	0.0252406	0.0380606
MMP14	ENST00000547074.1	3.77643e-05	0.002575	1.20704	0.292918	5.14613	0.444095	0.0224894	0.106212	0.0650138	0.106212
TNC	ENST00000350763.9	3.83883e-05	0.00261204	1.78582	0.433771	7.79282	1.2555	0.00582179	0.276414	0.0248808	0.276414
EFNB2	ENST00000646441.1	3.86426e-05	0.0026216	1.21678	0.295662	7.22098	0.68699	0.00803016	0.123094	0.0257238	0.123094
TUBB3	ENST00000315491.12	3.86964e-05	0.0026221	1.13211	0.275109	8.00466	0.33231	0.000536108	0.112992	0.0251924	0.112992
SPNS2	ENST00000570979.1	3.91314e-05	0.00264389	3.32022	0.807339	3.50328	3.21722	0.583019	0.394676	0.291147	0.394676
IL11RA	ENST00000318041.13	3.91392e-05	0.00264389	4.51158	1.09704	2.53168	6.83147	1.19542	0.00754647	0.609824	0.609824
SFXN3	ENST00000224807.9	3.96478e-05	0.00267274	1.0667	0.259569	7.04864	0.305922	0.0745879	-0.0270367	0.0264759	0.0264759
SLC16A13	ENST00000308027.6	3.99307e-05	0.00268076	1.22483	0.298165	4.43369	0.37782	0.0161488	0.0742748	0.117205	0.117205
DLG5	ENST00000372391.7	3.99967e-05	0.00268077	1.24194	0.302359	6.63714	0.527775	0.0649624	0.0721686	0.0293231	0.0721686
LRFN3	ENST00000246529.3	4.00344e-05	0.00268077	1.12641	0.274248	5.23612	0.380564	0.0520611	0.014259	0.0607568	0.0607568
FBLN1	ENST00000455233.5	4.00537e-05	0.00268077	3.04658	0.741772	2.58802	2.61152	0.238335	0.237712	0.587004	0.587004
TMEM254	ENST00000372273.7	4.02495e-05	0.00269088	3.82331	0.931143	2.9708	4.8272	0.500968	0.799571	0.44633	0.799571
FZR1	ENST00000652521.1	4.02908e-05	0.00269088	0.888118	0.216308	5.95992	0.212644	0.0316945	0.0314849	0.0384892	0.0384892
TMEM189	ENST00000371650.9	4.07293e-05	0.00271335	4.71806	1.14982	3.69765	6.36213	1.30856	0.674567	0.244153	0.674567
APOBEC3F	ENST00000308521.10	4.08711e-05	0.0027188	0.833169	0.203088	5.35676	0.197854	0.00620332	0.0456016	0.0556639	0.0556639
PRPS2	ENST00000398491.6	4.10957e-05	0.00273096	3.64712	0.889275	2.92008	4.1326	0.722634	0.398396	0.46358	0.46358
GALK1	ENST00000225614.6	4.15341e-05	0.0027545	0.979596	0.238997	5.37428	0.300553	0.00806605	0.0776134	0.0549789	0.0776134
ENPP2	ENST00000075322.10	4.15898e-05	0.00275538	3.3417	0.815354	3.2142	3.51733	0.627664	0.292618	0.36954	0.36954
DDR1	ENST00000449518.5	4.2056e-05	0.00277786	5.08097	1.24051	3.02366	7.66906	1.87948	-1.60536	0.428808	0.428808
SSH3	ENST00000308127.9	4.21767e-05	0.00278303	0.64966	0.158639	6.31336	0.155866	0.00493112	0.00667882	0.0328182	0.0328182
PCGF3	ENST00000440452.5	4.32383e-05	0.00283877	0.843324	0.206219	5.66092	0.185986	0.015244	0.0485454	0.045505	0.0485454
PLP1	ENST00000619236.1	4.3217e-05	0.00283877	3.64986	0.892481	2.24795	3.57693	0.460505	0.107543	0.734278	0.734278
GNAS	ENST00000488546.5	4.33271e-05	0.00284071	0.638198	0.156077	7.74262	0.156279	0.0116837	0.00959641	0.0248566	0.0248566
PRR5	ENST00000611394.4	4.33547e-05	0.00284071	4.60578	1.12643	2.44554	5.14756	1.2574	-1.00804	0.645864	0.645864
PLAT	ENST00000220809.8	4.36256e-05	0.0028556	2.39358	0.585601	6.24251	1.84288	0.480618	-0.101177	0.0337756	0.0337756
MOSPD3	ENST00000393950.7	4.36929e-05	0.00285715	0.785972	0.192309	5.62162	0.158521	0.00884909	0.0232236	0.046625	0.046625
MMP14	ENST00000311852.11	4.44244e-05	0.0028963	1.34989	0.330598	9.27247	0.516689	0.00023241	0.16371	0.0355053	0.16371
SAMD14	ENST00000503131.1	4.46619e-05	0.00290785	3.39067	0.830651	3.16113	3.61632	0.481984	0.552989	0.385436	0.552989
TXNL4A	ENST00000355491.5	4.46904e-05	0.00290785	0.71571	0.175342	5.92245	0.110121	0.0068778	0.0011598	0.0392396	0.0392396
PRKCSH	ENST00000586486.1	4.48634e-05	0.00291621	0.625307	0.153228	6.37096	0.093978	0.00312214	0.00892104	0.0320962	0.0320962
SLC66A2	ENST00000397778.7	4.57233e-05	0.00296035	0.879676	0.215793	5.68896	0.176467	0.0251128	0.0142146	0.0447372	0.0447372
RBMS1	ENST00000409972.5	4.60244e-05	0.00297396	0.864272	0.212094	5.89219	0.270917	0.0166775	0.0507983	0.0398698	0.0507983
EVA1B	ENST00000490466.1	4.64199e-05	0.0029936	1.68342	0.413318	4.68329	1.12665	0.026345	0.229902	0.0945051	0.229902
DPP10	ENST00000310323.12	4.67124e-05	0.0030038	1.23622	0.303627	4.90789	0.586514	0.0521661	0.0861181	0.0784448	0.0861181
TNXB	ENST00000548649.1	4.67157e-05	0.0030038	4.48451	1.10144	2.85731	7.49655	1.33425	-1.21096	0.485519	0.485519
TRIM11	ENST00000284551.11	4.68224e-05	0.00300476	0.603509	0.148248	6.45585	0.0846105	0.00184949	0.00416416	0.0311166	0.0311166
FNDC11	ENST00000615526.1	4.67884e-05	0.00300476	3.0579	0.75112	2.34983	2.50375	0.158623	0.28779	0.68765	0.68765
TCF3	ENST00000453954.6	4.71173e-05	0.00302009	1.10554	0.271666	5.02779	0.363631	0.0394356	0.0634701	0.071268	0.071268
PTOV1	ENST00000391842.5	4.72231e-05	0.00302159	0.923059	0.226854	5.45423	0.268503	0.025177	0.0241036	0.052017	0.052017
APH1A	ENST00000369109.8	4.77424e-05	0.00304885	0.591583	0.14548	6.86121	0.112965	0.00416758	0.0200777	0.0275792	0.0275792
CDK7	ENST00000514676.5	4.81851e-05	0.00306516	4.76746	1.17302	1.7513	5.68014	1.06966	0.810628	0.994304	0.994304
CDK7	ENST00000617026.4	4.81851e-05	0.00306516	4.76746	1.17302	1.7513	5.68014	1.06966	0.810628	0.994304	0.994304
PLA2G2A	ENST00000491964.5	4.81392e-05	0.00306516	3.74861	0.922284	3.11804	5.2616	0.12584	1.15007	0.398689	1.15007
ABHD17A	ENST00000588598.5	4.8946e-05	0.00310151	0.896867	0.22087	5.24017	0.172077	0.0126007	0.0145226	0.0605748	0.0605748
TNKS1BP1	ENST00000358252.8	4.90095e-05	0.00310253	0.644727	0.158788	8.47653	0.161373	0.00033191	0.0374885	0.0271688	0.0374885
MOV10	ENST00000357443.2	5.08276e-05	0.00320522	1.42898	0.352678	6.04783	0.645123	0.109395	0.0771777	0.0368529	0.0771777
THOC3	ENST00000265097.8	5.11973e-05	0.00321924	0.60177	0.148582	6.72179	0.100443	0.00450778	0.00195079	0.028607	0.028607
MTA1	ENST00000469140.2	5.1308e-05	0.0032231	1.37749	0.340156	4.20694	0.485187	0.0277125	0.144634	0.145847	0.145847
SEMA3F	ENST00000450338.5	5.33051e-05	0.00332621	3.88463	0.961389	3.17552	5.27915	0.0528488	1.33355	0.381081	1.33355
NPDC1	ENST00000371600.7	5.44658e-05	0.00338573	1.02313	0.253526	5.82635	0.278928	0.00873581	0.0876773	0.0413213	0.0876773
SLC2A4RG	ENST00000493772.5	5.52736e-05	0.00342618	0.976439	0.242164	6.31079	0.26498	0.011059	0.0769065	0.0328516	0.0769065
UBTD1	ENST00000370664.4	5.55816e-05	0.00343875	0.973481	0.241509	6.10631	0.298627	0.00284287	0.0846471	0.035854	0.0846471
RRBP1	ENST00000246043.8	5.64575e-05	0.00347652	0.956255	0.237452	8.66924	0.327439	0.00128995	0.0832854	0.0285413	0.0832854
HMCN2	ENST00000624552.3	5.73971e-05	0.00352774	3.20376	0.796309	2.10766	4.00527	0.148881	0.756864	0.80228	0.80228
ALDH18A1	ENST00000371224.7	5.80895e-05	0.00355694	0.972977	0.242008	7.82514	0.349846	0.0026242	0.0852273	0.0249065	0.0852273
BCORL1	ENST00000456822.5	5.79601e-05	0.00355694	0.710974	0.176817	5.90649	0.149432	0.00732699	0.0155534	0.0395692	0.0395692
LZTS3	ENST00000337576.6	5.81461e-05	0.00355708	1.0087	0.250907	6.41759	0.283037	0.0381326	0.0562986	0.0315461	0.0562986
EFNA5	ENST00000509503.1	5.82085e-05	0.00355756	3.33447	0.829478	2.53	3.88491	0.421538	0.505392	0.610512	0.610512
REEP4	ENST00000306306.8	5.96526e-05	0.00363564	0.967925	0.241126	6.09649	0.275921	0.00529988	0.0819131	0.036017	0.0819131
ARHGAP39	ENST00000377307.6	5.99724e-05	0.00364964	0.797951	0.198845	5.70167	0.188609	0.0149119	0.0423581	0.0443973	0.0443973
ID1	ENST00000376105.4	6.00951e-05	0.00365241	2.08679	0.52008	4.84124	1.20423	0.0808173	0.324908	0.0828351	0.324908
KMT5C	ENST00000255613.8	6.03978e-05	0.003664	0.797358	0.19878	5.62063	0.172007	0.0126168	0.0281827	0.0466536	0.0466536
GANAB	ENST00000356638.8	6.16108e-05	0.00372035	0.597701	0.149181	8.9913	0.141238	0.00168239	0.0237971	0.0317	0.0317
VHL	ENST00000256474.2	6.18596e-05	0.00373193	0.649949	0.16226	6.34009	0.150593	0.00701528	0.0170985	0.0324772	0.0324772
HES1	ENST00000232424.4	6.25307e-05	0.00376548	0.707514	0.176744	6.95004	0.140471	0.00110465	0.0457528	0.0270179	0.0457528
SULF2	ENST00000467815.5	6.26022e-05	0.00376632	0.704308	0.175955	6.96786	0.191585	0.0195264	0.0138821	0.0269137	0.0269137
CCND3	ENST00000372991.8	6.27144e-05	0.0037696	0.699957	0.174886	6.53234	0.164414	0.00636626	0.0395115	0.0303134	0.0395115
HS6ST1	ENST00000259241.7	6.29931e-05	0.00378288	0.768032	0.191945	7.65628	0.227277	0.000575594	0.0546888	0.0248587	0.0546888
EPHX1	ENST00000272167.9	6.32939e-05	0.00379398	0.610103	0.152519	6.9001	0.0969133	0.00333829	0.0315547	0.0273247	0.0315547
FBLN1	ENST00000327858.11	6.34649e-05	0.00380075	1.40257	0.350683	7.40896	0.673293	0.00152806	0.18294	0.0251732	0.18294
CCNL2	ENST00000418865.6	6.41624e-05	0.00382502	0.647305	0.16195	6.86821	0.108453	0.0049066	0.0344349	0.0275324	0.0344349
DDR1	ENST00000506573.1	6.49341e-05	0.00386399	3.3098	0.828667	2.24481	3.18463	0.279621	0.750412	0.735756	0.750412
MAD2L2	ENST00000376692.9	6.52208e-05	0.00387753	0.612131	0.153298	6.32068	0.0979981	0.00252672	0.031986	0.0327237	0.0327237
TJP3	ENST00000541714.7	6.58135e-05	0.00390567	5.28093	1.32323	2.12665	7.27122	0.589183	2.03723	0.79283	2.03723
NADSYN1	ENST00000319023.6	6.60136e-05	0.00391399	0.640191	0.16044	6.25016	0.124902	0.00494333	0.0291044	0.0336683	0.0336683
CBX2	ENST00000310942.9	6.65153e-05	0.00394017	1.11999	0.28081	6.42201	0.345616	0.00203284	0.116249	0.0314956	0.116249
KISS1R	ENST00000234371.10	6.79235e-05	0.00401632	3.19724	0.802632	2.26697	3.1233	0.101624	0.864704	0.7254	0.864704
TKFC	ENST00000529479.5	6.83115e-05	0.00403198	0.924625	0.232196	5.17501	0.229622	0.0172698	0.0125404	0.0636025	0.0636025
LPAR1	ENST00000374431.7	6.82643e-05	0.00403198	1.85808	0.46659	4.80872	1.29285	0.241472	0.024195	0.0850879	0.0850879
TTLL3	ENST00000383827.5	6.86704e-05	0.00404505	1.04751	0.263137	5.21057	0.231427	0.0419378	-0.0123103	0.061924	0.061924
FBRSL1	ENST00000542061.2	7.00873e-05	0.00410511	0.797866	0.200671	5.38451	0.177075	0.00581848	0.0492253	0.0545848	0.0545848
FURIN	ENST00000610579.4	7.00191e-05	0.00410511	0.841986	0.211755	8.5599	0.214967	0.00159123	0.0656693	0.0277188	0.0656693
BCAR1	ENST00000538440.6	7.17058e-05	0.00416843	0.640861	0.161403	7.85955	0.126775	0.00503462	0.034042	0.0249424	0.034042
WNT2B	ENST00000369684.5	7.18243e-05	0.00417161	5.56207	1.40097	4.73915	11.4333	0.440745	2.50333	0.0901645	2.50333
SV2A	ENST00000369146.8	7.21482e-05	0.00418671	0.728257	0.183482	6.32789	0.218689	0.00234162	0.0481569	0.0326315	0.0481569
OAT	ENST00000368845.5	7.22631e-05	0.00418899	0.731296	0.184266	7.33737	0.18512	0.000961282	0.0499694	0.0253506	0.0499694
MMP2	ENST00000219070.9	7.23156e-05	0.00418899	1.18229	0.297916	8.96863	0.466958	0.000463133	0.132668	0.0314386	0.132668
CUL7	ENST00000265348.7	7.27725e-05	0.00421173	0.63919	0.161125	7.30273	0.15751	0.00302546	0.0359167	0.0254506	0.0359167
SHC1	ENST00000448116.6	7.29596e-05	0.00421883	1.38608	0.349453	7.23783	0.727722	0.0318594	0.151317	0.0256632	0.151317
ACTG1	ENST00000573283.7	7.31833e-05	0.00422535	1.20248	0.303221	10.9232	0.44127	5.64108e-05	0.137858	0.0946787	0.137858
NECTIN2	ENST00000252483.10	7.34535e-05	0.00422955	1.24243	0.313365	7.34687	0.557567	0.00330115	0.143995	0.0253248	0.143995
EFNA3	ENST00000368408.4	7.41541e-05	0.00424693	1.12039	0.282746	4.60756	0.4011	0.0191267	0.0759781	0.100791	0.100791
ZFHX3	ENST00000397992.5	7.41592e-05	0.00424693	0.992909	0.250574	6.85181	0.264729	0.0392443	0.0549371	0.0276428	0.0549371
GPRC5C	ENST00000652294.1	7.48488e-05	0.00427893	1.13759	0.287248	6.02398	0.362593	0.0269854	0.0967817	0.0372804	0.0967817
MAP7D1	ENST00000316156.8	7.53168e-05	0.00428974	0.621222	0.156921	6.99216	0.118635	0.01016	0.0231089	0.0267761	0.0267761
SDR39U1	ENST00000555355.5	7.6802e-05	0.00436013	4.06615	1.02832	3.05013	4.86538	0.861262	0.724898	0.420211	0.724898
RAC3	ENST00000306897.9	7.74034e-05	0.00439046	0.699946	0.177098	6.10515	0.167294	0.00329061	0.0437552	0.0358732	0.0437552
LAMB1	ENST00000439976.5	7.81294e-05	0.00442398	1.58788	0.401988	3.94811	0.884979	0.0521461	0.0504293	0.190246	0.190246
TRADD	ENST00000345057.9	7.83475e-05	0.00443249	0.982364	0.248738	4.8749	0.235501	0.0122249	0.0419453	0.0805807	0.0805807
DMWD	ENST00000377735.7	7.85822e-05	0.00444193	1.10989	0.281077	5.84933	0.328841	0.0777049	-0.0144111	0.0408019	0.0408019
NA	ENST00000252725.10	7.86587e-05	0.00444242	1.60028	0.405293	6.27417	0.764543	0.213055	-0.101378	0.0333379	0.0333379
UNK	ENST00000589666.6	7.87824e-05	0.00444557	0.600942	0.152212	6.31208	0.0940898	0.0019177	0.00983619	0.0328348	0.0328348
ZNF581	ENST00000270451.6	7.95394e-05	0.00448056	0.878003	0.222517	5.96914	0.278647	0.0072993	0.0669713	0.0383096	0.0669713
BET1L	ENST00000325147.13	8.07305e-05	0.00453594	1.34955	0.342334	5.26437	0.462368	0.116285	-0.0255741	0.0595036	0.0595036
IGFBP2	ENST00000456764.1	8.09305e-05	0.00454029	1.6025	0.406557	6.89762	0.832138	0.00433302	0.2436	0.0273405	0.2436
SLC2A8	ENST00000373371.7	8.09747e-05	0.00454029	0.78177	0.198344	5.66807	0.186159	0.0137034	0.0104918	0.0453068	0.0453068
LASP1	ENST00000318008.11	8.12516e-05	0.0045496	0.902961	0.229138	9.09725	0.261629	0.00019253	0.0785641	0.0330079	0.0785641
PLSCR3	ENST00000619711.5	8.15006e-05	0.00455186	0.715447	0.181588	6.14887	0.180664	0.00554456	0.0439167	0.0351687	0.0439167
PLSCR3	ENST00000639874.2	8.15006e-05	0.00455186	0.715447	0.181588	6.14887	0.180664	0.00554456	0.0439167	0.0351687	0.0439167
RCC1	ENST00000373832.5	8.13888e-05	0.00455186	1.56998	0.398444	5.75591	0.544382	0.195132	-0.11974	0.0430036	0.0430036
COL6A3	ENST00000472056.5	8.24331e-05	0.00460002	6.1044	1.55044	5.85255	12.8068	0.479243	3.12654	0.0407302	3.12654
OLFM2	ENST00000590841.5	8.27701e-05	0.00461489	1.03019	0.26172	5.77407	0.326616	0.0275382	0.075208	0.0425563	0.075208
ARHGDIA	ENST00000541078.6	8.51687e-05	0.00472448	1.48495	0.37791	4.35041	0.6284	0.0875962	-0.0400731	0.126627	0.126627
SBNO2	ENST00000361757.8	8.51341e-05	0.00472448	0.818561	0.208313	6.65641	0.221528	0.0173697	0.0477221	0.0291538	0.0477221
RPL36	ENST00000347512.8	8.54754e-05	0.00473347	0.616818	0.157011	8.18927	0.125703	0.00107051	0.0359081	0.0257467	0.0359081
HELZ2	ENST00000427522.6	8.54051e-05	0.00473347	1.34449	0.342222	5.58306	0.515168	0.00961382	0.16606	0.0477755	0.16606
TYRO3	ENST00000559066.5	8.58875e-05	0.00475227	0.615395	0.156695	6.30938	0.174369	0.00395995	0.0158436	0.0328699	0.0328699
ARHGEF2	ENST00000361247.9	8.67929e-05	0.00478619	0.587044	0.149572	7.03121	0.142854	0.0069921	0.0210313	0.0265656	0.0265656
EFNB2	ENST00000643990.1	8.84638e-05	0.00486603	5.76424	1.47038	5.03132	10.6861	1.4611	1.78193	0.0710699	1.78193
GPRIN2	ENST00000374317.1	8.89307e-05	0.0048876	1.41114	0.36008	4.29419	0.692815	0.060211	0.134275	0.133703	0.134275
ATP2C1	ENST00000504612.5	8.98937e-05	0.00492812	5.21236	1.33092	4.14727	8.12139	1.54523	1.11178	0.154975	1.11178
NUBP2	ENST00000262302.14	9.11859e-05	0.00496982	0.774618	0.197964	6.042	0.197387	0.0195003	0.0392843	0.0369563	0.0392843
JDP2	ENST00000559060.5	9.18051e-05	0.00499941	3.14044	0.802916	2.37789	3.21494	0.15159	0.815421	0.675205	0.815421
SLC25A22	ENST00000628067.3	9.30713e-05	0.00505574	0.749179	0.191705	5.9494	0.173511	0.0123851	0.0427411	0.0386966	0.0427411
FTL	ENST00000331825.11	9.30022e-05	0.00505574	0.625206	0.159975	9.4343	0.12376	8.65216e-05	0.0383013	0.0382242	0.0383013
CCBE1	ENST00000589116.2	9.32828e-05	0.00506303	4.07541	1.04299	2.10421	4.81402	0.827738	-0.292429	0.804006	0.804006
SLC18A3	ENST00000374115.5	9.35362e-05	0.00506838	2.9014	0.742658	2.36411	3.35536	0.146017	0.156809	0.681294	0.681294
EMP1	ENST00000536383.1	9.44966e-05	0.00511618	4.02852	1.03182	1.97228	4.04056	0.725059	-0.41793	0.871907	0.871907
FAM219B	ENST00000563069.5	9.60121e-05	0.00518085	3.67802	0.942971	2.64522	3.93797	0.769368	0.0052811	0.564424	0.564424
CMIP	ENST00000537098.7	9.70773e-05	0.00522366	0.82711	0.2122	7.60329	0.222008	0.00529198	0.0622514	0.0248876	0.0622514
PLK2	ENST00000503378.1	9.76772e-05	0.00524931	3.97735	1.02081	2.98097	4.98918	1.09987	0.463192	0.442922	0.463192
LENG8	ENST00000610347.1	9.7874e-05	0.00525557	0.834023	0.214083	7.12496	0.182623	0.00443086	0.0643161	0.0261128	0.0643161
CDT1	ENST00000301019.9	9.84086e-05	0.00527562	0.938851	0.241072	5.56539	0.232231	0.00540847	0.0817651	0.0483206	0.0817651
DCN	ENST00000550563.5	9.88061e-05	0.00528827	3.83578	0.985175	3.13718	6.06832	0.336233	1.11962	0.392765	1.11962
PPP1R12C	ENST00000263433.8	9.89363e-05	0.00529091	0.652999	0.167729	6.49507	0.12609	0.0115035	0.0238137	0.0306959	0.0306959
COCH	ENST00000216361.9	0.000100911	0.0053877	4.11104	1.05726	2.00337	4.52497	0.821139	-0.245651	0.855562	0.855562
MAP3K10	ENST00000253055.8	0.000102067	0.00544498	0.69728	0.179451	5.70236	0.120855	0.00392503	0.0103206	0.044379	0.044379
NAGA	ENST00000396398.7	0.000103229	0.00549354	0.738489	0.190191	6.23321	0.178244	0.00399903	0.05026	0.0339073	0.05026
UHRF1	ENST00000624301.3	0.000103373	0.0054953	1.13407	0.292096	5.34076	0.337244	0.0642473	0.063733	0.0563014	0.063733
RERE	ENST00000377464.5	0.00010343	0.0054953	0.906427	0.233471	7.57176	0.342833	0.014004	0.0677589	0.0249146	0.0677589
SLC9A3R2	ENST00000424542.7	0.000103693	0.00550037	1.21741	0.313621	4.84372	0.42118	0.053978	0.093559	0.0826665	0.093559
RAB32	ENST00000367495.4	0.000104568	0.0055378	0.955093	0.246174	6.18326	0.265591	0.00221954	0.0886832	0.0346392	0.0886832
LAYN	ENST00000375614.6	0.000104979	0.00555056	4.96691	1.28053	2.98247	8.27877	2.01722	-0.915689	0.442422	0.442422
SEMA3D	ENST00000284136.10	0.000105243	0.00556002	0.740022	0.190817	6.37514	0.235606	0.00302099	0.0515957	0.0320457	0.0515957
SAMD11	ENST00000420190.6	0.000105348	0.00556112	1.5906	0.410168	3.84876	0.756693	0.0418795	0.192559	0.210477	0.210477
EXD3	ENST00000479452.5	0.000106222	0.00559821	3.72409	0.960828	1.92776	3.98258	0.489109	-0.373352	0.895676	0.895676
RHPN1	ENST00000522899.1	0.000107083	0.00562546	1.56981	0.405222	3.98554	0.601119	0.0632416	0.0902123	0.183065	0.183065
GATAD2A	ENST00000418032.3	0.000107489	0.00564225	0.755866	0.195161	6.27914	0.224086	0.0184044	0.0387274	0.0332707	0.0387274
SH3PXD2B	ENST00000311601.6	0.000108553	0.00569357	0.988496	0.255383	7.98332	0.313758	0.000398244	0.0974328	0.0251455	0.0974328
SLC35B2	ENST00000393812.4	0.000109421	0.00573446	0.793613	0.205137	7.11662	0.191512	0.00785009	0.0552719	0.0261501	0.0552719
CAPN1	ENST00000279247.10	0.00011019	0.00577018	0.587303	0.151876	8.35698	0.103424	0.00143414	0.0331655	0.0264905	0.0331655
KLHL42	ENST00000539176.1	0.00011087	0.00580111	1.10281	0.285298	4.65079	0.338671	0.0249472	0.0641754	0.097145	0.097145
FGFRL1	ENST00000510644.6	0.000113235	0.00590247	0.791852	0.205126	6.08898	0.168962	0.0269718	0.0360426	0.036143	0.036143
SLC19A1	ENST00000311124.9	0.000114395	0.00594755	0.814428	0.21111	5.45435	0.189645	0.00945909	0.0573921	0.0520126	0.0573921
FBXO41	ENST00000521871.5	0.000115519	0.00599172	4.38801	1.13813	2.40114	6.34415	1.278	-0.0642964	0.665016	0.665016
KDELR3	ENST00000409006.3	0.000115762	0.00599585	1.25143	0.324631	4.62116	0.58701	0.0584506	0.0260063	0.099627	0.099627
ATP8B2	ENST00000505882.1	0.000117418	0.00606148	4.22255	1.09635	1.8516	4.50047	0.865606	0.113859	0.937378	0.937378
SOX17	ENST00000297316.5	0.00011742	0.00606148	1.51331	0.392921	3.9326	0.638858	0.0339184	0.197662	0.193294	0.197662
MROH6	ENST00000618551.2	0.00011725	0.00606148	3.7301	0.968404	2.42211	3.67375	0.750788	-0.0789893	0.655921	0.655921
LBX2	ENST00000377566.9	0.000118158	0.00608517	3.48447	0.905076	1.59891	3.0639	0.143306	-0.000404656	1.08544	1.08544
TWF2	ENST00000305533.10	0.000118153	0.00608517	0.872621	0.226659	6.75929	0.225899	0.00331463	0.0737469	0.0283124	0.0737469
EPB41L1	ENST00000373941.5	0.0001183	0.00608772	4.00366	1.04001	2.37121	6.3441	0.944292	0.120301	0.678152	0.678152
NAP1L1	ENST00000547704.5	0.000118401	0.00608812	4.57144	1.18757	3.90418	7.22308	0.247594	1.86788	0.198988	1.86788
NFATC4	ENST00000555393.5	0.000119418	0.00610682	1.95365	0.507796	4.3119	1.26735	0.255374	-0.00145533	0.131411	0.131411
YWHAE	ENST00000489287.1	0.000119189	0.00610682	4.0872	1.06222	3.31167	5.41286	0.58594	1.10653	0.341571	1.10653
CFI	ENST00000504853.3	0.000119278	0.00610682	3.49222	0.907635	3.41781	3.82998	0.156703	1.079	0.3129	1.079
TEAD3	ENST00000338863.12	0.000118961	0.00610682	0.59651	0.155008	7.73002	0.110075	0.00412497	0.0319162	0.0248534	0.0319162
NFATC4	ENST00000644583.1	0.000119418	0.00610682	1.95365	0.507796	4.3119	1.26735	0.255374	-0.00145533	0.131411	0.131411
YWHAE	ENST00000627099.1	0.000119189	0.00610682	4.0872	1.06222	3.31167	5.41286	0.58594	1.10653	0.341571	1.10653
FAM89B	ENST00000530349.2	0.00012063	0.00615063	0.615272	0.160025	6.47886	0.100489	0.00754462	0.0137444	0.0308675	0.0308675
ATXN2L	ENST00000562583.5	0.000120674	0.00615063	1.02781	0.267328	5.42366	0.298233	0.02495	0.0822466	0.0531182	0.0822466
PTPRF	ENST00000496447.5	0.00012085	0.0061512	1.16933	0.304164	5.91163	0.368281	0.0730176	0.0657563	0.0394622	0.0657563
KCNN1	ENST00000222249.13	0.000123059	0.00623068	1.456	0.379172	4.12967	0.645933	0.0578612	0.13366	0.157796	0.157796
HSPD1	ENST00000476746.5	0.00012317	0.00623068	0.858381	0.223553	5.27093	0.200102	0.0157456	0.0277772	0.059218	0.059218
ACSM3	ENST00000440284.6	0.000124121	0.00627379	4.02723	1.04935	2.97507	4.87922	0.71001	0.941682	0.444897	0.941682
SEC11A	ENST00000559729.5	0.000126774	0.00636371	0.814971	0.21264	5.34102	0.152982	0.0115324	-0.00445929	0.056291	0.056291
LSP1P5	ENST00000636560.1	0.000129049	0.0064482	0.936136	0.244533	5.10284	0.243425	0.0224826	0.0272874	0.0672117	0.0672117
IDUA	ENST00000247933.9	0.000130418	0.00650666	5.37077	1.40388	2.99349	7.87174	2.51755	-2.15997	0.438753	0.438753
ZNF580	ENST00000325333.10	0.000131235	0.0065226	0.865788	0.226401	6.14091	0.263887	0.00713315	0.0697533	0.0352942	0.0697533
GRK6	ENST00000355472.10	0.000131206	0.0065226	0.779746	0.203899	5.98554	0.165294	0.024367	0.00751481	0.0379949	0.0379949
CROCC	ENST00000375541.10	0.000131161	0.0065226	0.978583	0.255887	5.35889	0.349916	0.00661832	0.0915993	0.05558	0.0915993
MAPK8IP1	ENST00000241014.6	0.000131504	0.00653102	0.635816	0.166286	6.10261	0.101488	0.00556133	0.0239966	0.0359153	0.0359153
LEF1	ENST00000379951.6	0.000131872	0.00653442	4.8325	1.26408	4.14864	8.0593	1.25671	1.14014	0.154759	1.14014
SHARPIN	ENST00000398712.7	0.00013222	0.00654176	0.622945	0.162977	6.1037	0.115661	0.0039451	0.0142576	0.0358972	0.0358972
ACADM	ENST00000534146.5	0.000132436	0.00654747	4.42072	1.15669	1.60902	5.06171	0.927668	0.910309	1.07921	1.07921
CACNB3	ENST00000301050.7	0.00013301	0.00656595	0.723673	0.189403	6.25793	0.172902	0.0202497	-0.00111088	0.0335604	0.0335604
FBLN7	ENST00000331203.7	0.000133284	0.00657255	3.68047	0.963394	2.69084	4.38562	0.471188	0.921005	0.546821	0.921005
THBS3	ENST00000469769.1	0.00013359	0.00657474	2.97358	0.778475	2.07805	2.67649	0.0918664	0.737427	0.81717	0.81717
CLTA	ENST00000345519.10	0.000133545	0.00657474	0.607501	0.159039	7.77778	0.119001	0.000599747	0.0373402	0.0248716	0.0373402
HNRNPUL1	ENST00000595196.5	0.000134732	0.00662597	0.702903	0.18412	6.87376	0.188017	0.0233544	0.01634	0.0274956	0.0274956
CARHSP1	ENST00000561530.5	0.000135611	0.0066623	0.80501	0.210954	5.81434	0.240923	0.0251542	0.0303157	0.0415983	0.0415983
KIAA1522	ENST00000373481.7	0.000136419	0.00668384	0.712857	0.186877	8.07543	0.195892	0.00253068	0.049854	0.0253731	0.049854
BAMBI	ENST00000497699.1	0.000138168	0.00673957	0.745336	0.195553	5.76112	0.199978	0.0144871	0.0310583	0.0428743	0.0428743
ARHGDIA	ENST00000269321.12	0.000138054	0.00673957	0.700883	0.18388	8.71412	0.150644	0.000240456	0.0504774	0.0289135	0.0504774
BIRC5	ENST00000301633.8	0.000139168	0.00677792	4.50821	1.18337	2.13062	5.03648	1.30968	-0.643254	0.790867	0.790867
HES4	ENST00000304952.10	0.000139676	0.00679257	1.02797	0.269899	4.98966	0.260127	0.0358135	0.0176377	0.0734546	0.0734546
KIFC3	ENST00000445690.7	0.000140111	0.00680361	0.771191	0.20252	6.72477	0.170737	0.029143	0.0323785	0.0285831	0.0323785
SDSL	ENST00000403593.9	0.000145067	0.00701704	0.958145	0.252186	4.90509	0.239648	0.0167725	0.0732483	0.0786239	0.0786239
UBE2S	ENST00000264552.14	0.000147205	0.00709034	0.840082	0.221323	6.90043	0.206169	0.00178604	0.0716894	0.0273226	0.0716894
SERAC1	ENST00000642244.1	0.000147343	0.00709166	4.6453	1.22389	2.39789	5.4868	1.58045	-1.43068	0.666432	0.666432
RHBDD3	ENST00000216085.12	0.000149521	0.0071859	1.06424	0.280664	5.17633	0.329956	0.0546193	-0.0120434	0.0635392	0.0635392
FAM171A2	ENST00000293443.11	0.00015191	0.00728469	0.912658	0.240939	6.49001	0.308758	0.00217992	0.0848972	0.030749	0.0848972
SLC29A4	ENST00000297195.8	0.000153631	0.00735104	1.39253	0.367894	5.85233	0.563864	0.157761	0.0452582	0.0407351	0.0452582
YIF1B	ENST00000592694.5	0.000154002	0.00735622	0.729984	0.192886	5.85579	0.147701	0.0151494	0.0281704	0.0406584	0.0406584
FKBP10	ENST00000464180.1	0.000154627	0.00737565	0.964757	0.254989	4.89949	0.265062	0.0183764	0.079153	0.0789819	0.079153
SLC43A2	ENST00000613070.4	0.000154709	0.00737565	0.967877	0.255823	5.25672	0.267854	0.0383288	0.0430733	0.0598393	0.0598393
RNF215	ENST00000382363.7	0.000155302	0.00738946	0.808811	0.213833	5.38869	0.179919	0.0141618	0.00376466	0.0544253	0.0544253
PLXND1	ENST00000504524.5	0.000155337	0.00738946	5.58808	1.4774	2.35287	8.4534	1.04109	2.23297	0.686293	2.23297
RNPS1	ENST00000566397.5	0.000157156	0.00746514	5.67352	1.50114	5.29996	10.1861	1.20931	2.1708	0.0579785	2.1708
NA	ENST00000345523.9	0.000159318	0.00756235	0.761397	0.201637	6.31516	0.175659	0.00414208	0.0568442	0.0327949	0.0568442
FRMD4A	ENST00000495956.2	0.000161154	0.00762737	3.73444	0.989722	2.66176	4.26018	0.573692	0.895632	0.558001	0.895632
H2AJ	ENST00000544848.2	0.000164245	0.00775124	0.910214	0.241533	6.19418	0.285263	0.00269605	0.0848115	0.0344756	0.0848115
SLC27A1	ENST00000252595.12	0.000164399	0.00775295	0.782622	0.207689	5.74644	0.248463	0.00523408	0.0594678	0.0432404	0.0594678
PKP4	ENST00000421462.5	0.00016455	0.00775448	3.6879	0.978738	1.33107	3.7009	0.126992	1.3099	1.26014	1.3099
NUMA1	ENST00000540626.5	0.000165188	0.00777185	0.681077	0.180798	6.15272	0.134272	0.0139237	0.0348809	0.0351084	0.0351084
TYRO3	ENST00000568490.1	0.00016576	0.00777788	0.805077	0.213765	5.28204	0.197545	0.0098039	0.0325871	0.058739	0.058739
FAM189B	ENST00000361361.7	0.000166083	0.00778748	0.95976	0.254869	6.49243	0.296113	0.0667137	-0.0456396	0.0307236	0.0307236
ACTG1	ENST00000644774.1	0.000166997	0.00781912	2.11685	0.562346	5.4268	1.43757	0.300595	0.173754	0.0530034	0.173754
TBC1D16	ENST00000310924.7	0.000168652	0.00788533	0.599812	0.159445	7.61179	0.165315	0.00124336	0.0368909	0.0248815	0.0368909
GGH	ENST00000260118.7	0.000169932	0.00793949	0.822816	0.218836	5.95696	0.188417	0.00344306	0.0683905	0.0385473	0.0683905
APRT	ENST00000378364.7	0.000170175	0.00794518	0.632497	0.168234	6.13187	0.11592	0.00701587	0.0205936	0.0354384	0.0354384
LTBP3	ENST00000529189.5	0.000171695	0.0080003	4.46484	1.18828	1.71296	5.39416	0.649312	1.46871	1.01669	1.46871
KNOP1	ENST00000568230.5	0.000171909	0.0080003	1.04187	0.27731	4.76103	0.263194	0.0268218	-0.0078971	0.0885293	0.0885293
TUBB2B	ENST00000259818.8	0.000171932	0.0080003	1.41179	0.375773	7.24525	0.532819	0.00151407	0.210293	0.0256372	0.210293
GSN	ENST00000373818.8	0.000171907	0.0080003	0.687256	0.182923	8.2254	0.165989	0.0110761	0.039115	0.0258871	0.039115
MUC1	ENST00000611571.4	0.000172763	0.00800321	0.983718	0.261917	4.80853	0.313207	0.0177991	0.0272939	0.0851017	0.0851017
ERCC1	ENST00000591636.5	0.00017402	0.00805575	5.13005	1.36655	2.10863	7.16152	0.836929	1.96426	0.8018	1.96426
CADM1	ENST00000616271.4	0.000175232	0.00809869	0.619748	0.165166	6.56445	0.131278	0.0109224	0.0261193	0.0299971	0.0299971
ORAI1	ENST00000617316.2	0.000175675	0.00810878	1.10688	0.295037	5.12004	0.33913	0.0642442	-0.000145263	0.066326	0.066326
MINK1	ENST00000355280.11	0.000175785	0.00810878	0.653337	0.174154	7.69679	0.151636	0.00227426	0.0432201	0.0248508	0.0432201
SSBP4	ENST00000270061.12	0.000178494	0.00819316	1.04624	0.279172	6.05022	0.3733	0.0761515	0.0407539	0.0368108	0.0407539
CLSPN	ENST00000520551.1	0.000178825	0.008197	4.95839	1.32323	2.53036	5.68717	2.01604	-1.73231	0.610363	0.610363
COMMD4	ENST00000267935.12	0.000180564	0.00825117	0.653225	0.174437	6.01109	0.118789	0.00812597	0.0315971	0.0375164	0.0375164
SMIM29	ENST00000413013.6	0.000181318	0.00827651	3.84774	1.02779	1.94373	3.95091	0.697418	-0.655929	0.887098	0.887098
RARG	ENST00000425354.7	0.000182715	0.00832096	1.46223	0.390784	5.35715	0.65641	0.160026	0.0690425	0.0556485	0.0690425
EPHB6	ENST00000632037.1	0.000182716	0.00832096	1.06985	0.285919	5.58642	0.298601	0.0749511	0.0141265	0.0476732	0.0476732
HMGCL	ENST00000374490.8	0.00018344	0.00833851	0.752554	0.201175	6.27779	0.186104	0.00722456	0.0534825	0.033289	0.0534825
NPW	ENST00000566435.3	0.000184665	0.00838252	2.21176	0.591519	3.66404	1.31544	0.0765593	0.448283	0.252045	0.448283
FBXO2	ENST00000354287.5	0.000185542	0.00840486	0.95097	0.254411	6.77951	0.282521	0.00175915	0.0953283	0.0281592	0.0953283
CD99	ENST00000611428.5	0.000186237	0.00842973	0.674163	0.180403	6.86332	0.161412	0.00479353	0.0440242	0.027565	0.0440242
SIVA1	ENST00000329967.11	0.000188343	0.00848476	0.618288	0.165576	5.99688	0.0916557	0.00334248	0.0133133	0.0377807	0.0377807
CTXN1	ENST00000318978.6	0.000189289	0.00850982	0.931615	0.249569	6.88452	0.253691	0.0012873	0.0921396	0.027425	0.0921396
DAG1	ENST00000539901.5	0.000191112	0.00858001	4.72301	1.26606	2.45558	5.70504	1.76276	-1.59191	0.64159	0.64159
STT3B	ENST00000453168.5	0.000191344	0.00858451	0.86734	0.23252	5.09645	0.229004	0.0135534	0.0135879	0.0675447	0.0675447
RHOC	ENST00000369642.7	0.000192377	0.00861903	0.586016	0.157159	7.07039	0.114645	0.00875711	0.0282911	0.0263674	0.0282911
RECQL5	ENST00000578865.5	0.000192938	0.00862752	4.21102	1.12954	1.77383	3.66032	0.932471	-0.877188	0.981318	0.981318
SAMD11	ENST00000622503.4	0.000192962	0.00862752	4.33081	1.16168	2.44198	5.91955	1.37687	-0.994202	0.647386	0.647386
NUP133	ENST00000366678.4	0.00019369	0.00864829	3.33689	0.895304	2.58148	3.96792	0.612728	0.481514	0.589625	0.589625
SEL1L3	ENST00000399878.8	0.000194218	0.00866596	1.5671	0.420538	6.12257	0.886317	0.22969	-0.0907509	0.0355882	0.0355882
DOC2A	ENST00000350119.9	0.000196826	0.00877399	3.79283	1.01874	1.66005	3.59617	0.508577	0.0639787	1.04817	1.04817
ARFGAP1	ENST00000519531.5	0.000196908	0.00877399	0.770936	0.207077	5.37033	0.165376	0.00918918	0.0547307	0.055132	0.055132
SH3BP1	ENST00000649765.1	0.000197183	0.00877429	1.93815	0.520643	6.07963	1.22227	0.370303	-0.117256	0.0363013	0.0363013
HDGFL2	ENST00000621835.4	0.000198143	0.00880506	0.773808	0.207936	6.26235	0.16545	0.0313566	-0.0187806	0.0334995	0.0334995
VWA1	ENST00000471398.1	0.000199684	0.00884951	3.66327	0.984905	1.46551	2.97714	0.28496	0.00883308	1.1701	1.1701
SLC45A4	ENST00000519067.5	0.000202626	0.00894959	0.649026	0.17467	5.8342	0.121662	0.00462241	0.0130284	0.0411422	0.0411422
USP19	ENST00000434032.6	0.00020388	0.00898676	5.08073	1.36793	3.19775	6.77131	2.43245	-1.90388	0.374417	0.374417
AMPD2	ENST00000342115.8	0.000203763	0.00898676	0.805592	0.216889	6.9299	0.272556	0.00924774	0.0613135	0.027139	0.0613135
PABPC1	ENST00000520142.1	0.000204582	0.00901167	3.55053	0.95617	1.57812	2.99766	0.273059	-0.165797	1.09833	1.09833
ACY1	ENST00000636358.2	0.000206463	0.00908839	0.824861	0.222276	5.6432	0.194105	0.0281065	0.0186624	0.0460034	0.0460034
FAAP20	ENST00000476803.1	0.000206824	0.00909816	1.35715	0.365756	4.37834	0.58953	0.0773384	0.0650165	0.123328	0.123328
PGGHG	ENST00000474221.5	0.000210313	0.00923304	1.16864	0.315313	5.25149	0.432766	0.0230147	0.126119	0.0600703	0.126119
PDLIM4	ENST00000379018.7	0.000216596	0.00948343	1.46094	0.394973	4.9514	0.885663	0.0393669	0.194638	0.0757373	0.194638
ZSWIM4	ENST00000254323.6	0.000217792	0.00952306	0.60442	0.16347	6.03237	0.106406	0.00295509	0.0232626	0.0371287	0.0371287
MAPK12	ENST00000467891.5	0.00021779	0.00952306	4.21803	1.1408	2.18934	4.85111	1.18996	-0.964529	0.762175	0.762175
NIBAN2	ENST00000373312.4	0.000219079	0.00957293	0.833109	0.225412	7.83495	0.242355	0.0082956	0.0679204	0.0249158	0.0679204
OSBPL7	ENST00000007414.8	0.00022015	0.00959584	0.724438	0.196075	5.48126	0.141513	0.00659404	0.0331219	0.0510742	0.0510742
TCF3	ENST00000610756.4	0.000219848	0.00959584	0.934333	0.252861	5.31823	0.278387	0.0330806	0.0628275	0.0572182	0.0628275
IER2	ENST00000292433.4	0.000223843	0.00973563	1.23595	0.334902	6.89173	0.427078	0.00487685	0.163363	0.0273784	0.163363
TCEAL2	ENST00000372780.6	0.000224397	0.00974028	3.50863	0.950889	2.18866	4.04906	0.593781	0.181741	0.762504	0.762504
DCAF5	ENST00000557386.5	0.000225228	0.00976987	0.781647	0.211892	6.54407	0.242942	0.0214417	0.0459054	0.0301965	0.0459054
HES4	ENST00000481869.1	0.00022564	0.00978125	1.25016	0.338941	5.35307	0.450316	0.0114049	0.160917	0.0558099	0.160917
AKT1S1	ENST00000344175.9	0.000227023	0.00982822	0.728199	0.197511	6.71574	0.160293	0.0111835	0.0473323	0.0286558	0.0473323
TSPO	ENST00000337554.8	0.000228881	0.00989555	1.48659	0.403437	4.9405	0.731957	0.0225308	0.221611	0.0764043	0.221611
CACNA1C	ENST00000616390.1	0.000230602	0.0099437	4.39305	1.19283	1.50677	4.60756	0.990828	0.327852	1.14342	1.14342
CACNA1C	ENST00000644343.1	0.000230602	0.0099437	4.39305	1.19283	1.50677	4.60756	0.990828	0.327852	1.14342	1.14342
KLHL17	ENST00000338591.8	0.000231239	0.00995371	0.943774	0.256308	4.87743	0.199143	0.0181264	0.000887225	0.080414	0.080414
SIPA1	ENST00000394224.3	0.000234758	0.0100548	4.55406	1.23807	2.21776	5.21557	1.55069	-0.986875	0.748548	0.748548
HNRNPA1	ENST00000547566.5	0.00023454	0.0100548	0.644149	0.175108	8.72994	0.142547	0.000641099	0.0453532	0.0290498	0.0453532
GMIP	ENST00000203556.9	0.000234784	0.0100548	0.708499	0.192615	6.00189	0.18237	0.00563134	0.0500196	0.037687	0.0500196
REG3G	ENST00000393897.6	0.000234868	0.0100548	3.27911	0.891493	2.09005	3.3459	0.370192	0.821949	0.811113	0.821949
PKP1	ENST00000367324.7	0.000235934	0.0100678	3.08256	0.838321	1.86728	3.40797	0.118691	0.935481	0.928682	0.935481
PATZ1	ENST00000215919.3	0.000235903	0.0100678	0.790755	0.215049	5.60155	0.206002	0.0142441	0.0551248	0.0472172	0.0551248
TRIM27	ENST00000437160.6	0.000235941	0.0100678	1.55444	0.422739	5.02073	0.857882	0.196396	-0.00268459	0.0716663	0.0716663
TRIM27	ENST00000400720.7	0.000235941	0.0100678	1.55444	0.422739	5.02073	0.857882	0.196396	-0.00268459	0.0716663	0.0716663
TMED2	ENST00000544188.1	0.000236704	0.0100937	3.88088	1.05567	3.11446	5.29238	0.850374	0.821277	0.399806	0.821277
RAC1	ENST00000356142.4	0.000237207	0.0100955	0.966305	0.262891	6.29425	0.260234	0.00920211	0.0944653	0.0330687	0.0944653
SUPT20H	ENST00000475892.5	0.000237583	0.0101049	0.790981	0.215216	6.11953	0.176185	0.0338395	0.0102909	0.0356375	0.0356375
FAM187A	ENST00000331733.4	0.000240366	0.0101968	4.7839	1.30269	2.13945	5.19371	1.75901	-0.952747	0.786504	0.786504
MAFB	ENST00000373313.3	0.000240275	0.0101968	0.913214	0.248669	4.84026	0.245951	0.00985245	0.0695854	0.082902	0.082902
SEC61B	ENST00000223641.5	0.000241514	0.010219	0.591546	0.161136	7.37914	0.113805	0.000695552	0.0382517	0.0252423	0.0382517
BAG6	ENST00000415170.5	0.00024337	0.010271	0.65175	0.17763	5.78959	0.138649	0.00474679	0.042582	0.0421818	0.042582
BAG6	ENST00000451042.5	0.00024337	0.010271	0.65175	0.17763	5.78959	0.138649	0.00474679	0.042582	0.0421818	0.042582
BAG6	ENST00000438641.5	0.00024337	0.010271	0.65175	0.17763	5.78959	0.138649	0.00474679	0.042582	0.0421818	0.042582
PRAG1	ENST00000622241.1	0.000243649	0.0102761	1.26906	0.345901	6.86758	0.498527	0.143354	0.0361167	0.0275366	0.0361167
ARHGEF26	ENST00000356448.8	0.000244166	0.0102913	4.87932	1.33013	1.93165	6.53147	1.28239	1.37148	0.893586	1.37148
RHOB	ENST00000272233.5	0.000244331	0.0102913	0.948773	0.258653	8.05333	0.247672	0.000357299	0.0999947	0.0253125	0.0999947
SLC12A9	ENST00000354161.8	0.000244482	0.0102913	0.71179	0.194055	6.24895	0.174787	0.00515733	0.0513289	0.0336853	0.0513289
DOCK6	ENST00000587656.5	0.000245058	0.0103057	1.68057	0.458249	4.88923	0.759714	0.235344	0.0292236	0.0796444	0.0796444
ENC1	ENST00000651128.1	0.000245139	0.0103057	1.22335	0.333585	6.66737	0.454562	0.00698743	0.159931	0.0290592	0.159931
CDK18	ENST00000360066.6	0.000246054	0.0103309	1.2559	0.342549	5.57969	0.557665	0.0112749	0.164735	0.0478785	0.164735
RHOA	ENST00000431929.2	0.000246664	0.0103499	1.04223	0.284319	4.60141	0.265166	0.0199333	-0.00109568	0.101323	0.101323
SPRED3	ENST00000338502.8	0.000247429	0.0103754	0.907477	0.247613	5.4126	0.289242	0.00567022	0.0862978	0.053526	0.0862978
SNX33	ENST00000569152.1	0.000248106	0.0103904	0.77567	0.211688	5.3952	0.160085	0.0130399	0.0133502	0.054178	0.054178
NEDD4	ENST00000648451.1	0.000248269	0.0103906	5.01334	1.36825	4.11546	7.75942	1.80146	1.00672	0.160116	1.00672
IDH2	ENST00000560061.1	0.000249185	0.0104223	1.09169	0.298022	6.52119	0.353327	0.0802581	0.052968	0.0304261	0.052968
DDR1	ENST00000412329.5	0.000249899	0.0104388	5.29883	1.44683	2.23583	7.79538	2.08711	1.05288	0.739985	1.05288
SKP2	ENST00000274255.10	0.0002509	0.0104673	0.856509	0.233933	5.97056	0.239846	0.0438049	-0.00503229	0.0382822	0.0382822
VAT1	ENST00000355653.8	0.000251458	0.0104772	0.667632	0.182375	8.79388	0.136842	0.000183151	0.0497077	0.0296272	0.0497077
PUF60	ENST00000612237.3	0.000251695	0.0104804	5.08816	1.39001	3.26758	7.28993	2.54415	-1.09519	0.354026	0.354026
RGMA	ENST00000542321.6	0.000254516	0.010571	2.15113	0.588116	3.8318	1.84026	0.22711	0.29171	0.214092	0.29171
HOXC4	ENST00000430889.3	0.000256099	0.0106232	2.78643	0.762135	2.14279	2.82261	0.0864163	0.707921	0.784859	0.784859
KCNS3	ENST00000403915.5	0.000255986	0.0106232	4.195	1.14737	1.93647	4.33625	1.08369	-0.55098	0.890991	0.890991
HSPG2	ENST00000486901.1	0.000257047	0.0106491	1.39714	0.382241	6.50676	0.600148	0.0151645	0.203997	0.0305742	0.203997
SREBF1	ENST00000261646.9	0.000259421	0.0107338	0.604805	0.165574	7.05586	0.134434	0.0061662	0.034956	0.0264394	0.034956
ZBTB7B	ENST00000368426.3	0.000259638	0.010736	0.647048	0.177149	6.30113	0.0956317	0.0140948	-0.00122802	0.0329779	0.0329779
CHST15	ENST00000435907.6	0.00026028	0.0107558	0.780345	0.21368	6.25358	0.198745	0.00457178	0.0639172	0.0336207	0.0639172
SNRPB	ENST00000438552.6	0.000263594	0.0108535	1.01457	0.278065	5.65278	0.318567	0.0324151	0.0835653	0.0457327	0.0835653
AMN	ENST00000541086.5	0.000264664	0.0108888	3.5968	0.986064	1.49669	3.52806	0.230419	1.22806	1.14989	1.22806
AGRN	ENST00000379370.7	0.000265398	0.0109122	1.05201	0.288464	9.27897	0.416125	0.000922323	0.123895	0.0356066	0.123895
ACTB	ENST00000642480.1	0.000265736	0.0109192	1.24634	0.341782	4.39703	0.365301	0.0540228	-0.0269646	0.121199	0.121199
KRT13	ENST00000246635.8	0.000267809	0.0109852	3.86939	1.06168	1.76542	3.83104	0.70459	-0.162899	0.986153	0.986153
SEMA3D	ENST00000484038.1	0.000267846	0.0109852	1.3778	0.378041	4.72816	0.799322	0.123374	0.076224	0.0909988	0.0909988
SIX5	ENST00000317578.7	0.0002718	0.0111195	0.770547	0.211643	5.93146	0.187882	0.0281329	0.0133252	0.0390559	0.0390559
DDR1	ENST00000548133.4	0.000273485	0.0111745	0.898848	0.24699	7.23185	0.282144	0.0658219	-0.0040635	0.0256844	0.0256844
WNT9B	ENST00000290015.7	0.000273822	0.0111813	3.37966	0.928763	2.25138	3.4761	0.0554872	1.23841	0.732671	1.23841
ARF5	ENST00000415666.1	0.000274229	0.0111909	3.79431	1.04282	2.50215	3.75964	1.0092	-0.12304	0.622019	0.622019
FARP1	ENST00000627049.2	0.00027705	0.0112569	0.736284	0.202506	8.15664	0.227272	0.0106224	0.0508906	0.025629	0.0508906
FAM222B	ENST00000452648.7	0.000278673	0.0113018	0.64349	0.177057	6.12851	0.160238	0.0115317	0.0130356	0.0354922	0.0354922
KIT	ENST00000412167.6	0.000280771	0.0113447	3.51665	0.968126	2.54502	3.70361	0.801536	0.436783	0.604367	0.604367
PAPSS1	ENST00000265174.5	0.00028068	0.0113447	0.749155	0.206236	7.95946	0.202547	0.000604894	0.0631952	0.0250973	0.0631952
GNPDA1	ENST00000500692.6	0.000280391	0.0113447	4.49972	1.23865	3.60899	6.5414	2.03615	-0.163799	0.265219	0.265219
RNF145	ENST00000611185.4	0.000282242	0.0113887	0.603241	0.166133	7.36211	0.143296	0.0161154	0.0169065	0.0252848	0.0252848
NA	ENST00000405097.5	0.000282382	0.0113887	4.47641	1.23285	2.09139	5.11276	1.46943	-0.557362	0.810442	0.810442
SCARA3	ENST00000301904.4	0.000284173	0.0114539	0.81646	0.224962	6.81328	0.264401	0.00146296	0.0744492	0.0279119	0.0744492
TPR	ENST00000467810.1	0.000284509	0.0114604	4.33495	1.19453	1.48724	4.78211	0.984342	0.693363	1.156	1.156
DCX	ENST00000371993.6	0.000286446	0.0115113	4.57662	1.26173	2.55195	6.10835	1.7864	-1.62461	0.601546	0.601546
MXRA8	ENST00000473097.5	0.000292971	0.0117147	3.27213	0.903544	3.55925	3.44343	0.87826	0.346326	0.277339	0.346326
CEBPB	ENST00000303004.4	0.000293471	0.0117276	0.612179	0.169064	6.46158	0.127575	0.00141711	0.0414567	0.031054	0.0414567
MTA1	ENST00000331320.12	0.000294709	0.0117698	1.01335	0.279939	6.71115	0.263919	0.088856	0.00460678	0.0286932	0.0286932
HECTD4	ENST00000651701.1	0.000295431	0.0117915	0.991559	0.273966	5.90208	0.273994	0.0503024	0.0622839	0.0396613	0.0622839
RTN4RL2	ENST00000335099.8	0.000296479	0.0118261	2.01922	0.558049	3.71253	1.15445	0.0689712	0.398157	0.240701	0.398157
EPN2	ENST00000395618.7	0.000297331	0.0118456	4.41132	1.2194	2.21539	5.52876	1.48073	-0.456087	0.749679	0.749679
MFAP2	ENST00000375535.3	0.000298124	0.0118628	1.28801	0.356107	7.4512	0.695021	0.00381165	0.186406	0.0250869	0.186406
ACTN4	ENST00000252699.7	0.000299743	0.0118983	0.819822	0.226751	8.19783	0.206971	0.000578001	0.0765457	0.025779	0.0765457
PRMT2	ENST00000397638.6	0.000299434	0.0118983	4.95833	1.3713	4.09476	7.74131	0.937764	1.88293	0.163562	1.88293
CSNK1E	ENST00000396832.6	0.000299549	0.0118983	1.19476	0.330438	6.7865	0.374841	0.135677	-0.10469	0.0281071	0.0281071
ACTN4	ENST00000634960.2	0.000299743	0.0118983	0.819822	0.226751	8.19783	0.206971	0.000578001	0.0765457	0.025779	0.0765457
AGRN	ENST00000461111.1	0.000301058	0.011936	1.07133	0.296408	5.2594	0.325262	0.0157194	0.116067	0.0597212	0.116067
SERPINA4	ENST00000298841.5	0.00030128	0.0119376	4.41489	1.22154	1.94139	4.52168	1.34989	-0.741018	0.888355	0.888355
IP6K2	ENST00000416707.1	0.000302074	0.0119476	0.905597	0.250614	5.15063	0.236502	0.02942	0.0117859	0.064791	0.064791
MBNL3	ENST00000436215.5	0.00030208	0.0119476	3.81731	1.0564	1.68373	3.6126	0.639974	-0.123829	1.034	1.034
LIMD2	ENST00000583211.5	0.000305335	0.0120371	1.5284	0.423295	5.4726	0.712317	0.0471646	0.221603	0.0513732	0.221603
MEGF6	ENST00000485002.6	0.000307414	0.0121001	3.72126	1.03111	3.05107	5.23392	0.506958	1.08783	0.419909	1.08783
PEX12	ENST00000586663.2	0.00030866	0.0121272	3.99598	1.10756	2.17312	4.99918	1.07	-0.658126	0.770025	0.770025
CASP6	ENST00000265164.7	0.00030939	0.0121486	0.617725	0.171243	6.11778	0.10227	0.00832009	0.0249603	0.035666	0.035666
CRABP1	ENST00000299529.7	0.000315547	0.0123459	4.03823	1.12105	3.58503	5.05962	0.110371	1.77475	0.271035	1.77475
ALG3	ENST00000397676.7	0.000318614	0.0124263	0.627586	0.174345	6.02227	0.128486	0.00828285	0.0235568	0.0373115	0.0373115
MCCC2	ENST00000628716.2	0.000319447	0.0124464	4.09474	1.13774	2.19781	5.21843	1.1836	-0.552311	0.758095	0.758095
YWHAB	ENST00000479421.5	0.00032004	0.0124547	1.71215	0.475795	4.89285	0.889013	0.260162	-0.135444	0.0794095	0.0794095
TFAP4	ENST00000204517.11	0.000320806	0.0124771	0.915347	0.254412	4.89594	0.275749	0.0164696	0.0806186	0.0792107	0.0806186
IKZF4	ENST00000547167.6	0.000321437	0.0124794	4.87189	1.35429	2.29231	5.46438	2.03745	-1.59134	0.713691	0.713691
SP1	ENST00000327443.9	0.000323181	0.012524	0.816522	0.227066	7.55785	0.282129	0.0524092	0.00446189	0.024929	0.024929
TICAM1	ENST00000248244.5	0.00032883	0.0126987	1.06041	0.295259	5.43838	0.375691	0.00968716	0.121079	0.0525832	0.121079
SEMA4G	ENST00000210633.3	0.000329183	0.0127048	0.916108	0.255099	5.71818	0.232486	0.0446631	0.0529503	0.0439636	0.0529503
ANKS1A	ENST00000360359.5	0.000330624	0.0127529	0.710959	0.198036	7.38522	0.24258	0.000928648	0.0578989	0.0252277	0.0578989
CERS4	ENST00000561053.5	0.000332578	0.0128078	3.17379	0.884432	2.31543	3.25913	0.470192	0.340526	0.703138	0.703138
LZTR1	ENST00000643710.1	0.000332897	0.0128078	4.38524	1.22211	1.48672	4.68295	1.08399	0.351882	1.15633	1.15633
CPZ	ENST00000360986.9	0.000332655	0.0128078	5.23017	1.4575	4.6694	9.71935	0.128367	3.05811	0.0956226	3.05811
PDZD4	ENST00000164640.8	0.000333025	0.0128078	4.32281	1.20474	3.28687	5.87431	1.82858	0.148493	0.348538	0.348538
ZMIZ2	ENST00000478045.5	0.000333923	0.0128348	0.996014	0.277638	5.19998	0.282341	0.0532071	0.0495292	0.0624173	0.0624173
MSL3	ENST00000398527.7	0.000334493	0.0128491	3.8733	1.07981	2.01396	4.6908	0.898947	-0.175951	0.850048	0.850048
YPEL3	ENST00000398841.5	0.000337756	0.0129543	1.11964	0.312359	4.74957	0.320942	0.0569715	0.0484414	0.0893807	0.0893807
TMEM189	ENST00000453505.6	0.000344383	0.0131672	0.939428	0.262454	6.00672	0.260052	0.065726	0.0230685	0.0375971	0.0375971
TNC	ENST00000498724.5	0.000346416	0.0131833	3.44018	0.961519	3.66548	4.4411	0.62743	0.759348	0.251705	0.759348
EBPL	ENST00000242827.11	0.000351363	0.0133031	1.44997	0.405681	4.89844	0.577339	0.167817	-0.0627697	0.0790496	0.0790496
KANSL3	ENST00000425656.5	0.0003512	0.0133031	3.70188	1.0357	1.70281	3.46551	0.586345	-0.282767	1.02267	1.02267
VOPP1	ENST00000285279.10	0.000351596	0.0133031	0.76467	0.213955	7.4486	0.165012	0.0126729	0.055992	0.0250918	0.055992
CLEC1B	ENST00000298527.10	0.000354063	0.0133826	3.69689	1.03492	1.55675	3.80621	0.494888	0.679814	1.1117	1.1117
NA	ENST00000642303.1	0.000354486	0.0133893	3.89934	1.09169	1.95932	4.22884	0.908901	-0.553427	0.878781	0.878781
STT3A	ENST00000531491.5	0.000357239	0.0134777	0.597738	0.167442	7.66714	0.125264	0.00477861	0.0372769	0.0248554	0.0372769
TXNRD3	ENST00000523403.2	0.000358712	0.0135177	4.25345	1.19187	2.34597	6.19284	1.44144	-0.20466	0.689375	0.689375
KCNK1	ENST00000366621.7	0.00035924	0.0135298	0.941232	0.263772	5.06896	0.334787	0.0353607	0.0577989	0.0690031	0.0690031
YIPF3	ENST00000510102.5	0.000360792	0.0135804	3.98829	1.11804	1.43055	4.18887	0.681963	0.876231	1.19306	1.19306
STXBP2	ENST00000221283.10	0.000362438	0.0136345	0.795218	0.222999	6.73906	0.205153	0.00369129	0.0709012	0.0284697	0.0709012
ATIC	ENST00000443953.5	0.000370187	0.0138307	3.94935	1.10922	1.96	4.18327	0.967138	-0.669765	0.878418	0.878418
HNRNPL	ENST00000221419.9	0.000373667	0.0138814	0.953202	0.267903	4.8174	0.244281	0.0231783	0.0268943	0.0844796	0.0844796
HNRNPL	ENST00000634753.1	0.000373667	0.0138814	0.953202	0.267903	4.8174	0.244281	0.0231783	0.0268943	0.0844796	0.0844796
SPHK1	ENST00000591762.1	0.000374424	0.0139017	1.71738	0.482752	3.65631	0.662247	0.0956977	0.0499142	0.253876	0.253876
CNIH2	ENST00000311445.7	0.000375597	0.0139373	1.27316	0.357964	4.76815	0.575763	0.104202	0.0132305	0.0880051	0.0880051
PGGHG	ENST00000476372.1	0.000376386	0.0139508	1.48115	0.41651	5.11037	0.588292	0.193399	-0.0594337	0.0668217	0.0668217
KDM2B	ENST00000542973.5	0.000377345	0.0139705	0.763594	0.214768	5.6316	0.15496	0.0228521	0.0102975	0.0463356	0.0463356
NYAP1	ENST00000300179.7	0.000378765	0.0140152	1.11743	0.314375	4.5479	0.420738	0.0421618	0.0646573	0.106086	0.106086
DUT	ENST00000455976.6	0.000379222	0.0140212	1.19399	0.335944	4.63108	0.414981	0.0304075	0.13888	0.0987879	0.13888
FANCG	ENST00000378643.7	0.000379357	0.0140212	0.892379	0.251088	5.19373	0.199864	0.031857	0.0176175	0.0627111	0.0627111
AXIN2	ENST00000375702.5	0.000379896	0.0140253	3.82782	1.07715	2.57851	4.88685	1.14955	-0.435533	0.590815	0.590815
MEST	ENST00000223215.9	0.000380281	0.0140316	2.14217	0.60285	8.14072	2.09175	0.014656	0.530485	0.0255747	0.530485
CFI	ENST00000512148.5	0.000381741	0.0140696	4.02245	1.13232	4.72251	5.83628	1.10256	0.820665	0.0914319	0.820665
IL1R1	ENST00000410023.6	0.000383671	0.0141248	1.6145	0.454652	6.60023	1.10578	0.00554034	0.304522	0.0296582	0.304522
EPN2	ENST00000571254.1	0.000384027	0.01413	3.65814	1.03022	2.93691	4.69089	1.13423	0.435226	0.457808	0.457808
MAGI3	ENST00000307546.14	0.000389978	0.0143007	1.0233	0.288515	6.15954	0.361882	0.0284762	0.096385	0.0350021	0.096385
GRAMD1A	ENST00000411896.6	0.000392817	0.0143726	0.785519	0.221594	6.5136	0.204228	0.0231348	0.0505207	0.0305037	0.0505207
MYD88	ENST00000652213.1	0.000392644	0.0143726	4.33076	1.22166	3.56591	6.01218	0.743952	1.49473	0.275705	1.49473
CAPN15	ENST00000565010.1	0.000395253	0.0144412	0.748783	0.211328	5.40435	0.132697	0.0131555	0.021992	0.0538336	0.0538336
DTNB	ENST00000288642.12	0.000395522	0.0144412	3.8867	1.09699	3.06807	5.17823	1.39063	0.02756	0.414451	0.414451
DPYSL2	ENST00000311151.9	0.000395573	0.0144412	0.589261	0.166316	7.22949	0.0992332	0.00127523	0.0402163	0.0256929	0.0402163
FHL3	ENST00000373016.4	0.000395142	0.0144412	1.27192	0.358963	6.26144	0.531704	0.00541578	0.187866	0.0335121	0.187866
NFIB	ENST00000397581.6	0.000399071	0.0145526	4.16654	1.17676	2.84952	5.84561	1.58885	-1.1348	0.488285	0.488285
PDLIM4	ENST00000462597.1	0.000400705	0.0146041	2.43944	0.689182	2.97754	1.62528	0.268387	-0.011151	0.44407	0.44407
JDP2	ENST00000267569.5	0.00040158	0.0146278	0.755543	0.213488	6.15871	0.22129	0.00323915	0.0651265	0.0350151	0.0651265
DAPK1	ENST00000408954.8	0.000406729	0.0147907	1.09584	0.309939	7.45543	0.544766	0.0282514	0.115842	0.025079	0.115842
RHOF	ENST00000537171.5	0.000407682	0.0148162	2.73766	0.774431	2.15652	2.74699	0.121491	0.738525	0.778123	0.778123
CYP26A1	ENST00000224356.5	0.000408918	0.0148291	3.46236	0.979655	3.02697	3.33693	0.419342	1.02024	0.427728	1.02024
TLN2	ENST00000636159.1	0.000413607	0.014972	5.82164	1.64861	2.79481	9.42431	1.81599	2.26087	0.508007	2.26087
SLX1A	ENST00000251303.10	0.000414229	0.014972	3.91606	1.1091	4.35673	5.0526	1.71928	-0.263446	0.125868	0.125868
RPL28	ENST00000560583.5	0.000420788	0.0151588	0.874243	0.247893	5.31465	0.282477	0.0348107	0.0440709	0.0573659	0.0573659
ACTG1	ENST00000575842.5	0.000421982	0.0151816	1.20749	0.342459	5.04105	0.415906	0.0676802	0.108237	0.0705282	0.108237
DGUOK	ENST00000418996.5	0.000422116	0.0151816	0.670938	0.190291	5.70778	0.175655	0.01008	0.0427008	0.0442359	0.0442359
ODF2	ENST00000372814.7	0.000423819	0.0152177	4.20472	1.1929	1.81875	3.72358	1.17874	-1.13705	0.955767	0.955767
TMEM175	ENST00000515740.5	0.000424313	0.0152271	4.65577	1.32098	1.67668	5.41482	1.57929	0.216163	1.0382	1.0382
GMPPB	ENST00000308388.6	0.000424727	0.0152336	0.782655	0.222079	5.34345	0.247472	0.0177852	0.039717	0.0561933	0.0561933
PKNOX2	ENST00000298282.14	0.000426496	0.015272	1.36819	0.388346	5.87219	0.758496	0.00660333	0.219615	0.040299	0.219615
PCDHGA3	ENST00000253812.7	0.000426445	0.015272	0.865772	0.245738	5.79324	0.255301	0.0484859	0.00730098	0.0420947	0.0420947
PRR36	ENST00000618550.5	0.000430849	0.0154026	0.712241	0.202316	6.91396	0.149969	0.00115678	0.0602412	0.0272373	0.0602412
C1QTNF6	ENST00000337843.7	0.000434792	0.0154927	1.3802	0.392323	6.81203	0.760383	0.00202677	0.228849	0.0279208	0.228849
CUX1	ENST00000487284.2	0.000440385	0.015641	3.76876	1.07231	2.74758	4.27191	1.04167	0.683096	0.525418	0.683096
KIAA1522	ENST00000401073.7	0.000441594	0.0156754	1.1097	0.315804	7.09765	0.383096	0.0174424	0.132156	0.0262372	0.132156
ATP11C	ENST00000370557.5	0.000442902	0.0156963	0.914429	0.260291	5.13568	0.32119	0.0360921	0.0436954	0.0655348	0.0655348
ABCF1	ENST00000376545.7	0.000450396	0.0159274	5.47789	1.56126	2.97632	7.73126	3.2118	-2.85754	0.444479	0.444479
SAMD11	ENST00000455979.1	0.000451464	0.0159451	3.16914	0.903401	2.26646	3.22114	0.498565	0.34214	0.725635	0.725635
SMARCD2	ENST00000613943.4	0.000453313	0.0159701	0.788988	0.22498	6.36188	0.1757	0.0199017	0.0560222	0.0322068	0.0560222
KLHL36	ENST00000564996.6	0.000454572	0.0159919	0.723151	0.20625	6.97968	0.203366	0.00830407	0.0555044	0.0268461	0.0555044
APBA3	ENST00000316757.4	0.000454909	0.0159919	0.732623	0.208963	5.31529	0.143396	0.00815893	0.00769115	0.0573395	0.0573395
RBCK1	ENST00000382214.7	0.000455923	0.0160104	4.69966	1.34069	1.95072	6.35793	1.36128	1.3349	0.883366	1.3349
DICER1	ENST00000556045.5	0.000460087	0.0161184	4.4173	1.26101	3.73993	6.12372	1.09887	1.28636	0.234415	1.28636
TMSB4X	ENST00000380636.1	0.000461613	0.0161409	0.839304	0.239657	4.95589	0.174984	0.0106889	0.0454412	0.0754647	0.0754647
DCN	ENST00000547568.6	0.000462763	0.0161685	3.67735	1.05024	3.9638	6.18264	0.196535	1.45797	0.187205	1.45797
NME4	ENST00000219479.7	0.000463391	0.0161685	0.590387	0.16863	7.56696	0.123564	0.000899896	0.0417544	0.0249194	0.0417544
U2AF2	ENST00000590551.1	0.000463755	0.0161726	0.651081	0.185977	6.23683	0.133903	0.0138625	0.0380188	0.0338558	0.0380188
LPAR2	ENST00000407877.8	0.000464683	0.0161962	1.05994	0.302812	5.23508	0.316487	0.0274094	0.110133	0.0608038	0.110133
PIM3	ENST00000360612.5	0.000465009	0.0161962	0.735077	0.210014	6.42987	0.171628	0.00178941	0.0643691	0.0314062	0.0643691
GABRP	ENST00000521481.5	0.000468796	0.0162704	0.999214	0.285654	4.69749	0.289321	0.0186928	0.103705	0.0933789	0.103705
TMEM25	ENST00000313236.10	0.000472341	0.0163674	4.46907	1.27835	3.71237	6.49507	0.904925	1.54634	0.240739	1.54634
MYADM	ENST00000421337.6	0.000473151	0.0163868	1.03477	0.296027	5.43551	0.367972	0.0738558	0.0575923	0.0526869	0.0575923
LHPP	ENST00000368842.10	0.00047645	0.0164836	0.818966	0.234415	5.05389	0.235907	0.0126044	0.0448623	0.0698212	0.0698212
AMOTL1	ENST00000433060.3	0.000476954	0.0164836	0.663392	0.1899	8.06849	0.230476	0.00625591	0.0478371	0.0253536	0.0478371
NA	ENST00000646646.1	0.000479454	0.0165525	4.38735	1.25641	3.58314	7.309	2.09634	-0.575217	0.271495	0.271495
THBS3	ENST00000368378.7	0.000482034	0.0166153	1.19475	0.342283	6.38906	0.475284	0.0138505	0.161886	0.0318791	0.161886
VPS54	ENST00000272322.9	0.000482732	0.0166219	0.609095	0.174518	6.39521	0.128981	0.0138783	0.00952875	0.0318064	0.0318064
CTU1	ENST00000421832.3	0.000486033	0.0167179	0.982019	0.281515	4.56831	0.245332	0.0146368	0.0498571	0.104239	0.104239
ZNF444	ENST00000337080.8	0.000489198	0.0168085	0.651552	0.186873	6.20843	0.0997138	0.0181171	0.00696731	0.0342652	0.0342652
ZNF775	ENST00000329630.10	0.000495502	0.0169546	0.718083	0.206158	5.3197	0.165625	0.0065939	0.00223306	0.0571575	0.0571575
NA	ENST00000259806.2	0.000498104	0.0170347	0.770208	0.221211	5.16816	0.423587	0.00946817	0.0401077	0.0639335	0.0639335
RAB40B	ENST00000538809.6	0.000504427	0.017206	3.58783	1.03146	1.64779	3.22252	0.540296	-0.359423	1.05557	1.05557
ELF4	ENST00000335997.11	0.000507062	0.0172868	1.01802	0.292787	6.25833	0.343572	0.0950316	0.0094703	0.0335549	0.0335549
SYT10	ENST00000228567.7	0.0005074	0.017287	2.15902	0.620977	3.39376	1.63779	0.259186	-0.173675	0.319233	0.319233
TNFRSF10B	ENST00000523504.5	0.000507888	0.017288	3.56158	1.02446	2.6664	3.95975	0.977433	0.596831	0.556206	0.596831
CLSTN1	ENST00000435891.5	0.000512006	0.017401	0.755138	0.217344	7.17811	0.160109	0.017697	0.0531605	0.0258883	0.0531605
CCDC120	ENST00000606812.5	0.000519943	0.0176341	1.17111	0.33747	5.93267	0.424247	0.0745485	0.0962804	0.0390315	0.0962804
NCKAP5L	ENST00000433948.5	0.000522204	0.0177017	0.63472	0.182964	6.10004	0.0994115	0.0142559	0.0154423	0.0359578	0.0359578
PHLDB1	ENST00000614369.4	0.000522862	0.0177148	4.89957	1.41248	1.87473	6.02516	2.0681	-0.077838	0.924571	0.924571
MAPK15	ENST00000338033.9	0.000523875	0.0177399	3.67803	1.06049	2.00327	3.43614	0.831332	0.220124	0.855618	0.855618
DVL3	ENST00000478247.1	0.000529099	0.0178706	1.25648	0.36256	5.75844	0.509939	0.0417352	0.15544	0.0429406	0.15544
ADAMTS10	ENST00000593913.5	0.00053359	0.0179944	3.64324	1.05195	1.65703	3.35789	0.609923	-0.289165	1.04999	1.04999
H3-3B	ENST00000589599.5	0.000536026	0.0180487	0.931666	0.269106	7.10916	0.258791	0.00294188	0.105685	0.026184	0.105685
RABEPK	ENST00000628863.2	0.000536957	0.0180707	3.86021	1.11515	1.75713	3.5891	0.874409	-0.626007	0.990932	0.990932
ST3GAL5	ENST00000639867.1	0.000537875	0.018083	4.3399	1.25389	1.76185	5.4831	0.947322	1.41104	0.988212	1.41104
C11orf24	ENST00000304271.11	0.000539565	0.0181119	0.640618	0.185134	6.8838	0.171009	0.000994937	0.0504167	0.0274297	0.0504167
PLA2G4A	ENST00000367466.4	0.000544396	0.0181716	1.32841	0.384166	3.97412	0.488734	0.0361454	0.0843132	0.18523	0.18523
CTSD	ENST00000637937.1	0.000543702	0.0181716	0.846922	0.244899	6.16726	0.180278	0.0550806	-0.0113202	0.0348829	0.0348829
MLXIP	ENST00000319080.12	0.000544034	0.0181716	0.590492	0.170757	7.28757	0.101717	0.000388551	0.0433485	0.0254973	0.0433485
YDJC	ENST00000473985.1	0.000543962	0.0181716	4.47866	1.29512	1.84274	5.84582	1.19438	1.3216	0.942311	1.3216
DENND2A	ENST00000275884.10	0.000544322	0.0181716	4.06618	1.1759	3.00783	5.21983	1.64009	0.0192459	0.434009	0.434009
MLXIP	ENST00000629738.3	0.000544034	0.0181716	0.590492	0.170757	7.28757	0.101717	0.000388551	0.0433485	0.0254973	0.0433485
ARHGEF40	ENST00000554514.1	0.000545232	0.0181903	1.57912	0.456724	4.85037	0.726857	0.144295	0.168601	0.0822161	0.168601
FMNL3	ENST00000550488.5	0.000547009	0.0182124	2.04161	0.590639	5.0409	1.60065	0.162697	0.360584	0.0705363	0.360584
INF2	ENST00000252527.8	0.000548931	0.0182671	0.943934	0.273155	6.11638	0.334818	0.0365789	0.0753418	0.0356888	0.0753418
EFEMP2	ENST00000531972.5	0.000550024	0.0182942	0.665763	0.192688	6.69843	0.189082	0.0166891	0.039004	0.0287975	0.039004
WASH6P	ENST00000492963.6	0.000553785	0.0183819	0.777114	0.225036	5.43331	0.177065	0.0208611	0.0551004	0.0527664	0.0551004
GABRG3	ENST00000615808.5	0.000554452	0.0183885	2.81333	0.814757	2.14334	2.18728	0.211157	0.420656	0.784587	0.784587
KIF17	ENST00000400463.7	0.000557699	0.018465	3.06369	0.887667	2.52401	3.62911	0.539678	0.642252	0.612974	0.642252
KCNH3	ENST00000257981.7	0.000558356	0.0184681	3.5781	1.03681	2.72902	4.05239	1.08009	0.105617	0.532362	0.532362
POMGNT2	ENST00000344697.3	0.000559461	0.0184859	0.894119	0.259124	5.72801	0.312636	0.0570086	0.00429329	0.0437093	0.0437093
PSD2	ENST00000274710.4	0.000559417	0.0184859	2.80156	0.811912	1.89921	2.46497	0.0776449	0.787365	0.911158	0.911158
MAPK1IP1L	ENST00000554364.1	0.000561268	0.0185269	0.81999	0.237701	5.17542	0.198182	0.0211696	0.0360753	0.063583	0.063583
MAGED1	ENST00000473931.1	0.000561025	0.0185269	0.99839	0.289406	4.70866	0.253914	0.0331301	0.00179083	0.0925037	0.0925037
RFC2	ENST00000621097.4	0.000562264	0.0185431	4.10954	1.19145	1.63742	4.93469	0.699499	1.42982	1.06186	1.42982
STMN3	ENST00000370053.3	0.000562991	0.0185464	1.07371	0.311324	5.40337	0.3947	0.00769919	0.137684	0.0538702	0.137684
ALDH2	ENST00000548536.1	0.000564521	0.0185781	0.586018	0.169953	6.54734	0.0979745	0.0131621	0.0137918	0.0301642	0.0301642
NR2F2	ENST00000394166.8	0.000569896	0.0186886	0.992349	0.288009	7.10091	0.299263	0.00160936	0.122814	0.026222	0.122814
TMEM130	ENST00000339375.8	0.000570985	0.0187062	3.59552	1.04368	2.75836	4.20806	0.633373	1.00054	0.521413	1.00054
JADE2	ENST00000395003.5	0.000571902	0.0187269	0.59445	0.172574	5.85365	0.140268	0.00396715	0.038806	0.0407057	0.0407057
TUBA1A	ENST00000550767.5	0.000573771	0.0187775	0.630778	0.183168	7.56981	0.118003	0.0200449	0.0302806	0.0249166	0.0302806
MYL6	ENST00000548400.5	0.000574669	0.0187893	1.0114	0.29373	5.89143	0.29551	0.0468289	0.0825873	0.039886	0.0825873
FKBP10	ENST00000489591.5	0.000581816	0.0189661	1.17916	0.342785	5.66128	0.418864	0.0173683	0.158884	0.045495	0.158884
NA	ENST00000614186.5	0.000581739	0.0189661	3.85117	1.11953	3.16727	5.03628	0.644482	1.23554	0.383572	1.23554
DKK1	ENST00000373970.4	0.000584514	0.0190351	0.962058	0.279774	5.54355	0.359118	0.00609657	0.111313	0.0490098	0.111313
RELL2	ENST00000297164.8	0.000584957	0.01904	3.90974	1.13705	1.95581	4.01657	1.05867	-0.457714	0.880647	0.880647
FAM160A2	ENST00000524416.1	0.000587781	0.0191225	1.05076	0.305703	4.54304	0.304566	0.0336501	0.0794252	0.106531	0.106531
LMNA	ENST00000368301.6	0.000589684	0.0191653	0.706948	0.205728	6.49138	0.135972	0.0327517	0.00758676	0.0307346	0.0307346
SPARC	ENST00000521569.1	0.000593025	0.0192501	1.16114	0.338052	8.92959	0.550703	0.00030695	0.171112	0.031003	0.171112
CHPF2	ENST00000035307.6	0.000593174	0.0192501	0.598449	0.174235	7.8077	0.151278	0.000610545	0.0449264	0.0248917	0.0449264
SRSF11	ENST00000395136.6	0.000594717	0.0192774	0.698851	0.203508	5.88959	0.1589	0.0107147	0.0514089	0.0399251	0.0514089
CABIN1	ENST00000337989.11	0.000595407	0.0192843	1.22935	0.358025	5.28153	0.480802	0.0530787	0.139194	0.058761	0.139194
FAM114A1	ENST00000358869.5	0.000596775	0.0193095	0.848993	0.247298	7.618	0.274876	0.000983523	0.090751	0.0248775	0.090751
XRCC6	ENST00000402580.7	0.000597374	0.0193193	5.33831	1.55509	2.79771	8.03017	3.12049	-0.0825725	0.506948	0.506948
MKNK2	ENST00000587416.5	0.000610566	0.0196723	3.73382	1.08957	2.37668	3.49986	1.10501	-0.122154	0.675736	0.675736
MICAL1	ENST00000358807.8	0.000611286	0.0196723	1.01587	0.29647	6.44938	0.322561	0.0102565	0.121585	0.031188	0.121585
ABCA2	ENST00000487109.5	0.000611292	0.0196723	4.57967	1.33652	1.87721	6.11916	1.24537	1.43408	0.923208	1.43408
KCNC3	ENST00000477616.1	0.000616825	0.0198406	0.671596	0.196138	5.43531	0.18896	0.00501104	0.0258156	0.052694	0.052694
HNF1A	ENST00000257555.10	0.000618156	0.0198736	5.34466	1.56116	2.32819	8.37194	0.100919	3.5549	0.697362	3.5549
CPAMD8	ENST00000651564.1	0.000619233	0.0198789	2.9188	0.85269	3.1605	3.23352	0.224033	0.866589	0.385627	0.866589
ARL6IP6	ENST00000326446.9	0.000622523	0.0199747	0.881603	0.257658	5.19322	0.240271	0.0120257	0.0875555	0.0627351	0.0875555
MTX1	ENST00000609421.1	0.00062808	0.020096	0.844558	0.247005	5.59376	0.262348	0.0115642	0.0799533	0.047451	0.0799533
OLFML2A	ENST00000373580.8	0.000628144	0.020096	0.840141	0.245715	7.272	0.292274	0.00797126	0.0825928	0.0255471	0.0825928
ATE1	ENST00000540606.5	0.00063288	0.020173	4.22776	1.23723	2.11169	4.68188	1.49584	-1.15411	0.800268	0.800268
SPPL2B	ENST00000589515.2	0.000639777	0.0203587	0.883936	0.258903	4.89407	0.172916	0.0212149	0.011209	0.0793309	0.0793309
BDNF	ENST00000533246.5	0.000642826	0.0204236	4.05723	1.1888	1.56385	4.59356	1.01264	0.840358	1.10725	1.10725
COL3A1	ENST00000317840.9	0.000643063	0.0204236	1.64526	0.482088	9.12968	1.94303	0.00264053	0.345973	0.0334377	0.345973
DALRD3	ENST00000498794.1	0.000643855	0.0204388	3.05939	0.896543	1.87591	2.4432	0.281762	0.556839	0.923922	0.923922
SLC66A2	ENST00000474967.5	0.000647011	0.020518	2.91651	0.855006	3.2561	2.95188	0.589448	0.507103	0.357321	0.507103
EPN1	ENST00000411543.6	0.000647112	0.020518	0.690575	0.202452	5.92961	0.15437	0.00755884	0.0539213	0.0390935	0.0539213
MAP2	ENST00000199940.10	0.000649371	0.020555	0.969453	0.284288	4.67539	0.234213	0.0260899	0.0482438	0.0951395	0.0951395
ANXA8	ENST00000611843.4	0.000649757	0.0205564	4.14523	1.21563	1.66634	5.06944	0.90406	1.31257	1.04439	1.31257
RTN2	ENST00000590526.5	0.000657239	0.020753	3.8766	1.13789	2.11526	4.82442	1.14371	-0.739422	0.79849	0.79849
ATF7-NPFF	ENST00000591834.1	0.000662171	0.0208986	3.392	0.996245	1.72276	3.77153	0.477824	0.119654	1.01093	1.01093
CALM1	ENST00000553630.1	0.000669272	0.0210922	0.655747	0.192761	6.57541	0.112696	0.0258434	0.013522	0.0298918	0.0298918
AKAP17A	ENST00000381261.8	0.000669057	0.0210922	1.03356	0.303814	4.94163	0.319245	0.0148347	0.12362	0.0763348	0.12362
PACC1	ENST00000467822.5	0.000671019	0.0211229	3.48029	1.02327	2.77298	3.96743	0.586334	0.984279	0.51601	0.984279
PLEKHG3	ENST00000247226.13	0.000680696	0.021362	0.630561	0.18561	6.66264	0.121867	0.00451806	0.0471584	0.0290998	0.0471584
DYNC1H1	ENST00000643829.1	0.000682037	0.021362	0.632913	0.186332	7.25831	0.109019	0.0264867	-0.00471667	0.0255925	0.0255925
PRKD2	ENST00000593363.1	0.000681025	0.021362	1.10982	0.326696	4.57342	0.353216	0.0563127	-0.0495658	0.103783	0.103783
HSD3B2	ENST00000369416.4	0.000681955	0.021362	2.38762	0.702917	3.27704	2.54889	0.389812	0.231162	0.351328	0.351328
NINJ1	ENST00000375446.5	0.000684381	0.0214137	1.00314	0.295411	6.20377	0.296287	0.003324	0.127577	0.0343335	0.127577
SERP1	ENST00000491660.1	0.000685278	0.0214315	1.29313	0.380847	4.3139	0.597626	0.0864105	0.0850597	0.131156	0.131156
DNM1	ENST00000628346.2	0.000691183	0.0215956	1.52316	0.448904	5.76472	0.910484	0.0232938	0.278979	0.0427854	0.278979
SORBS3	ENST00000517535.5	0.00069468	0.0216841	1.13632	0.335033	4.42569	0.36831	0.0503147	0.0286733	0.118056	0.118056
ATG16L2	ENST00000439504.6	0.000695838	0.0217098	2.11486	0.62363	4.03483	1.43536	0.40938	0.163223	0.173992	0.173992
NCLN	ENST00000246117.9	0.000698761	0.0217804	0.707705	0.208759	6.88467	0.161049	0.00367079	0.0616994	0.0274241	0.0616994
GUK1	ENST00000470040.5	0.000701563	0.0218261	1.22814	0.362394	4.18535	0.43532	0.0268066	0.170188	0.149073	0.170188
ZFAND2B	ENST00000409594.5	0.00070437	0.0218927	3.76615	1.11166	1.80184	3.91003	0.888338	-0.344235	0.965332	0.965332
FBRSL1	ENST00000542306.5	0.000705889	0.0219295	1.47909	0.436661	4.51994	0.509292	0.177332	-0.0691396	0.108677	0.108677
TMEM123	ENST00000361236.7	0.000706306	0.021932	1.18507	0.349876	5.16299	0.360472	0.119436	-0.0958857	0.0641846	0.0641846
ADAM10	ENST00000439637.5	0.000707016	0.0219437	4.1456	1.22403	3.63853	6.26931	0.777883	1.46949	0.258113	1.46949
SBF1	ENST00000418590.3	0.000708607	0.0219826	0.658826	0.19456	5.82841	0.111888	0.0155064	0.0251491	0.0412742	0.0412742
MACROH2A1	ENST00000510038.1	0.000709754	0.0220035	0.964459	0.284856	5.9742	0.320892	0.0280215	0.0936926	0.0382119	0.0936926
HLA-A	ENST00000638354.1	0.000713039	0.0220782	4.34553	1.28395	1.79125	5.61378	1.16771	1.30507	0.971351	1.30507
C4orf48	ENST00000409248.8	0.000714979	0.0221061	0.87322	0.258061	4.99857	0.322994	0.00948808	0.0904054	0.072936	0.0904054
TMEM54	ENST00000373463.8	0.000720324	0.0222302	0.961493	0.28432	5.41459	0.27529	0.00573543	0.115522	0.0534523	0.115522
SLC16A10	ENST00000612036.4	0.000721376	0.0222417	3.38535	1.00119	1.60327	3.06981	0.420818	-0.286383	1.08275	1.08275
ZNF503	ENST00000372524.5	0.000723885	0.0223085	0.871475	0.257805	6.87538	0.280285	0.00141123	0.0982837	0.0274849	0.0982837
ME2	ENST00000640530.1	0.000725422	0.0223389	3.45464	1.02215	2.97343	4.5614	0.913719	0.65346	0.445448	0.65346
ASMTL	ENST00000381317.9	0.00072577	0.0223389	0.62979	0.186347	6.65596	0.177606	0.00295118	0.0491368	0.0291577	0.0491368
PTCH1	ENST00000429896.6	0.000727234	0.0223539	0.765916	0.226663	5.87103	0.21101	0.0147344	0.0623296	0.0403242	0.0623296
CLEC16A	ENST00000261657.5	0.000728087	0.0223643	1.05458	0.31212	5.86584	0.366298	0.0819476	0.0641808	0.0404372	0.0641808
SLC39A1	ENST00000356205.9	0.000734778	0.0225212	0.599343	0.177517	7.70438	0.11957	0.000933608	0.0463346	0.0248507	0.0463346
MCRIP1	ENST00000570507.5	0.000734916	0.0225212	3.62845	1.07471	1.8055	3.94547	0.769246	-0.20532	0.963256	0.963256
NME3	ENST00000219302.7	0.000736016	0.0225233	0.909188	0.269325	5.00097	0.287336	0.036007	0.0243552	0.0727971	0.0727971
A1BG	ENST00000598345.1	0.000735494	0.0225233	0.998651	0.29581	4.48416	0.350515	0.0191584	0.0653055	0.112097	0.112097
TCAF1P1	ENST00000414990.3	0.000735797	0.0225233	0.68852	0.203953	5.6762	0.351169	0.00963009	0.052765	0.0450834	0.052765
CBARP	ENST00000650044.1	0.000739686	0.0226002	1.1721	0.347348	5.09289	0.344218	0.113245	-0.078198	0.0677308	0.0677308
RASA4	ENST00000461209.5	0.000739909	0.0226002	3.18064	0.942595	2.53147	3.6586	0.261257	1.07147	0.609907	1.07147
MRTFA	ENST00000620651.4	0.000741748	0.0226352	4.76195	1.41151	1.88026	5.8968	2.06699	0.124904	0.921533	0.921533
ARHGEF25	ENST00000286494.9	0.000743858	0.0226785	1.05898	0.313968	5.57476	0.570629	0.0192731	0.128591	0.04803	0.128591
SPARC	ENST00000539687.5	0.000745847	0.0226863	0.982062	0.291228	7.72656	0.430413	0.00170387	0.125516	0.0248528	0.125516
FAM160A2	ENST00000529360.1	0.000746467	0.0226946	1.35282	0.401201	4.20731	0.531615	0.0604749	0.180968	0.145793	0.180968
MED24	ENST00000394127.6	0.000750146	0.0227959	4.63887	1.37629	3.88748	6.9492	1.96584	0.875412	0.202396	0.875412
MARVELD3	ENST00000567566.1	0.000752064	0.0228224	3.34458	0.992498	2.23845	3.37646	0.436261	1.04132	0.738746	1.04132
INAFM1	ENST00000552360.3	0.000752988	0.0228292	0.700766	0.207972	5.26885	0.121622	0.00557038	0.0267322	0.0593081	0.0593081
GPR153	ENST00000377893.3	0.000752802	0.0228292	1.09987	0.32641	5.81098	0.40391	0.00399916	0.155816	0.0416765	0.155816
CXXC5	ENST00000302517.8	0.000754284	0.0228474	0.779152	0.231268	7.48371	0.19713	0.00170024	0.0785268	0.0250297	0.0785268
TMEM100	ENST00000424486.3	0.000758813	0.0229739	2.05637	0.610672	3.07367	1.26124	0.146715	0.318221	0.412665	0.412665
EFNA2	ENST00000215368.4	0.000762049	0.0230506	0.744072	0.221041	6.00489	0.170846	0.00330815	0.0699803	0.0376311	0.0699803
DYNC2H1	ENST00000375735.7	0.000764254	0.0230959	4.27742	1.27099	2.51066	6.78835	1.80464	-0.730889	0.618486	0.618486
PABPC1	ENST00000522387.5	0.000767317	0.0231671	1.41698	0.421179	5.19918	0.502336	0.203633	-0.112214	0.0624546	0.0624546
ADCY3	ENST00000435135.5	0.000769376	0.0232079	2.90768	0.86446	2.16551	2.9002	0.347204	0.342308	0.773732	0.773732
SOSTDC1	ENST00000307068.5	0.00077393	0.023313	1.44306	0.429232	3.75319	0.630009	0.0449517	0.157518	0.231409	0.231409
MTMR11	ENST00000439741.4	0.00077647	0.0233575	1.96968	0.586032	4.92281	1.52394	0.239067	0.276083	0.0775026	0.276083
PRRT2	ENST00000572820.2	0.000776708	0.0233575	3.39398	1.00982	2.50577	3.6963	0.909103	0.0914656	0.620515	0.620515
CPNE2	ENST00000290776.13	0.000778263	0.0233897	1.21687	0.362118	5.25427	0.536822	0.0543095	0.142385	0.0599471	0.142385
ZSWIM4	ENST00000590508.5	0.000780973	0.0234604	0.988992	0.294391	4.80349	0.376294	0.0185059	0.111493	0.0854571	0.111493
TMEM121	ENST00000392519.7	0.000781511	0.0234625	3.70867	1.10401	2.98378	4.51781	1.38628	0.282523	0.441987	0.441987
GSPT1	ENST00000439887.6	0.000782119	0.0234625	0.66892	0.19914	6.42294	0.219336	0.0162007	0.0432844	0.0314849	0.0432844
ATAD3B	ENST00000308647.7	0.000781961	0.0234625	1.00674	0.299704	5.31707	0.291199	0.0171427	0.117591	0.057266	0.117591
ACTN4	ENST00000390009.7	0.000786188	0.0235199	0.867805	0.258459	7.07742	0.2512	0.00212257	0.0980789	0.0263332	0.0980789
ACTN4	ENST00000634692.1	0.000786188	0.0235199	0.867805	0.258459	7.07742	0.2512	0.00212257	0.0980789	0.0263332	0.0980789
EXOC7	ENST00000332065.9	0.000788031	0.0235538	0.625399	0.186299	7.53439	0.180479	0.00771636	0.0443446	0.0249564	0.0443446
PPP4R3A	ENST00000557018.5	0.000794061	0.0236796	3.96801	1.18277	1.55314	4.68078	0.646536	1.45186	1.11397	1.45186
KMT5C	ENST00000474492.1	0.00079378	0.0236796	2.83703	0.845624	1.89726	2.38964	0.1604	0.752741	0.912219	0.912219
FLNA	ENST00000498491.5	0.000797363	0.0237349	1.72064	0.513055	6.21179	0.85443	0.064723	0.330115	0.0342159	0.330115
STK10	ENST00000176763.10	0.000798548	0.0237489	0.642907	0.191724	6.8075	0.148436	0.00141964	0.0537174	0.0279535	0.0537174
SARM1	ENST00000585482.6	0.000802075	0.023831	0.65903	0.196604	5.5532	0.186988	0.00927612	0.0400715	0.0487033	0.0487033
ROBO3	ENST00000527245.5	0.000804965	0.0238635	3.12559	0.93271	1.90787	2.7669	0.39848	0.416986	0.906442	0.906442
MFSD10	ENST00000355443.9	0.000807036	0.0239032	0.699201	0.208694	6.06801	0.148677	0.021301	0.0440285	0.0365005	0.0440285
SPARC	ENST00000538026.5	0.000807589	0.0239088	4.89713	1.46175	6.10357	8.70623	0.811242	2.39383	0.0358994	2.39383
C7orf50	ENST00000357429.10	0.00081148	0.0239833	0.610717	0.182366	6.11988	0.0893613	0.0142544	0.00892923	0.0356318	0.0356318
COTL1	ENST00000262428.5	0.00081233	0.0239949	1.51916	0.453676	7.6048	0.70194	0.00803922	0.300694	0.0248864	0.300694
PABPC1	ENST00000318607.10	0.00082162	0.0241637	0.611161	0.182687	9.9376	0.112401	0.000232256	0.0354496	0.0498294	0.0498294
HEXB	ENST00000515528.1	0.000823271	0.0241979	3.12526	0.934349	2.16034	3.09516	0.53326	0.231281	0.776252	0.776252
EFEMP2	ENST00000533347.5	0.000828254	0.0243226	0.988624	0.295714	4.66511	0.338474	0.0351989	0.0543529	0.0959712	0.0959712
ZBTB7C	ENST00000590800.6	0.000836787	0.0245291	4.20035	1.25747	2.07776	4.41697	1.55451	-1.42559	0.817319	0.817319
VIM	ENST00000478746.1	0.000842839	0.0246734	2.51963	0.754758	2.75347	2.4113	0.122063	0.732426	0.523227	0.732426
KIFC3	ENST00000565270.1	0.000853803	0.0249275	3.38008	1.0136	2.30224	3.3406	0.831925	0.336091	0.709143	0.709143
RPS2	ENST00000527826.1	0.000855789	0.0249632	3.46222	1.03843	1.14933	3.39505	0.227946	1.26484	1.38956	1.38956
MPDU1	ENST00000571822.5	0.000860591	0.0250859	3.22506	0.96775	2.76225	4.34171	0.884841	0.491012	0.519971	0.519971
AMH	ENST00000221496.4	0.000860764	0.0250859	2.5519	0.765765	2.54637	1.60693	0.275779	-0.0955976	0.603815	0.603815
NDRG1	ENST00000323851.11	0.00086958	0.0252529	1.28893	0.387107	6.80879	0.600478	0.00289073	0.221887	0.0279441	0.221887
DGKZ	ENST00000527911.5	0.000870342	0.0252567	4.26172	1.28003	3.44668	5.7078	0.524803	1.9329	0.305421	1.9329
LRRFIP1	ENST00000289175.10	0.000872336	0.0252881	0.916993	0.275476	6.26489	0.28235	0.0450298	0.0688007	0.0334645	0.0688007
ACADVL	ENST00000577191.5	0.000877266	0.0254085	0.602511	0.181087	5.83823	0.107358	0.00705751	0.0421312	0.041051	0.0421312
FASN	ENST00000578424.2	0.000878948	0.0254122	3.91465	1.17675	2.69898	4.47542	1.36753	0.709589	0.543717	0.709589
TAFA5	ENST00000358295.9	0.000880219	0.0254377	2.21298	0.665308	3.06492	1.59174	0.248492	0.199634	0.415459	0.415459
ARF4	ENST00000493378.1	0.000880794	0.0254431	0.715672	0.21517	5.94703	0.232605	0.00936305	0.0600844	0.0387436	0.0600844
LY6E	ENST00000619718.2	0.000882116	0.0254589	0.88206	0.265229	6.48371	0.278228	0.0633626	0.042157	0.0308158	0.042157
NRARP	ENST00000356628.4	0.000883766	0.0254952	1.22425	0.368182	5.43375	0.480105	0.00573944	0.197598	0.0527505	0.197598
VKORC1	ENST00000394975.3	0.000885276	0.0255112	0.65414	0.196754	6.6152	0.16269	0.00224236	0.055826	0.0295205	0.055826
RDH11	ENST00000553384.5	0.000888602	0.0255671	0.753266	0.226641	6.1741	0.153844	0.0422708	0.0144562	0.0347783	0.0347783
CREB3L4	ENST00000271889.8	0.000894221	0.0256837	3.53504	1.06418	2.87324	4.43574	1.21882	0.283596	0.479889	0.479889
DTX3	ENST00000337737.8	0.000897288	0.0257426	0.591221	0.17803	6.04675	0.0891526	0.0106701	0.0172278	0.0368721	0.0368721
EXD2	ENST00000409949.5	0.00089769	0.0257426	3.13391	0.94373	3.58028	3.41793	1.06375	0.262808	0.272192	0.272192
COL27A1	ENST00000485397.1	0.000897848	0.0257426	3.32852	1.00235	1.17932	2.44348	0.139464	0.218704	1.36759	1.36759
PLXND1	ENST00000324093.8	0.000901309	0.0257573	1.11933	0.337185	7.57837	0.501223	0.00127513	0.169265	0.0249084	0.169265
SPHK2	ENST00000245222.8	0.000905601	0.025863	4.58313	1.38116	2.2442	4.92489	2.12536	-1.79802	0.736039	0.736039
SNX18	ENST00000326277.5	0.000907883	0.0259055	3.23204	0.974204	3.54187	3.6167	0.467145	0.956465	0.28161	0.956465
MGMT	ENST00000306010.8	0.000909063	0.025911	0.66293	0.199843	5.37821	0.146107	0.00507875	0.0340098	0.0548271	0.0548271
REC8	ENST00000620473.4	0.000911851	0.0259396	0.84494	0.254776	5.09531	0.230016	0.0297623	0.0619944	0.0676042	0.0676042
REC8	ENST00000646765.1	0.000911851	0.0259396	0.84494	0.254776	5.09531	0.230016	0.0297623	0.0619944	0.0676042	0.0676042
CELSR2	ENST00000498157.1	0.000911123	0.0259396	0.934122	0.281649	4.70928	0.22536	0.0265337	0.0146581	0.0924552	0.0924552
BRD7	ENST00000569774.6	0.000916173	0.0260286	3.87353	1.16846	1.68193	3.61418	1.01287	-0.521381	1.03507	1.03507
TPRA1	ENST00000355552.7	0.000915452	0.0260286	1.01841	0.307185	5.92884	0.319112	0.102434	-0.060521	0.0391092	0.0391092
NPHP4	ENST00000378156.9	0.000915856	0.0260286	0.84571	0.255103	5.2175	0.16837	0.0360119	-0.0107311	0.0616041	0.0616041
MXD3	ENST00000513063.5	0.000917076	0.0260429	2.73466	0.824985	2.78743	2.49596	0.496734	0.524165	0.510705	0.524165
PDGFRA	ENST00000509092.5	0.000918689	0.0260661	4.0369	1.21802	1.60196	4.89684	0.55022	1.67514	1.08356	1.67514
UBALD2	ENST00000327490.8	0.000924788	0.0262076	0.655801	0.19798	6.11391	0.12476	0.00308839	0.0557056	0.0357291	0.0557056
CDH24	ENST00000485922.2	0.000927752	0.0262664	2.84614	0.859454	2.88637	2.46799	0.63271	0.290367	0.475282	0.475282
ENTPD2	ENST00000355097.7	0.00092939	0.0263014	2.40289	0.725713	4.15325	2.01964	0.174551	0.615437	0.154031	0.615437
TMEM45A	ENST00000403410.5	0.000930194	0.0263014	0.88486	0.267262	5.05692	0.293507	0.0246798	0.0824639	0.0696555	0.0824639
AMPD3	ENST00000396554.7	0.000934711	0.0263608	4.31012	1.30236	1.91647	4.11567	1.64242	-1.41901	0.901777	0.901777
DCN	ENST00000552962.5	0.000933533	0.0263608	4.48755	1.35583	5.30789	8.54209	0.0193136	2.73808	0.0576463	2.73808
AKT1S1	ENST00000391834.6	0.000934247	0.0263608	3.9499	1.19346	1.46729	4.35809	0.967587	0.839556	1.16894	1.16894
VASP	ENST00000245932.11	0.000935669	0.0263764	0.654606	0.197815	8.10602	0.133794	0.000757002	0.057939	0.0254633	0.057939
METTL26	ENST00000448973.6	0.000936358	0.0263845	1.11185	0.336011	4.25629	0.242124	0.030552	-0.0170147	0.138803	0.138803
PXDC1	ENST00000380283.4	0.000937958	0.0264068	0.742742	0.224495	6.52366	0.289134	0.00749601	0.0681009	0.030401	0.0681009
FOXS1	ENST00000375978.4	0.000945644	0.0265755	3.84529	1.16305	3.18642	5.96713	0.118828	1.91019	0.377801	1.91019
C1QTNF3	ENST00000231338.7	0.000945315	0.0265755	3.74645	1.13312	2.09734	5.01878	1.11849	-0.459843	0.807452	0.807452
XRCC6	ENST00000405506.2	0.000951278	0.0267004	3.46035	1.04714	6.16572	3.43353	1.60986	-0.946975	0.0349067	0.0349067
LONP1	ENST00000360614.7	0.00095298	0.0267149	0.707814	0.214226	6.06379	0.148823	0.029057	0.0397821	0.0365735	0.0397821
SPON2	ENST00000512888.1	0.000954351	0.0267419	2.9327	0.887715	1.6872	3.09199	0.150129	0.924386	1.03193	1.03193
RAB2A	ENST00000531289.5	0.000958414	0.0268285	0.79706	0.241353	6.17905	0.227111	0.0138824	0.0734949	0.034703	0.0734949
CNN3	ENST00000394202.8	0.000958672	0.0268285	0.890494	0.269652	5.49532	0.28066	0.0200296	0.0890388	0.0505954	0.0890388
NT5DC2	ENST00000422318.7	0.000960662	0.0268546	0.666752	0.201936	8.11535	0.160801	0.000403654	0.0607635	0.0254923	0.0607635
S100P	ENST00000296370.4	0.000960837	0.0268546	1.79255	0.542908	3.28646	0.925263	0.0934711	0.321177	0.348653	0.348653
CFL1	ENST00000526975.1	0.000961707	0.026856	0.603669	0.182847	5.78908	0.118661	0.00795552	0.032096	0.042194	0.042194
GAS2L1	ENST00000621062.4	0.000972548	0.0270779	1.34991	0.409267	5.43269	0.534214	0.198461	-0.0969066	0.0527889	0.0527889
FTO	ENST00000431610.6	0.000973842	0.027096	3.87391	1.17463	2.39166	3.95189	1.40048	-0.47837	0.669157	0.669157
CLSTN1	ENST00000361311.4	0.000975595	0.0271166	0.692234	0.209929	8.16731	0.189105	0.00840148	0.0577036	0.0256665	0.0577036
MYPOP	ENST00000322217.6	0.000977036	0.0271451	0.624085	0.189286	5.53302	0.134127	0.00439486	0.0110318	0.0493487	0.0493487
MEIS3	ENST00000558555.5	0.00097755	0.0271479	1.09206	0.331238	5.87345	0.564802	0.0461691	0.118409	0.0402716	0.118409
EIF2AK3	ENST00000303236.8	0.000979875	0.0271744	0.889807	0.269946	6.01436	0.320179	0.0566946	0.0526116	0.0374563	0.0526116
TPGS2	ENST00000590842.5	0.000985012	0.0272923	0.806682	0.244837	5.06099	0.183455	0.0204836	0.0177715	0.0694341	0.0694341
NA	ENST00000642444.1	0.000986212	0.0273073	0.646418	0.196215	8.9744	0.12902	0.000145342	0.0576054	0.0315045	0.0576054
TNC	ENST00000423613.6	0.000987079	0.0273197	3.04545	0.924492	5.84303	2.83905	1.24109	-0.326582	0.0409428	0.0409428
CFAP410	ENST00000462742.1	0.000990941	0.0273688	0.656022	0.199212	5.4338	0.116961	0.00677949	0.00749472	0.0527485	0.0527485
EPS8L1	ENST00000201647.11	0.000991399	0.0273699	1.84259	0.559556	5.52003	1.18941	0.313351	0.156304	0.0497722	0.156304
ID3	ENST00000634790.2	0.000998596	0.0275221	1.40031	0.425507	7.01624	0.626392	0.000882896	0.270701	0.0266447	0.270701
ID3	ENST00000374561.6	0.000998596	0.0275221	1.40031	0.425507	7.01624	0.626392	0.000882896	0.270701	0.0266447	0.270701
SNAPC2	ENST00000597584.5	0.0010029	0.0276174	4.60674	1.40035	2.33489	5.40479	2.24711	-1.92169	0.694342	0.694342
MYDGF	ENST00000262947.7	0.00100384	0.0276319	0.683284	0.20772	7.16822	0.169094	0.000788987	0.0639323	0.0259283	0.0639323
DNPEP	ENST00000523282.5	0.00100625	0.0276573	5.09173	1.54822	3.03491	6.06179	3.17031	-1.59041	0.425142	0.425142
SERPING1	ENST00000378324.6	0.00100838	0.0276751	1.71078	0.520283	6.94852	0.98842	0.201355	0.204686	0.0270269	0.204686
DPY19L1	ENST00000638088.1	0.00100836	0.0276751	0.932808	0.283685	6.26815	0.276135	0.0517269	0.0689887	0.03342	0.0689887
MFF	ENST00000531278.5	0.00100897	0.0276799	3.27043	0.994652	2.36534	3.31077	0.803249	0.0644634	0.68075	0.68075
LIME1	ENST00000621325.1	0.00101383	0.0277783	1.75536	0.534088	3.42149	0.717312	0.115935	0.0189174	0.31194	0.31194
HPCAL4	ENST00000372844.8	0.00101528	0.0278064	4.35928	1.32652	2.56893	8.17899	0.869833	1.76965	0.59467	1.76965
IQCK	ENST00000564955.5	0.00101645	0.0278152	3.91612	1.19178	1.50894	3.07341	0.988496	-0.903267	1.14203	1.14203
KIF21B	ENST00000332129.6	0.00102179	0.0279379	1.12931	0.343833	5.37745	0.534733	0.00869686	0.168635	0.0548561	0.168635
BAX	ENST00000506183.5	0.00102289	0.0279564	4.26919	1.29994	1.81535	4.00599	1.57706	-1.21163	0.957686	0.957686
CSNK2A1	ENST00000642689.1	0.00102614	0.0280294	5.27359	1.60621	4.54082	9.09863	0.636262	3.23358	0.106735	3.23358
ADCY3	ENST00000498288.1	0.00103111	0.0281221	3.74878	1.14226	2.17849	3.7844	1.18971	-0.579626	0.767423	0.767423
C1QTNF1	ENST00000579760.6	0.0010317	0.0281266	2.0338	0.619732	4.92575	1.20895	0.498782	-0.297509	0.077319	0.077319
SEMA6B	ENST00000586582.6	0.00103342	0.0281619	1.35172	0.41195	6.54992	0.57521	0.00493374	0.24962	0.0301388	0.24962
CTTN	ENST00000525852.3	0.00103547	0.0281695	0.881569	0.268713	4.66587	0.231715	0.0100336	0.0982766	0.0959092	0.0982766
KLF5	ENST00000377687.6	0.00103508	0.0281695	0.977474	0.297937	6.42053	0.313056	0.0129726	0.120177	0.0315124	0.120177
ARHGEF10	ENST00000521927.1	0.00103586	0.0281695	3.66989	1.11866	1.26812	3.63659	0.573156	0.860727	1.30396	1.30396
ARHGEF10	ENST00000631992.1	0.00103586	0.0281695	3.66989	1.11866	1.26812	3.63659	0.573156	0.860727	1.30396	1.30396
ARRDC1	ENST00000371421.9	0.00103824	0.0282109	0.831444	0.253493	5.74203	0.223554	0.0081183	0.0882694	0.0433518	0.0882694
SYT11	ENST00000368324.5	0.00104067	0.0282418	0.778921	0.237527	6.52154	0.247259	0.0016951	0.0829335	0.0304226	0.0829335
SRSF2	ENST00000585202.5	0.0010413	0.0282471	0.839719	0.25608	5.64463	0.17361	0.0524028	-0.0112153	0.0459629	0.0459629
SLX1A	ENST00000565081.1	0.00104647	0.0283522	1.23306	0.376193	4.24068	0.476066	0.0712997	0.0893191	0.140982	0.140982
SP5	ENST00000375281.3	0.0010514	0.0284386	2.87759	0.878278	1.70365	2.482	0.134884	1.01888	1.02218	1.02218
CALD1	ENST00000417172.5	0.00105106	0.0284386	6.16887	1.88277	4.37331	11.8367	1.14597	4.17126	0.123912	4.17126
ALDH16A1	ENST00000293350.9	0.00105607	0.0285413	0.646455	0.197382	5.85892	0.149286	0.0139702	0.0444692	0.0405892	0.0444692
PTK7	ENST00000230419.9	0.00106029	0.0286082	1.17246	0.35811	8.94979	0.502703	0.000591928	0.191772	0.0312261	0.191772
PKN3	ENST00000291906.5	0.00106193	0.0286407	0.8004	0.244503	5.26447	0.190099	0.00764929	0.0820231	0.0594992	0.0820231
CCDC150	ENST00000448409.5	0.00106507	0.0286904	3.58781	1.09627	1.69297	3.77569	0.500183	1.30253	1.0285	1.30253
TSC1	ENST00000642627.1	0.00106553	0.0286904	5.24711	1.60333	2.57128	8.13589	3.26229	0.530433	0.593724	0.593724
UBE4B	ENST00000253251.12	0.00106539	0.0286904	0.903177	0.275976	6.24657	0.405072	0.0414831	0.0727612	0.0337186	0.0727612
FKBP1A	ENST00000614856.1	0.00107201	0.0288056	0.663014	0.2027	5.38909	0.13438	0.00722108	0.0373624	0.0544099	0.0544099
PSMA3	ENST00000555743.1	0.00107695	0.0289147	4.22408	1.29192	1.99583	4.61705	1.64408	-0.947307	0.859506	0.859506
SRSF2	ENST00000452355.7	0.0010857	0.0290898	3.3274	1.01839	3.73423	3.55199	1.23563	0.320035	0.235715	0.320035
SLC35A2	ENST00000247138.11	0.00108918	0.0291578	0.977983	0.299405	5.13743	0.230991	0.0690182	-0.00960987	0.0654472	0.0654472
EME1	ENST00000507616.1	0.0010927	0.0292296	3.17986	0.973773	1.6028	2.44557	0.339313	0.346688	1.08304	1.08304
ADGRA2	ENST00000315215.11	0.00109428	0.0292598	2.15433	0.659806	5.86538	1.97742	0.234128	0.418889	0.0404474	0.418889
CRTAP	ENST00000449224.1	0.00109736	0.0293302	0.818369	0.250703	7.12551	0.289365	0.00181183	0.0924662	0.0261104	0.0924662
NOTCH3	ENST00000597756.1	0.00111079	0.0295926	3.88325	1.19087	1.44589	4.23668	0.944322	0.817755	1.18294	1.18294
COL5A1	ENST00000371817.7	0.00111228	0.0296082	1.6376	0.50226	9.93293	1.15965	0.000636634	0.377761	0.0496958	0.377761
CLDN15	ENST00000401528.5	0.00111578	0.0296717	0.932466	0.28607	4.54557	0.255078	0.0164543	0.0604798	0.106299	0.106299
TMEM132A	ENST00000005286.8	0.00112878	0.0299256	0.821253	0.252205	7.85215	0.250932	0.00216683	0.0932442	0.0249339	0.0932442
VAV2	ENST00000371851.1	0.00112925	0.0299262	0.632301	0.194185	6.47982	0.126992	0.0113132	0.0452488	0.0308572	0.0452488
ARHGEF11	ENST00000487682.5	0.00113448	0.0300403	1.03703	0.318609	4.40797	0.279053	0.0322855	0.0707981	0.119982	0.119982
AXIN2	ENST00000580513.1	0.00113422	0.0300403	2.50595	0.769894	2.57397	2.12584	0.183363	0.705741	0.59264	0.705741
CASTOR1	ENST00000407689.7	0.00114772	0.0303662	0.920819	0.283193	4.84891	0.325843	0.0379823	0.00972466	0.0823148	0.0823148
CTSB	ENST00000530640.6	0.00115276	0.0304504	2.07968	0.639838	5.43811	1.90169	0.561497	-0.234184	0.0525928	0.0525928
ANG	ENST00000336811.10	0.00115331	0.0304526	1.76697	0.543653	3.90988	1.11563	0.238273	0.205064	0.197835	0.205064
C1QTNF6	ENST00000397110.6	0.00115634	0.0305081	3.11826	0.959631	3.39273	3.42797	0.574764	0.806574	0.319507	0.806574
TLE1	ENST00000376499.8	0.00116121	0.0306241	1.28938	0.396947	6.94838	0.525387	0.00148665	0.234864	0.0270277	0.234864
CDK2	ENST00000555408.5	0.00116396	0.0306473	0.850465	0.261877	4.89846	0.176142	0.0238215	0.0162351	0.0790482	0.0790482
TRRAP	ENST00000456197.1	0.00116756	0.0307052	0.718474	0.221294	6.86537	0.180165	0.0459054	-0.018563	0.0275513	0.0275513
WBP1	ENST00000428943.1	0.00117833	0.0308766	2.89351	0.891938	2.27366	2.92882	0.471037	0.717211	0.722293	0.722293
ABI2	ENST00000417864.5	0.00118687	0.031063	4.83464	1.49124	2.20128	7.39653	1.58717	1.74854	0.756428	1.74854
ARID1B	ENST00000637741.1	0.00118661	0.031063	4.5567	1.40549	3.90334	6.88673	2.13765	0.825444	0.199158	0.825444
BRD2	ENST00000425016.5	0.00119048	0.0310773	3.87292	1.19492	1.52742	4.43074	1.01152	0.917935	1.13024	1.13024
BRD2	ENST00000452539.5	0.00119048	0.0310773	3.87292	1.19492	1.52742	4.43074	1.01152	0.917935	1.13024	1.13024
BRD2	ENST00000447730.5	0.00119048	0.0310773	3.87292	1.19492	1.52742	4.43074	1.01152	0.917935	1.13024	1.13024
BRD2	ENST00000518754.1	0.00119048	0.0310773	3.87292	1.19492	1.52742	4.43074	1.01152	0.917935	1.13024	1.13024
EGR3	ENST00000519492.1	0.00119321	0.0311296	3.744	1.15538	1.82613	3.65292	1.05074	-0.939738	0.951614	0.951614
CNIH2	ENST00000528852.5	0.00119409	0.0311321	3.32675	1.02668	1.51648	3.11071	0.443915	0.0417008	1.1372	1.1372
PHKA2	ENST00000469485.5	0.001209	0.0314286	1.21303	0.374769	4.10631	0.405414	0.049049	0.0972943	0.161629	0.161629
PDLIM4	ENST00000253754.8	0.00122054	0.0316784	1.35529	0.419072	4.97841	0.831314	0.0324408	0.230992	0.0741162	0.230992
CDK2AP2	ENST00000301488.7	0.00122616	0.0317614	0.636162	0.196788	6.12125	0.129095	0.00733893	0.0507495	0.0356096	0.0507495
NA	ENST00000304921.10	0.00122895	0.0318209	3.81657	1.18084	1.39276	4.17825	0.873352	0.961451	1.21823	1.21823
GPR137	ENST00000438980.6	0.00123317	0.0318923	0.603666	0.18683	5.74656	0.119332	0.0091209	0.016658	0.0432374	0.0432374
TMEFF1	ENST00000374879.5	0.00123654	0.031967	0.799581	0.247524	5.14518	0.180713	0.0268419	0.0318479	0.0650605	0.0650605
BARX2	ENST00000281437.5	0.00124143	0.032068	2.33877	0.724259	3.19126	1.83492	0.119956	0.666871	0.376355	0.666871
FLNA	ENST00000490936.5	0.00124306	0.0320974	0.970932	0.300709	7.53065	0.337679	0.00289707	0.132742	0.0249611	0.132742
SRP9	ENST00000626563.2	0.00125888	0.0324035	4.09075	1.26837	3.57968	6.10051	0.184257	2.2289	0.272338	2.2289
AGAP2	ENST00000328568.9	0.00126506	0.0325243	3.4018	1.05522	2.02698	5.75982	0.576975	1.09325	0.843295	1.09325
FOXM1	ENST00000627656.2	0.00126653	0.0325494	1.44841	0.449336	5.22972	0.64344	0.0587769	0.244077	0.0610465	0.244077
WDR18	ENST00000586317.2	0.00126851	0.0325668	3.36982	1.04555	1.34851	2.52963	0.39158	-0.239484	1.24819	1.24819
THNSL1	ENST00000524413.5	0.00127125	0.0326195	3.98035	1.23522	3.16133	5.0545	1.5773	0.711339	0.385376	0.711339
AGO1	ENST00000635259.1	0.00127225	0.0326322	3.79708	1.17842	3.26357	5.32277	1.38379	0.699236	0.355175	0.699236
ZNF48	ENST00000622647.3	0.00127501	0.0326809	0.716609	0.222443	5.98965	0.152096	0.0310039	0.0432172	0.0379169	0.0432172
NLRX1	ENST00000525863.1	0.00128422	0.0328267	3.99796	1.2418	1.41335	4.16026	1.10864	0.407764	1.20446	1.20446
TMBIM1	ENST00000258412.8	0.00128434	0.0328267	0.817413	0.253898	7.40802	0.236243	0.00130033	0.095396	0.0251753	0.095396
HDAC7	ENST00000417902.5	0.0012885	0.0329073	2.98755	0.928236	2.21784	2.96259	0.543919	0.429548	0.748513	0.748513
PTPRU	ENST00000373779.8	0.00128956	0.0329118	0.76026	0.236231	6.98349	0.324135	0.0100694	0.073638	0.0268246	0.073638
EPHB1	ENST00000398015.8	0.00129336	0.0329798	1.38612	0.430812	4.02633	0.491655	0.102873	0.0646839	0.175525	0.175525
TMEM200B	ENST00000521452.2	0.00129299	0.0329798	1.07825	0.335116	5.57502	0.554485	0.120432	0.042105	0.0480223	0.0480223
ARHGEF1	ENST00000354532.7	0.00129495	0.0330077	4.20231	1.30624	5.19571	6.27243	0.966096	1.59331	0.0626176	1.59331
HHEX	ENST00000492654.3	0.00130776	0.0332953	3.31314	1.03076	1.66226	3.06114	0.546851	0.755308	1.04684	1.04684
SLC35F2	ENST00000525071.5	0.00132087	0.0336028	1.60894	0.501009	4.75865	1.05338	0.28781	-0.0610062	0.088705	0.088705
SPATA20	ENST00000503127.5	0.0013216	0.0336083	0.634123	0.197469	6.45915	0.105859	0.0274107	-0.0159481	0.0310805	0.0310805
SULF2	ENST00000359930.8	0.00132821	0.0337633	1.68545	0.525093	5.06115	0.837595	0.344158	-0.253962	0.0694253	0.0694253
ITGA5	ENST00000293379.9	0.00133426	0.0339039	0.952687	0.296925	8.24534	0.302971	0.000336678	0.13191	0.0259692	0.13191
ACADVL	ENST00000578824.5	0.0013368	0.0339421	0.669659	0.208749	5.44057	0.144741	0.0128601	0.0345098	0.0525042	0.0525042
P2RY6	ENST00000393592.6	0.00133772	0.0339525	4.2587	1.32762	1.69134	5.52996	0.562705	2.08117	1.02947	2.08117
DYNC1H1	ENST00000555062.2	0.00135862	0.0343098	3.97563	1.24111	1.4318	4.25152	1.11829	0.542568	1.19223	1.19223
SNX3	ENST00000368979.6	0.00135822	0.0343098	1.3551	0.423021	4.99635	0.606565	0.115239	0.153181	0.0730644	0.153181
WSB2	ENST00000441406.6	0.00137164	0.0344923	0.79535	0.248504	6.01409	0.219734	0.0212946	0.0713367	0.0374612	0.0713367
AC005726.1	ENST00000481916.6	0.00137146	0.0344923	1.17887	0.368327	4.38198	0.556606	0.0505436	0.152954	0.122908	0.152954
TMEM39A	ENST00000461654.1	0.00137093	0.0344923	3.14246	0.981804	2.49312	3.36662	0.820127	0.39882	0.62578	0.62578
SRPK2	ENST00000474770.1	0.00137413	0.0345283	4.35628	1.36132	1.4877	4.498	1.62411	-0.371083	1.15569	1.15569
THBS2	ENST00000617924.4	0.00137486	0.0345336	4.24339	1.32611	3.32505	6.02279	1.2744	1.36346	0.337853	1.36346
CASP2	ENST00000619992.4	0.00137584	0.0345448	3.79063	1.18469	1.38814	3.97633	0.883912	0.721889	1.22133	1.22133
WIPF1	ENST00000359761.7	0.00137761	0.0345629	3.38694	1.05865	4.0779	4.59918	0.653239	1.02787	0.166429	1.02787
TM7SF2	ENST00000279263.11	0.00138277	0.0346658	0.733482	0.229341	6.33745	0.183266	0.00649191	0.0724037	0.0325104	0.0724037
NKAPD1	ENST00000525785.5	0.00138371	0.034676	3.91446	1.22402	1.34612	3.86996	0.997531	0.311478	1.24982	1.24982
DET1	ENST00000444300.1	0.00139663	0.0349596	4.63938	1.45192	1.81524	5.71817	2.20435	-0.061304	0.957745	0.957745
PLXNB3	ENST00000538966.5	0.00139854	0.0349939	4.45558	1.39457	2.02957	4.39844	2.07527	-1.90858	0.841958	0.841958
AP1S1	ENST00000337619.11	0.0014006	0.035016	0.662616	0.207422	6.9997	0.138469	0.00133876	0.0631972	0.0267344	0.0631972
DAAM2	ENST00000633794.1	0.00140529	0.0350824	3.17879	0.995373	1.82325	4.14098	0.532918	-0.115774	0.953234	0.953234
DCN	ENST00000393155.5	0.00141029	0.0351937	3.67521	1.15119	3.26253	7.19762	0.612484	1.37536	0.355475	1.37536
SLC1A6	ENST00000221742.7	0.00142026	0.0354155	4.48592	1.40602	2.63662	6.92365	0.17798	2.78737	0.567779	2.78737
TMEM199	ENST00000581386.5	0.00142998	0.0356308	3.1123	0.976091	2.21209	3.10292	0.677879	-0.000746417	0.751252	0.751252
TMEM263	ENST00000550344.5	0.00144339	0.0358558	2.08095	0.653188	4.95666	1.28188	0.564565	-0.398816	0.0754178	0.0754178
SDF2L1	ENST00000248958.5	0.00144269	0.0358558	0.63453	0.199164	5.39852	0.118271	0.00544656	0.01286	0.0540528	0.0540528
CRELD2	ENST00000404488.7	0.00144246	0.0358558	0.830159	0.260563	5.05327	0.214349	0.0319846	0.043118	0.069855	0.069855
SLBP	ENST00000488267.5	0.00144156	0.0358558	3.89002	1.2209	1.93408	4.2632	1.34361	-0.838662	0.892278	0.892278
TRPS1	ENST00000395715.7	0.00144323	0.0358558	0.711371	0.22329	6.04094	0.176861	0.00687049	0.0679171	0.0369751	0.0679171
ANKS6	ENST00000353234.5	0.00144199	0.0358558	0.683077	0.214392	6.18676	0.182616	0.00414094	0.0648051	0.0345867	0.0648051
SP3	ENST00000490182.1	0.00145453	0.036064	3.19385	1.00322	2.61231	3.65612	0.179849	1.32982	0.577343	1.32982
CDC42EP1	ENST00000249014.5	0.00145884	0.0361573	1.31846	0.414253	7.72801	0.583301	0.000571001	0.256837	0.024853	0.256837
RNFT2	ENST00000392549.6	0.00146214	0.0361842	3.61789	1.13695	3.10519	4.69965	1.53629	0.397717	0.402703	0.402703
ZDHHC9	ENST00000357166.11	0.00146421	0.0362218	0.633111	0.198986	6.88115	0.132545	0.00219348	0.0571998	0.027447	0.0571998
ABHD17C	ENST00000258884.5	0.00146824	0.0362531	0.648114	0.203753	5.51925	0.1269	0.012475	0.0305079	0.0497978	0.0497978
C3orf86	ENST00000636468.1	0.00146747	0.0362531	3.19724	1.00509	1.37471	2.49672	0.284925	-0.172105	1.23039	1.23039
FHL3	ENST00000475084.5	0.00146693	0.0362531	2.81948	0.886308	1.92494	2.43904	0.281113	0.806301	0.897201	0.897201
IHH	ENST00000295731.7	0.00146983	0.0362736	3.30298	1.03848	2.86472	3.34514	0.11024	1.50743	0.482896	1.50743
MXD4	ENST00000513372.5	0.00147018	0.0362736	0.798053	0.25092	4.86987	0.187017	0.0135285	0.0718656	0.0809129	0.0809129
LRP10	ENST00000546834.5	0.00147807	0.0364544	0.721667	0.227014	6.10025	0.223692	0.0160483	0.0612546	0.0359544	0.0612546
MSX1	ENST00000382723.5	0.00149062	0.0366534	0.978547	0.308058	4.67617	0.302569	0.00590044	0.136449	0.095076	0.136449
NA	ENST00000652146.1	0.00149062	0.0366534	0.978547	0.308058	4.67617	0.302569	0.00590044	0.136449	0.095076	0.136449
GPRC5B	ENST00000569479.5	0.0014942	0.0367277	2.72645	0.858507	5.6741	2.86736	1.06041	-0.160524	0.0451408	0.0451408
ANKRD9	ENST00000559404.5	0.00149715	0.0367863	0.791817	0.249373	4.88692	0.193805	0.0126273	0.0806526	0.0797944	0.0806526
C1orf159	ENST00000487177.5	0.00150128	0.0368464	1.20995	0.381153	4.07344	0.34638	0.050721	0.0139688	0.167196	0.167196
GLYCTK	ENST00000473583.1	0.00150283	0.0368628	2.99566	0.943771	1.53806	2.2605	0.212568	0.512015	1.12349	1.12349
CDC42EP4	ENST00000335793.4	0.00150748	0.0369571	1.0014	0.315575	6.98635	0.317342	0.00140514	0.147976	0.0268085	0.147976
GPR146	ENST00000444847.2	0.00150922	0.0369858	3.69068	1.16319	1.84215	3.75459	1.08686	-0.911515	0.942641	0.942641
HSPA2	ENST00000247207.6	0.00153875	0.0375719	0.886696	0.279955	8.17239	0.380254	0.000393131	0.117169	0.0256847	0.117169
NGEF	ENST00000264051.8	0.00153936	0.0375719	2.7126	0.856477	2.69337	2.32972	0.235179	0.86515	0.545857	0.86515
CDKN2A	ENST00000530628.2	0.00154002	0.0375719	3.43895	1.08586	2.98821	4.31652	1.00868	0.759954	0.440507	0.759954
SNX5	ENST00000377768.7	0.00154222	0.0376115	0.755526	0.238591	5.80012	0.173492	0.0434568	0.00691955	0.0419315	0.0419315
CNEP1R1	ENST00000458059.7	0.00154538	0.0376605	3.02171	0.954419	2.04091	2.63652	0.530256	0.10987	0.836116	0.836116
C19orf48	ENST00000596655.1	0.00154662	0.0376626	3.27232	1.03365	2.58482	3.59521	0.675561	0.927084	0.588284	0.927084
NBL1	ENST00000375136.7	0.00154618	0.0376626	2.09126	0.660564	5.3224	1.44142	0.42523	0.229289	0.0570465	0.229289
KCNMA1	ENST00000640969.1	0.0015762	0.0381888	4.21871	1.33492	3.99113	7.43217	1.14469	1.52833	0.182013	1.52833
CHD9	ENST00000219084.10	0.00157585	0.0381888	3.09478	0.979256	4.69102	3.17217	1.34452	-0.0735905	0.0938902	0.0938902
YES1	ENST00000577611.1	0.00157911	0.0382383	2.9321	0.927956	2.65677	3.03228	0.731719	-0.026079	0.559934	0.559934
ARSL	ENST00000540563.5	0.00158458	0.0383162	4.18221	1.32402	1.51064	4.60618	1.48859	0.242181	1.14094	1.14094
CERS4	ENST00000559450.5	0.00159445	0.0385263	0.867986	0.274947	5.73446	0.197558	0.0698498	-0.0307451	0.0435441	0.0435441
MSX2	ENST00000507785.2	0.00160005	0.0386188	1.85408	0.587498	4.60206	1.08648	0.278181	0.23955	0.101266	0.23955
MAPKAP1	ENST00000427078.5	0.0015997	0.0386188	3.409	1.08018	1.62067	3.24549	0.678105	0.684596	1.07207	1.07207
BX255925.3	ENST00000645271.1	0.00160097	0.0386269	0.623716	0.197646	5.40088	0.0861906	0.00463201	0.00214424	0.0539637	0.0539637
PAWR	ENST00000548426.1	0.0016046	0.0386716	1.592	0.504585	4.05861	0.648426	0.212135	-0.141427	0.169774	0.169774
PNMA3	ENST00000619635.1	0.00160581	0.0386865	1.40473	0.44526	3.90181	0.670414	0.0979155	0.0344057	0.199469	0.199469
TMEM178B	ENST00000610315.1	0.00160707	0.0386885	4.09738	1.29885	1.53682	4.61503	1.40624	0.451416	1.12427	1.12427
MYL6	ENST00000348108.8	0.00161552	0.0388634	0.861087	0.273093	7.83866	0.232694	0.0031084	0.108761	0.0249195	0.108761
CCDC88A	ENST00000426576.6	0.00161765	0.0388927	2.79285	0.885859	1.88997	2.44223	0.260912	0.241379	0.916206	0.916206
TMEM254	ENST00000372281.8	0.00162231	0.0389695	0.617601	0.195948	5.89606	0.13021	0.0178053	0.034425	0.039788	0.039788
DMRT3	ENST00000190165.3	0.00162208	0.0389695	4.29045	1.36122	1.75926	5.74835	0.0154369	2.76396	0.989706	2.76396
SLC35C2	ENST00000543605.5	0.00162382	0.0389912	4.07103	1.29174	3.33348	5.45041	2.16734	-0.10273	0.335526	0.335526
DNAAF5	ENST00000440747.5	0.00163033	0.0391046	0.643543	0.204272	5.76115	0.125583	0.0197168	0.0300069	0.0428736	0.0428736
PROSER3	ENST00000646935.1	0.00163197	0.0391152	3.47521	1.10319	3.02851	4.59475	0.376146	1.44941	0.427225	1.44941
NOX4	ENST00000263317.9	0.00164561	0.0393845	2.99156	0.950397	2.10425	3.21607	0.52194	0.832942	0.803989	0.832942
BORCS8-MEF2B	ENST00000602804.5	0.00165426	0.0395481	3.00442	0.954947	3.44091	2.93954	1.06098	0.0813366	0.306905	0.306905
KLHL29	ENST00000486442.6	0.00165982	0.0396232	0.967172	0.307509	5.65754	0.409381	0.0072137	0.134629	0.0455991	0.134629
QSOX1	ENST00000367600.5	0.00166241	0.0396455	0.677294	0.215374	7.54365	0.157888	0.000842988	0.0687362	0.0249451	0.0687362
GLT8D1	ENST00000266014.10	0.00166675	0.0397162	0.96573	0.307169	5.61697	0.318367	0.0947686	-0.0252678	0.046761	0.046761
TSPAN14	ENST00000616406.1	0.00166804	0.039722	0.762444	0.242528	6.97894	0.180837	0.00272376	0.0855058	0.0268503	0.0855058
NECAP2	ENST00000337132.10	0.00166879	0.039722	0.79143	0.251758	6.84814	0.246475	0.00363989	0.0914336	0.0276678	0.0914336
AKR1C3	ENST00000380554.5	0.00168119	0.0398071	1.17957	0.375488	4.36947	0.420238	0.0770603	0.134427	0.12436	0.134427
PEX5	ENST00000420616.6	0.00167834	0.0398071	3.29628	1.04912	2.5719	3.52676	0.814369	0.836625	0.593473	0.836625
DCN	ENST00000052754.10	0.00167874	0.0398071	2.57049	0.818142	2.02008	3.50547	0.157166	0.580693	0.846869	0.846869
CUL4A	ENST00000488558.2	0.00168089	0.0398071	0.668341	0.212746	5.23588	0.117941	0.00712369	0.0197479	0.0607678	0.0607678
TLCD3A	ENST00000570699.1	0.00167896	0.0398071	4.59883	1.46374	3.92017	7.01805	0.365221	2.84859	0.195767	2.84859
TUBGCP6	ENST00000491449.5	0.00168056	0.0398071	1.43724	0.457494	4.92423	0.50041	0.236537	-0.107305	0.0774138	0.0774138
ATAD3A	ENST00000339113.8	0.00168212	0.0398071	4.91498	1.56464	2.2275	6.46546	2.92824	-0.407087	0.743921	0.743921
TGIF1	ENST00000577543.5	0.0016995	0.0401459	0.658104	0.209703	5.34752	0.135706	0.00993227	0.046669	0.0560307	0.0560307
FAM111A	ENST00000528737.5	0.00170781	0.0402984	1.10085	0.350941	4.54681	0.415981	0.0435657	0.141174	0.106185	0.141174
EMILIN1	ENST00000433140.1	0.00170919	0.0403166	3.61961	1.15399	3.45548	4.93254	0.398661	1.59889	0.303166	1.59889
C11orf95	ENST00000338498.6	0.00172927	0.0407167	2.48065	0.791737	2.32942	1.94953	0.243466	0.573745	0.696806	0.696806
RAB11FIP5	ENST00000258098.6	0.00173161	0.0407426	0.700151	0.223492	6.20292	0.190608	0.0235763	0.0513468	0.0343461	0.0513468
ANGPTL2	ENST00000373425.8	0.00173606	0.0408327	1.59871	0.510441	5.49016	1.16287	0.014611	0.376213	0.0507704	0.376213
ACKR3	ENST00000447924.1	0.00173691	0.040838	2.62059	0.836747	3.14042	2.90695	0.563678	0.486541	0.391769	0.486541
CLUHP3	ENST00000562354.2	0.00174874	0.0410565	0.692371	0.221213	5.10733	0.117365	0.00642366	0.0297851	0.066979	0.066979
SMARCD1	ENST00000381513.8	0.00175609	0.0411853	0.670108	0.214184	6.50284	0.106186	0.0381974	-0.0114142	0.0306147	0.0306147
AKAP8L	ENST00000594893.5	0.00176228	0.0412832	0.977337	0.312486	4.55322	0.249035	0.0408703	0.0521272	0.105601	0.105601
ATF4	ENST00000337304.2	0.00176278	0.0412832	0.837201	0.267687	5.19703	0.212927	0.0182076	0.0892769	0.0625556	0.0892769
SCAMP4	ENST00000414057.6	0.00176599	0.0412991	3.51038	1.1226	2.40566	3.54742	1.22731	0.0616814	0.663047	0.663047
DUT	ENST00000558978.5	0.00177325	0.0414197	0.992601	0.317552	5.40252	0.382391	0.0620181	0.0892404	0.0539021	0.0892404
SHANK3	ENST00000414786.6	0.00177461	0.0414197	3.5212	1.12658	2.99538	4.49946	1.08958	0.814193	0.438124	0.814193
ERO1A	ENST00000629528.2	0.00178436	0.0415605	3.44223	1.10188	3.32235	4.31821	0.759709	1.0615	0.338601	1.0615
UBAP2L	ENST00000428595.1	0.00179249	0.0416954	0.748696	0.239765	5.26526	0.13569	0.0267663	0.00906978	0.0594649	0.0594649
LPCAT1	ENST00000283415.4	0.001794	0.0417158	1.35441	0.433776	6.46753	0.616355	0.0395763	0.242666	0.0309893	0.242666
FOXN3	ENST00000555353.5	0.00179708	0.0417724	4.14207	1.32679	1.75546	5.51808	1.51837	1.1222	0.991898	1.1222
PRDM4	ENST00000550376.5	0.00180156	0.041847	3.23347	1.03599	2.54118	3.61764	1.00399	0.477094	0.605934	0.605934
MPZL1	ENST00000448405.5	0.00180762	0.0419579	0.861996	0.276268	5.49575	0.328827	0.0618676	0.0526184	0.050581	0.0526184
DMTN	ENST00000522148.5	0.00181179	0.0420313	2.80826	0.900236	1.63205	2.25629	0.150515	0.354833	1.06512	1.06512
LMF2	ENST00000504717.1	0.00181541	0.0420642	3.61808	1.16006	2.37349	3.60563	1.34146	-0.0927114	0.677142	0.677142
LRRC3	ENST00000291592.6	0.00181644	0.0420732	0.608981	0.195267	5.43719	0.107845	0.00456754	0.0205707	0.0526262	0.0526262
CAMTA2	ENST00000572192.1	0.00181806	0.0420822	3.68718	1.18238	2.91526	4.5432	0.416832	1.68019	0.465241	1.68019
RNASEH2A	ENST00000593017.2	0.00181895	0.0420822	3.97614	1.2751	1.76174	3.79916	1.45053	-0.991163	0.988272	0.988272
STAT6	ENST00000300134.8	0.00182224	0.0421181	0.636885	0.204276	7.10007	0.188067	0.00505627	0.0575365	0.0262259	0.0575365
BCKDK	ENST00000219794.11	0.00182651	0.0421573	0.755674	0.24243	6.03121	0.240798	0.0201994	0.0679591	0.0371496	0.0679591
DTYMK	ENST00000305784.7	0.00183522	0.0422986	0.632536	0.203017	5.81137	0.122512	0.00609013	0.0557338	0.0416673	0.0557338
RELB	ENST00000625761.2	0.00183815	0.042327	4.76196	1.52862	3.98765	7.37879	2.74481	0.760198	0.182667	0.760198
P4HB	ENST00000415593.5	0.00184215	0.0423687	1.34846	0.432951	7.1295	0.568469	0.223145	0.058025	0.0260927	0.058025
SARM1	ENST00000585453.5	0.00184565	0.0424045	1.1659	0.374406	4.66979	0.441159	0.114679	-0.0413082	0.0955912	0.0955912
CIRBP	ENST00000621399.1	0.00185055	0.0424901	0.973328	0.312643	4.63387	0.214567	0.0480648	0.00116433	0.0985536	0.0985536
RHOC	ENST00000339083.11	0.00185067	0.0424901	0.926588	0.297631	5.83838	0.217447	0.0918291	-0.0442034	0.0410476	0.0410476
PLAGL1	ENST00000647988.1	0.001861	0.0426621	3.39296	1.09043	2.48765	3.70989	1.1555	0.53048	0.628068	0.628068
EXOSC4	ENST00000316052.6	0.00186411	0.0427089	0.636284	0.204523	5.3441	0.134727	0.0065767	0.042823	0.0561675	0.0561675
TMEM175	ENST00000438836.6	0.00187165	0.0428666	4.06481	1.30706	1.74604	3.79469	1.56527	-1.13275	0.997358	0.997358
SCNN1A	ENST00000228916.7	0.00187416	0.0428925	4.27599	1.37514	3.25518	5.95042	0.932437	1.90409	0.357588	1.90409
RARG	ENST00000543726.1	0.00187475	0.0428925	3.58629	1.15338	1.73933	3.43135	0.994153	-0.860629	1.00126	1.00126
DPP10	ENST00000393147.6	0.00188371	0.0430525	1.4514	0.466991	4.07216	0.978045	0.159703	-0.0963617	0.167418	0.167418
XPO6	ENST00000304658.9	0.00188649	0.0430829	0.795463	0.255978	7.16416	0.235106	0.011983	0.0863041	0.025945	0.0863041
MAP4K4	ENST00000350878.8	0.00188704	0.0430829	1.16071	0.373525	7.87779	0.440818	0.148766	0.060515	0.024965	0.060515
GPR78	ENST00000513120.2	0.00188897	0.0430973	3.2738	1.05363	1.35924	2.96689	0.424338	0.334192	1.24088	1.24088
ATP6V0A1	ENST00000343619.8	0.00189094	0.0430976	4.01586	1.29259	5.0434	5.97525	1.63066	0.875502	0.0703976	0.875502
OCEL1	ENST00000602236.5	0.00189212	0.0430976	3.28572	1.05764	1.34329	2.50086	0.426132	-0.255339	1.25176	1.25176
BORCS6	ENST00000389017.5	0.00189756	0.043203	0.645021	0.207682	5.27074	0.109469	0.00547149	0.00936568	0.0592261	0.0592261
PRKD3	ENST00000234179.7	0.00190346	0.0433223	4.75669	1.532	4.8795	8.07869	1.65878	1.86174	0.0802784	1.86174
MEF2B	ENST00000409224.5	0.00190806	0.0433968	3.14805	1.01413	1.40452	2.63129	0.33234	-0.124112	1.21035	1.21035
ATG4B	ENST00000482507.5	0.0019135	0.0434471	1.03598	0.333826	4.93466	0.328403	0.0262992	0.14086	0.0767645	0.14086
NA	ENST00000650692.1	0.00191503	0.0434496	0.987091	0.318098	4.63838	0.252677	0.0536038	0.0298583	0.0981756	0.0981756
ZDHHC4	ENST00000396709.5	0.00192293	0.0435834	3.40654	1.09821	2.57584	3.7282	1.11891	0.690199	0.591889	0.690199
PRKAR2A	ENST00000296446.12	0.00192687	0.0436426	3.5233	1.13608	1.79382	4.14801	0.966132	-0.117132	0.969888	0.969888
FLNA	ENST00000474358.5	0.00192621	0.0436426	1.02107	0.329231	4.46455	0.343772	0.0485597	0.0900277	0.11403	0.11403
SGSM3	ENST00000427834.5	0.00192918	0.0436648	3.55691	1.14705	1.35848	3.91285	0.73218	1.09819	1.2414	1.2414
EBF4	ENST00000380648.8	0.00194913	0.0439946	3.12643	1.00922	3.41083	3.16502	1.21305	-0.116132	0.314729	0.314729
SMG6	ENST00000570756.5	0.00195459	0.0440903	1.21706	0.392974	5.52035	0.440968	0.181882	-0.0495629	0.0497615	0.0497615
BACE1	ENST00000528053.5	0.00195669	0.0441197	0.707944	0.22861	6.26473	0.23926	0.0244011	0.053993	0.0334668	0.053993
TPBG	ENST00000535040.4	0.00196074	0.0441805	1.60599	0.518711	3.90496	0.723202	0.204763	0.0828688	0.19883	0.19883
TPBG	ENST00000634817.1	0.00196074	0.0441805	1.60599	0.518711	3.90496	0.723202	0.204763	0.0828688	0.19883	0.19883
CLTA	ENST00000538225.5	0.00196867	0.0443271	3.386	1.09405	2.51231	3.5519	1.17762	0.361978	0.617803	0.617803
LRRC8A	ENST00000372600.8	0.00196928	0.0443271	0.894689	0.289092	7.34506	0.325558	0.013758	0.111603	0.0253296	0.111603
KIAA0895L	ENST00000561679.5	0.00197933	0.0445075	1.11602	0.360785	4.6154	0.383425	0.0231712	0.172078	0.100118	0.172078
IL11	ENST00000587093.1	0.00198674	0.0446434	1.96685	0.636068	2.93156	1.05403	0.147233	0.0808813	0.45964	0.45964
IPO4	ENST00000561462.5	0.00199259	0.0446981	3.91784	1.26736	1.8016	3.70064	1.44384	-1.20833	0.965469	0.965469
SPARC	ENST00000520687.1	0.0019913	0.0446981	1.08012	0.349382	10.5889	0.493897	5.48634e-05	0.183047	0.0750405	0.183047
IPO4	ENST00000645096.1	0.00199259	0.0446981	3.91784	1.26736	1.8016	3.70064	1.44384	-1.20833	0.965469	0.965469
RASGRP1	ENST00000450598.6	0.00199769	0.0447665	4.03233	1.30472	1.67602	5.22816	1.51484	1.01728	1.03859	1.03859
TGFB1	ENST00000221930.5	0.00202278	0.045205	0.926482	0.300137	7.971	0.347803	0.000372227	0.134751	0.0251201	0.134751
CDC25B	ENST00000467519.5	0.00203499	0.0454312	3.53339	1.14532	2.8314	4.29622	1.47286	-0.1271	0.494763	0.494763
EPS8L1	ENST00000587786.5	0.00203658	0.0454425	1.47485	0.478095	3.90614	0.668914	0.144273	0.172561	0.198589	0.198589
DNAJC22	ENST00000551153.1	0.00203983	0.0454486	2.82098	0.914605	2.09893	2.9287	0.144062	1.11069	0.806655	1.11069
MYEF2	ENST00000561151.1	0.00203804	0.0454486	3.05043	0.988911	2.19921	3.04532	0.709496	0.222962	0.757421	0.757421
RFXANK	ENST00000303088.9	0.00203994	0.0454486	4.14976	1.34542	2.86873	4.95879	2.23376	-0.694557	0.481477	0.481477
PPP1R32	ENST00000338608.7	0.00204261	0.0454885	2.7186	0.881527	2.26456	3.35874	0.439118	0.615257	0.726517	0.726517
ASPHD1	ENST00000483405.5	0.00204335	0.0454885	2.09014	0.677766	3.70341	1.84714	0.446238	-0.15481	0.242813	0.242813
FKBP10	ENST00000490938.5	0.00204381	0.0454885	1.39903	0.453672	4.37643	0.635598	0.0381192	0.270609	0.123549	0.270609
PROSER2	ENST00000379200.1	0.00204685	0.0455098	3.07612	0.997656	3.47868	3.11364	0.707819	0.785158	0.297289	0.785158
ZNF738	ENST00000380870.8	0.00204977	0.0455482	0.789186	0.255986	4.95124	0.160277	0.0225462	0.0129592	0.0757471	0.0757471
SLC1A5	ENST00000542575.6	0.00205816	0.0456837	0.682134	0.221349	7.98217	0.181283	0.000937026	0.0725562	0.0251431	0.0725562
SPPL2B	ENST00000610743.4	0.00206333	0.0457829	0.964949	0.313197	5.51314	0.302607	0.0971396	-0.00930303	0.0499994	0.0499994
CASP8	ENST00000432109.6	0.00206438	0.0457905	3.95439	1.28355	1.79933	4.86965	1.50451	0.93835	0.966755	0.966755
RPS9	ENST00000616536.4	0.00207431	0.0459331	0.740087	0.240336	5.71094	0.181139	0.0222067	0.0644357	0.0441529	0.0644357
STXBP2	ENST00000601061.1	0.00207798	0.0459677	3.12955	1.01647	1.75494	2.39347	0.557604	0.136348	0.992198	0.992198
PLEKHM1P1	ENST00000578036.5	0.00207989	0.0459788	0.743781	0.241599	4.9561	0.12833	0.0121028	0.00485981	0.075452	0.075452
FAM50A	ENST00000478509.1	0.00207936	0.0459788	2.93664	0.953871	1.76892	2.24894	0.38067	0.0208858	0.984135	0.984135
PATJ	ENST00000307297.8	0.00208769	0.0460735	4.04156	1.31328	1.28615	3.81901	1.29574	-0.292439	1.2913	1.2913
RAP1B	ENST00000450214.6	0.00209418	0.0462011	3.62751	1.17909	2.96669	4.62758	0.875613	1.20976	0.447713	1.20976
PCOLCE	ENST00000496269.1	0.00209772	0.0462636	2.25993	0.734688	2.34104	1.85064	0.118065	0.684119	0.691584	0.691584
KCTD17	ENST00000462640.1	0.00210363	0.0463785	0.944382	0.307096	4.38593	0.3217	0.0174121	0.12405	0.122455	0.12405
INO80B	ENST00000233331.12	0.00211239	0.0465053	0.814813	0.26507	4.89131	0.207727	0.0258834	0.0275123	0.0795096	0.0795096
IMPA2	ENST00000269159.8	0.0021323	0.0467897	1.72772	0.562562	4.04764	0.947807	0.283133	0.191581	0.171707	0.191581
PCDH18	ENST00000510305.5	0.00214864	0.0470695	2.73892	0.892483	3.24341	3.12209	0.51689	0.677899	0.360993	0.677899
CHST12	ENST00000432336.1	0.00215081	0.0470828	0.978384	0.31884	4.38088	0.321573	0.0294537	0.0130455	0.123034	0.123034
CHD2	ENST00000625662.2	0.00215847	0.0472057	0.991865	0.323345	6.55336	0.302083	0.0257168	0.131111	0.030105	0.131111
ERF	ENST00000440177.6	0.00216117	0.047249	1.33901	0.436566	5.97834	0.557513	0.247753	-0.0757479	0.0381324	0.0381324
TRAF4	ENST00000478021.1	0.00216866	0.0473811	1.21796	0.397233	3.86375	0.312592	0.0293717	0.00604124	0.207319	0.207319
NCKIPSD	ENST00000454134.1	0.00217416	0.0474697	2.86363	0.934194	2.01486	2.58092	0.459501	0.563492	0.849578	0.849578
MEN1	ENST00000450708.5	0.0021848	0.0476006	3.15247	1.02891	1.70923	3.57968	0.569101	-0.328274	1.01888	1.01888
SHROOM4	ENST00000460112.3	0.00218489	0.0476006	4.26472	1.39194	3.25921	5.99449	1.94257	0.963658	0.356428	0.963658
CDK10	ENST00000472018.5	0.00218863	0.0476425	0.728355	0.237763	5.40805	0.163081	0.0275686	0.0572283	0.0536955	0.0572283
AXL	ENST00000359092.7	0.00218814	0.0476425	1.45927	0.476353	5.60864	0.981064	0.201397	0.138971	0.0470064	0.138971
SLC22A5	ENST00000245407.7	0.00219125	0.0476838	0.682579	0.222846	5.40329	0.163036	0.0109333	0.0635573	0.0538734	0.0635573
TEKT2	ENST00000207457.8	0.00219364	0.0477199	2.7837	0.90891	2.14353	3.04127	0.320435	0.918742	0.784497	0.918742
POLR3D	ENST00000397802.8	0.00220787	0.0479339	0.649394	0.212169	6.25929	0.171604	0.0339817	0.0246954	0.0335417	0.0335417
TNFRSF1A	ENST00000162749.6	0.00221439	0.0479983	0.723354	0.236401	7.36073	0.21059	0.0014782	0.0823498	0.0252884	0.0823498
TINF2	ENST00000267415.12	0.00221597	0.0479983	3.03366	0.991507	1.95196	4.69691	0.591926	0.261242	0.882704	0.882704
TINF2	ENST00000646576.2	0.00221597	0.0479983	3.03366	0.991507	1.95196	4.69691	0.591926	0.261242	0.882704	0.882704
SLC10A3	ENST00000369649.8	0.00221493	0.0479983	3.28093	1.07227	2.31643	3.21983	1.02197	-0.0183569	0.702685	0.702685
KRT18	ENST00000549078.5	0.00222027	0.0480596	0.80759	0.263999	5.21487	0.293395	0.0207533	0.0837897	0.0617254	0.0837897
HGH1	ENST00000347708.5	0.00222706	0.0481111	0.668514	0.2186	5.53188	0.174246	0.0222936	0.0342884	0.0493856	0.0493856
LAMB2	ENST00000469665.1	0.00223511	0.0482305	0.976275	0.31935	4.40751	0.216019	0.0329437	0.0160485	0.120033	0.120033
CHST14	ENST00000306243.6	0.00224314	0.0483626	0.626038	0.204856	5.44233	0.123227	0.0105075	0.0265341	0.0524413	0.0524413
PLEKHG2	ENST00000205135.8	0.00225083	0.0484588	0.612534	0.200504	6.80438	0.140028	0.00608038	0.0542225	0.027976	0.0542225
SPARC	ENST00000231061.9	0.0022513	0.0484588	1.04077	0.340688	10.138	0.49681	0.000166547	0.173936	0.0561219	0.173936
CAST	ENST00000511097.6	0.0022596	0.0486055	3.39137	1.11054	2.86169	4.13586	0.472867	1.37708	0.483967	1.37708
BSCL2	ENST00000407022.7	0.00226729	0.0487369	3.42242	1.12108	2.94427	4.32181	0.488117	1.39712	0.455299	1.39712
CDCA5	ENST00000275517.8	0.00226868	0.0487369	0.85082	0.27872	5.77963	0.224618	0.00366987	0.112857	0.0424214	0.112857
GAREM2	ENST00000401533.7	0.0022714	0.0487472	1.13428	0.371622	4.45174	0.501718	0.0216496	0.185504	0.115327	0.185504
APOE	ENST00000252486.9	0.00227494	0.0488072	0.991309	0.324831	8.40853	0.349967	0.00032759	0.157945	0.0267674	0.157945
FBXL17	ENST00000518486.1	0.002277	0.0488169	3.11136	1.01962	2.00276	4.10755	0.703545	0.0841054	0.855881	0.855881
NFATC1	ENST00000253506.9	0.00228618	0.0489681	4.37429	1.43406	3.74689	6.89415	0.469422	2.61536	0.232836	2.61536
TMEM200B	ENST00000420504.2	0.00229356	0.0490941	3.926	1.2875	3.26365	5.19609	0.470865	2.01561	0.355152	2.01561
BCL3	ENST00000164227.10	0.00229707	0.049137	1.00624	0.330036	5.62584	0.331963	0.0061249	0.157261	0.0465022	0.157261
THAP3	ENST00000307896.10	0.00229669	0.049137	3.68989	1.21023	1.64577	3.24074	1.1402	-0.955046	1.05679	1.05679
SEZ6L2	ENST00000563118.1	0.00232159	0.0495643	3.00152	0.985504	1.39134	2.56827	0.237641	-0.0877598	1.21918	1.21918
ACCS	ENST00000263776.8	0.00232892	0.0496525	0.945345	0.310486	4.52057	0.311091	0.0359855	0.0968253	0.108617	0.108617
SEC24D	ENST00000280551.11	0.00232951	0.0496525	0.776989	0.255198	7.99439	0.264952	0.00229962	0.0953896	0.0251694	0.0953896
PIEZO1	ENST00000484567.6	0.00233877	0.0498013	0.743028	0.24414	5.63039	0.187961	0.00737617	0.08203	0.0463705	0.08203
LENG8	ENST00000421200.1	0.0023472	0.0498702	3.22635	1.06047	2.1023	3.23804	0.673695	1.0132	0.804962	1.0132
BCL11A	ENST00000358510.6	0.00234734	0.0498702	3.54675	1.16579	3.13806	4.86282	0.408192	1.63041	0.392493	1.63041
LENG8	ENST00000611220.1	0.0023472	0.0498702	3.22635	1.06047	2.1023	3.23804	0.673695	1.0132	0.804962	1.0132
PSMA7	ENST00000484488.5	0.00235411	0.0499204	0.851163	0.279851	5.24208	0.276375	0.0392384	0.0782362	0.0604895	0.0782362
SUMF2	ENST00000413756.5	0.00235494	0.0499204	1.57528	0.517948	3.90005	0.740494	0.202578	-0.0474417	0.199827	0.199827

## Sheet: WT v UBE2B Null2, WT up
ext_gene	target_id	pval	qval	b	se_b	mean_obs	var_obs	tech_var	sigma_sq	smooth_sigma_sq	final_sigma_sq
AL512646.1	ENST00000269395.6	3.16485e-35	1.03581e-30	-4.94337	0.399153	5.19915	5.87307	0.0441565	0.194828	0.0624563	0.194828
NEXN	ENST00000342754.5	1.87679e-24	1.75499e-20	-1.46059	0.14312	7.09501	0.484437	0.00447562	0.0261697	0.0262495	0.0262495
PDLIM5	ENST00000508216.5	1.71645e-21	1.40442e-17	-1.76465	0.185344	6.51446	0.748027	0.0128858	0.0386429	0.0304948	0.0386429
SH3BGR	ENST00000380634.5	7.89984e-21	5.74555e-17	-1.57812	0.168585	6.3933	0.606744	0.0108023	0.0282182	0.0318289	0.0318289
NEXN	ENST00000334785.11	2.77672e-19	1.81756e-15	-1.29602	0.144368	8.27134	0.404897	0.000656063	0.0306069	0.0260813	0.0306069
NEXN	ENST00000440324.5	2.30561e-18	1.25765e-14	-1.55409	0.177789	6.21782	0.533868	0.0132849	0.0192544	0.0341283	0.0341283
POPDC2	ENST00000493094.5	3.3615e-18	1.46689e-14	-1.28727	0.147987	8.24899	0.368377	0.000816728	0.0320333	0.0259846	0.0320333
MYOM1	ENST00000261606.11	1.17361e-16	3.65814e-13	-1.52006	0.183455	7.7808	0.540619	0.0153591	0.0351243	0.0248733	0.0351243
CDC42EP3	ENST00000611976.1	2.00427e-16	5.70405e-13	-1.34382	0.163445	8.03829	0.488147	0.00493297	0.0351384	0.0252734	0.0351384
MTRNR2L11	ENST00000604646.1	7.08271e-16	1.93172e-12	-1.06487	0.13197	7.82148	0.257509	0.000391829	0.0257322	0.0249032	0.0257322
MT-ND3	ENST00000361227.2	6.09852e-15	1.37652e-11	-1.43617	0.18408	9.97029	0.443235	4.6891e-05	0.037977	0.0507812	0.0507812
JAK2	ENST00000381652.3	1.10975e-14	2.41274e-11	-1.25846	0.162886	6.64349	0.399435	0.00161142	0.0381862	0.0292669	0.0381862
SYNM	ENST00000560674.5	2.1348e-14	3.99251e-11	-1.70284	0.222819	6.18543	0.680813	0.0398662	0.0163615	0.0346065	0.0346065
RAPGEF2	ENST00000264431.8	3.10168e-14	5.63963e-11	-1.43004	0.188312	6.76279	0.504529	0.0229803	0.0302116	0.0282856	0.0302116
MTRNR2L6	ENST00000604952.1	1.71902e-13	2.81304e-10	-1.67045	0.226686	6.40606	0.641269	0.0309481	0.0461318	0.0316793	0.0461318
ROR1	ENST00000545203.2	2.13373e-13	3.40652e-10	-1.35078	0.184026	7.28452	0.456109	0.0231285	0.0276699	0.0255069	0.0276699
CYP2J2	ENST00000371204.4	5.4317e-13	7.90094e-10	-1.33651	0.185265	5.67907	0.466457	0.00647963	0.0348561	0.0450052	0.0450052
ITGB1	ENST00000423113.5	5.56383e-13	7.91721e-10	-1.32268	0.183431	8.41051	0.455797	0.00301427	0.047456	0.0267785	0.047456
RNF115	ENST00000582693.5	7.00912e-13	9.55825e-10	-0.935493	0.130305	7.71314	0.213646	0.000618037	0.017222	0.0248511	0.0248511
PDE4DIP	ENST00000618462.4	1.08001e-12	1.44274e-09	-0.988756	0.138872	7.53169	0.298788	0.00396841	0.0243654	0.0249598	0.0249598
PTPN21	ENST00000328736.7	1.95324e-12	2.45871e-09	-1.10296	0.15672	7.39239	0.264004	0.0116308	0.000362003	0.0252108	0.0252108
OXCT1	ENST00000196371.10	2.01121e-12	2.48392e-09	-0.917099	0.130386	7.6811	0.211841	0.000648462	0.0199391	0.0248524	0.0248524
MYO18B	ENST00000335473.11	2.73427e-12	3.25413e-09	-1.30411	0.186548	7.13611	0.404377	0.0261363	0.0250674	0.0260638	0.0260638
MYOCD	ENST00000425538.5	2.95075e-12	3.44905e-09	-0.958874	0.137374	8.60469	0.27864	0.000265708	0.0225074	0.0280415	0.0280415
KLHL13	ENST00000469946.5	3.1217e-12	3.58486e-09	-1.20952	0.173479	5.99609	0.330983	0.00734703	0.0206224	0.0377956	0.0377956
ETV1	ENST00000405192.6	3.19744e-12	3.60853e-09	-6.79517	0.975091	3.4162	9.92019	1.11288	-0.941771	0.313321	0.313321
TNNT2	ENST00000438742.6	4.76229e-12	5.19541e-09	-1.07224	0.155116	6.892	0.280213	0.00871505	0.0196469	0.0273766	0.0273766
RPL21	ENST00000493317.1	9.70054e-12	1.04093e-08	-1.38091	0.202751	6.93211	0.485861	0.0195145	0.0421473	0.0271255	0.0421473
IL2RG	ENST00000374202.6	1.04669e-11	1.10506e-08	-6.71789	0.987935	2.2287	9.98983	0.286463	1.17756	0.743352	1.17756
CPEB4	ENST00000334035.9	1.23404e-11	1.28217e-08	-1.26245	0.186307	6.6151	0.399247	0.0104919	0.0415734	0.0295215	0.0415734
SORBS2	ENST00000448662.6	1.66283e-11	1.67452e-08	-0.977265	0.145147	8.63504	0.224848	0.00105347	0.0305481	0.0282714	0.0305481
POPDC2	ENST00000341124.9	2.29542e-11	2.24256e-08	-1.20653	0.18046	7.6511	0.358098	0.00487585	0.0439728	0.0248606	0.0439728
HACD1	ENST00000361271.8	2.51915e-11	2.42494e-08	-0.966604	0.144869	6.66169	0.233697	0.00237265	0.0275579	0.029108	0.029108
LRRC49	ENST00000560158.6	2.67752e-11	2.47184e-08	-2.19961	0.330108	6.15048	1.0735	0.0117859	0.151671	0.0351435	0.151671
CFL2	ENST00000556161.1	5.38487e-11	4.29851e-08	-1.14202	0.174091	5.96545	0.353267	0.00708041	0.0371914	0.0383812	0.0383812
FBXO32	ENST00000517956.5	6.12736e-11	4.83227e-08	-0.851144	0.130132	7.84643	0.197262	0.000474071	0.0134809	0.0249276	0.0249276
BVES	ENST00000314641.10	8.27979e-11	6.37612e-08	-1.26967	0.195471	8.8274	0.37866	0.000235357	0.0570779	0.0299476	0.0570779
CNN1	ENST00000586059.5	8.82336e-11	6.63852e-08	-1.27642	0.1968	5.73104	0.427726	0.014464	0.00551999	0.0436315	0.0436315
PCGF5	ENST00000490164.1	1.15534e-10	8.22012e-08	-1.22481	0.190038	5.67231	0.340138	0.00402122	0.0501505	0.0451901	0.0501505
MT-ATP8	ENST00000361851.1	1.30007e-10	9.05305e-08	-1.32912	0.206797	9.26104	0.402277	9.6905e-05	0.0640507	0.0353289	0.0640507
TTN	ENST00000360870.9	1.39874e-10	9.63762e-08	-1.55268	0.242	8.11845	0.724659	0.000510922	0.0873353	0.0255021	0.0873353
LRRFIP2	ENST00000336686.9	1.51556e-10	1.00668e-07	-1.18313	0.184754	6.01797	0.41388	0.00727706	0.0439239	0.03739	0.0439239
CMYA5	ENST00000446378.3	1.52255e-10	1.00668e-07	-1.49453	0.233408	7.68988	0.752358	0.000648009	0.0810709	0.0248513	0.0810709
MTRNR2L1	ENST00000540040.2	1.64278e-10	1.07531e-07	-1.00565	0.157342	9.36734	0.227563	8.65553e-05	0.0191437	0.037048	0.037048
PPP1R12B	ENST00000608999.6	2.36364e-10	1.48766e-07	-1.75511	0.277022	9.2457	0.808175	0.00161763	0.113494	0.0350952	0.113494
GYG1	ENST00000296048.10	2.40075e-10	1.49663e-07	-0.895067	0.141329	8.06383	0.212019	0.000360929	0.0295997	0.0253408	0.0295997
SVIL-AS1	ENST00000427063.6	2.4666e-10	1.50894e-07	-4.17255	0.659269	2.57664	5.05131	0.0603865	0.153579	0.591567	0.591567
POPDC2	ENST00000474523.5	3.03125e-10	1.82034e-07	-1.40989	0.223893	5.69592	0.517469	0.0306417	0.0430256	0.0445504	0.0445504
LMOD2	ENST00000458573.3	3.12878e-10	1.84505e-07	-1.39288	0.221364	7.34051	0.613851	0.000790174	0.0727131	0.025342	0.0727131
PROS1	ENST00000648381.1	3.20479e-10	1.873e-07	-1.351	0.214835	7.05078	0.461654	0.0344992	0.0347318	0.026465	0.0347318
TIPARP	ENST00000295924.12	3.28421e-10	1.90243e-07	-0.864484	0.137553	7.30861	0.212853	0.00161034	0.0267709	0.025433	0.0267709
PGGT1B	ENST00000419445.6	3.44234e-10	1.97654e-07	-1.03025	0.16412	6.0035	0.345479	0.0027458	0.0113982	0.0376571	0.0376571
HM13	ENST00000649583.1	3.76769e-10	2.12605e-07	-3.19017	0.509339	4.15821	2.55124	0.235889	-0.17501	0.153251	0.153251
AKAP6	ENST00000280979.9	5.09764e-10	2.804e-07	-1.41823	0.228155	7.48322	0.524257	0.000842592	0.0772397	0.0250305	0.0772397
HMGB3	ENST00000419110.5	6.1089e-10	3.22476e-07	-5.75307	0.929775	3.18106	8.53522	0.917311	-0.797509	0.379412	0.379412
TNNT2	ENST00000412633.3	7.21252e-10	3.68836e-07	-1.24576	0.20219	9.19048	0.368309	0.00112446	0.0601965	0.0342824	0.0601965
FGF5	ENST00000312465.11	7.59706e-10	3.82523e-07	-1.61187	0.261959	4.94058	0.676	0.0265346	0.0619837	0.0763995	0.0763995
PTP4A2	ENST00000602725.5	7.86372e-10	3.89951e-07	-1.13242	0.184204	7.29449	0.37544	0.025421	0.00127329	0.0254758	0.0254758
MTRNR2L4	ENST00000399974.4	8.0554e-10	3.96453e-07	-0.800765	0.130336	7.52872	0.141251	0.000517747	0.0119083	0.0249636	0.0249636
POPDC3	ENST00000254765.4	8.9383e-10	4.30202e-07	-1.37581	0.224538	5.91691	0.481603	0.00496481	0.070661	0.0393532	0.070661
MLIP	ENST00000274897.9	9.59696e-10	4.58532e-07	-1.33667	0.218554	6.19962	0.47306	0.00526677	0.066382	0.0343948	0.066382
STRIP2	ENST00000435494.2	1.0385e-09	4.92589e-07	-1.42079	0.232788	5.34509	0.466308	0.0251578	0.0319695	0.0561278	0.0561278
SORBS2	ENST00000490779.5	1.09776e-09	5.16948e-07	-1.44759	0.237524	5.60653	0.558167	0.00683826	0.0777884	0.0470689	0.0777884
KANSL3	ENST00000420155.5	1.16316e-09	5.43836e-07	-1.17308	0.192774	6.31418	0.304574	0.0229351	0.0255542	0.0328075	0.0328075
PRKAG2	ENST00000418337.6	1.49322e-09	6.78762e-07	-1.10182	0.182267	6.85182	0.294355	0.00721425	0.0426176	0.0276427	0.0426176
MYL12B	ENST00000400175.9	1.53206e-09	6.91615e-07	-1.53077	0.253399	6.24428	0.497703	0.062566	-0.0201259	0.0337507	0.0337507
PTGES3L	ENST00000424284.5	1.9822e-09	8.70799e-07	-1.24393	0.207348	5.3897	0.338878	0.010103	0.0288647	0.0543868	0.0543868
POPDC2	ENST00000264231.7	2.30848e-09	1.0007e-06	-1.17443	0.196575	8.19732	0.316286	0.00116274	0.0567998	0.0257771	0.0567998
UGP2	ENST00000613823.1	2.57636e-09	1.09507e-06	-0.818075	0.137341	8.25139	0.169394	0.00229887	0.0189093	0.0259948	0.0259948
SCHIP1	ENST00000482804.1	2.61136e-09	1.10278e-06	-1.16647	0.195902	6.53968	0.330172	0.00601403	0.0515524	0.0302401	0.0515524
NAV1	ENST00000367295.5	2.63261e-09	1.10463e-06	-1.48706	0.249799	9.39346	0.53527	0.000283178	0.0933163	0.0374979	0.0933163
GHR	ENST00000357703.6	2.85393e-09	1.17843e-06	-1.48594	0.250167	5.82288	0.680201	0.0218946	0.0719808	0.0414009	0.0719808
FILIP1	ENST00000393004.6	3.16717e-09	1.29571e-06	-1.23851	0.209113	8.07825	0.472352	0.000670877	0.0649217	0.0253811	0.0649217
CLGN	ENST00000325617.10	3.19273e-09	1.29805e-06	-0.925338	0.156271	6.79075	0.252509	0.00116933	0.0354616	0.0280757	0.0354616
OPHN1	ENST00000355520.6	3.6344e-09	1.45949e-06	-0.796342	0.134973	7.07835	0.15356	0.000997632	0.013277	0.0263288	0.0263288
PCGF5	ENST00000336126.6	3.93924e-09	1.57226e-06	-1.24923	0.212211	6.34851	0.360888	0.0351782	-0.0144319	0.0323719	0.0323719
TRIM55	ENST00000353317.9	4.4873e-09	1.75883e-06	-1.21833	0.207724	7.55294	0.365505	0.00301604	0.061708	0.0249344	0.061708
RHOQ	ENST00000473428.1	4.64352e-09	1.7948e-06	-1.07197	0.182946	6.41645	0.442472	0.00420936	0.0459945	0.0315592	0.0459945
NEBL	ENST00000493005.5	4.74971e-09	1.81814e-06	-1.50475	0.256971	5.66004	0.513103	0.0114678	0.0875833	0.0455294	0.0875833
IFT81	ENST00000552912.5	4.80578e-09	1.82891e-06	-0.977456	0.166979	6.31266	0.283513	0.00899573	0.0149972	0.0328273	0.0328273
SLK	ENST00000335753.8	5.35063e-09	2.01285e-06	-0.825552	0.141461	7.71337	0.23624	0.00516591	0.0132227	0.0248511	0.0248511
CD52	ENST00000374213.3	5.32301e-09	2.01285e-06	-5.79243	0.992408	2.67086	8.2248	0.100702	1.37661	0.554485	1.37661
CNOT11	ENST00000462489.1	6.33626e-09	2.31772e-06	-1.13618	0.195635	5.66091	0.283715	0.0119044	0.0194159	0.0455052	0.0455052
CFL2	ENST00000341223.7	6.80608e-09	2.47503e-06	-0.960239	0.165683	7.13174	0.253222	0.00181648	0.0393598	0.0260829	0.0393598
SAMD4A	ENST00000392067.7	7.37599e-09	2.63831e-06	-0.919983	0.159108	7.2715	0.244876	0.0124243	0.0230593	0.0255488	0.0255488
MTCO2P22	ENST00000603246.1	8.66872e-09	3.01824e-06	-1.50678	0.261826	4.73775	0.537341	0.0104107	0.0924183	0.09027	0.0924183
CYCS	ENST00000305786.6	9.04486e-09	3.12668e-06	-0.852326	0.148289	7.76815	0.223618	0.000627037	0.0323575	0.0248666	0.0323575
RICTOR	ENST00000357387.8	1.15959e-08	3.91255e-06	-0.812487	0.142403	7.03775	0.20225	0.00388612	0.020159	0.0265316	0.0265316
CD69	ENST00000228434.7	1.20574e-08	4.02674e-06	-5.30823	0.931446	3.06701	7.29514	0.237146	1.06424	0.414792	1.06424
RBPMS	ENST00000519647.5	1.23394e-08	4.10001e-06	-5.15385	0.904982	2.7155	5.62447	0.691035	0.163924	0.537455	0.537455
AGL	ENST00000370163.7	1.26772e-08	4.1699e-06	-1.44114	0.25326	6.88539	0.555451	0.0543072	0.0419039	0.0274194	0.0419039
RSL1D1	ENST00000355674.9	1.3912e-08	4.53053e-06	-1.07207	0.188929	6.18008	0.303883	0.0173618	0.0361794	0.0346874	0.0361794
SORBS2	ENST00000421420.5	1.43837e-08	4.66095e-06	-1.32589	0.233894	5.24776	0.493568	0.012969	0.0690909	0.0602358	0.0690909
LDB3	ENST00000429277.6	1.49332e-08	4.79597e-06	-1.25266	0.221226	8.36912	0.407504	0.00230506	0.0711066	0.0265536	0.0711066
CLTC	ENST00000472651.5	1.49469e-08	4.79597e-06	-1.03112	0.182106	5.78248	0.274408	0.00739148	0.0245067	0.0423526	0.0423526
UNC45B	ENST00000394570.6	1.55215e-08	4.932e-06	-1.1698	0.206835	8.51453	0.344542	0.000897527	0.0632736	0.0274114	0.0632736
STRIP2	ENST00000249344.7	1.56463e-08	4.94764e-06	-1.61957	0.28643	7.40794	0.632728	0.00122641	0.121837	0.0251755	0.121837
ZBTB44	ENST00000525842.5	1.67867e-08	5.28271e-06	-1.07102	0.189823	6.2629	0.283787	0.020557	0.032764	0.0334919	0.0334919
SVIL	ENST00000632315.1	2.14337e-08	6.43572e-06	-0.76118	0.135925	7.42907	0.145834	0.00258288	0.0159492	0.0251304	0.0251304
STK39	ENST00000355999.5	2.26145e-08	6.72853e-06	-1.07238	0.191814	7.98781	0.288368	0.000320905	0.0548682	0.0251551	0.0548682
NCL	ENST00000494618.1	2.44714e-08	7.24809e-06	-0.834389	0.149613	6.80542	0.18059	0.00560746	0.0126782	0.0279685	0.0279685
LMO7	ENST00000489941.6	2.6556e-08	7.83006e-06	-1.2184	0.219029	5.28841	0.467529	0.00993454	0.0620258	0.0584669	0.0620258
ANKRD18A	ENST00000399703.6	2.84731e-08	8.35767e-06	-1.40378	0.252906	4.94379	0.471928	0.00917827	0.0867642	0.0762019	0.0867642
KAT7	ENST00000259021.9	3.02231e-08	8.71504e-06	-0.749268	0.135244	7.11257	0.125126	0.0012678	0.0123932	0.0261684	0.0261684
HACD1	ENST00000466335.1	3.05575e-08	8.77281e-06	-1.34221	0.242354	6.17018	0.444832	0.00377749	0.0843258	0.0348381	0.0843258
LDB3	ENST00000361373.8	3.13967e-08	8.93536e-06	-1.12577	0.203447	9.71867	0.343999	0.000190067	0.0618961	0.0441248	0.0618961
FERMT2	ENST00000554152.5	3.69617e-08	1.03837e-05	-1.45701	0.26468	7.21473	0.543131	0.00568716	0.0993964	0.0257469	0.0993964
FRMD3	ENST00000621208.4	4.28566e-08	1.18365e-05	-2.12254	0.38742	6.5851	1.13369	0.0856743	0.139467	0.0297998	0.139467
MTRNR2L8	ENST00000536684.2	4.48684e-08	1.22757e-05	-0.977721	0.178725	9.86608	0.213649	7.24894e-05	0.0165791	0.0478415	0.0478415
CTNNB1	ENST00000396183.7	4.83936e-08	1.30897e-05	-0.845179	0.154877	7.49803	0.214612	0.0109731	0.0226045	0.025007	0.025007
RBMS1	ENST00000392753.7	5.0641e-08	1.35853e-05	-1.27306	0.23363	6.93881	0.368575	0.0547896	0.0125379	0.0270849	0.0270849
USF2	ENST00000343550.9	5.11573e-08	1.36678e-05	-1.27187	0.23349	5.71547	0.38153	0.037742	0.0416655	0.0440342	0.0440342
DUSP27	ENST00000361200.6	5.88715e-08	1.54142e-05	-1.0513	0.193889	7.46766	0.326061	0.00142918	0.0549603	0.0250569	0.0549603
RNF10	ENST00000413266.6	5.91363e-08	1.54218e-05	-0.728015	0.134286	7.78415	0.113109	0.00217363	0.00903849	0.0248753	0.0248753
TOP2B	ENST00000264331.8	6.15086e-08	1.59769e-05	-1.29249	0.238715	6.9478	0.7609	0.0584461	-0.0304226	0.0270311	0.0270311
SLC16A1	ENST00000630362.2	6.96713e-08	1.74731e-05	-0.809371	0.150105	7.90003	0.186845	0.000217888	0.0335796	0.024996	0.0335796
SLC16A1	ENST00000369626.7	6.96713e-08	1.74731e-05	-0.809371	0.150105	7.90003	0.186845	0.000217888	0.0335796	0.024996	0.0335796
CCL5	ENST00000605140.6	7.07247e-08	1.76696e-05	-3.65583	0.678347	3.45749	3.33154	0.387576	-0.00557253	0.302656	0.302656
MASP1	ENST00000392470.6	7.33611e-08	1.81208e-05	-0.975506	0.181229	6.6458	0.238813	0.00896805	0.0402976	0.0292465	0.0402976
PLN	ENST00000357525.6	7.33401e-08	1.81208e-05	-1.38295	0.256921	10.04	0.552823	4.62316e-05	0.0989662	0.0529063	0.0989662
SET	ENST00000372686.5	7.55262e-08	1.85336e-05	-0.90072	0.167498	7.07033	0.2014	0.0157156	0.0164291	0.0263677	0.0263677
NCOA4	ENST00000585132.5	9.50597e-08	2.25695e-05	-0.895032	0.167737	7.16533	0.218639	0.0162634	0.0141169	0.0259402	0.0259402
RPS3	ENST00000528439.5	9.46719e-08	2.25695e-05	-4.74559	0.889242	3.1353	5.08886	0.792783	0.135274	0.393344	0.393344
COX5A	ENST00000568517.1	1.03092e-07	2.41866e-05	-0.829461	0.155879	7.64144	0.183518	0.000742328	0.0357051	0.0248647	0.0357051
TPM1	ENST00000403994.8	1.05783e-07	2.46413e-05	-1.23725	0.232719	10.4759	0.36758	0.000198047	0.0810389	0.0695849	0.0810389
SLC25A3	ENST00000551917.5	1.11252e-07	2.54623e-05	-1.27394	0.240035	6.89778	0.507801	0.00769606	0.0787293	0.0273395	0.0787293
SMPX	ENST00000379494.4	1.24624e-07	2.80326e-05	-1.4122	0.26713	7.91723	0.520128	0.00153324	0.105504	0.0250225	0.105504
MTND2P28	ENST00000457540.1	1.2695e-07	2.83609e-05	-1.16383	0.220289	7.48749	0.31321	0.00077878	0.0720123	0.0250236	0.0720123
ASB2	ENST00000555019.5	1.36509e-07	2.99847e-05	-1.31464	0.249462	6.8695	0.405907	0.00216861	0.0911787	0.0275238	0.0911787
ASB2	ENST00000612647.3	1.36509e-07	2.99847e-05	-1.31464	0.249462	6.8695	0.405907	0.00216861	0.0911787	0.0275238	0.0911787
IDH3A	ENST00000558535.1	1.3822e-07	3.02591e-05	-0.881154	0.167278	6.99118	0.232547	0.00176745	0.0402055	0.0267815	0.0402055
MEF2C	ENST00000637481.1	1.39486e-07	3.04345e-05	-1.14498	0.217432	6.5084	0.395535	0.0214275	0.0494874	0.0305572	0.0494874
SLC25A12	ENST00000422440.7	1.6854e-07	3.55736e-05	-0.823019	0.157333	6.38463	0.208502	0.00519878	0.0146582	0.0319318	0.0319318
AC145212.1	ENST00000613230.1	1.86482e-07	3.89985e-05	-3.87112	0.742685	2.14696	4.68547	0.0445663	0.00169011	0.782806	0.782806
ITSN2	ENST00000406921.7	1.92457e-07	3.99925e-05	-1.62281	0.311691	6.27041	1.07209	0.0871444	0.0585823	0.0333891	0.0585823
NUDT4P2	ENST00000578341.2	1.97823e-07	4.09775e-05	-0.760795	0.146268	7.01592	0.144881	0.00170161	0.0303899	0.0266465	0.0303899
ANTXR2	ENST00000482406.1	1.99231e-07	4.1139e-05	-0.887604	0.170691	5.91611	0.260785	0.0043337	0.0350203	0.0393696	0.0393696
NPTN	ENST00000345330.8	2.09364e-07	4.29602e-05	-0.726311	0.139922	7.24756	0.165485	0.00373806	0.015742	0.0256292	0.0256292
KRT8	ENST00000549176.1	2.13692e-07	4.35101e-05	-2.20604	0.4253	6.9008	1.71734	0.206494	0.064826	0.0273203	0.064826
NPPA	ENST00000376480.7	2.14038e-07	4.35101e-05	-2.39016	0.460824	8.89661	1.33813	0.000216294	0.318322	0.0306493	0.318322
PHF20L1	ENST00000395390.6	2.22335e-07	4.49179e-05	-0.884661	0.170796	6.43397	0.236699	0.0123972	0.0156571	0.03136	0.03136
ARHGAP23	ENST00000620417.4	2.25184e-07	4.53535e-05	-5.75463	1.11152	3.20359	7.82706	1.48054	-1.2021	0.37268	0.37268
CAMK2D	ENST00000394524.7	2.30804e-07	4.6201e-05	-0.69124	0.133634	7.63987	0.134933	0.00192156	0.024476	0.0248654	0.0248654
AKAP6	ENST00000556638.1	2.35302e-07	4.68152e-05	-1.43495	0.277605	4.60726	0.538612	0.0147801	0.0414707	0.100817	0.100817
PAM	ENST00000379799.7	2.36503e-07	4.69114e-05	-1.05933	0.204976	8.02754	0.315997	0.00209855	0.0609241	0.0252465	0.0609241
POPDC3	ENST00000474760.1	2.52442e-07	4.94733e-05	-1.05927	0.20545	5.53858	0.317112	0.0141452	0.0368808	0.0491692	0.0491692
UNK	ENST00000586527.1	2.59064e-07	5.03055e-05	-0.905698	0.175829	5.76391	0.196207	0.00356808	0.0250413	0.0428055	0.0428055
EIF4G1	ENST00000441154.5	2.62284e-07	5.06441e-05	-5.75697	1.11814	4.28347	6.80083	1.74023	-1.00064	0.135118	0.135118
PALM2AKAP2	ENST00000374525.5	2.7017e-07	5.20132e-05	-0.82921	0.161226	8.96458	0.180337	0.00100877	0.037982	0.0313925	0.037982
MYL6	ENST00000550184.5	2.72815e-07	5.23684e-05	-1.16916	0.227404	6.08683	0.314476	0.00399822	0.0735706	0.0361793	0.0735706
ATP13A3	ENST00000645319.1	2.76657e-07	5.27963e-05	-0.737143	0.14345	8.62833	0.158454	0.00264692	0.0263072	0.0282198	0.0282198
RAB9B	ENST00000243298.3	3.13411e-07	5.84471e-05	-1.03052	0.201462	5.87517	0.29979	0.00287435	0.0580058	0.0402342	0.0580058
KLHDC8B	ENST00000462582.1	3.40119e-07	6.28903e-05	-1.30844	0.25657	5.68259	0.424829	0.0342121	0.0645302	0.0449094	0.0645302
CTCF	ENST00000644753.1	3.42466e-07	6.3146e-05	-6.48822	1.27259	2.67626	9.62911	1.87682	0.394165	0.552407	0.552407
VDAC3	ENST00000521158.5	3.50626e-07	6.4121e-05	-1.18029	0.231704	5.78576	0.562906	0.033517	0.0470129	0.0422736	0.0470129
FABP3	ENST00000373713.6	3.5907e-07	6.54698e-05	-0.930234	0.182776	8.58766	0.229816	0.000244822	0.049866	0.0279165	0.049866
NDUFS2	ENST00000465923.5	3.82977e-07	6.84933e-05	-5.16411	1.01711	2.53879	6.40544	0.944866	-0.338341	0.606909	0.606909
NACA	ENST00000549259.5	3.82845e-07	6.84933e-05	-1.07226	0.211188	6.80227	0.258861	0.0389093	0.00828682	0.0279913	0.0279913
PALLD	ENST00000505667.6	3.95087e-07	7.01174e-05	-1.32221	0.260724	8.81851	0.464376	0.000515898	0.10145	0.0298614	0.10145
KRBA2	ENST00000643221.1	4.15972e-07	7.33915e-05	-1.32039	0.26087	5.2889	0.562699	0.0436339	0.0351384	0.058446	0.058446
PAIP1	ENST00000436644.6	4.17361e-07	7.34387e-05	-0.66961	0.132311	7.80922	0.118723	0.00136658	0.00643309	0.0248929	0.0248929
FAM241A	ENST00000309733.6	4.22316e-07	7.41114e-05	-1.06601	0.210732	6.6302	0.32659	0.00190557	0.0647063	0.029385	0.0647063
LAPTM5	ENST00000294507.4	4.49139e-07	7.75707e-05	-4.08177	0.808774	3.48928	4.05753	0.105043	0.876131	0.29463	0.876131
MICAL2	ENST00000256194.8	4.51469e-07	7.77337e-05	-0.989738	0.196148	7.08881	0.27309	0.00341294	0.0542982	0.0262787	0.0542982
SLC25A12	ENST00000263812.8	4.69153e-07	7.99722e-05	-0.750202	0.148893	6.79931	0.168395	0.0024678	0.0307861	0.0280129	0.0307861
LRRC49	ENST00000561131.2	4.88923e-07	8.26962e-05	-5.47622	1.08858	1.99709	6.96123	0.797457	0.980053	0.85885	0.980053
NEBL	ENST00000377122.8	5.22213e-07	8.74233e-05	-1.41494	0.281976	9.65201	0.545496	8.73031e-05	0.119178	0.0426002	0.119178
RBM20	ENST00000369519.4	5.1976e-07	8.74233e-05	-1.28721	0.256474	8.24153	0.473815	0.000289637	0.0983788	0.0259533	0.0983788
UGP2	ENST00000640075.1	5.24641e-07	8.76057e-05	-0.883179	0.176035	6.56241	0.203689	0.00317083	0.0433115	0.0300168	0.0433115
KCNH2	ENST00000532957.5	5.35147e-07	8.91327e-05	-1.08176	0.215779	6.76459	0.283863	0.027667	0.0421742	0.0282718	0.0421742
YBX1	ENST00000467957.1	5.4338e-07	9.02741e-05	-0.671586	0.13404	7.42643	0.13322	0.00181433	0.0172193	0.0251359	0.0251359
NAV1	ENST00000367296.8	5.83353e-07	9.56411e-05	-1.5017	0.300541	7.18744	0.609884	0.00988098	0.125606	0.0258512	0.125606
PNPO	ENST00000642017.1	5.84451e-07	9.56411e-05	-5.40457	1.08172	1.91052	6.68588	0.850167	0.7328	0.905005	0.905005
ASPH	ENST00000517856.5	6.07808e-07	9.89684e-05	-0.85386	0.171158	6.08	0.254758	0.00241783	0.0415248	0.036295	0.0415248
GUCY1A1	ENST00000296518.11	6.28452e-07	0.000101572	-0.811374	0.162852	7.84865	0.326467	0.0043808	0.0354006	0.02493	0.0354006
PPARGC1A	ENST00000264867.7	6.38656e-07	0.000102967	-1.03432	0.207731	6.84322	0.367623	0.00185445	0.0628738	0.0277016	0.0628738
TPM1	ENST00000560970.6	6.46955e-07	0.000103836	-2.10271	0.422515	7.2593	1.19765	0.0562062	0.211572	0.0255892	0.211572
GNAS	ENST00000477931.5	6.47223e-07	0.000103836	-1.28357	0.257923	7.8684	0.39474	0.0380061	0.0617804	0.024953	0.0617804
RASAL2	ENST00000462775.5	6.60049e-07	0.000105139	-0.651565	0.131027	7.49562	0.134998	0.000741306	0.00520075	0.0250107	0.0250107
C5orf24	ENST00000338051.4	6.60162e-07	0.000105139	-0.98638	0.198358	6.93634	0.268144	0.020358	0.0386606	0.0270998	0.0386606
MAP3K20	ENST00000338983.7	6.73395e-07	0.00010647	-0.935783	0.188329	8.85905	0.240519	0.000168764	0.0530327	0.0302617	0.0530327
ANKRD1	ENST00000371697.3	6.77683e-07	0.000106889	-1.39231	0.280276	10.0834	0.455035	5.05116e-05	0.117782	0.0542945	0.117782
HSPH1	ENST00000630972.2	6.86471e-07	0.000108015	-0.803519	0.161832	6.92157	0.181804	0.00724071	0.0320435	0.0271901	0.0320435
KTN1	ENST00000395309.7	7.11783e-07	0.000111462	-1.21473	0.244998	7.19486	0.504045	0.0591122	0.0309241	0.0258223	0.0309241
BUD31	ENST00000496696.5	7.87036e-07	0.00012179	-1.18425	0.239796	5.4146	0.296587	0.0328012	0.0120015	0.0534521	0.0534521
SLMAP	ENST00000494088.5	8.01234e-07	0.000123403	-1.18479	0.240075	5.51595	0.410167	0.0365475	0.0109642	0.0499066	0.0499066
AASS	ENST00000417368.7	8.09544e-07	0.00012439	-0.803126	0.162805	6.80105	0.20227	0.0022538	0.0375045	0.0280002	0.0375045
FRMD3	ENST00000328788.5	8.13701e-07	0.000124736	-1.29415	0.262395	5.85203	0.470229	0.00405745	0.0992196	0.0407417	0.0992196
RGPD6	ENST00000329516.7	8.43972e-07	0.000128774	-0.795062	0.161437	8.04166	0.193807	0.0104984	0.0285943	0.025282	0.0285943
GSE1	ENST00000412692.5	9.16202e-07	0.000138503	-1.09088	0.222228	7.10752	0.300672	0.0145668	0.0595112	0.0261915	0.0595112
ANK3	ENST00000280772.7	9.40635e-07	0.000141869	-0.91803	0.187213	5.91836	0.329754	0.00534688	0.0472262	0.0393234	0.0472262
CLIP4	ENST00000320081.10	9.9795e-07	0.000149139	-0.849339	0.173617	5.91121	0.179461	0.00574307	0.0295774	0.039471	0.039471
SYNE1	ENST00000460912.6	1.00758e-06	0.000150235	-5.29207	1.08219	3.45484	7.10284	1.45337	-0.267119	0.303331	0.303331
AKAP13	ENST00000558644.2	1.08513e-06	0.000159915	-1.34288	0.275431	4.84275	0.705723	0.0310617	0.0463249	0.0827321	0.0827321
PLCL1	ENST00000487695.6	1.08489e-06	0.000159915	-1.43727	0.294789	6.02986	0.537856	0.00661962	0.123731	0.037174	0.123731
UQCRB	ENST00000517603.5	1.08716e-06	0.000159915	-0.684227	0.140349	7.09297	0.13617	0.0011035	0.0284434	0.0262591	0.0284434
AAK1	ENST00000409085.9	1.10754e-06	0.000161822	-0.945524	0.194093	5.7065	0.320297	0.00879772	0.0477104	0.0442696	0.0477104
RAD23B	ENST00000416373.6	1.1262e-06	0.000163937	-1.89517	0.389295	5.73466	0.916863	0.0726779	0.154648	0.0435391	0.154648
NUDT4	ENST00000549992.5	1.13396e-06	0.000164581	-0.830988	0.170745	9.28135	0.194964	0.000121773	0.0436089	0.0356438	0.0436089
PPP1R12B	ENST00000491336.5	1.13984e-06	0.000165068	-2.02004	0.415149	6.85674	1.36568	0.00386159	0.254662	0.0276094	0.254662
EEA1	ENST00000322349.12	1.20561e-06	0.000171295	-0.653946	0.134703	7.11513	0.122779	0.00106064	0.0186971	0.0261569	0.0261569
SLC25A4	ENST00000281456.11	1.21684e-06	0.000172031	-0.761732	0.156965	7.23592	0.162724	0.00126016	0.0356969	0.0256699	0.0356969
NDUFA5	ENST00000378795.8	1.22664e-06	0.000173043	-0.760371	0.156736	6.41249	0.177593	0.00524445	0.0113862	0.0316048	0.0316048
COX20	ENST00000366528.3	1.24026e-06	0.000174588	-1.4405	0.297065	4.86685	0.493109	0.0512586	0.0713218	0.0811129	0.0811129
SKA2	ENST00000330137.12	1.2799e-06	0.000178632	-0.71571	0.147787	6.47349	0.15375	0.0018364	0.0295349	0.0309251	0.0309251
FBN2	ENST00000262464.9	1.40658e-06	0.000194385	-0.851127	0.176433	9.72088	0.277774	6.02452e-05	0.0466329	0.044177	0.0466329
MOB4	ENST00000323303.9	1.4999e-06	0.000206258	-0.641473	0.133328	7.22087	0.110043	0.000940189	0.00533551	0.0257242	0.0257242
ZNF736	ENST00000423484.3	1.51316e-06	0.000207646	-2.80327	0.582863	3.08364	2.02862	0.100099	0.0946175	0.409494	0.409494
FGF12	ENST00000440901.4	1.53402e-06	0.000209629	-2.11367	0.43973	4.43286	1.10222	0.0626403	0.227403	0.117293	0.227403
LNPEP	ENST00000231368.10	1.55499e-06	0.000211611	-0.67126	0.139728	7.82155	0.175789	0.000534451	0.0287516	0.0249032	0.0287516
ITSN2	ENST00000416160.1	1.57883e-06	0.000213083	-1.17159	0.244031	6.41654	0.417928	0.00179542	0.0875314	0.0315581	0.0875314
SMPX	ENST00000494525.1	1.63676e-06	0.000219544	-1.48684	0.310161	4.53906	0.520185	0.0374027	0.0505289	0.106897	0.106897
MASP1	ENST00000460839.5	1.69394e-06	0.000225366	-1.26974	0.265254	5.47708	0.420118	0.025777	0.0797627	0.0512182	0.0797627
GPR22	ENST00000304402.6	1.75639e-06	0.000231791	-2.59139	0.542176	3.15686	1.96964	0.0432449	0.397687	0.386737	0.397687
GPR22	ENST00000639742.2	1.75639e-06	0.000231791	-2.59139	0.542176	3.15686	1.96964	0.0432449	0.397687	0.386737	0.397687
MXRA7	ENST00000375036.6	1.77882e-06	0.000233356	-0.764536	0.160043	7.61194	0.183277	0.0042234	0.0341974	0.0248814	0.0341974
USP2	ENST00000455332.6	1.79244e-06	0.000234656	-0.886839	0.185705	6.0628	0.189179	0.0151388	0.032494	0.0365908	0.0365908
MEF2A	ENST00000557942.5	1.80212e-06	0.000235451	-1.17318	0.245721	8.3773	0.422666	0.00247091	0.0880973	0.0265969	0.0880973
CAPZA2	ENST00000361183.8	1.82509e-06	0.000237979	-0.662353	0.138803	6.88473	0.147158	0.00147585	0.011985	0.0274237	0.0274237
LRRFIP1	ENST00000308482.14	1.9508e-06	0.000252359	-0.708455	0.148883	7.77915	0.150271	0.000553516	0.0326959	0.0248724	0.0326959
APLP2	ENST00000278756.7	2.02456e-06	0.000259847	-0.732009	0.154076	9.04418	0.124342	0.00327449	0.0208614	0.0323347	0.0323347
MYL4	ENST00000573747.6	2.09695e-06	0.00026861	-1.19104	0.25107	6.31233	0.434498	0.0163512	0.0782034	0.0328316	0.0782034
FGF5	ENST00000456523.3	2.12423e-06	0.000271045	-1.28148	0.270284	4.76905	0.488193	0.0216418	-0.0107969	0.0879384	0.0879384
XIRP1	ENST00000396251.1	2.23338e-06	0.000281677	-1.18721	0.250939	7.41327	0.537072	0.0101898	0.0842661	0.0251638	0.0842661
TNNC1	ENST00000496590.1	2.34311e-06	0.000293817	-1.16564	0.246889	4.90759	0.274342	0.012967	0.00979465	0.0784639	0.0784639
PAM	ENST00000455264.6	2.40799e-06	0.000300801	-1.03949	0.220427	7.83683	0.280078	0.00818759	0.0646948	0.0249177	0.0646948
JAZF1	ENST00000283928.10	2.52018e-06	0.000311688	-0.699787	0.148685	6.53285	0.171689	0.00285273	0.0188636	0.0303083	0.0303083
CORIN	ENST00000273857.9	2.55944e-06	0.000314912	-1.68729	0.358744	6.67371	0.811412	0.00578969	0.187256	0.029005	0.187256
MT-ND4L	ENST00000361335.1	2.62831e-06	0.000321572	-0.885458	0.188479	9.57174	0.190377	7.05229e-05	0.053216	0.0408832	0.053216
TRPC1	ENST00000612385.1	2.70536e-06	0.000329766	-5.7788	1.23163	2.1238	7.59817	1.48111	0.285384	0.794245	0.794245
GAB1	ENST00000505913.5	2.81258e-06	0.000339673	-1.13018	0.241282	6.22838	0.464735	0.0533495	0.0172039	0.0339762	0.0339762
RHEB	ENST00000472642.5	3.02982e-06	0.000362904	-0.707162	0.151466	6.57407	0.14616	0.00450835	0.0237017	0.0299045	0.0299045
SLCO3A1	ENST00000318445.11	3.221e-06	0.00038126	-1.18033	0.253497	6.12763	0.348479	0.00518825	0.0912031	0.0355064	0.0912031
UBE2Q2	ENST00000569423.5	3.24486e-06	0.000383391	-0.937975	0.201512	6.07174	0.215277	0.0172873	0.0436234	0.0364362	0.0436234
ZNF441	ENST00000357901.5	3.34134e-06	0.000391961	-1.48581	0.319623	4.34356	0.53614	0.0257794	0.10339	0.127459	0.127459
NDUFA1	ENST00000371437.5	3.47614e-06	0.000406318	-0.605952	0.13058	7.50558	0.0909539	0.000580985	0.0102269	0.0249957	0.0249957
FGF12	ENST00000445105.6	3.56444e-06	0.000415156	-2.40451	0.51874	5.50278	1.58851	0.0102734	0.393363	0.0503445	0.393363
NDUFAF3	ENST00000326912.8	3.67733e-06	0.000425277	-5.76864	1.24624	2.23215	7.99052	1.16447	1.1652	0.741723	1.1652
AC114801.3	ENST00000510231.1	3.68766e-06	0.00042572	-6.41853	1.38682	2.91026	10.9629	0.478318	2.40657	0.466969	2.40657
USP28	ENST00000003302.8	3.70471e-06	0.000426237	-0.864921	0.186917	7.70701	0.212575	0.00237982	0.0500272	0.0248507	0.0500272
ZNF717	ENST00000477374.5	3.71133e-06	0.000426237	-3.74515	0.809426	1.99477	3.16691	0.122693	0.109531	0.860063	0.860063
MXRA7	ENST00000449428.6	3.95371e-06	0.000447748	-0.624798	0.135419	8.36759	0.0829055	0.000962007	0.00682616	0.0265456	0.0265456
ALPK2	ENST00000361673.4	3.97163e-06	0.000448226	-0.936085	0.202929	9.36976	0.266331	0.000132247	0.0616382	0.0370891	0.0616382
IFRD1	ENST00000489994.5	4.07669e-06	0.000455372	-4.49336	0.975241	2.75448	4.73485	0.903791	0.228771	0.522851	0.522851
PALM2AKAP2	ENST00000482335.1	4.11187e-06	0.000457739	-0.864766	0.187762	5.72227	0.202013	0.00902438	0.0327494	0.0438575	0.0438575
DAAM1	ENST00000553307.5	4.13e-06	0.000458976	-4.99788	1.08538	3.49415	6.26612	1.4631	0.303976	0.293415	0.303976
LMO7	ENST00000526202.5	4.15757e-06	0.000461257	-0.607205	0.131905	7.93491	0.119031	0.00104632	0.0237696	0.0250522	0.0250522
IMPA1	ENST00000256108.10	4.32521e-06	0.00047423	-0.825892	0.179733	5.74382	0.176032	0.00514925	0.00378989	0.0433066	0.0433066
GALNT17	ENST00000618959.1	4.36067e-06	0.000476521	-5.76531	1.25513	2.05571	7.57433	1.53449	0.197621	0.828529	0.828529
STAU1	ENST00000371856.6	4.46022e-06	0.000484167	-0.664078	0.14472	7.16703	0.103865	0.0054828	0.00643686	0.0259332	0.0259332
SOD2	ENST00000546260.5	4.47167e-06	0.000484606	-0.725393	0.158101	7.91474	0.170609	0.000526082	0.0369678	0.0250186	0.0369678
CCNK	ENST00000555049.5	4.53022e-06	0.00049014	-5.2071	1.13557	1.74505	6.02035	0.936352	0.230274	0.997935	0.997935
HOMER1	ENST00000334082.10	4.55386e-06	0.000491075	-0.628189	0.137029	6.96935	0.125012	0.00126022	0.0155759	0.0269051	0.0269051
SBDS	ENST00000246868.7	4.56398e-06	0.000491356	-0.598534	0.130573	7.75103	0.110585	0.000714734	0.0235285	0.0248593	0.0248593
VWA8	ENST00000379310.8	4.73375e-06	0.000508601	-0.616662	0.134753	7.21465	0.122153	0.000846278	0.0263911	0.0257472	0.0263911
MASP1	ENST00000169293.10	4.94808e-06	0.000527723	-1.23392	0.270184	7.67527	0.411893	0.00134073	0.108158	0.0248535	0.108158
UPP1	ENST00000495446.1	5.0391e-06	0.000532867	-1.09012	0.238896	5.30729	0.288604	0.00562266	0.0799839	0.0576715	0.0799839
PALLD	ENST00000507699.1	5.2212e-06	0.000547698	-5.8085	1.275	2.66082	8.8892	1.18578	1.25264	0.558365	1.25264
PCBP2	ENST00000551104.5	5.2713e-06	0.000551188	-5.43277	1.19305	2.2222	5.8754	1.3886	-1.05223	0.746438	0.746438
COX7B	ENST00000475465.1	5.56437e-06	0.000576308	-0.952784	0.209758	5.6478	0.298784	0.00925269	0.0567449	0.0458731	0.0567449
TTN	ENST00000470257.1	5.6976e-06	0.000587769	-1.13962	0.251166	4.87289	0.329369	0.0122454	0.082381	0.0807133	0.082381
LAMA2	ENST00000421865.2	5.82052e-06	0.000597169	-1.34027	0.295681	7.99921	0.585695	0.00276186	0.128379	0.0251801	0.128379
GOLGA4	ENST00000437131.1	5.84096e-06	0.000598329	-1.09685	0.242021	7.01802	0.437669	0.0459876	0.0418735	0.0266353	0.0418735
PABPC1	ENST00000519004.5	6.0798e-06	0.000619884	-7.29573	1.61282	3.59569	14.2419	1.64447	2.2573	0.268441	2.2573
ATAD1	ENST00000328142.3	6.10092e-06	0.000620105	-0.614894	0.135952	6.98542	0.111166	0.000910877	0.00179561	0.0268137	0.0268137
ATAD1	ENST00000634773.1	6.10092e-06	0.000620105	-0.614894	0.135952	6.98542	0.111166	0.000910877	0.00179561	0.0268137	0.0268137
CFL2	ENST00000422678.2	6.16035e-06	0.000624208	-0.965334	0.213531	6.77878	0.276358	0.00370039	0.064693	0.0281646	0.064693
AMD1	ENST00000368885.8	6.2026e-06	0.000627517	-0.604873	0.13384	7.30065	0.0986741	0.00141298	0.0127335	0.0254569	0.0254569
CDH8	ENST00000299345.10	6.24926e-06	0.000631262	-1.5067	0.333504	4.42764	0.566084	0.0489897	0.0563466	0.117848	0.117848
CNOT11	ENST00000289382.8	6.52691e-06	0.000653259	-0.592333	0.13138	8.12861	0.0866214	0.0003562	0.0159811	0.0255347	0.0255347
MTND1P23	ENST00000416931.1	6.55214e-06	0.000654783	-1.55288	0.344493	4.13751	0.55873	0.0214799	0.120494	0.156533	0.156533
MSS51	ENST00000299432.7	6.57292e-06	0.000654861	-1.20583	0.267543	5.33811	0.39641	0.00858617	0.0987826	0.056408	0.0987826
PPP5C	ENST00000493347.5	6.56888e-06	0.000654861	-4.81222	1.06767	1.59187	5.20307	0.620104	0.464093	1.08979	1.08979
NOL7	ENST00000474485.1	6.61083e-06	0.000657637	-0.775315	0.172069	6.00731	0.141964	0.00682517	0.00660237	0.0375863	0.0375863
UNC45B	ENST00000268876.9	6.62868e-06	0.00065838	-1.40021	0.310793	7.13538	0.530885	0.0113616	0.133527	0.026067	0.133527
KAT2B	ENST00000263754.5	6.75676e-06	0.00066608	-0.76747	0.170503	6.15816	0.222455	0.00217816	0.0414288	0.0350235	0.0414288
ITGB2	ENST00000397850.6	6.856e-06	0.000673834	-4.25047	0.944947	2.10185	5.14964	0.534197	0.60712	0.805189	0.805189
SLMAP	ENST00000428312.5	7.30245e-06	0.000713427	-1.03617	0.231046	6.17617	0.315713	0.0227898	0.0572839	0.0347467	0.0572839
CDH8	ENST00000584337.5	7.34042e-06	0.000716069	-1.26065	0.281171	4.64725	0.441719	0.0211484	0.0546743	0.0974375	0.0974375
ANK2	ENST00000506722.5	7.67653e-06	0.000743318	-1.12012	0.250362	5.92301	0.523116	0.0547936	0.0362803	0.039228	0.039228
LRATD2	ENST00000517458.1	7.77193e-06	0.000750335	-1.48161	0.331354	4.52676	0.565896	0.0465245	0.118169	0.108038	0.118169
METTL5	ENST00000392640.6	7.79146e-06	0.000751113	-1.18548	0.265159	5.38736	0.322641	0.0509882	-0.00583997	0.0544761	0.0544761
TMEM67	ENST00000519845.5	7.83619e-06	0.000754314	-2.12307	0.475001	4.46627	1.18632	0.116951	0.221488	0.113858	0.221488
EIF1	ENST00000310837.8	7.92686e-06	0.000761921	-1.32569	0.296764	6.61529	0.474735	0.0559099	0.0761931	0.0295197	0.0761931
G3BP2	ENST00000507947.5	7.96964e-06	0.00076379	-3.82194	0.855787	2.14008	3.30132	0.312363	0.219668	0.786195	0.786195
H4C3	ENST00000377803.3	8.33525e-06	0.000793842	-3.08923	0.693215	2.61364	2.70757	0.144002	0.159777	0.576818	0.576818
NDUFB6	ENST00000379847.8	8.34385e-06	0.000793842	-0.72248	0.16213	6.11167	0.142628	0.00366366	0.0127559	0.0357658	0.0357658
TNNT2	ENST00000455702.5	8.54358e-06	0.000810098	-1.31434	0.295284	7.89284	0.523672	0.00312516	0.127664	0.0249856	0.127664
RPL10P7	ENST00000495649.1	8.55184e-06	0.000810098	-1.63591	0.367548	4.02238	0.582165	0.0263954	0.0730936	0.176242	0.176242
CCDC112	ENST00000395557.4	8.77895e-06	0.000829212	-5.39661	1.21402	2.02291	6.95474	1.36536	0.625848	0.845399	0.845399
COX7C	ENST00000511472.5	8.99271e-06	0.000846958	-0.925495	0.208441	6.00609	0.238476	0.00603988	0.0591317	0.0376088	0.0591317
AKAP6	ENST00000557354.5	9.13783e-06	0.000856926	-1.39605	0.314666	4.53634	0.553636	0.0374907	0.111031	0.107148	0.111031
TRDN	ENST00000546248.5	9.15908e-06	0.000857691	-1.3722	0.309324	6.66156	0.549247	0.00237638	0.141145	0.0291091	0.141145
LIMS2	ENST00000413578.5	9.46117e-06	0.000880938	-5.022	1.13386	2.3974	5.55511	1.2618	-1.16773	0.666647	0.666647
SLC8A1	ENST00000406785.6	9.64189e-06	0.000894932	-1.11411	0.251773	9.08449	0.392999	0.000141497	0.0949431	0.0328427	0.0949431
UBR3	ENST00000418381.5	9.65247e-06	0.000894932	-6.9274	1.56558	3.33306	13.1993	1.11604	2.56052	0.335644	2.56052
POPDC2	ENST00000463323.1	9.86602e-06	0.000911667	-1.19917	0.2713	4.82963	0.373122	0.0267745	0.0629966	0.083631	0.083631
LEMD2	ENST00000506578.5	1.00431e-05	0.000925903	-5.11144	1.15742	2.7466	6.74326	1.48364	-1.36876	0.525783	0.525783
NOTCH2NLC	ENST00000578189.1	1.01013e-05	0.000929961	-0.695003	0.157419	6.26728	0.197001	0.00373917	-3.73225e-05	0.0334319	0.0334319
NA	ENST00000640289.1	1.02352e-05	0.000940053	-0.801253	0.181602	6.28535	0.188274	0.0133185	0.0361503	0.0331873	0.0361503
TBL1XR1	ENST00000631253.2	1.03031e-05	0.000943228	-0.908951	0.206078	6.23323	0.299306	0.0297952	0.0094356	0.033907	0.033907
ENO3	ENST00000323997.10	1.03919e-05	0.000948642	-0.819626	0.185904	8.04074	0.168171	0.00383288	0.0480078	0.0252796	0.0480078
MT-ND2	ENST00000361453.3	1.04796e-05	0.000954052	-1.21743	0.276248	11.1844	0.336133	1.60401e-05	0.0720236	0.114453	0.114453
PGM5	ENST00000396396.6	1.05956e-05	0.000959276	-0.89998	0.204325	7.21366	0.229527	0.00098068	0.0616424	0.0257509	0.0616424
ATP5PB	ENST00000369721.8	1.05882e-05	0.000959276	-0.588013	0.133494	7.66817	0.0842585	0.00187577	0.0112144	0.0248551	0.0248551
ATP5MF	ENST00000394186.3	1.07721e-05	0.000973911	-0.633578	0.14396	6.63256	0.112147	0.00172288	0.0279858	0.0293639	0.0293639
SORBS2	ENST00000437304.6	1.12996e-05	0.00101738	-1.05889	0.241167	8.41368	0.326384	0.00089165	0.0863504	0.0267964	0.0863504
SFPQ	ENST00000470472.5	1.18193e-05	0.00105419	-0.622192	0.142024	6.82186	0.0976392	0.00240545	0.0157864	0.0278508	0.0278508
RC3H1	ENST00000258349.8	1.19408e-05	0.00106325	-5.60242	1.27948	3.53434	7.8114	2.17214	-0.948878	0.283465	0.283465
CCAR1	ENST00000540210.5	1.19714e-05	0.00106325	-0.91864	0.209826	6.21794	0.227117	0.0319138	0.0169599	0.0341266	0.0341266
ANAPC16	ENST00000621663.4	1.2128e-05	0.00107424	-0.654427	0.149574	6.81375	0.110614	0.00248606	0.0310725	0.0279086	0.0310725
PPP2CA	ENST00000522385.1	1.23213e-05	0.00108549	-0.73812	0.168836	6.01134	0.124893	0.00524651	0.00595264	0.0375118	0.0375118
SYNM	ENST00000336292.10	1.26392e-05	0.00110605	-0.795117	0.182105	6.91421	0.25192	0.00380352	0.0459398	0.0272358	0.0459398
PCMT1	ENST00000649295.1	1.29456e-05	0.00112834	-0.647768	0.148536	6.64804	0.128512	0.00386752	0.0229367	0.0292269	0.0292269
PAM	ENST00000348126.6	1.35916e-05	0.00117836	-0.603773	0.138787	8.60436	0.110453	0.00085362	0.0169102	0.0280391	0.0280391
PDLIM5	ENST00000615540.4	1.3631e-05	0.00118021	-1.52218	0.349948	8.98889	0.657148	0.00357788	0.180117	0.0316719	0.180117
PHC1	ENST00000433083.6	1.45943e-05	0.00124876	-1.17022	0.269964	5.88307	0.308871	0.0692569	-0.00171948	0.0400644	0.0400644
MOCS2	ENST00000450852.7	1.48419e-05	0.00126275	-0.594579	0.137284	6.93676	0.106819	0.001173	0.0192913	0.0270973	0.0270973
RIT1	ENST00000368323.8	1.49934e-05	0.00127209	-0.615873	0.142274	6.86836	0.106015	0.00283146	0.00495168	0.0275314	0.0275314
TRDN	ENST00000361029.8	1.50224e-05	0.00127209	-1.49153	0.344595	4.68451	0.604879	0.0150724	0.163046	0.094408	0.163046
ACTN2	ENST00000366578.6	1.55185e-05	0.00130565	-1.25087	0.289473	8.93172	0.440399	0.000459888	0.125232	0.0310263	0.125232
USP53	ENST00000509769.5	1.55471e-05	0.00130638	-0.690433	0.159793	6.52352	0.155528	0.00789831	0.00626099	0.0304024	0.0304024
ATP13A3	ENST00000642744.1	1.57851e-05	0.00132298	-0.798318	0.184906	7.89588	0.187894	0.0113559	0.0399292	0.0249899	0.0399292
AC245297.1	ENST00000313342.8	1.58475e-05	0.00132481	-0.934728	0.216544	5.95856	0.341814	0.00399204	0.0663451	0.0385158	0.0663451
FBXO9	ENST00000370939.7	1.59532e-05	0.00133195	-0.606636	0.140584	6.83818	0.0920659	0.0019096	0.0128717	0.0277364	0.0277364
TTN	ENST00000589042.5	1.61709e-05	0.0013484	-1.6471	0.381971	7.0061	1.06306	0.0206591	0.198193	0.0266994	0.198193
SLMAP	ENST00000449503.6	1.66225e-05	0.00137555	-1.23901	0.28774	5.75477	0.42278	0.0604993	0.0636919	0.0430319	0.0636919
TNNI1	ENST00000555948.5	1.70087e-05	0.00140143	-1.27491	0.296428	7.30785	0.451175	0.00517623	0.126628	0.0254352	0.126628
CASQ1	ENST00000368078.8	1.72565e-05	0.00141696	-1.13455	0.263989	6.02419	0.336316	0.00269405	0.101841	0.0372765	0.101841
SC5D	ENST00000392789.2	1.74607e-05	0.00142586	-0.640579	0.149141	6.83056	0.150355	0.00166017	0.0317046	0.0277895	0.0317046
MYOZ2	ENST00000307128.5	1.74701e-05	0.00142586	-1.34973	0.314257	8.26975	0.518854	0.000285652	0.14785	0.0260743	0.14785
AKAP6	ENST00000557272.1	1.8031e-05	0.00145891	-1.06535	0.248451	6.13996	0.429321	0.00792151	0.0846701	0.0353094	0.0846701
DAAM1	ENST00000395125.1	1.83042e-05	0.001476	-0.605664	0.141357	7.76196	0.129889	0.00102492	0.0289479	0.0248637	0.0289479
THOC7	ENST00000295899.10	1.8355e-05	0.001476	-0.63116	0.147329	6.49245	0.0985172	0.00183532	0.0187665	0.0307234	0.0307234
PAM	ENST00000304400.11	1.8321e-05	0.001476	-0.67893	0.158465	8.99448	0.165512	0.00103497	0.0366316	0.0317372	0.0366316
C1QBP	ENST00000574444.5	1.93717e-05	0.00153699	-0.811254	0.1899	6.94315	0.173159	0.0052318	0.048861	0.0270589	0.048861
CSRP3	ENST00000649842.1	1.94199e-05	0.00153894	-1.682	0.393777	6.39184	0.731294	0.00916611	0.223425	0.0318461	0.223425
NDUFB1	ENST00000605997.5	1.95979e-05	0.00154456	-0.722277	0.169174	6.60716	0.142084	0.0015349	0.041395	0.0295942	0.041395
UBE2D3	ENST00000394803.9	1.95842e-05	0.00154456	-0.698085	0.163502	6.93341	0.123484	0.00893064	0.0311688	0.0271176	0.0311688
NDUFAF4	ENST00000316149.8	1.95566e-05	0.00154456	-0.861731	0.201816	5.39564	0.208319	0.0069329	0.0292904	0.0541614	0.0541614
FLNC	ENST00000346177.6	1.97081e-05	0.00155052	-0.936439	0.2194	9.60931	0.262011	0.00134021	0.0708647	0.0416711	0.0708647
HSPG2	ENST00000453796.1	1.98354e-05	0.00155679	-5.0286	1.17856	1.8095	6.06152	1.12252	0.63739	0.960988	0.960988
GPR183	ENST00000376414.5	2.01322e-05	0.00157249	-1.98532	0.465665	4.26945	1.00946	0.0203256	0.30494	0.137001	0.30494
DCAF6	ENST00000367843.7	2.03214e-05	0.00158355	-0.639955	0.150177	7.27361	0.135512	0.00592247	0.0279074	0.0255419	0.0279074
MPC1	ENST00000360961.11	2.04641e-05	0.00159277	-0.662361	0.155492	6.29952	0.130469	0.00326772	0.0141161	0.032999	0.032999
REEP5	ENST00000379638.9	2.08144e-05	0.00161427	-0.646059	0.151801	7.80091	0.14274	0.000708633	0.0338565	0.0248865	0.0338565
FBXO3	ENST00000265651.8	2.09999e-05	0.00162673	-0.692918	0.162887	6.23446	0.144895	0.00590871	0.0305181	0.0338895	0.0338895
PRICKLE1	ENST00000345127.9	2.13689e-05	0.00164877	-0.588278	0.138416	7.49581	0.102878	0.00372787	0.0207321	0.0250104	0.0250104
CLIC5	ENST00000185206.12	2.13472e-05	0.00164877	-1.3152	0.309436	5.44067	0.649417	0.0328953	0.110731	0.0525006	0.110731
NIPSNAP2	ENST00000322090.8	2.13851e-05	0.00164877	-0.701975	0.165174	7.85639	0.161545	0.00055057	0.0403731	0.0249387	0.0403731
UBR3	ENST00000487689.1	2.26691e-05	0.00172541	-4.7085	1.11132	1.98879	4.49001	0.989362	-0.627609	0.863199	0.863199
TNNC1	ENST00000232975.7	2.30741e-05	0.00174638	-1.11912	0.26439	9.61556	0.328934	8.57005e-05	0.104767	0.0418047	0.104767
RAPGEF2	ENST00000644902.1	2.3078e-05	0.00174638	-0.880728	0.208071	7.36196	0.24306	0.00785042	0.05709	0.0252852	0.05709
LCK	ENST00000336890.10	2.36172e-05	0.001781	-4.08768	0.966898	2.14893	6.85241	0.294408	1.10793	0.781843	1.10793
POPDC2	ENST00000468916.1	2.38912e-05	0.00179752	-0.991161	0.234593	5.11165	0.225922	0.0157945	0.00878614	0.0667561	0.0667561
AP1S2	ENST00000452376.5	2.42617e-05	0.00182121	-1.79003	0.424021	4.32812	0.858251	0.140328	-0.042272	0.129363	0.129363
RETREG1	ENST00000399793.6	2.44247e-05	0.00182925	-1.86409	0.441722	4.96535	0.950423	0.0983958	0.194282	0.074894	0.194282
H2BC20P	ENST00000564237.2	2.45979e-05	0.00183802	-0.88791	0.210482	5.25584	0.225517	0.00657624	0.056959	0.0598778	0.0598778
DCAF6	ENST00000367840.3	2.46935e-05	0.00184284	-0.812331	0.192606	6.51632	0.344386	0.0141638	0.0414818	0.0304758	0.0414818
FASTKD1	ENST00000453153.7	2.49883e-05	0.00186081	-0.828164	0.196485	5.64346	0.274888	0.0119131	0.0439091	0.0459961	0.0459961
TNNT2	ENST00000367318.9	2.504e-05	0.00186104	-1.22972	0.291787	9.40036	0.420881	0.00116194	0.126548	0.0376187	0.126548
DENND5B	ENST00000389082.10	2.52645e-05	0.00187499	-0.946967	0.224803	8.77088	0.329829	0.000237359	0.0755675	0.0294144	0.0755675
MDH1	ENST00000233114.13	2.54721e-05	0.00188612	-0.726888	0.172634	9.15117	0.165231	0.000120038	0.0445837	0.0337304	0.0445837
FASTKD2	ENST00000402774.8	2.59068e-05	0.00191614	-0.634956	0.150937	6.43364	0.115867	0.00280946	0.0182665	0.0313637	0.0313637
ATP5PF	ENST00000284971.7	2.6199e-05	0.0019299	-0.670463	0.159474	7.39682	0.132253	0.000994129	0.0371538	0.0252005	0.0371538
MSRB3	ENST00000642404.1	2.66538e-05	0.00195154	-6.1016	1.45265	2.56432	9.37044	2.07549	1.08981	0.59653	1.08981
VDAC1	ENST00000395044.7	2.72611e-05	0.00198933	-0.592237	0.14117	7.84536	0.0885414	0.00496685	0.0174823	0.0249265	0.0249265
COX7B	ENST00000647835.1	2.73926e-05	0.00199448	-0.810096	0.19315	6.90598	0.210601	0.00291771	0.0530428	0.0272874	0.0530428
CSDE1	ENST00000369530.5	2.76644e-05	0.00201203	-0.852895	0.203463	8.40789	0.279196	0.00195381	0.0601421	0.0267638	0.0601421
TRAC	ENST00000611116.2	2.80313e-05	0.00203194	-3.2652	0.779488	3.53463	4.57343	0.0941182	0.817284	0.283395	0.817284
TXLNB	ENST00000358430.8	2.85447e-05	0.00206251	-1.30492	0.311826	5.95758	0.606736	0.00295148	0.142902	0.038535	0.142902
DRAP1	ENST00000534333.1	2.894e-05	0.00208168	-5.19533	1.24241	1.92846	6.50954	1.42008	0.509724	0.895303	0.895303
XPNPEP3	ENST00000357137.9	2.91957e-05	0.00209777	-0.58565	0.140119	6.80448	0.108962	0.00147481	0.0132355	0.0279753	0.0279753
PYROXD1	ENST00000240651.14	2.95444e-05	0.00211164	-0.843079	0.201841	5.54557	0.216006	0.0121642	0.040056	0.0489454	0.0489454
MAP4	ENST00000426837.6	3.00627e-05	0.0021366	-1.35996	0.325895	7.21936	0.686921	0.00306588	0.156245	0.0257298	0.156245
CCAR1	ENST00000543706.1	3.03817e-05	0.00215227	-4.67773	1.1216	1.61358	5.11608	0.810565	0.537488	1.07641	1.07641
SORT1	ENST00000538502.5	3.06039e-05	0.00216566	-0.605136	0.145154	7.67974	0.0968059	0.00675184	0.0164046	0.0248526	0.0248526
SH3BGR	ENST00000333634.8	3.10099e-05	0.00218495	-1.15686	0.277695	7.03182	0.363753	0.00243236	0.11324	0.0265624	0.11324
CAP2	ENST00000378990.6	3.18293e-05	0.0022273	-0.76508	0.183915	7.61583	0.18451	0.00185246	0.0488845	0.0248788	0.0488845
TEKT4P2	ENST00000416067.5	3.26691e-05	0.00227492	-3.53756	0.8516	1.79802	3.65673	0.120335	0.0611738	0.967498	0.967498
CHIC1	ENST00000373504.10	3.30135e-05	0.00229158	-0.66496	0.160169	6.11484	0.158196	0.00276726	0.0199185	0.0357139	0.0357139
USP16	ENST00000399975.7	3.40621e-05	0.00234942	-0.952483	0.229821	5.94139	0.253529	0.0403703	0.0267459	0.0388562	0.0388562
MLIP	ENST00000370877.6	3.44545e-05	0.002369	-3.65648	0.882816	2.14792	3.25967	0.386711	0.602173	0.782336	0.782336
PPARA	ENST00000624793.1	3.45514e-05	0.00237317	-0.68449	0.165288	5.98243	0.166478	0.00292625	0.0362046	0.0380541	0.0380541
FBXL17	ENST00000619412.4	3.54014e-05	0.00241634	-0.793187	0.191795	6.04907	0.268902	0.0183466	0.0234119	0.0368311	0.0368311
CAP2	ENST00000229922.7	3.5375e-05	0.00241634	-0.88435	0.213829	7.73254	0.302144	0.00148778	0.0670965	0.0248539	0.0670965
DUS1L	ENST00000354321.11	3.81783e-05	0.00256049	-4.58682	1.11378	2.29393	5.27949	1.14782	-0.811772	0.712948	0.712948
PPP1R14C	ENST00000361131.5	3.93586e-05	0.00263156	-1.31422	0.319668	7.59564	0.472496	0.000654972	0.152627	0.0248934	0.152627
FHOD3	ENST00000585579.2	3.97216e-05	0.0026493	-4.74206	1.15404	4.06096	5.72707	1.26946	0.728256	0.169363	0.728256
RYR2	ENST00000609119.1	4.10901e-05	0.0027168	-1.56876	0.382506	6.36529	0.715101	0.0116732	0.207793	0.0321652	0.207793
XIRP1	ENST00000340369.4	4.10138e-05	0.0027168	-1.21576	0.296404	8.52864	0.438369	0.00141258	0.13037	0.027505	0.13037
KIF26B	ENST00000366518.4	4.13782e-05	0.00273309	-7.66493	1.86966	3.0489	14.9668	0.553377	4.69004	0.420607	4.69004
MYL7	ENST00000446581.5	4.29815e-05	0.00281908	-0.941303	0.2301	8.16623	0.233219	0.00044368	0.0789754	0.0256627	0.0789754
TACC2	ENST00000369004.7	4.44415e-05	0.00289454	-1.09346	0.267802	5.489	0.444699	0.0493846	0.0581922	0.0508098	0.0581922
H2BC21	ENST00000369155.3	4.54363e-05	0.00293017	-0.977379	0.239675	7.41132	0.277013	0.000599639	0.0855663	0.025168	0.0855663
SLMAP	ENST00000417128.5	4.60955e-05	0.00296101	-2.05568	0.504513	6.10299	1.18579	0.129016	0.252784	0.0359089	0.252784
AP1S2	ENST00000329235.6	4.62881e-05	0.00296756	-0.776669	0.190658	6.73133	0.208873	0.00200196	0.0525239	0.0285308	0.0525239
PPM1K	ENST00000608933.6	4.66608e-05	0.00298853	-0.768976	0.188856	7.27847	0.193541	0.00112207	0.052378	0.0255262	0.052378
C16orf87	ENST00000285697.9	4.76739e-05	0.00304151	-0.592931	0.1458	6.57671	0.107145	0.0020071	0.0168909	0.0298793	0.0298793
QKI	ENST00000361752.8	4.88851e-05	0.00308868	-0.894174	0.220191	7.662	0.307242	0.00132633	0.0714	0.0248569	0.0714
CDK17	ENST00000542666.5	4.95809e-05	0.00312059	-4.96943	1.22472	2.1518	6.20934	1.46948	0.578538	0.780434	0.780434
WEE1	ENST00000299613.10	4.99157e-05	0.0031298	-1.55712	0.383903	5.14282	0.90343	0.0704082	0.150664	0.065178	0.150664
CERS6	ENST00000392687.4	4.99184e-05	0.0031298	-0.719475	0.177385	7.83765	0.173745	0.00440614	0.042792	0.0249185	0.042792
SORBS2	ENST00000650145.1	5.00114e-05	0.00313263	-0.866628	0.213688	7.723	0.242138	0.00215069	0.0663432	0.0248522	0.0663432
RRAGD	ENST00000359203.3	5.02862e-05	0.00314083	-5.46467	1.34787	2.30285	9.60518	0.898645	1.8265	0.708864	1.8265
CCDC141	ENST00000343876.6	5.03368e-05	0.00314099	-1.08004	0.266409	6.86075	0.371112	0.00163633	0.104825	0.0275823	0.104825
ACADM	ENST00000420607.6	5.04299e-05	0.0031438	-0.64493	0.1591	6.41871	0.135496	0.0064357	0.0207679	0.0315333	0.0315333
ASNS	ENST00000437657.5	5.06161e-05	0.0031524	-4.1635	1.02732	1.90381	4.15258	0.674442	-0.267674	0.90865	0.90865
DISC1	ENST00000537876.5	5.23133e-05	0.00323655	-1.6495	0.407784	5.08954	0.801078	0.00962973	0.239801	0.0679071	0.239801
XIRP1	ENST00000421646.1	5.25505e-05	0.00324815	-1.5066	0.372554	7.33116	0.582518	0.005126	0.203068	0.0253678	0.203068
FABP3	ENST00000498148.5	5.27766e-05	0.00325599	-1.25832	0.311235	4.88131	0.405864	0.043319	0.101982	0.0801603	0.101982
SLC5A1	ENST00000543737.2	5.3872e-05	0.00331731	-2.2724	0.562731	5.95514	1.4377	0.00547919	0.469521	0.038583	0.469521
MYL7	ENST00000431289.1	5.47436e-05	0.00336465	-1.27246	0.315403	5.24845	0.417095	0.00781522	0.141403	0.060205	0.141403
GCNT2	ENST00000644492.1	5.52809e-05	0.00338813	-1.09184	0.270786	6.05245	0.365973	0.0210171	0.0889707	0.0367715	0.0889707
LDB3	ENST00000623007.3	5.55652e-05	0.00340237	-1.08189	0.268399	7.51718	0.329043	0.0012387	0.106818	0.0249791	0.106818
SEC11A	ENST00000560266.5	5.56588e-05	0.00340492	-1.63932	0.406729	4.93059	0.764623	0.0856105	0.162532	0.0770174	0.162532
SGMS1	ENST00000361781.7	5.57788e-05	0.00340907	-0.975124	0.241967	6.78285	0.28137	0.00215606	0.0856658	0.0281343	0.0856658
SRSF2	ENST00000586778.1	5.62825e-05	0.00343025	-4.39615	1.09143	1.4525	4.54111	0.608232	0.606801	1.1786	1.1786
ZNF283	ENST00000618787.5	5.69321e-05	0.00346661	-1.27745	0.317365	4.35709	0.350194	0.0252553	-0.000513292	0.125825	0.125825
KLRK1	ENST00000240618.11	5.80278e-05	0.00350125	-3.79917	0.944905	2.92849	4.09193	0.420555	0.918712	0.460689	0.918712
ATP5PB	ENST00000464154.1	5.80359e-05	0.00350125	-0.60158	0.149622	6.46528	0.109667	0.00256645	0.0307999	0.0310138	0.0310138
NME2	ENST00000513177.5	5.86903e-05	0.00353096	-0.672423	0.167352	7.22913	0.12791	0.00897543	0.0330347	0.0256942	0.0330347
JMJD1C	ENST00000639129.1	5.90448e-05	0.00354903	-0.679661	0.169213	7.50565	0.179193	0.00853651	0.0344131	0.0249956	0.0344131
UTP4	ENST00000314423.12	5.96298e-05	0.00356781	-0.728324	0.181434	6.75255	0.167095	0.00916293	0.0402144	0.0283644	0.0402144
BRWD1	ENST00000342449.7	5.98929e-05	0.00358028	-0.597994	0.149005	6.55897	0.12104	0.00325374	0.0239392	0.0300502	0.0300502
ZMYND11	ENST00000381607.8	6.02882e-05	0.00360062	-0.783267	0.195247	6.89112	0.164634	0.0213654	0.0358164	0.0273823	0.0358164
SMYD1	ENST00000419482.7	6.08955e-05	0.003621	-1.21127	0.302114	9.90569	0.416245	6.78443e-05	0.136842	0.0489268	0.136842
SYNPO2L	ENST00000372873.8	6.11548e-05	0.00362592	-1.3115	0.327196	9.1989	0.472611	0.000175178	0.160411	0.0344035	0.160411
TTN	ENST00000342992.10	6.19978e-05	0.00366262	-2.15618	0.538361	9.67171	1.84018	0.000726652	0.434022	0.043041	0.434022
TMTC1	ENST00000539277.6	6.30225e-05	0.00371311	-1.65133	0.412709	5.61687	0.878429	0.0101214	0.245371	0.0467636	0.245371
POLK	ENST00000506928.5	6.37105e-05	0.00374354	-5.14369	1.28636	1.86275	6.16274	1.5509	0.0509325	0.93119	0.93119
FPGT-TNNI3K	ENST00000370895.5	6.4032e-05	0.00375272	-1.44273	0.360913	4.55292	0.551169	0.0170007	0.178387	0.105628	0.178387
MAN1C1	ENST00000374332.8	6.48952e-05	0.00379272	-0.781536	0.195665	7.65781	0.193226	0.000995117	0.0564318	0.0248582	0.0564318
TMTC1	ENST00000551659.5	6.66472e-05	0.00386938	-1.25571	0.314877	4.83172	0.588835	0.0609402	0.0877809	0.0834867	0.0877809
ADAM23	ENST00000264377.8	6.65911e-05	0.00386938	-1.13136	0.28368	6.66036	0.405439	0.0025715	0.11814	0.0291195	0.11814
ATP5F1C	ENST00000335698.4	6.71182e-05	0.00388449	-0.672244	0.16864	7.78126	0.2054	0.00224438	0.0404146	0.0248736	0.0404146
SMIM30	ENST00000397764.8	6.72397e-05	0.00388808	-0.659838	0.165545	6.82688	0.130968	0.0025745	0.0385333	0.0278153	0.0385333
HOMER1	ENST00000535690.1	6.78666e-05	0.00391396	-0.9239	0.231923	5.05989	0.239703	0.0111886	0.0240388	0.069494	0.069494
PICALM	ENST00000530692.5	6.83088e-05	0.00393198	-0.765048	0.192122	5.67271	0.173647	0.0101871	0.0290786	0.0451791	0.0451791
LRRC49	ENST00000544974.6	6.86333e-05	0.00393736	-1.21943	0.306314	4.46587	0.540915	0.0205313	0.120211	0.113897	0.120211
MACF1	ENST00000469490.1	6.86208e-05	0.00393736	-0.756841	0.190112	5.73035	0.189776	0.0105649	0.0159973	0.0436492	0.0436492
SRSF3	ENST00000614136.1	6.91802e-05	0.00396179	-1.52479	0.383202	4.52986	0.695351	0.112517	0.0254379	0.107749	0.107749
TRAK1	ENST00000449246.5	6.98924e-05	0.00399908	-1.18946	0.299111	6.27038	0.389349	0.00341649	0.130784	0.0333896	0.130784
UBE2Q2	ENST00000561851.5	7.12705e-05	0.00406332	-1.17641	0.296175	5.23476	0.29716	0.0707609	-0.0623803	0.0608182	0.0608182
CHD8	ENST00000553870.2	7.16337e-05	0.00407378	-4.3574	1.09736	2.17896	5.14402	1.03912	-0.3696	0.767192	0.767192
AC022916.3	ENST00000592961.1	7.17657e-05	0.00407775	-1.83776	0.462872	3.68048	0.908869	0.0511512	0.270224	0.248169	0.270224
PCM1	ENST00000522275.5	7.19856e-05	0.0040867	-0.744932	0.187658	6.4254	0.151122	0.00769288	0.0451304	0.0314569	0.0451304
IFT74	ENST00000380062.9	7.21607e-05	0.00409309	-0.675865	0.170284	5.95768	0.10602	0.00496173	0.0138732	0.0385332	0.0385332
TTN	ENST00000460472.6	7.26232e-05	0.00411219	-1.90014	0.478924	10.5093	1.32181	0.000128334	0.343924	0.0711388	0.343924
USP53	ENST00000450251.5	7.70364e-05	0.00431358	-0.881	0.222844	5.54471	0.225285	0.0255162	0.0102728	0.0489731	0.0489731
SRSF7	ENST00000443213.5	7.72082e-05	0.00431581	-0.635034	0.16065	6.2131	0.102072	0.00451581	0.030183	0.0341968	0.0341968
NDUFB5	ENST00000259037.8	7.82194e-05	0.00436117	-5.20482	1.31775	1.89264	7.01917	1.68994	0.895592	0.914744	0.914744
FILIP1	ENST00000237172.12	7.84825e-05	0.00436839	-0.661305	0.167462	7.87468	0.199706	0.00100054	0.0410647	0.0249609	0.0410647
EIF2A	ENST00000477551.5	7.98753e-05	0.0044346	-5.65164	1.43269	2.15963	8.29975	1.48527	1.59363	0.776601	1.59363
TOR1AIP1	ENST00000435319.8	8.10589e-05	0.0044965	-0.707176	0.179429	6.29529	0.132219	0.0118085	0.0364839	0.0330549	0.0364839
ZADH2	ENST00000322342.4	8.20098e-05	0.00453771	-0.603348	0.153194	6.35979	0.130485	0.00297032	0.0240998	0.0322324	0.0322324
UVRAG	ENST00000531818.5	8.23865e-05	0.00455086	-1.10226	0.27995	5.32218	0.260566	0.0605026	-0.0169427	0.0570558	0.0570558
CAPZA2	ENST00000449080.5	8.30103e-05	0.00458145	-0.623111	0.158329	6.26459	0.104596	0.00413347	0.0165544	0.0334687	0.0334687
LMO7	ENST00000321797.12	8.39874e-05	0.00460819	-1.41369	0.359467	6.06728	0.648199	0.157312	-0.143665	0.0365131	0.0365131
CYCS	ENST00000409764.5	8.63638e-05	0.00470309	-0.717723	0.182812	7.31497	0.193106	0.00272904	0.0474013	0.0254142	0.0474013
DMD	ENST00000357033.8	8.62258e-05	0.00470309	-1.24136	0.316157	7.97913	0.685196	0.0022926	0.147641	0.0251367	0.147641
STX17	ENST00000534052.1	8.70066e-05	0.00473415	-4.38436	1.11725	2.74813	4.56615	1.34717	-0.222991	0.525213	0.525213
ATP2B4	ENST00000484746.1	8.7382e-05	0.00474147	-8.02632	2.04586	3.53763	16.8933	0.746189	5.53214	0.282656	5.53214
RPS24	ENST00000645440.1	8.74541e-05	0.00474147	-1.09723	0.279692	7.87121	0.376302	0.00199388	0.115348	0.0249565	0.115348
WDR13	ENST00000376729.10	8.8653e-05	0.00478003	-0.617425	0.157518	6.23138	0.123689	0.00328451	0.0275396	0.0339333	0.0339333
SLC25A30	ENST00000519676.6	8.87921e-05	0.00478359	-0.708745	0.180833	5.87235	0.181716	0.00875529	0.0150604	0.0402955	0.0402955
CDK17	ENST00000261211.8	8.89657e-05	0.00478787	-0.60393	0.154108	6.3223	0.0971427	0.00292099	0.0211611	0.032703	0.032703
CAMK2D	ENST00000513132.5	8.96771e-05	0.00481147	-1.18952	0.303686	6.8432	0.435655	0.0055884	0.132749	0.0277017	0.132749
TRDN	ENST00000334268.9	8.98039e-05	0.00481433	-1.74665	0.445959	6.97356	0.874983	0.00167214	0.296647	0.026881	0.296647
CD48	ENST00000368046.8	9.07555e-05	0.00484946	-2.97269	0.759489	2.42443	2.8781	0.210317	0.404689	0.654919	0.654919
CORIN	ENST00000508498.5	9.19955e-05	0.0049037	-1.41959	0.362993	5.89786	0.634715	0.0664092	0.131236	0.0397501	0.131236
ITGB1BP2	ENST00000373829.8	9.24861e-05	0.00491784	-1.05132	0.268913	7.28979	0.306151	0.000872591	0.107599	0.0254903	0.107599
CISD1	ENST00000489785.5	9.40007e-05	0.00499027	-0.922505	0.236202	5.19566	0.259108	0.0207272	0.0629598	0.06262	0.0629598
PDHA1	ENST00000481733.1	9.4581e-05	0.00500484	-0.626976	0.160595	6.12784	0.124854	0.00318288	0.0343805	0.0355031	0.0355031
HCST	ENST00000246551.8	9.49299e-05	0.00501925	-3.19215	0.817829	2.6136	2.27222	0.426434	-0.228096	0.576833	0.576833
FUS	ENST00000568901.2	9.54551e-05	0.00503887	-1.65818	0.424972	4.52641	0.531021	0.162832	-0.145508	0.10807	0.10807
MYBPC3	ENST00000545968.5	9.57574e-05	0.00505076	-1.01747	0.260817	9.86472	0.304131	7.39903e-05	0.101964	0.0478048	0.101964
RAB2A	ENST00000530071.5	9.61206e-05	0.00506583	-0.825588	0.211679	5.85848	0.1914	0.0266134	0.00978642	0.0405988	0.0405988
CISD1	ENST00000488388.2	9.75813e-05	0.00512219	-3.1101	0.798172	2.65647	2.46715	0.395571	0.409752	0.560048	0.560048
NAT14	ENST00000592719.1	9.80702e-05	0.00513491	-3.75979	0.965207	2.72381	4.4118	0.863115	-0.0824778	0.534321	0.534321
QKI	ENST00000541696.1	0.000100845	0.00523059	-0.864921	0.222428	6.06805	0.224605	0.00804971	0.0661614	0.0364997	0.0661614
STAU2	ENST00000524300.6	0.00010189	0.00526812	-0.679026	0.174734	6.17638	0.130826	0.0110547	0.0297282	0.0347435	0.0347435
NUBPL	ENST00000547839.5	0.000102111	0.00527537	-4.62836	1.19118	1.8089	5.69227	0.678136	1.45024	0.961329	1.45024
DMAC1	ENST00000469050.1	0.00010424	0.00535998	-0.840994	0.216723	5.2664	0.18195	0.0110385	0.0501178	0.0594148	0.0594148
PDLIM5	ENST00000359265.8	0.000104538	0.00537106	-0.933819	0.240687	5.52065	0.250553	0.00477518	0.0821199	0.0497519	0.0821199
LMNA	ENST00000368297.5	0.000106689	0.00545161	-0.782859	0.202036	6.2912	0.154957	0.0281184	-0.00656592	0.0331092	0.0331092
ACTN2	ENST00000651786.1	0.000106612	0.00545161	-1.05673	0.272702	8.5029	0.320835	0.00137429	0.110175	0.0273358	0.110175
AGFG1	ENST00000409979.6	0.000106955	0.00546038	-0.925251	0.238821	5.37531	0.205528	0.0306144	0.0290518	0.0549388	0.0549388
CRYBG3	ENST00000389622.7	0.000107029	0.00546038	-0.815065	0.210389	7.15014	0.290436	0.000999348	0.0653961	0.0260036	0.0653961
MTATP6P1	ENST00000514057.1	0.000108197	0.00549865	-0.704772	0.182044	9.11365	0.130449	0.000120851	0.0495893	0.0332235	0.0495893
STAG2	ENST00000371160.5	0.000108422	0.00550581	-5.6058	1.44818	2.00756	7.19516	2.29246	-0.586652	0.853378	0.853378
ADPRHL1	ENST00000375418.7	0.000108882	0.00551204	-1.27926	0.330568	6.31919	0.465201	0.00345842	0.160454	0.032743	0.160454
EIF1AY	ENST00000382772.3	0.000109996	0.00554701	-0.722702	0.18687	5.77007	0.173603	0.00972637	0.0203903	0.042654	0.042654
FASTKD1	ENST00000453929.6	0.000113548	0.00567365	-0.684534	0.177356	5.91886	0.143668	0.00786982	0.0372814	0.039313	0.039313
MAPRE2	ENST00000589699.1	0.000114079	0.00569583	-5.35092	1.38678	2.15638	7.60027	1.59809	1.28666	0.778189	1.28666
MTRNR2L12	ENST00000600213.3	0.000115781	0.00575448	-1.13443	0.294284	11.3544	0.290552	1.22839e-05	0.013711	0.129892	0.129892
ARHGEF9	ENST00000253401.10	0.000116601	0.00578645	-0.782599	0.203106	7.42507	0.218922	0.00750938	0.0543684	0.0251387	0.0543684
GABRE	ENST00000370328.4	0.000118324	0.00585421	-4.22264	1.09691	2.82702	4.72814	0.350296	1.45453	0.496336	1.45453
EFHD1	ENST00000611312.1	0.000119328	0.00589052	-1.06185	0.275983	5.19484	0.299089	0.0507738	0.0634761	0.0626588	0.0634761
CDK16	ENST00000518022.5	0.000119618	0.0059004	-0.624001	0.162209	6.78559	0.0958424	0.0113536	0.0162356	0.0281138	0.0281138
CDH8	ENST00000577390.6	0.00012028	0.00592858	-1.46926	0.382066	4.05765	0.600272	0.0490194	0.10275	0.169943	0.169943
BZW2	ENST00000258761.8	0.000123241	0.00604169	-0.649708	0.169213	8.01703	0.134629	0.00390333	0.0390462	0.0252212	0.0390462
ZBTB43	ENST00000373464.5	0.000125429	0.00609971	-0.64173	0.167324	6.77669	0.166833	0.0138155	0.0265513	0.0281803	0.0281803
NELL2	ENST00000452445.6	0.000126316	0.00613371	-5.10892	1.33269	2.47848	6.06031	2.03219	-1.6195	0.631915	0.631915
DNAJC24	ENST00000465995.6	0.000126785	0.00614455	-0.614378	0.160302	6.08291	0.128056	0.00229961	0.0316776	0.0362456	0.0362456
AL354822.1	ENST00000612565.1	0.000128449	0.00621426	-2.96428	0.774081	2.42363	1.94823	0.243539	-0.114995	0.655264	0.655264
CTCF	ENST00000643892.1	0.000129234	0.00623114	-4.5388	1.18571	2.02975	4.77966	1.267	-0.66128	0.841864	0.841864
CYTIP	ENST00000264192.8	0.000129409	0.00623307	-3.94495	1.03066	2.00837	5.16101	0.180586	1.41281	0.852955	1.41281
RYR2	ENST00000366574.7	0.000133308	0.00638329	-1.47692	0.386601	8.63859	0.863399	0.000362634	0.223828	0.0282988	0.223828
SVIL	ENST00000464984.1	0.000133304	0.00638329	-1.37827	0.360777	4.1662	0.570482	0.0296993	0.165541	0.152007	0.165541
DLD	ENST00000415325.5	0.000133665	0.00639568	-0.724781	0.189753	6.74585	0.155397	0.0255928	-0.00621591	0.0284164	0.0284164
AHNAK2	ENST00000555122.1	0.000135894	0.00646404	-6.10019	1.59878	2.66984	10.0275	2.5944	1.23975	0.554881	1.23975
CACNA1C	ENST00000399655.5	0.00014015	0.00658629	-1.31483	0.345291	7.10991	0.559914	0.00101299	0.177826	0.0261806	0.177826
ECH1	ENST00000595470.1	0.000139887	0.00658629	-4.51151	1.18463	2.09921	5.42862	0.625246	1.47978	0.80651	1.47978
CHCHD10	ENST00000520222.1	0.000139707	0.00658629	-1.24449	0.326751	4.63033	0.443781	0.0258114	0.134338	0.0988509	0.134338
ECH1	ENST00000635118.1	0.000139887	0.00658629	-4.51151	1.18463	2.09921	5.42862	0.625246	1.47978	0.80651	1.47978
CACNA1C	ENST00000644235.1	0.00014015	0.00658629	-1.31483	0.345291	7.10991	0.559914	0.00101299	0.177826	0.0261806	0.177826
CHCHD10	ENST00000631145.1	0.000139707	0.00658629	-1.24449	0.326751	4.63033	0.443781	0.0258114	0.134338	0.0988509	0.134338
BEX3	ENST00000372634.1	0.000141426	0.00663607	-0.668202	0.175581	6.53077	0.130922	0.0159137	0.00564866	0.0303293	0.0303293
B2M	ENST00000559220.1	0.000142746	0.00667884	-6.67306	1.75452	3.86007	12.7996	2.21249	2.405	0.208092	2.405
KTN1	ENST00000554507.5	0.000148851	0.00691998	-0.984933	0.259673	6.61167	0.295762	0.022058	0.0790868	0.0295528	0.0790868
ADAP1	ENST00000478000.5	0.00015006	0.00696628	-2.18063	0.575218	4.07651	1.47826	0.149569	0.346744	0.166669	0.346744
MAT2A	ENST00000409017.1	0.000151431	0.00701999	-0.792041	0.209053	6.00816	0.1783	0.00559871	0.0599559	0.0375706	0.0599559
SORBS2	ENST00000451701.5	0.000151825	0.00703328	-1.0927	0.288459	5.84369	0.360338	0.00323269	0.12158	0.0409281	0.12158
CLIC5	ENST00000339561.11	0.000152265	0.00704866	-1.01062	0.266841	7.24524	0.355306	0.00156352	0.105243	0.0256372	0.105243
PCDH7	ENST00000511884.6	0.000152906	0.00706833	-0.720546	0.190303	7.98735	0.266133	0.000541241	0.0537818	0.0251541	0.0537818
RPS24	ENST00000464716.6	0.000155191	0.00715376	-1.19073	0.314791	6.61838	0.430251	0.012737	0.135903	0.0294916	0.135903
MEAF6	ENST00000487788.5	0.000158119	0.00726823	-5.02403	1.32983	1.8465	6.22184	1.71244	0.270846	0.940215	0.940215
MTUS2	ENST00000612955.5	0.000163005	0.00746662	-1.11643	0.296105	7.56304	0.364027	0.000776669	0.130741	0.0249234	0.130741
SLC20A2	ENST00000520262.6	0.000164012	0.00748349	-1.12105	0.297453	7.21242	0.449409	0.0165525	0.116165	0.0257555	0.116165
FTO	ENST00000636030.1	0.000165579	0.0075423	-4.16696	1.10633	2.30728	3.84204	1.12911	-0.628528	0.706847	0.706847
CHD1L	ENST00000652587.1	0.000165984	0.00755551	-4.84827	1.28743	2.53813	6.05667	1.87904	-1.63431	0.607179	0.607179
AC134878.2	ENST00000651211.1	0.000168541	0.00766124	-3.14313	0.835487	1.85562	2.50455	0.111917	0.233268	0.935141	0.935141
FHOD3	ENST00000590592.5	0.000169986	0.00771623	-1.00563	0.267463	8.49756	0.341866	0.000876879	0.106428	0.0273014	0.106428
TMEM163	ENST00000281924.6	0.00017022	0.00772065	-1.10988	0.295216	5.88145	0.341401	0.00292339	0.127805	0.040099	0.127805
TTN	ENST00000414766.5	0.000170975	0.00773963	-2.58881	0.6888	5.13119	2.34967	0.0479349	0.663734	0.0657606	0.663734
SLC25A4	ENST00000491736.1	0.000171821	0.00776184	-0.867056	0.230771	8.40663	0.221336	0.000274084	0.0796091	0.0267568	0.0796091
ZNF664	ENST00000392404.7	0.00017346	0.00779856	-0.915324	0.243772	7.20274	0.23787	0.058039	0.0310985	0.025792	0.0310985
FAM189A2	ENST00000645123.1	0.000173191	0.00779856	-1.85814	0.494815	4.2566	0.92832	0.0205768	0.346686	0.138761	0.346686
SLCO3A1	ENST00000424469.2	0.000177282	0.00792014	-1.04493	0.278695	6.18253	0.305875	0.00377928	0.112727	0.0346504	0.112727
HLA-DQA1	ENST00000497426.5	0.000177505	0.0079202	-0.603458	0.160963	6.46058	0.108304	0.00301543	0.0358482	0.0310649	0.0358482
B2M	ENST00000633512.1	0.000179988	0.00797123	-4.22073	1.12686	1.60405	5.57259	0.386578	1.51814	1.08227	1.51814
UBN1	ENST00000396658.8	0.000180716	0.00799264	-3.6662	0.979075	3.62005	3.67321	1.09781	0.340068	0.26255	0.340068
HSPE1-MOB4	ENST00000604458.1	0.000182897	0.00808366	-0.84625	0.226177	5.42224	0.206538	0.0226665	0.0540676	0.0531704	0.0540676
APBB1	ENST00000609331.5	0.000184215	0.00813091	-5.30215	1.41779	2.21643	7.68288	0.925636	2.08955	0.749184	2.08955
PRSS44P	ENST00000515154.2	0.000184923	0.00815119	-1.17301	0.313741	4.49708	0.480827	0.0147244	0.132926	0.110847	0.132926
NOTCH2	ENST00000602566.6	0.000185356	0.00816477	-1.14416	0.306075	4.6096	0.370073	0.0399068	0.0247276	0.100616	0.100616
HSPA9	ENST00000524109.1	0.000190131	0.00835405	-0.962471	0.257912	5.23656	0.191806	0.0390406	-0.0192703	0.0607372	0.0607372
NNT	ENST00000264663.9	0.000190565	0.00836606	-0.652537	0.174886	6.43884	0.159571	0.0060697	0.0398081	0.0313052	0.0398081
KLHL23	ENST00000392647.7	0.000192395	0.0084182	-0.60766	0.162964	6.77824	0.112091	0.0017557	0.0380802	0.0281687	0.0380802
COX20	ENST00000391839.6	0.000193187	0.00844201	-0.981321	0.263247	5.18141	0.282298	0.012207	0.0917412	0.0632957	0.0917412
RCSD1	ENST00000367854.8	0.00019382	0.00845227	-1.21105	0.324946	7.2867	0.445385	0.00176139	0.156624	0.0255	0.156624
SLC16A7	ENST00000547379.6	0.000195385	0.00850352	-0.907057	0.243511	6.17336	0.349063	0.0284775	0.0604691	0.0347896	0.0604691
MYL6	ENST00000550639.1	0.000195778	0.00851422	-1.03866	0.27888	7.58491	0.322199	0.00104178	0.115619	0.0249024	0.115619
CORIN	ENST00000503821.5	0.000196676	0.00852569	-1.44015	0.386799	4.55236	0.750629	0.0846815	0.139739	0.105679	0.139739
UBE2D3	ENST00000349311.12	0.000200626	0.0086666	-5.12535	1.37844	3.82611	7.26325	1.33314	1.517	0.215314	1.517
ENOX2	ENST00000610637.1	0.000200801	0.0086666	-0.768211	0.206619	5.49559	0.174711	0.0134508	0.0486866	0.0505863	0.0505863
PTPRM	ENST00000400060.8	0.000208306	0.0089245	-0.587488	0.158407	6.93222	0.118049	0.0103611	0.027278	0.0271249	0.027278
SIRPA	ENST00000356025.7	0.000211401	0.00900892	-0.630472	0.170168	7.93519	0.118197	0.00220233	0.0412336	0.0250527	0.0412336
LTBP1	ENST00000418533.6	0.000213451	0.00907853	-1.3947	0.376687	7.29408	0.813945	0.0394197	0.17342	0.025477	0.17342
ANAPC16	ENST00000470481.2	0.000214431	0.00910246	-0.800957	0.216394	5.62867	0.163821	0.0238196	0.000794914	0.04642	0.04642
KLHL3	ENST00000309755.9	0.000214378	0.00910246	-0.893384	0.241361	6.50346	0.251692	0.00358302	0.0837998	0.0306083	0.0837998
TNNT2	ENST00000494095.5	0.000216893	0.00918912	-1.48386	0.401207	5.91043	0.61823	0.00355265	0.237898	0.0394872	0.237898
CCDC141	ENST00000446116.5	0.000221438	0.00936348	-1.07805	0.291901	6.10777	0.477241	0.00358966	0.12422	0.0358299	0.12422
NRP1	ENST00000418675.5	0.000221733	0.00936965	-1.10111	0.298173	4.40027	0.286451	0.0125241	-0.00374628	0.120836	0.120836
ITK	ENST00000519402.5	0.000223258	0.00941612	-1.54805	0.419398	3.7559	0.912056	0.0330446	0.0962766	0.230797	0.230797
BNIP2	ENST00000439052.5	0.000228506	0.00952697	-1.0211	0.277081	4.73294	0.406376	0.0245261	0.0449589	0.0906347	0.0906347
PALM2AKAP2	ENST00000374530.7	0.000229281	0.00955319	-1.05589	0.286586	8.42677	0.394877	0.00341749	0.11978	0.026871	0.11978
HSPB7	ENST00000442459.2	0.000229514	0.00955682	-0.861158	0.23375	6.32047	0.203136	0.0128445	0.0691142	0.0327265	0.0691142
NEDD4	ENST00000508075.1	0.000230507	0.00959207	-0.592922	0.160989	6.13526	0.136174	0.00349211	0.0296156	0.0353841	0.0353841
MYL7	ENST00000457910.1	0.000232012	0.00963017	-1.11564	0.303054	6.07185	0.337681	0.0025248	0.135238	0.0364345	0.135238
SETD3	ENST00000329331.7	0.000232238	0.00963347	-4.54057	1.23349	1.93652	5.1976	1.39126	0.289378	0.890965	0.890965
SEC14L1	ENST00000443798.8	0.000234672	0.00971595	-4.40632	1.19788	3.80225	5.42099	1.63754	0.514834	0.220495	0.514834
ZNF302	ENST00000505365.2	0.00023984	0.00988614	-1.13733	0.309656	5.499	0.402288	0.0933587	0.0399293	0.0504715	0.0504715
MMAB	ENST00000545712.7	0.00024229	0.00995567	-0.690346	0.188091	5.99986	0.130238	0.00363904	0.0494283	0.0377249	0.0494283
SNX6	ENST00000362031.9	0.000243159	0.00995567	-0.764164	0.208256	6.07548	0.181505	0.0286834	-0.00980011	0.0363721	0.0363721
ARHGEF9	ENST00000636926.1	0.000242913	0.00995567	-1.59119	0.433611	4.2047	0.665309	0.13585	0.104677	0.146178	0.146178
RBM24	ENST00000510826.1	0.000244211	0.00997834	-1.33356	0.363541	4.20809	0.542556	0.0525661	0.123869	0.145678	0.145678
CACNA2D1	ENST00000356860.8	0.000245182	0.0099993	-0.836656	0.228143	6.37314	0.275606	0.00332783	0.0747462	0.0320697	0.0747462
DCAF5	ENST00000341516.9	0.000246439	0.0100318	-0.743077	0.202698	6.95671	0.182213	0.00517926	0.0564505	0.0269786	0.0564505
PRKAR1A	ENST00000588188.6	0.000246913	0.0100449	-1.08775	0.296758	5.84747	0.334942	0.0541407	0.0779569	0.0408433	0.0779569
GPC1	ENST00000455111.1	0.000250705	0.0101738	-0.788158	0.215253	5.7358	0.181862	0.0238011	0.0456998	0.04351	0.0456998
PDE4D	ENST00000546160.5	0.000252807	0.0102375	-0.94685	0.258745	6.58542	0.271587	0.0119391	0.088484	0.0297968	0.088484
TNNT2	ENST00000367322.6	0.000253146	0.0102411	-1.19606	0.326878	7.57506	0.418383	0.00911798	0.151156	0.0249115	0.151156
PICALM	ENST00000530542.1	0.000255591	0.0103209	-0.797701	0.218154	5.62055	0.173411	0.0224206	0.0489663	0.0466561	0.0489663
ENSA	ENST00000513281.5	0.0002603	0.0104787	-1.04553	0.286296	5.5369	0.373908	0.0737251	0.0257059	0.0492234	0.0492234
CCDC69	ENST00000355417.7	0.00026992	0.0107996	-0.639246	0.175493	8.00245	0.163357	0.00063635	0.0455602	0.0251874	0.0455602
PDE4DIP	ENST00000369356.8	0.000271284	0.0108409	-1.21425	0.333468	7.99277	0.551304	0.00252639	0.164275	0.0251658	0.164275
CCNH	ENST00000504115.1	0.000274361	0.0109372	-4.41509	1.21348	2.81087	4.98403	1.70662	-0.0872823	0.502165	0.502165
UBE3A	ENST00000630424.2	0.000277406	0.0110317	-1.38726	0.381585	5.72268	0.661487	0.174563	-0.10244	0.043847	0.043847
TNNT2	ENST00000367317.8	0.000277639	0.0110343	-1.29319	0.355729	7.33362	0.483817	0.0100881	0.179726	0.0253609	0.179726
MT-ND6	ENST00000361681.2	0.000283249	0.0112163	-0.76518	0.210784	10.4095	0.152558	2.94183e-05	0.0534257	0.0666156	0.0666156
PCCB	ENST00000469217.5	0.00028596	0.0113026	-1.34411	0.370514	4.97466	0.535615	0.115321	0.0906002	0.0743389	0.0906002
TNNT2	ENST00000509001.5	0.000289075	0.0113986	-1.16667	0.321849	7.27639	0.407715	0.00361087	0.15177	0.0255329	0.15177
TPM1	ENST00000559108.1	0.000289244	0.0113986	-1.14027	0.314578	4.93487	0.366373	0.0183575	0.130082	0.0767519	0.130082
CALD1	ENST00000443197.5	0.000289066	0.0113986	-0.735211	0.202822	7.26713	0.151645	0.00569772	0.0560075	0.0255631	0.0560075
MYL4	ENST00000570671.1	0.000293957	0.0115496	-0.931168	0.257188	4.98028	0.236992	0.010753	0.0884658	0.0740057	0.0884658
MACF1	ENST00000289893.8	0.000298079	0.0116834	-0.879554	0.243175	8.55372	0.594438	0.00121877	0.0874821	0.0276758	0.0874821
SCRN3	ENST00000272732.10	0.000301666	0.0117537	-0.654731	0.181172	5.78419	0.129259	0.00692346	0.0298118	0.0423114	0.0423114
RAB3IP	ENST00000550536.5	0.000306372	0.0119299	-0.958052	0.265399	7.14981	0.30417	0.00107518	0.10458	0.026005	0.10458
RYR2	ENST00000608590.5	0.000308918	0.0120076	-1.90304	0.527492	5.24587	1.04074	0.05876	0.358612	0.0603202	0.358612
PPP2R5C	ENST00000556260.6	0.000311261	0.0120844	-0.695659	0.192931	5.46983	0.144273	0.00436409	0.0375589	0.0514694	0.0514694
RNF111	ENST00000559209.5	0.000322367	0.0124198	-5.18921	1.4428	2.75714	6.8314	2.60064	-2.41616	0.521866	0.521866
GCNT2	ENST00000495262.6	0.000323598	0.0124525	-0.903486	0.251273	6.00563	0.274118	0.00573422	0.0889729	0.0376174	0.0889729
GCNT2	ENST00000644083.1	0.000323598	0.0124525	-0.903486	0.251273	6.00563	0.274118	0.00573422	0.0889729	0.0376174	0.0889729
PDHA1	ENST00000379804.1	0.000329393	0.0126384	-0.654572	0.182281	6.87251	0.146941	0.00155392	0.0482854	0.0275039	0.0482854
MED13L	ENST00000281928.8	0.000332093	0.0127196	-0.629894	0.175512	6.0095	0.159762	0.00812603	0.0380808	0.0375457	0.0380808
NAP1L1	ENST00000535020.6	0.000334408	0.0127709	-0.863975	0.240858	5.40032	0.155386	0.0330336	-0.0124662	0.053985	0.053985
IFT22	ENST00000422177.5	0.000335376	0.0128004	-4.28653	1.19524	1.589	4.85714	1.05134	0.773392	1.09157	1.09157
WEE1	ENST00000524549.1	0.000336892	0.0128284	-0.991811	0.276645	5.45209	0.286811	0.00523554	0.109563	0.0520927	0.109563
GLMN	ENST00000370360.8	0.000337656	0.01285	-0.700019	0.195288	5.462	0.132567	0.00546288	0.0256163	0.051743	0.051743
SCAF11	ENST00000465950.5	0.00034078	0.0129313	-1.31615	0.36742	4.55324	0.487151	0.0861295	0.116367	0.105599	0.116367
B2M	ENST00000623550.1	0.000341326	0.012937	-2.10348	0.587281	3.73361	1.11472	0.281492	0.0107811	0.235857	0.235857
ASB2	ENST00000556793.1	0.000343366	0.0129843	-3.60905	1.00807	1.98855	3.47662	0.660974	0.630939	0.863325	0.863325
ASB2	ENST00000628228.1	0.000343366	0.0129843	-3.60905	1.00807	1.98855	3.47662	0.660974	0.630939	0.863325	0.863325
AP1M1	ENST00000291439.7	0.000343642	0.0129872	-0.81718	0.228265	5.0694	0.220016	0.00917792	0.051085	0.0689793	0.0689793
CEBPG	ENST00000284000.9	0.000344186	0.0130002	-0.71024	0.198416	6.91564	0.154438	0.00593131	0.0531221	0.0272269	0.0531221
USP34	ENST00000453734.1	0.00034571	0.0130378	-0.979325	0.273677	5.11705	0.245339	0.0458697	0.0205361	0.066479	0.066479
RBM24	ENST00000509686.5	0.000350774	0.0131806	-1.16237	0.325176	6.551	0.449242	0.00679845	0.15181	0.0301281	0.15181
PRSS42P	ENST00000447340.1	0.000351641	0.0132056	-1.22258	0.342082	5.04811	0.460259	0.00792016	0.16761	0.0701381	0.16761
MITF	ENST00000394351.8	0.000352335	0.0132241	-5.19783	1.45458	2.67136	7.56999	2.23248	0.941215	0.554293	0.941215
ETFDH	ENST00000511912.5	0.000355187	0.0133082	-0.7249	0.202978	5.57923	0.145442	0.0139075	0.0198791	0.0478927	0.0478927
OSGEPL1	ENST00000522700.5	0.000357135	0.0133659	-3.87807	1.08633	1.30527	3.70248	0.492194	0.674002	1.27797	1.27797
CYP7B1	ENST00000310193.4	0.000358678	0.0134083	-0.879419	0.246422	4.93561	0.220447	0.00796435	0.083121	0.0767061	0.083121
PAM	ENST00000504691.1	0.0003613	0.0134986	-1.20892	0.338932	5.40075	0.501296	0.0332878	0.139024	0.0539686	0.139024
CCDC141	ENST00000443758.6	0.000365328	0.0136336	-0.903018	0.253376	6.32444	0.374068	0.00419824	0.092101	0.0326756	0.092101
B2M	ENST00000561424.5	0.000371282	0.0137438	-1.35753	0.381362	7.29418	0.601396	0.00114597	0.21701	0.0254767	0.21701
TLK1	ENST00000359766.7	0.000371346	0.0137438	-0.780827	0.219355	5.68183	0.189062	0.0272448	0.0127518	0.04493	0.04493
B2M	ENST00000631728.1	0.000371282	0.0137438	-1.35753	0.381362	7.29418	0.601396	0.00114597	0.21701	0.0254767	0.21701
NCKAP5	ENST00000409261.6	0.000372579	0.0137785	-2.89331	0.813006	3.72486	2.36589	0.60868	0.382789	0.237861	0.382789
TNNT2	ENST00000367320.6	0.000375302	0.0138431	-1.12428	0.316086	6.01631	0.40248	0.0117798	0.138086	0.0374204	0.138086
PLXNA4	ENST00000321063.8	0.0003832	0.0140837	-1.39199	0.391957	7.44237	0.73603	0.00394266	0.226503	0.0251038	0.226503
CUTC	ENST00000370476.10	0.000387512	0.0142182	-0.678855	0.191311	5.57103	0.155925	0.00675432	0.0294458	0.0481453	0.0481453
COX5A	ENST00000322347.11	0.000393922	0.0144131	-0.822086	0.231957	5.1772	0.186075	0.0172089	0.0573786	0.0634975	0.0634975
USP13	ENST00000263966.8	0.000395656	0.0144603	-0.901693	0.254502	7.54901	0.287948	0.000838454	0.0963187	0.0249388	0.0963187
NA	ENST00000652608.1	0.000409396	0.0147625	-4.91352	1.39037	4.21838	7.40524	1.86768	1.03203	0.144174	1.03203
LRRFIP2	ENST00000496479.5	0.00041	0.0147702	-1.52	0.43016	3.75101	0.606858	0.0456551	0.14964	0.231902	0.231902
EPB41L3	ENST00000542652.6	0.000410715	0.0147878	-0.78563	0.222363	7.17221	0.179203	0.00320784	0.0709599	0.0259121	0.0709599
FEM1C	ENST00000274457.5	0.000414765	0.0149008	-0.749494	0.212291	6.99849	0.171235	0.000928717	0.0666723	0.026741	0.0666723
SAMD12	ENST00000445741.6	0.000418269	0.0149903	-0.718502	0.203641	5.36986	0.198172	0.00705387	0.0506464	0.0551504	0.0551504
TPM2	ENST00000643485.1	0.000419549	0.015015	-0.793323	0.224899	6.65629	0.177759	0.00380629	0.0720627	0.0291549	0.0720627
CBWD2	ENST00000358604.7	0.000419988	0.015021	-0.966547	0.274027	5.65482	0.26863	0.0473749	0.0652614	0.0456755	0.0652614
SPSB4	ENST00000508126.1	0.000421588	0.0150459	-1.22632	0.347776	5.05859	0.495238	0.0853503	0.0960715	0.0695643	0.0960715
CORIN	ENST00000504584.1	0.000421792	0.0150459	-1.37912	0.391122	6.40758	0.5887	0.00630414	0.223161	0.0316617	0.223161
ATRX	ENST00000493470.2	0.000429017	0.0152372	-0.804862	0.228553	5.04559	0.178096	0.00807789	0.0215747	0.0702766	0.0702766
RCBTB1	ENST00000258646.3	0.000430726	0.0152477	-4.80655	1.3653	3.86528	6.5734	2.41258	0.38349	0.206999	0.38349
CORO6	ENST00000492276.6	0.00043066	0.0152477	-0.77261	0.219458	5.33399	0.179137	0.00773178	0.0645107	0.0565744	0.0645107
MYL12A	ENST00000580887.5	0.000432573	0.0152477	-0.631223	0.179357	7.06001	0.113029	0.00362372	0.0446297	0.0264187	0.0446297
MYL12A	ENST00000536605.1	0.000432573	0.0152477	-0.631223	0.179357	7.06001	0.113029	0.00362372	0.0446297	0.0264187	0.0446297
TBC1D8	ENST00000376840.8	0.000432108	0.0152477	-0.792025	0.225029	6.62226	0.193428	0.00882166	0.0671356	0.0294564	0.0671356
SYNE1	ENST00000367256.9	0.000432556	0.0152477	-0.675246	0.191865	6.82306	0.291721	0.027376	-0.00304428	0.0278423	0.0278423
MYL7	ENST00000431007.1	0.000432025	0.0152477	-1.08762	0.30901	5.50224	0.374745	0.00890296	0.134328	0.0503625	0.134328
TSC22D3	ENST00000372397.6	0.000435521	0.0153268	-0.769282	0.218697	6.67976	0.222559	0.00578417	0.0659584	0.0289537	0.0659584
MCC	ENST00000302475.8	0.000440171	0.0154738	-1.00519	0.285991	7.49309	0.398612	0.0046151	0.118072	0.0250147	0.118072
TAF5L	ENST00000366675.3	0.000442685	0.0155289	-0.859982	0.244783	4.87337	0.241317	0.00919664	0.0283046	0.0806817	0.0806817
SNRPN	ENST00000645002.1	0.000445185	0.0155748	-0.637047	0.181405	5.87802	0.118184	0.00918874	0.00996776	0.0401729	0.0401729
TMEM38B	ENST00000374692.8	0.000444956	0.0155748	-0.714141	0.20335	5.35527	0.160711	0.00630425	0.0193528	0.0557228	0.0557228
ATP5MC1	ENST00000393366.7	0.000450403	0.0157321	-0.738574	0.210501	5.54642	0.181707	0.0175478	0.0407143	0.0489184	0.0489184
ANK2	ENST00000510275.6	0.000455643	0.0158644	-1.60761	0.458589	4.88995	0.947576	0.179273	0.136183	0.0795975	0.136183
SLC8A1	ENST00000332839.8	0.000463233	0.0160603	-1.01664	0.290373	7.73222	0.476187	0.0186526	0.107822	0.0248539	0.107822
MICOS10	ENST00000498642.5	0.000463926	0.0160693	-0.624546	0.178403	5.74819	0.0957167	0.00454489	0.00604786	0.0431965	0.0431965
MAP3K7	ENST00000479630.1	0.000464714	0.0160776	-1.59336	0.455206	4.24571	0.717535	0.170544	0.139662	0.140275	0.140275
RUNX1T1	ENST00000265814.4	0.00046873	0.0161738	-6.00306	1.71613	2.93759	10.4736	1.99965	2.41801	0.457578	2.41801
CLIP1	ENST00000537123.2	0.000472575	0.0162737	-0.899011	0.257166	5.19402	0.29908	0.00551602	0.0936855	0.0626974	0.0936855
TPM1	ENST00000559281.6	0.000473167	0.016284	-4.99585	1.42922	5.35963	7.06017	1.30865	1.75536	0.0555509	1.75536
DIPK2A	ENST00000441925.2	0.000479439	0.0164307	-4.38832	1.25668	3.82027	5.76171	2.12201	0.246871	0.216575	0.246871
FGF12	ENST00000450716.5	0.000480275	0.0164421	-2.28423	0.654221	4.33044	1.48244	0.228784	0.413224	0.129075	0.413224
CPEB4	ENST00000522336.5	0.000481555	0.0164773	-1.21752	0.348778	4.80546	0.330668	0.0971517	-0.0366939	0.0853178	0.0853178
WEE1	ENST00000530175.5	0.000486008	0.016595	-0.827727	0.237283	5.7649	0.229982	0.0117156	0.0727394	0.0427809	0.0727394
SLC27A6	ENST00000395266.5	0.000488324	0.0166567	-4.62014	1.32493	1.68835	5.3354	1.60191	0.160233	1.03125	1.03125
TRIM63	ENST00000374272.3	0.000489122	0.0166692	-1.16452	0.333995	7.48606	0.429523	0.000670637	0.166658	0.0250259	0.166658
AKAP13	ENST00000394518.6	0.000492224	0.0167635	-0.788163	0.226162	8.43539	0.29552	0.000986371	0.0757374	0.026921	0.0757374
FASLG	ENST00000367721.3	0.000493561	0.0167672	-3.44766	0.989505	1.21581	2.5759	0.1275	0.232623	1.34118	1.34118
ZC3H12C	ENST00000278590.8	0.000494125	0.0167672	-0.706528	0.202797	6.21877	0.20738	0.00411448	0.0575753	0.0341145	0.0575753
PDE4D	ENST00000405755.6	0.000493289	0.0167672	-0.830055	0.238222	5.21443	0.311552	0.0184158	0.0667089	0.0617454	0.0667089
CLTRN	ENST00000650271.1	0.000492842	0.0167672	-3.5091	1.00703	1.414	2.73954	0.317115	-0.115811	1.20404	1.20404
RBPMS2	ENST00000560606.5	0.000498073	0.0168488	-5.54597	1.59285	4.21725	8.71456	1.89255	1.91321	0.144338	1.91321
HACD1	ENST00000498812.5	0.000501634	0.016943	-1.98577	0.570644	3.98501	1.44799	0.305288	-0.0469956	0.183165	0.183165
SNRPN	ENST00000553597.5	0.000502137	0.0169484	-0.636946	0.183051	5.72243	0.148873	0.00640795	0.0328534	0.0438535	0.0438535
TJAP1	ENST00000483640.5	0.000504607	0.0169733	-2.772	0.796941	2.47646	2.2177	0.303601	0.649071	0.632762	0.649071
SPHKAP	ENST00000344657.5	0.000505564	0.0169968	-1.6218	0.466329	7.071	0.899974	0.00600121	0.320194	0.0263645	0.320194
ARIH2	ENST00000452385.5	0.000508449	0.0170762	-0.968791	0.278687	5.02524	0.270537	0.0203695	0.0961304	0.0714119	0.0961304
BCAP29	ENST00000465919.5	0.000510521	0.0170975	-0.887308	0.255328	4.78025	0.209058	0.0106656	0.0394446	0.0871226	0.0871226
ST3GAL3	ENST00000642949.1	0.00051065	0.0170975	-4.41738	1.27115	1.71278	5.51467	1.40694	0.950947	1.0168	1.0168
NA	ENST00000639211.1	0.000510521	0.0170975	-0.887308	0.255328	4.78025	0.209058	0.0106656	0.0394446	0.0871226	0.0871226
CISD1	ENST00000333926.6	0.000511867	0.0171295	-0.649197	0.186848	5.59801	0.151247	0.00504506	0.0194284	0.0473232	0.0473232
DISC1	ENST00000602873.5	0.000512545	0.0171434	-3.31119	0.953103	2.57275	3.26641	0.281186	1.08142	0.593132	1.08142
ITPRID2	ENST00000440623.5	0.000513309	0.0171514	-0.748272	0.21541	6.04751	0.162526	0.0327436	0.0192126	0.0368586	0.0368586
NUP98	ENST00000397007.8	0.000514021	0.0171665	-0.733527	0.211188	6.06304	0.227323	0.00742629	0.059474	0.0365866	0.059474
ZFAND6	ENST00000559835.5	0.00052073	0.017311	-0.719798	0.207443	5.67044	0.135673	0.0193075	-0.00852567	0.0452414	0.0452414
TMSB4Y	ENST00000284856.4	0.000523175	0.0173835	-1.12651	0.324774	4.25514	0.313734	0.0192555	0.0800602	0.138962	0.138962
GOT1	ENST00000370508.7	0.000533614	0.0176497	-0.590609	0.170534	8.18035	0.130502	0.000321049	0.0433017	0.0257137	0.0433017
SNAP91	ENST00000520302.5	0.000551585	0.0181475	-3.89089	1.12637	3.84797	4.26601	0.221869	1.68119	0.210644	1.68119
CAP2	ENST00000465994.5	0.000558828	0.0182896	-0.942003	0.272977	6.49762	0.36387	0.0137828	0.0979921	0.0306692	0.0979921
MARCHF7	ENST00000478396.1	0.000559417	0.0182997	-0.637731	0.184819	5.65255	0.113398	0.00549827	0.0229127	0.0457391	0.0457391
MFN2	ENST00000412236.1	0.000561401	0.0183554	-1.44931	0.420138	4.32407	0.693433	0.0300293	0.234745	0.12987	0.234745
SH3PXD2A	ENST00000355946.6	0.000563757	0.0184049	-1.06669	0.309323	7.40735	0.321941	0.0746184	0.0689029	0.0251768	0.0689029
ARHGEF28	ENST00000426542.6	0.000567764	0.0184988	-4.86496	1.41154	2.14778	6.82515	1.82251	1.16615	0.782404	1.16615
BMP7	ENST00000395863.8	0.000572421	0.018632	-1.06872	0.31028	7.9786	0.343104	0.000595106	0.143816	0.0251356	0.143816
AJUBA	ENST00000397388.7	0.0005753	0.018702	-1.18049	0.342867	5.98663	0.344829	0.138362	-0.0277033	0.0379741	0.0379741
LMO7	ENST00000526528.1	0.000580078	0.0187878	-1.46786	0.426608	3.83267	0.841106	0.0590856	0.187119	0.213906	0.213906
RAPGEF1	ENST00000419442.1	0.000584938	0.0189358	-1.01106	0.294042	5.10908	0.362196	0.00632408	0.123367	0.0668887	0.123367
SCARB2	ENST00000639715.1	0.000586335	0.0189623	-6.4104	1.86465	3.53791	12.281	1.53509	3.68029	0.282585	3.68029
UBE2H	ENST00000649897.1	0.000587907	0.0190038	-5.32245	1.54852	2.08853	8.04188	2.04865	1.5482	0.81188	1.5482
EPRS1	ENST00000464052.5	0.000589243	0.0190361	-4.53851	1.32067	1.90533	6.84372	1.23824	1.37803	0.907825	1.37803
CACNB2	ENST00000324631.12	0.000591775	0.0190911	-1.30672	0.380373	5.16537	0.577179	0.0303152	0.186711	0.0640688	0.186711
DDX42	ENST00000577940.6	0.000602105	0.0193766	-4.28115	1.24791	1.45605	4.43176	1.15963	0.167116	1.17628	1.17628
INKA2	ENST00000357260.6	0.000602825	0.0193902	-1.05132	0.306476	7.17692	0.348137	0.00853473	0.132356	0.0258931	0.132356
CTNNA3	ENST00000433211.7	0.000605826	0.0194485	-1.24098	0.361907	7.60836	0.543013	0.000634936	0.19583	0.0248839	0.19583
ZC3H14	ENST00000302216.12	0.000606708	0.0194673	-0.647181	0.18876	5.83417	0.11913	0.0123023	-0.00656827	0.041143	0.041143
RPL8	ENST00000526668.5	0.000614057	0.0196646	-0.886802	0.258896	6.98767	0.252969	0.0737392	0.00508522	0.0268011	0.0268011
MYL7	ENST00000434895.5	0.000620372	0.0198086	-0.831978	0.243087	8.24327	0.205899	0.000553239	0.0880839	0.0259606	0.0880839
DDHD2	ENST00000520272.6	0.000620858	0.0198145	-1.05701	0.308856	6.28102	0.349513	0.109843	0.0219325	0.0332454	0.0332454
MLIP	ENST00000502396.6	0.000625847	0.0199445	-1.20997	0.353776	6.89253	0.494054	0.00504773	0.182688	0.0273732	0.182688
ZNF549	ENST00000602149.1	0.00063139	0.0200821	-0.958405	0.280419	4.55124	0.243764	0.0121715	0.0424468	0.105781	0.105781
CASZ1	ENST00000377022.8	0.000632785	0.0201167	-0.817797	0.239321	7.42205	0.201266	0.000947948	0.0849638	0.025145	0.0849638
PDE4DIP	ENST00000585156.5	0.000639011	0.0202752	-0.977287	0.286217	5.87641	0.32524	0.0502693	0.0726114	0.0402075	0.0726114
PTGES3L	ENST00000591916.5	0.000639683	0.0202769	-0.874092	0.256016	5.13237	0.228701	0.0150986	0.0832179	0.0657015	0.0832179
DKK3	ENST00000527132.1	0.000640955	0.0202975	-2.96288	0.867946	5.39576	1.95894	1.07584	-0.808332	0.054157	0.054157
PIK3R1	ENST00000521381.6	0.000646768	0.0204223	-0.709368	0.207952	7.72347	0.176363	0.000757342	0.0641089	0.0248522	0.0641089
UBA3	ENST00000415609.6	0.000651129	0.020498	-3.54415	1.03953	2.47045	3.62546	0.985645	0.630263	0.635294	0.635294
CYP1A1	ENST00000395048.6	0.000654594	0.0205604	-4.22197	1.23887	1.9764	5.06899	1.08027	1.22192	0.86973	1.22192
MYLK3	ENST00000394809.9	0.000659838	0.0206853	-1.36216	0.399959	8.68287	0.58978	0.000310685	0.23964	0.0286521	0.23964
CYFIP1	ENST00000561263.2	0.000666834	0.0208371	-3.61335	1.06186	1.86426	3.76757	0.760954	-0.692387	0.930355	0.930355
SLC8A1	ENST00000407929.6	0.000668751	0.0208549	-0.818734	0.240657	7.64695	0.271806	0.00275174	0.0841218	0.0248623	0.0841218
DTNA	ENST00000554864.7	0.000677378	0.0210838	-1.18682	0.349211	5.41053	0.578775	0.022469	0.160454	0.0536029	0.160454
RAD50	ENST00000533482.5	0.000684273	0.0212478	-0.626664	0.184541	6.49417	0.178412	0.00818762	0.0428953	0.0307053	0.0428953
MTSS1	ENST00000518547.5	0.000688174	0.0213067	-0.748434	0.220501	7.23742	0.172512	0.0061917	0.066739	0.0256646	0.066739
DPY19L2P1	ENST00000458672.5	0.000690943	0.0213708	-1.16933	0.344616	4.20991	0.506994	0.0214487	0.156692	0.14541	0.156692
WDFY3	ENST00000426414.6	0.000693389	0.021399	-1.63911	0.483201	3.6821	0.596593	0.102437	0.0207862	0.247788	0.247788
DPY19L2P1	ENST00000436258.1	0.000707362	0.0217073	-1.16162	0.342995	4.12466	0.430672	0.0178582	0.0675824	0.15861	0.15861
KIFAP3	ENST00000361580.7	0.000719908	0.0220407	-0.77103	0.227988	8.31872	0.210104	0.000794035	0.0771741	0.0263	0.0771741
ATG16L1	ENST00000392018.1	0.00072636	0.0221553	-0.951236	0.281478	5.10679	0.26438	0.0518381	0.0198291	0.0670069	0.0670069
ATG16L1	ENST00000626639.1	0.00072636	0.0221553	-0.951236	0.281478	5.10679	0.26438	0.0518381	0.0198291	0.0670069	0.0670069
PAM	ENST00000504456.1	0.000727958	0.0221937	-0.96394	0.285288	6.39409	0.268592	0.0110119	0.111072	0.0318196	0.111072
NOTCH2NLA	ENST00000362074.7	0.000728447	0.0221983	-0.608048	0.179968	5.81714	0.12795	0.00704932	0.00165835	0.0415334	0.0415334
HACD1	ENST00000471481.1	0.00073023	0.0222423	-1.10648	0.327559	4.59513	0.347962	0.0590734	0.0320567	0.101869	0.101869
ANO6	ENST00000441606.2	0.00073619	0.0223925	-1.51257	0.448071	5.63238	0.878061	0.254838	-0.0448672	0.0463131	0.0463131
PABPC4	ENST00000470443.5	0.000738418	0.022429	-0.748855	0.221889	5.52373	0.192696	0.0242015	-0.00587719	0.0496509	0.0496509
SBNO1	ENST00000420886.6	0.000739066	0.0224383	-4.97441	1.47405	3.03924	7.1356	2.52182	0.737413	0.423734	0.737413
OBSCN	ENST00000284548.15	0.0007405	0.022461	-0.629089	0.186445	6.81405	0.268377	0.00583195	0.0463107	0.0279064	0.0463107
FSD2	ENST00000334574.12	0.000743017	0.0225004	-1.33765	0.396554	6.05005	0.567586	0.00466555	0.231218	0.0368138	0.231218
PNRC1	ENST00000369472.1	0.000749032	0.0226255	-0.640384	0.18997	5.72858	0.196337	0.0104381	0.0384957	0.0436949	0.0436949
SMPX	ENST00000646008.1	0.000748785	0.0226255	-1.52242	0.451613	3.66955	0.582482	0.0551881	0.0236255	0.250743	0.250743
MTMR8	ENST00000374852.4	0.000753285	0.0227225	-1.14907	0.34103	4.56133	0.469484	0.0133579	0.161095	0.104867	0.161095
PPP2CA	ENST00000472253.1	0.000756776	0.0227858	-0.712684	0.211596	5.40539	0.132405	0.0133646	0.00586682	0.0537946	0.0537946
ADPRHL1	ENST00000356501.8	0.000759256	0.0228394	-1.06284	0.315641	6.58606	0.345965	0.00229008	0.147154	0.0297907	0.147154
PPP1R12B	ENST00000618451.1	0.000763293	0.0229293	-2.00345	0.595243	2.98285	1.61746	0.0891748	0.329994	0.442297	0.442297
NA	ENST00000256031.8	0.000766638	0.022977	-4.91793	1.46168	2.57335	7.23228	1.98444	1.22034	0.59289	1.22034
FAM189A2	ENST00000455972.6	0.000771392	0.0230351	-0.858309	0.255232	6.23665	0.240349	0.0135474	0.0841674	0.0338584	0.0841674
QKI	ENST00000361195.6	0.000773466	0.0230655	-0.593158	0.176424	6.91874	0.155625	0.0128925	0.0337955	0.0272076	0.0337955
PIK3R1	ENST00000336483.9	0.000783448	0.0233101	-0.797265	0.237382	6.37934	0.256533	0.00926484	0.0752603	0.0319951	0.0752603
[truncated: 249 more rows]

## Sheet: WT v UBE2B Null2, WT down
ext_gene	target_id	pval	qval	b	se_b	mean_obs	var_obs	tech_var	sigma_sq	smooth_sigma_sq	final_sigma_sq
[truncated: 1,609 more rows]

[truncated: 1 more sheets: Read Summary]
